# Supplementary material for: The 2024 state of the climate report: Perilous times on planet Earth
Source: Oxford University Press journal article supplement (doi:10.1093/biosci/biae087), 2024-10-08
Supplement: biae087_supplemental_files.zip [file biae087_supplemental_files.zip]

**Supplemental File S2** for the article “**The 2024 state of the climate report: Perilous times on planet Earth**” published in *BioScience* by William J. Ripple, Christopher Wolf, Jillian W. Gregg, Johan Rockström, Michael E. Mann, Naomi Oreskes, Timothy M. Lenton, Stefan Rahmstorf, Thomas M. Newsome, Chi Xu, Jens-Christian Svenning, Cássio Cardoso Pereira, Beverly E. Law, Thomas W. Crowther.

**Contents:** List of countries with scientist signatories of Ripple et al. (2020) (page 1); List of scientist signatories of Ripple et al. (2020) (pages 1–452). Note that signatories are from the previously published paper:

Ripple WJ, Wolf C, Newsome TM, Barnard P, Moomaw WR. 2020. World scientists’ warning of a climate emergency. *BioScience* 70: 8–12.

**List of 165 countries with scientist signatories of Ripple et al. (2020):** Albania; Algeria; American Samoa; Andorra; Antigua and Barbuda; Argentina; Australia; Austria; Bahamas (the); Bangladesh; Barbados; Belarus; Belgium; Belize; Benin; Bermuda; Bhutan; Bolivia (Plurinational State of); Bosnia and Herzegovina; Botswana; Brazil; Brunei Darussalam; Bulgaria; Burkina Faso; Cambodia; Cameroon; Canada; Cayman Islands (the); Central African Republic (the); Chad; Chile; China; Colombia; Congo (the Democratic Republic of the); Congo (the); Costa Rica; Côte d’Ivoire; Croatia; Cuba; Curaçao; Cyprus; Czech Republic (the); Denmark; Dominican Republic (the); Ecuador; Egypt; El Salvador; Estonia; Ethiopia; Faroe Islands (the); Fiji; Finland; France; French Guiana; French Polynesia; Georgia; Germany; Ghana; Greece; Guam; Guatemala; Guyana; Honduras; Hong Kong; Hungary; Iceland; India; Indonesia; Iran (Islamic Republic of); Iraq; Ireland; Israel; Italy; Jamaica; Japan; Jersey; Kazakhstan; Kenya; Kiribati; Korea (the Republic of); Lao People’s Democratic Republic (the); Latvia; Lebanon; Lesotho; Liberia; Liechtenstein; Lithuania; Luxembourg; Macao; Macedonia, Republic of (the former Yugoslavia); Madagascar; Malawi; Malaysia; Mali; Malta; Martinique; Mauritius; Mexico; Micronesia (Federated States of); Moldova (the Republic of); Monaco; Mongolia; Montenegro; Morocco; Mozambique; Namibia; Nepal; Netherlands (the); New Caledonia; New Zealand; Nigeria; Northern Mariana Islands (the); Norway; Pakistan; Panama; Papua New Guinea; Paraguay; Peru; Philippines (the); Poland; Portugal; Puerto Rico; Qatar; Réunion; Romania; Russian Federation (the); Rwanda; São Tomé and Príncipe; Saudi Arabia; Senegal; Serbia; Seychelles; Sierra Leone; Singapore; Slovakia; Slovenia; South Africa; Spain; Sri Lanka; Sudan (the); Suriname; Swaziland; Sweden; Switzerland; Taiwan; Tanzania, United Republic of; Thailand; Togo; Tokelau; Tunisia; Turkey; Turks and Caicos Islands (the); Uganda; Ukraine; United Arab Emirates (the); United Kingdom of Great Britain and Northern Ireland (the); United States Minor Outlying Islands (the); United States of America (the); Uruguay; Venezuela (Bolivarian Republic of); Viet Nam; Virgin Islands (U.S.); Wallis and Futuna; Zambia; Zimbabwe.

**List of 15,682 scientist signatories of Ripple et al. (2020) (as of August 13, 2024):**

| Name                                | Professional Position and/or Discipline | Institution                                                                         | Country |
|-------------------------------------|-----------------------------------------|-------------------------------------------------------------------------------------|---------|
| Aalborg, Kim                        | Marine biologist                        | Norwegian institute for water sciences                                              | Norway  |
| Aarbakke, Dr. Ole Nicolai Staurland | Marine biology                          |                                                                                     | Norway  |
| Aarnoudse, Eefje                    |                                         | Center for International Development and Environmental Research, Giessen University | Germany |
| Aarssen, Lonnie                     | Professor of Biology                    | Queen’s University                                                                  | Canada  |
| Aas, Wenche                         | Senior Scientist                        | NILU - Norwegian Institute for Air Research                                         | Norway  |
| Aavik, Tsipe                        | Senior Research Fellow of Macroecology  | University of Tartu                                                                 | Estonia |
| Abad, Manuel                        | Researcher / Geology                    | Universidad de Atacama                                                              | Chile   |
| Abadie, Juliet                      | PhD in ecology                          |                                                                                     | France  |
| Abalos, Javier                      | Animal behaviour                        | University of Valencia                                                              | Spain   |

|                             |                                                             |                                                                         |                                                            |
|-----------------------------|-------------------------------------------------------------|-------------------------------------------------------------------------|------------------------------------------------------------|
| Abarca, Mariana             | Insect ecologist                                            | Georgetown University                                                   | United States of America (the)                             |
| Abate, Maria                | Assistant Professor of Biology                              | Simmons University                                                      | United States of America (the)                             |
| Abazajian, Kevork           | Professor of Physics & Astronomy                            | University of California, Irvine                                        | United States of America (the)                             |
| Abbas Khan, Muhammad Safdar | Project co ordinator /Manager                               | Not registered. Self created forest/biodiversity                        | Pakistan                                                   |
| Abbate, Jessica             | Postdoctoral Researcher in Infectious Disease Biology       | Institut de Recherche pour le Developpement                             | France                                                     |
| Abbink, Jon                 | Research professor Political anthropology & African Studies | Leiden University                                                       | Netherlands (the)                                          |
| Abbott, Brett               | Landscape Ecologist                                         |                                                                         | Australia                                                  |
| Abbott, Benjamin W.         | Assistant Professor of Ecosystem Ecology                    | Brigham Young University                                                | United States of America (the)                             |
| Abbott, Katherine           | Aquatic Ecology                                             |                                                                         | United States of America (the)                             |
| Abbott, Thorne              | Coastal & Shoreline Planner                                 | University of Hawaii                                                    | United States of America (the)                             |
| Abd Malek, Muhamad Naim     | PhD candidate                                               | University of Science Malaysia                                          | Malaysia                                                   |
| Abdelaal, Mohamed           | Associate Professor                                         | Mansoura University                                                     | Egypt                                                      |
| Abdelmoneim, Ahmed          |                                                             | Cornell University                                                      | United States of America (the)                             |
| Abdi, Asad                  | Manager director                                            | Zaminrizkavan Co. Ltd.                                                  | Iran (Islamic Republic of)                                 |
| ABDULLAH, HASAN             | (Former) Director                                           | Central Soil & Materials Research Station, New Delhi - 110025           | India                                                      |
| Abel, David                 | Environmental Science                                       |                                                                         | United States of America (the)                             |
| Abel, Daniel                | Professor of Marine Science                                 | Coastal Carolina University                                             | United States of America (the)                             |
| Abella-Gutiérrez, Jose Luis | paleoceanography                                            | CICESE                                                                  | Mexico                                                     |
| Aben, Job                   | Ecology                                                     | University of Antwerp                                                   | Belgium                                                    |
| Abessa, Denis               | Professor - Environmental Sciences                          | São Paulo State Univesity - UNESP                                       | Brazil                                                     |
| ABILHOA, VINICIUS           | Biologist                                                   | "Capão da Imbuia" Natural History Museum                                | Brazil                                                     |
| Able, Kenneth               | Professor Emeritus, Biological Sciences                     | University at Albany, SUNY                                              | United States of America (the)                             |
| Abonyi, Andras              | Postdoctoral Researcher / Freshwater Ecology                | WasserCluster Lunz (A) / MTA Centre for Ecology (H)                     | Hungary                                                    |
| abrahams, mark              | lecturer, wildlife conservation                             |                                                                         | United Kingdom of Great Britain and Northern Ireland (the) |
| ABRAM, NICOLA               | Spatial Scientist                                           | Living Landscape Alliance                                               | United Kingdom of Great Britain and Northern Ireland (the) |
| Abramowitz, Brian           |                                                             | University of Florida (Florida Museum of Natural History)               | United States of America (the)                             |
| Abrams, Melanie             |                                                             | UC Berkeley                                                             | United States of America (the)                             |
| Abrams, Kym                 | Research fellow, evolutionary biology                       | The University of Western Australia                                     | Australia                                                  |
| Abrams, Peter               | Professor Emeritus, Ecology&Evolution                       | University of Toronto                                                   | Canada                                                     |
| Abrams, Jesse               | Postdoctoral Research Fellow                                | University of Exeter                                                    | United Kingdom of Great Britain and Northern Ireland (the) |
| Abramson, Michael           | Professor of Epidemiology                                   | Monash University                                                       | Australia                                                  |
| Abreu, Paulo Cesar          | Professor - Microbial Ecology                               | Federal University of Rio Grande - FURG                                 | Brazil                                                     |
| Abreu Velez, Ana            | Scientific Director                                         | GDA                                                                     | United States of America (the)                             |
| Abrieu, Ariane              | Researcher (Biology)                                        | INSERM                                                                  | France                                                     |
| Abril Melgarejo, Valentina  | PhD student in Astrophysics                                 | Laboratoire d'Astrophysique de Marseille (LAM) Aix-Marseille Université | France                                                     |

|                            |                                                                                                            |                                                                                        |                                                            |
|----------------------------|------------------------------------------------------------------------------------------------------------|----------------------------------------------------------------------------------------|------------------------------------------------------------|
| Absil, Olivier             | Astronomer - FNRS Senior Research Associate                                                                | University of Liège                                                                    | Belgium                                                    |
| Abubakar, Ibrahim          | Laboratory technologist                                                                                    | Bayero University Kano, Nigeria                                                        | Nigeria                                                    |
| Abutaha, Maged             | Researcher                                                                                                 | Desert Research Center                                                                 | Egypt                                                      |
| Ac, Alexander              | post-doctoral researcher                                                                                   | Global Change Research Institute (CzechGlobe)                                          | Czech Republic (the)                                       |
| Acebes, Pablo              | Assistant Professor                                                                                        | Departamento de Ecología. Facultad de Ciencias. Universidad Autónoma de Madrid         | Spain                                                      |
| Acedo, Carmen              | Scientist, Botany                                                                                          | Universidad de León                                                                    | Spain                                                      |
| Acevedo, Francisca         | Agrobiodiversity Coordinator                                                                               | CONABIO                                                                                | Mexico                                                     |
| Acevedo Ramos, Fernando    | Posdoctoral fellowship                                                                                     | Universidad Nacional Autónoma de México                                                | Mexico                                                     |
| Acevedo-Whitehouse, Karina | Senior Lecturer                                                                                            | Universidad Autonoma de Queretaro                                                      | Mexico                                                     |
| ACHARD, Frederic           | Senior Scientist                                                                                           | Joint Research Centre                                                                  | Italy                                                      |
| Acharjee, Santanu          | Assistant Professor                                                                                        | Debraj Roy College                                                                     | India                                                      |
| Achuff, Peter              | Scientist Emeritus                                                                                         | Parks Canada                                                                           | Canada                                                     |
| Ackels, Tobias             | Postdoctoral researcher in Neuroscience                                                                    | The Francis Crick Institute                                                            | United Kingdom of Great Britain and Northern Ireland (the) |
| Ackerman, Joe              | Research Associate, Dept Biosystems Engineering                                                            | University of Manitoba                                                                 | Canada                                                     |
| Acosta, Manuel             | Researcher                                                                                                 | Global Change Research Institute, Czech Academy of Sciences                            | Czech Republic (the)                                       |
| Acosta, Linda              | Doctorante de Ingénierie des systèmes industriels                                                          | Université de Lorraine                                                                 | France                                                     |
| Acosta Alba, Ivonne        | Environmental Analysis Expert                                                                              | Evalivo                                                                                | France                                                     |
| Acuña Míguez, Belén        | PhD Student                                                                                                | CSIC                                                                                   | Spain                                                      |
| Adam, Samiah               | Environmental management and ecology graduate                                                              | Monash University                                                                      | Mauritius                                                  |
| Adame, Fernanda            | Research Fellow, Wetland Ecology                                                                           | Griffith University                                                                    | Australia                                                  |
| Adams, Martin              | Archaeoentomologist                                                                                        | Paleoinsect Research                                                                   | United States of America (the)                             |
| Adams, Evan                | Quantitative Ecologist                                                                                     | Biodiversity Research Institute                                                        | United States of America (the)                             |
| Adams, Michelle            | Full Professor                                                                                             | Dalhousie University                                                                   | Canada                                                     |
| Adams, Patrick             | PhD candidate / climate science and geomorphology                                                          | University of Queensland                                                               | Australia                                                  |
| Adamson, Jasper            | Senior Researcher                                                                                          | National Institute of Chemical Physics and Biophysics                                  | Estonia                                                    |
| Adamson, Evan              | Physics Student and Community Science Educator/Enthusiast (specializing in quantum physics and relativity) | CECI, Enriched Program (in addition to various university courses and lectures online) | Canada                                                     |
| Adan chici, Lidia          | Geologa                                                                                                    |                                                                                        | Spain                                                      |
| Adcock, Keryn              | Ecologist                                                                                                  | Independent & IUCN African Rhino Specialist Group                                      | South Africa                                               |
| Adebola, Aramide           | PhD Candidate/ Geography                                                                                   | University of Lagos                                                                    | Nigeria                                                    |
| Adekola, Olalekan          | Geography Lecturer                                                                                         | York St John University                                                                | United Kingdom of Great Britain and Northern Ireland (the) |
| Adetunji, Ademola          | Postdoc                                                                                                    | South African Environmental Observation Network, Ndlovu Node                           | South Africa                                               |
| Adhikari, Subodh           | Postdoctoral Researcher                                                                                    | University of Idaho                                                                    | United States of America (the)                             |
| Adibpour, Parvaneh         | Postdoc fellow/cognitive neuroscience                                                                      | Institute of cognitive sciences Marc Jeannerod                                         | France                                                     |
| adinugroho, wahyu catur    | researcher                                                                                                 | forest research and development                                                        | Indonesia                                                  |
| Adjeroud, Mehdi            | Researcher                                                                                                 | IRD                                                                                    | France                                                     |

|                            |                                                    |                                                                                                     |                                  |
|----------------------------|----------------------------------------------------|-----------------------------------------------------------------------------------------------------|----------------------------------|
| Adkins, Sasha              | Lecturer                                           | Institute of Environmental Sustainability, Loyola University Chicago                                | United States of America (the)   |
| Adkins, Collette           | Carnivore Conservation Director                    | Center for Biological Diversity                                                                     | United States of America (the)   |
| Adman, Per                 | Associate Professor in Political Science           | Uppsala University                                                                                  | Sweden                           |
| Adogame, Leslie            | Executive Director/CEO                             | Sustainable Research and Action for Environmental Development                                       | Nigeria                          |
| Adomavicius, Vytautas      | Sen. Eng., researcher                              | Kaunas University of Technology                                                                     | Lithuania                        |
| Adorján, Balázs            | research assistant, environmental sciences         | University of Debrecen                                                                              | Hungary                          |
| Adriaens, Tim              | Ecologist                                          | INBO                                                                                                | Belgium                          |
| Adriaens, Dominique        | Full Professor                                     | Universiteit Gent                                                                                   | Belgium                          |
| Adua, Lazarus              | College Professor                                  | University of Utah                                                                                  | United States of America (the)   |
| Aeby, Greta                | marine biologist                                   | Qatar University                                                                                    | Qatar                            |
| Affholder, Antonin         | PhD student, Ecology and Evolution                 | École Normale Supérieure                                                                            | France                           |
| Affigne, Tony              | Professor of Political Science                     | Providence College                                                                                  | United States of America (the)   |
| Afifi, Ahmed               | Prof. Dr.                                          | National Research Centre, Soils and Water Use Dept., Agricultural and Biological Research Institute | Egypt                            |
| Afonso, Eve                | Associate Professor                                | University of Franche-Comté                                                                         | France                           |
| Agha, Ramsy                | Principal investigator Aquatic Ecology             | Leibniz Institute of Freshwater Ecology and Inland Fisheries                                        | Germany                          |
| Agnini, Claudia            | Associate professor                                | Dept. of Geosciences- Università di Padova                                                          | Italy                            |
| Agostinho, Angelo          | Professor                                          | Universidade Estadual de Maringá - PEA                                                              | Brazil                           |
| Agostini, Ilaria           | Researcher                                         |                                                                                                     | Argentina                        |
| Aguado Caso, Mateo         | Researcher in Sustainability Science               | Social-Ecological Systems Laboratory, Department of Ecology, Universidad Autónoma de Madrid         | Spain                            |
| Aguayo-Adán, Juan Antonio  | Biologist and PhD student                          | University of Córdoba                                                                               | Spain                            |
| Aguiar, Ludmilla MS        | Associate Professor                                | Universidade de Brasília                                                                            | Brazil                           |
| Aguiar, Ivana              | Chemist                                            | Universidad de la República                                                                         | Uruguay                          |
| Aguiar, Ludmilla M S       | Associate Professor                                | Universidade de Brasília                                                                            | Brazil                           |
| Aguiar, João Marcelo       | Post Doc in Entomology                             | University of São Paulo                                                                             | Brazil                           |
| Aguilar, Ricardo           | Research & Expedition Director. Marine Biology.    | Oceana                                                                                              | Spain                            |
| Aguilar, Alfredo           | Chairman Task Force Bioeconomy                     | European Federation of Biotechnology                                                                | Belgium                          |
| Aguilar-Gonzalez, Bernardo | Executive Director/ Ecological Economics           | Fundación Neotrópica                                                                                | Costa Rica                       |
| Aguilée, Robin             | Associate professor in ecology                     | Université Paul Sabatier Toulouse 3                                                                 | France                           |
| Aguilera, Eduardo          | Biologist                                          | Technical University of Madrid                                                                      | Spain                            |
| Aguirre, Luis F.           | Conservation Biology                               | CBG UMSS                                                                                            | Bolivia (Plurinational State of) |
| Aguirre de Cárcer, Daniel  | Associate profesor, Genetics and microbial ecology | Universidad Autónoma de Madrid                                                                      | Spain                            |
| Aguirre-Ruiz, Ernesto      | Biologist - MSc Ecological Restoration.            | Fundación Global Nature                                                                             | Spain                            |
| Agustina, Novillo          | Assistant Researcher                               | IBN-CONICET                                                                                         | Argentina                        |
| Agyei-Ohemeng, James       | Lecturer                                           | University of Energy and Natural Resources                                                          | Ghana                            |
| Ahasan, Rakibul            | PhD Student, Department of Geography               | Texas A&M University                                                                                | United States of America (the)   |
| Ahluwalia, Arti            | Professor of Bioengineering                        | University of Pisa                                                                                  | Italy                            |
| Ahmad, Nariman             | Assistant Professor                                | Sulaimani University                                                                                | Iraq                             |

|                             |                                                                     |                                                                                                 |                                                            |
|-----------------------------|---------------------------------------------------------------------|-------------------------------------------------------------------------------------------------|------------------------------------------------------------|
| Ahmad, Sate                 | Research Associate / hydrology and environmental social science     |                                                                                                 | Bangladesh                                                 |
| Ahmad, Shahzada             | Professor                                                           | BCMaterials, Basque center for Materials, University of Basque country                          | Spain                                                      |
| Ahmad Yani, Andi            |                                                                     | Department of Administrative Science, Hasanuddin University                                     | Indonesia                                                  |
| Ahmed, Ayesha               | Biomedical Science                                                  | University of Southampton                                                                       | United Kingdom of Great Britain and Northern Ireland (the) |
| Ahmed, Ahmed                | Emeritus Professor                                                  | University of KwaZulu-Natal                                                                     | South Africa                                               |
| Ahrens, Dirk                | Biologist                                                           | Zoological Research Museum A. Koenig Bonn                                                       | Germany                                                    |
| Ahrholdt, Wolf              | Project Manager, Mechanical Engineering                             | Technical University of Munich                                                                  | Germany                                                    |
| Ahti, Pauliina              | Marine Biology/ PhD Candidate                                       | University of Jyväskylä                                                                         | Finland                                                    |
| Ahumada, Andrea             | Professor                                                           | Observatorio Astronomico de Cordoba                                                             | Argentina                                                  |
| Aidukaite, Jolanta          | Chief Researcher                                                    | Lithuanian Social Research Centre                                                               | Lithuania                                                  |
| Ainley, David               | Research Ecologist                                                  | an ecological consulting firm                                                                   | United States of America (the)                             |
| Aioldi, Laura               | Full Prof. Chair Ecology                                            | University of Padova                                                                            | Italy                                                      |
| Aitken, Sally               | Professor                                                           | University of British Columbia                                                                  | Canada                                                     |
| Ajello, Claudia             | Research Assistant                                                  | Department of Psychology                                                                        | Italy                                                      |
| Akama, Alberto              | Researcher                                                          | Museu Paraense Emilio Goeldi                                                                    | Brazil                                                     |
| Akander, Jan                | Associate professor in building technology/energy systems           | University of Gävle                                                                             | Sweden                                                     |
| Akiba, Sami                 | Entomology                                                          | University of Hawaii Manoa                                                                      | United States of America (the)                             |
| Al Naggar, Yahya            | Alexander von Humboldt postdoctoral fellow                          | Martin-Luther-Universität Halle-Wittenberg Institut für Biologie, Lehrstuhl Allgemeine Zoologie | Germany                                                    |
| Al Shereida, Prof.Salam     | Senior Research Scientist & CEO                                     | NUY - UNIVERSITY OF ALBERTA                                                                     | Canada                                                     |
| Al-jaibachi, Rana           | Postdoc                                                             | University of Sheffield                                                                         | United Kingdom of Great Britain and Northern Ireland (the) |
| Ala, Ugo                    | Researcher                                                          | Dept. of Veterinary Sciences, University of Turin                                               | Italy                                                      |
| Alaback, Paul               | Professor Emeritus, Forest Ecology                                  | University of Montana                                                                           | United States of America (the)                             |
| Alabdullah, Abdul Kader     | Postdoctoral Scientist                                              | John Innes Centre                                                                               | United Kingdom of Great Britain and Northern Ireland (the) |
| Alam, Muhammad Irfanul      |                                                                     | École des hautes études en santé publique, Paris                                                | France                                                     |
| Alam, Syed Ashraful         | Researcher & Operations and Networking Officer                      | University of Helsinki & ICOS (Integrated Carbon Observation System) ERIC                       | Finland                                                    |
| Alamillo, Josefa            | Professor                                                           | Universidad de Córdoba                                                                          | Spain                                                      |
| Alamshah, Aubrey            | Animal Behaviorist                                                  | Binghamton University                                                                           | United States of America (the)                             |
| alard, didier               | professor of ecology                                                | university of bordeaux                                                                          | France                                                     |
| ALARIO-FRANCO, MIGUEL ANGEL | Emeritus Professor and Member of Royal Academy of Sciences of Spain | UNIVERSIDAD COMPLUTENSE-MADRID                                                                  | Spain                                                      |
| Alaux, Cedric               | Researcher                                                          | INRA                                                                                            | France                                                     |
| Alba, Annia                 | Researcher/Biological Sciences                                      | Institute Pedro Kouri of Tropical Medicine                                                      | Cuba                                                       |
| Albane, Barbero             | PhD                                                                 | IGE                                                                                             | France                                                     |

|                                    |                                                                |                                                                         |                                                            |
|------------------------------------|----------------------------------------------------------------|-------------------------------------------------------------------------|------------------------------------------------------------|
| Albarella, Umberto                 | Professor of Zooarchaeology                                    | University of Sheffield (UK)                                            | United Kingdom of Great Britain and Northern Ireland (the) |
| Albarracin, Dolores                | Professor of Psychology and Business                           | University of Illinois at Urbana Champaign                              | United States of America (the)                             |
| ALBENNE, Cécile                    | Maître de Conférences                                          | Univeristé Paul Sabatier - Toulouse-3                                   | France                                                     |
| Albers Grieneisen, Veronica        | Reader in Systems and Predictive Biology                       | Cardiff University                                                      | United Kingdom of Great Britain and Northern Ireland (the) |
| Albert, James                      | Professor                                                      | University of Louisiana at Lafayette                                    | United States of America (the)                             |
| ALBERT, Cécile                     | researcher                                                     | CNRS                                                                    | France                                                     |
| Alberti, Paola                     | PHD Student                                                    | Neotropical Biodiversity Institute                                      | Argentina                                                  |
| Alberti, Juan                      | Researcher / Ecology                                           | Instituto de Investigaciones Marinas y Costeras (IIMyC; UNMDP-CONICET)  | Argentina                                                  |
| Alberti, Giorgio                   | Associate Professor in forest management                       | University of Udine                                                     | Italy                                                      |
| Albertin, Sarah                    | PhD student                                                    | Sorbonne Université                                                     | France                                                     |
| Alberts, Allison                   | Chief Conservation and Research Officer                        | San Diego Zoo Global                                                    | United States of America (the)                             |
| Albiero-Júnior, Alci               | PhD Student in Applied Ecology                                 | University of São Paulo, Luiz de Queiroz College of Agriculture         | Brazil                                                     |
| Albin, Roger                       | Professor of Neurology                                         | University of Michigan                                                  | United States of America (the)                             |
| Albuja Delgado, Monica Paola       | PhD candidate - Environmental Engineering                      | KAIST                                                                   | Korea (the Republic of)                                    |
| Albuquerque, Monica                | Marine Biology                                                 | EMEPC                                                                   | Portugal                                                   |
| Albuquerque, Antonio               | Associate Professor                                            | University of Beira Interior                                            | Portugal                                                   |
| Alcantara, Suzana                  | Adjunt Professor/Evolution & Botany                            | Universidade Federal de Santa Catarina (UFSC)                           | Brazil                                                     |
| Alcantara Concepcion, Pedro Camilo | Full Professor , land science and landscape ecology researcher | Universidad de Guanajuato                                               | Mexico                                                     |
| Alcantara Rodriguez, Mireia        | PhD candidate Ethnobotany                                      | Leiden University / Faculty of Archaeology                              | Netherlands (the)                                          |
| Alcántara-Ayala, Irasema           | Full Professor, Disaster Risk Research                         | Institute of Geography, National Autonomous University of Mexico (UNAM) | Mexico                                                     |
| Alcántara-Manzanares, Jorge        |                                                                | Universidad de Córdoba                                                  | Spain                                                      |
| Alcaraz, Miquel                    | Research Professor, Marine Ecology                             | CSIC                                                                    | Spain                                                      |
| Alcer, David                       | PhD Student in Physics                                         | Lund University                                                         | Sweden                                                     |
| Alciatore, Giacomo                 | PhD candidate                                                  | DEE - University of Lausanne                                            | Switzerland                                                |
| Aldırmaz, Fatma                    | Accaunt and Finance Phd.                                       | Erzincan University                                                     | Turkey                                                     |
| ALEDO, ANTONIO                     | ASSOCIATE PROFESSOR, ENVIRONMENTAL SOCIOLOGY                   | UNIVERSITY OF ALICANTE (SPAIN)                                          | Spain                                                      |
| Alemán, Deborah                    | MD                                                             | Instituto Nacional de Ciencias Médicas y Nutrición                      | Mexico                                                     |
| Alencar, Edna                      | Anthropology Professor                                         | Federal University of Pará - UFPA                                       | Brazil                                                     |
| Alevra, Mihai                      | PostDoc, Physics / Neurophysiology                             | University Medical Center Göttingen                                     | Germany                                                    |
| Alex, Carmen                       | Earth Science                                                  | Prescott College                                                        | United States of America (the)                             |
| Alexanian, Yann                    | PhD student, physics                                           | Monsieur                                                                | France                                                     |
| Alfaro-Saiz, Estrella              | Research in plant conservation                                 | Universidad de León                                                     | Spain                                                      |
| Alfieri, Lorenzo                   | Scientific Officer                                             | European Commission, Joint Research Centre                              | Italy                                                      |
| Alfonso, Leonardo                  | Senior Lecturer in Hydroinformatics                            | IHE Delft Institute for Water Education                                 | Netherlands (the)                                          |

|                          |                                                                                 |                                                                       |                                                            |
|--------------------------|---------------------------------------------------------------------------------|-----------------------------------------------------------------------|------------------------------------------------------------|
| Algueró-Muñiz, María     | PhD                                                                             | freelancer                                                            | United Kingdom of Great Britain and Northern Ireland (the) |
| Ali, Mir                 | Retired                                                                         | AIM Corporation                                                       | Canada                                                     |
| Alibert, Clement         | Ph. D. Student                                                                  | ENS                                                                   | France                                                     |
| Alidoost Salimi, Parisa  | Coral Reasercher                                                                | Islamic Azad University                                               | Iran (Islamic Republic of)                                 |
| Alinsunurin, Jason       |                                                                                 | University of Bologna                                                 | Italy                                                      |
| Alizadeh, Ismaeil        | Senior Researcher                                                               |                                                                       | Iran (Islamic Republic of)                                 |
| Alkhalawi, Eman          | PhD student                                                                     | London School of Hygiene Tropical Medicine                            | Saudi Arabia                                               |
| ALLABABIDI, Nazih        | Phd student                                                                     | Université Rouen Normandie                                            | France                                                     |
| ALLAIN, Marc             | Assistant Professor                                                             | Aix Marseille Université                                              | France                                                     |
| Allan, Rita              | Ecologist                                                                       | Natural Heritage Program                                              | United States of America (the)                             |
| Allchin, Michael         | Researcher - seasonal snow-cover                                                | University of Northern British Columbia                               | Canada                                                     |
| Allcock, Louise          | Professor of Zoology                                                            | National University of Ireland Galway                                 | Ireland                                                    |
| Allen, Julie             | Assistant Professor - Biology                                                   | University of Nevada Reno                                             | United States of America (the)                             |
| Allen, Rebecca           | Lecturer in Marine Zoology                                                      | Cornwall College                                                      | United Kingdom of Great Britain and Northern Ireland (the) |
| Allen, Andrew            | Postdoctoral Researcher                                                         | Radboud University                                                    | Netherlands (the)                                          |
| Allen, Warwick           | Postdoctoral Fellow                                                             | University of Canterbury                                              | New Zealand                                                |
| Allen, Chloe             | Animal management science                                                       | Durrell Wildlife Conservation Trust                                   | Jersey                                                     |
| Allen, Jont              | Professor of Electrical and Computer Engineering                                | University of Illinois, Urbana IL                                     | United States of America (the)                             |
| Allentoft, Morten        | Associate Professor                                                             | Globe Institute, University of Copenhagen                             | Denmark                                                    |
| Allgeier, Jacob          | assistant professor of ecology                                                  | University of Michigan                                                | United States of America (the)                             |
| Allhoff, Korinna         | researcher                                                                      | Institute of Evolution and Ecology                                    | Germany                                                    |
| ALLIER, Fabrice          | Ingenior agronomist/beekeeping                                                  | ITSAP-Institut de l'abeille                                           | France                                                     |
| Allio, Rémi              | PhD student, evolutionary biology                                               |                                                                       | France                                                     |
| Allison, Steven          | Professor of Ecology and Evolutionary Biology/Earth System Science              | University of California, Irvine                                      | United States of America (the)                             |
| Allison, Elizabeth       | Assoc. Professor of Ecology and Religion                                        | California Institute of Integral Studies                              | United States of America (the)                             |
| Allison, Taber           | Director of Research                                                            | American Wind Wildlife Institute                                      | United States of America (the)                             |
| Allison, Edward          | Professor of Marine Affairs                                                     | University of Washington                                              | United States of America (the)                             |
| Allouche, Joachim        | Researcher in nanoscience                                                       | CNRS                                                                  | France                                                     |
| Almedawar, Mohamad       | Molecular Cell Biology                                                          |                                                                       | Germany                                                    |
| Almeida, Malu            | PhD Student                                                                     | Faculdade de Filosofia, Ciências e Letras - Universidade de São Paulo | Brazil                                                     |
| Almeida, Mónica          | Biologist                                                                       | Escola Superior Agrária de Coimbra                                    | Portugal                                                   |
| Almeida, Sérgio Mendonça | Professor and Researcher (Masters Program of Environmental Process Development) | Universidade Católica de Pernambuco - UNICAP                          | Brazil                                                     |
| Almeida, Wellington      | Political Science                                                               | University of Brasília - UnB                                          | Brazil                                                     |
| Almeida, José            | PhD Student in Bioinformatics                                                   | EMBL-EBI                                                              | United Kingdom of Great Britain and Northern Ireland (the) |
| Almeida Canova, Moara    | PhD student                                                                     | University of Campinas                                                | Brazil                                                     |
| Almeida-Neto, Mario      | Professor                                                                       | Federal University of Goiás                                           | Brazil                                                     |

|                                    |                                                                               |                                                                              |                                |
|------------------------------------|-------------------------------------------------------------------------------|------------------------------------------------------------------------------|--------------------------------|
| Almeida-Val, Vera                  | Senior Researcher                                                             | Brazilian National Institute for Research in the Amazon                      | Brazil                         |
| Almgren, Mats                      | professor emeritus / Physical Chemistry                                       | Uppsala University                                                           | Sweden                         |
| Almonacid, Boris                   | Research                                                                      | Global Change Science                                                        | Chile                          |
| Aloni, Irith                       | Ecology                                                                       | Ben Gurion University of the Negev                                           | Israel                         |
| Alonso, Cecilia                    | Associate Professor, Microbial Ecologist                                      | Universidad de la República                                                  | Uruguay                        |
| Alonso, Rocio                      | Senior researcher in ecology                                                  | CIEMAT                                                                       | Spain                          |
| Alonso, Carlos                     | Lecturer / Applied Limnology                                                  | Universidad Politécnica de Madrid                                            | Spain                          |
| Alonso-Alvarez, Carlos             | Staff Researcher                                                              | CSIC                                                                         | Spain                          |
| Alonso-Zarazaga, Miguel Angel      | Tenured scientist - Entomologist (retired)                                    | Museo Nacional de Ciencias Naturales (CSIC)                                  | Spain                          |
| Alory, Gael                        | Researcher in physical oceanography                                           | University of Toulouse                                                       | France                         |
| ALOUÏ, Chaker                      | Post Doc                                                                      | INSERM                                                                       | France                         |
| ALPINE, ANDREA                     | Retired Senior Executive for the Department of Interior and aquatic ecologist | United States Department of the Interior                                     | United States of America (the) |
| Alric, Benjamin                    | Postdoctoral researcher                                                       | IRSTEA                                                                       | France                         |
| Alström, Per                       | Professor                                                                     | Uppsala University                                                           | Sweden                         |
| Alt, Wolfgang                      | Senior scientist, physics                                                     | Institute of Applied Physics, University of Bonn, Germany                    | Germany                        |
| Altamirano, Maria                  | Associate Profesor/ Botany                                                    | Universidad de Málaga                                                        | Spain                          |
| Altan-Ochir, Setsen                | Masters student (Geoscience)                                                  | Ecole Normale Supérieure                                                     | France                         |
| Altena, Bas                        | Postdoctoral Researcher / Glaciology                                          | University of Oslo                                                           | Norway                         |
| Altenberg, Lee                     | Graduate Faculty in Ecology, Evolution, and Conservation Biology              | University of Hawai'i at Mānoa                                               | United States of America (the) |
| Alter, Elizabeth                   | Associate Professor/Biology                                                   | York College/CUNY                                                            | United States of America (the) |
| Alter, Katharina                   | Post-doc in marine animal ecophysiology                                       | Universität Hamburg                                                          | Germany                        |
| Alther, Roman                      | Ecology Postdoc                                                               |                                                                              | Switzerland                    |
| Altman, Ann                        | Retired                                                                       | Bioscript                                                                    | United States of America (the) |
| Altman, Jan                        | Researcher                                                                    | Institute of Botany of the CAS, v. v. i.                                     | Czech Republic (the)           |
| Altman-Kurosaki, Noam              | Marine Biology                                                                | The University of Hawaii at Manoa                                            | United States of America (the) |
| Altmann, Keith                     | Retired Civil Engineer/Town Planner                                           | Melbourne University, Warnambool Technical College.                          | Australia                      |
| Alvarenga, Renato                  | PhD student in Fungal Biology                                                 | Universidade Federal de Pernambuco                                           | Brazil                         |
| Álvares, Francisco                 | Post-doctoral Researcher, Wildlife Ecology                                    | CIBIO-InBIO, University of Porto                                             | Portugal                       |
| Alvarez, Ines                      | Scientific (Plant Science)                                                    | Real Jardin Botanico, Consejo Superior de Investigaciones Cientificas (CSIC) | Spain                          |
| Alvarez, Valentina                 | Graduate Student                                                              | University of Hawaii                                                         | United States of America (the) |
| ALVAREZ, BRENDA                    | PHD STUDENT                                                                   | CICTERRA-CONICET-UNC                                                         | Argentina                      |
| Álvarez, Valeria                   | Agrobiotechnology engineer - PhD candidate                                    | CONICET - INTA                                                               | Argentina                      |
| Álvarez, Inés                      | Scientific on Plant Sciences                                                  | Real Jardín Botánico, CSIC                                                   | Spain                          |
| Álvarez Calderón, Francisco Samuel | Researcher                                                                    | Fundación Naturaleza El Salvador                                             | El Salvador                    |
| Álvarez Salgado, X. Anton          | Research Professor                                                            | Spanish Research Council                                                     | Spain                          |
| Álvarez-Álvarez, Pedro             | Professor of Forest Ecology and Management                                    | University of Oviedo                                                         | Spain                          |



|                            |                                                                                |                                                                             |                                                            |
|----------------------------|--------------------------------------------------------------------------------|-----------------------------------------------------------------------------|------------------------------------------------------------|
| Álvarez-Cansino, Leonor    | Postdoctoral Researcher Associate                                              | Department of Functional and Tropical Plant Ecology, University of Bayreuth | Germany                                                    |
| Alvarez-Davila, Esteban    | PhD in Ecology                                                                 | National Open and Distance University                                       | Colombia                                                   |
| Alvarez-Manjarrez, Julieta | PhD student                                                                    | Instituto de Biología, Universidad Nacional Autónoma de México              | Mexico                                                     |
| Alvarez-Romero, Jorge      | Research Fellow                                                                | James Cook University                                                       | Australia                                                  |
| Alvarez-Salas, Luis        | Department Chief                                                               | Centro de Investigacion y de Estudios Avanzados del I.P.N.                  | Mexico                                                     |
| Alves, Marie-Hélène        | Research Engineer in Chemistry                                                 |                                                                             | France                                                     |
| Alves, Rubana Palhares     | PhD student in Ecology                                                         | National Institute of Amazonian Research - INPA                             | Brazil                                                     |
| Alves, Fátima              | Professor of Sociology                                                         | Universidade Aberta; Centre for Functional Ecology, University of Coimbra   | Portugal                                                   |
| Alves, Maria Alice S.      | Professor                                                                      | Universidade do Estado do Rio de Janeiro                                    | Brazil                                                     |
| Alves, Lia                 | Postdoctoral researcher                                                        |                                                                             | Spain                                                      |
| Alves, Luiz                | Professor                                                                      | São Paulo University                                                        | Brazil                                                     |
| Alves, Jorge               |                                                                                | Faculdade de ciencias da universidade de lisboa                             | Portugal                                                   |
| Alves, Ruy                 | Professor                                                                      | MUSEU NACIONAL, UNIVERSIDADE FEDERAL DO RIO DE JANEIRO                      | Brazil                                                     |
| Alves, Maria Isabel        | Master Student / Epidemiology                                                  | Faculdade de Medicina da Universidade de Lisboa                             | Portugal                                                   |
| Alves, Isabel              | Ecology-Environmental Education                                                | NeoPangea Project                                                           | Portugal                                                   |
| Alves-de-Souza, Catharina  | Research Professor (Phytoplankton Ecology)                                     | University of North Carolina Wilmington                                     | United States of America (the)                             |
| Alves-Pereira, Alessandro  | Post-doc                                                                       | State University of Campinas                                                | Brazil                                                     |
| Alvord, Charlotte          | PhD Candidate in Ecotoxicology and environmental science                       | University of Gothenburg                                                    | Sweden                                                     |
| Amabilino, David           | Professor of Sustainable Chemistry                                             | University of Nottingham                                                    | United Kingdom of Great Britain and Northern Ireland (the) |
| Amadon, Alexis             | Physicist                                                                      | CEA-Saclay / NeuroSpin                                                      | France                                                     |
| Amador, Francisco          | Profesor Contratado Doctor / Departamento de Economía, Contabilidad y Finanzas | Universidad de La Laguna                                                    | Spain                                                      |
| Amador, Lucila             | Doctora en Ciencias Biológicas                                                 | Unidad Ejecutora Lillo (UEL: FML-CONICET)                                   | Argentina                                                  |
| Amani, Christian           | Forest ecologist                                                               | Université Officielle de Bukavu                                             | Congo (the Democratic Republic of the)                     |
| Amaral, Maria C E          | Professor / Botany                                                             | Depto. Biol. Vegetal, Inst. Biologia Unicamp                                | Brazil                                                     |
| Amarasinghe, Upali         | Senior Professor in Zoology                                                    | University of Kelaniya                                                      | Sri Lanka                                                  |
| Amarelle, Vanesa           | Microbiologist                                                                 | IIBCE                                                                       | Uruguay                                                    |
| Amarello, Melissa          | Executive Director                                                             | Advocates for Snake Preservation                                            | United States of America (the)                             |
| Amaro, Teresa              | Researcher                                                                     | CIIMAR                                                                      | Portugal                                                   |
| Amaya, Iraida              | Researcher in plant biotechnology                                              | IFAPA, Junta de Andalucía                                                   | Spain                                                      |
| Ambrose, John              | Aboretum Curator/Graduate Faculty; Curator of Botany                           | University of Guelph; Toronto Zoo (retired)                                 | Canada                                                     |
| Ambrosini, Roberto         | Associate Professor of Ecology                                                 | University of Milan                                                         | Italy                                                      |
| Amélineau, Françoise       | Postdoc, ecology                                                               | Norwegian Polar Institute                                                   | Norway                                                     |

|                         |                                                       |                                                                                     |                                                            |
|-------------------------|-------------------------------------------------------|-------------------------------------------------------------------------------------|------------------------------------------------------------|
| Amend, Clara            | Research associate & doctoral candidate               | Leuphana University Lüneburg                                                        | Germany                                                    |
| Ament, Judith           | PhD candidate                                         | Institute of Zoology, Zoological Society of London                                  | United Kingdom of Great Britain and Northern Ireland (the) |
| Amenu, Kebede           | Food Safety/Veterinary Epidemiology                   | Addis Ababa University                                                              | Ethiopia                                                   |
| Amezcu, Felipe          | Research professor in fisheries and estuarine ecology | Instituto de Ciencias del Mar y Limnología, Universidad Nacional Autónoma de México | Mexico                                                     |
| Ameztegui, Aitor        | Researcher                                            | University of Lleida                                                                | Spain                                                      |
| Ameztoy, Iban           | Remote Sensing Analyst                                |                                                                                     | Spain                                                      |
| Amici, Federica         | Post-Doc Researcher                                   | MPI for Evolutionary Anthropology                                                   | Germany                                                    |
| Amiji, Burhan           | Senior Technical Officer                              | Western Sydney University                                                           | Australia                                                  |
| AMILHAT, Elsa           | research ingenior                                     | Université de Perpignan UMR5110 CNRS-UPVD                                           | France                                                     |
| Amilk, Flora            | PhD student in aquatic biology                        | University Laval                                                                    | Canada                                                     |
| Amin, Anam              | PhD Student                                           | Department of Land, Environment, Agriculture and Forestry, University of Padova     | Italy                                                      |
| Amin, Shady             | Associate Professor of Biology                        | New York University Abu Dhabi                                                       | United Arab Emirates (the)                                 |
| Ammarell, Gene          | Associate professor emeritus                          | Ohio University                                                                     | United States of America (the)                             |
| Ammer, Christian        | Professor of Silviculture and Forest Ecology          | University of Göttingen                                                             | Germany                                                    |
| Amorim, Felipe          | Professor of Ecology                                  | São Paulo State University                                                          | Brazil                                                     |
| Amoroso, Mariano        | Scientist                                             | CONICET                                                                             | Argentina                                                  |
| Amory, Charles          | post-doctoral researcher (FNRS) / polar climatology   | University of Liège                                                                 | Belgium                                                    |
| Amos, Bonnie            | Professor, botany                                     | Angelo State University                                                             | United States of America (the)                             |
| Ampt, Eline             | PhD candidate Plant Ecology and Nature Conservation   | Wageningen University                                                               | Netherlands (the)                                          |
| Amputu, Vistorina       | Research Assistant                                    | University of Tuebingen                                                             | Namibia                                                    |
| Amthor, Thomss          | Senior Scientist, physics                             | Philips Research                                                                    | Germany                                                    |
| Amy, Jean-Jacques       | Emeritus professor of Obstetrics & Gynaecology        | School of Medicine & Pharmacy, Vrije Universiteit Brussel, Brussels.                | Belgium                                                    |
| Ana B, Montero-Rocha    | Aquaculture Health Management                         |                                                                                     | Mexico                                                     |
| Ana Elena, Dumitriu     | Postdoc                                               | IFIN-HH                                                                             | Romania                                                    |
| Anadon-Rosell, Alba     | Plant Ecologist                                       | University of Greifswald                                                            | Germany                                                    |
| Ancrenaz, marc          | Scientific Director                                   | HUTAN                                                                               | Malaysia                                                   |
| Andersen, Natalie       | PhD Researcher                                        | University of York                                                                  | United Kingdom of Great Britain and Northern Ireland (the) |
| Andersen, Mikkel F.     | Assoc Prof in Physics                                 | University of Otago                                                                 | New Zealand                                                |
| Andersen, Erin          | Environmental Science, Atmospheric Chemistry          | Indiana University - Bloomington                                                    | United States of America (the)                             |
| Andersen, Henrik Rasmus | Professor, Environmental Engineering                  | Technical University of Denmark                                                     | Denmark                                                    |
| Andersen, Brannon       | Professor of Earth And Environmental Sciences         | Furman University                                                                   | United States of America (the)                             |
| ANDERSEN, Ann           | Assistant Professor in Marine Biology                 | Sorbonne University                                                                 | France                                                     |
| Anderson, Craig         | Scientist, Biogeochemistry and geomicrobiology        | The New Zealand Institute for Plant and Food Research                               | New Zealand                                                |
| Anderson, Jess          | MD                                                    |                                                                                     | Australia                                                  |
| Anderson, Jacob         | Geophysics Research Scientist                         | Boise State University                                                              | United States of America (the)                             |
| Anderson, David         | Professor                                             | Wake Forest University                                                              | United States of America (the)                             |

|                           |                                                           |                                                                                          |                                                            |
|---------------------------|-----------------------------------------------------------|------------------------------------------------------------------------------------------|------------------------------------------------------------|
| Anderson, Jacob           | PhD Student- Tropical Ecology                             | University of York                                                                       | United Kingdom of Great Britain and Northern Ireland (the) |
| Anderson, Ileene          | Senior Scientist                                          | Center for Biological Diversity                                                          | United States of America (the)                             |
| Anderson, James           | Davis-Michael Professor of Forestry and Natural Resources | West Virginia University                                                                 | United States of America (the)                             |
| Anderson, Molly           | Food Studies                                              | Middlebury College                                                                       | United States of America (the)                             |
| Anderson, Judith          | Retired biologist                                         |                                                                                          | Canada                                                     |
| Anderson, Liana           | Researcher/Environmental Change in Amazonia               | Cemaden                                                                                  | Brazil                                                     |
| Anderson, Steven          | Prof. Emeritus, Biological sciences                       | University of the Pacific                                                                | United States of America (the)                             |
| Anderson, Iris            | Professor of Marine Science                               | Virginia Institute of Marine Science, William & Mary                                     | United States of America (the)                             |
| Anderson, William         | Profeesor emeritus                                        | Grice Marine Biological Laboratory                                                       | United States of America (the)                             |
| Anderson, Brian           | Associate Professor, Glaciology                           | Te Herenga Waka - Victoria University of Wellington                                      | New Zealand                                                |
| Anderson, Marc            | Environmental Engineer                                    | Marc Anderson, P.E.                                                                      | United States of America (the)                             |
| Anderson, Laurel          | Professor of plant ecology                                | Ohio Wesleyan University                                                                 | United States of America (the)                             |
| Anderson, John            | Associate Lecturer, Physics                               | University of North Florida                                                              | United States of America (the)                             |
| Anderson, Albert          | PhD in Physics, 1968                                      | Stanford University                                                                      | United States of America (the)                             |
| Anderson, James           | Energy & Environmental Policy                             | University of Mississippi                                                                | United States of America (the)                             |
| Andersson, David          | PhD                                                       | University of Gothenburg                                                                 | Sweden                                                     |
| Andersson, Maöte          | Professor emeritus, Animal Ecology                        | Department of Biology and Environment, University of Gothenburg                          | Sweden                                                     |
| Andersson, Astrid Alex    | Post Doctoral Fellow                                      | the University of Hong Kong                                                              | Hong Kong                                                  |
| Andersson, Karolin        | PhD Student Rural Development                             | Swedish University of Agricultural Sciences                                              | Sweden                                                     |
| Andersson Bruck, Kjerstin | PhD, Lecturer in Socal Work                               | Örebro University                                                                        | Sweden                                                     |
| Andivia, Enrique          | Postdoctoral researcher                                   | Universidad Complutense de Madrid                                                        | Spain                                                      |
| Andrade, Pedro            | PhD student, Biological sciences                          | CIBIO/InBIO, University of Porto                                                         | Portugal                                                   |
| Andrade, Charlene         | Environmental scientist                                   | Washington State Department of Commerce                                                  | United States of America (the)                             |
| Andrade, Sonia            | Assistant Professor                                       | USP                                                                                      | Brazil                                                     |
| Andrade, Daniel           | Professor of Environmental Economics                      | Federal University of Uberlândia (Brazil) and Brazilian Society for Ecological Economics | Brazil                                                     |
| Andrade, André            | PhD Student                                               | Universidade Federal de Goiás                                                            | Brazil                                                     |
| ANDRADE, ANTONIO CARLOS   | Researcher in Seed ecology and Plant Sciences             | Rio de Janeiro Botanic Garden Research Institute                                         | Brazil                                                     |
| Andrade-Núñez, María José | Instructor/Teacher, PhD Environmental Science             | University of Puerto Rico                                                                | Puerto Rico                                                |
| Andrae, Dirk              | Physical and Theoretical Chemistry                        | Freie Universität Berlin                                                                 | Germany                                                    |
| andre, nicolas            | researcher in astrophysics                                | IRAP                                                                                     | France                                                     |
| André, Thiago             | Professor of Genetics                                     | Universidade Federal do Oeste do Para                                                    | Brazil                                                     |
| André, Hampus             | PhD candidate, Industrial Ecology                         | Chalmers University of Technology                                                        | Sweden                                                     |
| Andrea, Persico           | Biologist                                                 | Pro Natura Ticino                                                                        | Switzerland                                                |
| Andreatta, Maria Marta    | PhD in Health Sciences.                                   | CIECS, CONICET y UNC                                                                     | Argentina                                                  |
| Andreeff, Walter          | Applied Environmental Geologist                           | Métis Nation of Alberta                                                                  | Canada                                                     |
| Andrelo, Marco            | Researcher                                                | Institut de Recherche pour le Développement                                              | France                                                     |
| ANDREONE, FRANCO          | Zoologist                                                 | Museo Regionale di Scienze Naturali, Torino                                              | Italy                                                      |

|                                   |                                                                      |                                                                       |                                                            |
|-----------------------------------|----------------------------------------------------------------------|-----------------------------------------------------------------------|------------------------------------------------------------|
| Andres-Penares, Daniel            | Researcher during PhD, Material Science                              | University of Valencia                                                | Spain                                                      |
| Andresen, Niek                    | PhD Candidate                                                        | TU Berlin                                                             | Germany                                                    |
| ANDRESEN, ELLEN                   | PROFESSOR OF ECOLOGY                                                 | UNIVERSIDAD NACIONAL AUTOMOMA DE MEXICO                               | Mexico                                                     |
| andrew, scott                     | lecturer/researcher                                                  | charles sturt university                                              | Australia                                                  |
| Andrew, Nigel                     | Professor of Entomology                                              | University of New England                                             | Australia                                                  |
| Andrews, Clare                    | Postdoctoral Research Associate, Behavioural Biology                 | Newcastle University                                                  | United Kingdom of Great Britain and Northern Ireland (the) |
| Andrews, Samantha                 | PhD Researcher, Marine Biology/Ecology                               | Memorial University, Newfoundland                                     | Canada                                                     |
| Andrews, Jane                     | Ecosystems advisor                                                   |                                                                       | New Zealand                                                |
| Andrews, Allen H                  | Research Fisheries Biologist                                         | University of Hawaii                                                  | United States of America (the)                             |
| ANDRIANARIVO, Vanja               | Researcher (Geographer, Biogeographer and landscape dynamics expert) | Centre National de Recherches sur l'Environnement                     | Madagascar                                                 |
| Andrieu, Bruno                    | Senior scientist / Ecophysiologist                                   | INRA                                                                  | France                                                     |
| Andriguetto, Jose                 | Professor of Anima Science and Veterinary Medicine                   | Federal University of Parana State                                    | Brazil                                                     |
| Andriguetto-Filho, José Milton    | Professor of Environmental Sciences                                  | Universidade Federal do Paraná                                        | Brazil                                                     |
| Andruchow, Ileana                 | Researcher                                                           | IALP - CONICET                                                        | Argentina                                                  |
| Aney, Warren                      | Wildlife Ecology                                                     | Oregon Department of Fish & Wildlife; Resources Northwest Consultants | United States of America (the)                             |
| Anfodillo, Tommaso                | Professor of Forest Ecology                                          | University of Padova, Dept. TESAF                                     | Italy                                                      |
| Angelstam, Peril                  | Professor, sustainability science                                    | Swedish University of Agricultural Sciences                           | Sweden                                                     |
| Angerhausen, Daniel               | Research Fellow                                                      | Center for Space and Habitability - Bern University                   | Switzerland                                                |
| Anglaret, Xavier                  | Senior Researcher in Infectious Diseases                             | University of Bordeaux                                                | France                                                     |
| Angles, Mark                      | PhD Microbiology                                                     |                                                                       | Australia                                                  |
| Angulo, Arturo                    | Research associate                                                   | University of Costa Rica                                              | Costa Rica                                                 |
| Angulo, Maria Cecilia             | Neuroscience                                                         | CNRS                                                                  | France                                                     |
| Angulo, Elena                     | Researcher                                                           |                                                                       | Spain                                                      |
| Anholetto Junior, Claudio Roberto | Program Coordinator                                                  | Mamirauá Institute for Sustainable Development                        | Brazil                                                     |
| Anjos, Diego                      | Post doc in Ecology                                                  | Federal University of Uberlândia                                      | Brazil                                                     |
| Anna, Kondratyeva                 | PhD                                                                  | MNHN                                                                  | France                                                     |
| Annamaria, Fenesi                 | Invasion ecologist                                                   | Babes-Bolyai University                                               | Romania                                                    |
| Annonier, Marianne                | PhD student                                                          | Institut des Sciences de l'Evolution de Montpellier (ISEM)            | France                                                     |
| Anmys, Sofie                      | PhD student in Physical Geography                                    | Ghent University                                                      | Belgium                                                    |
| Anquetin, Guillaume               | Assistant Professor in Chemistry                                     | Université de Paris - Université Paris Diderot                        | France                                                     |
| Anquetin, Sandrine                | Senior scientist                                                     | CNRS - IGE                                                            | France                                                     |
| Anschütz, Anna-Adriana            | PhD student of marine biology                                        | Swansea University                                                    | United Kingdom of Great Britain and Northern Ireland (the) |
| Anselmetti, Yoann                 | Post-doctoral researcher                                             | Institut des Sciences de l'Evolution de Montpellier (ISEM - UMR5554)  | France                                                     |
| Anson, Jennifer                   | Ecologist                                                            | Australian Wildlife Conservancy                                       | Australia                                                  |
| ANSTETT, Marie Charlotte          | Senior researcher                                                    | CNRS                                                                  | France                                                     |

|                          |                                                                                           |                                                                          |                                                            |
|--------------------------|-------------------------------------------------------------------------------------------|--------------------------------------------------------------------------|------------------------------------------------------------|
| Anstock, Fabian          | Research associate in the field of wind energy                                            | Hamburg University of Applied Sciences                                   | Germany                                                    |
| Anta, Adolfo             | Senior Researcher, Power Systems                                                          | AIT                                                                      | Austria                                                    |
| Ante-Testard, Pearl Anne | PhD candidate                                                                             | Conservatoire national des Arts et Métiers                               | France                                                     |
| Anthony, Francois        | Director of research                                                                      | IRD                                                                      | France                                                     |
| Anthony, Carl            | Professor, Biology                                                                        | John Carroll University                                                  | United States of America (the)                             |
| Antiqueira, Pablo        | Post doc                                                                                  | Unicamp                                                                  | Brazil                                                     |
| Antoine, Pierre-Olivier  | Professor, Paleontology                                                                   | Institut des Sciences de l'Evolution de Montpellier, UM, CNRS, IRD, EPHE | France                                                     |
| Antón-Pacheco, Carmen    | Geologist (retired)                                                                       | Instituto Geológico y Minero de España                                   | Spain                                                      |
| ANTONA, Martine          | Researcher/ Institutional & ecological economics                                          | CIRAD                                                                    | France                                                     |
| Antonius, Sarjiya        | Senior Researcher/Agriculture-environmental microbiology                                  | National research and innovation agency                                  | Indonesia                                                  |
| Antunes-Carvalho, Caio   | Professor of Zoology                                                                      | Universidade Federal Fluminense                                          | Brazil                                                     |
| Aouacheria, Abdel        | Researcher in Biology                                                                     | CNRS                                                                     | France                                                     |
| Appel, Oliver            | Atmospheric research, PostDoc                                                             | Max Planck Institute for Chemistry                                       | Germany                                                    |
| Appert-Rolland, Cecile   | Researcher in Theoretical Physics                                                         | CNRS, University Paris-Saclay, University Paris-Sud                      | France                                                     |
| Applebaum, David         | Professor of Mathematics                                                                  | University of Sheffield                                                  | United Kingdom of Great Britain and Northern Ireland (the) |
| Appleby, Rob             | Researcher/Environmental Futures Research Institute (EFRI)                                | Griffith University                                                      | Australia                                                  |
| Applegate, Roger         | Wildlife Ecology and Physiology                                                           | University of Tennessee                                                  | United States of America (the)                             |
| Applequist, Wendy        | Associate Curator                                                                         | Missouri Botanical Garden                                                | United States of America (the)                             |
| AQUILINA, Luc            | Professor                                                                                 | University Rennes 1                                                      | France                                                     |
| Aquino, Adriana          | Ichthyologist, Research Associate                                                         | American Museum of Natural History                                       | United States of America (the)                             |
| Aragón, Pedro            | Researcher                                                                                | Museo Nacional de Ciencias Naturales (CSIC)                              | Spain                                                      |
| Aragon-Traversp, Juan    | Aracnology                                                                                | Universidad Nacional de San Juan                                         | Argentina                                                  |
| Arampankudy, Jimson      | Medical Doctor                                                                            | Somatheeram Health Group                                                 | India                                                      |
| Arana, Inés              | Microbiology                                                                              | University of the Basque Country                                         | Spain                                                      |
| Aranda, Daniel           | PhD Student, Evolutionary Biology                                                         | Max Planck Institute for Ornithology                                     | Germany                                                    |
| Aranda Lastra, Manuel    | Associate Professor Marine Molecular Ecology                                              | King Abdullah University of Science and Technology                       | Saudi Arabia                                               |
| Araneda, Nicole          | PhD in theorical sciences student                                                         | Universidad Autónoma de Madrid                                           | Spain                                                      |
| Araujo, Francisca        | Professor                                                                                 | Federal University of Ceará                                              | Brazil                                                     |
| Araújo, Márcia           | PhD student                                                                               | Faculty of Sciences, University of Porto                                 | Portugal                                                   |
| Arbe Montoya, Alejandra  | Veterinarian                                                                              | The University of Adelaide                                               | Australia                                                  |
| Arbor, Sage              | Computational Biology                                                                     | Marian University College of Medicine                                    | United States of America (the)                             |
| Arce -Funck, Julio       | Marie Curie fellow, aquatic ecology and ecotoxicology                                     | MARE - Marine and Environmental Sciences Center- University of Coimbra   | Portugal                                                   |
| Arce Peña, Norma P.      | PhD Candidate                                                                             | Universidad Nacional Autónoma de México                                  | Mexico                                                     |
| Arcela, Augusto          | Ecologist                                                                                 | Universidade de Brasília                                                 | Brazil                                                     |
| Archambault, Axel        | Food R&D Engineer - dipl. Engineer in Biomass Valorization, Agriculture and Food Industry | PM International AG                                                      | Luxembourg                                                 |
| Archambault, Philippe    | Professor                                                                                 | Université laval                                                         | Canada                                                     |

|                                |                                                                    |                                                                                                               |                                                            |
|--------------------------------|--------------------------------------------------------------------|---------------------------------------------------------------------------------------------------------------|------------------------------------------------------------|
| Archer-Nicholls, Scott         | Postdoc, atmospheric chemistry                                     | University of cambridge                                                                                       | United Kingdom of Great Britain and Northern Ireland (the) |
| Arck, Yannis                   | Graduate research assistant                                        | Herr                                                                                                          | Germany                                                    |
| Arcusa, Stephanie              | Assistant Professor in Climate Sciences                            | Arizona State University                                                                                      | United States of America (the)                             |
| Arellano-Torres, Elsa          | Associate Professor                                                | Universidad Nacional Autónoma de México                                                                       | Mexico                                                     |
| Arenas, Concepcion             | Professor. Statistics                                              | University of Barcelona                                                                                       | Spain                                                      |
| Arenas, Elizabeth              | PhD student                                                        | University of Alberta                                                                                         | Peru                                                       |
| Arenas Gonzálz, Rafael         | Biologo                                                            | Consejeria medio Ambiente. Junta Andalucía                                                                    | Spain                                                      |
| Arenas-Castro, Salvador        | Ecologist                                                          | University of Cordoba                                                                                         | Spain                                                      |
| Arens, Susanne                 | Postdoc Geobiology                                                 | Globe Institute, University of Copenhagen                                                                     | Denmark                                                    |
| Aretxabala, Antonio            | Resesecher Geologist                                               | Universidad de Zaragoza                                                                                       | Spain                                                      |
| Arfan, Muhammad                | PhD                                                                | University of Gävle                                                                                           | Sweden                                                     |
| Arfanzaman, Md.                | National Expert (Environment & Climate Change)                     | The Food and Agriculture Organization of the United Nations (FAO)                                             | Bangladesh                                                 |
| Arfin Khan, Mohammed Abu Sayed | Professor                                                          | Shahjalal University of Science and Technology, Sylhet -3114.                                                 | Bangladesh                                                 |
| Arfin-Khan, Mohammed Abu Sayed | Associate Professor                                                | Department of Forestry and Environmental Science, Shahjalal University of Science and Technology, Sylhet-3114 | Bangladesh                                                 |
| Arguelolo, Ricardo             | Electrical Engineer                                                | Independent Writer "How to Predict an Environmental Crisis" In search of a Simpler Economy                    | Costa Rica                                                 |
| Arguiñena, José Luis           | Arquitecto                                                         | Arquitecto Independiente                                                                                      | Argentina                                                  |
| Arias, Mónica                  | Biologist                                                          | Centre of Evolutionary and Functional Ecology                                                                 | France                                                     |
| Arias González, Jesús Ernesto  | Professor                                                          | Centro de Investigación y de Estudios Avanzados del I.P.N.                                                    | Mexico                                                     |
| Arias Jimenez, Juan Carlos     | Biologist                                                          | Universidad del Zulia                                                                                         | Venezuela (Bolivarian Republic of)                         |
| Arias Ortiz, Angela            | Marine biologist                                                   | Fundacion Gente y Ambiente                                                                                    | Colombia                                                   |
| Aristegui, Javier              | Professor                                                          | Universidad de Las Palmas de Gran Canaria                                                                     | Spain                                                      |
| Ariz, Idoia                    | Researcher                                                         | Universidad de Navarra                                                                                        | Spain                                                      |
| Ariza, María Alejandra         | Estudiante biología                                                | Pontificia universidad Javeriana                                                                              | Colombia                                                   |
| Ärje, Johanna                  | Post doc, statistics                                               |                                                                                                               | Finland                                                    |
| Arlt, Debora                   |                                                                    | Sweish University of Agricultural Sciences                                                                    | Sweden                                                     |
| Arman Kalkandeler, Ayse        | Psychology                                                         | Uludag University                                                                                             | Turkey                                                     |
| Armati, Patricia               | Professor, Neuroscience                                            | The University of Sydney                                                                                      | Australia                                                  |
| Armbrecht, Inge                | Full Professor                                                     | Universidad del Valle, Cali                                                                                   | Colombia                                                   |
| Armbruster, W. Scott           | Principal Research Scientist                                       | University of Alaska Fairbanks                                                                                | United States of America (the)                             |
| Armendariz, Laura Cecilia      | Docente Investigador                                               | Instituto de Limnología "Dr. Raul Ringuelet" (ILPLA)                                                          | Argentina                                                  |
| Armenteras, Dolors             | Associate Professor                                                | Universidad Nacional de Colombia                                                                              | Colombia                                                   |
| Armitage, Sophie               | Group leader/Researcher                                            | Freie Universitaet Berlin                                                                                     | Germany                                                    |
| Armitage, Kenneth              | Distinguished Professor Emeritus of Ecology & Evolutionary Biology | The University of Kansas                                                                                      | United States of America (the)                             |
| Armstrong, Doug                | Professor of Conservation Biology                                  | Massey University                                                                                             | New Zealand                                                |

|                             |                                                                                           |                                                       |                                                            |
|-----------------------------|-------------------------------------------------------------------------------------------|-------------------------------------------------------|------------------------------------------------------------|
| Armstrong, Bruce            | Emeritus Professor, Public Health                                                         | University of Sydney                                  | Australia                                                  |
| Armstrong, Joel             | Post Doctoral Fellow, Psychology                                                          | University of Western Ontario                         | Canada                                                     |
| Arn, Luise                  | Data Scientist                                                                            | University of Zurich/ ETH                             | Switzerland                                                |
| Arnaud, Patrick             | Researcher in hydrology                                                                   | IRSTEA                                                | France                                                     |
| ARNAUD HAOND, Sophie        | Researcher                                                                                | Ifremer                                               | France                                                     |
| Arnfield, John              | Professor Emeritus (Geography, Atmospheric Sciences)                                      | The Ohio State University                             | United Kingdom of Great Britain and Northern Ireland (the) |
| Arnillas, Carlos Alberto    | Postdoctoral fellow, ecological modelling                                                 | University of Toronto - Scarborough                   | Canada                                                     |
| Arnold, Gilles              | Mechanics - ecodesign                                                                     | Université de Haute Alsace                            | France                                                     |
| Arnold, Todd                | Senior Technical Staff Member                                                             | IBM                                                   | United States of America (the)                             |
| Arnold, Steven              | Biochemist                                                                                | Pathology Queenslad                                   | Australia                                                  |
| Arnold, Madison             | MSc Graduate Student                                                                      | University of British Columbia Okanagan               | Canada                                                     |
| Arnolda, Leonard            | Clinical Director, Illawarra Health & Medical Research Institute/ Professor of Cardiology | Illawarra Health & Medical Research Institute         | Australia                                                  |
| Arnott, Chelsea             | Planner                                                                                   | Hawaii Invasive Species Council                       | United States of America (the)                             |
| Arnscheidt, Joerg           | Senior Lecturer / Earth Systems Sciences                                                  | Ulster University                                     | United Kingdom of Great Britain and Northern Ireland (the) |
| Arnsperger, Christian       | Professor in sustainability                                                               | University of Lausanne                                | Switzerland                                                |
| Aron, Adam                  | Professor of Psychology                                                                   | University of California, San Diego                   | United States of America (the)                             |
| Arora, Ramesh               | Sr Entomologist                                                                           | Punjab Agricultural University, Ludhiana, India       | India                                                      |
| Arosio, Diego               | Associate Professor of Applied Geophysics I                                               | Università degli studi di Modena e Reggio Emilia      | Italy                                                      |
| Arranz, Ignasi              | postdoc                                                                                   | University of Vic-UCC                                 | Spain                                                      |
| ARREBOLA BURGOS, JOSE RAMON | Professor/Doctor in Biology                                                               | University of Seville                                 | Spain                                                      |
| Arridge, Christopher        | Royal Society Research Fellow and Reader in Space Physics                                 | Lancaster University                                  | United Kingdom of Great Britain and Northern Ireland (the) |
| Arrieta, Ezequiel           | PhD Fellow                                                                                | National Council of Scientific and Technical Research | Argentina                                                  |
| Arrighi, Pablo              | Professor                                                                                 | Aix-Marseille Université                              | France                                                     |
| arrojo, fernanda            | nephrologist                                                                              | H A Marcide                                           | Spain                                                      |
| Arrondo, Eneko              | Phd. candidate                                                                            | Estacion Biologica de Doñana                          | Spain                                                      |
| Arrouays, Dominique         | Sebior soil scientist                                                                     | INRA InfoSol Unit, F-45075 Orleans                    | France                                                     |
| Arroyo Oori, Ken            | 3D Geoinformation                                                                         | Delft University of Technology                        | Netherlands (the)                                          |
| Arroyo-Cabrales, Joaquin    | Paleontologist                                                                            | Instituto Nacional de Antropologia e Historia         | Mexico                                                     |
| ARROYO-CABRALES, JOAQUIN    | SENIOR SCIENTIST                                                                          | INSTITUTO NACIONAL DE ANTROPOLOGIA E HISTORIA         | Mexico                                                     |
| Arroyo-Rodríguez, Víctor    | Senior Researcher                                                                         | Universidad Nacional Autónoma de México               | Mexico                                                     |
| Arshava, Natali             | Molecular biology                                                                         | biological laboratory of Schelkovo Agrohimp JSC       | Russian Federation (the)                                   |
| Arsovski, Dragan            | Ecology and conservation with specialty in herpetology                                    | Macedonian Ecological Society                         | Macedonia, Republic of (the former Yugoslavia)             |
| Art, Henry                  | Professor of Environmental Studies & Biology                                              | Williams College                                      | United States of America (the)                             |
| Artaxo, Paulo               | Professor of Environmental Physics                                                        | University of Sao Paulo                               | Brazil                                                     |
| Artelsmair, Markus          | PhD student in Chemistry                                                                  | AstraZeneca/University of Aberdeen                    | Sweden                                                     |

|                              |                                                             |                                                                   |                                                            |
|------------------------------|-------------------------------------------------------------|-------------------------------------------------------------------|------------------------------------------------------------|
| Artes, Juan                  | Assistant Prof Biochemistry                                 | UML                                                               | United States of America (the)                             |
| Arthur, Claire               |                                                             | University of Cambridge                                           | United Kingdom of Great Britain and Northern Ireland (the) |
| Artigau, Etienne             | Research associate, astrophysics                            | Université de Montréal                                            | Canada                                                     |
| Artim, John                  | Temporary Assistant Professor, Biology                      | Arkansas State University                                         | United States of America (the)                             |
| Aruna, Edward                | Founder/Managing Director                                   | Reptile and Amphibian Program - Sierra Leone                      | Sierra Leone                                               |
| Arunachala, Auma             | Nutritional Biochemist/Professor                            | Charles University                                                | United States of America (the)                             |
| Arvesen, Anders              | Researcher, Industrial ecology                              | Norwegian University of Science and Technology (NTNU)             | Norway                                                     |
| Arvo, Roger                  | Biologist & Mathematician - Computer Consultant & Architect | Bio-Mathematics B.S. from Michigan Tech University                | United States of America (the)                             |
| Arvor, Damien                | Researcher                                                  | CNRS                                                              | France                                                     |
| Arzel, Céline                | Researcher in Waterbird and Wetland Ecology                 | University of Helsinki                                            | Finland                                                    |
| Arzolla, Frederico Alexandre | Scientific researcher (Pesquisador científico)              | Instituto de Pesquisas Ambientais                                 | Brazil                                                     |
| Asamoah, Akwasi              | Forest Science                                              | International Society Tropical Forestry-Ghana                     | Ghana                                                      |
| Ascensão, Fernando           | Postdoc researcher                                          | CIBIO - Research Center in Biodiversity and Genetic Resources     | Portugal                                                   |
| Aschenbrenner, Paula         | Junior Scientist, climate impact                            | Potsdam Institute for Climate Impact Research                     | Germany                                                    |
| Ascher, John                 | Assistant Professor, Department of Biological Sciences      | National Univeristy of Singapo                                    | Singapore                                                  |
| Ascherio, Alberto            | Professor of Epidemiology and Nutrition                     | Harvard                                                           | United States of America (the)                             |
| Ascoli, Davide               | Researcher in forest sciences                               | University of Torino                                              | Italy                                                      |
| Asgarifar, Samin             | Condensed matter Physics Phd                                |                                                                   | Iran (Islamic Republic of)                                 |
| Ashby, Auriol                | Environmental Social Science consultant                     | Ashby Associates CC                                               | Namibia                                                    |
| Ashcraft, Claire             | Geologist                                                   | Brigham Young University                                          | United States of America (the)                             |
| Ashcroft, John               | Atmospheric Dynamics                                        | Universitu of Leeds                                               | United Kingdom of Great Britain and Northern Ireland (the) |
| Ashford, Graham              | Senior Lecturer, Environmental and Resource Economics       | University of the Sunshine Coast                                  | Australia                                                  |
| Ashton, Glenn                | Geographical systems.                                       | Centre for Complex Systems in Transition, Stellenbosch University | South Africa                                               |
| Ashton, Ben                  | Postdoctoral Researcher/Biological Sciences                 | Macquarie University                                              | Australia                                                  |
| Ashton-butt, Adham           | Senior Research Ecologist                                   | British Trust for Ornithology                                     | United Kingdom of Great Britain and Northern Ireland (the) |
| Ask, Jenny                   | Assistant professor                                         | EMG, Umeå University                                              | Sweden                                                     |
| Askarizadeh Ravizi, Hossein  | Research Assistant                                          | Institute of Heat and Mass Transfer, RWTH Aachen University       | Germany                                                    |
| Asplund, Maria               | Postdoc - genomics                                          | The Globe institute                                               | Denmark                                                    |
| Assali, Julien               | Biotechnology                                               | Private company                                                   | Guatemala                                                  |
| asselman, pieter             | lab technician                                              | Meise Botanic Garden                                              | Belgium                                                    |
| Assmz, Philipp               | Biological Oceanography                                     | Norwegian Polar Institute                                         | Norway                                                     |
| Astorga, Giselle             | Paleobotany                                                 | Universidad Austral de Chile                                      | Chile                                                      |
| Astúa, Diego                 | Associate Professor - Zoology                               | Universidade Federal de Pernambuco                                | Brazil                                                     |



|                           |                                                          |                                                                  |                                                            |
|---------------------------|----------------------------------------------------------|------------------------------------------------------------------|------------------------------------------------------------|
| Atala, Cristian           | Profesor Adjunto / functional plant ecology              | Pontificia Universidad Católica de Valparaíso                    | Chile                                                      |
| Atalay, Sonya             | Provost Professor Archaeology/Anthropology               | UMass Amherst                                                    | United States of America (the)                             |
| Atanassov, Nicholay       | Lecturer of animalbreeding                               |                                                                  | Bulgaria                                                   |
| Ataro, Assefa             | Forest Resource and Ecological Restoration               | SNNPRS Environment Forest and Climate Change Control Authority   | Ethiopia                                                   |
| Atchison, Brad            | Molecular Biologist                                      | Retired; Environmental Activist and Educator                     | Canada                                                     |
| Atkins, Kelly             | PhD Student, Biology                                     | University of Exeter                                             | United Kingdom of Great Britain and Northern Ireland (the) |
| Atkins, Melissa           | Graduate Assistant Zoology                               | University of Hawai`i at Manoa                                   | United States of America (the)                             |
| Atkinson, Karina          | Executive Director                                       | Fundacion Para La Tierra                                         | Paraguay                                                   |
| Atkinson, Quentin         | Professor of Psychology                                  | University of Auckland                                           | New Zealand                                                |
| Atmadja, Stibniati        | Economist                                                | Center for International Forestry Research (CIFOR)               | Indonesia                                                  |
| Atreya, Kishor            | Research Lead                                            | PHASE Nepal                                                      | Nepal                                                      |
| Attanasio, Cláudia        | Scientific researcher; ecological restoration            | Secretary of Agriculture and Supply of the State of São Paulo    | Brazil                                                     |
| Attias, Nina              | Post-doctoral fellow                                     | Federal University of Mato Grosso do Sul                         | Brazil                                                     |
| Attorre, Fabio            | Professor of Environmental Science                       | Sapienza University of Rome                                      | Italy                                                      |
| Attwood, Colin            | Associate Professor, Marine Ecology                      | University of Cape Town                                          | South Africa                                               |
| Atzberger, Clement        | Professor in Remote Sensing and Earth Observation        | University of Natural Resources and Life Sciences (BOKU), Vienna | Austria                                                    |
| Aubert, Alice             | Scientific officer                                       |                                                                  | France                                                     |
| Aubert, Alice             | Postdoctoral scientist                                   | Eawag                                                            | Switzerland                                                |
| Audi, Georges             | Directeur de Recherche au CNRS - Nuclear Physics         | CNRS                                                             | France                                                     |
| Audic, Guillaume          | Engineer                                                 | Institute of Structural Biological                               | France                                                     |
| Audouin, Laurent          | Associated professor, Nuclear Physics                    | Université Paris-Sud                                             | France                                                     |
| Auerswald, Karl           | Professor                                                | Technical University of Munich                                   | Germany                                                    |
| Auge, Harald              | Senior Scientist, Biology                                | Helmholtz-Centre for Environmental Research - UFZ                | Germany                                                    |
| Auger, Matthis            | PhD, Physical Oceanography                               | Sorbonne Université                                              | France                                                     |
| Augeri, Dave              | Director and Associate Professor of Conservation Biology | Biodiversity Unlimited Research and Consulting Group             | United States of America (the)                             |
| Augiron, Steve            | Biology of conservation                                  | Augiron                                                          | France                                                     |
| Augsten, Mariana          | PhD Student                                              | UFMG                                                             | Brazil                                                     |
| Augustin, Thomas          | Professor of Statistics                                  | LMU Munich                                                       | Germany                                                    |
| Augustinus, Benno Andreas | PhD student, Ecology                                     | CABI                                                             | Switzerland                                                |
| Augusto, Laurent          | Senior scientist                                         | INRA                                                             | France                                                     |
| AUGUSTO, RONALDO          | Postdoc Researcher                                       | CNRS                                                             | France                                                     |
| Aukema, Brian             | Associate Professor of Forest Entomology                 | University of Minnesota                                          | United States of America (the)                             |
| Auliya, Mark              | Postdoc                                                  | Zoological Research Museum Alexander Koenig                      | Germany                                                    |
| Aumer, Wolfgang           | phd student                                              | Hochschule Geisenheim University                                 | Germany                                                    |
| Aumont, Olivier           | Oceanography                                             | IRD-IPSL-LOCEAN                                                  | France                                                     |
| aumtong, suphathida       | MJU lect.                                                | MJU                                                              | Thailand                                                   |
| Aune, Dagfinn             | Associate Professor, Nutritional Epidemiology            | Bjorknes University College                                      | Norway                                                     |

|                         |                                                            |                                                                                                            |                                                   |
|-------------------------|------------------------------------------------------------|------------------------------------------------------------------------------------------------------------|---------------------------------------------------|
| Aurélien, Pascal        | PhD student in Astrophysics                                | Observatoire de Paris                                                                                      | France                                            |
| Aurelle, Didier         | Associate Professor population genetics                    | Aix-Marseille University                                                                                   | France                                            |
| Ausma, Ties             | PhD candidate                                              | University of Groningen                                                                                    | Netherlands (the)                                 |
| Auster, Peter           | Professor Emeritus & Senior Research Scientist             | University of Connecticut & Mystic Aquarium                                                                | United States of America (the)                    |
| Austin, Andy            | Professor, Systematics and Entomology                      | University of Adelaide                                                                                     | Australia                                         |
| Austnes, Kari           | Research Scientist                                         | Norwegian Institute for Water Research                                                                     | Norway                                            |
| austrheim, gunnar       | Prof.                                                      | Norwegian University of Science and Technology,<br>Department of Natural History                           | Norway                                            |
| Autin, Philémon         | PhD in glaciology                                          | IGE                                                                                                        | France                                            |
| Auxietre, Jean-luc      | Expert in geosciences, Deep geothermal Energy              | Engineering and R&D firm                                                                                   | France                                            |
| Auzias, Guillaume       | Researcher                                                 | CNRS, Insitut des Neurosciences de la Timone                                                               | France                                            |
| Avalos, Gerardo         | Professor of Ecology                                       | University of Costa Rica                                                                                   | Costa Rica                                        |
| Avarre, Jean-Christophe | Microbiologist                                             | Institut de Recherche pour le Développement                                                                | France                                            |
| Avella, Ignazio         | PhD Student                                                | University of Porto                                                                                        | Portugal                                          |
| Averbuj, Andres         | Researcher, PhD in Biology                                 | CONICET                                                                                                    | Argentina                                         |
| Avery-Gomm, Stephanie   | PhD student, conservation science                          | University of Queensland                                                                                   | Australia                                         |
| Avila, Luciano Javier   | Principal Researcher CONICET and Director<br>IPEEC=CONICET | IPEEC=CONICET                                                                                              | Argentina                                         |
| Ávila, Julia            | PhD Student                                                | National Institute of Amazonian Research                                                                   | Brazil                                            |
| Ávila, Enrique          | Researcher in Marine Ecology                               | Instituto de Ciencias del Mar y Limnología,<br>Universidad Nacional Autónoma de México                     | Mexico                                            |
| Ávila, Sérgio           | Principal Investigator / Marine (Palaeo)Biogeography       | CIBIO/InBIO, University of the Azores                                                                      | Portugal                                          |
| AVILA GARCIA, DANIELA   | PHD CANDIDATE                                              | UNESCO CHAIR ON SUSTAINABILITY (UPC)                                                                       | Spain                                             |
| Avila-Calero, Sergio    | Evolutionary biology                                       | University of Muenster                                                                                     | Germany                                           |
| Avila-Pires, Teresa     | Biologist                                                  |                                                                                                            | Brazil                                            |
| Avila-Reese, Vladimir   | Full Professor, Astrophysics                               | Instituto de Astronomía, Universidad Nacional<br>Autónoma de México                                        | Mexico                                            |
| Avila-Torres, Ignacio   | Adjunct Professor Comparative Anatomy of<br>Vertebrates    | Universidad Nacional de Asuncion, Facultad de<br>Ciencias Exactas y Naturales, Departamento de<br>Biología | Paraguay                                          |
| Aviles, Amandine        | Biology                                                    |                                                                                                            | France                                            |
| Avilés, Jesús Miguel    | Researcher in Evolutionary Ecology                         | Functional and Evolutionary Ecology Department,<br>Estación Experimental de Zonas Áridas (CSIC)            | Spain                                             |
| Avino, Fabio            | Plasma Physicist                                           |                                                                                                            | Switzerland                                       |
| Aviron, Stéphanie       | Ecologist                                                  |                                                                                                            | France                                            |
| Avlijas, Suncica        | PhD Candidate - Freshwater Ecology                         | McGill University                                                                                          | Canada                                            |
| Avneon, Yoav            | PhD                                                        |                                                                                                            | Israel                                            |
| Avriel-Avni, Noa        | Researcher - Enviromental education                        | Dead Sea and Arava Science Center                                                                          | Israel                                            |
| Avukatov, Vasko         | GIS analyst                                                | Macedonian Ecological Society                                                                              | Macedonia, Republic of (the former<br>Yugoslavia) |
| Awasthi, Aditi          | Research fellow and Bioprocess engineer                    | Indian Institute of Technology Roorkee                                                                     | India                                             |
| Awoyemi, Stephen        | Doctoral Student/Environmental Sciences and Policy         | Central European University                                                                                | Nigeria                                           |

|                          |                                                                        |                                                                     |                                                            |
|--------------------------|------------------------------------------------------------------------|---------------------------------------------------------------------|------------------------------------------------------------|
| Axelrad, Donald          | Associate Professor                                                    | Florida A&M University                                              | United States of America (the)                             |
| Axworthy, Jeremy         | Graduate student, Aquatic and Fishery Sciences                         | University of Washington                                            | United States of America (the)                             |
| Ayala, Pedro             | Assistant Research Professor of medicine                               | Pontificia Universidad Católica de Chile                            | Chile                                                      |
| Ayala, Francisco         | Evolutionary Biologist                                                 |                                                                     | United States of America (the)                             |
| Ayala, Andrea            | PhD Candidate/College of Veterinary Medicine                           | University of Georgia                                               | United States of America (the)                             |
| Ayala Borda, Paola       | PhD student in Biology                                                 | University of Quebec n Chicoutimi                                   | Canada                                                     |
| Ayala-Orozco, Barbara    | Assistant Professor, Sustainability                                    | Institute for Ecosystem and Sustainability Research, UNAM           | Mexico                                                     |
| Ayalon, Ofira            | Prof.                                                                  | University of Haifa & Samuel Neamam Inst., Technion                 | Israel                                                     |
| Ayan, Gökçe              | Postdoctoral researcher in microbial evolutionary biology              | Max Planck Institute for Evolutionary Biology                       | Germany                                                    |
| Ayana, Rajagopal         | Bioinformatics                                                         | KU Leuven                                                           | Belgium                                                    |
| Aydurmus, Didem          | Environmental Politics                                                 |                                                                     | Germany                                                    |
| Ayesa, Javier Alejandro  | Researcher/Natural Resources Assessment                                | Instituto Nacional de Tecnología Agropecuaria                       | Argentina                                                  |
| Ayllón, Daniel           | Postdoc, Ecological modelling                                          | Complutense University of Madrid                                    | Spain                                                      |
| Aytuna, Aydin            | Mathematics                                                            | Middle East Technical University/ Sabancı University                | Turkey                                                     |
| Ayyub, Shreya            | Research Associate                                                     | Newcastle University                                                | United Kingdom of Great Britain and Northern Ireland (the) |
| Azam, Mohd Farooq        | Assistant Professor                                                    | Indian Institute of Technology Indore, India                        | India                                                      |
| Azamor, Luana            | Master in Biodiversity                                                 | Universidade do Estado do Rio de Janeiro (UERJ)                     | Brazil                                                     |
| Azcárate, Francisco M.   | Associate Professor, Ecology                                           | Universidad Autónoma de Madrid, Departamento de Ecología            | Spain                                                      |
| Azcárate Giménez, Carmen | Professor                                                              | Universitat Autònoma Barcelona                                      | Spain                                                      |
| AZCON-BIETO, JOAQUIN     | PLANT PHYSIOLOGY                                                       | UNIVERSITY OF BARCELONA                                             | Spain                                                      |
| Azemar, Frederic         | PhD - Engineer in aquatic ecology                                      | University of Toulouse                                              | France                                                     |
| Aziz, Sheema             | President                                                              | Rimba                                                               | Malaysia                                                   |
| Azizi, Kobra             | Senior Scientist                                                       | Blue World Technologies                                             | Denmark                                                    |
| Azpiazu, Aurora          | Biologist retired                                                      |                                                                     | Spain                                                      |
| B, Peter                 | Postdoctoral Scholar                                                   | University of Kentucky                                              | United States of America (the)                             |
| B. Calegari, Bárbara     | Vertebrate systematics, Research Associate                             | PUCRS                                                               | Brazil                                                     |
| B.Moreira, Ana Paula     | Posdoc researchehr                                                     | UFRJ                                                                | Brazil                                                     |
| Baars, Jan               | Lecturer                                                               | University College Dublin                                           | Ireland                                                    |
| Babik, Wiesław           | Professor of Evolutionary Biology                                      | Jagiellonian University                                             | Poland                                                     |
| Babitsch, Denise         | PhD candidate (River ecosystem management)                             | Senckenberg Research Institute and Natural History Museum Frankfurt | Germany                                                    |
| Babuder, Mareike         |                                                                        | University of Canterbury                                            | New Zealand                                                |
| Babushkin, Aleksandr     | Assistant professor, Chemistry                                         | Volgograd State Technical University                                | Russian Federation (the)                                   |
| Babut, Marc              | ecotoxicologist (senior researcher)                                    | Irstea                                                              | France                                                     |
| Bacchetta, Carla         | Investigador Adjunto                                                   | Instituto Nacional de Limnología                                    | Argentina                                                  |
| Bachelet, Dominique      | Associate Professor, senior research / Climate Change Impacts Modeling | Oregon State University                                             | United States of America (the)                             |
| Bachledová, Stanislava   | Human medician, general practicion                                     | Private clinic, Garmedic s.r.o., Moyzesova 32, Košice               | Slovakia                                                   |

|                                 |                                                                             |                                                                      |                                                            |
|---------------------------------|-----------------------------------------------------------------------------|----------------------------------------------------------------------|------------------------------------------------------------|
| Bachler, Herbert                | Leader, Institut of General Practice                                        | Medical University Innsbruck                                         | Austria                                                    |
| Bachman, Scott                  |                                                                             | NCAR                                                                 | United States of America (the)                             |
| Bachmann, Mona                  | PHD Student                                                                 | Max-Planck-Institute for Evolutionary Anthropology                   | Germany                                                    |
| Bachmann, Stephan               | ingenieur                                                                   | University of Stuttgart                                              | Germany                                                    |
| Bachmann, Michael               | Associate Professor                                                         | Michigan State University                                            | United States of America (the)                             |
| Bachoo, Santosh                 | Senior Marine Ecologist                                                     | Ezemvelo KwaZulu-Natal Wildlife                                      | South Africa                                               |
| Backhaus, Jutta                 | Professor University                                                        | University Bonn                                                      | Germany                                                    |
| Backstrom, Ana                  | Landscape Ecologist                                                         | RMIT University                                                      | Australia                                                  |
| Badalova, Marina                | Head of microbiology department- Industrial biotechnologist                 | ROMB LTD                                                             | Bulgaria                                                   |
| Badeau, Vincent                 | research engineer / ecology                                                 | INRA                                                                 | France                                                     |
| Bader, Alexander                | PhD student in space physics                                                | Lancaster University                                                 | United Kingdom of Great Britain and Northern Ireland (the) |
| Badia, Rudy                     | Ecology Department                                                          | University of Southeast Norway                                       | Norway                                                     |
| Badur, Imke-Marie               | Project Manager Service Learning and Public Engagment in Higher Education   | University of Kassel                                                 | Germany                                                    |
| Bælum, Karoline                 | PhD Geology                                                                 | Svalbars Science Forum                                               | Norway                                                     |
| Baessler, Cornelia              | Scientific Manager Research Unit Ecosystems fo the Future                   | Helmholtz Centre for Environemental Research - UFZ                   | Germany                                                    |
| Baetcke, Lars                   | Energy Technologies                                                         | Helmholtz-Zentrum Hereon                                             | Germany                                                    |
| Baetscher, Kevin                | Ph.D. candidate                                                             | University of Hawaii                                                 | Switzerland                                                |
| Báez Martínez, Rosalina         | Investigador en Ciencias de la Administración                               | Universidad Anáhuac México y Universidad Nacional Autónoma de México | Mexico                                                     |
| Bafica, Andre                   | Associate Professor                                                         | Universidade Federal de Santa Catarina                               | Brazil                                                     |
| Bagarinao, Teodora              | marine biology, aquaculture                                                 | SEAFDEC Aquaculture Department (1978-2016)                           | Philippines (the)                                          |
| Baggio, Rodolfo                 | Tourism digital strategies                                                  | Bocconi University                                                   | Italy                                                      |
| Baggio-Compagnucci, Andrea      | Research Assistant / Ecosystem Services                                     | The James Hutton Institute                                           | United Kingdom of Great Britain and Northern Ireland (the) |
| Bagley, Justin                  | Postdoctoral Research Fellow                                                | University of Missouri-St. Louis                                     | United States of America (the)                             |
| Baglinière, Jean-Luc            | Research Director Ecology of Aquatic Environments                           | French National Institute for Agricultural Research (INRA°           | France                                                     |
| Bagnasco, Marcello              | formerly Full Professor of Internal Medicine - now retired, free consultant | DiMI, University of Genoa                                            | Italy                                                      |
| BAGNERES-URBANY, Anne-Genevieve | Director of research                                                        | Centre National de la Recherche Scientifique (CNRS)                  | France                                                     |
| Bagnis, Arianna                 | Post-doctoral Research Fellow                                               | University of Bologna                                                | Italy                                                      |
| Baguette, Michel                | Professor                                                                   | Museum National d'Histoire Naturelle                                 | France                                                     |
| Bahamonde, Hector               | Plant eco phisiology                                                        |                                                                      | Argentina                                                  |
| Bahls, Peter                    | Executive Director/Fisheries Biologist                                      | Northwest Watershed Institute                                        | United States of America (the)                             |
| Baider, Claudia                 | Curator                                                                     | The Mauritius Herbarium                                              | Mauritius                                                  |
| Baier, Luisa                    | Biomedical Science                                                          | Reutlingen University                                                | Germany                                                    |
| Baier, Florian                  | Postdoctoral Researcher, Synthetic Biology                                  | University of Lausanne                                               | Switzerland                                                |

|                            |                                                           |                                                                   |                                                            |
|----------------------------|-----------------------------------------------------------|-------------------------------------------------------------------|------------------------------------------------------------|
| Baig-Meininghaus, Tariq    | Complex Systems                                           | Max Planck Institute for Dynamics and Selforganization            | Germany                                                    |
| Bailey, Joseph             | Geography Lecturer                                        | York St John University                                           | United Kingdom of Great Britain and Northern Ireland (the) |
| Bailey, Liam               | Post-doctoral Fellow, Climate Change Ecology              | Institute of Zoo and Wildlife Research                            | Germany                                                    |
| Bailey, Dawn               | Founder EcoSea Expeditions / Marine Biology               |                                                                   | United States of America (the)                             |
| Bailey, Zachary            | Postgraduate Student of Evolutionary Biology              | University of Edinburgh                                           | United Kingdom of Great Britain and Northern Ireland (the) |
| Bailleres, Henri           | Adjunct professor                                         | QUT                                                               | Australia                                                  |
| Baillie, Danny             | Research Fellow, Physics                                  | University of Otago                                               | New Zealand                                                |
| Bailoo, Jeremy             | Research Assistant Professor                              | Texas Tech University                                             | United States of America (the)                             |
| Baitz, Heather             | Registered psychologist (PhD)/clinical instructor         | University of British Columbia                                    | Canada                                                     |
| Baji Gal, Arpad            | PhD in Biology/biotechnology                              |                                                                   | Hungary                                                    |
| Bajolet, Flora             | Geologist                                                 | BRGM (French geological survey)                                   | France                                                     |
| Bajomi, Bálint             | PhD candidate, Conservation Biology                       | ELTE, Budapest                                                    | Hungary                                                    |
| Bajrami, Ani               | Researcher/ Anthropology                                  | University of Tirana                                              | Albania                                                    |
| Baker, Phillip             | Research Fellow                                           | Deakin University                                                 | Australia                                                  |
| Baker, Jessica             | Postdoctoral Research Fellow, Forest-climate interactions | University of Leeds                                               | United Kingdom of Great Britain and Northern Ireland (the) |
| Baker, William             | Head of Comparative Plant & Fungal Biology                | Royal Botanic Gardens, Kew                                        | United Kingdom of Great Britain and Northern Ireland (the) |
| Baker, David               | Postdoc / Ecology                                         | Monash University                                                 | Australia                                                  |
| Baker, Maria               | Senior Research Fellow                                    | University of Southampton                                         | United Kingdom of Great Britain and Northern Ireland (the) |
| Baker, Nathan Jay          | PhD candidate (Freshwater ecology)                        | Senckenberg Gesellschaft für Naturforschung                       | Germany                                                    |
| Baker, Eddie               | Division Director, Energy & Materials Processes           | Pacific Northwest National Laboratory (retired)                   | United States of America (the)                             |
| Baker Jr., MD, MS, Richard | Physician / Medicine                                      | St Marys Hospital, Madison, WI                                    | United States of America (the)                             |
| Bakermans, Marja           | Associate Teaching Professor/Ecology                      | Worcester Polytechnic Institute                                   | United States of America (the)                             |
| Bakker, Joke               | Theoretical Biology                                       | University of Groningen                                           | Netherlands (the)                                          |
| Bakker, Elisabeth          | Senior Scientist in Ecology                               | Netherlands Institute of Ecology (NIOO-KNAW)                      | Netherlands (the)                                          |
| Bakwo Fils, Eric Moise     | Senior Lecturer of Conservation Biology                   | Faculty of Sciences; University of Maroua                         | Cameroon                                                   |
| Balabanov, Ivaylo          | Ph.D. student in Immunology                               | Center for Molecular Biology "Severo Ochoa"                       | Spain                                                      |
| Balachandran, Aiyalam      | Joel Dorman Steele Emeritus Professor of Physics          | Syracuse University                                               | United States of America (the)                             |
| Balagurusamy, Nagamani     | Professor, Environmental Biotechnology                    | Facultad de Ciencias Biológicas, Universidad Autónoma de Coahuila | Mexico                                                     |
| Balart, Eduardo            | Senior researcher/marine ecology                          | Centro de Investigaciones Biológicas del Noroeste, S.C.           | Mexico                                                     |
| Balasubramanian, Muniyandi | Assistant Professor, Ecological Economics                 | Institute for Social and Economic Change                          | India                                                      |
| Balbontin, Javier          | Professor                                                 | University of Seville                                             | Spain                                                      |
| Baldasano, Jose M.         | Full Professor of Environmental Engineering.              | Technical University of Catalonia (UPC)                           | Spain                                                      |
| Baldassarre, Daniel        | Assistant Professor of Zoology                            | SUNY Oswego                                                       | United States of America (the)                             |
| Báldi, András              |                                                           | MTA Centre for Ecological Research                                | Hungary                                                    |
| Baldry, Kimberlee          | PhD Student                                               | IMAS, University of Tasmania                                      | Australia                                                  |

|                                   |                                                                                               |                                                                                   |                                                            |
|-----------------------------------|-----------------------------------------------------------------------------------------------|-----------------------------------------------------------------------------------|------------------------------------------------------------|
| Bales, Roger                      | Professor                                                                                     | UC Merced                                                                         | United States of America (the)                             |
| Bales, Chris                      | Professor in Energy Technology                                                                | Dalarna University                                                                | Sweden                                                     |
| BALESDENT, Jerome                 | Directeur de recherche                                                                        | INRA                                                                              | France                                                     |
| Balfour, Dave                     | Ecologist                                                                                     | Independent                                                                       | South Africa                                               |
| Balint, Miklos                    | PI                                                                                            | Senckenberg Biodiversity and Climate Research Centre                              | Germany                                                    |
| Ball, Olivier                     | Lecturer in Ecology and Conservation                                                          | NorthTec                                                                          | New Zealand                                                |
| Ball, Jude                        | PhD candidate, Public Health                                                                  | University of Otago, Wellington                                                   | New Zealand                                                |
| Ballance, Lisa                    | Director Marine Mammal Institute and Professor Fisheries, Wildlife, and Conservation Sciences | Oregon State University                                                           | United States of America (the)                             |
| Ballantyne, Colin                 | Emeritus Professor in Physical Geography                                                      | University of St Andrews                                                          | United Kingdom of Great Britain and Northern Ireland (the) |
| Ballantyne, Gavin                 | Lecturer in Ecology                                                                           | Edinburgh Napier University                                                       | United Kingdom of Great Britain and Northern Ireland (the) |
| Ballerstedt, Hendrik              | Senior Research Scientist                                                                     | RWTH Aachen University, Institute of Applied Microbiology                         | Germany                                                    |
| Ballesteros, Manuel               | University Professor                                                                          | Barcelona University                                                              | Spain                                                      |
| Ballesteros Cánovas, Juan Antonio | Senior Researcher                                                                             | Spanish Research Council                                                          | Spain                                                      |
| Balling, Meghan                   | Marine Biologist                                                                              | NOAA                                                                              | United States of America (the)                             |
| Ballot, Andreas                   | Senior Scientist                                                                              | Norwegian Institute for Water Research                                            | Norway                                                     |
| BALLOT, BARBARA                   | Ingénieur agro-alimentaire                                                                    |                                                                                   | France                                                     |
| BALLOU, Rafik                     | Research Director - Physics                                                                   | Insitut Néel - CNRS                                                               | France                                                     |
| Balma, Giovanni A.C.              | Ichthyology                                                                                   | Museo Civico di Storia Naturale di Carmagnola                                     | Italy                                                      |
| Balmer, Jennifer                  | Assistant Professor                                                                           | The Citadel                                                                       | United States of America (the)                             |
| Balmonte, John Paul               | Aquatic Microbial Ecologist and Biogeochemist                                                 | Uppsala University                                                                | Sweden                                                     |
| Balogh, Lajos                     | head / botanist                                                                               | Savaria Museum, Natural History Department                                        | Hungary                                                    |
| Balvino-Olvera, Francisco         | PhD Student                                                                                   | ENES UNAM-Morelia                                                                 | Mexico                                                     |
| Balys, Vaidas                     |                                                                                               | NGO "Baltijos vilkas"                                                             | Lithuania                                                  |
| balzeau, antoine                  | Research Director                                                                             | CNRS and Muséum national d'Histoire naturelle                                     | France                                                     |
| Bamberg, Bob                      | Geology PhD researcher                                                                        | University of Leicester                                                           | United Kingdom of Great Britain and Northern Ireland (the) |
| Bañares, Guillermo                | PhD candidate                                                                                 | Universidad Rey Juan Carlos                                                       | Spain                                                      |
| Banasik, Kazimierz                | Professor                                                                                     | Warsaw University of Life Sciences - SGGW, Institute of Environmental Engineering | Poland                                                     |
| Banchs-Piqué, Miquel              | PhD student (civil engineering)                                                               | University of Portsmouth                                                          | United Kingdom of Great Britain and Northern Ireland (the) |
| Bancila, Raluca Ioana             | Researcher                                                                                    | ISER                                                                              | Romania                                                    |
| Bandelj, Vinko                    | Researcher                                                                                    | OGS - Istituto Nazionale di Oceanografia e di Geofisica Sperimentale              | Italy                                                      |
| Bandopadhyay, Subhajit            | PhD in Remote Sensing                                                                         | Poznan University of Life Sciences                                                | Poland                                                     |
| Banham, Penny                     | Conservation Scientist                                                                        | Born Free Foundation                                                              | United Kingdom of Great Britain and Northern Ireland (the) |

|                               |                                                                           |                                                                                 |                                                               |
|-------------------------------|---------------------------------------------------------------------------|---------------------------------------------------------------------------------|---------------------------------------------------------------|
| Baniel, Alice                 | postdoctoral researcher in evolutionary biology                           | Stony Brook University                                                          | United States of America (the)                                |
| Bank, Michael                 | Senior Scientist                                                          | Institute of Marine Research                                                    | Norway                                                        |
| Banks, Andrew Clive           | Principal Research Scientist Earth Observation/<br>Satellite Oceanography | Institute of Oceanography, Hellenic Centre for Marine<br>Research (HCMR)        | Greece                                                        |
| banlaki, imre                 | Researcher Synthetic Biology                                              | University of Lausanne                                                          | Switzerland                                                   |
| Bannerman, J.E.               | Medical Botanist /Applied Ecologist                                       | Shadetree Institute                                                             | United States of America (the)                                |
| Bannitz-Fernandes, Renata     | CRO                                                                       | BIOBREYER                                                                       | Brazil                                                        |
| Baños-Páez, Pedro             | Sociologist                                                               | University of Murcia                                                            | Spain                                                         |
| Bansept Basler, Pauline       | Plant breeder                                                             | Baver Crop Science                                                              | France                                                        |
| Bañuelos, Maria-Jose          | Researcher (Post-Doc)                                                     | University of Oviedo                                                            | Spain                                                         |
| Banza, Paula                  | PhD Student                                                               | University of Évora                                                             | Portugal                                                      |
| Banzhaf, Wolfgang             | Koza Chair in Genetic Programming, Computer<br>Science and Engineering    | Michigan State University                                                       | United States of America (the)                                |
| bao, yanan                    | phd student                                                               | ocean university of china                                                       | China                                                         |
| BAQUE, DAVID                  | Ingeneer Geochemistry Heavy metals in environment                         | CNRS ECOLAB                                                                     | France                                                        |
| Baquero, Enrique              | Professor                                                                 | Universidad de Navarra                                                          | Spain                                                         |
| Baquero Larriva, María Teresa | PhD student in Urban Regeneration and Sustainability                      | Polytechnic University of Madrid                                                | Spain                                                         |
| Bar Yosef, Anne               | Specialist Critical Care Medicine                                         | Charité Universitätsklinikum Berlin                                             | Germany                                                       |
| Baragatti, Meili              | Statistics                                                                | Montpellier SupAgro                                                             | France                                                        |
| Barák, Imrich                 | Head of Department of Microbial Genetics                                  | Institute of Molecular Biology, Slovak Academy of<br>Sciences                   | Slovakia                                                      |
| baraldi, cecilia              | PhD                                                                       | university of modena                                                            | Italy                                                         |
| Baraldi, Cecilia              | PhD                                                                       | Università di Modena e Reggio E.                                                | Italy                                                         |
| Baran, Brygida                | Mgr/Phd student                                                           | Centre of New Technologies University of Warsaw                                 | Poland                                                        |
| Barantal, Sandra              | Postdoctoral researcher (Plant-Soil Ecology)                              | CNRS                                                                            | France                                                        |
| Barata, Carolina              | PhD Student in Biology                                                    | University of St Andrews                                                        | United Kingdom of Great Britain<br>and Northern Ireland (the) |
| Baratta, Philippe             | PhD student                                                               | CPPM - CPT - CNRS - Aix-Marseille université                                    | France                                                        |
| Barausse, Alberto             | Researcher                                                                | University of Padova                                                            | Italy                                                         |
| Barbarics, Boris              | Medicine                                                                  | University Medicine Goettingen                                                  | Germany                                                       |
| Barbe, Lou                    | Assistant Professor in Ecology                                            | University of Rennes 1                                                          | France                                                        |
| Barber, Patrick               | Assistant Professor of Chemistry                                          | Earlham College                                                                 | United States of America (the)                                |
| Barber-James, Helen           | Freshwater Biologist                                                      | Albany Museum                                                                   | South Africa                                                  |
| Barberi, Paolo                | Professor in Agronomy and Field Crops                                     | Group of Agroecology, Institute of Life Sciences,<br>Scuola Superiore Sant'Anna | Italy                                                         |
| Barberis, Marta               | PhD Student                                                               | Università di Bologna                                                           | Italy                                                         |
| Barbero, Albane               | PhD Student                                                               | Institut of Geosciences of the Environnement - CNRS -<br>UGA                    | France                                                        |
| Barbero palacios, Laura       | Conservationist biologist                                                 | Universitat Autònoma de Barcelona                                               | Spain                                                         |
| Barbezat, Gil                 | Emeritus Professor of Medicine, Gastroenterologist                        | University of Otago                                                             | New Zealand                                                   |
| Barbi Seleguim, Fabiana       | Post doctoral researcher                                                  | Nepam Unicamp University of Campinas                                            | Brazil                                                        |
| Barbier, Samuel               | Ph.D. Geology                                                             | University Lyon 1 Claude Bernard                                                | France                                                        |

|                          |                                                                  |                                                                                                  |                                |
|--------------------------|------------------------------------------------------------------|--------------------------------------------------------------------------------------------------|--------------------------------|
| BARBIER, Içvara          | phd student in synthetic biology                                 | University of Lausanne                                                                           | Switzerland                    |
| Barbieri, José Carlos    | Professor                                                        | FGV/EAESP -                                                                                      | Brazil                         |
| BARBIERO, Laurent        | Soil Scientist                                                   | IRD                                                                                              | France                         |
| Barbini, Santiago        | Research, Dr - Biology and conservation of chondrichthyan fishes | Instituto de Investigaciones Marinas y Costeras (IIMyC, CONICET-UNMdP), Mar del Plata, Argentina | Argentina                      |
| Barbosa, A. Márcia       |                                                                  | Biogeography Consulting & Training                                                               | Portugal                       |
| Barbosa, Catia F         | Professor of Geochemistry                                        | Universidade Federal Fluminense (UFF)                                                            | Brazil                         |
| BARBOSA, ANDRES          | SENIOR SCIENTIST                                                 | MUSEO NACIONAL DE CIENCIAS NATURALES                                                             | Spain                          |
| Barbosa Fontana, Rodrigo | PhD student in Ecology                                           | Universidade Federal do Rio Grande do Sul                                                        | Brazil                         |
| Barbraud, Christophe     | Researcher, population ecology                                   | CNRS                                                                                             | France                         |
| Barcellos, Christovam    | Senior researcher                                                | Oswaldo Cruz Foundation                                                                          | Brazil                         |
| Barcelo-Serra, Margarida | Postdoctoral Researcher in behavioral ecology                    | IMEDEA                                                                                           | Spain                          |
| Barcelos, Daniele        | MSc Ecology                                                      | Instituto de Desenvolvimento Sustentável Mamirauá                                                | Brazil                         |
| Barclay, Robert          | Professor                                                        | University of Calgary                                                                            | Canada                         |
| Barenton, Bruno          | Scientist, retired                                               | INRA                                                                                             | France                         |
| baret, Frederic          | directeur de recherches                                          | INRAE                                                                                            | France                         |
| Barfod, Anders           | Professor                                                        | Aarhus University                                                                                | Denmark                        |
| Barga, Sarah             | Plant Ecologist                                                  |                                                                                                  | United States of America (the) |
| Bargagli, Roberto        | Professor of Ecology                                             | University of Siena                                                                              | Italy                          |
| Bargaje, Rhishikesh      | Scientist                                                        |                                                                                                  | United States of America (the) |
| Bargheer, Till           |                                                                  | Hannover University                                                                              | Germany                        |
| Bargielowski, Irka       | Research scientist, mosquito ecology and genomics                | UC Davis                                                                                         | United States of America (the) |
| Bark, Glenn              | Senior Lecturer/Assistant Professor in Geology                   | Luleå University of Technology                                                                   | Sweden                         |
| Barkan, N.Pinar          | Postdoctoral fellow                                              | University of Lausanne                                                                           | Switzerland                    |
| Barker, Brent            | Teaching Support Manager, Astronomy and Geoscience               | University of Chicago                                                                            | United States of America (the) |
| Barker, Fiona            | Research Fellow                                                  | Monash University                                                                                | Australia                      |
| Barker, James Stuart     | Emeritus Professor                                               | University of New England                                                                        | Australia                      |
| Barki, Assaf             |                                                                  | Department of Aquaculture, Volcani Institute                                                     | Israel                         |
| Barlow, Craig            | Engineer                                                         |                                                                                                  | Finland                        |
| Barmark, Mimmi           | Associate professor in Sociology                                 | Lund University                                                                                  | Sweden                         |
| Barnard, Malcolm         | PhD Student, Marine Sciences                                     | University of North Carolina - Chapel Hill Institute of Marine Sciences                          | United States of America (the) |
| Barner, Lida             | Cultural Anthropologist, M.Sc. student cognitive science         | University of Osnabrück                                                                          | Germany                        |
| Barnes, Andrew           | Marine microbiology/immunology                                   | The University of Queensland                                                                     | Australia                      |
| Barnett, Leonie          | Lecturer (Biology)                                               | Central Queensland University                                                                    | Australia                      |
| Baró, Francesc           | Postdoctoral researcher                                          | ICTA-UAB                                                                                         | Spain                          |
| Barocas, Adi             | Postdoctoral Associate                                           | San Diego Zoo's Institute for conservation Research                                              | United States of America (the) |
| Baron, Alexandre         | PhD Student in Atmospheric Physics                               | LSCE-IPSL                                                                                        | France                         |
| Baron, Harald            | Researcher, Institute of Spatial Planning                        | Vienna University of Technology                                                                  | Austria                        |



|                               |                                                             |                                                                        |                                                            |
|-------------------------------|-------------------------------------------------------------|------------------------------------------------------------------------|------------------------------------------------------------|
| Baronio, Gudryan Jackson      | Post-doc researchers                                        | Universidade Federal dos Vales do Jequitinhonha e Mucuri               | Brazil                                                     |
| Barot, Sébastien              | Ecology                                                     | IRD                                                                    | France                                                     |
| Barouillet, Cecilia           | PhD Candidate Biology                                       | Queen's University                                                     | Canada                                                     |
| BarOz, Guy                    | Bio-archaeology                                             | University of Haifa, Department of Archaeology                         | Israel                                                     |
| Barquez, Ruben                | Professor                                                   | University of Tucuman                                                  | Argentina                                                  |
| Barr, Genevieve               | PhD student - Retrovirology                                 |                                                                        | United Kingdom of Great Britain and Northern Ireland (the) |
| Barracrough, Rosemary         | Research Assistant//Research Associate                      | Massey University//Field Museum & Auckland Museum                      | New Zealand                                                |
| Barradas, Victor              | Senior Researcher/Ecology and Environmental Sciences        | Instituto de Ecologia, Universidad Nacional Autonoma de Mexico         | Mexico                                                     |
| Barrado Navascues, David      | Full Professor Astrophysics                                 | Instituto Nacional de Técnica Aeroespacial                             | Spain                                                      |
| Barras, Hélène                | PhD Student                                                 | University of Bern                                                     | Switzerland                                                |
| Barrat, Jean-Alix             | Professor of Geochemistry                                   | Institut Universitaire Européen de la Mer (IUEM), Plouzané             | France                                                     |
| Barratt, Chris                | Postdoctoral Researcher                                     | German Centre for Integrative Biodiversity Research Halle-Jena-Leipzig | Germany                                                    |
| Barratt, Barbara              | Principal Scientist                                         | AgResearch Ltd                                                         | New Zealand                                                |
| Barre, Kirsten                | scientific assistant educational sciences                   | Hochschule für Angewandte Wissenschaften Hamburg                       | Germany                                                    |
| Barrena de los Santos, Carmen | Postdoctoral researcher                                     | Centre of Marine Sciences of Algarve                                   | Portugal                                                   |
| Barrera, Alessandra           | Associate Professor of Biology                              | Georgia Gwinnett College                                               | United States of America (the)                             |
| Barrera-Alba, Jose Juan       | Full Professor                                              | Institute of Marine Science - Universidade Federal de São Paulo        | Brazil                                                     |
| Barrett, Rowan                | Associate Professor                                         | McGill University                                                      | Canada                                                     |
| Barrett, Spencer              | University Professor Emeritus                               | University of Toronto                                                  | Canada                                                     |
| Barrett, Eamonn               | Director; Environmental and Sustainability Consultant       | EB International Consulting Limited                                    | United Kingdom of Great Britain and Northern Ireland (the) |
| Barrett, Peter                | Emeritus Professor of Geology                               | Victoria University of Wellington                                      | New Zealand                                                |
| Barrett, Louise               | Canada Research Chair in Cognition, Evolution and Behaviour | University of Lethbridge                                               | Canada                                                     |
| Barrett, David                | Research Associate                                          | University of Calgary                                                  | Canada                                                     |
| Barrett, Paul                 | Researcher                                                  | Natural History Museum                                                 | United Kingdom of Great Britain and Northern Ireland (the) |
| Barrientos-Diaz, Ossman       | Phd candidate in Genetics and Molecular Biology             | Universidade Federal do Rio Grande do Sul                              | Brazil                                                     |
| Barriga, Alejandro            | Postdoctoral researcher in Biochemistry                     | Complutense University of Madrid                                       | Spain                                                      |
| Barriga Bahamonde, Cecilia    | PhD candidate, Environmental Science and Policy             | George Mason University                                                | Peru                                                       |
| Barrios, Sara                 | Conservation Partnership Coordinator                        | Royal Botanic Gardens Kew                                              | United Kingdom of Great Britain and Northern Ireland (the) |
| Barron, Douglas               | Assistant Professor of Biology                              | Arkansas Tech University                                               | United States of America (the)                             |
| Barros, Piedade               | Professor/ researcher                                       | School of Health Porto Polytechnic                                     | Portugal                                                   |
| Barros, Nathan                | professor                                                   | Federal University of Juiz de Fora                                     | Brazil                                                     |
| Barroso Ramos Neto, Mario     | LULUC Monitoring Specialist                                 | TNC                                                                    | Brazil                                                     |

|                         |                                                             |                                                                             |                                                            |
|-------------------------|-------------------------------------------------------------|-----------------------------------------------------------------------------|------------------------------------------------------------|
| Barry, David            |                                                             | Francis Crick Institute                                                     | United Kingdom of Great Britain and Northern Ireland (the) |
| Barry, Michael          | Associate Scientist, Department of Neuroscience             | Ichan School of Medicine at Mount Sinai                                     | United States of America (the)                             |
| Barry, John             | Professor of Green Political Economy                        | Queen's University Belfast                                                  | United Kingdom of Great Britain and Northern Ireland (the) |
| Barry, Paul             | Lecturer, Computing and Data Science                        | Institute of Technology, Carlow                                             | Ireland                                                    |
| Barshis, Daniel         | PhD Zoology                                                 | Old Dominion University                                                     | United States of America (the)                             |
| Barsoum, Mark           | Asst. Professor, Biology                                    | Davidson College                                                            | United States of America (the)                             |
| Bart, Sylvain           | Postdoctoral Research Associate                             | University of York                                                          | United Kingdom of Great Britain and Northern Ireland (the) |
| Bartelt, Paul           | Professor of Biology                                        | Waldorf University                                                          | United States of America (the)                             |
| Bartelt-Kirbach, Britta | Postdoctoral researcher                                     | Institute of Anatomy and Cell Biology, University of Ulm                    | Germany                                                    |
| Bartha, Sandor          | Senior Scientist, ecologist                                 | MTA Centre for Ecological Research                                          | Hungary                                                    |
| Barthe, Franck          | Professor of Mathematics                                    | Université Toulouse III                                                     | France                                                     |
| Barthel, Leon           | Scientist in Ecology                                        |                                                                             | Germany                                                    |
| Barthel, Dana           | Psychology                                                  | University Medical Center Hamburg                                           | Germany                                                    |
| Barthel, Stephan        | Senior Lecturer                                             | University of Gävle                                                         | Sweden                                                     |
| Barthelemy, Frederic    | Neurosciences                                               | Forschungszentrum Jülich                                                    | France                                                     |
| Bartholomew, Jerri      | Professor of Microbiology                                   | Oregon State University                                                     | United States of America (the)                             |
| Barti, Benjamin         | Research Scientist (Neuroscience)                           | Indiana University                                                          | United States of America (the)                             |
| Bartlett, Randal        | Interagency Coordinator, Hawaii Invasive Species Council    | Research Corporation of the University of Hawaii                            | United States of America (the)                             |
| Bartlett, Madelaine     | Assistant Professor, Biology                                | University of Massachusetts Amherst                                         | United States of America (the)                             |
| Bartolucci, Matteo      | Master student of Applied Critical Archaeology and Heritage | Alma Mater Studiorum - University of Bologna                                | Italy                                                      |
| Bartomeus, Ignasi       | Researcher                                                  | EBD-CSIC                                                                    | Spain                                                      |
| Barton, Andrew          | Professor of Biology                                        | University of Maine at Farmington                                           | United States of America (the)                             |
| Barton, Nicholas        | Professor, evolutionary genetics                            | IST Austria                                                                 | Austria                                                    |
| Barton, Brandon         | Assistant professor                                         | Mississippi State University                                                | United States of America (the)                             |
| Bartoń, Kamil           | Assistant professor, ecology                                | Institute of Nature Conservation, Polish Academy of Sciences                | Poland                                                     |
| Bartram, Deborah        | Environmental Engineer                                      |                                                                             | United States of America (the)                             |
| Baruzzi, Agostino       | Full Professor of Neurology                                 | Alma Mater Studiorum-Bologna University                                     | Italy                                                      |
| Barzanti, Paola         | Statistician                                                | Istituto Zooprofilattico Sperimentale del Piemonte, Liguria e Valle d'Aosta | Italy                                                      |
| Bas, Maria              | PhD Student in Biological Sciences                          | Centro Austral de Investigaciones Científicas (CADIC-CONICET)               | Argentina                                                  |
| Bas, Yves               | Researcher                                                  | CESCO - MNHN                                                                | France                                                     |
| Basaguren, Ana          | Lecturer of Ecology                                         | University of the Basque Country UPV/EHU                                    | Spain                                                      |
| Basei, Fernanda Luisa   | Postdoc                                                     | UNICAMP                                                                     | Brazil                                                     |
| Basellini, Ugofilippo   | PhD student, demography                                     | Institut national d' études démographiques (INED)                           | France                                                     |

|                       |                                                                  |                                                       |                                                            |
|-----------------------|------------------------------------------------------------------|-------------------------------------------------------|------------------------------------------------------------|
| Baskett, Carina       | Postdoctoral Researcher, Ecology and Evolutionary Biology        | Institute of Science and Technology-Austria           | Austria                                                    |
| Baskin, Tobias        | Professor of Biology                                             | University of Massachusetts Amherst                   | United States of America (the)                             |
| Bass, Sarah           | Lecturer                                                         | University of Plymouth                                | United Kingdom of Great Britain and Northern Ireland (the) |
| Bassaglia, Yann       | MCF cell biology                                                 | MNHN                                                  | France                                                     |
| Bassat, Quique        | ICREA Research Professor                                         | Barcelona Institute for Global Health (ISGlobal)      | Spain                                                      |
| Basse, Alexander      |                                                                  | University of Kassel                                  | Germany                                                    |
| Bassham, Susan        | Academic scientist in biology                                    | University of Oregon                                  | United States of America (the)                             |
| Bassiouni, Maoya      | PhD Student, Water Resources Engineering                         | Oregon State University                               | United States of America (the)                             |
| Basso, Néstor         | Researcher, Director                                             | IDEAUS-CONICET                                        | Argentina                                                  |
| Basso, Veronica       | PhD student in Agricultural Sciences                             | INRA Grand-Est Nancy                                  | France                                                     |
| Bassos-Hull, Kim      | Senior Biologist/Marine Biology                                  | Mote Marine Laboratory                                | United States of America (the)                             |
| Bastazini, Vinicius   | Ecology                                                          |                                                       | France                                                     |
| Bastian, Frederic     | Computational biology                                            | SIB Swiss Institute of Bioinformatics                 | Switzerland                                                |
| Bastian, Anna         | Evolutionar Biologists                                           | University of KwaZaule-Natal                          | South Africa                                               |
| BASTIAN, Suzanne      | Associate Professor Ecology and Infectious Diseases              | Oniris/INRA                                           | France                                                     |
| Bastide, Héloïse      | Associate Professor                                              | Université Paris-Saclay                               | France                                                     |
| Bastin, Jean Francois | Ecologist                                                        | ETH-Zurich                                            | Switzerland                                                |
| Bastos, Ana           | Scientific Researcher                                            | Dept. of Geography, Ludwig-Maximilians University     | Germany                                                    |
| Bataille, Gwennaël    | Evolutionary ecology                                             | UCLouvain                                             | Belgium                                                    |
| Batary, Peter         | Head of Landscape and Conservation Ecology Group                 | MTA Centre for Ecological Research                    | Hungary                                                    |
| Batavia, Chelsea      | Post-doctoral researcher                                         | Oregon State University                               | United States of America (the)                             |
| Batelaan, Okke        | Professor Hydro(geo)logy                                         | Flinders University, Adelaide                         | Australia                                                  |
| Bateman, Craig        | Postdoctoral researcher in Forest Entomology                     | University of Florida                                 | United States of America (the)                             |
| Bateman, Brooke       | Senior Scientist, Climate; Climate Ecologist                     | National Audubon Society                              | United States of America (the)                             |
| Batenburg, Anneke     | postdoc in atmospheric chemistry                                 | MPI-C Mainz                                           | Germany                                                    |
| Bates, Amanda         | Associate Professor                                              | Memorial University                                   | Canada                                                     |
| Bates, Margaret       | Professor of Sustainable Wastes Management                       | The University of Northampton                         | United Kingdom of Great Britain and Northern Ireland (the) |
| Bateson, Mathilde     | Phd Candidate in Artificial Intelligence                         | ecole de technologie supérieure, montreal             | Canada                                                     |
| Batil, Tobias         | Bioinformatics                                                   | University of Exeter                                  | United Kingdom of Great Britain and Northern Ireland (the) |
| Batista, Natasha      | Research Associate, Interdisciplinary Environmental Science      | Stanford University                                   | United States of America (the)                             |
| Batista, Silara       | PhD candidate                                                    | Universidade estadual "Júlio de Mesquita Filho"-UNESP | Brazil                                                     |
| BATISTA, KARINA       | Scientific Researcher VI                                         | Instituto de Zootecnia/ SAASP                         | Brazil                                                     |
| Batjes, Niels H.      | Senior Soil Scientist / Co-ordinator World Data Centre for Soils | ISRIC - World Soil Information                        | Netherlands (the)                                          |
| Battillo, Jenna       | Palynologist/Archaeobotanist                                     | PaleoResearch Institute                               | United States of America (the)                             |

|                         |                                                                   |                                                                                          |                                |
|-------------------------|-------------------------------------------------------------------|------------------------------------------------------------------------------------------|--------------------------------|
| Batzdorf, Clara         | medical PhD-student                                               | Institute for medical Immunology at the Charité<br>Universitätsmedizin Berlin            | Germany                        |
| Bauch, Christina        | Postdoctoral researcher / Evolutionary Biology                    | University of Groningen                                                                  | Netherlands (the)              |
| Bauch, Simone           | Consultant on climate change and land use                         |                                                                                          | Brazil                         |
| Baudement, Cécile       | Hydrogeologist                                                    | Geological French Survey                                                                 | France                         |
| Baudin, Emmanuel        | Assistant professor                                               | Ecole Normale Supérieure                                                                 | France                         |
| Baudin, Mael            | Postdoc - Plant Biology                                           | UC Berkeley                                                                              | United States of America (the) |
| Baudoin, Michael        | Professor in physics                                              | Université de Lille                                                                      | France                         |
| Baudouin, Anne          | research ingeneer, chemistry                                      | CNRS                                                                                     | France                         |
| Baudraz, Maude          | PhD candidate, Zoology                                            | Trinity College Dublin                                                                   | Ireland                        |
| Baudrier, Jérôme        | Marine Environment                                                | Ifremer                                                                                  | France                         |
| Baudry, Jacques         | senior scientist in landscape ecology                             | National Institute for Agronomic Research                                                | France                         |
| Baudry, Emmanuelle      | Professor in ecology                                              | University Paris Sud                                                                     | France                         |
| Baudson, Tanja Gabriele | Postdoctoral Researcher                                           | University of Luxembourg                                                                 | Luxembourg                     |
| Bauer, Hans             | Wildlife Conservation Scientist                                   | University of Oxford                                                                     | Netherlands (the)              |
| Bauer, Franz            | Renewable Energies                                                | OTH Regensburg                                                                           | Germany                        |
| Bauer, Hanna            | Graduate Student                                                  | Louisiana State University                                                               | United States of America (the) |
| Bauer, Manfred          | Head of Customer Service Tyrol and Vorarlberg                     | ZAMG - Zentralanstalt fuer Meteorologie und<br>Geodynamik                                | Austria                        |
| Bauer, Eugen            | Postdoctoral Researcher                                           | Institute of Organismic and Molecular Evolution,<br>University of Mainz                  | Germany                        |
| Bauer, Arthur           | Post-doctorate                                                    | Universidade Federal do Rio de Janeiro                                                   | Brazil                         |
| Bauer, Florian          | Researcher                                                        | Technical University of Munich                                                           | Germany                        |
| Bauer, Yannik           | PhD candidate, Computational Vision Neuroscience                  | Ludwig-Maximilians-University (LMU) Munich                                               | Germany                        |
| Bauhus, Jürgen          | Profesor of Silviculture                                          | University of Freiburg                                                                   | Germany                        |
| Baum, Daniel            | Senior scientist/group leader in Computer Science                 | Zuse Institute Berlin                                                                    | Germany                        |
| Baum, Michael           | postdoc in science teacher education                              | Christian-Albrechts-Universität Kiel                                                     | Germany                        |
| Baumann, Matthias       | Researcher                                                        | Humboldt-Universität zu Berlin                                                           | Germany                        |
| Baumann, Nathalie       | Urban Ecologist, Senior Lecturer and Consultant                   | Zurich University of Applied sciences, Institute of<br>environment and natural resources | Switzerland                    |
| Baumann, Franz          | Visiting Research Professor                                       | New York University                                                                      | United States of America (the) |
| Baumann, Sabine         | Cryosphere                                                        |                                                                                          | Germany                        |
| Baumbach, Dustin        | PhD Candidate in Biology                                          | Loma Linda University                                                                    | United States of America (the) |
| Baumeister, Stefan      | Post-Doctoral Researcher in Corporate Environmental<br>Management | University of Jyväskylä, School of Business and<br>Economics                             | Finland                        |
| Baumel, Alex            | lecturer and researcher in plant ecology and evolution            | Aix Marseille University                                                                 | France                         |
| Baumgarten, Simon       | Wissenschaftlicher Mitarbeiter                                    | Fraunhofer-Gesellschaft                                                                  | Germany                        |
| Baumgarten, Frederik    | Postdoc in Ecology                                                | University of British Columbia                                                           | Canada                         |
| Baumgartner, Amato      | Sustainability Economist                                          |                                                                                          | Germany                        |
| Baur, Julian            | PhD candidate, Evolutionary biology                               | University of Uppsala                                                                    | Sweden                         |
| BAURAIN, Denis          | Associate Professor / Bioinformatics and<br>Phylogenomics         | University of Liège                                                                      | Belgium                        |

|                         |                                                                   |                                                                         |                                                            |
|-------------------------|-------------------------------------------------------------------|-------------------------------------------------------------------------|------------------------------------------------------------|
| Bausch, Anika           | University Assistant, PhD Student Organisational Communication    | University of Klagenfurt                                                | Austria                                                    |
| Bautista, Carlos        | Research assistant                                                | Institute of Nature Conservation of the Polish Academy of Science (PAN) | Poland                                                     |
| Bax, Narissa            | Marine scientist                                                  | Tasmanian Museum and Art Gallery                                        | Australia                                                  |
| Bax, Gerhard            | Prof.Dr. Earth Science & ICT4D                                    | Inter-University Council for East Africa                                | Uganda                                                     |
| Baxter, Sandra          | Engagement Fellow                                                 | UKFIET                                                                  | United Kingdom of Great Britain and Northern Ireland (the) |
| Baxter, Colden          | Professor of Freshwater Ecology                                   | Idaho State University                                                  | United States of America (the)                             |
| Bayal, Nitin            | Senior Research Fellow, DBT                                       | National Centre for Cell Science, Pune                                  | India                                                      |
| Bayala, Jules           | Principal Scientist - Sahel Ecosystems                            | World Agroforestry                                                      | Mali                                                       |
| Bayet, Laurie           | Assistant Professor                                               | American University                                                     | United States of America (the)                             |
| Baylis, Matthew         | Professor of Veterinary Epidemiology                              | University of Liverpool                                                 | United Kingdom of Great Britain and Northern Ireland (the) |
| Bayly, Nick             | Migratory Species Manager                                         | SELVA                                                                   | Colombia                                                   |
| Bayraktarov, Elisa      | Postdoctoral Research Fellow, Conservation Biology                |                                                                         | Australia                                                  |
| Bazan, Soledad          | Professional Assistant in biophysics                              | CONICET                                                                 | Argentina                                                  |
| Bazié, Hugues Roméo     | lecturer-researcher in agroforestry and plant Ecophysiology       | University of Ouagadougou                                               | Burkina Faso                                               |
| Bazin, Jeremie          | Biology researcher                                                | CNRS                                                                    | France                                                     |
| Beadle, Luann           | Senior Environmental Scientist                                    | Private Consultant                                                      | United States of America (the)                             |
| Beadle, Nicole          | Wildlife biologist                                                | Consultant                                                              | United States of America (the)                             |
| Beadle, Douglas         | Principal Environmental Scientist - Retired                       | Consulting                                                              | United States of America (the)                             |
| Beakes, Kerry           | Lecturer / public health nutrition                                | Endeavour College of Natural Health                                     | Australia                                                  |
| Bean, Nina              | Master's student in physiological ecology of tropical reef corals | California State University, Northridge                                 | United States of America (the)                             |
| Bearzi, Maddalena       | President                                                         | Ocean Conservation Society                                              | United States of America (the)                             |
| Bearzi, Giovanni        | President                                                         | Dolphin Biology and Conservation                                        | Italy                                                      |
| Beasley, Colin Robert   | Professor Titular - Aquatic ecology                               | Universidade Federal do Pará                                            | Brazil                                                     |
| Beattie, Andrew         | Emeritus Professor                                                | Macquarie University                                                    | Australia                                                  |
| Beaud, Flavien          | Postdoctoral fellow, in glaciology and glacial geomorphology      | California Institute of Technology                                      | United States of America (the)                             |
| Beaufore, Lucas         | Physics Graduate Student                                          | University of Chicago                                                   | United States of America (the)                             |
| Beaufort, Luc           | Senior Scientist, in Paleoceanography and Oceanography            | CNRS                                                                    | France                                                     |
| Beauge, Cristian        | Full Professor                                                    | Univseridad Nacional de Cordoba                                         | Argentina                                                  |
| Beaune, David           | Biologist.                                                        | Université de Bourgogne Franche Comté                                   | France                                                     |
| Beaunée, Gael           | Researcher in epidemiology, PhD                                   | INRA                                                                    | France                                                     |
| Beauregard, Pascale     | Associate Professor, Microbiology                                 | Université de Sherbrooke                                                | Canada                                                     |
| Beaurepaire, Alexis     | postdoc                                                           | University of Bern                                                      | Switzerland                                                |
| Beauvais, Simon-Gabriel | Astronomy                                                         | Université de Montréal                                                  | Canada                                                     |
| Beaver, Katy            | Biology                                                           |                                                                         | Seychelles                                                 |

|                                  |                                                               |                                                              |                                                            |
|----------------------------------|---------------------------------------------------------------|--------------------------------------------------------------|------------------------------------------------------------|
| Beazley, Karen                   | Professor                                                     | Dalhousie University                                         | Canada                                                     |
| Bebas, Piotr                     | Professor/Biology                                             | University of Warsaw                                         | Poland                                                     |
| Bebbington, Kat                  | Postdoctoral researcher/evolutionary ecology                  | The University of Groningen                                  | Netherlands (the)                                          |
| Bebej, Ryan                      | Associate Professor of Biology                                | Calvin University                                            | United States of America (the)                             |
| Beccaloni, George                | Entomologist/evolutionary biologist/historian of science      | The Charles Darwin Trust                                     | United Kingdom of Great Britain and Northern Ireland (the) |
| Becciu, Paolo                    | PhD student                                                   | University of Haifa                                          | Israel                                                     |
| Becerra, Alejandra G.            | Researcher-Professor-Mycologist                               | IMBIV-UNC                                                    | Argentina                                                  |
| BECERRA, Sylvia                  | Researcher -Sociologist                                       | CNRS                                                         | France                                                     |
| Becerra Rondón, Adriana Coromoto | PhD Student in Remote Sensing                                 | Universidade Federal do Rio Grande do Sul                    | Venezuela (Bolivarian Republic of)                         |
| Bechara, Fernando                | Professor, Tropical Forest Restoration                        | Federal University of Technology - Paraná                    | Brazil                                                     |
| Bechtel, Timothy                 | Professor of Geoscience                                       | Franklin & Marshall College                                  | United States of America (the)                             |
| Beck, Kathryn                    | Botanist                                                      |                                                              | United States of America (the)                             |
| Beck, Kristina                   | Postdoc in animal ecology                                     | Senckenberg Biodiversity and Climate Research Centre         | Germany                                                    |
| becker, stan                     | Professor (emeritus) Demographer                              | Johns Hopkins Univ                                           | United States of America (the)                             |
| becker, yannick                  | Neuroscience                                                  |                                                              | France                                                     |
| Becker, Florian                  | MSc and PhD candidate in Meteorology                          | Karlsruhe Institute of Technology                            | Germany                                                    |
| Becker, Francois                 | Chief Curator, Natural History                                | National Museum of Namibia                                   | Namibia                                                    |
| Becker, Christian                | Chemist                                                       | Freie Universität Berlin                                     | Germany                                                    |
| Becker, Fernando                 | Professor Associado. Department of Ecology                    | Universidade Federal do Rio Grande do Sul                    | Brazil                                                     |
| Becker, Fernando Gertum          | Professor Associado. Department of Ecology                    | Universidade Federal do Rio Grande do Sul                    | Brazil                                                     |
| Becker, Dr. Konstantin           | Scientist and teacher in agriculture                          | Justus-Liebig-Universität Giessen                            | Germany                                                    |
| Becker, Julie                    | Associate Professor, Environmental Health                     |                                                              | United States of America (the)                             |
| Beckett, Brenden                 | Ecologist focusing on the effect of deforestation on spiders. | Edge Hill University                                         | United Kingdom of Great Britain and Northern Ireland (the) |
| Beckett, Stephen                 | Research Scientist, School of Biological Sciences             | Georgia Institute of Technology                              | United States of America (the)                             |
| BECKING, Thomas                  | Postdoctoral position                                         | CNRS - French National Center for Scientific Research        | France                                                     |
| Beckman, Noelle                  | Assistant Professor, Ecology                                  | Utah State University                                        | United States of America (the)                             |
| Becktell, Margot                 | Associate Professor of Biology                                | Colorado Mesa University                                     | United States of America (the)                             |
| Beckwith, Robaire                | Research Scientist                                            | Cambridge Univ                                               | United Kingdom of Great Britain and Northern Ireland (the) |
| Becquet, Valentine               | Researcher in Demography                                      | French Institute for Demographic Studies (Ined)              | France                                                     |
| Becsi, Benedikt                  | Senior Scientist, Meteorology and Climatology                 | University of Natural Resources and Life Sciences, Vienna    | Austria                                                    |
| bedhomme, stephanie              | Researcher in Evolutionary Biology                            | CNRS                                                         | France                                                     |
| Bednar, Lubomir                  | Doctoral researcher                                           | Humboldt Univeristy Berlin                                   | Germany                                                    |
| Bednarska, Agnieszka             | Assistant Professor                                           | Jagiellonian University, Institute of Environmental Sciences | Poland                                                     |
| Bednarz, James                   | Senior Lecturer/Conservation Biology                          | University of North Texas                                    | United States of America (the)                             |
| Bedner, Marc                     | medical laboratory scientist                                  | retired                                                      | United States of America (the)                             |
| Bedoya, Ricardo                  | Forester                                                      | –                                                            | Costa Rica                                                 |

|                              |                                                                                     |                                                                                                                       |                                                            |
|------------------------------|-------------------------------------------------------------------------------------|-----------------------------------------------------------------------------------------------------------------------|------------------------------------------------------------|
| Bee, Kate                    | Primatology                                                                         |                                                                                                                       | United Kingdom of Great Britain and Northern Ireland (the) |
| Beebe, Alfred                | Mathematics                                                                         | Salisbury University                                                                                                  | United States of America (the)                             |
| Beege, Maik                  | Post-Doctoral Researcher / Media- and Instructional Psychology                      | Chemnitz University of Technology                                                                                     | Germany                                                    |
| Beer, Amy-Jane               | Biologist and writer                                                                |                                                                                                                       | United Kingdom of Great Britain and Northern Ireland (the) |
| Begay, PhD, MPH, Tommy K.    | Clinical Assistant Professor                                                        | Department of Psychiatry, College of Medicine, University of Arizona                                                  | United States of America (the)                             |
| Begeman, Lineke              | Phd student; veterinary medicine                                                    | Erasmus medical centre                                                                                                | Netherlands (the)                                          |
| Beget, James                 | Professor Emeritus, Geology and Geophysics                                          | University of Alaska-Fairbanks                                                                                        | United States of America (the)                             |
| Beggs, Jacqueline            | Professor in Ecology                                                                | University of Auckland                                                                                                | New Zealand                                                |
| Bégin, Paschale Noël         | PhD student in aquatic ecology                                                      | Université Laval                                                                                                      | Canada                                                     |
| Begoña, Gartzia de Bikuña    | Director técnico                                                                    | Anbiotek Biotechnologies                                                                                              | Spain                                                      |
| Begossi, Alpina              | Researcher in Fisheries and Food                                                    | State University of Campinas                                                                                          | Brazil                                                     |
| Begovac, Paul C.             | Biologist                                                                           | Retired - W. L. Gore & Associates                                                                                     | United States of America (the)                             |
| Begue, laurent               | Full professor                                                                      | University Grenoble Alpes                                                                                             | France                                                     |
| Beh, Chee Yang               | Physics & Engineering / Investment                                                  |                                                                                                                       | Singapore                                                  |
| behaghel, thibault           | Research Engineer                                                                   | Laboratory of Astrophysics of Marseille                                                                               | France                                                     |
| beher, jutta                 | phd candidate                                                                       | university of melbourne                                                                                               | Australia                                                  |
| Behmene, Ibrahim el Khalil   | Aquaculture                                                                         | University of mostaganem Algérie                                                                                      | Algeria                                                    |
| Behra, Philippe              | Professor - Environment chemistry                                                   | Institut National Polytechnique de Toulouse                                                                           | France                                                     |
| Behrens, Max                 | Biometry and Statistics                                                             | Institute of Medical Biometry and Statistics, Faculty of Medicine and Medical Center –University of Freiburg, Germany | Germany                                                    |
| Beier, Christian             |                                                                                     | PUCRS - Pontificia Universidade Católica do Rio Grande do Sul                                                         | Brazil                                                     |
| Beigbeder, Joana             | Researcher                                                                          | IMT mines Ales                                                                                                        | France                                                     |
| Beikert, Günther             | PhD in physics, teaching in professional education                                  | Land Baden-Württemberg                                                                                                | Germany                                                    |
| Beirne, Christopher          | Postdoctoral Researcher                                                             | University of British Columbia                                                                                        | Canada                                                     |
| Beiroz, Wallace              | Lecturer - Environmental management and Restoration of Degraded Areas               | Universidade Federal do Sul e Sudeste do Pará                                                                         | Brazil                                                     |
| Beisiegel, Beatriz           | Environmental analyst                                                               | Instituto Chico Mendes de Conservação da Biodiversidade                                                               | Brazil                                                     |
| Beisner, Beatrix             | Professor, Biological Sciences (Aquatic Ecology)                                    | University of Quebec at Montreal                                                                                      | Canada                                                     |
| BEJAoui, Bouchara            | PhD. Student and Social Psychologist of Health                                      | University of Lyon                                                                                                    | France                                                     |
| Bekele, Alemayehu            | Civil Engineer/Geotechnical Engineer                                                | Addis Ababa university, Addis Ababa institute of technology                                                           | Ethiopia                                                   |
| Bekken, Marijke              | Staff Air Pollution Specialist                                                      | California Air Resources Board (Retired)                                                                              | United States of America (the)                             |
| Bekkouche, Yasmine           | Post-doctoral researcher                                                            | Université Libre de Bruxelles                                                                                         | Belgium                                                    |
| Béla, Dominik                | Software engineer                                                                   | Technical University of Košice                                                                                        | Slovakia                                                   |
| Belachew, Kifleariam Yehuala | PhD Candidate at doctoral program in sustainable use of renewable natural resources | University of Helsinki                                                                                                | Finland                                                    |

|                                |                                                         |                                                               |                                                            |
|--------------------------------|---------------------------------------------------------|---------------------------------------------------------------|------------------------------------------------------------|
| Belch, Jill                    | Professor of Vascular Medicine                          | University of Dundee                                          | United Kingdom of Great Britain and Northern Ireland (the) |
| Belgrano, Andrea               | Associate Professor                                     | Swedish University of Agricultural Sciences                   | Sweden                                                     |
| Belien, Evelyn                 | Postdoctoral researcher, Forest ecology                 | Uqac                                                          | Canada                                                     |
| BELIN, Catherine               | Retired                                                 | Ifremer                                                       | France                                                     |
| Belisle, Marc                  | Professor / Landscape-scale behavioral ecology          | Dep. de biologie, U de Sherbrooke                             | Canada                                                     |
| Bell, Julia                    | Doctor                                                  | National health service                                       | United Kingdom of Great Britain and Northern Ireland (the) |
| Bell, Jerry                    | Professor of Chemistry Emeritus                         | Simmons University                                            | United States of America (the)                             |
| Bellamy, Patricia              | Environmental statistician                              |                                                               | United Kingdom of Great Britain and Northern Ireland (the) |
| Bellanger, Jean-Michel         | Researcher in Ecology/mycology                          | French National Center for Scientific Research                | France                                                     |
| Bellefroid, Elke               | Botanist curator living collections                     | Meise Botanic Garden                                          | Belgium                                                    |
| Bellemare, Jesse               | Associate Professor; Plant Ecologist                    | Smith College                                                 | United States of America (the)                             |
| BELLEUDY, Philippe             | Prof. Emeritus / Hydrology                              | Université Grenoble Alpes IGE                                 | France                                                     |
| Belli, Veronica                | Forest Engineering                                      | Universidad Nacional Agraria La Molina                        | Peru                                                       |
| Belliard, Jérôme               | Aquatic Ecology                                         | Irstea                                                        | France                                                     |
| Bellido López, Juan Jesús      | Marine Research                                         | Aula del Mar                                                  | Spain                                                      |
| Belling, Daniel                | Political Science                                       | University of Kent                                            | Germany                                                    |
| Bellini, Alberto               | Associate professor of energy conversion                | University of Bologna                                         | Italy                                                      |
| Bellissimo-Rodrigues, Fernando | Associate Professor                                     | Ribeirão Preto Medical School - University of São Paulo       | Brazil                                                     |
| Bellos, Dimitris               | Biologist/Ecologist                                     | University of Bremen                                          | Greece                                                     |
| Bellot, Sidonie                | Postdoctoral researcher                                 | Royal Botanic Gardens Kew                                     | United Kingdom of Great Britain and Northern Ireland (the) |
| Bellucci, Elisa                | Researcher - Agricultural genetics                      | Università Politecnica delle Marche                           | Italy                                                      |
| Bellvé, André                  | PhD student (Environmental Science                      | University of Auckland                                        | New Zealand                                                |
| Belmaker, Amos                 | Collection manager of birds                             | The Steinhardt Museum of Natural History, Tel Aviv University | Israel                                                     |
| Belmaker, Miriam               | Associate Professor of Anthropology                     | The University of Tulsa                                       | United States of America (the)                             |
| Belmaker, Ilana                | Associate Professor of Public Health                    | Ben Gurion University of the Negev                            | Israel                                                     |
| Belohlavy, Stefanie            | PhD Student in Evolutionary Biology                     | IST Austria                                                   | Austria                                                    |
| Bélontrade, Maxime             | PhD in Biochemistry                                     |                                                               | France                                                     |
| Belton, Sam                    | Final year PhD candidate in plant-microbe interactions. | University College Dublin                                     | Ireland                                                    |
| Beltran, Juan F.               | Professor- Zoology                                      | University of Seville                                         | Spain                                                      |
| BELTRAN, CARMEN                | Associate Professor/Biological Area                     | IBT-UNAM                                                      | Mexico                                                     |
| Beltrán, Juan F.               | Profesor Titular                                        | Dept. Zoology, University of Seville                          | Spain                                                      |
| Beltrán-Abaunza, José M.       | Research Scientist                                      | AquaBiota Water Research                                      | Sweden                                                     |
| Belzunces, Luc                 | Director of Research                                    | INRAE                                                         | France                                                     |
| Bemis, Ashley                  | PhD Candidate, Astrophysics                             | McMaster University                                           | Canada                                                     |
| Ben Mocha, Yitzchak            | Biology                                                 | Max Planck Institute for Ornithology                          | Germany                                                    |



|                               |                                                                                  |                                                                                                            |                                                            |
|-------------------------------|----------------------------------------------------------------------------------|------------------------------------------------------------------------------------------------------------|------------------------------------------------------------|
| Ben-Hamadou, Radhouane        | Associate Professor, Head of Department of Biological and Environmental Sciences | Qatar University                                                                                           | Qatar                                                      |
| Benatar, Solomon              | Emeritus Professor of Medicine                                                   | University of Cape Town                                                                                    | South Africa                                               |
| Benavides, Martin             | PhD Candidate in Marine Sciences                                                 | UNC Institute of Marine Sciences                                                                           | United States of America (the)                             |
| Benavides-Mendoza, Adalberto  | Research Professor, Horticulture                                                 | Universidad Autónoma Agraria Antonio Narro                                                                 | Mexico                                                     |
| Benayas, Javier               | Ecology Professor                                                                | Universidad Autónoma de Madrid                                                                             | Spain                                                      |
| Benchimol-Reis, Luciana Lasry | Scientifica Researcher and Professor - Molecular Plant Genetics                  | Instituto Agronômico de Campinas (IAC)/ Agronomic Institute of Campinas                                    | Brazil                                                     |
| Bencini, Roberta              | Associate Professor                                                              | The University of Western Australia                                                                        | Australia                                                  |
| Benda, Christian              | Scientist, Biochemistry and Structural Biology                                   | Max Planck Institute of Biochemistry                                                                       | Germany                                                    |
| Bendena, William              | Professor                                                                        | Queen's University                                                                                         | Canada                                                     |
| Bender, Irene M.A.            | Post-Doc - Functional diversity of plant-animal mutualism                        | Instituto de Ecología Regional (IER)                                                                       | Argentina                                                  |
| Bendixen, Quintin             | Senior Lecturer of Geology and Sustainability                                    | University of Wisconsin-Milwaukee at Waukesha                                                              | United States of America (the)                             |
| Bendre, Ameya                 | Research Associate (Structural Biology)                                          | National Centre for Cell Science                                                                           | India                                                      |
| Benedito Durá, Vicent         | Professor of Ecology                                                             | Universitat Politècnica de València                                                                        | Spain                                                      |
| Benedito Durà, Vicent         | Profesor Titular Ecología                                                        | Universitat Politècnica de València                                                                        | Spain                                                      |
| Benet, Luis                   | Associate Profesor / Physics                                                     | Universidad Nacional Autónoma de México                                                                    | Mexico                                                     |
| Benford, Frank                | Applied mathematics                                                              | Retired                                                                                                    | United States of America (the)                             |
| Bengtsson, Marie              | Professor in chemistry                                                           | Plant protection biology                                                                                   | Sweden                                                     |
| Bengtsson, Karin              | Senior lecturer plant ecology                                                    | Dept. of Ecology and Genetics, Uppsala University                                                          | Sweden                                                     |
| Bengtsson-Palme, Johan        | Assistant professor                                                              | Department of Infectious Diseases, Institute of Biomedicine, Sahlgrenska Academy, University of Gothenburg | Sweden                                                     |
| Benhadi-Marín, Jacinto        | Ecology                                                                          | Mountain Research Centre (CIMO)                                                                            | Portugal                                                   |
| Benhaiem, Sarah               | Post-doc, Behavioural Ecology                                                    | Leibniz Institute for Zoo and Wildlife Research                                                            | Germany                                                    |
| Beninde, Jannik               | PhD Student in Biology                                                           | University of Konstanz                                                                                     | Germany                                                    |
| Bénit, paule                  | PhD, research engineer                                                           | INSERM                                                                                                     | France                                                     |
| Benítez López, Ana            | Postdoc researcher                                                               | Estación Biológica de Doñana (EBD-CSIC)                                                                    | Spain                                                      |
| Benito, César                 | Full professor of Genetics                                                       | University Complutense of Madrid                                                                           | Spain                                                      |
| BENITO-ALONSO, José-Luis      | Ph. Dr. Biology                                                                  | JOLUBE                                                                                                     | Spain                                                      |
| Benitz, Tabatha               | Biologist                                                                        | Mamirauá Sustainable Development Institute                                                                 | Brazil                                                     |
| Benjelloun, Badr              | Researcher in livestock conservation genomics                                    | Institut National de la Recherche Agronomique Morocco                                                      | Morocco                                                    |
| Benkendorff, Kirsten          | Professor, Environmental Science                                                 | Southern Cross University                                                                                  | Australia                                                  |
| Benkman, Craig                | Professor                                                                        |                                                                                                            | United States of America (the)                             |
| Benko, Gabriella              | Plant Biology                                                                    | Berkeley                                                                                                   | United States of America (the)                             |
| Benn, Doug                    | Professor of Environmental Change                                                | University of St Andrews                                                                                   | United Kingdom of Great Britain and Northern Ireland (the) |
| Bennai, Mohamed Tahar         | Assistant professor                                                              | University of Boumerdes                                                                                    | Algeria                                                    |
| Benner, Chris                 | Professor, Environmental Studies and Sociology                                   | University of California Santa Cruz                                                                        | United States of America (the)                             |

|                              |                                                            |                                                                     |                                                            |
|------------------------------|------------------------------------------------------------|---------------------------------------------------------------------|------------------------------------------------------------|
| Bennett, Dorothy C           | Director, MOlecular & Clinical Sciences Research Institute | St George's, University of London                                   | United Kingdom of Great Britain and Northern Ireland (the) |
| Bennett, Elizabeth           | Vice President, Species Conservation                       | Wildlife Conservation Society                                       | United States of America (the)                             |
| Bennett, Carys               | geologist                                                  | University of Leicester                                             | United Kingdom of Great Britain and Northern Ireland (the) |
| Bennie, Jonathan             | Senior Lecturer in Geography                               | University of Exeter                                                | United Kingdom of Great Britain and Northern Ireland (the) |
| Benning, Liane G             | Prof Interface Geochemistry                                | GFZ German Research Centre fir Geosciences                          | Germany                                                    |
| Bennitt, Emily               | Senior research scholar in large herbivore ecology         | University of Botswana                                              | Botswana                                                   |
| Benocci, Andrea              | Museum curator                                             | Museo di Storia Naturale dell'Accademia dei Fisiocritici            | Italy                                                      |
| Benoit, Marc                 | Senior scientist un landscape agronomy                     | Institut National de Recherche Agronomique                          | France                                                     |
| Benot, Marie-Lise            | Assistant professor / Ecology                              | University of Bordeaux                                              | France                                                     |
| Bensoussan, Nathaniel        | Associate Researcher - Oceanography                        | Spanish Reasearch Council CSIC                                      | Spain                                                      |
| Bentall, Daniel              | Data Scientist                                             | Plant & Food Research                                               | New Zealand                                                |
| Bentkowski, Piotr            | Post-doc / computational biology                           | Institut Pierre Louis d'Epidémiologie et de Santé Publique (IPLESP) | France                                                     |
| Bentley, Blair               | Postdoctoral Researcher                                    | University of Western Australia                                     | Australia                                                  |
| Bentley, Michael             | Associate Professor (retired)                              | University of Tennessee, Knoxville                                  | United States of America (the)                             |
| Beranek, Chad                | Postdoctoral researcher                                    | University of Newcastle                                             | Australia                                                  |
| Berbel-Filho, Waldir         | Evolutionary biology                                       | Swansea University                                                  | United Kingdom of Great Britain and Northern Ireland (the) |
| Berben, Tom                  | Postdoctoral researcher                                    | Radboud University                                                  | Netherlands (the)                                          |
| Berdan, Emma                 | Researcher                                                 | University of Gothenburg                                            | Sweden                                                     |
| Berenguer Millanes, Cristina |                                                            | Wageningen University and Research (WUR)                            | Netherlands (the)                                          |
| Beresford, Alison            | Conservation Scientist                                     | RSPB Centre for Conservation Science                                | United Kingdom of Great Britain and Northern Ireland (the) |
| Beretz, Daniel               | Energy research, retired                                   |                                                                     | France                                                     |
| Berg, Judith                 | Wildlife Research                                          | Rocky Mountain National Park (R.A., Retired)                        | United States of America (the)                             |
| Berg, David                  | Computer Science                                           | IBM (Retired)                                                       | United States of America (the)                             |
| Berg, Shannon                | Health Services Researcher                                 | University of British Columbia                                      | Canada                                                     |
| Berg, Hermann                | Physicist                                                  | DLR                                                                 | Germany                                                    |
| Berg, Juliana                | education scientist                                        | Federal University of Paraná                                        | Brazil                                                     |
| Berg PhD, Terrance           | Faculty                                                    | Kwanten Polytechnic University                                      | Canada                                                     |
| Bergallo, Helena             | Professor                                                  | Universidade do Estado do Rio de Janeiro                            | Brazil                                                     |
| bergamini, ettore            | full professor of general pathology                        | currently Università Campus Biomedico Roma                          | Italy                                                      |
| Berger, Eva                  | Economist, Postdoc                                         | University of Mainz                                                 | Germany                                                    |
| Berger, Josef                | PhD                                                        | Lund University                                                     | Sweden                                                     |
| Berger, Anne                 | Biologist                                                  | Leibniz-Institute for Zoo and Wildlife Research                     | Germany                                                    |
| BERGER, Nicolas              | Ecodesign                                                  | Bordeaux university                                                 | France                                                     |
| Berger-Tal, Oded             | Senior lecturer, ecology                                   | Ben-Gurion University of the Negev                                  | Israel                                                     |
| Berges, John                 | Professor of Biological Science                            | University of Wisconsin-Milwaukee                                   | United States of America (the)                             |

|                                 |                                                           |                                                                            |                                |
|---------------------------------|-----------------------------------------------------------|----------------------------------------------------------------------------|--------------------------------|
| Bergfors, Terese                | research engineer/structural biology                      | Uppsala University                                                         | Sweden                         |
| Bergman, steven                 | PhD Exploration Research Geology                          | retired gentleman geologist, now at SCB Geosciences                        | United States of America (the) |
| Bergman, Thore                  | Associate Professor, Psychology and Biology               | University of Michigan                                                     | United States of America (the) |
| Bergmann, Iris M.               | PhD Scholar                                               | University of Sydney                                                       | Australia                      |
| Bergmann, Jonas                 | Doctoral Researcher                                       | Potsdam-Institute for Climate Impact Research (PIK)                        | Germany                        |
| Bergmann, Ph.D., Melanie        | Senior scientist / Marine Biology                         | Alfred Wegener Institute, Helmholtz Centre for Polar and Marine Research   | Germany                        |
| Bergs, Rolf                     | Economics & Political Science                             | PRAC                                                                       | Germany                        |
| Bergstrom, Bradley              | Professor of Biology                                      | Valdosta State University, Valdosta, GA                                    | United States of America (the) |
| berghold, Vincent               | Biologiste marin                                          | DEAL Guyane (Direction de l'environnement, aménagement et logement)        | French Guiana                  |
| Berhe, Asmeret Asefaw           | Professor, Soil Biogeochemistry                           | University of California, Merced                                           | United States of America (the) |
| Berjano, Regina                 | University Lecturer in Botany                             | University of Córdoba                                                      | Spain                          |
| Berk, Elizabeth                 |                                                           | Yale University                                                            | United States of America (the) |
| Berkeley, Elizabeth             | Assistant Professor of Biology and Earth Science          | Otterbein University                                                       | United States of America (the) |
| Berley, Robert                  | Psychology                                                | University of Washington - adjunct faculty, Psychiatry & Behavioral Health | United States of America (the) |
| Bermejo, Rodrigo                | Principal Investigator                                    | Spanish National Research Council                                          | Spain                          |
| Bermejo-Bermejo, Ana            | Ornithologist                                             | SEO/BirdLife                                                               | Spain                          |
| Bermudez Cruz, Rosa             | Researcher                                                | Research and advanced studies center                                       | Mexico                         |
| Bernadeta, Niesporek-Szamburska | Professor of Humanistic Sciences                          | University of Silesia in Katowice                                          | Poland                         |
| Bernadette, Teleky              | Research Assistant                                        | University of Agricultural Science and Veterinary Medicine of Cluj-Napoca  | Romania                        |
| Bernal, Ximena                  | Associate Professor                                       | Purdue University                                                          | United States of America (the) |
| Bernal, Ainhoa                  | Dr. in Marine Sciences                                    | University of Concepción                                                   | Chile                          |
| bernard, patrick                | mathematics                                               | Ecole Normale Supérieure                                                   | France                         |
| Bernard, David P                | Adjunct Professor                                         | Royal Roads University                                                     | United States of America (the) |
| Bernard, Jonathan               | Researcher, Epidemiology and Public Health                | Inserm                                                                     | France                         |
| Bernard, Marc                   | water quality                                             | Environement office                                                        | Switzerland                    |
| Bernard, Jean-Philippe          | Directeur de recherche, Astronomy                         | CNRS                                                                       | France                         |
| BERNARD, Rozenn                 | Associate Professor in Biochemistry and Molecular Biology | Sorbonne Université Sciences, PARIS                                        | France                         |
| Bernardino, Joana               | Researcher biologist                                      | CIBIO-InBIO                                                                | Portugal                       |
| Bernardo, Nicola                | Predoctoral researcher                                    | Biological Station of Doñana                                               | Spain                          |
| Bernardo-Madrid, Rubén          | PhD student                                               | Estación Biológica de Doñana-CSIC                                          | Spain                          |
| bernas, harry                   | research director, physics                                | CNRS                                                                       | France                         |
| Bernd, Karen                    | Professor of Biology                                      | Davidson College                                                           | United States of America (the) |
| Bernet, Matthias                | Associate Professor                                       | Institute des Sciences de la Terre Université Grenoble Alpes               | France                         |
| Berriel, Diana                  | MSc Marine Biology. Coastal Oceanography                  | CINVESTAV-Mérida                                                           | Mexico                         |
| Berrios, Hazel                  | Biologist                                                 | University of Alaska Fairbanks                                             | United States of America (the) |

|                        |                                                                                                         |                                                                    |                                                            |
|------------------------|---------------------------------------------------------------------------------------------------------|--------------------------------------------------------------------|------------------------------------------------------------|
| Berrones, Arturo       | Academic Coordinator of the Graduate Systems Engineering Program at Autonomous University of Nuevo Leon | Autonomous University of Nuevo Leon                                | Mexico                                                     |
| Berry, Amanda          | Research Associate                                                                                      | Pharmaceutical Sciences                                            | United States of America (the)                             |
| Berry, Ashton          | Global Climate Change Programme Coordinator                                                             | BirdLife International                                             | United Kingdom of Great Britain and Northern Ireland (the) |
| Bersch, Beate          | Scientist in Structural Biology (PhD)                                                                   | Institut for Structural Biology - UGA-CNRS-CEA                     | France                                                     |
| Berseneff, Boris       | Ingénieur chercheur                                                                                     | CEA                                                                | France                                                     |
| Bertani, Rogerio       | Researcher / Zoologist                                                                                  | Instituto Butantan                                                 | Brazil                                                     |
| Bertassoni, Alessandra | Post-doc researcher                                                                                     | Federal University of Goiás                                        | Brazil                                                     |
| Bertaux, Jean-Loup     | Directeur de Recherche emeritus CNRS                                                                    | LATMOS/CNRS                                                        | France                                                     |
| Berteaux, Dominique    | University Professor, Ecology                                                                           | Université du Québec à Rimouski                                    | Canada                                                     |
| Bertelsmeier, Cleo     | Professor of Ecology                                                                                    | University of Lausanne                                             | Switzerland                                                |
| Berthet, Mélissa       | Post-doc                                                                                                | École Normale Supérieure                                           | France                                                     |
| BERTHIER, Etienne      | Glaciologist                                                                                            | CNRS LEGOS                                                         | France                                                     |
| Berthomieu, Pierre     | Professor in Plant Physiology                                                                           |                                                                    | France                                                     |
| BERTILE, Fabrice       | Researcher                                                                                              | CNRS                                                               | France                                                     |
| Bertini, Giuseppe      | Assistant Professor of Histology                                                                        | University of Verona                                               | Italy                                                      |
| Bertman, Steve         | Professor of Chemistry                                                                                  | Western Michigan University                                        | United States of America (the)                             |
| Bertola, Laura         | Postdoctoral researcher                                                                                 | City College of New York                                           | United States of America (the)                             |
| Bertoldi, Giacomo      | Senior researcher, Ph.D., Hydrologist                                                                   | Eurac research                                                     | Italy                                                      |
| Bertolino, Sandro      | Professor in Ecology                                                                                    | University of Turin                                                | Italy                                                      |
| Bertora, Chiara        | Researcher in Agroecology                                                                               | University of Turin                                                | Italy                                                      |
| Bertossi, Alberto      | PhD student                                                                                             | University of Udine                                                | Italy                                                      |
| Bertoza, Filippo       | PhD student in Palaeontology                                                                            | Queen's University Belfast                                         | United Kingdom of Great Britain and Northern Ireland (the) |
| Bertram, Michael       | Postdoctoral Researcher                                                                                 | Swedish University of Agricultural Sciences                        | Sweden                                                     |
| Bertram, Christiane    | Assistant Professor                                                                                     | University Konstanz                                                | Germany                                                    |
| Bertrand, Philip       | PhD Candidate - Arctic Ecology                                                                          | Université du Québec à Rimouski (UQAR) - Norsk Polarinstitut (NPI) | Canada                                                     |
| Bertrand, Guillaume    | Lecturer in Hydrogeology and Hydrogeochemistry                                                          | Laboratoire Chrono-Environnement                                   | France                                                     |
| Bertrand, Arnaud       | Marine Ecology                                                                                          | IRD                                                                | France                                                     |
| Bertsch, Hans          | Marine Biology                                                                                          | Dr.                                                                | United States of America (the)                             |
| Bertuzzi, Patrick      | Research engineer - Director of AgroClim Laboratory                                                     | INRA                                                               | France                                                     |
| Bertzky, Monika        | Independent Consultant                                                                                  |                                                                    | Italy                                                      |
| Bertzky, Bastian       | Scientific Project Officer                                                                              | Joint Research Centre (JRC) of the European Commission             | Italy                                                      |
| Berville, Laurence     | Engineer / PhD                                                                                          | University of Tours / CNRS                                         | France                                                     |
| Besic, Nikola          | Postdoctoral researcher                                                                                 | Météo France                                                       | France                                                     |
| Besio, Roberta         | Post doctoral fellow                                                                                    | University of Pavia                                                | Italy                                                      |
| Besnard, Simon         | Post-doctoral                                                                                           | Max Planck Institute for Biogeochemistry                           | Germany                                                    |
| BESNARD, GUILLAUME     | Researcher                                                                                              | CNRS                                                               | France                                                     |

|                            |                                                                         |                                                              |                                                            |
|----------------------------|-------------------------------------------------------------------------|--------------------------------------------------------------|------------------------------------------------------------|
| Bessa, Eduardo             | Assistant professor of zoology                                          | University of Brasilia                                       | Brazil                                                     |
| Bessa Gomes, Carmen        | Lecture, Ecology                                                        | AgroParisTech                                                | France                                                     |
| Besse, Philippe            | Full professor of Mathematics                                           | Toulouse University                                          | France                                                     |
| Bessell, Tyson             | PhD candidate                                                           | Institute for Marine and Antarctic Studies                   | Australia                                                  |
| Besserman Vianna, Sergio   | Professor - Desenvolvimento Sustentável                                 | Pontificia Universidade católica - Rio de Janeiro            | Brazil                                                     |
| Besset, Manon              | Postdoctoral researcher                                                 | Geosciences Montpellier                                      | France                                                     |
| Bessiere, Pierre           | PhD student and veterinarian                                            | INRA                                                         | France                                                     |
| Besson, Mireille           | Researcher in cognitive neuroscience                                    | CNRS and Aix-Marseille University                            | France                                                     |
| Best, Frank                | Professor for International Management                                  | HTWG Konstanz                                                | Germany                                                    |
| Best, Megan                | Student MSc Environmental Sustainability                                | UCD                                                          | Ireland                                                    |
| Best, Peter                | Geophysics                                                              |                                                              | Canada                                                     |
| Besteiro, Isidro José      | Biologist                                                               | Droga Conde S.A.                                             | Spain                                                      |
| Bester, Laura              | PhD Student                                                             | University of Pretoria                                       | South Africa                                               |
| Betancourt-Portela, Julian | Chemical Engineer                                                       | INVEMAR                                                      | Colombia                                                   |
| Bethanis, Kostas           | Assistant Professor                                                     | Agrivultural University of Athens                            | Greece                                                     |
| Bethell, Emily             | Senior Lecturer in Primate Behaviour                                    | Liverpool John Moores University                             | United Kingdom of Great Britain and Northern Ireland (the) |
| Betley, Stanislaw          | professor, mathematics                                                  | University of Warsaw                                         | Poland                                                     |
| Betts, Matt                | Professor                                                               | Oregon State University                                      | United States of America (the)                             |
| Betzler, Shirin            | Cross-cultural Business Psychology                                      | Osnabrueck University                                        | Germany                                                    |
| Beudels-Jamar, Roseline    | Head, Conservation Biology Unit                                         | Royal Belgian Institute of Natural Sciences                  | Belgium                                                    |
| Beukhof, Esther            | Researcher                                                              | Wageningen Marine Research                                   | Netherlands (the)                                          |
| Beutner, Frank             | Medicine                                                                | Heart Center Leipzig                                         | Germany                                                    |
| Bevans, Rebecca            | Ecology                                                                 | VU Amsterdam                                                 | Netherlands (the)                                          |
| Beven, Laure               | Microbiology                                                            | University of Bordeaux INRA                                  | France                                                     |
| Bevilaqua, Dušan           | landscape ecologist                                                     | Catholic University in Ružomberok                            | Slovakia                                                   |
| Beyer, Torsten             | PHD in Chemistry                                                        | Dr. Beyer Internet-Beratung                                  | Germany                                                    |
| Beyer, John Henry          | PhD Geophysicist; Retired research program manager                      | Lawrence Berkeley National Laboratory                        | United States of America (the)                             |
| Beyersmann, Elisabeth      | Lecturer, Cognitive Science                                             | Macquarie University                                         | Australia                                                  |
| Beynon, Belinda            | Veterinarian                                                            | Serpentine Vet                                               | Australia                                                  |
| Bezak, Peter               | landscape ecology scientist                                             | Institute of Landscape Ecology of Slovak Academy of Sciences | Slovakia                                                   |
| Bezte, Candi               | Instructor, University of Winnipeg - Biology and Environmental Sciences | University of Winnipeg                                       | Canada                                                     |
| Bhalerao, Amol Kamalakar   | Scientist (Agriculture)                                                 | Indian Council of Agricultural Research                      | India                                                      |
| Bhattacharya, Saurabh      | Post-doctoral research fellow                                           | The Hebrew University of Jerusalem                           | Israel                                                     |
| Bhogaraju, Sagar           | Group leader/ Structural biology                                        | EMBL                                                         | France                                                     |
| Bi, Qingfang               | PhD student                                                             | Zhejiang university                                          | China                                                      |
| Bialasiewicz, Seweryn      | Senior Research Fellow                                                  | University of Queensland                                     | Australia                                                  |
| Bialozyt, Ronald           |                                                                         | Northwest Forest Research Institute                          | Germany                                                    |
| Bianchi, Carlo Nike        | Professor of Ecology                                                    | University of Genoa                                          | Italy                                                      |

|                                |                                                         |                                                                           |                                                            |
|--------------------------------|---------------------------------------------------------|---------------------------------------------------------------------------|------------------------------------------------------------|
| Bianchi, Carlos                | Professor                                               | Universidade Federal de Goiás                                             | Brazil                                                     |
| Bianchi, Rita                  | Professor/Ecology                                       | São Paulo State University                                                | Brazil                                                     |
| Bianchi, Andrea                | Professor of Physics                                    | Universite de Montreal                                                    | Canada                                                     |
| Bianchi, Andrea                | PhD Student                                             | University of Bonn                                                        | Italy                                                      |
| Bianchini Jr., Irineu          | Professor Limnology/Environmental Sciences              | Universidade Federal de São Carlos                                        | Brazil                                                     |
| Biancolini, Dino               | PhD candidate in Evolutionary and Environmental Biology | Sapienza University of Rome                                               | Italy                                                      |
| Biard, Yannick                 | Life Cycle Assessment of agri-food products             | CIRAD                                                                     | France                                                     |
| Biard, Clotilde                | Associate Professor in Ecology & Evolution              | Sorbonne Université                                                       | France                                                     |
| BIBBINS, MARTHA                | Research leader                                         | National Polytechnic Institute (IPN)                                      | Mexico                                                     |
| Biber, Jean-Pierre             | biologist                                               | Bureau Natcons                                                            | Switzerland                                                |
| bibi, sidra                    | researcher                                              | TU Berlin                                                                 | Germany                                                    |
| Bicca-Marques, Júlio César     | Professor                                               | Pontifical Catholic University of Rio Grande do Sul                       | Brazil                                                     |
| Bichet, Vincent                | Dr. Associate Professor / Geosciences                   | University of Franche-Comté                                               | France                                                     |
| Bichuette, Maria Elina         | Associate Professor                                     | Universidade Federal de São Carlos                                        | Brazil                                                     |
| Bicknell, Jake                 | Lecturer in Conservation Biology                        | University of Kent                                                        | United Kingdom of Great Britain and Northern Ireland (the) |
| Bicudo, Jose Eduardo           | Emeritus Professor of Physiology                        | University of São Paulo                                                   | Brazil                                                     |
| bicudo da silva, ramon felipe  | Environmental Sciences                                  | State University of Campinas                                              | Brazil                                                     |
| Biddanda, Bopi                 | Professor of Water Resources                            | Annis Water Resources Institute, Grand Valley State University            | United States of America (the)                             |
| Bieber, Claudia                | Senior Researcher                                       | Department of Interdisciplinary Life Sciences                             | Austria                                                    |
| Biebl, Anna                    | Environmental Science / Researcher                      | alchemia-nova GmbH                                                        | Austria                                                    |
| Biedermann, Peter              |                                                         | University Wuerzburg                                                      | Germany                                                    |
| Bieling, Claudia               | Professor                                               | University of Hohenheim                                                   | Germany                                                    |
| Biemans, Floor                 | Post-doctoral researcher veterinary epidemiology        | University College Dublin                                                 | France                                                     |
| Bien, Samuel                   | Master's Student of Climate Science                     | University of Potsdam                                                     | Germany                                                    |
| Biermann, Lauren               | Remote sensing scientist                                | Plymouth Marine Laboratory                                                | United Kingdom of Great Britain and Northern Ireland (the) |
| Bierne, Nicolas                | Director of research                                    | CNRS                                                                      | France                                                     |
| Bigatti, Gregorio              | Principal Resarcher                                     | IBIOMAR-CONICET                                                           | Argentina                                                  |
| Bigio, Narcisio Costa          | Professor of Systematic Botany                          | University Federal of Rondônia                                            | Brazil                                                     |
| Bijleveld van Lexmond, Maarten | Chair IUCN Task Force on Systemic Pesticides TFSP       | Director Papiliorama Foundation, Switzerland                              | France                                                     |
| Bijma, Jelle                   | Marine biogeosciences                                   | Alfred-Wegener-Institut, Helmholtz Zentrum für Polar- und Meeresforschung | Germany                                                    |
| Biketova, Alona                | postdoctoral researcher, biology                        | Biological Research Centre of the Hungarian Academy of Sciences           | Hungary                                                    |
| Bilan, Meri                    | PhD student                                             | University of Salento                                                     | Italy                                                      |
| Bilcke, Joke                   |                                                         | Antwerp University                                                        | Belgium                                                    |
| Bilderbeek, Richel             | HPC support                                             | NBIS                                                                      | Sweden                                                     |
| Biliskov, Nikola               | Research associate, Chemistry                           | Rudjer Boskovic Institute, Zagreb                                         | Croatia                                                    |
| Billaud, Olivier               | PhD student                                             | Muséum Nationale d'Histoire Naturelle                                     | France                                                     |

|                                  |                                            |                                                                              |                                                            |
|----------------------------------|--------------------------------------------|------------------------------------------------------------------------------|------------------------------------------------------------|
| Billebaud, Françoise             | Senior scientist, Astrophysics             | Laboratoire d'Astrophysique de Bordeaux, Bordeaux University                 | France                                                     |
| Billen, Gilles                   | Prof Biogeochemistry                       | CNRS _Sorbonne Université                                                    | France                                                     |
| Billings, Dorothy                | Professor Emerita Anthropology             | Wichita State University                                                     | United States of America (the)                             |
| Bilodeau, Stéphane               | PhD, Master in Applied Sciences, Engineer  | University of Sherbrooke / Enerstat / Novacab                                | Canada                                                     |
| Bilton, David                    | Professor of Aquatic Biology               | University of Plymouth                                                       | United Kingdom of Great Britain and Northern Ireland (the) |
| Binette, Luc                     | Researcher in astrophysics                 | Instituto de Astronomía, Universidad Nacional Autónoma de México             | Mexico                                                     |
| Binggeli, Anaïs                  | Conservation biologist                     | University of Bern                                                           | Switzerland                                                |
| Bingham, Conor                   | Environmental Scientist                    | Verterra                                                                     | Australia                                                  |
| Bingre do Amaral, Pedro          | Professor                                  | Instituto Politécnico de Coimbra                                             | Portugal                                                   |
| Binosi, Daniele                  | Physicist                                  | European Centre for theoretical studies in nuclear physics and related areas | Italy                                                      |
| Biondo, Monica                   | Head of Research and Conservation          | Fondation Franz Weber                                                        | Switzerland                                                |
| Biondo, Cibele                   | Associate Professor/Evolutionary Ecology   | UFABC                                                                        | Brazil                                                     |
| Bird, Tomas                      | International Development                  | United Nations Population Fund                                               | Canada                                                     |
| Bird, Tharina                    | Lecturer, Arachnologist                    | Botswana International University of Science and Technology                  | Botswana                                                   |
| Birindelli, José                 | PhD, Professor, Zoology, Ichthyology       | State University of Londrina                                                 | Brazil                                                     |
| Birkeland, Charles               | Professor Emeritus Marine Biology          | University of Hawaii at Manoa                                                | United States of America (the)                             |
| Birkholz, Mario                  | Physicist                                  | Joint Lab Bioelectronics IHP/TU Berlin                                       | Germany                                                    |
| Birt, Tim                        | Adjunct Professor of Biology               | Queen's University                                                           | Canada                                                     |
| Birtill, John                    | Honorary Senior Research Fellow            | University of Glasgow                                                        | United Kingdom of Great Britain and Northern Ireland (the) |
| Bis, Barbara                     | Freshwater Ecologist                       | University of Łódź                                                           | Poland                                                     |
| Bisaccia-Bijelic, Marilena       | PhD student, bioorganic chemistry          | Faculty of Chemistry, University of Vienna                                   | Austria                                                    |
| Bischof, Julian                  | Research Associate                         | Institute for Housing and Environment                                        | Germany                                                    |
| Bissessur, Prishnee              | PhD candidate                              | University of Mauritius                                                      | Mauritius                                                  |
| Bisson, Terrence                 | Department of Mathematics and Statistics   | Canisius College                                                             | United States of America (the)                             |
| Biswas, Asim                     | Associate Professor                        | University of Guelph                                                         | Canada                                                     |
| Bita-Nicolae, Claudia            | Ph.D./Plant Ecology                        | Institute of Biology Bucharest                                               | Romania                                                    |
| Bittebiere, Anne-Kristel         | Assistant Professor                        | Université Lyon 1 - UMR 5023 LEHNA                                           | France                                                     |
| Bittencourt, Paulo               | Plant Ecologist                            | University of Exeter                                                         | United Kingdom of Great Britain and Northern Ireland (the) |
| Bittioli Rodrigues Gomes, Felipe | Professor                                  | Universidade Federal do Pará                                                 | Brazil                                                     |
| Bittman, Roxanne                 | Conservation biologist and plant ecologist | California Natural Diversity Database, CDFW                                  | United States of America (the)                             |
| Bittrich, Volker                 | Professor / Botany                         |                                                                              | Brazil                                                     |
| Bitzidou, Malamati               | Postdoctoral Researcher                    | The Francis Crick Institute                                                  | United Kingdom of Great Britain and Northern Ireland (the) |
| Bizzo, Nelio                     | Full Senior Professor                      | University of São Paulo                                                      | Brazil                                                     |
| Bjornstad, Bruce                 | Geologist                                  | Retired                                                                      | United States of America (the)                             |

|                         |                                                   |                                                                  |                                                            |
|-------------------------|---------------------------------------------------|------------------------------------------------------------------|------------------------------------------------------------|
| Blacher, Pierre         | Researcher in evolutionary biology                | University of Lausanne                                           | Switzerland                                                |
| Black, Sandra           | Clinical Associate Professor                      | University of Calgary Faculty of Veterinary Medicine             | Canada                                                     |
| Black, Morgan           |                                                   | University of Victoria                                           | Canada                                                     |
| Black, Scott            | Executive Director                                | The Xerces Society for Invertebrate Conservation                 | United States of America (the)                             |
| Black, Jeff             | Professor, Wildlife Conservation and Management   | Cal Poly Humboldt (formerly Humboldt State University)           | United States of America (the)                             |
| Black, Peter            | Veterinary epidemiologist                         | Essential Foresight                                              | Australia                                                  |
| Black, James            | Experimental scientist                            | Institute fir Marine and Antarctic Studies                       | Australia                                                  |
| Black, Cameron          | Clinical application of Regenerative Medicine     | University of Southampton                                        | United Kingdom of Great Britain and Northern Ireland (the) |
| Black-Decima, PATRICIA  | Retired Professor of Animal Behavior, Biology     | Universidad Nacional de Tucuman                                  | Argentina                                                  |
| Blackburn, David        | Associate Curator                                 | University of Florida                                            | United States of America (the)                             |
| BlackEagle, Cory        | geologist                                         | Eastern Kentucky University                                      | United States of America (the)                             |
| Blackie, Nicole         | Environmental Scientist-Contaminated Land Analyst | Victoria University of Wellington                                | New Zealand                                                |
| Blackler, Thea          | Professor of industrial design                    | Queensland University of technology                              | Australia                                                  |
| Blackmore, Susan        | Visiting Professor in Psychology                  | University Of Plymouth                                           | United Kingdom of Great Britain and Northern Ireland (the) |
| Blackmore, Stephen      | Queen’s Botanist and Honorary Fellow              | Royal Botanic Garden Edinburgh                                   | United Kingdom of Great Britain and Northern Ireland (the) |
| Blackshaw, James        | Scientific Data Engineer                          | EMBL-EBI                                                         | United Kingdom of Great Britain and Northern Ireland (the) |
| Blackwell, Eric         | Associate Professor of Biology                    | Delta State University                                           | United States of America (the)                             |
| Bladon, Kevin           | Department Head and Forest Hydrologist            | Oregon State University                                          | United States of America (the)                             |
| Blair, Gordon           | Distinguished Professor                           | Lancaster University                                             | United Kingdom of Great Britain and Northern Ireland (the) |
| Blair, Danny            | Professor of Geography                            | University of Winnipeg                                           | Canada                                                     |
| Blair, Zachary          | Anthropology                                      |                                                                  | United States of America (the)                             |
| Blair, Alan             | Clinical Psychologist                             | NHS                                                              | United Kingdom of Great Britain and Northern Ireland (the) |
| Blais, Alexandre        | Scientific director, Institut quantique           | Université de Sherbrooke                                         | Canada                                                     |
| blake, stephen          | Assistant Professor, Biology                      | Saint Louis University                                           | United States of America (the)                             |
| Blake, David            | Independent researcher                            |                                                                  | United Kingdom of Great Britain and Northern Ireland (the) |
| Blakemore, Rob          | Soil Ecologist                                    | VermEcology                                                      | Japan                                                      |
| Blanc, Lori             | Assistant Professor, Conservation Biology         | Virginia Tech                                                    | United States of America (the)                             |
| Blanc, lilian           | Ecology                                           | CIRAD                                                            | France                                                     |
| Blanc, Guillaume        | Associate professor in physics (astrophysics)     | Université Paris Diderot, Laboratoire de l’Accélérateur Linéaire | France                                                     |
| BLANC, Antoine          | PhD student / Hydro-meteorology                   | Institut des Géosciences de l’Environnement (IGE)                | France                                                     |
| Blanc-Mathieu, Romain   |                                                   | Kyoto University                                                 | Japan                                                      |
| Blanch Llosa, Estefania | Researcher in aeronomy physics                    | Observatori de l’Ebre                                            | Spain                                                      |
| Blanchard, Alain        | Professor of microbiology                         | University of Bordeaux                                           | France                                                     |



|                          |                                                                 |                                                                                                |                                                            |
|--------------------------|-----------------------------------------------------------------|------------------------------------------------------------------------------------------------|------------------------------------------------------------|
| Blanchart, Eric          | Senior scientist / soil ecologist                               | IRD                                                                                            | France                                                     |
| Blanchon, Paul           | Research Scientist                                              | Inst. Ciencias del Mar, Univ. Nac. Auto. de Mexico                                             | Mexico                                                     |
| Blanchouin, Arnaud       | Ingineer                                                        | Irstea                                                                                         | France                                                     |
| Blanckenberg, Michelle   | Conservation Biology PhD candidate                              | University of Cape Town                                                                        | South Africa                                               |
| Blanco, Victor           | Postdoctoral researcher / environmental science                 | ETH Zurich                                                                                     | Switzerland                                                |
| Blanco, Juan A.          | Assitant Professor, Ecology                                     | Univresidad Publica de Navarra                                                                 | Spain                                                      |
| Blanco-Libreros, Juan    | Full Professor in Ecology                                       | Instituto de Biologia, Universidad de Antioquia                                                | Colombia                                                   |
| Blanco-Sacristán, Javier | PhD student                                                     | University of Milano-Bicocca                                                                   | Italy                                                      |
| Blankers, Thomas         | Postdoctoral fellow in evolutionary genetics                    |                                                                                                | Netherlands (the)                                          |
| Blankespoor, Harvey D.   | Professor Emeritus of Biology                                   | Hope College and Univ. of Michigan Biol. Station                                               | United States of America (the)                             |
| Blankestijn, Wouter      | Research Assistant                                              | Swedish University of Agricultural Sciences (SLU)                                              | Sweden                                                     |
| Blanton, Natalie         | PhD Candidate - Sociology                                       | University of Utah                                                                             | United States of America (the)                             |
| Blarr, Maria             | PhD Student                                                     | Chalmers University of Technology                                                              | Sweden                                                     |
| Blas, Julio              | Tenured Researcher, Ecology                                     | Spanish Research Council CSIC                                                                  | Spain                                                      |
| Blaschka, Albin          | Researcher                                                      | AREC Raumberg-Gumpenstein                                                                      | Austria                                                    |
| Blaschke, Paul           | Environmental Consultant, lecturer and Honorary Research Fellow | Victoria University of Wellington                                                              | New Zealand                                                |
| Blasdell, Kim            | Infectious diseases                                             | Commonwealth Scientific and Industrial Research Organisation                                   | Australia                                                  |
| Blaser, Patrick          | Scientist in paleoclimatology                                   | Heidelberg University                                                                          | Germany                                                    |
| Blasius, Melanie         | Associate professor                                             | University of Copenhagen                                                                       | Denmark                                                    |
| Blaszczyk, Maria         | Research Affiliate, Department of Biological Anthropology       | University of Texas at Austin                                                                  | United States of America (the)                             |
| Blättler, Linda          | PhD student - Environmental studies                             | Center of Environment, Charles University in Prague                                            | Czech Republic (the)                                       |
| Blau, Judith             | professor emerita                                               | university of north carolina chapel hill                                                       | United States of America (the)                             |
| Blaurock, Katharina      | PhD Student - Hydrology                                         | University of Bayreuth                                                                         | Germany                                                    |
| Blaustein, Edgar         | Economist                                                       | Global Chance                                                                                  | France                                                     |
| Blawid, Rosana           | Professor                                                       | UFRPE                                                                                          | Brazil                                                     |
| Blawid, Stefan           | Professor of Computer Engineering                               | Federal University of Pernambuco                                                               | Brazil                                                     |
| Blecher, Arantxa         | MSc Zoology Student                                             | University of Pretoria                                                                         | South Africa                                               |
| Blecher, Tariq           | Data Scientist                                                  | South African Radio Astronomical Observatory                                                   | South Africa                                               |
| BLEIN-NICOLAS, Mélisande | Research engineer / plant biology                               | INRA                                                                                           | France                                                     |
| Bleu, Josefa             | Associate Professor in Ecology                                  | University of Strasbourg                                                                       | France                                                     |
| Bley Loez, Carolina      | Enseignant-chercheur                                            | ISIT                                                                                           | France                                                     |
| Blicharska, Malgorzata   | Associate Professor, Senior Lecturer                            | Uppsala University                                                                             | Sweden                                                     |
| Bligh, Chris             | Applied Bilogist                                                | Brunel University Graduate 1977                                                                | United Kingdom of Great Britain and Northern Ireland (the) |
| Blight, Louise           | Adjunct Associate Professor/ AND Principal                      | School of Environmental Studies, University of Victoria/ AND Procellaria Research & Consulting | Canada                                                     |
| Block, Thomas            | Professor Department of Political Sciences                      | Ghent University                                                                               | Belgium                                                    |
| Blockstein, David        | Senior Adviser                                                  | Association for Environmental Studies and Sciences                                             | United States of America (the)                             |
| Blonda, Massimo          | Researcher                                                      | CNR                                                                                            | Italy                                                      |

|                            |                                                                            |                                                                     |                                                            |
|----------------------------|----------------------------------------------------------------------------|---------------------------------------------------------------------|------------------------------------------------------------|
| Blondé, Ward               | PhD bioinformatics                                                         |                                                                     | Belgium                                                    |
| Blondeau Da Silva, Anne    | Lecturer in Ecology                                                        | University of Limoges                                               | France                                                     |
| Błońska, Agnieszka         | biology                                                                    | University of Silesia in Katowice                                   | Poland                                                     |
| bloomberg, simon           | senior environmental scientist                                             | e3Scientific Limited                                                | New Zealand                                                |
| Blouin, Richard            | Professor, cell biology                                                    | Université de Sherbrooke                                            | Canada                                                     |
| Bluhm, Chris               | PhD student and Scientific Assistant                                       | Martin-Luther-University Halle-Wittenberg                           | Germany                                                    |
| Blum, Brett                | Wildlife Biologist/Manager Biological Field Station and Experimental Range | University of Arizona                                               | United States of America (the)                             |
| Blumstein, Daniel          | Professor of Ecology and Evolutionary Biology                              | University of California Los Angeles                                | United States of America (the)                             |
| Blundo, Cecilia            | Research assistant                                                         | IER CONICET-UNT                                                     | Argentina                                                  |
| Boatman, Bruce             | Research Operator                                                          | University of Zurich                                                | Switzerland                                                |
| Boccasavia, Viola Lucrezia | Post Doc Researcher                                                        |                                                                     | Italy                                                      |
| Bochaton, Nicolas          | Limnology                                                                  |                                                                     | France                                                     |
| Bochorny, Thuane           | PhD in Plant Biology                                                       | Universidade Estadual de Campinas                                   | Brazil                                                     |
| Böckle, Theresa            | Ecology                                                                    | University of Vienna                                                | Austria                                                    |
| Bockmann, Flávio           | Professor, Head of Department                                              | University of São Paulo, FFCLRP, Dept. Biology                      | Brazil                                                     |
| Bocksberger, Gaëlle        | Post-Doctoral research fellow                                              | Max Planck Institute for Evolutionary Anthropology                  | Germany                                                    |
| Boco, Sheldon Rey          | Researcher                                                                 | Philippine Jellyfish Stings Project                                 | Philippines (the)                                          |
| Bodart, Julien             | PhD candidate                                                              | University of Edinburgh                                             | United Kingdom of Great Britain and Northern Ireland (the) |
| Bode, Nena                 | action researcher in transition management/innovation studies              | Dutch Research Institute for Transitions                            | Netherlands (the)                                          |
| Boden, Rich                | Associate Head of School, Bacteriologist-Chemist                           | University of Plymouth                                              | United Kingdom of Great Britain and Northern Ireland (the) |
| Bodenbender, Brian         | Professor of Geology and Environmental Science                             | Hope College                                                        | United States of America (the)                             |
| Bodensteiner, Brooke       | PhD student in ecology and evolutionary biology                            | Yale University                                                     | United States of America (the)                             |
| Bodie, Walter              | Chemist                                                                    | Retired                                                             | United States of America (the)                             |
| Bodily, Weston             | Bioinformatics                                                             | Brigham Young University                                            | United States of America (the)                             |
| Bodley, John H.            | Professor Emeritus, Anthropology                                           | Washington State University                                         | United States of America (the)                             |
| Boehm, Robert              | PhD Physics                                                                | DHBW                                                                | Germany                                                    |
| Boehmer, Wendelin          | Postdoctoral Researcher in AI                                              | University of Oxford                                                | United Kingdom of Great Britain and Northern Ireland (the) |
| Boehmer, Hans Juergen      | Professor of Biogeography                                                  | University of the South Pacific                                     | Fiji                                                       |
| Boeing, Wiebke             | Professor in Aquatic Ecology                                               | New Mexico State University                                         | United States of America (the)                             |
| BOEIRA, Sergio Luis        | Professor; métodos qualitativos de pesquisa                                | UFSC                                                                | Brazil                                                     |
| Boelhouwers, Jan           | Professor in Geography                                                     | Uppsala University                                                  | Sweden                                                     |
| Boer, Matthias             | Professor                                                                  | Western Sydney University, Hawkesbury Institute for the Environment | Australia                                                  |
| Böer, Tim                  | Master Student: Life Sciences                                              | Institute for Microbiology and Genetics                             | Germany                                                    |
| Boeri Erba, Elisabetta     | Analytical chemistry and structural biology                                | IBS                                                                 | France                                                     |
| Boerma, Marjan             | Associate Professor, Radiation Biology                                     | –                                                                   | United States of America (the)                             |
| Boero, Ferdinando          | Professor of zoology                                                       | Università di Napoli Federico II                                    | Italy                                                      |

|                                  |                                                       |                                                                                   |                                                            |
|----------------------------------|-------------------------------------------------------|-----------------------------------------------------------------------------------|------------------------------------------------------------|
| Boët, Philippe                   | Director of research                                  | IRSTEA                                                                            | France                                                     |
| Boetius, Antje                   | oceanographer                                         | Alfred Wegener Institute, Helmholtz Center for Polar and Marine Research          | Germany                                                    |
| Boettger-Tong, Holly             | Professor of Biology                                  | Wesleyan College                                                                  | United States of America (the)                             |
| BOGEAT-TRIBOULOT, Marie-Béatrice | Forest ecophysiolgologist                             | INRA                                                                              | France                                                     |
| Boggero, Angela                  | Researcher - Biology                                  | CNR - Water Research Institute, Verbania                                          | Italy                                                      |
| Boggs, Carol                     | Professor, Ecology & Evolution                        |                                                                                   | United States of America (the)                             |
| Bogin, Barry                     | Professor Biological Anthropology                     | Loughborough University                                                           | United Kingdom of Great Britain and Northern Ireland (the) |
| Boglino, Anais Deborah           | FTPR                                                  | UPEN                                                                              | Mexico                                                     |
| Bogoni, Juliano                  | Postdoc research                                      | UNIVERSIDADE DE SAO PAULO                                                         | Brazil                                                     |
| Bohi, Aminr                      | Postdoc in computer vision and image processing       | Institut of Neurosciences of la Timone                                            | France                                                     |
| Bohigas, Joaquin                 | Full professor/Astronomy                              | UNAM                                                                              | Mexico                                                     |
| Bohle, Martin                    | Ronin Research Scholar / Geoethics                    | European Commission                                                               | Germany                                                    |
| Bohlin-Nizzetto, Pernilla        | Senior Scientist, Environmental Science               | NILU - Norwegian Institute for Air Research                                       | Norway                                                     |
| Böhm, Johannes                   | Environmental Science and Technology                  |                                                                                   | Germany                                                    |
| Böhm, Birgit                     | Senior Researcher, Work, Technology and Participation | Technische Universität Berlin, Institute of Vocational Education and Work Studies | Germany                                                    |
| Bohn, Amabily                    | Student - Msc Botany                                  | UFPR                                                                              | Brazil                                                     |
| Bohn, Friedrich                  | PostDoc                                               | Helmholtz Centre for Environmental Research - UFZ                                 | Germany                                                    |
| Bohnhoff, Marco                  | Professor for Experimental and Borehole Seismology    | GFZ Potsdam /FU Berlin                                                            | Germany                                                    |
| Bois, Paul                       | Assistant Professor                                   | ENGES                                                                             | France                                                     |
| Boisseaux, Marion                | PhD student in tropical ecology                       | University of Guyane                                                              | French Guiana                                              |
| Boissonnet, Tom                  | PhD Student / Neurobiology                            | EMBL Rome                                                                         | Italy                                                      |
| Boivin, Thomas                   | Researcher in forest ecology                          | I.N.R.A.                                                                          | France                                                     |
| Boix, Dani                       | Associate Professor                                   | Institute of aquatic Ecology - University of Girona                               | Spain                                                      |
| Bojadzija Savic, Gorenka         | PhD student                                           |                                                                                   | France                                                     |
| Böke, Ulrich                     | Electric Engineering                                  | Signify Research                                                                  | Germany                                                    |
| Boldgiv, Bazartseren             | Professor of Biology                                  | National University of Mongolia                                                   | Mongolia                                                   |
| Bolger, Thomas                   | Full Professor of Zoology                             | University College Dublin                                                         | Ireland                                                    |
| Bolger, Paul                     | Environmental Science                                 | University College Cork                                                           | Ireland                                                    |
| Böll, Susanne                    | Biologist                                             | Bavarian Institute for Viticulture and Horticulture                               | Germany                                                    |
| Bollinger, Dominique             | Professor in environmental engineering                | HEIG-VD                                                                           | Switzerland                                                |
| Bolognin, Marco                  | PhD candidate                                         | TU Delft                                                                          | Netherlands (the)                                          |
| Bolt Botnen, Amanda              | PhD student                                           | University of Copenhagen                                                          | Denmark                                                    |
| Bolton, John J.                  | Emeritus Professor and algal biologist                | University of Cape Town                                                           | South Africa                                               |
| Bolzonella, Cristian             | Phd                                                   | Padula university                                                                 | Italy                                                      |
| Bomblat, Christian               | Environmental Scientist                               | City of Kleve + Simón I. Patiño University, Cochabamba Bolivia                    | Germany                                                    |
| Bomfim, Barbara                  | Postdoctoral Fellow                                   | University of Oregon, Eugene                                                      | United States of America (the)                             |
| BOMFIM, JAMILLE                  | University Analyst                                    | Universidade Estadual de Santa Cruz                                               | Brazil                                                     |

|                             |                                                       |                                                                                                                           |                                                            |
|-----------------------------|-------------------------------------------------------|---------------------------------------------------------------------------------------------------------------------------|------------------------------------------------------------|
| Bomphrey, Richard           | Professor                                             | Royal Veterinary College                                                                                                  | United Kingdom of Great Britain and Northern Ireland (the) |
| Bon, Stefan                 | Professor of polymer and colloid chemical engineering | The University of Warwick                                                                                                 | United Kingdom of Great Britain and Northern Ireland (the) |
| BON, Richard                | Assistant Professor                                   | Université Paul Sabatier- Toulouse III                                                                                    | France                                                     |
| Bonaccorso, Elisa           | Professor-Researcher/Biology                          | Universidad San Francisco de Quito                                                                                        | Ecuador                                                    |
| Bonal, Mathias              | PhD in Agronomic Sciences and Bioengineering          | Université Libre de Bruxelles                                                                                             | Belgium                                                    |
| Bonari, Gianmaria           | Postdoctoral researcher                               | Department of Botany and Zoology, Masaryk University                                                                      | Czech Republic (the)                                       |
| Bonasia, Grazia             | Biology                                               |                                                                                                                           | Italy                                                      |
| Bonatto, Sandro             | Professor of Evolutionary Genetics                    | PUCRS                                                                                                                     | Brazil                                                     |
| Bond, Kathryn               | Geoscientist                                          |                                                                                                                           | United Kingdom of Great Britain and Northern Ireland (the) |
| Bond, Alexander             | Senior Curator in Charge of Birds                     | The Natural History Museum                                                                                                | United Kingdom of Great Britain and Northern Ireland (the) |
| Bond, Monica                | Wildlife Biology                                      | Wild Nature Institute                                                                                                     | United States of America (the)                             |
| Bondé, Loyapin              | PhD in plant Biology and Ecology                      | Université Joesph Ki-Zerbo                                                                                                | Burkina Faso                                               |
| Bondeau, Alberte            | senior scientist                                      | CNRS                                                                                                                      | France                                                     |
| BONET, ANDREU               | Professor, Department of Ecology                      | UNIVERSIDAD DE ALICANTE                                                                                                   | Spain                                                      |
| BONFANTE, PAOLA             | Professor Emerita-Plant biology                       | University of Torino, Department of Life Sciences and Systems Biology                                                     | Italy                                                      |
| Bonfim, Fernando            | PhD Student/Ecology                                   | Universidade Estadual de Santa Cruz                                                                                       | Brazil                                                     |
| Bongers, Frans              | professor tropical forest ecology                     | Wageningen University & Research                                                                                          | Netherlands (the)                                          |
| Bongs, Gerd                 | scientific consultant / food chemist                  | Dr. Gerd Bongs scientific consulting                                                                                      | Germany                                                    |
| Bonhomme, François          | Population Genetics                                   | CNRS                                                                                                                      | France                                                     |
| Bonilla Barbosa, Jaime Raúl | Director del Centro de investigaciones Biológicas     | Universidad Autónoma del Estado de Morelos                                                                                | Mexico                                                     |
| Bonin, Aurélie              | Postdoctoral researcher in ecology                    | University of Milan                                                                                                       | Italy                                                      |
| Bonisoli-Alquati, Andrea    | Assistant Professor                                   | California State Polytechnic University, Pomona                                                                           | United States of America (the)                             |
| Bonitz, Steffen             | medical doctor                                        | Sophien- und Hufelandklinikum Weimar                                                                                      | Germany                                                    |
| Bonizzoni, Silvia           | Executive director - Marine biologist                 | Dolphin Biology and Conservation                                                                                          | Italy                                                      |
| Bonkowski, Michael          | Professor of Terrestrial Ecology                      | University of Cologne, Department of Biology                                                                              | Germany                                                    |
| Bonn, Aletta                | Professor                                             | Helmholtz-Centre for Environmental Research - UFZ / German Centre for integrative Biodiversity Research (iDiv) / FSU Jena | Germany                                                    |
| Bonneaud, Camille           | Associate Professor                                   | University of Exeter                                                                                                      | United Kingdom of Great Britain and Northern Ireland (the) |
| Bonnefond, Pascal           | researcher / Geodesy                                  | Observatoire de Paris - SYRTE                                                                                             | France                                                     |
| Bonnell, Tyler              | Postdoctoral researcher behavioural ecology           | University of Lethbridge                                                                                                  | Canada                                                     |
| Bonnemain, Thibault         | PhD student, Theoretical Physics                      | LPTMS                                                                                                                     | France                                                     |
| Bonnet, Marie-Paule         | Researcher, hydrology                                 | Institut de Recherche pour le Développement                                                                               | France                                                     |
| BONNET-BEAUGRAND, Florence  | Assistant professor                                   | UMR BIOEPAR                                                                                                               | France                                                     |
| BONNEU, MARC                | PROFESSOR OF BIOTECHNOLOGY                            | BORDEAUX INP                                                                                                              | France                                                     |

|                          |                                                               |                                                                    |                                                            |
|--------------------------|---------------------------------------------------------------|--------------------------------------------------------------------|------------------------------------------------------------|
| Bonneville, Jean-Marc    | CNRS searcher, biologist: Mosquito resistance to insecticides | Laboratoire d'Ecologie Alpine, UMR 5553, CNRS-UGA, Grenoble        | France                                                     |
| Bonnineau, Chloe         | Researcher in Aquatic Microbial Ecotoxicology                 | Irstea                                                             | France                                                     |
| Bonnington, Rachel       | PhD Student, Developmental Neurobiology                       | University College London                                          | United Kingdom of Great Britain and Northern Ireland (the) |
| Bonnot, Nadège           | PhD in Ecology                                                | IRSTEA                                                             | France                                                     |
| Bonnot, Clemence         | Researcher in Plant biology                                   | INRA                                                               | France                                                     |
| Bonomi, Ernesto          | Director HPC for Energy & Environment                         | CRS4                                                               | Italy                                                      |
| Bonsdorff, Erik          | Professor of marine biology                                   | Åbo Akademi University                                             | Finland                                                    |
| Bontadina, Fabio         | Senior researcher, PhD                                        | SWILD - Urban Ecology & Wildlife Research                          | Switzerland                                                |
| Bonte, Dries             | Professor Ecology & Evolution, EiC Oikos                      | Ghent University                                                   | Belgium                                                    |
| Bontemps, Jean-Daniel    | Research director                                             | IGN                                                                | France                                                     |
| Bontemps, Sylvain        | Directeur de recherche, Astrophysics                          | CNRS, Laboratoire d'astrophysique de Bordeaux                      | France                                                     |
| Bonthoux, Sébastien      | Associate professor                                           | INSA Centre Val de Loire - UMR CITERES                             | France                                                     |
| Bontonou, Gwénaëlle      | Postdoc                                                       |                                                                    | Switzerland                                                |
| Bonvegna, Miryam         | Phd student                                                   | University of Turin                                                | Italy                                                      |
| Bony, sylvie             | senior research scientist                                     | INRAE                                                              | France                                                     |
| Bood, Nadia              | Climate Change Officer and Marine Scientist                   | World Wildlife Fund                                                | Belize                                                     |
| Boone, Aaron             | Resercher in Hydrology and Meteorology                        | CNRM Météo-France, CNRS                                            | France                                                     |
| Boone, Frédéric          | researcher in astrophysics                                    | IRAP - Observatoire Midi-Pyrénées - CNRS - Université Toulouse III | France                                                     |
| boonekamp, jelle         | Post-doctoral researcher ecophysiology (Marie-Curie fellow)   | University of Exeter                                               | United Kingdom of Great Britain and Northern Ireland (the) |
| Booth, Simon             | PhD Student in Biochemistry                                   | Newcastle University                                               | United Kingdom of Great Britain and Northern Ireland (the) |
| Booth, Adam              | Associate Professor in Applied Geophysics                     | University of Leeds                                                | United Kingdom of Great Britain and Northern Ireland (the) |
| Booth, Carey             | Biology                                                       | Reed College                                                       | United States of America (the)                             |
| Booth, Genevieve         | Medical Doctor (Paediatrics)                                  |                                                                    | United Kingdom of Great Britain and Northern Ireland (the) |
| Booth, Jamie             | Theoretical Physics                                           | RMIT University                                                    | Australia                                                  |
| Booth, David             | Marie Ecology                                                 | University of Technology Sydney                                    | Australia                                                  |
| Bopage, Malaka           | Asst. Manager., Field team and Community development          | The Rain forest ecolodge                                           | Sri Lanka                                                  |
| Bopp, Joshua             | scientific assistant in bioinformatics                        | University of Würzburg                                             | Germany                                                    |
| Boquete Seoane, M Teresa | Postdoctoral Researcher                                       | EBD-CSIC                                                           | Spain                                                      |
| Borba, Gabriel           |                                                               | INPA                                                               | Brazil                                                     |
| Borchert, Amanda         | Biologist                                                     |                                                                    | United States of America (the)                             |
| Bordat, Frederic         | Mathematics                                                   | CNRS                                                               | France                                                     |
| Bordehore, Cesar         | Associate Professor Ecology                                   | University of Alicante                                             | Spain                                                      |
| Borden, Jesse            | Graduate Research Assistant in Ecology                        | University of Florida                                              | United States of America (the)                             |
| Borderie, Fabien         | University teacher in Biology                                 | Université de Bourgogne Franche-Comté                              | France                                                     |

|                            |                                                                           |                                                                   |                                                            |
|----------------------------|---------------------------------------------------------------------------|-------------------------------------------------------------------|------------------------------------------------------------|
| Borderon, Marion           | Geography                                                                 | University of Vienna                                              | Austria                                                    |
| Bordeyne, François         | Post-doc                                                                  | Sorbonne Université                                               | France                                                     |
| Bordin, Luís Henrique      | PhD Student                                                               | Universidade Federal do Rio Grande                                | Brazil                                                     |
| Bordini, Allison           | Biology                                                                   | University of Florida                                             | United States of America (the)                             |
| Bordjan, Dejan             | Research assistant                                                        | University of Ljubljana, Biotechnical Faculty, Dept. for Forestry | Slovenia                                                   |
| Borger, Luca               | Professor - Chair in Ecology and Biodiversity                             | Swansea University                                                | United Kingdom of Great Britain and Northern Ireland (the) |
| Borges, Rebecca            | PhD researcher                                                            | ZMT                                                               | Germany                                                    |
| Borges, Rui                | Postdoc                                                                   | VetmeduniVienna                                                   | Austria                                                    |
| BORGES, RAFAEL             | Researcher / Environmental Sciences                                       | Unilasalle                                                        | Brazil                                                     |
| Borges de Amorim, Pablo    | Postdoctoral researcher, Impacts of Climate Change on the Water Resources | Federal University of Santa Catarina (UFSC)                       | Brazil                                                     |
| Borges Pedro, João Paulo   | Rural Sanitation Researcher                                               | Mamirauá Institute for Sustainable Development                    | Brazil                                                     |
| Boris, Fumanal             | Associate professor in Ecology                                            | Université Clermont Auvergne - UMR PIAF 547                       | France                                                     |
| Borja, Angel               | Principal Investigator                                                    | AZTI                                                              | Spain                                                      |
| Bork, Marcus               | PhD student, Soil Ecology and Hydrology                                   | University of Freiburg                                            | Germany                                                    |
| Borkent, Christopher       | Entomologist, Systematics                                                 |                                                                   | United States of America (the)                             |
| Borkent, Art               | Research Scientist                                                        | Research Associate of the American Museum of Natural History      | Canada                                                     |
| Borràs, Antoni             | Ornithology                                                               | Museu de Ciències Naturals de Barcelona                           | Spain                                                      |
| Borràs Calvo, Gabriel      | Biologist                                                                 | Catalan Office for Climate Change                                 | Andorra                                                    |
| Borras-Chavez, Renato      | Research Associated                                                       | CAPES- Pontificia Universidad Católica                            | Chile                                                      |
| Borregaard, Michael Krabbe | Associate Professor, Ecology/Biodiversity                                 | University of Copenhagen                                          | Denmark                                                    |
| Borrmann, Stephan          | University Professor/ Atmospheric Physics                                 | Johannes Gutenberg University                                     | Germany                                                    |
| Borry, Maxime              | Doctoral Researcher in Bioinformatics                                     | Max Planck Institute for Evolutionary Anthropology                | Germany                                                    |
| Borsari, Bruno             | Professor of Biology (Emeritus)/Agroecology                               | Winona State University                                           | United States of America (the)                             |
| Bortone, Stephen           | Environmental Consultant                                                  | Osprey Aquatic Sciences, LLC                                      | United States of America (the)                             |
| Bos, Wouter                | Master Student Computer Science                                           | University of Twente                                              | Netherlands (the)                                          |
| Bosbach, Gerd              | Prof. em. Statistics and Mathematics                                      | Hochschule Koblenz                                                | Germany                                                    |
| Bosc, Alexandre            | Forest Ecophysiologicalist                                                | INRA                                                              | France                                                     |
| Bosc, Christopher          | Ecology                                                                   |                                                                   | France                                                     |
| Bosch, Dr. Stefan          | anesthesiologist, ornithologist and naturalist                            | freelancer                                                        | Germany                                                    |
| Boscheinen, Jens           | PhD                                                                       | University of Neu-Ulm                                             | Germany                                                    |
| Bosco, Joseph              | Research Associate, Anthropology                                          | Washington University in St Louis                                 | United States of America (the)                             |
| Bose, Shroddha             | PhD Student                                                               | Freie Universitaet Berlin                                         | Germany                                                    |
| Bosques, Teresa            | Lecturer in Environmental Sciences                                        | UMDI- Facultad de Ciencias-Campus Juriquilla, UNAM                | Mexico                                                     |
| Böß, Tilmann               | IT network engineer / physics                                             |                                                                   | Germany                                                    |
| Bossart, Raphaël           | Lab technician                                                            | EAWAG                                                             | Switzerland                                                |
| Bosse, Mirte               | Postdoctoral researcher                                                   | Wageningen University & Research                                  | Netherlands (the)                                          |

|                          |                                                                                    |                                                                                                                                                     |                                |
|--------------------------|------------------------------------------------------------------------------------|-----------------------------------------------------------------------------------------------------------------------------------------------------|--------------------------------|
| Bosson, Jean-Baptiste    | Glaciology - Geography                                                             | Conservatory of protected areas of Haute-Savoie, IUCN                                                                                               | France                         |
| Bostelmann, Enrique      | Profesor Adjunto Ad Honorem                                                        | Instituto de Ciencias de la Tierra, Universidad Austral de Chile                                                                                    | Chile                          |
| Boston, Tony             | PhD student, Fenner School                                                         | Australian National University                                                                                                                      | Australia                      |
| Botero Trujillo, Ricardo | Postdoctoral Researcher                                                            | American Museum of Natural History                                                                                                                  | United States of America (the) |
| Botha, Hannes            | Herpetofauna Scientist                                                             | Mpumalanga Tourism and Parks Agency                                                                                                                 | South Africa                   |
| Botha, Jenny             | Manager: People In Conservation Programme, Sustainable Development, Social Ecology | The Endangered Wildlife Trust                                                                                                                       | South Africa                   |
| Botías, Cristina         | Research Fellow                                                                    | Instituto Regional de Investigación y Desarrollo Agroalimentario y Forestal de Castilla La Mancha (IRIAF), CIAPA de Marchamalo (Guadalajara, Spain) | Spain                          |
| Boto, Luis               | Researcher in Evolution                                                            | Museo Nacional de Ciencias Naturales. CSIC                                                                                                          | Spain                          |
| Botta-Dukát, Zoltan      | senior researcher                                                                  | MTA Centre for Ecological Research                                                                                                                  | Hungary                        |
| Bottero, Alexis          | Post-doc, ocean acoustics                                                          | Scripps Institution of Oceanography                                                                                                                 | United States of America (the) |
| Bottjer-Wilson, Daniela  | Junior Specialist/Faculty Development & Oceanography                               | University of Hawai ‘i at Mānoa                                                                                                                     | United States of America (the) |
| Bou, Jordi               | Professor                                                                          | University of Girona                                                                                                                                | Spain                          |
| Bouarakia, Oussama       | PhD Researcher in Zoology and Genetics                                             | Faculty of Sciences, Mohammed V University in Rabat                                                                                                 | Morocco                        |
| Bouchard, Colin          | Post-doctoral researcher                                                           | UMR Ecobiop, INRA, Univ Pau & Pays Adour                                                                                                            | United States of America (the) |
| Boucher, Jean            | Environmental Sociology                                                            | Arizona State University                                                                                                                            | Canada                         |
| Boucher, Olivier         | Climate scientist                                                                  | Institut Pierre-Simon Laplace                                                                                                                       | France                         |
| BOUCHER, Francois        | territory development                                                              | former CIRAD                                                                                                                                        | Mexico                         |
| Bouchet, francois        | Astrophysicist                                                                     | CNRS                                                                                                                                                | France                         |
| Bouchet, Freddy          | Climate scientist. Physicist.                                                      | CNRS and Ecole Normale Supérieure de Lyon                                                                                                           | France                         |
| Bouchet-Mayer, Cyriac    | PhD student in sociologie                                                          | Montpellier Univ.                                                                                                                                   | France                         |
| Bouchet-Valat, Milan     | Researcher in Sociology                                                            | French Institute for Demographic Studies (Ined)                                                                                                     | France                         |
| Bouckaert, Julie         | Senior Researcher                                                                  | CNRS                                                                                                                                                | France                         |
| Bouckaert, julie         | Senior Researcher                                                                  | Centre National de la Recherche Scientifique                                                                                                        | France                         |
| Boud, James              | Software Engineer/Computing and Mathematical Sciences                              | Meteorological Service of New Zealand Limited                                                                                                       | New Zealand                    |
| Bouda, Martin            | Post-doctoral Fellow                                                               | Catholic University of Louvain                                                                                                                      | Czech Republic (the)           |
| BOUDSOCQ, François       | Researcher in Biology                                                              | CNRS                                                                                                                                                | France                         |
| Bouet, Jean-Yves         | Research Director at CNRS, Molecular Genetics and Microbiology                     | Centre National de la Recherche Scientifique                                                                                                        | France                         |
| Bouffard, Mathieu        | Postdoctoral researcher (CNRS) - geophysics                                        | IRPHE, Marseille                                                                                                                                    | France                         |
| Boufford, David          | Senior Research Scientist                                                          | Harvard University Herbaria                                                                                                                         | United States of America (the) |
| Bouldin, Erin            | Assistant Professor, Epidemiology                                                  | Appalachian State University                                                                                                                        | United States of America (the) |
| Bouldin, Courtney        | Assistant Professor of Biology                                                     | Appalachian State University                                                                                                                        | United States of America (the) |
| Boulding, Elizabeth      | Professor Integrative Biology                                                      | University of Guelph                                                                                                                                | Canada                         |
| BOULLIS, Antoine         | PhD in Entomology                                                                  |                                                                                                                                                     | France                         |

|                           |                                                                           |                                                                                    |                                                            |
|---------------------------|---------------------------------------------------------------------------|------------------------------------------------------------------------------------|------------------------------------------------------------|
| Boulogne, François        | CNRS researcher (Soft condensed matter physics)                           | Laboratoire de Physique des Solides, Université Paris Sud                          | France                                                     |
| Boulton, Rebecca          | Post-doctoral research fellow in Evolutionary Biology                     | University of Exeter                                                               | United Kingdom of Great Britain and Northern Ireland (the) |
| Bouma, Esther             | Researcher Human-Animal interactions (Social Sciences)                    | University of Groningen                                                            | Netherlands (the)                                          |
| Bouman, Roderick          | PhD student, Evolutionary biology and plant systematics                   | Hortus botanicus Leiden                                                            | Netherlands (the)                                          |
| Bounas, Anastasios        | Biologist, Phd                                                            | University of Ioannina                                                             | Greece                                                     |
| Bouquet, Yaëlle           | Primatology                                                               | University of Neuchâtel                                                            | Switzerland                                                |
| Bouquet, Alexis           | Planetary Scientist                                                       |                                                                                    | France                                                     |
| Bourdon, Pierre-Antoine   | PhD                                                                       | Swansea University                                                                 | United Kingdom of Great Britain and Northern Ireland (the) |
| Bourg, Salomé             | PhD student in evolutionary biology                                       | LBBE- University of Lyon                                                           | France                                                     |
| Bourgatte, Guillaume      | Phd student in particle physics                                           | IPHC                                                                               | France                                                     |
| Bourgeois, Yann           | Research associate/Biology                                                |                                                                                    | United Arab Emirates (the)                                 |
| Bourgeois, Timothée       | Postdoctoral fellow, Oceanography                                         | Dalhousie University                                                               | Canada                                                     |
| Bourlat, Sarah            | Researcher, Biologist                                                     | Zoological Museum Alexander Koenig, Bonn                                           | Germany                                                    |
| Bourlès, Didier           | Professor                                                                 | Aix-Marseille University                                                           | France                                                     |
| Bourne, Amanda            | Biological Science                                                        | Fitzpatrick Institute for African Ornithology                                      | South Africa                                               |
| Bouruet-Aubertot, Pascale | Professor - Physical oceanography                                         | Sorbonne Université                                                                | France                                                     |
| Bousquet, Antoine         | Associate Professor                                                       | University of Pau                                                                  | France                                                     |
| Bousquet, Emma            | Satellite Image Processing Researcher                                     | CESBIO                                                                             | France                                                     |
| Bousquet, Julie           | Consultant in Ecotourism/Ecodevelopment                                   | Coop'Conseils                                                                      | France                                                     |
| Boussau, Bastien          | Researcher                                                                | CNRS, UMR 5558, Laboratoire de Biométrie et Biologie Evolutive, Université de Lyon | France                                                     |
| BOUTET, Agnès             | maitre de conferences                                                     | Sorbonne Université                                                                | France                                                     |
| BOUTILLIAT, ALEXIS        | biotechnology engineer                                                    | University of Lorraine                                                             | France                                                     |
| Bove, Claudia             | Professor                                                                 | Museu Nacional, Universidade Federal do Rio de Janeiro                             | Brazil                                                     |
| Bovo, Rafael              | Postdoctoral Research Fellow, Departamento de Fisiologia, IB, USP, Brazil | Universidade de Sao Paulo (USP), Brazil                                            | Brazil                                                     |
| Bowden, William B         | Professor of Watershed Science and Planning                               | University of Vermont                                                              | United States of America (the)                             |
| Bower, Amy                | Senior Scientist, Ocean Physics                                           | Woods Hole Oceanographic Institution                                               | United States of America (the)                             |
| Bowkett, Andrew           | Conservation Programmes Manager                                           | Wild Planet Trust                                                                  | United Kingdom of Great Britain and Northern Ireland (the) |
| Bowler, Jonathan          | Ornithologist (PhD)                                                       | Royal Society for the Protection of Birds                                          | United Kingdom of Great Britain and Northern Ireland (the) |
| Bowler, Karen             | Environmental Social Scientist                                            |                                                                                    | United Kingdom of Great Britain and Northern Ireland (the) |
| Bowring, Simon            | Researcher                                                                | LSCE                                                                               | France                                                     |
| Box, John                 | Retired ecologist & environmental manager                                 |                                                                                    | United Kingdom of Great Britain and Northern Ireland (the) |



|                         |                                                       |                                                                        |                                                            |
|-------------------------|-------------------------------------------------------|------------------------------------------------------------------------|------------------------------------------------------------|
| Boyadjian, Celia Helena | Visiting Professor                                    | Museu Nacional/Universidade Federal do Rio de Janeiro (UFRJ)           | Brazil                                                     |
| Boyd, David R.          | Associate Professor of Law, Policy and Sustainability | University of British Columbia                                         | Canada                                                     |
| Boyd, Bill              | Professor of Geography                                | Southern Cross University                                              | Australia                                                  |
| Boyd-Wilson, Kirsty     | Scientist (Plant pathologist)                         |                                                                        | New Zealand                                                |
| Boyer, Ronald           | Depth Psychologist and current Doctoral Student       | Graduate Theological Union & UC Berkeley                               | United States of America (the)                             |
| Boyer, Stéphane         | Professor in Ecology                                  | CNRS / Tours University                                                | France                                                     |
| Boyer, Bert             | Professor, Cardiometabolic disease research           | Oregon Health & Science University                                     | United States of America (the)                             |
| Boyes, Mike             | Associate Professor, Outdoor Education                | University of Otago                                                    | New Zealand                                                |
| Boyland, Natasha        | Fish Policy and Research Manager                      | Compassion in World Farming                                            | United Kingdom of Great Britain and Northern Ireland (the) |
| Boyle, Julie            | Translational Genetics Bioinformatics Analyst         | Huntsman Cancer Institute                                              | United States of America (the)                             |
| Boyle, Sarah            | Associate Professor                                   | Rhodes College                                                         | United States of America (the)                             |
| Boyle, Alice            | Associate Professor/Ecologist                         | Kansas State University                                                | United States of America (the)                             |
| Boyle, Leila            | Senior Tutor, Statistics                              | University of Auckland                                                 | New Zealand                                                |
| Boyle, Ken              | Lecturer in Environmental Management                  | Technological University Dublin                                        | Ireland                                                    |
| Boyne, Jonathan         | Psychology                                            |                                                                        | United States of America (the)                             |
| Bozelli, Reinaldo Luiz  | Full Professor                                        | Universidade Federal do Rio de Janeiro                                 | Brazil                                                     |
| Bozem, Heiko            | Scientist                                             | Johannes Gutenberg University Mainz, Institute for Atmospheric Physics | Germany                                                    |
| Bozeman, Bryan          | Integrative Conservationist                           | University of Georgia                                                  | United States of America (the)                             |
| bozinovic, francisco    | phd                                                   | universidada catolica de chile                                         | Chile                                                      |
| Bozorgomid, Faramarz    | PhD student                                           | Tehran University of medical Sciences                                  | Iran (Islamic Republic of)                                 |
| Bozzi, Laura            | Lecturer                                              | Yale University                                                        | United States of America (the)                             |
| Braby, Justine          | Climate Change, SLM, Zoology, Ecology                 | Progress Namibia                                                       | Namibia                                                    |
| Bracco, Gianangelo      | Associate Professor of Experimental Physics           | Department of Physics - University of Genoa                            | Italy                                                      |
| Bracco, Jean-Pierre     | Professor of Prehistory                               | Aix-Marseille University                                               | France                                                     |
| Brachet, Morgane        | Ph.D. student in Zoology                              | University of Pretoria                                                 | South Africa                                               |
| Brack, Jeffrey          | Particle Astrophysics - retired                       | Colorado State University                                              | United States of America (the)                             |
| Brackzkowski, Alexander | Doctoral researcher - Environmental Science           | University of Queensland                                               | South Africa                                               |
| Braddock, Kathryn       | Associate Scientist                                   | EcoAdapt                                                               | United States of America (the)                             |
| Bradley, Bethany        | Associate Professor of Biogeography                   | University of Massachusetts, Amherst                                   | United States of America (the)                             |
| Bradley, Paul           | Adjunct Assistant Professor                           | University of San Diego                                                | United States of America (the)                             |
| Bradley, James          | Assistant Professor in Environmental Science          | Queen Mary University of London                                        | United Kingdom of Great Britain and Northern Ireland (the) |
| Bradley, Georgienne     | Director, nonprofit conservation organization         | Sea Save Foundation                                                    | United States of America (the)                             |
| Bradshaw, Nicholas      | Assistant Professor / Biotechnology                   | University of Rijeka (Sveuciliste u Rijeci)                            | Croatia                                                    |
| Bradsworth, Nick        | PhD Candidate                                         | Deakin University                                                      | Australia                                                  |
| Brady, Daniel           | Researcher                                            | University of Padua                                                    | Italy                                                      |
| Bragagnolo, Chiara      | Post-doc researcher                                   | Federal University of Bahia                                            | Brazil                                                     |
| Braganza, Oliver        | Postdoc, Neurophysiology and Systems Science          | Institute for Experimental Epileptology and Cognition Research         | Germany                                                    |

|                                    |                                                                  |                                                                   |                                                            |
|------------------------------------|------------------------------------------------------------------|-------------------------------------------------------------------|------------------------------------------------------------|
| Brakes, Philippa                   | Research Fellow                                                  | Whale and Dolphin Conservation                                    | United Kingdom of Great Britain and Northern Ireland (the) |
| Brambach, Fabian                   | Postdoctoral researcher, Biodiversity                            | Georg-August-University Göttingen                                 | Germany                                                    |
| Brambilla, Mattia                  | Research consultant in ecology and biodiversity conservation     | Fondazione Lombardia per l'Ambiente                               | Italy                                                      |
| Branca, Mathieu                    | Assistant professor, Organic Chemistry                           | Université de Paris                                               | France                                                     |
| Branch, George                     | Professor of Marine Biology                                      | University of Cape Town                                           | South Africa                                               |
| Branch, Kristi                     | Senior Research Scientist, sociology                             | Battelle Memorial Institute/Pacific Northwest National Laboratory | United States of America (the)                             |
| Branchu, Priscilla                 | Research associate                                               | INRA                                                              | France                                                     |
| Branco, Manuela                    | Professor Entomology                                             | University of Lisbon                                              | Portugal                                                   |
| Branco de Oliveira Wanderley, Theo | B.Sc and Master Degree Student                                   | Federal Rural University of Pernambuco                            | Brazil                                                     |
| Brand, Charlotte                   | Biosciences Research Associate                                   | University of Exeter                                              | United Kingdom of Great Britain and Northern Ireland (the) |
| Brand Correa, Lina                 | Research Fellow                                                  | University of Leeds                                               | United Kingdom of Great Britain and Northern Ireland (the) |
| Brandão, Reuber                    | Associate Professor - Animal Ecology and Conservation            | University of Brasília                                            | Brazil                                                     |
| Brandimarte, Ana                   | Professor - Ecology                                              | University of Sao Paulo                                           | Brazil                                                     |
| Brandon, Katrina                   | Ph. D. Conservation Science                                      | consultant; formerly Conservational International                 | United States of America (the)                             |
| Brändström, Johan                  | PhD Circular Economy                                             | Environmental Engineering                                         | Sweden                                                     |
| Brandt, Kasper                     | PhD candidate                                                    | Swansea University                                                | United Kingdom of Great Britain and Northern Ireland (the) |
| Brandt, Renata                     | Evolutionary Biologist and Science Communicator                  | Laurentian University                                             | Canada                                                     |
| Brandt, Alexander                  | Evolutionary Biology                                             | JF Blumenbach Institute Goettingen                                | Germany                                                    |
| Branger, Hubert                    | Researcher                                                       | CNRS                                                              | France                                                     |
| Branquinho, Cristina               | Professor of Ecology                                             | Faculdade de Ciências da Universidade de Lisboa                   | Portugal                                                   |
| Brans, Kristien                    | Post-doctoral researcher Urban Evolutionary Biology (Freshwater) | KU Leuven                                                         | Belgium                                                    |
| Bras, Nicolas                      | Phd student                                                      | Lorraine University                                               | France                                                     |
| Bras, Audrey                       | Ecology                                                          | inra                                                              | France                                                     |
| BRAS-GONCALVES, Rachel             | scientist                                                        | IRD                                                               | France                                                     |
| BRASCHI, Julie                     | PhD student                                                      | IMBE                                                              | France                                                     |
| Brasseur, Pierre                   | CNRS Senior Research Scientist, Oceanography                     | IGE, Institute of Geosciences and Environmental research          | France                                                     |
| Brassine, Mathilde                 | Zoology MSc                                                      | Rhodes University                                                 | South Africa                                               |
| Brassine, Alienor                  | Zoology and Ecology                                              | Rhodes University                                                 | South Africa                                               |
| Brau-Nogué, Sylvie                 | Research Engineer / Software                                     | CNRS                                                              | France                                                     |
| Braud, Isabelle                    | Senior researcher                                                | Irstea                                                            | France                                                     |
| Brauer, Anthony                    | Systems Science                                                  | Independent                                                       | United Kingdom of Great Britain and Northern Ireland (the) |
| Braun, Michael                     | Research Scientist, Evolutionary Genomics                        | National Museum of Natural History                                | United States of America (the)                             |

|                             |                                                            |                                                                       |                                                            |
|-----------------------------|------------------------------------------------------------|-----------------------------------------------------------------------|------------------------------------------------------------|
| Braun, Roman                | Researcher                                                 | Fraunhofer Institute for Wind Energy Systems                          | Germany                                                    |
| Braun, Marius               | Economics PhD student                                      | Justus Liebig University Giessen                                      | Germany                                                    |
| Braun, Hans-Peter           | Professor for Plant Genetics, Head of Department           | Leibniz Universität Hannover                                          | Germany                                                    |
| Bräunlich, Gerhard          | Scientific Computing Expert                                | ETH Zürich                                                            | Switzerland                                                |
| Brauser, Alexander          | Research Associate / Geography and Computer Science        | Helmholtz Centre Potsdam - GFZ German Research Centre for Geosciences | Germany                                                    |
| Bravo, Adriana              | CLTA Assistant Professor, Teaching Stream                  | University of Toronto                                                 | Canada                                                     |
| Bravo, Felipe               | Professor of Forest Management                             | iuFOR, Universidad de Valladolid                                      | Spain                                                      |
| Bravo, Giangiacomo          | Professor                                                  | Linnaeus University                                                   | Sweden                                                     |
| Bravo Anaya, Lourdes Mónica | Dr. physical chemistry                                     | Université Grenoble Alpes                                             | France                                                     |
| Brawn, Jeffrey              | Emeritus Professor in Ecology and Sustainability           | University of Illinois at Urbana-Champaign                            | United States of America (the)                             |
| Bray, Tim                   | Lecturer in Conservation Biology                           | Bristol Zoological Society                                            | United Kingdom of Great Britain and Northern Ireland (the) |
| Bray, David                 | Professor                                                  | Florida International University                                      | United States of America (the)                             |
| Brayne, Kitty               | Community based marine conservation - project manager      | Blue Ventures                                                         | United Kingdom of Great Britain and Northern Ireland (the) |
| Brayshaw, Drew              | Senior Hydrologist and Geoscientist                        | Statlu Environmental Consulting Ltd.                                  | Canada                                                     |
| Braz, Alan                  | PhD candidate in ecology                                   | Universidade Federal do Rio de Janeiro                                | Brazil                                                     |
| Braz, Henrique              | Postdoctoral Fellow/Zoology                                | Instituto Butantan                                                    | Brazil                                                     |
| Brazier, Anna               | Researcher MSc Sustainable Development                     | Research Advocacy Unit                                                | Zimbabwe                                                   |
| Breadsell, Jess             | Researcher                                                 | Curtin University sustainability policy institute                     | Australia                                                  |
| Brede, Benjamin             | Postdoc in Remote Sensing                                  | Wageningen University & Research                                      | Netherlands (the)                                          |
| Bredski, Joanna             | Consultant Psychiatrist                                    | NHS                                                                   | United Kingdom of Great Britain and Northern Ireland (the) |
| Breed, Andrew               | Veterinary Epidemiology                                    | University of Queensland                                              | Australia                                                  |
| Breed, Martin               | Lecturer (Ecology)                                         | Flinders University                                                   | Australia                                                  |
| Breed, Bill                 | Emerits Professor                                          | University of Adelaide                                                | Australia                                                  |
| Breitenmoser, Urs           | Senior scientist, ecologist                                | Univ. Bern                                                            | Switzerland                                                |
| Brenard, Nathalie           | PhD student, biology                                       | University of Antwerp                                                 | Belgium                                                    |
| Brendel, Heiko              | Senior Lecturer (Digital Humanities/Military History)      | University of Passau                                                  | Germany                                                    |
| Brendel, Kilian             | Physics                                                    | Freiburg University                                                   | Germany                                                    |
| Brendel, Oliver             | Scientist / Plant Ecophysiology                            | INRA                                                                  | France                                                     |
| Brendel, Esther             | Biology and Psychology                                     | Johannes Gutenberg Universität Mainz                                  | Germany                                                    |
| Brennan, David              | Virologist                                                 | AgriFood and Biosciences Institute                                    | United Kingdom of Great Britain and Northern Ireland (the) |
| Brennan, Peter              | Academic Director, Sustainability and Environmental Action | SIT Study Abroad,                                                     | Australia                                                  |
| Brenowitz, Eliot            | Professor of Biology                                       | University of Washington                                              | United States of America (the)                             |
| Brent, Linda                | Executive Director                                         | Parsemus Foundation                                                   | United States of America (the)                             |
| Brentner, Laura             | PhD, Environmental Science                                 | Loyola University Chicago                                             | United States of America (the)                             |
| Bretagnolle, Vincent        | Scientist                                                  | CNRS                                                                  | France                                                     |
| BRETAGNOLLE, François       | Professor of ecology                                       | University                                                            | France                                                     |

|                            |                                                       |                                                        |                                                            |
|----------------------------|-------------------------------------------------------|--------------------------------------------------------|------------------------------------------------------------|
| Breton, Florentin          | PhD student                                           | LSCE (IPSL)                                            | France                                                     |
| Breton, Catherine          | Researcher Data Scientist Bioinformatic and evolution | Bioversity                                             | France                                                     |
| Bretscher, Anthony         | Professor, Molecular Biology and Genetics             | Cornell University                                     | United States of America (the)                             |
| Breuer, Lutz               | Prof. for Landscape, Water and Biogeochemical Cycles  | Justus Liebig University Giessen                       | Germany                                                    |
| Breunig, Peter             | Professor                                             | Weihenstephan-Triesdorf University of Applied Sciences | Germany                                                    |
| Breure, Abraham            | Research Associate                                    | Naturalis Biodiversity Center Leiden                   | Netherlands (the)                                          |
| Breure, Timo               | Doctoral student                                      | Rothamsted Research                                    | United Kingdom of Great Britain and Northern Ireland (the) |
| BREUZARD, Jeremy           | Organic Chemistry Teacher                             | CPE Lyon                                               | France                                                     |
| Brewer, David              | Director                                              | Upwelling PL                                           | Australia                                                  |
| Brewis, Catherine          | Primate conservation                                  | Oxford Brookes university                              | United Kingdom of Great Britain and Northern Ireland (the) |
| Brewster, Clare            | PhD plant science and air pollution                   | UKCEH                                                  | United Kingdom of Great Britain and Northern Ireland (the) |
| Breyton, Cécile            | Research Director / Biology                           | CNRS                                                   | France                                                     |
| Briatte, François          | Assistant Lecturer in Political Science               | ESPOL Lille & Sciences Po                              | France                                                     |
| Brice, Justin              | GIS Analyst/Wildlife Biologist                        | Conservation Biology Institute                         | United States of America (the)                             |
| Briegel, Ramón             | Research Associate, Transportation Planning           | University of Kassel                                   | Germany                                                    |
| Briens, François           | Socio-ecological economist and energy analyst         |                                                        | France                                                     |
| Briers, Rob                | Head of Life Sciences                                 | Edinburgh Napier University                            | United Kingdom of Great Britain and Northern Ireland (the) |
| Brightman, Marc            | Professor of Anthropology                             | University of Bologna                                  | Italy                                                      |
| Brilli, Ylenia             | Postdoc in Economics                                  | University of Verona                                   | Italy                                                      |
| Brinker, Pina              | PhD                                                   | University of Groningen                                | Netherlands (the)                                          |
| Brinker, Alexander         | Fish biology                                          | Fisheries Research Station                             | Germany                                                    |
| Brinkhoff, Rose            | PhD student, Plant ecology                            | University of Tasmania                                 | Australia                                                  |
| Briones, Maria J. I.       | Professor of Zoology                                  | Universidad de Vigo                                    | Spain                                                      |
| Briottet, Xavier           | Director of Research                                  | ONERA                                                  | France                                                     |
| Brisola Constantino, Pedro | PhD. Student                                          | IB-USP                                                 | Brazil                                                     |
| Brisse, Sylvain            | Research Director                                     | Institut Pasteur                                       | France                                                     |
| Bristow, Keith             | Senior Principal Research Scientist                   | CSIRO                                                  | Australia                                                  |
| Bristow, David             | Retired. Graduate in mathematics and psychology       |                                                        | United Kingdom of Great Britain and Northern Ireland (the) |
| Brito, Jose A.             | Research Fellow                                       | ITQB NOVA                                              | Portugal                                                   |
| Brito, José Carlos         | Principal researcher / Biological sciences            | CIBIO/InBIO, University of Porto                       | Portugal                                                   |
| Britto, Marcelo            | Professor                                             | Museu Nacional, Universidade Federal do Rio de Janeiro | Brazil                                                     |
| Britton, Jess              | Research Fellow                                       | University of Exeter                                   | United Kingdom of Great Britain and Northern Ireland (the) |
| Britton, Sébastien         | Research Associate in Cancer research                 | CNRS                                                   | France                                                     |
| Britton, Damon             | PhD candidate                                         | University of Tasmania                                 | Australia                                                  |

|                      |                                                                              |                                                                 |                                                            |
|----------------------|------------------------------------------------------------------------------|-----------------------------------------------------------------|------------------------------------------------------------|
| Brivio, Francesca    | PostDoc                                                                      | University of Sassari                                           | Italy                                                      |
| Brix, Holger         | Senior Researcher                                                            | Institute of Coastal Research, Helmholtz-Zentrum Geesthacht     | Germany                                                    |
| Briz, Victor         | Postdoctoral researcher                                                      | CSIC                                                            | Spain                                                      |
| Broadhurst, Thomas   | Professor of Astrophysics                                                    | Ikerbasque Foundation, The Basque Country                       | Spain                                                      |
| Broadwater, Bo       | Physics                                                                      | Uppsala University                                              | Sweden                                                     |
| Broady, Paul         | Lecturer / researcher retired                                                | University of Canterbury                                        | New Zealand                                                |
| Brochet, Silvia      | PhD student                                                                  | University of Lausanne                                          | Switzerland                                                |
| Brock, Olaf          | Soil Chemistry (PhD)                                                         | University of Amsterdam (IBED)                                  | Netherlands (the)                                          |
| Brocklehurst, Martin | Waste & Resource Management; Environmental Science; Energy & Citizen Science | Independent Environmental Consultant - KempleyGreen Consultants | United Kingdom of Great Britain and Northern Ireland (the) |
| Brodeur, Jacques     | Professor                                                                    | Université de Montréal                                          | Canada                                                     |
| Brodeur, Julie       | Researcher Environmental Toxicology                                          | CONICET                                                         | Argentina                                                  |
| Brodie, Jon          | Environmental science                                                        | James Cook University                                           | Australia                                                  |
| Brodman, Robert      | Biology Professor                                                            | Buena Vista University                                          | United States of America (the)                             |
| Broeg, Katja         | Senior Scientist, Marine biology and Environmental toxicology                | BSH                                                             | Germany                                                    |
| Broekaert, Paul      | Professor                                                                    | ULB                                                             | Belgium                                                    |
| Broennimann, Olivier | Scientific Staff                                                             | University of Lausanne                                          | Switzerland                                                |
| Brogna, Patricia     | Ciencias sociales                                                            | UNAM                                                            | Mexico                                                     |
| Brognez, Helene      | Associate Professor / Physics of Climate                                     | LATMOS / University Paris-Saclay                                | France                                                     |
| Brokaw, Nick         | Professor, forest ecology                                                    | University of Puerto Rico                                       | Puerto Rico                                                |
| Brokaw, Nicholas     | Professor (retired)                                                          | University of Puerto Rico-Rio Piedras                           | Puerto Rico                                                |
| Bromberg, Elke       | Professor and Researcher (Physiology)                                        | Pontifical Catholic University of Rio Grande do Sul             | Brazil                                                     |
| Bromer, William      | Professor of Biology and Environmental Science                               | University of St. Francis                                       | United States of America (the)                             |
| Bronner, Gary        | Academic & Researcher (Mammalogy)                                            | University of Cape Town                                         | South Africa                                               |
| Brooke, Sandra       | Research Faculty III                                                         | Florida State University                                        | United States of America (the)                             |
| Brooker, Stuart      | PhD Student in Ecology                                                       | Durham University                                               | United Kingdom of Great Britain and Northern Ireland (the) |
| Brookes, Lola        | PhD candidate                                                                | Zoological Society of London                                    | United Kingdom of Great Britain and Northern Ireland (the) |
| Brooks, Robert       | Professor Emeritus of Geography and Ecology                                  | Pennsylvania State University                                   | United States of America (the)                             |
| Brooks, Jeremy       | Stream Ecology, PhD Student                                                  | Idaho State University                                          | United States of America (the)                             |
| Brooks, Daniel       | Climate change and emerging diseases specialist                              | University of Nebraska                                          | United States of America (the)                             |
| Brooks, Kevin        | Associate Professor, Psychology                                              | Macquarie University                                            | Australia                                                  |
| BROSSE, Sebastien    | Professor of Ecology                                                         | University Paul Sabatier, Toulouse                              | France                                                     |
| Brost, Mascha        | Research assistant                                                           | DLR                                                             | Germany                                                    |
| Brothers, Denis      | Professor Emeritus, Entomology                                               | University of KwaZulu-Natal                                     | South Africa                                               |
| Brotos, Lluís        | Senior Researcher                                                            | CSIC at InForest JRU (CREAF-CTFC)                               | Spain                                                      |
| Brouat, Carine       | Evolutionary Ecology                                                         | IRD                                                             | France                                                     |
| Brouwer, Stijn       | Senior researcher                                                            | KWR Water Research Institute                                    | Netherlands (the)                                          |
| Browett, William     | 586 Princess Av                                                              | Ph.D., retired chemist                                          | Canada                                                     |

|                            |                                                                |                                                                                 |                                                            |
|----------------------------|----------------------------------------------------------------|---------------------------------------------------------------------------------|------------------------------------------------------------|
| Brown, Shae                | PhD Researcher, School of Environment, Science and Engineering | Southern Cross University                                                       | Australia                                                  |
| Brown, Virginia            | Ecologist                                                      |                                                                                 | United States of America (the)                             |
| Brown, B. Ricardo          | Prof. Social Science and Sociology                             | Pratt institute                                                                 | United States of America (the)                             |
| Brown, Christopher         | CEO                                                            | Namibian Chamber of Environment (representing 65 environmental NGOs in Namibia) | Namibia                                                    |
| Brown, Sally               |                                                                | Bournemouth University                                                          | United Kingdom of Great Britain and Northern Ireland (the) |
| Brown, Gregory             | Oceanographer (retired)                                        | Global marine survey company                                                    | United Kingdom of Great Britain and Northern Ireland (the) |
| Brown, Beverly             | Professor Emerita/Ecology                                      |                                                                                 | United States of America (the)                             |
| Brown, Wendy               | Research Technician                                            | The Rocky Mountain Biological Laboratory                                        | United States of America (the)                             |
| Brown, Katrina             | Senior Researcher                                              | James Hutton Institute                                                          | United Kingdom of Great Britain and Northern Ireland (the) |
| Brown, Derek               | Honorary Senior Lecturer                                       | University of Glasgow                                                           | United Kingdom of Great Britain and Northern Ireland (the) |
| Brown Sevilla, Samantha    | Astronomy                                                      | MPIA                                                                            | Germany                                                    |
| Bruce, Amy                 | PhD Candidate, Molecular & Cell Biology                        | University of Cape Town                                                         | South Africa                                               |
| Bruce, Robyn               | MSc Primate Conservation                                       | Miss                                                                            | United Kingdom of Great Britain and Northern Ireland (the) |
| Brüderlin, Luca            | Intern in Water Remote Sensing                                 | ETH EAWAG                                                                       | Switzerland                                                |
| Bruendl, Aisha             | PhD student                                                    | University of Exeter                                                            | United Kingdom of Great Britain and Northern Ireland (the) |
| Brugger, Bastien           | Research associate, Astrophysics                               | Cornell University                                                              | United States of America (the)                             |
| Brugger, Keith             | Professor, Glaciology and Quaternary Geology                   | University of Minnesota, Morris                                                 | United States of America (the)                             |
| Brugger, Andreas           | Postdoctoral Researcher                                        | University of Innsbruck                                                         | Austria                                                    |
| Brugger, Paula             | Professor                                                      | UFSC                                                                            | Brazil                                                     |
| Brügger, Paula             | Coordinator of the Ecological Justice Observatory              | Federal University of Santa Catarina                                            | Brazil                                                     |
| Brüggmann Dr. med., Ludwig | Clinical director, retreated                                   |                                                                                 | Germany                                                    |
| Brühmann, Boris            | Health Services Research                                       | University Medical Clinic of Freiburg                                           | Germany                                                    |
| Bruins, Jorick             | PhD Chemistry                                                  | Wageningen University and Research                                              | Netherlands (the)                                          |
| Brumm, Henrik              | Behavioural Biology                                            | Max Planck Institute for Ornithology                                            | Germany                                                    |
| Brumsack, Hans             | Prof. Dr. / Microbiogeochemistry                               | ICBM Oldenburg University                                                       | Germany                                                    |
| Brun, Christophe           | Researcher in physics                                          | CNRS and Sorbonne University                                                    | France                                                     |
| BRUN, Frederic             | Environnemental engineer                                       |                                                                                 | France                                                     |
| Brunberg, Anna-Kristina    | Associate Professor, Limnology                                 | Uppsala University                                                              | Sweden                                                     |
| Brunel, Caroline           | Microbial Ecology                                              | Taizhou University                                                              | China                                                      |
| brunet, pascal             | ingeneer hydrology                                             | cnrs                                                                            | France                                                     |
| Brunet, Pere               | Retired Full Professor                                         | UPC, Polytechnical University of Catalonia                                      | Spain                                                      |
| Brunet, Magali             | Research scientist in Materials Science                        | CNRS                                                                            | France                                                     |
| Bruni, Margherita          | Biotechnologist                                                | IEO                                                                             | Italy                                                      |
| Brüniche-Olsen, Anna       | Research Scientist                                             | Purdue University                                                               | United States of America (the)                             |

|                         |                                                                            |                                                            |                                                            |
|-------------------------|----------------------------------------------------------------------------|------------------------------------------------------------|------------------------------------------------------------|
| Brunk, Micha            |                                                                            | Leibniz-Institut für Neurobiologie                         | Germany                                                    |
| Brunner, Michèle        | Teaching leader                                                            | CHUV                                                       | Switzerland                                                |
| Brunner, Beat           | Renewable energy, Climate plans co-author, IPCC SR15 & AR6 expert reviewer | Independent scientist, previously EPFL Lausanne            | Switzerland                                                |
| Bruno, ROMAGNY          | Economist, research director                                               | Institut de Recherche pour le Développement (IRD)          | France                                                     |
| Bruno, Daniel           | Postdoc researcher/Ecology                                                 | Instituto Pirenaico de Ecología (IPE-CSIC)                 | Spain                                                      |
| Bruno, Davide           | Senior Lecturer in Psychology                                              | Liverpool John Moores University                           | United Kingdom of Great Britain and Northern Ireland (the) |
| Brush, Erik             | Zoology PhD Candidate                                                      | University of Hawaii                                       | United States of America (the)                             |
| Bruskotter, Jeremy      | Professor                                                                  | The Ohio State University                                  | United States of America (the)                             |
| Brüwer, Jan David       | PhD Student                                                                | Max Planck Institute for Marine Microbiology               | Germany                                                    |
| Bryan, Brett            | Alfred Deakin Professor of Global Change, Environment, and Society         | Deakin University                                          | Australia                                                  |
| Bryant, Rosemarie       | Anthropology                                                               |                                                            | United Kingdom of Great Britain and Northern Ireland (the) |
| Bryl, Łukasz            | PhD student (reclamation of water reservoirs)                              | Faculty of Chemistry, Adam Mickiewicz University in Poznan | Poland                                                     |
| Bryson-Morrison, Nicola | Primatologist, Researcher Ecology & Conservation                           | University of Kent                                         | United Kingdom of Great Britain and Northern Ireland (the) |
| Buatier, Martine        | Professor in Geology                                                       | Université Bourgogne Franche Comté                         | France                                                     |
| Bubadué, Jamile         | PhD student in Zoology                                                     | Universidade Federal de Santa Maria                        | Brazil                                                     |
| Bucak, Tuba             | Conservation GIS and Modeling Expert, PhD                                  | DKM                                                        | Turkey                                                     |
| Bucci, Enrico           | Adjunct professor in Biology                                               | Temple University                                          | Italy                                                      |
| Buchanan, Mark          | Author and Science Writer                                                  |                                                            | United Kingdom of Great Britain and Northern Ireland (the) |
| Buchanan, Katherine     | Professor in Ecology and Animal Behaviour                                  | Deakin University                                          | Australia                                                  |
| Buchanan, Kate          | Professor                                                                  | Deakin University                                          | Australia                                                  |
| Buchanan, Scott         | Herpetologist                                                              | RIDEM Fish and Wildlife                                    | United States of America (the)                             |
| Buchanan, Peter         | Mycologist; Science Team Leader                                            | Manaaki Whenua - Landcare Research                         | New Zealand                                                |
| Buchanan-Smith, Hannah  | Professor, Psychology                                                      | University of Stirling                                     | United Kingdom of Great Britain and Northern Ireland (the) |
| Buchholz, Lech          | PhD in nature conservation and entomology                                  | Holy Cross National Park                                   | Poland                                                     |
| Buchholz, Saskia        | Urban Climate Research                                                     |                                                            | Germany                                                    |
| Buchmueller, Juri       | PhD student in Data Analysis and Visualization                             | University of Konstanz                                     | Germany                                                    |
| Buck, Julia             | Assistant professor, biology                                               | UNC Wilmington                                             | United States of America (the)                             |
| Buck, Laura             | Postdoctoral Researcher                                                    | University of California Davis                             | United States of America (the)                             |
| Buckland, Philip        | Environmental Archaeologist                                                | Umeå University                                            | Sweden                                                     |
| Buckland, Paul          | Entomologist                                                               |                                                            | United Kingdom of Great Britain and Northern Ireland (the) |
| Buckley, Hannah         | Associate Professor of Ecology                                             | Auckland University of Technology                          | New Zealand                                                |
| Buckley, Heather        | Assistant Professor of Civil Engineering                                   | University of Victoria                                     | Canada                                                     |
| Buckley, James          | Postdoctoral researcher                                                    | ETH Zurich                                                 | Switzerland                                                |

|                                       |                                                                    |                                                                |                                                            |
|---------------------------------------|--------------------------------------------------------------------|----------------------------------------------------------------|------------------------------------------------------------|
| Buckley, Graham                       | Prosthetist                                                        |                                                                | Ireland                                                    |
| Bucksteeg, Michael                    | Head of research group energy markets and energy policy            | University of Duisburg-Essen                                   | Germany                                                    |
| Buckup, Paulo                         | Professor, Zoology                                                 | Universidade Federal do Rio de Janeiro, Museu Nacional         | Brazil                                                     |
| Budd, William                         | Professor Emeritus, School of the Environment, ecological planning | Washington State University                                    | United States of America (the)                             |
| Budde, Katharina                      | Postdoc in forest genetics                                         | INRA - French National Institute for Agricultural Research     | France                                                     |
| Budde, Michael                        | Senior Scientist in Clinical Research                              | Biostatistics F.Hoffmann-La Roche Ltd.                         | Germany                                                    |
| Budzicz, Łukasz                       | adjunct / psychology                                               | University of Zielona Gora                                     | Poland                                                     |
| Bueche, Matthieu                      | Research assistant                                                 | University of Neuchâtel                                        | Switzerland                                                |
| Buenavista, Dave                      | Associate Professor of Conservation Biology                        | Central Mindanao University                                    | Philippines (the)                                          |
| Buendia-Fores, Cristina               | Aquatic Scientist                                                  | AEP                                                            | Spain                                                      |
| Bueno, David                          | Chair in Neuroeducation UB-EDU1ST                                  | University of Barcelona                                        | Spain                                                      |
| Bueno Villafañe, Diego                | Biologist                                                          | Instituto de Investigación Biológica del Paraguay              | Paraguay                                                   |
| Büermann, Andrea                      | Landscape Ecology                                                  | Helmholtz Centre for Environmental Research - UFZ              | Germany                                                    |
| Buettner, Alexander                   | Scientist Quality Control and Analytical Development               | Roche                                                          | Germany                                                    |
| Buettner, Christin                    | PhD Student                                                        | Chemnitz University of Technology                              | Germany                                                    |
| Buff, Xavier                          | Professor of Mathematics                                           | Université Toulouse III - Paul Sabatier                        | France                                                     |
| BUGABANDA, NABINTU                    | Researcher                                                         | the hydrobiology research centre                               | Congo (the Democratic Republic of the)                     |
| Bügelmayer-Blaschek, Marianne         | Senior Scientist (Climatology)                                     | Austrian Institute of Technology                               | Austria                                                    |
| Bugli, Matteo                         | Post-Doc researcher in Astrophysics                                | CEA/DRF/IRFU, Astrophysics department, Paris Saclay University | France                                                     |
| Bugoni, Leandro                       | Professor                                                          | Universidade Federal do Rio Grande - FURG                      | Brazil                                                     |
| Buhle, Eric                           | Ecology                                                            | Biomark / NOAA Fisheries                                       | United States of America (the)                             |
| Buhr, Maïke                           | PhD candidate and lecturer                                         | Leuphana University Lüneburg                                   | Germany                                                    |
| Buhr, Lorina                          | Scientific Researcher                                              | University Medical Center Goettingen                           | Germany                                                    |
| Bührnheim, Cristina                   | Professor                                                          | Universidade do Estado do Amazonas                             | Brazil                                                     |
| Buisson, Elise                        | Assoc. Pr / Ecology                                                | IMBE / Avignon Université                                      | France                                                     |
| Buisson, Laetitia                     | Associate Professor                                                | Université Toulouse 3                                          | France                                                     |
| Buitenhuis, Erik                      | ocean biogeochemistry (including greenhouse gases)                 | University of East Anglia                                      | United Kingdom of Great Britain and Northern Ireland (the) |
| Buitrago Aristizábal, María Alejandra | Botanist                                                           | Unicamp                                                        | Brazil                                                     |
| Bukejs, Andris                        | Dr.                                                                | Daugavpils University                                          | Latvia                                                     |
| Bukoski, Jacob                        | Assistant Professor, Forest Ecosystems and Society                 | Oregon State University                                        | United States of America (the)                             |
| Bulgarella, Mariana                   | Research Fellow                                                    | Victoria University of Wellington                              | New Zealand                                                |
| Bulgarelli, Barbara                   | Senior Scientist                                                   | JRC - EC                                                       | Italy                                                      |
| Bulgheresi, Silvia                    | Assistant Professor Environmental Cell Biology                     | University of Vienna                                           | Austria                                                    |
| Bulkan, Janette                       | Associate Professor of Indigenous Forestry                         | University of British Columbia                                 | Canada                                                     |



|                              |                                                            |                                                                            |                                                            |
|------------------------------|------------------------------------------------------------|----------------------------------------------------------------------------|------------------------------------------------------------|
| Bulla, Martin                | Postdoc in ecology, biorhythms and ornithology             | Max Planck Institute for Ornithology and Czech University of Life Sciences | Germany                                                    |
| Bulmer, M H                  | Director                                                   | Roedown Research R2                                                        | United States of America (the)                             |
| Bultheel, Clément            | Green Finance Officer                                      | Ministry for the Ecological and Inclusive Transition                       | France                                                     |
| Buma, Brian                  | Assistant Professor                                        | University of Colorado, Denver                                             | United States of America (the)                             |
| Bundock, Aaron               | Research Associate, Physics                                | Imperial College London                                                    | United Kingdom of Great Britain and Northern Ireland (the) |
| Büneker, Henrique            |                                                            | Universidade Federal do Rio Grande do Sul                                  | Brazil                                                     |
| Bungard, Michael             | PhD researcher                                             | University of York                                                         | United Kingdom of Great Britain and Northern Ireland (the) |
| Bünger, Mariana              |                                                            | University of Ceará                                                        | Brazil                                                     |
| Bunse, Ralf                  | Biology and Chemistry teacher                              | Roentgen Highschool, Remscheid                                             | Germany                                                    |
| Bunsy, Yogishah              | PhD candidate                                              | University of Mauritius                                                    | Mauritius                                                  |
| Bunter, Kim                  | Phd - Genetics                                             | University of New England                                                  | Australia                                                  |
| buoncristiani, jean francois | Geologist                                                  | University of Burgundy                                                     | France                                                     |
| Buoro, Mathieu               | Research scientist - Ecology Evolution                     | INRA ECOBIOP                                                               | France                                                     |
| Buotte, Polly                | Ecosystem Modeling                                         | University of California, Berkeley                                         | United States of America (the)                             |
| Burch, Hayden                | Medical Student and researcher                             | University of Melbourne                                                    | Australia                                                  |
| Burek, Jasmina               | Assistant Professor, Mechanical and Industrial Engineering | University of Massachusetts Lowell                                         | United States of America (the)                             |
| burel, Françoise             | ecology                                                    | CNRS                                                                       | France                                                     |
| Burella, Pamela              | Phd                                                        | Universidad Nacional del Litoral                                           | Argentina                                                  |
| Burfield, Ian                | Global Science Coordinator (Species)                       | BirdLife International                                                     | United Kingdom of Great Britain and Northern Ireland (the) |
| Bürger, Patrick              | Doctoral researcher in Process Engineering                 | BTU Cottbus-Senftenberg                                                    | Germany                                                    |
| Burgess, George              | Director Emeritus, Florida Program for Shark Research      | University of Florida                                                      | United States of America (the)                             |
| Burghardt, Gordon            | Professor of Ecology & Evolutionary Biology and Psychology | University of Tennessee                                                    | United States of America (the)                             |
| Burgisser, Alain             | Researcher in Geology                                      | CNRS                                                                       | France                                                     |
| Burgo Braga, Ricardo         | Geographer, MSc                                            | INNTI Environmental Consultants                                            | Brazil                                                     |
| BURGUET, MARIA               | ASSOCIATE LECTURER                                         | University of Valencia                                                     | Spain                                                      |
| Burhenne, Luisa              | Climate Change Mitigation and Renewable Energy             | University of British Columbia                                             | Canada                                                     |
| Buria, Leonardo              | Doctor en Biología                                         | Administración de Parques Nacionales                                       | Argentina                                                  |
| Burk, Courtney               | MSC Wildlife Connectivity                                  | University of New Brunswick                                                | Canada                                                     |
| Burke, Michael               | Chemist, Adjunct professor; retired                        | CollegeAmerica                                                             | United States of America (the)                             |
| Burke, Rory                  | PhD Researcher                                             | University College Dublin                                                  | Ireland                                                    |
| Burke, Thomas                | Postdoc, molecular and cell biology                        | University of California, Berkeley                                         | United States of America (the)                             |
| Burkey, Tormod V.            | Visiting Scientist                                         | University of Oslo                                                         | Norway                                                     |
| BURLACU, GEORGE              | DESIGN ENGINEER                                            | GVA LIGHTING INC.                                                          | Canada                                                     |
| Burmeister, Wim              | Professor                                                  | Univ. Grenoble Alpes                                                       | France                                                     |
| Burn, Adam                   | Plant Science                                              | SCU Lismore                                                                | Australia                                                  |
| Burnett, Alexandra           | Behavioral Ecology                                         | University of Arizona                                                      | United States of America (the)                             |

|                      |                                                                             |                                                              |                                                            |
|----------------------|-----------------------------------------------------------------------------|--------------------------------------------------------------|------------------------------------------------------------|
| Burnett, Kelly       | Aquatic Ecologist                                                           |                                                              | United States of America (the)                             |
| Burnham, Robyn       | Associate Curator Emerita, Herbarium                                        | University of Michigan                                       | United States of America (the)                             |
| Burnham, Theresa     | PhD Candidate in Marine Ecology                                             | San Diego State University & University of California, Davis | United States of America (the)                             |
| Burns, David         | Postdoctoral Research Associate                                             | Newcastle University                                         | United Kingdom of Great Britain and Northern Ireland (the) |
| Burnside, Beth       | Professor of Molecular & Cell Biology, Vice Chancellor for Research Emerita | University of California, Berkeley                           | United States of America (the)                             |
| Burquez, Alberto     | Researcher                                                                  | Universidad Nacional Autonoma de Mexico                      | Mexico                                                     |
| Burri, Reto          | Biologist                                                                   |                                                              | Germany                                                    |
| Burslem, Alec        | PhD Student; Marine Physiology                                              | The University of St Andrews                                 | United Kingdom of Great Britain and Northern Ireland (the) |
| BURST, Maxime        | Postdoctoral Researcher - Vegetation Science                                | CNRS                                                         | France                                                     |
| Burt, April          | Marine Science                                                              | Oxford University                                            | United Kingdom of Great Britain and Northern Ireland (the) |
| Burte, Julien        | Researcher                                                                  | CIRAD                                                        | France                                                     |
| Burton, Frederic     | Conservation Biologist                                                      | Cayman Islands Department of Environment                     | Cayman Islands (the)                                       |
| Burton, Alice        | Research Fellow                                                             | University College London                                    | United Kingdom of Great Britain and Northern Ireland (the) |
| Burton, Philip       | Professor                                                                   | University of Northern British Columbia                      | Canada                                                     |
| Burtscher, Leonard   | Astronomer                                                                  | Leiden University                                            | Netherlands (the)                                          |
| Burvingt, Olivier    | Coastal Dynamics Scientist                                                  | University of Plymouth                                       | United Kingdom of Great Britain and Northern Ireland (the) |
| Busack, Stephen      | Emeritus Director, Research and Collections                                 | North Carolina Museum of Natural Sciences                    | United States of America (the)                             |
| Buscardo, Erika      | Ecology                                                                     | University of Brasilia                                       | Brazil                                                     |
| Buschke, Falko       | Senior lecturer in Macroecology and Conservation Biology                    | University of the Free State                                 | South Africa                                               |
| Bush, Mark           | Professor of Biology                                                        | Florida Institute of Technology                              | United States of America (the)                             |
| Bush, Melanie E L    | Associate Professor                                                         | Adelphi University                                           | United States of America (the)                             |
| Busón, Carlos        | Pesquisador post doctoral en desenvolvimiento regional. PPGDRS-CAPES        | Universidade Estadual de Mato Grosso do Sul (UEMS)           | Brazil                                                     |
| Bussi, Claudio       | Postdoc Researcher                                                          | The Francis Crick Institute                                  | United Kingdom of Great Britain and Northern Ireland (the) |
| Bustamante, Mercedes |                                                                             | University of Brasília                                       | Brazil                                                     |
| BUSTAMANTE, Paco     | Professor of Ecotoxicology                                                  | university of La Rochelle                                    | France                                                     |
| Butcher, Sarah       | Professor, Microbiology                                                     | University of Helsinki                                       | Finland                                                    |
| Butler, Phillip      | Senior Engineer, Solar PV development                                       | Oxford PV                                                    | United Kingdom of Great Britain and Northern Ireland (the) |
| Butler, Brett        | Doctoral Student of Evolutionary Biology                                    | Universidad Nacional Autonoma de Mexico                      | Mexico                                                     |
| Butler, Colin        | Honorary Professor; Epidemiology and Public Health                          | Australian National University                               | Australia                                                  |
| Butler, Paul         | Honorary Senior Research Lecturer                                           | University of Exeter                                         | United Kingdom of Great Britain and Northern Ireland (the) |
| Butler, Dr. Reginald | PhD Marine Biology / Ecology                                                | Memorial University of Newfoundland                          | Canada                                                     |

|                             |                                                               |                                                                                        |                                                            |
|-----------------------------|---------------------------------------------------------------|----------------------------------------------------------------------------------------|------------------------------------------------------------|
| Butler, Wayne               | Chief Medical Physicist                                       | Wheeling Hospital, Schiffler Cancer Center                                             | United States of America (the)                             |
| Butler, Christopher         | PhD Geology                                                   | University of Durham, UK. Ex-oil industry.                                             | United Kingdom of Great Britain and Northern Ireland (the) |
| Butt, Nathalie              | Research Fellow                                               | The University of Queensland                                                           | Australia                                                  |
| Buttiglieri, Gianluigi      | Environmental Engineering                                     | ICRA, Catalan Institute for Water Research                                             | Spain                                                      |
| Büttner, Florian            | Researcher                                                    | THN-Institute for Energy and Building (ieg)                                            | Germany                                                    |
| Buttschardt, Tillmann       | Applied Landscape Ecology / Ecological Planning               | University of Münster, Institute of Landscape Ecology                                  | Germany                                                    |
| Bütün, Yagmur               | Doctoral researcher                                           | Georg-August University                                                                | Germany                                                    |
| Butz, Martin                | Professor in Cognitive Modeling, Computer Science, Psychology | Faculty of Science, University of Tuebingen                                            | Germany                                                    |
| Buxons Vives, Núria         | Biotechnologist                                               | VIB Leuven                                                                             | Belgium                                                    |
| Buys, Andre                 | Emeritus professor                                            | University of Pretoria                                                                 | South Africa                                               |
| Bydlowski, Sergio           | Associate Professor, Hematology and Cell Therapy              | University of Sao Paulo School of Medicine                                             | Brazil                                                     |
| Byer, Nathan                | Researcher                                                    | University of Nevada - Reno                                                            | United States of America (the)                             |
| Byers, Jeb                  | Professor                                                     | University of Georgia                                                                  | United States of America (the)                             |
| Byrne, James                | Professor, Climate Science and Solution                       | University of Lethbridge                                                               | Canada                                                     |
| C. Bastias, Cristina        | Postdoctoral researcher                                       | Cordoba University                                                                     | Spain                                                      |
| Caballer Gutierrez, Manuel  | Assistant Professor / Marine biology and biodiversity         | American University of Paris                                                           | France                                                     |
| CABANAC, Remi               | Astronomer                                                    | Universite de Toulouse                                                                 | France                                                     |
| Cabañas-Moreno, José        | Senior Researcher, Nanoscience & Nanotechnology               | CINVESTAV-IPN                                                                          | Mexico                                                     |
| Cabello, Iballa             | Assistant researcher/Professor                                | UTN & CONICET/UNCuyo                                                                   | Argentina                                                  |
| Cabello, Javier             | Professor                                                     | University of Almería                                                                  | Spain                                                      |
| Cabezas, M. Pilar           | PostDoc Researcher                                            | CIBIO-InBIO                                                                            | Portugal                                                   |
| Cabin, Robert               | Professor of Environmental Studies                            | Brevard College                                                                        | United States of America (the)                             |
| Cable, Stuart               | Botanist                                                      | Royal Botanic Gardens Kew                                                              | United Kingdom of Great Britain and Northern Ireland (the) |
| Cabodevilla, Xabier         | PhD student on Ecology and Conservation Biology               | University of Basque Country (EHU) and Institute for Game and Wildlife Research (IREC) | Spain                                                      |
| Cabral, Andressa            | Master's Student                                              | Universidade de São Paulo                                                              | Brazil                                                     |
| Cabral, Madalena            | PhD                                                           | UABCS                                                                                  | Mexico                                                     |
| Cabral de Oliveira, Mariana | Full Professor                                                | University of Sao Paulo                                                                | Brazil                                                     |
| Cabrerizo, Marco J.         |                                                               | University of Vigo                                                                     | Spain                                                      |
| Cabrero, Francisco J.       | Associate Professor                                           | Complutense University of Madrid                                                       | Spain                                                      |
| Cabrit, Sylvie              | Astrophysicist                                                | Observatoire de Paris                                                                  | France                                                     |
| Caccianiga, Marco           | Professor of Botany                                           | Università degli Studi di Milano                                                       | Italy                                                      |
| Caceres, Hernan             | PhD in Conservation Science                                   |                                                                                        | Chile                                                      |
| CACERES, BOLIVAR            | RESEARCHER-GLACIOLOGY                                         | INAMHI                                                                                 | Ecuador                                                    |
| Cachera, Marie              | Numerical Ecology                                             | Shom                                                                                   | France                                                     |
| Cadeddu, Chiara             | Associate Professor of Planetary Health                       | Erasmus School of Health Policy and Management                                         | Netherlands (the)                                          |
| Cadena-Roa, Jorge           | Researcher/ Sociology                                         | CEIICH-UNAM                                                                            | Mexico                                                     |
| Cadez, Luca                 | Research fellow                                               | Università degli Studi di Udine                                                        | Italy                                                      |

|                              |                                                      |                                                                 |                                                            |
|------------------------------|------------------------------------------------------|-----------------------------------------------------------------|------------------------------------------------------------|
| Cadima, Esperança            | Neurosciences                                        | ISCTE-IUL                                                       | Portugal                                                   |
| Cadotte, Marc                | Professor                                            | University of Toronto                                           | Canada                                                     |
| Cadoux, Anita                | geologist                                            | Université Paris-Sud 11                                         | France                                                     |
| Caduff, Lea                  | Aquatic research                                     | Eawag                                                           | Switzerland                                                |
| Cadwell, Larry               | Ecologist                                            | Pacific Northwest National Laboratory (retired)                 | United States of America (the)                             |
| Cafaro, Philip               |                                                      | Colorado State University                                       | United States of America (the)                             |
| CAHALAN, ROBERT              | Emeritus Scientist, Climate and Radiation Laboratory | NASA Goddard Space Flight Ctr                                   | United States of America (the)                             |
| Caicedo, Pilar               | PhD Student                                          | University of Western Ontario                                   | Colombia                                                   |
| Cailliet, Gregor             | Professor Emeritus                                   | Moss Landing Marine Laboratories                                | United States of America (the)                             |
| Cairns, Kylie                | Research Fellow                                      | Centre for Ecosystem Science, UNSW                              | Australia                                                  |
| Cairns, Michael              | Research Ecologist                                   |                                                                 | United States of America (the)                             |
| Calatayud, Natalie           | Scientist Reproductive Biologist and conservationist | Conservation Science Network                                    | Australia                                                  |
| Calbi, Mariasole             | PhD student in Forest Ecology                        | Freie Universitaet Berlin                                       | Germany                                                    |
| Calbó, Josep                 | Professor, Physics                                   | Universitat de Girona                                           | Spain                                                      |
| Calcano, Eliecer             | Biography, mammals, ENM                              | Universidade Federal de Santa Maria                             | Venezuela (Bolivarian Republic of)                         |
| Calderon, Jennifer           | master degree student                                | Universidad Nacional de Colombia                                | Colombia                                                   |
| Calderon, Martha             | Professor                                            | Universidad Nacional de Colombia                                | Colombia                                                   |
| Calderon, Ana Patricia       | PhD, Conservation Biology                            | Leibniz Institute for Zoo and Wildlife Research                 | Germany                                                    |
| Calderon-Aguilera, Luis E.   | Professor, Marine Ecology                            | Center for Scientific Research and Graduate Studies of Ensenada | Mexico                                                     |
| Calhau, Júlia                | Postdoc researcher                                   | Universidade Federal do Espírito Santo                          | Brazil                                                     |
| Calì, Corrado                | Research Scientist, Neuroscience                     | KAUST                                                           | Saudi Arabia                                               |
| Caliari Oliveira, Ricardo    | Postdoctoral Fellow - Evolutionary Biology           | KU Leuven                                                       | Belgium                                                    |
| Caliman, Adriano             | Associate Professor in Ecology                       | Universidade Federal do Rio Grande do Norte                     | Brazil                                                     |
| Calisse, Paolo Gherardo      | Site Manager of the Cherenkov Telescope Array North  | CTAO gGmbH                                                      | Germany                                                    |
| Callaway, Ruth               | Senior Research Scientist Marine Ecosystems          | Swansea University                                              | United Kingdom of Great Britain and Northern Ireland (the) |
| Callejas-Díaz, Marta         | PhD Student- Forest Ecology and Genetics             | Forest Research Centre, INIA                                    | Spain                                                      |
| Callen, Roger                | Geologist/Social Anthropologist retired.             | Volunteer at Queensland State Herbarium, Mt Coot-tha.           | Australia                                                  |
| Calliari Cuadro, Danilo Luis | Adjunt Professor - Biological Oceanography           | Universidad de la República - Faculty of Sciences               | Uruguay                                                    |
| Callicott, Baird             | Regents Professor of Philosophy Emeritus             | University of North Texas                                       | United States of America (the)                             |
| Callister-Hakewill, Zoe      | Cognitive Science Research Officer                   | Macquarie University                                            | Australia                                                  |
| Callway, Dr. Rosalie         | Sustainable urban ecology                            | Consultant & Partnership for Biodiversity in Planning           | United Kingdom of Great Britain and Northern Ireland (the) |
| Calmé, Sophie                | Professor, Tropical Ecology and Conservation         | Université de Sherbrooke                                        | Canada                                                     |
| Calvache, Diana              | Marine Biologist                                     | University of Ghent                                             | Ecuador                                                    |
| Calvani, Sandro              | Senior Adviser                                       | Mae Fah Luang Foundation (under Royal Patronage)                | Thailand                                                   |
| Calvert, Jed                 | PhD student, fungal ecology                          | University of Queensland                                        | Australia                                                  |
| Calvet, Jean-Christophe      | Researcher                                           | CNRM (Université de Toulouse, Meteo-France, CNRS)               | France                                                     |
| Calvin, William              | prof emeritus                                        | University of Washington                                        | United States of America (the)                             |

|                           |                                                         |                                                                                                                     |                                                            |
|---------------------------|---------------------------------------------------------|---------------------------------------------------------------------------------------------------------------------|------------------------------------------------------------|
| Calvo Carrasco, Daniel    | Veterinary medicine                                     | Wildfowl & Wetlands Trust (WWT)                                                                                     | United Kingdom of Great Britain and Northern Ireland (the) |
| Camacho, Carlos           | Postdoctoral researcher in Evolutionary Ecology         | Lund University                                                                                                     | Sweden                                                     |
| Camacho, Miguel           | postdoctoral researcher conservation genetics           | CiBIO                                                                                                               | Portugal                                                   |
| Camacho, Antonio          | Full Professor on Ecology                               | University of Valencia                                                                                              | Spain                                                      |
| Camacho de Coca, Fernando | CEO Earth Observation Laboratory / biosphere from space | EOLAB                                                                                                               | Spain                                                      |
| Camakaris, Helen          | Honorary Fellow in the School of Biosciences            | University of Melbourne                                                                                             | Australia                                                  |
| Camara Assis, Julia       | PhD candidate in Biodiversity                           | UNESP Rio Claro                                                                                                     | Brazil                                                     |
| Cámara de Landa, Enrique  | Full professor (catedrático)                            | Universidad de Valladolid                                                                                           | Spain                                                      |
| Camarda, Martina          | Electronic Engineering                                  |                                                                                                                     | Italy                                                      |
| Camargo, Arley            | University professor                                    | Universidad de la República                                                                                         | Uruguay                                                    |
| Camargo, Nicholas         | Post-doc position in the department of ecology          | University of Brasilia                                                                                              | Brazil                                                     |
| Camarretta, Nicolo        | PhD candidate / Remote sensing in restoration ecology   | University of Tasmania                                                                                              | Australia                                                  |
| Camerlink, Irene          | Associate professor in Animal Sciences                  | Polish Academy of Sciences                                                                                          | Poland                                                     |
| Cameron, Elissa           | Professor                                               | University of Canterbury                                                                                            | New Zealand                                                |
| Cameron, Robert           | Professor of Surgery                                    | David Geffen School of Medicine at UCLA                                                                             | United States of America (the)                             |
| Caminata, Alessio         | Researcher                                              |                                                                                                                     | Italy                                                      |
| CAMINO, MICAELA           | Dr Biology - Conservation Ecology                       | Proyecto Quimilero                                                                                                  | Argentina                                                  |
| Camp, Amber               | PhD student                                             | University of Hawaii at Manoa                                                                                       | United States of America (the)                             |
| CAMPA, Claudine           | Plant Cell Physiologist                                 | IRD                                                                                                                 | France                                                     |
| Campana, Steven           |                                                         | University of Iceland                                                                                               | Iceland                                                    |
| Campana, Julie            | Graduate with master's degree in Ecology and Evolution  | University of Toulouse                                                                                              | France                                                     |
| Campbell, A. Malcolm      | Professor of Biology                                    | Davidson College                                                                                                    | United States of America (the)                             |
| Campbell, Lani            | Research Officer                                        | Children's Hospital Westmead                                                                                        | Australia                                                  |
| Campbell, Bruce           | Director                                                | CGIAR Research Program on Climate Change, Agriculture and Food Security                                             | Denmark                                                    |
| Campbell, David           | Associate Professor, Environmental Sciences             | University of Waikato                                                                                               | New Zealand                                                |
| Campbell, David           | Professional Geoscientist                               | MarineBio Conservation Society                                                                                      | United States of America (the)                             |
| Campbell, W. Bruce        | Research Ecologist                                      |                                                                                                                     | United States of America (the)                             |
| Campeau, Stephane         | Professor                                               | Universite du Quebec a Trois-Rivieres                                                                               | Canada                                                     |
| Campenni, Marco           | Research Fellow                                         | University of Exeter                                                                                                | United Kingdom of Great Britain and Northern Ireland (the) |
| Camphuijsen, Marjolein    | PhD researcher in Sociology                             | Autonomous University of Barcelona                                                                                  | Spain                                                      |
| Camphuysen, C.J.          | Senior scientist                                        | Royal Netherlands Institute for Sea Research                                                                        | Netherlands (the)                                          |
| Campillo i López, Ferran  | Pediatrician                                            | Garrotxa Pediatric Environmental Health Specialty Unit (PEHSU Garrotxa) - Hospital d'Olot i Comarcal de la Garrotxa | Spain                                                      |
| Campioli, Matteo          | Professor Plant Ecology                                 | University of Antwerp                                                                                               | Belgium                                                    |
| Campo, Julio              | Professor                                               | Universidad Nacional Autónoma de México                                                                             | Mexico                                                     |
| Campo Garcia, Juliana     | PhD Student                                             | Charité Universitätsmedizin Berlin                                                                                  | Germany                                                    |

|                              |                                                                            |                                                                                                                        |                                                               |
|------------------------------|----------------------------------------------------------------------------|------------------------------------------------------------------------------------------------------------------------|---------------------------------------------------------------|
| Campos, Isabel               | Researcher                                                                 | University of Aveiro                                                                                                   | Portugal                                                      |
| Campos, Edmo                 | Professor of Physical Oceanography                                         | University of Sao Paulo                                                                                                | Brazil                                                        |
| Campos, João Carlos          | Postdoctoral researcher                                                    | Centre for Research in Geospace Science (CICGE),<br>University of Porto                                                | Portugal                                                      |
| Campos Arce, José Joaquín    | Forestry                                                                   | Sustainable Agriculture Network SAN                                                                                    | Costa Rica                                                    |
| Camprubí, Antoni             | Senior researcher / Geology                                                | Universidad Nacional Autónoma de México                                                                                | Mexico                                                        |
| Camsund, Daniel              | Post-doctoral researcher                                                   | Uppsala university                                                                                                     | Sweden                                                        |
| Canal, David                 | Researchers/Evolutionary Ecology                                           | National Museum of Natural Sciences (MNCN-CSIC)                                                                        | Spain                                                         |
| Canales, Valeria             | Customer Service                                                           | Dominoes                                                                                                               | United States of America (the)                                |
| Canales-Aguirre, Cristian B. | Associate Professor                                                        | Centro i mar, Universidad de Los Lagos                                                                                 | Chile                                                         |
| Canals, Rosa M               | University Professor- Fire ecology-Landscape ecology                       | Universidad Pública de Navarra                                                                                         | Spain                                                         |
| Canário, João                | Researcher/Professor                                                       | Instituto Superior Técnico - University of Lisbon                                                                      | Portugal                                                      |
| Cancela da Fonseca, Luís     | Retired Professor/Researcher at MARE                                       | Algarve University/MARE - Guia Marine Laboratory<br>(FCUL)                                                             | Portugal                                                      |
| Candemir, Yücel              | Emeritus Professor of Economics                                            | Istanbul Technical University                                                                                          | Turkey                                                        |
| Candler, Wilfred             | Agricultural Economics, Ph.D., D.SC.                                       | Retired                                                                                                                | New Zealand                                                   |
| CANEDO, Clarissa             | Professor, Zoology                                                         | Universidade do Estado do Rio de Janeiro (UERJ)                                                                        | Brazil                                                        |
| Canepari, Marco              | Researcher-Neuroscience                                                    | LIPhy, CNRS UMR 5588                                                                                                   | France                                                        |
| Canese, Simonepietro         | Senior Techonologist                                                       | Stazione Zoologica Anton Dohrn                                                                                         | Italy                                                         |
| Canessa, Rafaella            | PhD student, Plant ecology                                                 | University of Marburg                                                                                                  | Germany                                                       |
| Caniglia, Guido              | Scientific Director                                                        | Konrad Lorenz Insitute for Evolution and Cognition<br>Research                                                         | Austria                                                       |
| Canle, Moisés                | Prof. of Physical Chemistry                                                | University of A Coruña                                                                                                 | Spain                                                         |
| Cannelli, Selene             | Master student in marine viromics and their impact on<br>ocean enviroments | University of Queensland                                                                                               | Australia                                                     |
| Cannizzaro, Leonardo         | Researcher                                                                 | National Research Council - Institute of Marine<br>Biological Resources and Biotechnologies Mazara<br>del Vallo branch | Italy                                                         |
| Cano-Barbacil, Carlos        |                                                                            | University of Girona                                                                                                   | Spain                                                         |
| Canovas, Miguel              | Ecology Environmental Management                                           |                                                                                                                        | United Kingdom of Great Britain<br>and Northern Ireland (the) |
| Cansler, C Alina             | Research Ecologist                                                         | University of Washington                                                                                               | United States of America (the)                                |
| Cantarello, Elena            | Lecturer                                                                   | Bournemouth University                                                                                                 | United Kingdom of Great Britain<br>and Northern Ireland (the) |
| Cantuária, Maryele           | Teacher                                                                    | Instituto de Educação, Ciência e Tecnologia do Amapá                                                                   | Brazil                                                        |
| Cantuária, Patrick           | Researcher                                                                 | Instituto de Pesquisas Científicas e Tecnológicas do<br>Estado do Amapá                                                | Brazil                                                        |
| Canzler, Sebastian           | Postdoc in Bioinformatics                                                  | Helmholtz-Centre for Environmental Research - UFZ                                                                      | Germany                                                       |
| Capa, Maria                  | Ramon y Cajal fellow, Marine Biologist                                     | University of the Balearic Islands                                                                                     | Spain                                                         |
| Capan, Cigdem                | Clinical Assistant Professor of Physics                                    | Washington State University                                                                                            | United States of America (the)                                |
| Cape, Mattias                | Oceanographer                                                              | University of Washington                                                                                               | United States of America (the)                                |

|                                      |                                                                             |                                                                                     |                                                            |
|--------------------------------------|-----------------------------------------------------------------------------|-------------------------------------------------------------------------------------|------------------------------------------------------------|
| Capellán-Pérez, Iñigo                | Researcher. Group of Energy, Economy and System Dynamics                    | University of Valladolid                                                            | Spain                                                      |
| Capellesso, Elivane                  | Doutoranda em Ecologia                                                      | UFPR                                                                                | Brazil                                                     |
| Capelli, Mathilde                    | Scientific researcher in agronomy and environment                           | INRA France                                                                         | France                                                     |
| Capello, Marco                       | Researcher in Physical oceanography                                         | DISTAV - University of Genoa                                                        | Italy                                                      |
| Capelo, Jorge                        | Senior Researcher / Vegetation Science                                      | National Institute of Agrarian and Veterinarian Research                            | Portugal                                                   |
| Capers, Robert                       | Botanist. retired                                                           | University of Connecticut                                                           | United States of America (the)                             |
| Capet, Xavier                        | Oceanography                                                                | LOCEAN, IPSL                                                                        | France                                                     |
| Capinha, Cesar                       | Research Fellow in Biogeography & Invasion Ecology                          | Centre for Geographical Studies of the University of Lisbon                         | Portugal                                                   |
| Capinha, César                       | Assistant Professor                                                         | University of Lisbon                                                                | Portugal                                                   |
| Capo, Eric                           | PhD, Post-doctoral Researcher in Aquatic Ecology                            | Umeå University                                                                     | Sweden                                                     |
| Capparella, Angelo                   | Emeritus Professor of Zoology                                               | Illinois State University                                                           | United States of America (the)                             |
| Capparelli, Mariana                  | Scientist                                                                   |                                                                                     | Ecuador                                                    |
| Capretz Batista da Silva, João Paulo | Professor                                                                   | UFPB                                                                                | Brazil                                                     |
| Capucho, Ana Teresa                  | Biologist                                                                   |                                                                                     | Portugal                                                   |
| Caracciolo, Romane                   | Phd student in Environmental Chemistry                                      | Institut des Géosciences de l'Environnement (IGE)                                   | France                                                     |
| Carafa, Roberta                      | post doc researcher                                                         | University Rovira y Virgili                                                         | Spain                                                      |
| Čaraitė, Ieva                        | Graduate Student                                                            | Ghent University                                                                    | Lithuania                                                  |
| Caravaggi, Anthony                   | Lecturer in Conservation Biology                                            | University of South Wales                                                           | United Kingdom of Great Britain and Northern Ireland (the) |
| Carbajal, Juan Pablo                 | Researcher, Applied Physics                                                 | University of Applied Sciences Rapperswil                                           | Switzerland                                                |
| Carbajo Martinez, Manuel             | Bioinformatician                                                            | European Bioinformatics Institute                                                   | United Kingdom of Great Britain and Northern Ireland (the) |
| Carballo, José Luis                  | Head of Marine Biology Station (east Pacific); benthic ecology and taxonomy | Instituto de Ciencias del Mar y Limnología, Universidad Nacional Autónoma de México | Mexico                                                     |
| Carballo-Bolaños, Rodrigo            | PhD student                                                                 | Biodiversity Research Center, Academia Sinica                                       | Taiwan                                                     |
| Carbillet, Jeffrey                   | PhD student in ecology                                                      | CEFS, Université de Toulouse, INRA, Castanet Tolosan, 31326                         | France                                                     |
| Carden, Kristin                      | Oceans Program Scientist                                                    | Center for Biological Diversity                                                     | United States of America (the)                             |
| Cardenas, Paco                       | Associate Professor                                                         | Uppsala University                                                                  | Sweden                                                     |
| Cardiel Sanz, José María             | PhD Profesor of Botany                                                      | Universidad Autónoma de Madrid                                                      | Spain                                                      |
| Cardigos, Frederico                  | Former Resarch Assistant                                                    | Okeanos, Horta, Açores, Portugal                                                    | Portugal                                                   |
| Cardilini, Adam                      | Lecturer, Environmental Science                                             | Deakin University                                                                   | Australia                                                  |
| Cardinael, Rémi                      | Dr in soil science and agronomy                                             | CIRAD                                                                               | France                                                     |
| Cardinal, Damien                     | Professor in marine chemistry and biogeochemistry                           | LOCEAN-IPSL, Sorbonne University                                                    | France                                                     |
| Cardinal, Claire                     | PhD student - Primatology                                                   | Oxford Brookes University                                                           | United Kingdom of Great Britain and Northern Ireland (the) |
| cardini, andrea                      | researcher/biology                                                          | university of modena                                                                | Italy                                                      |
| Cardini, Ulisse                      | Research Scientist                                                          | Stazione Zoologica Anton Dohrn                                                      | Italy                                                      |

|                               |                                                             |                                                                    |                                                            |
|-------------------------------|-------------------------------------------------------------|--------------------------------------------------------------------|------------------------------------------------------------|
| Cardona, Albert               | Professor of Neuroscience                                   | University of Cambridge                                            | United Kingdom of Great Britain and Northern Ireland (the) |
| Cardone, Paolo                | Master of Science, Cognitive Neuroscience                   |                                                                    | Italy                                                      |
| Cardoso, Pedro                | Curator                                                     | Finnish Museum of Natural History, University of Helsinki          | Finland                                                    |
| Cardoso, Margarida            | Researcher                                                  | Universidade de Coimbra                                            | Portugal                                                   |
| Cardoso, Jean-Francois        | Astrophysics                                                | Institut d'Astrophysique de Paris                                  | France                                                     |
| Cardoso Pereira, Cássio       | Ph.D. student in Ecology                                    | Universidade Federal de Minas Gerais                               | Brazil                                                     |
| Carducci, Michele             | Full professor Comparative Constitutional Law & Climate Law | CADEAUM University of Salento - Lecce                              | Italy                                                      |
| Carey, Donna                  | Pharmacology                                                | Merck Serono                                                       | Australia                                                  |
| Carey, Mark                   | Ecologist                                                   | University of South Australia                                      | Australia                                                  |
| Carey, James                  | Distinguished Professor of Entomology                       | University of California, Davis                                    | United States of America (the)                             |
| Carignano Torres, Patricia    | Postdoctoral                                                | University of São Paulo                                            | Brazil                                                     |
| Carim, Sean                   | Microbiology                                                | University of California, Berkeley                                 | United States of America (the)                             |
| CARIM, MARCELO DE JESUS       | Environmental Analyst / Scientist                           | Institute of Scientific and Technological Research of Amapá - IEPA | Brazil                                                     |
| Cariñanos, Paloma             | Botanist                                                    | University of Granada,                                             | Spain                                                      |
| Carleson, Nicholas            | PhD Student, Plant Pathology                                | Oregon State University                                            | United States of America (the)                             |
| Carlesso, Lea                 | Soil ecologist                                              |                                                                    | France                                                     |
| Carley, Lauren                | PhD Candidate                                               | Duke University                                                    | United States of America (the)                             |
| Carlile, Nicholas             | Principal Scientist, Conservation Science                   | Office of Environment                                              | Australia                                                  |
| Carlisle, Alison              | Scientist                                                   | University of Queensland                                           | Australia                                                  |
| Carlisle, Liz                 | Assistant Professor, Environmental Studies                  | University of California, Santa Barbara                            | United States of America (the)                             |
| Carlos-Pinedo, Sandra         | PhD Candidate, Environmental Engineering                    | University of Gävle                                                | Sweden                                                     |
| Carlson, Bruce                | Professor Emeritus                                          | University of Michigan                                             | United States of America (the)                             |
| Carlson, Bruce                | Associate Professor of Biology                              | Dr.                                                                | United States of America (the)                             |
| Carlsson, Dan                 | Associate Professor Human Geography                         | Arendus ltd                                                        | Sweden                                                     |
| Carlsson, Jens                | Associate Professor Conservation Genetics                   | University College Dublin                                          | Ireland                                                    |
| Carlsson, Pernilla            | Researcher, environmental/analytical chemistry              | Norwegian Institute for Water Research                             | Norway                                                     |
| Carmen, Esther                | Interdisciplinary environmental social scientist            | University of York                                                 | United Kingdom of Great Britain and Northern Ireland (the) |
| Carmignotto, Ana Paula        | PhD in Zoology, Discipline of Vertebrate Evolution          | Universidade Federal de São Carlos,Campus Sorocaba                 | Brazil                                                     |
| Carmona Higueta, Maria Judith | B. Sc. Biology                                              | University of Antioquia                                            | Colombia                                                   |
| Carnall, Mark                 | Zoologist                                                   | Oxford University                                                  | United Kingdom of Great Britain and Northern Ireland (the) |
| Carneiro da Cunha, Manuela    | Professor emerita/ Anthropology                             | University of Chicago                                              | United States of America (the)                             |
| Carney Almroth, Bethanie      | Assoc Prof ecotoxicology and environmental science          | University of Gothenburg                                           | Sweden                                                     |
| Carnicer, Jofre               | Professor of Ecology                                        | University of Barcelona                                            | Spain                                                      |
| caro, gael                    | Lecturer                                                    | university of Lorraine                                             | France                                                     |
| Carolli, Mauro                | River science, research assistant                           | Leibniz institute for freshwater ecology and inland fishery        | Germany                                                    |



|                            |                                                                |                                                                     |                                |
|----------------------------|----------------------------------------------------------------|---------------------------------------------------------------------|--------------------------------|
| Carollo, Angela            | PhD Student in Statistical Demography                          | MPIDR                                                               | Germany                        |
| Caron, Maria Mercedes      | Researcher                                                     | CONICET                                                             | Argentina                      |
| CARON, Thibault            | PhD student / Biology                                          | Université Paris-Sud                                                | France                         |
| CAROZZI, MARCO             | Post Doc                                                       | INRAE EcoSys                                                        | France                         |
| CARPANETO, Giuseppe Maria  | Professor of Animal Diversity                                  | Roma Tre University, Department of Science                          | Italy                          |
| Carpenter, Brian           | Honorary Professor, Computer Science                           | The University of Auckland                                          | New Zealand                    |
| Carpenter-Kling, Tegan     | PhD candidate                                                  | Nelson Mandela University                                           | South Africa                   |
| Carpentier, Alexandre      | Assistant professor / Marine ecologist                         | University of Rennes 1                                              | France                         |
| Carpin, Sabine             | Assistant Professor in Plant Molecular Biology                 | University of Orléans                                               | France                         |
| Carqueville, Nils          | Professor, Mathematical Physics                                | University of Vienna                                                | Austria                        |
| Carr, Dick                 | Conservation biologist                                         | The Eden to Addo Corridor Initiative                                | South Africa                   |
| Carr, Mignon               | MSc Zoology                                                    | Nelson Mandela University                                           | South Africa                   |
| Carrasco, Mar              | Veterinarian                                                   | Reneco Wildlife Consultants                                         | Morocco                        |
| Carrasco Gómez, Martín     | PhD student in Biomedical Engineering                          | Technical University of Madrid                                      | Spain                          |
| Carrasco-Barea, Lorena     | PhD student                                                    | University of Girona                                                | Spain                          |
| carrasco-Valenzuela, Tomas | PhD. student                                                   | Leibniz-Institut für Zoo- und Wildtierforschung                     | Chile                          |
| Carrascosa, José M.        | Professor of Biochemistry and Molecular Biology                | Universidad Autónoma de Madrid                                      | Spain                          |
| CARREIRA, JOSE A.          | UNIVERSITY PROFESSOR / ECOLOGY                                 | UNIVERSITY OF JAÉN                                                  | Spain                          |
| Carreiro, Ana Rita         | PhD student in Ecology                                         | MARE-UC, University of Coimbra                                      | Portugal                       |
| Carreiro-Silva, Marina     | Researcher                                                     | OKEANOS center, University of the Azores                            | Portugal                       |
| Carrere, Helene            | Associate professor, Physics                                   | Université de Toulouse                                              | France                         |
| Carretero, Miguel A.       | Principal Researcher                                           | CIBIO-InBIO, University of Porto                                    | Portugal                       |
| Carretero Pinzon, Xyomara  | Landscape ecologist                                            | Zocay project                                                       | Colombia                       |
| Carrico, Christian         | Environmental Engineering                                      | New Mexico Institute of Mining and Technology                       | United States of America (the) |
| Carricondo Sánchez, David  | Assistant proffesor in ecology                                 | Inland Norway University                                            | Norway                         |
| Carrié, Romain             | Researcher                                                     | Lund University                                                     | Sweden                         |
| Carrillo, Yolima           | Senior Lecturer in Biogeochemistry                             | Western Sydney University, Hawkesbury Institute for the Environment | Australia                      |
| Carrillo, Presentacion     | Full Professor of Ecology                                      | Universidad de Granada                                              | Spain                          |
| Carrillo, Francisco Javier | President                                                      | World Capital Institute                                             | Mexico                         |
| Carrillo, Francisco        | Post-doc, Innovation and Sustainabilty Researcher              | Orkestra - Basque Institute of Competitiveness                      | Spain                          |
| Carrillo-Rojas, Galo       | Professor / Atmosphere-Surface Processes in the Highland Andes | University of Cuenca                                                | Ecuador                        |
| Carrillo-Tripp, Mauricio   | Principal Investigator, Molecular Biophysics                   | CINVESTAV                                                           | Mexico                         |
| Carroll, Ron               | Emeritus Professor of Ecology                                  | Odum School of Ecology, Univ Georgia                                | United States of America (the) |
| Carrosio, Giovanni         | Environmental sociologist                                      | University of Trieste                                               | Italy                          |
| Carruth, Laura             | Associate Professor, Neuroscience Institute                    | Georgia State University                                            | United States of America (the) |
| Carson, Bobb               | Professor Emeritus/Earth & Environmental Sciences              | Lehigh University                                                   | United States of America (the) |
| Carstens, Kai              | Scientist, electrical engineer                                 |                                                                     | Germany                        |
| Carstens, Herman           | Engineering Statistics                                         | Invoke Analytics                                                    | South Africa                   |
| Carstensen, Jacob          | Professor, Marine Ecology                                      | Aarhus University, Dept. of Bioscience                              | Denmark                        |

|                                        |                                                                   |                                                                   |                                                            |
|----------------------------------------|-------------------------------------------------------------------|-------------------------------------------------------------------|------------------------------------------------------------|
| Carter, Sarah                          | Researcher                                                        | Wageningen University                                             | Netherlands (the)                                          |
| Carter, Dee                            | Professor of Microbiology                                         | University of Sydney                                              | Australia                                                  |
| Carter, Peter                          | Climate policy director                                           | Climate Emergency Institute                                       | Canada                                                     |
| Carter, Joy                            | Vice Chancellor and Professor of Environmental Science            | University of Winchester                                          | United Kingdom of Great Britain and Northern Ireland (the) |
| Carter, Kerryyn                        | Wildlife Biologist                                                | Elephant Connection (NGO)                                         | Zambia                                                     |
| CARTERET, Marion                       | researcher environmental chemistry                                | Savoie Mont Blanc University                                      | France                                                     |
| Carturan, Bruno                        | PhD student in Ecology                                            | UBCO                                                              | Canada                                                     |
| Cartwright, Samantha                   | Senior Biodiversity & Planning Officer / PhD conservation biology | The Wildlife Trusts                                               | United Kingdom of Great Britain and Northern Ireland (the) |
| Carvajal-Quintero, Juan                | PhD Student                                                       | INECOL                                                            | Mexico                                                     |
| Carvalho, João                         | Postdoctoral researcher                                           | University of Aveiro                                              | Portugal                                                   |
| Carvalho, Gervásio                     | Professor                                                         | Pontificia Universidade Católica do Rio Grande do Sul (PUCRS)     | Brazil                                                     |
| Carvalho, Sara                         | Researcher on Environmental Education                             | University of Aveiro                                              | Portugal                                                   |
| Carvalho, Rafael                       | PhD Student                                                       | Centre for Functional Ecology                                     | Portugal                                                   |
| Carvalho, Fernando R.                  | Professor and Researcher                                          | Universidade Federal de Mato Grosso do Sul, câmpus de Três Lagoas | Brazil                                                     |
| Carvalho, David                        | Researcher                                                        | Aveiro University                                                 | Portugal                                                   |
| Carvalho Jr, Elildo                    | Reseracher                                                        | Instituto Chico Mendes de Conservação da Biodiversidade           | Brazil                                                     |
| Carvalho Melo dos Santos, Tamily       | Geographer/Conservation                                           | Instituto de Desenvolvimento Sustentável Mamirauá                 | Brazil                                                     |
| CARVALHO SOBRINHO, JEFFERSON GUEDES DE | Full professor                                                    | UNIVASF                                                           | Brazil                                                     |
| Carvalho, Gastón O.                    | Associate Professor/Evolutionary Ecology                          | Pontificia Universidad Católica de Valparaíso                     | Chile                                                      |
| Casadei, Cecilia                       | Postdoctoral researcher / Structural biology and data science.    | ETH                                                               | Switzerland                                                |
| Casadevall, Margarida                  | University professor                                              | Universitat de Girona                                             | Spain                                                      |
| Casagrande, Elvira                     | Phd Student - Ecology                                             | CONICET                                                           | Argentina                                                  |
| Casagrande, Stefania                   | Scientific Researcher                                             | Max Planck Institute                                              | Germany                                                    |
| Casagrandi, Renato                     | Professor of Ecology                                              | Politecnico di Milano                                             | Italy                                                      |
| Casals, Frederic                       | Lecturer /Wildlife, Fish & Game Management                        | Dept. of Animal Science - University of Lleida                    | Spain                                                      |
| Casamatta, Dale                        | Professor of Biology                                              | University of North Florida                                       | United States of America (the)                             |
| Casamayor, Emilio O                    | Research Professor - Spanish Research Council                     | CEAB-CSIC                                                         | Spain                                                      |
| Casanella, Ramon                       | Associate Professor Electronic Engineering                        | Universitat Politècnica de Catalunya                              | Spain                                                      |
| Casano, Leonardo                       | Full Professor of Plant Physiology                                | University of Alcalá                                              | Spain                                                      |
| Casares, María Victoria                | Biology                                                           | Universidad del Salvador                                          | Argentina                                                  |
| Casares, Fernanda                      | Postdoctoral researcher                                           | Universidade do Estado do Rio de Janeiro                          | Brazil                                                     |
| Casas, Santiago                        | Postdoctoral Researcher in Cosmology and Astrophysics             | Commissariat à l'énergie atomique et aux énergies alternatives    | France                                                     |
| Casas-Ruiz, Joan Pere                  | Postdoctoral Researcher                                           | Université du Québec à Montréal                                   | Canada                                                     |
| Caselli, Christini                     | Postdoc                                                           | Universidade Federal Rural de Pernambuco                          | Brazil                                                     |

|                                |                                                                                          |                                                                          |                                                            |
|--------------------------------|------------------------------------------------------------------------------------------|--------------------------------------------------------------------------|------------------------------------------------------------|
| Casey, Christine               | Entomology                                                                               | University of California, Davis                                          | United States of America (the)                             |
| Casotti, Giovanni              | Professor of Biology                                                                     | West Chester University                                                  | United States of America (the)                             |
| Casper, Gary                   | Wildlife Biologist                                                                       | University of Wisconsin-Milwaukee                                        | United States of America (the)                             |
| Casper, A.M. Aramati           | Research Associate, Ecology and STEM education                                           | Colorado State University                                                | United States of America (the)                             |
| Casper, Markus                 | Professor for Physical Geography                                                         | University of Trier                                                      | Germany                                                    |
| Casquet, Juliane               | Coordinator of the LIFE FORECCAsT project and PhD in Ecology, Biodiversity and Evolution | Parc naturel régional du Haut-Languedoc                                  | France                                                     |
| Cass, Noel                     | Researcher                                                                               | Lancaster University                                                     | United Kingdom of Great Britain and Northern Ireland (the) |
| Cass, Alfred                   | Soil Scientist                                                                           | Alfred Cass & Associates                                                 | United States of America (the)                             |
| Cassabois, Guillaume           | Professor in Physics                                                                     | Montpellier University                                                   | France                                                     |
| Cassaigne, Ivonne              | PhD Veterinarian                                                                         | Primero Conservation                                                     | Mexico                                                     |
| Cassani, Marco                 | Post Doc                                                                                 | ICRC-FNUSA                                                               | Czech Republic (the)                                       |
| Cassardo, Claudio              | Professor, physics-climate-meteorology                                                   | Dept. of Physics, University of Torino                                   | Italy                                                      |
| Casselman, John M.             | Adjunct Professor                                                                        | Biology Department, Queen's University                                   | Canada                                                     |
| Cassotta, Manuela              | Biologist                                                                                | University of Trieste                                                    | Italy                                                      |
| Castagneri, Daniele            | MSCA post-doc, Forest Dynamics Unit                                                      | WSL                                                                      | Switzerland                                                |
| Castanho, Camila de Toledo     | Assistant professor                                                                      | Universidade Federal de São Paulo (UNIFESP)                              | Brazil                                                     |
| CASTANO, Sabine                | Assistant Professor / Biophysics-Spectroscopy                                            | CBMN-University Bordeaux                                                 | France                                                     |
| Castaño-Arboleda, Nicolas      | Associate researcher                                                                     | Instituto Sinchi                                                         | Colombia                                                   |
| CASTEGE, Iker                  | Director                                                                                 | Centre de la Mer de Biarritz                                             | France                                                     |
| Castellana, Daniele            | PhD candidate in Climate Physics                                                         | Utrecht University                                                       | Netherlands (the)                                          |
| Castellano, Gabriela           | Associate Professor, Physics                                                             | University of Campinas (UNICAMP)                                         | Brazil                                                     |
| Castellano, Immacolata         | Researcher                                                                               | Stazione zoologica Anton Dohrn                                           | Italy                                                      |
| Castellanos, Francisco         | Genetics student                                                                         | UNaM                                                                     | Argentina                                                  |
| Castellanos, Edwin             | Dean, Research Institute                                                                 | Universidad del Valle de Guatemala                                       | Guatemala                                                  |
| Castellanos-Galindo, Gustavo A | Postdoctoral Fellow / Marine Sciences                                                    | Smithsonian Tropical Research Institute                                  | Panama                                                     |
| Castello-Branco, Cristiana     | Postdoctoral fellow                                                                      | Smithsonian National Museum of Natural History                           | United States of America (the)                             |
| Castellví Corrons, Xavier      | PhD student                                                                              | University of Florence                                                   | Italy                                                      |
| Castilla, María Cecilia        | Doctora-Etnoecóloga                                                                      | Centro de Investigaciones y Transferencia de Catamarca CONICET UNCA      | Argentina                                                  |
| Castillo, Paula M.             | PhD in Chemistry. Nanotechnology.                                                        | Sevilla University                                                       | Spain                                                      |
| Castillo, Luciana Raquel       | Personal de Apoyo a la Investigación                                                     | Consejo Nacional de Investigaciones Científicas y Tecnológicas (CONICET) | Argentina                                                  |
| Castillo, Yerko                | Environmental Scientist                                                                  | Universidad Austral de Chile                                             | Chile                                                      |
| Castillo, Gonzalo              | Fish biologist                                                                           | USFWS                                                                    | United States of America (the)                             |
| Castillo, Maria Loreto         | Ecologist. PhD candidate                                                                 | Centre for Invasion Biology - Stellenbosch University                    | South Africa                                               |
| CASTILLO, RODOLFO              | Managing Director                                                                        | BIOCERAMIC RESTORATIVE MATERIAL                                          | United States of America (the)                             |
| CASTILLO, MARIA                | RESEARCHER                                                                               | CINVESTAV                                                                | Mexico                                                     |
| CASTILLO, Maria                | Anthropologist                                                                           | CINVESTAV                                                                | Mexico                                                     |
| Castillo A., Yerko             | Environmental Scientist                                                                  | Universidad Austral de Chile                                             | Chile                                                      |

|                                              |                                                                                |                                                                                                   |                                                            |
|----------------------------------------------|--------------------------------------------------------------------------------|---------------------------------------------------------------------------------------------------|------------------------------------------------------------|
| Castillo López, María                        | PhD Student (Biochemistry and Molecular Biology)                               | Centro de Investigaciones Biológicas (CSIC)                                                       | Spain                                                      |
| Castledine, Meaghan                          | PhD student in Evolutionary ecology                                            | University of Exeter                                                                              | United Kingdom of Great Britain and Northern Ireland (the) |
| Castrillon-Cifuentes, Ana Lucia              | Research / Coral reef Ecology                                                  | Coral Reef Ecology research group                                                                 | Colombia                                                   |
| Castro, José J.                              | Lecturer and Researcher in Marine Fisheries and Fish Biology                   | Universidad de Las Palmas de Gran Canaria (ULPGC), Canary Islands                                 | Spain                                                      |
| Castro, Jessica                              | Ecologist, contractor                                                          | International Institute of Tropical Forestry                                                      | Puerto Rico                                                |
| Castro, Ivone                                | Molecular biology                                                              | Health Secretary of Mexico City                                                                   | Mexico                                                     |
| Castro, Telma                                | Researcher/ Atmospheric Chemistry                                              | Universidad Nacional Autónoma de México                                                           | Mexico                                                     |
| Castro, Italo                                | Full Professor                                                                 | Institute of Marine Science - Universidade Federal de São Paulo                                   | Brazil                                                     |
| Castro, Francisca                            | Professor                                                                      | University of Córdoba                                                                             | Spain                                                      |
| Castro, Raul                                 | Research Seismologist and Professor                                            | Centro de Investigacion Cientifica y de Educacion Superior de Ensenada                            | Mexico                                                     |
| Castro Cobo, Sara                            | PhD candidate                                                                  |                                                                                                   | Spain                                                      |
| Castro Contreiras de Carvalho, Ignes Augusta | PhD in the Industrial Ecology group                                            | University of Lausanne                                                                            | Switzerland                                                |
| Castro Pena, João Carlos                     | Post doc fellow, Ecology                                                       | Unesp                                                                                             | Brazil                                                     |
| CASTRO ROMERO, TELMA                         | RESEARCHER                                                                     | INSTITUTO DE CIENCIAS DE LA ATMÓSFERA Y CAMBIO CLIMÁTICO, UNIVERSIDAD NACIONAL AUTÓNOMA DE MÉXICO | Mexico                                                     |
| Castro-Arellano, Ivan                        | Associate Professor                                                            | Texas State University                                                                            | United States of America (the)                             |
| Casura, Sarah                                | PhD Astrophysics                                                               | Universität Hamburg                                                                               | Germany                                                    |
| Caswell, Hal                                 | Professor of Mathematical Demography and Ecology                               | University of Amsterdam                                                                           | Netherlands (the)                                          |
| Catalán García, Núria                        | RESEARCHER IN BIOGEOCHEMISTRY                                                  | CATALAN INSTITUTE FOR WATER RESEARCH                                                              | Spain                                                      |
| Catalano, Francesca                          | Associate Dean of Math, Science and Engineering. Discipline: Molecular Biology | Kankakee Community College                                                                        | United States of America (the)                             |
| CATAPANI, MARIANA                            | PHD student                                                                    | University of Sao Paulo                                                                           | Brazil                                                     |
| CATELANI, Paula                              | Postdoctoral researcher                                                        | Universidade Federal do Rio de Janeiro                                                            | Brazil                                                     |
| Catellani, Patrizia                          | Professor of Social Psychology                                                 | Catholic University of Milan                                                                      | Italy                                                      |
| Catherine, Hänni                             | Ecology/ Evolutionary sciences                                                 | CNRS France                                                                                       | France                                                     |
| Catherine, Turlan                            | Research engineer                                                              | CNRS                                                                                              | France                                                     |
| Catry, Teresa                                | Research Assistant                                                             | Faculty of Sciences, University of Lisbon                                                         | Portugal                                                   |
| Catry, Filipe                                | Researcher                                                                     | CEABN/InBIO, University of Lisbon                                                                 | Portugal                                                   |
| Cattaneo, Claudio                            | Associate Professor Ecological Economics                                       | Autonomous University of Barcelona                                                                | Spain                                                      |
| Cattanéo, Franck                             | Professor, Aquatic Ecology                                                     | University of Applied Sciences and Arts Western Switzerland - Hepia Geneva                        | Switzerland                                                |
| Cattani, Eduardo                             | Mathematics                                                                    | University of Massachusetts Amherst                                                               | United States of America (the)                             |
| Cattaud, Vanessa                             | Post Doc in Neuroscience                                                       | University of Alberta                                                                             | Canada                                                     |
| Catterall, Claudia                           | Lecturer, Ecology                                                              | Southern Cross University                                                                         | Australia                                                  |
| Catzeflis, Francois                          | Biologist, Emeritus Research Director                                          | University of Montpellier and CNRS                                                                | France                                                     |

|                                 |                                                        |                                                                   |                                                            |
|---------------------------------|--------------------------------------------------------|-------------------------------------------------------------------|------------------------------------------------------------|
| Cauchard, Laure                 | Postdoctoral Researcher                                | University of Aberdeen                                            | United Kingdom of Great Britain and Northern Ireland (the) |
| Cauchi, John Paul               | Environmental Public health                            | Queensland University of Technology                               | Australia                                                  |
| Cauchi, Marija                  | Doctor of Medicine                                     | Malta neurosciences dept                                          | Malta                                                      |
| Cauchi, Daniel                  | Public Health                                          | University of Malta                                               | Malta                                                      |
| Cauda, Franco                   | Associate Professor in Psychophysiology                | Università di Torino                                              | Italy                                                      |
| Cauet, Eva                      | Postdoc in Physics Didactics                           | University of Koblenz-Landau                                      | Germany                                                    |
| Caujapé-Castells, Juli          | Director and Head of Research                          | Jardin Botanico Canario "Viera y Clavijo"-Unidad Asociada al CSIC | Spain                                                      |
| Caulier, Guillaume              | Post-doc in Marine Biology                             | UMONS                                                             | Belgium                                                    |
| Cauvy-Fraunié, Sophie           | Hydroecology                                           | IRSTEA                                                            | France                                                     |
| Cavalcanti, Clóvis              | Past President                                         | International Society for Ecological Economics                    | Brazil                                                     |
| Cavallari, Carla                | Pedagogy Student                                       | Senac                                                             | Brazil                                                     |
| Cavallero, Laura                | Researcher                                             | CONICET                                                           | Argentina                                                  |
| Cavalli, Laura                  | Economist, Senior researcher -Agenda 2030-             | FEEM, Milan                                                       | Italy                                                      |
| Cavallin Toscani, Antonio       | Phd student in Management Engineering                  | Department of Management and Engineering, University of Padova    | Italy                                                      |
| Cavarzere, Vagner               | Profesor                                               | Universidade Tecnológica Federal do Paraná                        | Brazil                                                     |
| Cavazos, Tereza                 | Chair of the Graduate Program in Physical Oceanography | CICESE                                                            | Mexico                                                     |
| Cave, Ronald                    | University Professor                                   | University of Florida                                             | United States of America (the)                             |
| CAVE, JEREMIE                   | PhD in Urban Planning                                  | Sciences Po Toulouse                                              | France                                                     |
| cavelier, sacha                 | Biomedical engineering                                 | Queensland University of Technology                               | Australia                                                  |
| Cavicchioli, Ricardo            | Professor                                              | UNSW Sydney                                                       | Australia                                                  |
| Cavigliasso, Fanny              | Postdoc researcher                                     | University of Lausanne                                            | Switzerland                                                |
| Cavitte, Marie                  | postdoc, glaciology+modelling                          | UC Louvain, Belgium                                               | Belgium                                                    |
| Cawley, Oisin                   | Lecturer and Researcher                                | Institute of Technology Carlow                                    | Ireland                                                    |
| Cayetano, Denver                | Forest Biologist                                       | University of Belize Environmental Research Institute             | Belize                                                     |
| Cayocca, Florence               | Head of the Department of Coastal Ecosystems Dynamics  | Ifremer                                                           | France                                                     |
| Cayuela, Luis                   | Associate Professor                                    | Universidad Rey Juan Carlos                                       | Spain                                                      |
| Cazalé-Debat, Laurie            | PhD student in chemical ecology                        | Centre des sciences du gout et de l'alimentation                  | France                                                     |
| Cazelles, Bernard               | Professor                                              | Sorbonne University                                               | France                                                     |
| Cazelles, Kevin                 | Postdoc                                                | University of Guelph                                              | Canada                                                     |
| Cazorzi, Federico               | Glaciologist and Professor in Hydrology                | University of Udine                                               | Italy                                                      |
| Cearreta, Alejandro             | Professor of Paleontology                              | University of the Basque Country UPV/EHU                          | Spain                                                      |
| Ceballos, Leonardo              | Biology                                                |                                                                   | Italy                                                      |
| Ceballos, Elvira                | Técnico Especializado de OPIs                          | Instituto Español de Oceanografía                                 | Spain                                                      |
| Ceballos, Gerardo               | Professor                                              | Universidad Nacional Autonoma de Mexico                           | Mexico                                                     |
| Ceballos Herrero, Mª Inmaculada | Chemist                                                | Ministry of Education and Science Spain                           | Spain                                                      |
| Cebašek-Travnik, Zdenka         | Psychiatrist                                           | Councilor                                                         | Slovenia                                                   |
| Cebulska, Klaudia               | PhD student, Hydrobiology                              | University of Silesia in Katowice                                 | Poland                                                     |

|                               |                                                    |                                                                       |                                                            |
|-------------------------------|----------------------------------------------------|-----------------------------------------------------------------------|------------------------------------------------------------|
| Ceccarelli, Alessandro        | Biotech                                            |                                                                       | United Kingdom of Great Britain and Northern Ireland (the) |
| Cecconi, Baptiste             | Astronomer                                         | Observatoire de Paris                                                 | France                                                     |
| Cecil, John                   | Conservation Biologist                             |                                                                       | United States of America (the)                             |
| Cecilia, Helene               | PhD student in epidemiological modelling           | INRA                                                                  | France                                                     |
| Cedano Villavicencio, Karla   | Head of Technology Management an Liaison           | Instituto de Energías Renovables - UNAM                               | Mexico                                                     |
| Cederwall, Jeffrey            | PhD Student, Biology                               | Queen's University                                                    | Canada                                                     |
| Cedr s-Perdomo, Ruym n David  | PhD Student                                        | University of La Laguna                                               | Spain                                                      |
| Ceesau, Adam                  | Conservation                                       |                                                                       | Senegal                                                    |
| Celentano, Danielle           | Professor                                          | Universidade Estadual do Maranh o (UEMA)                              | Brazil                                                     |
| C line, Albert                | PhD Student / Ecotoxicologie                       | LIENSs                                                                | France                                                     |
| Celis-Diez, Juan L.           | Professor of Conservation Biology                  | Escuela de Agronom a, Pontificia Universidad Cat lica de Valpara so   | Chile                                                      |
| Cellarius, Richard            | Emeritus Member of the Faculty                     | The Evergreen State College, Olympia, WA                              | United States of America (the)                             |
| C lleri, Rolando              | Professor                                          | Universidad de Cuenca                                                 | Ecuador                                                    |
| Cendales-Rojas, Lillan Andrea | Biologist                                          | Universitat de Barcelona                                              | Colombia                                                   |
| Centuri n Carrera, Alejandra  | PhD Candidate in Ecology                           | Universit t Bremen                                                    | Germany                                                    |
| Cenzano, Ana M.               | Associate Researcher, CONICET                      | IPEEC-CONICET                                                         | Argentina                                                  |
| Ceola, Serena                 | Assistant Professor                                | University of Bologna                                                 | Italy                                                      |
| Cerabolini, Bruno E.L.        | Full Professor of Environmental and Applied Botany | DBSV - University of Insubria                                         | Italy                                                      |
| Cerdeira, Hilda               | Physics                                            | Instituto de F sica Te rica - IFT-UNESP                               | Brazil                                                     |
| Cerdeira, Louise              | Research fellow                                    | Usp                                                                   | Brazil                                                     |
| Cereghetti, Eva               | PhD in Aquatic Ecology                             | University of Zurich                                                  | Switzerland                                                |
| Cereghino, Regis              | Professor                                          | Unversity of Toulouse                                                 | France                                                     |
| Cereghino, Paul               | Restoration Ecologist                              | National Marine Fisheries Service                                     | United States of America (the)                             |
| Ceron, Karoline               | PhD. candidate in Ecology and Conservation at UFMS | Universidade Federal do Mato Grosso do Sul                            | Brazil                                                     |
| Cerqueira, Rui                | Professor of Ecology                               | Universidade Federal do Rio de Janeiro                                | Brazil                                                     |
| Cerqueira, Marco              | PhD researcher                                     | CCMAR                                                                 | Portugal                                                   |
| Cerqueira, M rio              | Assistant Professor                                | University of Aveiro                                                  | Portugal                                                   |
| Cerqueira, Marco              | Researcher Pos-Doc                                 | CCMAR                                                                 | Portugal                                                   |
| Cerrano, Carlo                | Professor of Zoology                               | Universit  Politecnica delle Marche                                   | Italy                                                      |
| Cerrilla, Cecilia             | Conservation Biology MSc Candidate                 | Fitzpatrick Institute of African Ornithology, University of Cape Town | South Africa                                               |
| Cerrillo, Patricia            | Co-founder                                         | Grupo de Investigaci n de Mam feros Marinos A.C.                      | Mexico                                                     |
| Cerroni, Fabio                | Phd Student                                        | Sapienza University of Rome                                           | Italy                                                      |
| Cerutti, Nicola               | Postdoctoral researcher, Economics                 | University of Verona                                                  | Italy                                                      |
| Cerutti, Paolo Omar           | Forester                                           | Center for International Forestry Research (CIFOR)                    | Kenya                                                      |
| Cerveira Lima, Raul           | Adjunct Professor/ Physics and Light Pollution     | Escola Superior de Sa de do Polit cnico do Porto + CITEUC             | Portugal                                                   |
| Cervenka, Emily               | Cell and Molecular Biology                         | Concordia University                                                  | Canada                                                     |
| Cervera, Maria                | PhD in Neuroinformatics                            | ETH Zurich                                                            | Switzerland                                                |

|                             |                                                                  |                                                                                |                                                            |
|-----------------------------|------------------------------------------------------------------|--------------------------------------------------------------------------------|------------------------------------------------------------|
| César de Sá, Nuno           | PhD on Remote Sensing for nature conservation                    | CML - Leiden University                                                        | Netherlands (the)                                          |
| Ceschia, Eric               | Ecology and remote sensing                                       | INRA                                                                           | France                                                     |
| Cespi, Daniele              | Senior assistant professor                                       | Department of Industrial Chemistry "Toso Montanari"<br>- University of Bologna | Italy                                                      |
| Cetinic, Katarina           | PhD                                                              | Trent University                                                               | Canada                                                     |
| Cezar Geroto, Caio Fabricio | Professor of Paleontology                                        | Universidade Paulista                                                          | Brazil                                                     |
| CEZILLY, FRANK              | PROFESSOR                                                        | UNIVERSITE DE BOURGOGNE                                                        | France                                                     |
| Chabaud, Chloé              | PhD student in Evolutionary Ecology                              | iEES Paris and CEBC Chizé                                                      | France                                                     |
| Chabert, Eric               | PhD student                                                      | Avignon Université                                                             | France                                                     |
| Chabert, Ariane             | Lecturer Agroecology and Entomology                              | Toulouse Institut National Polytechnique ENSAT                                 | France                                                     |
| Chaboo, Caroline            | Systematic Entomology                                            | University of Nebraska-Lincoln                                                 | United States of America (the)                             |
| Chabriac, Pierre-Antoine    | Professor in Civil Engineering                                   | Ecole Nationale Supérieure d'Architecture de Bretagne                          | France                                                     |
| Chacón, M. Gema             | Researcher / Prehistory and Human Evolution                      | IPHES (Institut Català de Paleoecologia Humana i Evolució Social)              | Spain                                                      |
| Chae, Eunyoung              | Assistant Professor in Biology                                   | National University of Singapore                                               | Singapore                                                  |
| Chàfer Nicolás, Marta       | PhD Student / Greenery systems for UHI mitigation                | University of Lleida                                                           | Spain                                                      |
| Chagas, Tássia              | Post doctoral student in Applied Ecology                         | Federal University of Lavras                                                   | Brazil                                                     |
| Chahinian, N                | Hydrologist                                                      | Institut de Recherches pour le Développement (IRD)                             | France                                                     |
| Chaimovich, Hernan          | Emeritus Professor of Chemistry                                  | Instituto de Química, Universidade de São Paulo                                | Brazil                                                     |
| Chakarov, Nayden            | Researcher                                                       | Dept. of Animal Behaviour, Bielefeld University                                | Germany                                                    |
| Chakrabarty, Prosanta       | George H. Lowery Jr. Professor/Curator of Fishes                 | Louisiana State University Museum of Natural Science                           | United States of America (the)                             |
| Chakraborty, Subrata        | Professor, Statistics                                            | Dibrugarh University                                                           | India                                                      |
| CHAKRABORTY, Avishikta      | PhD student/biological sciences                                  | Monash University                                                              | Australia                                                  |
| Chakravarthi, Aravin        | PhD (Functional Zoology)                                         | Lund University                                                                | Sweden                                                     |
| Chalen, Izan                | Molecular Biologist                                              | Universidad San Francisco de Quito USFQ                                        | Ecuador                                                    |
| Challenger, Antony          | Postdoctoral researcher, ecology and environmental public policy | Instituto de Ecologia, S.A.                                                    | Mexico                                                     |
| Chalouni, Cecile            |                                                                  | Genentech                                                                      | United States of America (the)                             |
| Chaluvadi, Sandeep Kumar    | Postdoctoral researcher/condensed matter physics                 | Cnr iom                                                                        | Italy                                                      |
| Chamberlain, Kevin          | Geology Research Professor                                       | University of Wyoming                                                          | United States of America (the)                             |
| Chames, Patrick             | Research director                                                | Cnrs                                                                           | France                                                     |
| Champreux, Antoine          | PhD student in Palaeoecology                                     | Flinders University (Adelaide)                                                 | Australia                                                  |
| chan, Moses                 | Professor of Physics, Emeritus                                   | Penn State University                                                          | United States of America (the)                             |
| Chan, Man-pui Sally         | Research Assistant Professor                                     | University of Illinois                                                         | United States of America (the)                             |
| Chan, Kai                   | Professor, Sustainability and Conservation Science               | University of British Columbia                                                 | Canada                                                     |
| Chan, Kevin                 | Associate Professor, Faculty of Medicine                         | University of Toronto                                                          | Canada                                                     |
| Chan, Edmund                | PhD student in Physics                                           | University of Exeter                                                           | United Kingdom of Great Britain and Northern Ireland (the) |
| Chan, Moses                 | Evan Pugh University Professor of Physics, Emeritus              | Penn State University                                                          | United States of America (the)                             |
| Chanard, Kristel            | Research scientist                                               | IPGP/IGN                                                                       | France                                                     |
| Chancellor, Nicholas        | Research fellow                                                  | Durham University                                                              | United Kingdom of Great Britain and Northern Ireland (the) |

|                            |                                                                 |                                                                                    |                                                            |
|----------------------------|-----------------------------------------------------------------|------------------------------------------------------------------------------------|------------------------------------------------------------|
| Chandler, Caroline         | Environmental Scientist                                         |                                                                                    | Peru                                                       |
| Chandrasekaran, Sriikiran  | Graduate student                                                | University of California Irvine                                                    | United States of America (the)                             |
| Chang, Yuan-Pin            | Associate :Professor                                            | Department of Oceanography, National Sun Yat-sen University                        | Taiwan                                                     |
| Chang, Manyu               | researcher                                                      | Federal University of Paraná                                                       | Brazil                                                     |
| Chani Posse, Mariana       | Researcher                                                      | IADIZA - CCT CONICET Mendoza                                                       | Argentina                                                  |
| Chanut, Pierre             | Ecology                                                         | ETH Zurich                                                                         | Switzerland                                                |
| Chao, Jung-Tai             | Senior Research Scientist                                       | Taiwan Forestry Research Institution                                               | Taiwan                                                     |
| CHAOUI EL FAIZ, Kaoutar    | Geosciences                                                     | Université de Reims Champagne Ardenne                                              | Morocco                                                    |
| Chapelier, Claude          | Physicist                                                       | CEA                                                                                | France                                                     |
| Chapin, Kenneth            | Postdoctoral Researcher                                         | University of Arizona                                                              | United States of America (the)                             |
| Chapin, Thomas             | Intern Ecologist                                                | Smithsonian Environmental Research Center                                          | United States of America (the)                             |
| Chaplin, Vernon            | Plasma Physicist                                                |                                                                                    | United States of America (the)                             |
| Chapman, Sarah             | Research Fellow                                                 | University of Leeds                                                                | United Kingdom of Great Britain and Northern Ireland (the) |
| Chapman, Katy              | Associate Professor and Director of Sustainability              | University of Minnesota Crookston                                                  | United States of America (the)                             |
| Chapman, John              | Adjunct, Dept Fisheries, Wildlife and Conservation              | Oregon State University                                                            | United States of America (the)                             |
| Chapman, Laura             | Associate Lecturer in Ecology                                   | University of York                                                                 | United Kingdom of Great Britain and Northern Ireland (the) |
| Chapman AO PhD, Simon      | Emeritus Professor                                              | School of Public Health, University of Sydney                                      | Australia                                                  |
| Chapuisat, Michel          | Professor - Evolution                                           | University of Lausanne                                                             | Switzerland                                                |
| Charalambides, George      | Marine Biology                                                  | The Scottish Association for Marine Science                                        | United Kingdom of Great Britain and Northern Ireland (the) |
| Charalambous, Constantinos | Ecologist                                                       |                                                                                    | Cyprus                                                     |
| Charalambous, Georgia      | Researcher                                                      | Charite                                                                            | Germany                                                    |
| Charavel, Valerie          | Environmental educator                                          | Botanic Garden Meise                                                               | Belgium                                                    |
| Charbonnel, Nathalie       | Senior researcher                                               | INRA                                                                               | France                                                     |
| Charette, Tania            | Biologist                                                       | University of Montreal                                                             | Canada                                                     |
| Charguéraud, Arthur        | Researcher in Computer Science                                  | Inria                                                                              | France                                                     |
| CHARGUI, Sameh             | Researcher-associate professor                                  | Georesources Laboratory, Water Research and Technology Centre, Borj Cedria Ecopark | Tunisia                                                    |
| Charles, Steve             | Senior Research Scientist                                       | CSIRO                                                                              | Australia                                                  |
| Charles N., Kuria          | Forest Growth and Yield Modeler                                 | Kenya Forest Service                                                               | Kenya                                                      |
| Charli-Joseph, Lakshmi     | Research assistant/Academic technician - Sustainability Science | LANCIS-IE-UNAM                                                                     | Mexico                                                     |
| Charmantier, Anne          | Evolutionary Ecologist                                          | CNRS                                                                               | France                                                     |
| Charpentier, Marie         | Director of researches/Behavioral ecology                       | CNRS                                                                               | France                                                     |
| Charpentier, Mathilde      | Civilian Service, M.D.                                          | Tour du Valat                                                                      | France                                                     |
| CHARPENTIER, Jean Paul     | INGENIEUR RECHERCHE, Forest scientist                           | INRA                                                                               | France                                                     |
| Charrier, Bénédicte        | Research Director                                               | CNRS                                                                               | France                                                     |
| Charrier, Guillaume        | Plant ecophysiologicalist                                       | INRA                                                                               | France                                                     |
| Charrier, N. Pierre        | Ecology and Evolution, PhD                                      | Pôle emploi                                                                        | France                                                     |



|                           |                                                         |                                                                |                                                            |
|---------------------------|---------------------------------------------------------|----------------------------------------------------------------|------------------------------------------------------------|
| Charrier, Grégory         | Associate professor                                     | University of Brest                                            | France                                                     |
| CHARRIER, MARYVONNE       | Associate Professor and Ecophysiologicalist             | University of Rennes 1                                         | France                                                     |
| Chartier, Christophe      | Professor Cattle Medicine                               | UMR INRA Oniris                                                | France                                                     |
| Chartier, Marion          | Senior Scientist                                        | University of Vienna                                           | Austria                                                    |
| Chase, Madeline           |                                                         | Uppsala University                                             | Sweden                                                     |
| Chassot, Olivier          | Program Director, Regenerative Costa Rica               | University for International Cooperation                       | Costa Rica                                                 |
| Chaste, Pauline           | Psychiatry Genetics                                     | INSERM                                                         | France                                                     |
| Chateigner, Daniel        | Professor                                               | Université de Caen Normandie                                   | France                                                     |
| Chateigner, Aurelien      | Post-doc                                                | INRA                                                           | France                                                     |
| Chater, Caspar            | Research Fellow/Plant Science                           | The University of Sheffield                                    | United Kingdom of Great Britain and Northern Ireland (the) |
| Chattington, Sophie       | PhD Candidate - Population & Evolutionary Ecology       | University of Bremen                                           | Germany                                                    |
| Chattopadhyay, Sreeparna  | Anthropology, Associate Professor                       | FLAME University                                               | India                                                      |
| Chatzaras, Gerasimos      | Electrical Energy Consumption Analyst                   |                                                                | Greece                                                     |
| Chatzistergos, Theodosios | Post Doc Solar Physics                                  | INAF OAR                                                       | Italy                                                      |
| Chauchard, Sandrine       | Assistant professor - Ecology                           | Université de Lorraine                                         | France                                                     |
| Chauhan, Radha            | Scientist                                               | National Centre for Cell Science                               | India                                                      |
| Chaumillon, Eric          | Professor in Marine Geology                             | University of La Rochelle                                      | France                                                     |
| Chaumon, Maximilien       | PhD, Research Associate, Neuroscience                   | Brain & Spine Institute (ICM), Paris                           | France                                                     |
| Chautems, Alain           | Senior Research Associate/Plant Taxonomy                | Conservatoire et Jardin botaniques de la Ville de Genève       | Switzerland                                                |
| Chaval, Yannick           | Engineer assistant                                      | French National Institute for Agricultural Research            | France                                                     |
| Chavan, Sachin            | Research Fellow                                         | Hawkesbury Institute for the Environment                       | Australia                                                  |
| Chave, Emmanuelle         | veterinarian                                            |                                                                | France                                                     |
| Chaves, Patricia          | Biologist                                               | Faculdade de Ciências da Universidade de Lisboa                | Portugal                                                   |
| Chavez, John              | Library Faculty - Information Science Division          | Paradise Valley Community College                              | United States of America (the)                             |
| Chavez, Francisco P.      | Assistant Professor                                     | University of Chile                                            | Chile                                                      |
| Chehébar, Claudio         | Conservation and Wildlife Biologist                     | Administración de Parques Nacionales                           | Argentina                                                  |
| Chekol, Yeshambel         | Animal Nutritionist                                     | Bahir Dar University                                           | Ethiopia                                                   |
| Chelliah, Alvin           | Marine scientist                                        | Reef check malaysia                                            | Malaysia                                                   |
| Chelton, Dudley           | Emeritus Professor of Oceanic and Atmospheric Sciences  | Oregon State University                                        | United States of America (the)                             |
| Chemello, Renato          | Associate Professor in Ecology and Conservation Biology | Department of Earth and Marine Sciences, University of Palermo | Italy                                                      |
| Chen, Kai                 | Lecturer                                                | Nanjing Agricultural University                                | China                                                      |
| Chen, Yu                  | Physics Graduate Student                                | Penn State University                                          | United States of America (the)                             |
| Chen, Susan               |                                                         | Illinois State University                                      | United States of America (the)                             |
| Chen, Hua                 | Professor of Ecology                                    | University of Illinois at Springfield                          | United States of America (the)                             |
| Chen, Celia               | Research Professor                                      | Dartmouth College                                              | United States of America (the)                             |
| Chen, Chaolun Allen       | Research Professor/ Marine Biodiversity                 | Biodiversity Research Centre, Academia Sinica, Taiwan          | Taiwan                                                     |
| Chen, Xuanlin             | Postdoc                                                 | MPIDS                                                          | Germany                                                    |

|                                  |                                                                             |                                                                                                    |                                                            |
|----------------------------------|-----------------------------------------------------------------------------|----------------------------------------------------------------------------------------------------|------------------------------------------------------------|
| Chenuil, Anne                    | Senior scientist                                                            | CNRS                                                                                               | France                                                     |
| CHEREL, Yves                     | Directeur de recherche                                                      | CNRS                                                                                               | France                                                     |
| Cheriet, Mohamed                 | Full Professor, Sustainable ICT                                             | University of Quebec's Ecole de technologie superieure                                             | Canada                                                     |
| Cherif, Mehdi                    | Associate Professor                                                         | Ecology and Environmental Science Dept, Umeå University                                            | Sweden                                                     |
| Cherix, Daniel                   | Professor/ Ecology                                                          | Departement of Ecology and Evolution, University of Lausanne                                       | Switzerland                                                |
| Chernicky, Kiley                 | Environmental Biology                                                       |                                                                                                    | United States of America (the)                             |
| cherry, jon                      | research assistant                                                          | newcastle university                                                                               | United Kingdom of Great Britain and Northern Ireland (the) |
| Chester, Emily                   | Research Associate, Anthropology                                            | Indiana University                                                                                 | United States of America (the)                             |
| Chester, Sheryan Epperly         | marine scientist                                                            | retired (U.S. government)                                                                          | United States of America (the)                             |
| Chester, Charles                 | Assistant Adjunct Professor                                                 | Tufts University                                                                                   | United States of America (the)                             |
| Chettri, Nakul                   | Sr Biodiversity Specialists and Programme Manager - Transboundary Landscape | International Centre for Integrated Mountain Development                                           | Nepal                                                      |
| chevalier, laurent               | physicist                                                                   | Université Paris-Saclay                                                                            | France                                                     |
| Chevalier, Mathieu               | PhD                                                                         | Université de Lausanne                                                                             | Switzerland                                                |
| CHEVALIER, Patrick               | Professeur en retraite                                                      |                                                                                                    | France                                                     |
| Chevallereau, Anne               | Post-doctoral Researcher / Microbiology                                     | University of Exeter                                                                               | United Kingdom of Great Britain and Northern Ireland (the) |
| chevallier, stephanie            | Dr                                                                          | INSERM                                                                                             | France                                                     |
| Chevallier, Damien               |                                                                             | CNRS                                                                                               | France                                                     |
| Chevallier, Coralie              | Researcher                                                                  | INSERM - ENS                                                                                       | France                                                     |
| Chèvre, Nathalie                 | Lecturer ecotoxicology                                                      | University of Lausanne                                                                             | Switzerland                                                |
| Cheynel, Louise                  | Post doctoral research associate                                            | University of Liverpool                                                                            | United Kingdom of Great Britain and Northern Ireland (the) |
| Chia, Camille                    | Research project manager                                                    | University of California Riverside                                                                 | United States of America (the)                             |
| Chiantore, Mariachiara           | Associate Professor in Ecology                                              | University of Genova                                                                               | Italy                                                      |
| Chiappa-Carrara, Xavier          | Professor / Coastal Ecology                                                 | Universidad Nacional Autónoma de México                                                            | Mexico                                                     |
| Chiarucci, Alessandro            | Full Professor Plant Ecology and Conservation Biology                       | Alma Mater Universitatis - University of Bologna                                                   | Italy                                                      |
| Chiavetta, Ugo                   | Research scientist                                                          | Council for Agricultural Research and Economics (CREA)                                             | Italy                                                      |
| Chibesa, Moses                   | Lecturer - Ecological Sciences                                              | The Copperbelt University, School of Natural Resources                                             | Zambia                                                     |
| Chichorro, Filipe                | PhD Student - Conservation / Ecology                                        | Finnish Museum of Natural History                                                                  | Finland                                                    |
| Chidichimo, Maria Paz            | Researcher - Physical Oceanography                                          | Consejo Nacional de Investigaciones Científicas y Técnicas (CONICET), Buenos Aires, Argentina      | Argentina                                                  |
| Chikere, Professor Chioma Blaise | Professor of Environmental Microbiology and Biotechnology                   | University of Port Harcourt, Nigeria; Academic Associate, University of South Africa, South Africa | Nigeria                                                    |
| Childress, Michael               | Associate Professor of Biological Sciences                                  | Clemson University                                                                                 | United States of America (the)                             |
| Chillon, Isabel                  | Postdoctoral fellow                                                         | EMBL                                                                                               | France                                                     |
| Chin, Jamille                    | Urban Planning Consultant                                                   | PR Planner                                                                                         | Jamaica                                                    |

|                                |                                                                           |                                                                                           |                                                            |
|--------------------------------|---------------------------------------------------------------------------|-------------------------------------------------------------------------------------------|------------------------------------------------------------|
| Chiquetto, Julio               | Post-doctorate researcher                                                 | University of Sao Paulo                                                                   | Brazil                                                     |
| Chiri, Eleonora                | Postdoctoral Research Fellow/Environmental Microbiology                   |                                                                                           | Australia                                                  |
| Chirichella, Roberta           | Postdoc                                                                   | University of Sassari                                                                     | Italy                                                      |
| Chirif, Alberto                | Antropólogo                                                               | Independiente                                                                             | Peru                                                       |
| Chirivi, Renato                | CSO / drug discovery                                                      |                                                                                           | Netherlands (the)                                          |
| Chiron, François               | Assistant Professor                                                       | Université Paris-Saclay                                                                   | France                                                     |
| Chiron, Catherine              | Director of research (Medicine and Neurosciences)                         | National Institute of Health and Medical Research (INSERM)                                | France                                                     |
| Chitayat, Adrienne             | Wildlife conservation                                                     | University of Amsterdam                                                                   | United States of America (the)                             |
| Chivers, David                 | University Reader Emeritus                                                | Selwyn College, University of Cambridge                                                   | United Kingdom of Great Britain and Northern Ireland (the) |
| Chivian, Eric                  | Founder and Former Director, Center for Health and the Global Environment | Harvard Medical School                                                                    | United States of America (the)                             |
| Cho, In-Young                  | Researcher                                                                | National Marine Biodiversity Institute of Korea                                           | Korea (the Republic of)                                    |
| Choi, Young-jin                | Politics, Philosophy & Economics (PPE)                                    |                                                                                           | Germany                                                    |
| Choi, Ja Yeon                  | Research Scientist / Energy materials                                     | Ballard Power Systems, Inc                                                                | Canada                                                     |
| Choi, Ryan                     | Graduate Student - Ecology                                                | Utah State University                                                                     | United States of America (the)                             |
| CHOI, JE-YONG                  | Professor                                                                 | Dept. of Biochemistry and Cell Biology, School of Medicine, Kyungpook National University | Korea (the Republic of)                                    |
| CHOLER, Philippe               | Senior researcher                                                         | CNRS                                                                                      | France                                                     |
| Cholewińska, Olga              | PhD student, Biology                                                      | Faculty of Biology, University of Warsaw                                                  | Poland                                                     |
| Chong, Ju Lian                 | Senior Lecturer/ Conservation Biology                                     | Universiti Malaysia Terengganu                                                            | Malaysia                                                   |
| Chonova, Teofana               | Postdoc                                                                   | INRA, France                                                                              | France                                                     |
| Choo, Johanna                  | Associate Teaching Professor                                              | University of Massachusetts Lowell                                                        | United States of America (the)                             |
| Choong, Amy                    | Lecturer                                                                  | National University of Singapore                                                          | Singapore                                                  |
| Chopara, Rishika               | PhD student                                                               | University of Auckland                                                                    | New Zealand                                                |
| Choppin, Marina                | PhD candidate in Evolutionary Biology                                     | Johannes Gutenberg University (IOME)                                                      | Germany                                                    |
| Chopping, Mark                 | Professor, Remote Sensing                                                 | Montclair State University                                                                | United States of America (the)                             |
| Choquet, Marvin                | Postdoctoral position zooplankton population genomics                     | Nord University                                                                           | Norway                                                     |
| Chores, Yael                   | PhD student, Environmental management                                     | University of Haifa                                                                       | Israel                                                     |
| Chouaia, Bessem                | Assistant Professor of Microbiology                                       | Ca' Foscari University of Venice                                                          | Italy                                                      |
| Chow, Fotini                   | Professor, Civil and Environmental Engineering                            | University of California, Berkeley                                                        | United States of America (the)                             |
| Chow, Gwendolyn                | Conservation                                                              | Resorts World Sentosa - S.E.A.A.                                                          | Singapore                                                  |
| Chowdhry Beeman, Jai           | Doctoral Candidate                                                        | Institut des Géosciences de l'Environnement / Université Grenoble Alpes                   | France                                                     |
| Chowdhury, Gawsia Wahidunnessa | Associate Professor, Department of Zoology                                | University of Dhaka                                                                       | Bangladesh                                                 |
| Chowdhury, Shawan              | Finalising PhD                                                            | University of Queensland                                                                  | Bangladesh                                                 |
| Chozas, Sergio                 | Post Doc Researcher                                                       | cE3c - FCUL Lisbon University                                                             | Portugal                                                   |
| Chraibi, Eric                  | PhD Student - Remote Sensing                                              | IRSTEA                                                                                    | France                                                     |
| Chrétien, Emmanuelle           | PhD Candidate, biological sciences                                        | Université de Montréal                                                                    | Canada                                                     |

|                               |                                                                                                |                                                                                           |                                                            |
|-------------------------------|------------------------------------------------------------------------------------------------|-------------------------------------------------------------------------------------------|------------------------------------------------------------|
| Christ, Anderson              | Biology                                                                                        | Instituto Federal Catarinense                                                             | Brazil                                                     |
| Christensen, Larry            | Former Section Chief                                                                           | Former Minnesota Pollution Control Agency - Retired                                       | United States of America (the)                             |
| Christensen, Charlotte        | PhD student                                                                                    | Swansea University                                                                        | United Kingdom of Great Britain and Northern Ireland (the) |
| Christensen, Mikkel           | Project manager / Aquaculture                                                                  | South West catchments Council                                                             | Australia                                                  |
| Christensen, Dain L.          | Graduate Assistant                                                                             | University of Hawaii                                                                      | United States of America (the)                             |
| christian, ré                 | technicien de laboratoire                                                                      | Institut Méditerranéen d'Océanologie- CNRS                                                | France                                                     |
| Christianini, Alexander       | Associate Professor of Ecology                                                                 | Universidade Federal de São Carlos                                                        | Brazil                                                     |
| Christiansen, Sabine          | Researcher/Biologist                                                                           | IASS                                                                                      | Germany                                                    |
| Christiansen, Henrik          | Marine Biologist                                                                               | KU Leuven                                                                                 | Belgium                                                    |
| Christie, Mary                | Environmental Scientist                                                                        |                                                                                           | United States of America (the)                             |
| christine, robles             | Ecology, assistant professor                                                                   | aix marseille université                                                                  | France                                                     |
| Christophe, Piscart           | Researcher in Aquatic Ecology                                                                  | CNRS                                                                                      | France                                                     |
| Chu, Ellen W                  | Ecologist and Editor                                                                           | US Government Accountability Office (retired)                                             | United States of America (the)                             |
| Chu, Cindy                    | Freshwater Fish Research Scientist                                                             | Ontario Ministry of Natural Resources and Forestry                                        | Canada                                                     |
| Chua, Elvin                   | Chemistry                                                                                      |                                                                                           | Singapore                                                  |
| Chuard, Pierre                | Research Associate, Contract Faculty, Ecology                                                  | Bishop's University                                                                       | Canada                                                     |
| Chucholl, Christoph           | Research Scientist                                                                             | Eco Surv                                                                                  | Germany                                                    |
| Chuctaya, Junior              | PhD student in Animal biology                                                                  | Universidade Federal de Rio Grande do Sul                                                 | Brazil                                                     |
| CHUPIN, Clémence              | PHD Student                                                                                    | LIENSs, UMR 7266                                                                          | France                                                     |
| Churski, Marcin               | researcher/ecology                                                                             | MRI PAS Białowieża                                                                        | Poland                                                     |
| Ciais, Philippe               | researcher                                                                                     | CEA LSCE                                                                                  | France                                                     |
| Čiamporová-Zaťovičová, Zuzana | senior researcher/ freshwater biology                                                          | Slovak Academy of Sciences, Plant Science and Biodiversity Centre                         | Slovakia                                                   |
| Cianciaruso, Marcus           | Associate Professor in Ecology and Evolution                                                   | Universidade Federal de Goiás                                                             | Brazil                                                     |
| Cianferoni, Fabio             | Entomology                                                                                     | National Research Council of Italy & Natural History Museum of the University of Florence | Italy                                                      |
| CIBIEL, Agnès                 | Project leader in Biology                                                                      |                                                                                           | France                                                     |
| Cibois, Alice                 | Researcher, Ornithology                                                                        | Natural History Museum of Geneva                                                          | Switzerland                                                |
| Ciccarese, Lorenzo            | Head of Division for Species and Habitat Conservation and Sustainable Agriculture and Forestry | National Institute for Environmental Protection and Research                              | Italy                                                      |
| Cid Puey, Nuria               | Postdoctoral researcher in freshwater ecology                                                  | IRSTEA                                                                                    | France                                                     |
| Ciechowska, Helena            | Geophysics in Geology                                                                          | University of Warsaw                                                                      | Poland                                                     |
| Ciftci, Ozan                  | Molecular Ecology                                                                              | Institute of Environmental Sciences                                                       | Netherlands (the)                                          |
| Cimadamore, Flavio            | PhD in biomedical biotechnologies                                                              | Vertex pharmaceuticals (most recent scientist position) - School teacher (current job)    | Italy                                                      |
| Cingay, Burcin                | Director of Science Department                                                                 | Ali Nihat Gokyigit Foundation Nezahat Gokyigit Botanic Garden                             | Turkey                                                     |
| Cinta, Claudia                | Master Science in Conservacion and environmentalbresources                                     | Private practice and research in a non profit                                             | Mexico                                                     |
| Cipriani, Florent             | Engineer, instrumentation for structural biology                                               | European Molecular Biology Laboratory                                                     | France                                                     |
| Cirulis, Aivars               | PhD student in Evolutionary Ecology                                                            | Lund University                                                                           | Sweden                                                     |

|                            |                                                                 |                                                                                                        |                                                            |
|----------------------------|-----------------------------------------------------------------|--------------------------------------------------------------------------------------------------------|------------------------------------------------------------|
| Cisek, Stevie              | Wildlife Educator                                               |                                                                                                        | United States of America (the)                             |
| Cisneros, Laura            | Assistant Extension Professor/Ecology & Environmental Education | University of Connecticut                                                                              | United States of America (the)                             |
| Cisneros-Heredia, Diego    | Professor                                                       | Universidad San Francisco de Quito USFQ                                                                | Ecuador                                                    |
| Cisse, Ramata              | Assistant Professor of Biology                                  | Georgia Gwinnett College                                                                               | United States of America (the)                             |
| Cittadino, Federica        | Senior Researcher in Environmental Law                          | Eurac Research                                                                                         | Italy                                                      |
| Civantos, Emilio           | Postdoctoral Fellow                                             | CIBIO-InBIO                                                                                            | Portugal                                                   |
| Claessens, Antoine         | Principal Investigator, Biology                                 | University of Montpellier                                                                              | France                                                     |
| Claessens, Frank           | Profesor Cell Biology                                           | KU Leuven                                                                                              | Belgium                                                    |
| Clair, Guillaume           |                                                                 | EAWAG                                                                                                  | Switzerland                                                |
| Clair, Bruno               | Directeur de recherche, Tree biomechanics and wood sciences     | CNRS                                                                                                   | France                                                     |
| Claire-Anne, BAUDIN        | Professeur théologie                                            | Facultés jésuites de Paris                                                                             | France                                                     |
| Claireau, Fabien           | Head of Research and Development, Dr. in biology conservation   | Naturalia Environnement                                                                                | France                                                     |
| Clancy, Barbara            | Neuroscience                                                    | University of Central Arkansas                                                                         | United States of America (the)                             |
| Clappe, Sylvie             | Statistical Ecology                                             | University of Lyon                                                                                     | France                                                     |
| Clarizia, Alberto          | assistant professor Physics                                     | University of Napoli "Federico II"                                                                     | Italy                                                      |
| Clark, Matthew             | Human-Environment Systems                                       | Boise State University                                                                                 | United States of America (the)                             |
| Clark, Deborah             | Plant Ecologist, Retired                                        | Oregon State University                                                                                | United States of America (the)                             |
| Clark, Liam                | Geography                                                       | University of Nottingham                                                                               | United Kingdom of Great Britain and Northern Ireland (the) |
| Clark, Chris               | Assistant Professor, Biology                                    | University of California, Riverside                                                                    | United States of America (the)                             |
| Clark, Gary                | Lecturer                                                        | La Trobe University                                                                                    | Australia                                                  |
| CLARK, MALCOLM             | ENVIRONMENTAL CHEMIST                                           | COMMONWEALTH SCIENTIFIC LTD                                                                            | Canada                                                     |
| Clarke, Anna-Belle         | Microbiology                                                    |                                                                                                        | Australia                                                  |
| Clarke, Esther             | Primatologist                                                   | MIT                                                                                                    | United States of America (the)                             |
| Clarke, Ian                | Dean, Faculty of Liberal Arts & Sciences                        | OCAD University                                                                                        | Canada                                                     |
| Clarke, Antoine            | Data Analyst                                                    | The Hospital for Sick Children                                                                         | Canada                                                     |
| Clarke, David              | Ecology                                                         | Monash University                                                                                      | Australia                                                  |
| Clarke, Michael            | Professor / Public Health                                       | Western University, London, ON. Canada                                                                 | Canada                                                     |
| Clasen-Doleviczenyi, Joerg | Doctor                                                          | Praxis                                                                                                 | Germany                                                    |
| Class, Barbara             | Post-doctoral researcher                                        | University of Turku                                                                                    | Finland                                                    |
| claude, julien             | Maître de conférences / Evolutionary Biology                    | Institut des Sciences de l'Evolution de Montpellier                                                    | France                                                     |
| Claude, Christelle         | Assistant Professor                                             | Aix-Marseille University                                                                               | France                                                     |
| Clause, Adam G.            | Postdoctoral Researcher                                         | Natural History Museum of Los Angeles County                                                           | United States of America (the)                             |
| Claussen, Julie            | Fisheries Biologist                                             | Fisheries Conservation Foundation                                                                      | United States of America (the)                             |
| Claussen, Angelika         | Medical doctor                                                  | European regional vice president of IPPNW (International Physicians for the prevention of Nuclear War) | Germany                                                    |
| Clauzon, Victor            | PhD student in hydrogeology                                     | HydroSciences Montpellier                                                                              | France                                                     |
| CLAUZON, VICTOR            | PhD                                                             | Université de Montpellier                                                                              | France                                                     |

|                             |                                                                     |                                                                   |                                                            |
|-----------------------------|---------------------------------------------------------------------|-------------------------------------------------------------------|------------------------------------------------------------|
| CLAVEL, Daniele             | chercheuse                                                          | cirad                                                             | France                                                     |
| Clavijo, Laura              | Head of botanical research                                          | Botanical Garden "Joaquin Antonio Uribe" Medellin                 | Colombia                                                   |
| Clavijo Rojas, Diana Isabel | PhD Student/ Socio-environmental Scientist                          | University of São Paulo                                           | Brazil                                                     |
| Clay, Roger                 | Professor of Physics                                                | University of Adelaide                                            | Australia                                                  |
| Clayer, Francois            | Researcher                                                          | Norwegian Institute for Water Research                            | Norway                                                     |
| Cleary, Michelle            | Associate Professor, Forest Pathologist                             | Swedish University of Agricultural Sciences                       | Sweden                                                     |
| Cleaveland, Malcolm         | Professor Emeritus of Geosciences                                   | Univ. of Arkansas-Fayetteville                                    | United States of America (the)                             |
| Clemens, Robert             | Ornithology                                                         |                                                                   | Australia                                                  |
| Clement, Charles Roland     | Senior Researcher, Historical Ecology                               | Instituto Nacional de Pesquisas da Amazonia                       | Brazil                                                     |
| Clément, Jean-Christophe    | Professor in Ecology                                                | Université Savoie Mont Blanc                                      | France                                                     |
| Clements, Jodie             | Conservationist                                                     | The Wildfowl and Wetlands Trust                                   | United Kingdom of Great Britain and Northern Ireland (the) |
| Clements, Jen               |                                                                     | University of Exeter                                              | United Kingdom of Great Britain and Northern Ireland (the) |
| Clements, Hayley            | Postdoctoral Research Fellow                                        | Centre for Complex Systems in Transition, Stellenbosch University | South Africa                                               |
| Clemson, Barry              | Organization Theory, retired                                        | Old Dominion University, Department of Engineering Management     | United States of America (the)                             |
| Clerc, Estelle              | PhD student                                                         | ETH Zurich                                                        | Switzerland                                                |
| Clerissi, Camille           | Assistant professor                                                 | Ecole Pratique des Hautes Etudes                                  | France                                                     |
| Cleveland, David A          | Research Professor, Food-Environment-Health-Equity Nexus            | U of California, Santa Barbara                                    | United States of America (the)                             |
| Clevers, Jan                | Associate Professor Remote Sensing                                  | Wageningen University                                             | Netherlands (the)                                          |
| Clewett, James              | Physicist working on power generation and motor usage efficiency.   | Hirst Magnetic Instruments Ltd/ University of Exeter              | United Kingdom of Great Britain and Northern Ireland (the) |
| Climent, José M.            | Tenured Scientist in Forest Genetics & Evolution                    | INIA, Forest research Centre                                      | Spain                                                      |
| CLINORI, SILVIA             | TRAINEE - WASTE MANAGEMENT                                          | A&T2000 S.p.A.                                                    | Italy                                                      |
| Clinton, Richard            | Professor Emeritus of Political Science                             | Oregon State University                                           | United States of America (the)                             |
| Cliquet, Robert             | emeritus professor in anthropology and sociobiology                 | Ghent University                                                  | Belgium                                                    |
| Clisby, Megan               | Veterinarian                                                        | Small animal veterinarian                                         | Australia                                                  |
| Cloern, James               | Emeritus Senior Scientist                                           | USGS                                                              | United States of America (the)                             |
| Clothier, Brent             | Scientist                                                           | New Zealand Institute for Plant & Food Research                   | New Zealand                                                |
| CLOUAIRE, Thomas            | Researcher in Molecular Biology                                     | Université Paul Sabatier- Toulouse III                            | France                                                     |
| CLOUET-D'ORVAL, Beatrice    | Director of Research                                                | CNRS                                                              | France                                                     |
| Cloutier, Louise            | Entomologist                                                        | Université de Montréal                                            | Canada                                                     |
| Cloutis, Edward             | Professor - Geology                                                 | University of Winnipeg                                            | Canada                                                     |
| Clymer, Roy                 | Medical Psychology                                                  | Deployment Health Clinical Center, WRAMC                          | United States of America (the)                             |
| Cobb, Alexander             | Principal Research Scientist, tropical peatland ecosystem processes | Singapore-MIT Alliance for Research and Technology                | Singapore                                                  |
| Cobo, Fernando              | PhD. Biology. Director of the Hydrobiological Fiel Station          | University of Santiago de Compostela                              | Spain                                                      |
| COCHARD, Hervé              | Directeur de Recherche                                              | Inra                                                              | France                                                     |

|                      |                                                                                                                          |                                                                         |                                                            |
|----------------------|--------------------------------------------------------------------------------------------------------------------------|-------------------------------------------------------------------------|------------------------------------------------------------|
| Cock, J. Mark        | Scientist                                                                                                                | Station Biologique de Roscoff                                           | France                                                     |
| Cockroft, Robert     | Ecotoxicologist                                                                                                          |                                                                         | United Kingdom of Great Britain and Northern Ireland (the) |
| Cocucci, Andrea      | Researcher at the National Research Council (CONICET) at the Universidad Nacional de Córdoba (UNC). Evolutionary Biology | Instituto Multidisciplinario de Biología Vegetal. IMBIV (CONICET-UNC)   | Argentina                                                  |
| Codeço, Claudia      | Full Researcher in Public Health                                                                                         | Oswaldo Cruz Foundation                                                 | Brazil                                                     |
| Coelho, Sara         | MS in Ecology                                                                                                            | Instituto Nacional de Pesquisas da Amazônia                             | Brazil                                                     |
| Coelho, Denis        | Associate Professor - Human Factors and Ergonomics                                                                       | School of Engineering - Jönköping University                            | Sweden                                                     |
| Coenda, Valeria      | Dr. in Astronomy                                                                                                         | Observatorio Astronómico de Córdoba - IATE (Conicet -UNC)               | Argentina                                                  |
| Coetzee, Marina      | Senior Lecturer; Soil scientist                                                                                          | Namibia University of Science & Technology                              | Namibia                                                    |
| Coetzee, Bernard     | Senior Lecturer in Ecology                                                                                               | University of Pretoria                                                  | South Africa                                               |
| Coffman, James       | Associate Professor, Biology                                                                                             | Mount Desert Island Biological Laboratory                               | United States of America (the)                             |
| Coffroth, Mary Alice | Professor - Marine Ecology                                                                                               | University at Buffalo                                                   | United States of America (the)                             |
| Cofré, Hernán        | Adjunt Professor, Science Education                                                                                      | Pontificia Universidad Católica de Valparaíso                           | Chile                                                      |
| Coggeshall, K.Mark   | Member                                                                                                                   | Oklahoma Medical Research Foundation                                    | United States of America (the)                             |
| Coghlan, Amy         | PhD Candidate                                                                                                            | Institute for Marine and Antarctic Studies                              | Australia                                                  |
| Cogné, Nathan        | Geology                                                                                                                  | Université Rennes                                                       | France                                                     |
| Cohen, Yann          | Postdoc in atmospheric chemistry                                                                                         | CNRS                                                                    | France                                                     |
| Cohen, Mike          | Ecologist                                                                                                                | CEN IEM Unit                                                            | South Africa                                               |
| Cohen, Matthew       | Assistant Professor, Sustainability Science                                                                              | Furman University                                                       | United States of America (the)                             |
| Cohen, Hamutahl      | Postdoctoral Researcher                                                                                                  | University of California, Riverside                                     | United States of America (the)                             |
| Coillot, Christophe  | Research Engineer                                                                                                        | CNRS                                                                    | France                                                     |
| Coimbra, Zulmira     | Ecology                                                                                                                  | Currently in transition                                                 | Portugal                                                   |
| Coimbra, Zulmira H.  | PhD in Ecology                                                                                                           | Universidade Federal do Rio de Janeiro                                  | Portugal                                                   |
| Coke, Maira          | Research technician                                                                                                      | INRA                                                                    | France                                                     |
| Colaço, M. Conceição | Researcher on social dimension of wildfires                                                                              | Instituto Superior de Agronomia - University of Lisbon                  | Portugal                                                   |
| Colangelo, Paolo     | Researcher                                                                                                               | National Research Council, Research Institute on Terrestrial Ecosystems | Italy                                                      |
| Colardyn, Lieven     | Sustainable Tourism Development                                                                                          | Thomas More - KULeuven                                                  | Belgium                                                    |
| Colas, François      | Oceanography                                                                                                             | IRD                                                                     | France                                                     |
| Colbert, Damon       | Research Associate                                                                                                       | Plant and Food Research                                                 | New Zealand                                                |
| Colcombet, Jean      |                                                                                                                          | INRA                                                                    | France                                                     |
| Coldsnow, Kayla      | PhD Student                                                                                                              | Rensselaer Polytechnic Institute                                        | United States of America (the)                             |
| Cole, David          | Solar-terrestrial Physics                                                                                                | Former Director National Radio and Space Weather Services               | Australia                                                  |
| Cole, Lydia          | Postdoctoral Research Fellow, Tropical Peatland Ecology and Conservation                                                 | University of St Andrews                                                | United States of America (the)                             |
| Cole, Aaron          | Senior GIS Programmer/Analyst                                                                                            | University of California, Santa Cruz                                    | United States of America (the)                             |
| Cole, Emma-Louise    | Research assistant                                                                                                       | Swansea university                                                      | United Kingdom of Great Britain and Northern Ireland (the) |

|                              |                                                                |                                                        |                                                            |
|------------------------------|----------------------------------------------------------------|--------------------------------------------------------|------------------------------------------------------------|
| Cole, Rebecca                | Science Director                                               | Osa Conservation                                       | Costa Rica                                                 |
| Cole, Christopher            | Professor Emeritus, Biology                                    | University of Minnesota, Morris                        | United States of America (the)                             |
| Cole, Nik                    | Conservation Biologist                                         | Durrell Wildlife Conservation Trust                    | Mauritius                                                  |
| Cole, Milton                 | Distinguished Professor of Physics Emeritus                    | Penn State University                                  | United States of America (the)                             |
| Cole, Simon                  | Behaviour and Education                                        | La Trobe and Aston Universities                        | Australia                                                  |
| Colefax, Andrew              | Senior Ecologist   Technologist                                | Sci-eye                                                | Australia                                                  |
| Coleman, Joanna              | Senior Lecturer, Environmental Studies                         | National University of Singapore                       | Singapore                                                  |
| Coleman, David               | Research Professor of Ecology                                  | retired                                                | United States of America (the)                             |
| Coleman, Arthur              | Aquatic biology & Entomology, Private Environmental Consultant | 1948                                                   | United States of America (the)                             |
| Coleman, Raphaël             | Field zoology / Tropical conservation biology                  | Mr                                                     | United Kingdom of Great Britain and Northern Ireland (the) |
| Coles, PhD, Jonathan Ainsley | Biophysics                                                     | University of Glasgow                                  | United Kingdom of Great Britain and Northern Ireland (the) |
| Colesie, Claudia             | Lecturer Plant eco-physiology                                  | University of Edinburgh                                | United Kingdom of Great Britain and Northern Ireland (the) |
| Colgan, Thomas               | Postdoctoral researcher                                        | University College Cork                                | Ireland                                                    |
| COLIN, Fabrice               | Vice-président of the IRD scientific council                   | IRD                                                    | France                                                     |
| colinas, carlos              | Professor of Forest Pathology                                  | University of Lleida                                   | Spain                                                      |
| Coll, Lluís                  | Associate Professor                                            | University of Lleida                                   | Spain                                                      |
| Colla, Sheila                | Assistant Professor                                            | York University, Environmental Studies                 | Canada                                                     |
| Collado Vides, Ligia         | Teaching Professor Marine Biology Phycologist                  | Florida International University                       | United States of America (the)                             |
| Collado-Vides, Ligia         | Senior Lecturer-Researcher                                     | Florida International University                       | United States of America (the)                             |
| Collalti, Alessio            | Researcher forest ecology                                      | National Research Council of Italy                     | Italy                                                      |
| Collazo, Anja Maria          | Lecturer, Environmental Sociology                              | Kyoto University                                       | Japan                                                      |
| Collet, Lila                 |                                                                | Irstea                                                 | France                                                     |
| Colleti, Carolina            | Masters degree                                                 | UNICAMP                                                | Brazil                                                     |
| Collette, Fabienne           | Researcher - Neuroscience                                      | Liege University                                       | Belgium                                                    |
| Colli-Silva, Matheus         | Master student                                                 | Institute of Biosciences, University of São Paulo      | Brazil                                                     |
| Collignon, Romain            | Ph.D Student                                                   | CNRS                                                   | France                                                     |
| Collin, Antoine              | Associate professor                                            | Ecole Pratique des Hautes Etudes, PSL Université Paris | France                                                     |
| Colling, Guy                 | Head of research unit / Population biology & evolution         | Musée national d'histoire naturelle Luxembourg         | Luxembourg                                                 |
| Collingwood, Teghan          | Research Assistant/ Ecology                                    | The University of Queensland                           | Australia                                                  |
| Collins, Katie               | Freshwater ecologist                                           | Department of Conservation                             | New Zealand                                                |
| Collins, Terrence            | Teresa Heinz Professor of Green Chemistry                      | Carnegie Mellon University                             | United States of America (the)                             |
| Collins, Scott               | Distinguished Professor                                        | University of New Mexico                               | United States of America (the)                             |
| Collins, Ben                 | Retired Science Teacher (14-18) Director Education             | DFES                                                   | United Kingdom of Great Britain and Northern Ireland (the) |
| Collison, David              | Professor Emeritus                                             | University of Dundee                                   | United Kingdom of Great Britain and Northern Ireland (the) |
| Collison, Ben                | PhD student                                                    | Dalhousie University                                   | Canada                                                     |
| Collomb, Hélène              | Optical research engineer                                      | CNRS                                                   | France                                                     |



|                               |                                                         |                                                                                    |                                |
|-------------------------------|---------------------------------------------------------|------------------------------------------------------------------------------------|--------------------------------|
| Collot, Johann                | Professor in physics                                    | University Grenoble Alpes                                                          | France                         |
| Colmenares, Pio               | Museum Specialist                                       | American Museum of Natural History                                                 | United States of America (the) |
| Colmenares, Sara              | Doctor in Ecology                                       | Pelecanus SAS                                                                      | Colombia                       |
| Colombi, Victor Hugo          | Teacher                                                 | Estado do Espírito Santo                                                           | Brazil                         |
| Colomer, Jordi                | Professor Physics                                       | University of Giorna                                                               | Spain                          |
| Colon, Diego                  | MD, General practitioner                                | Private Office                                                                     | United States of America (the) |
| Colón, Jorge                  | Professor of Chemistry                                  | University of Puerto Rico                                                          | Puerto Rico                    |
| Colosi, Joseph                | Associate Professor of Biology                          | DeSales University                                                                 | United States of America (the) |
| Colprim, Jesus                | Associate professor, Chemical engineering               | LEQUIA, University of Girona                                                       | Spain                          |
| Colunga-GarciaMarin, Patricia | Miembro Regular                                         | Academia Mexicana de Ciencias                                                      | Mexico                         |
| Comas, Joaquim                | Associate Professor / Environmental Engineering         | University of Girona                                                               | Spain                          |
| Comay, Orr                    | Postdoctoral Fellow, Ecology                            | Tel Aviv University                                                                | Israel                         |
| Combes, Magali                | Marine Ecology                                          | IFREMER                                                                            | France                         |
| Combet, Emmanuel              | Economist                                               | French Environmental and energy management Agency (ADEME)                          | France                         |
| Combosch, David               | Assistant Professor of Population Genetics              | University of Guam                                                                 | Guam                           |
| Comeau, André                 | Plant geneticist                                        | BIONOR SYSTEMIQ INC.                                                               | Canada                         |
| Comeau, Andre                 | Ph. D. (plant geneticist)                               | BIONOR SYSTEMIQ INC                                                                | Canada                         |
| Comezzi, Francesco Giovanni   | MRes (current PhD candidate) in biology                 | University of Tasmania (Australia)                                                 | Italy                          |
| Cominetti, Roberto            | Full Professor / Mathematics                            | Universidad Adolfo Ibanez                                                          | Chile                          |
| Commenges, Daniel             | Director of Research Emeritus, Biostatistics            | INSERM                                                                             | France                         |
| Comon, Pierre                 | Research director                                       | CNRS                                                                               | France                         |
| Comte, Sebastien              | Research Officer                                        | NSW Department of Industry                                                         | Australia                      |
| CONAN, Pascal                 | professor in Oceanography                               | Sorbonne Université                                                                | France                         |
| Concepción, Elena D           | Postdoctoral researcher Ecology                         | National Museum of Natural Sciences, Spanish National Research Council (MNCN-CSIC) | Spain                          |
| Condamine, Fabien             | Research scientist                                      | CNRS                                                                               | France                         |
| CONDE, CECILIA                | Researcher                                              | UNAM, Mexico                                                                       | Mexico                         |
| Conde Alvarez, Cecilia        | Researcher                                              | Instituto de Ciencias de la Atmósfera y Cambio Climático. UNAM, México             | Mexico                         |
| Conde-Porcuna, José María     | Associate Professor (Dept. of Ecology)                  | University of Granada                                                              | Spain                          |
| Condell, Kelsey               | Environmental scientist                                 |                                                                                    | United States of America (the) |
| Cone, Randall                 | Associate Professor of Mathematics and Computer Science | Salisbury                                                                          | United States of America (the) |
| Conenna, Irene                | PhD candidate, Ecology                                  | University of Helsinki                                                             | Finland                        |
| Conesa, José Javier           | Postdoctoral structural biology                         | Spanish National Center for Biotechnology                                          | Spain                          |
| Conklin, Jesse                | Post-doctoral Researcher                                | Conservation Ecology Group, University of Groningen                                | Netherlands (the)              |
| Conklin, Emily                | PhD Student, Zoology                                    | University of Hawai ‘i at Mānoa                                                    | United States of America (the) |
| Conklin, Paul                 | Environmental Science                                   | Northern Light Farm                                                                | United States of America (the) |
| Conley, Margaret              | Ph.D. Graduate Student in Physical Oceanography         | Oregon State University                                                            | United States of America (the) |
| Conlisk, Erin                 | Research Ecologist                                      | Conservation Biology Institute                                                     | United States of America (the) |

|                                  |                                                                     |                                                                       |                                                            |
|----------------------------------|---------------------------------------------------------------------|-----------------------------------------------------------------------|------------------------------------------------------------|
| Connell, Thomas                  | Research Associate in Plant Biotechnology                           | KWS SAAT                                                              | United States of America (the)                             |
| Connor, Michael                  | Molecular Biology                                                   | Retired                                                               | United States of America (the)                             |
| Connor, Rebecca                  | Applied Animal Behaviour                                            | Unitec Institute of Technology                                        | New Zealand                                                |
| Connor, Adele                    | Research Assistant                                                  | University College Dublin                                             | Ireland                                                    |
| Conole, Daniel                   | Post Doctoral Research Associate in Chemical Biology                | Imperial College London                                               | United Kingdom of Great Britain and Northern Ireland (the) |
| Conrad-Billroth, Clara           | PhD Student (Physics/Molecular Biology)                             | University of Vienna                                                  | Austria                                                    |
| Conroy, Michael                  | Wildlife Ecology and Management                                     | University of Georgia                                                 | United States of America (the)                             |
| Consoli, Gabriele                | Phd                                                                 | ETH Zurich                                                            | Switzerland                                                |
| Consoli, Fernando Luis           | Full Professor                                                      | University of Sao Paulo                                               | Brazil                                                     |
| Consorte-McCrea, Adriana         | Conservation Biology                                                | Canterbury Christ Church University                                   | United Kingdom of Great Britain and Northern Ireland (the) |
| Constantinou, Angelos            | Principal Investigator                                              | Institut of Human Genetics, CNRS, Université de Montpellier           | France                                                     |
| Conte, Andrea                    | Environmental Engineer PhD - Nature Based Solutions and Climate Art | University of Bologna and Climate Art Project                         | Italy                                                      |
| Conteddu, Kimberly               | Research Master                                                     | University College Dublin                                             | Ireland                                                    |
| Contreras, Osvaldo               | Postdoctoral Scientists                                             | Pontificia Universidad Católica de Chile                              | Chile                                                      |
| Contreras Fernández, José Miguel | Entomologist                                                        | ONG Grupo Salvaje                                                     | Chile                                                      |
| Conversi, Daniele                | Professor                                                           | University of the Basque country/IKERBASQUE foundation for science    | Spain                                                      |
| Conway, Rebecca                  | Environmental Science and Policy                                    | George Mason University                                               | United States of America (the)                             |
| Coody, Lynn                      | Principal Consultant, Organic Farming Policy Analyst                | Organic Agsystems Consulting                                          | United States of America (the)                             |
| Coogan, Sean                     | Postdoctoral Fellow                                                 | University of Alberta                                                 | Canada                                                     |
| Cook, Neil                       | Postdoc Astrophysics                                                | Universite de Montreal                                                | Canada                                                     |
| Cook, Lauren                     | Post-doctoral researcher                                            | Eawag                                                                 | Switzerland                                                |
| Cook, Simon                      | Lecturer in Physical Geography                                      | University of Dundee                                                  | United Kingdom of Great Britain and Northern Ireland (the) |
| Cook, Freeman                    | Environmental Physicist                                             | Freeman Cook & Associates                                             | New Zealand                                                |
| Cook, Jon                        | Doctor of Anthropology                                              | retired                                                               | France                                                     |
| Cook, Timothée                   | Research Associate, Ecology                                         | FitzPatrick Institute of African Ornithology, University of Cape Town | South Africa                                               |
| Cook, Joseph                     | Professor of Biology                                                | University of New Mexico                                              | United States of America (the)                             |
| Cook, James                      | Professor of Entomology                                             | Western Sydney University                                             | Australia                                                  |
| Cook, Rebecca                    | Botany and Environmental Science                                    | The University of Memphis                                             | United States of America (the)                             |
| COOK-DARZENS, Solange Cook       | Psychologist                                                        | Affiliated with Robert Debré Hospital                                 | France                                                     |
| Cooke, John                      | Emeritus Professor Environmental Biology                            | University of KwaZulu Natal                                           | South Africa                                               |
| Cooke, Charlotte                 | Marine biologist                                                    | University of portsmouth                                              | United Kingdom of Great Britain and Northern Ireland (the) |
| Cools, Jan                       | Research Coordinator Environment and Sustainable Development        | University of Antwerp                                                 | Belgium                                                    |
| Coomes, Jenny                    | PhD Student                                                         | University College Cork                                               | Ireland                                                    |

|                                    |                                                                     |                                                                                                                     |                                                            |
|------------------------------------|---------------------------------------------------------------------|---------------------------------------------------------------------------------------------------------------------|------------------------------------------------------------|
| Coop, Jonathan                     | Professor of Biology and Environment & Sustainability               | Western Colorado University                                                                                         | United States of America (the)                             |
| Cooper, Crispin                    | Theoretical Chemist                                                 |                                                                                                                     | United Kingdom of Great Britain and Northern Ireland (the) |
| Cooper, Paul David                 | A/Prof, Critical Care Medicine                                      | University of Tasmania & Royal Hobart Hospital                                                                      | Australia                                                  |
| Cooper, Rebecca                    | biophysics                                                          |                                                                                                                     | United States of America (the)                             |
| Cooper, Joshua                     | Professor, Mathematics                                              | University of South Carolina                                                                                        | United States of America (the)                             |
| Cooper, David                      | Doctor of Science, Audiology                                        |                                                                                                                     | United States of America (the)                             |
| Cooper, Arthur                     | Professor Emeritus of Forestry                                      | North Carolina State University                                                                                     | United States of America (the)                             |
| Cooper, James                      | Professor Retired/Avian Ecology                                     | University of Minnesota Twin Cities                                                                                 | United States of America (the)                             |
| Cooper, Jim                        | Professor Emeritus/Avian Ecologist                                  | University of Minnesota                                                                                             | United States of America (the)                             |
| Cooreman-Algoed, Margot            | PhD reseracher                                                      | Ghent University                                                                                                    | Belgium                                                    |
| Copley, Darren                     | Independent Researcher                                              |                                                                                                                     | Canada                                                     |
| Copley, Claudia                    | Entomologist                                                        | Royal BC Museum                                                                                                     | Canada                                                     |
| Coppens, Els                       | Senior Research Associate                                           | Ablynx, a Sanofi Company                                                                                            | Belgium                                                    |
| Coppens, Gaetane                   | Chemist, teacher in a secondary school                              | Collège Saint-Etienne                                                                                               | Belgium                                                    |
| Coquillard, Patrick                | Associate Prof. Environmental sciences                              | Université de Nice                                                                                                  | France                                                     |
| Corazza, Rosana                    | Associate Professor - Science, Technology and Environment           | Science and Technology Policy Department and Graduate Program - Geosciences Institute/ State University of Campinas | Brazil                                                     |
| Corbani, Aude                      | Ecology and environment management                                  | Ministry of agriculture                                                                                             | France                                                     |
| Corbara, Bruno                     | Maître de Conférences Ecology /Behavioral ecology                   | Université Clermont Auvergne                                                                                        | France                                                     |
| Corbett, Catherine                 | Chief Scientist                                                     | Lower Columbia Estuary Partnership                                                                                  | United States of America (the)                             |
| Corbierre, Muriel                  | Science teacher                                                     | Csc Mon Avenir                                                                                                      | Canada                                                     |
| Corbin, Emma                       | PhD Student - Cancer Research                                       | Newcastle University                                                                                                | United Kingdom of Great Britain and Northern Ireland (the) |
| Corbin, Jeffrey                    | Professor of Biological Sciences                                    | Union College                                                                                                       | United States of America (the)                             |
| Corcoran, Paul                     | Senior Lecturer/Epidemiologist                                      | University College Cork                                                                                             | Ireland                                                    |
| Corda, Gabriel                     | Scholarships PH in Philosophy                                       | CONICET                                                                                                             | Argentina                                                  |
| Cordeiro, Olga                     | Immunologist                                                        |                                                                                                                     | Portugal                                                   |
| Cordeiro, Ana                      | PhD student in Ecology                                              | Centre for Environmental and Marine Studies (CESAM), University of Lisbon                                           | Portugal                                                   |
| Cordeiro Vale Pereira, João Manuel | PhD student in Forest Ecology                                       | Albert-Ludwigs-Universität Freiburg                                                                                 | Germany                                                    |
| Cordell, Geoffrey                  | Prof Emeritus Ecopharmacognosy                                      | Natural Products Inc                                                                                                | United States of America (the)                             |
| Cordero, Gerardo Antonio           | Postdoc                                                             | University of Tuebingen                                                                                             | Germany                                                    |
| Cordero, Ernesto                   | Post-Doctoral Research Scholar Interdisciplinary/ National Director | St. Paul University/ University of Ottawa, Canadian Institute of Management                                         | Canada                                                     |
| Cordero Rivera, Adolfo             | Professor of Ecology                                                | University of Vigo                                                                                                  | Spain                                                      |
| Cordero, PhD, Prof. Ernesto        | Post-Doctoral Research Scholar Interdisciplinary/ National Director | St. Paul University/ University of Ottawa, Canadian Institute of Management                                         | Canada                                                     |
| Cordes, Andrea                     | PhD Student, Biophysical Chemistry                                  | Institute of Physical Chemistry, Georg-August-Universität Göttingen                                                 | Germany                                                    |
| Cordes, David                      | Associate Professor of Chemistry                                    | Pacific University                                                                                                  | United States of America (the)                             |

|                           |                                                       |                                                                                                 |                                                            |
|---------------------------|-------------------------------------------------------|-------------------------------------------------------------------------------------------------|------------------------------------------------------------|
| Cordova, Mario            | Climate Physics MSc                                   | Utrecht University                                                                              | Ecuador                                                    |
| Coriat, Mickael           | Astrophysicist                                        | IRAP                                                                                            | France                                                     |
| corinne, BROSSE-QUILGARS  | ingénieur                                             | IRTEA                                                                                           | France                                                     |
| Coristine, Laura          | Science Policy                                        | Environment and Climate Change Canada                                                           | Canada                                                     |
| Corkill, Matthew          | Marine and Antarctic Science                          | Institute for Marine and Antarctic Studies                                                      | Australia                                                  |
| Cormon, Xochitl           | PhD in marine ecology and fishery science             | Univeristy of Hamburg                                                                           | Germany                                                    |
| Cornejo, Flora            | Biologia                                              | ITSOEH                                                                                          | Mexico                                                     |
| Cornejo Latorre, Cristian | Biologist                                             | Universidad Autónoma del Estado de Hidalgo                                                      | Mexico                                                     |
| Cornelisse, Tara          | Senior Scientist                                      | Center for Biological Diversity                                                                 | United States of America (the)                             |
| Cornelius, Jonathan       |                                                       | World Agroforestry                                                                              | Australia                                                  |
| Cornes, Pam               | Botany compliance officer                             | University of Otago                                                                             | New Zealand                                                |
| Cornic, Gabriel           | Honorary professor. Biology                           | Université Paris Saclay, ESE institute, Orsay 91405                                             | France                                                     |
| Cornille, Amandine        | CNRS researcher                                       | CNRS                                                                                            | France                                                     |
| Cornman, Ari              | Wildlife Biologist                                    | California Fish and Game Commission                                                             | United States of America (the)                             |
| Cornu, Catherine          | Research physician                                    | Hospices Civils de Lyon                                                                         | France                                                     |
| Cornwall, Christopher     | Rutherford Discovery Fellow/marine climate change     | Victoria University of Wellington                                                               | New Zealand                                                |
| Corrado, Amanda           | POS DOC                                               | UFOP                                                                                            | Brazil                                                     |
| Corral, Teresa            | Biomedical researcher                                 | Instituto de Salud Carlos III                                                                   | Spain                                                      |
| Correa, Cristian          | Adjunct Professor, Evolutionary Ecology               | Universidad Austral de Chile                                                                    | Chile                                                      |
| Correa, Diego F.          | PhD.                                                  | The University of Queensland                                                                    | Australia                                                  |
| Corrêa, Rosângela         | Doctor in Social Anthropology, Professor              | University of Brasília                                                                          | Brazil                                                     |
| CORREA ARANGO, IVAN D     | Geologist Engineer                                    | CONSULTANT                                                                                      | Colombia                                                   |
| Corrêa da Silva, Edson    | Professor/Physicist                                   | North Fluminense State University                                                               | Brazil                                                     |
| Correia, Katie            | Marine Scientist                                      | The Central Caribbean Marine Institute                                                          | Cayman Islands (the)                                       |
| Correia, Marta            | Junior researcher Ecology                             | Centre for Functional Ecology - Science for People & the Planet (CFE)                           | Portugal                                                   |
| Correia, Barbara          | Agri-Tech Development Scientist/Applied Biology       | UWE Bristol                                                                                     | United Kingdom of Great Britain and Northern Ireland (the) |
| Corroyer-Dulmont, Simon   | Engineer                                              | Institut Pasteur                                                                                | France                                                     |
| Cortázar chinarro, Maria  | Post doc                                              | Uppsala university                                                                              | Sweden                                                     |
| Cortes, Marina            | Emmy Noether Fellow                                   | Perimeter Institute                                                                             | Canada                                                     |
| CORTES-AVIZANDA, AINARA   | POSTDOC BIODIVERSITY CONSERVATION                     | CSIC                                                                                            | Spain                                                      |
| CORTES-GOMEZ, Adriana     | Post doc fellow                                       |                                                                                                 | Mexico                                                     |
| Cortés-Ramos, Jorge       | Researcher/Climatology                                | CONACYT-Centro de Investigación Científica y de Educación Superior de Ensenada, Baja California | Mexico                                                     |
| Cortés-Rivera, Cristian   | Phd (c) in Developmental Sciences and Psychopathology | Universidad del Desarrollo                                                                      | Chile                                                      |
| Cortesi, Fabio            | UQ Development Fellow - Biology                       | The University of Queensland                                                                    | Australia                                                  |
| Corti, Paulo              | Associate Professor / Wildlife Ecology                | Universidad Austral de Chile                                                                    | Chile                                                      |
| Cortina-Segarra, Jordi    | Professor                                             | Department of Ecology-IMEM. University of Alicante                                              | Spain                                                      |
| Cortner, Owen             | Postdoctoral Associate, Environmental Policy          | Yale School of the Environment                                                                  | United States of America (the)                             |

|                          |                                                       |                                                         |                                                            |
|--------------------------|-------------------------------------------------------|---------------------------------------------------------|------------------------------------------------------------|
| Cosacov, Andrea          | Researcher, Biologist                                 | IMBIV-CONICET                                           | Argentina                                                  |
| Cosi, Filippo            | PhD student in Physics                                | Max Planck Institute for Dynamics and Self-Organization | Germany                                                    |
| Cosovic, Marija          | PhD student                                           | Forest Research Centre (CEF), University of Lisbon      | Portugal                                                   |
| Cossa, Daniel            | Biogeochemistry                                       | Université Grenoble-Alpes ISTERre                       | France                                                     |
| Costa, Tânia             | Biologist/Conservation Biology                        | University of Lisbon                                    | Portugal                                                   |
| Costa, Valentina         | Post-doc in Marine Ecology                            |                                                         | Portugal                                                   |
| Costa, Hugo              | Land cover mapping from remote sensing                | Direção-Geral do Território                             | Portugal                                                   |
| Costa, Rodrigo           | Professor                                             | Universidade Federal do Recôncavo da Bahia              | Brazil                                                     |
| Costa, Andrea            | Researcher Plasma Astrophysics                        | CONICET                                                 | Argentina                                                  |
| Costa, Luciano T         | Associate Professor / Physical Chemistry              | UNIVERSIDADE FEDERAL FLUMINENSE                         | Brazil                                                     |
| Costa, Paulo Manuel      | Professor                                             | Universidade Aberta                                     | Portugal                                                   |
| Costa, Ana               | Assistant Professor - Marine Ecology                  | University of the Azores, CIBIO-InBio                   | Portugal                                                   |
| Costa, Alexandre         | Professor                                             | State University of Ceará                               | Brazil                                                     |
| Costa Neves, Andre       | Bachelor currently doing his Master in Marine Biology | Ghent University                                        | Brazil                                                     |
| Costantino, Andrea Ivan  | PhD candidate, Cognitive Science                      | Macquarie University                                    | Australia                                                  |
| Costanza, Jennifer       |                                                       | North Carolina State University                         | United States of America (the)                             |
| Costas, Eduardo          | Professor of Genetics                                 | Veterinary Faculty. Complutense University. Madrid.     | Spain                                                      |
| Costes-Thire, Morgane    | Assistant Professor                                   |                                                         | France                                                     |
| Costille, Anne           | Research engineer in astrophysics                     | Laboratoire d astrophysique de marseille                | France                                                     |
| Cote, Julien             | Researcher                                            | CNRS                                                    | France                                                     |
| Cotrim da Cunha, Leticia | Assistant Professor - Chemical Oceanography           | Universidade do Estado do Rio de Janeiro                | Brazil                                                     |
| Cotter, Sheena           | Senior Lecturer in Ecology                            | University of Lincoln                                   | United Kingdom of Great Britain and Northern Ireland (the) |
| Cotton, Matthew          | Associate Professor of Geography and Environment      | University of York                                      | United Kingdom of Great Britain and Northern Ireland (the) |
| couchoud, isabelle       | Senior lecturer in Climatology                        | Université Savoie Mont Blanc                            | France                                                     |
| Coudel, Emilie           | Scientist in agroecology                              | CIRAD                                                   | France                                                     |
| COUDEYRE, Fabien         | IE                                                    | CNRS                                                    | France                                                     |
| Coudrain, Anne           | Directrice de Recherche honoraire                     | IRD                                                     | France                                                     |
| Coulm, Martin            | PhD Student in biology                                | 1994                                                    | France                                                     |
| Coulombe, Louis-Philippe | MSc Candidate in Astronomy and Astrophysics           | University of Montreal                                  | Canada                                                     |
| Coulombe, Gabrielle      | Research Associate, Wildlife Biology, M.S.            | University of Montana                                   | United States of America (the)                             |
| Coulon, Aurélie          | associate professor                                   | Muséum national d'Histoire naturelle                    | France                                                     |
| Coulson, Tim             | Professor of Zoology                                  | University of Oxford                                    | United Kingdom of Great Britain and Northern Ireland (the) |
| Coulthart, Michael       | Infectious disease surveillance                       | Public Health Agency of Canada                          | Canada                                                     |
| Counil, Emilie           | Researcher in Population health                       | Ined                                                    | France                                                     |
| Coupal, Louis            | Biostatistician                                       | Institut de rhumatologie de Montréal                    | Canada                                                     |
| Coupry, Damien           | Cheminformatic Scientist and AI                       | GlaxoSmithKline                                         | United Kingdom of Great Britain and Northern Ireland (the) |
| courault, dominique      | directrice de recherche                               | INRA                                                    | France                                                     |

|                          |                                                        |                                                                                                   |                                                            |
|--------------------------|--------------------------------------------------------|---------------------------------------------------------------------------------------------------|------------------------------------------------------------|
| Courcelle, Emmanuel      | Computer scientist (ingenieur)                         | C.N.R.S.                                                                                          | France                                                     |
| Courchamp, Franck        | Director of Research - Ecology, Conservation           | CNRS - University Paris Saclay                                                                    | France                                                     |
| Cournac, Laurent         | Senior Scientist, Ecophysiology                        | IRD                                                                                               | France                                                     |
| COURREGES, Cecile        | Research Engineer                                      | CNRS                                                                                              | France                                                     |
| Courtillat, Margot       | PhD student in Paleoclimatology                        | CEFREM                                                                                            | France                                                     |
| Courtin, Régis           | Astrophysicist                                         | Paris Observatory                                                                                 | France                                                     |
| Courtiol, Alexandre      | Researcher in evolution & ecology                      | Leibniz IZW                                                                                       | Germany                                                    |
| COURTOIS, Elodie         | research ingenior                                      | CNRS                                                                                              | French Guiana                                              |
| Courville, Karen         | Chief Hemodialysis Unit/Nephrologist, Researcher       | Hospital Dr. Gustavo N. Collado, Chitré/ Instituto de Ciencias Médicas Las Tablas                 | Panama                                                     |
| Coutellec, Marie-Agnès   | research scientist / ecotoxicology                     | INRA                                                                                              | France                                                     |
| COUTINHO, MIGUEL         | Environmental Applied Sciences                         | IDAD - Institute of Environment and Development                                                   | Portugal                                                   |
| Couto, Ricardo           | Post-doctoral Fellow                                   | University of Cape Town                                                                           | South Africa                                               |
| Couto Garcia, Letícia    | Professor of Restoration Ecology                       | Universidade Federal de Mato Grosso do Sul                                                        | Brazil                                                     |
| Coutu, Stephane          | Professor of Physics and of Astronomy and Astrophysics | Penn State University                                                                             | United States of America (the)                             |
| Couturier, Lydie         | Postdoc fellow                                         | Université de Bretagne Occidentale                                                                | France                                                     |
| Couvreur, Thomas         | Senior researcher, tropical biodiversity               | Institut de Recherche pour le Développement (IRD)                                                 | France                                                     |
| Couvreur, Valentin       | Post-doctoral researcher in agronomy                   | University of Louvain                                                                             | Belgium                                                    |
| Coux, Olivier            | Senior scientist; Biology                              | CNRS                                                                                              | France                                                     |
| couzin, nimbus           | Professor, PhD Physics                                 | Kankakee Community College                                                                        | United States of America (the)                             |
| Couzin, Nimbus           | Instructional Staff, Physics                           | University of Tampa                                                                               | United States of America (the)                             |
| Covarrubias, Alejandra   | Professor/Plant Biology                                | Universidad Nacional Autónoma de Mexico                                                           | Mexico                                                     |
| Covas, Rita              | Researcher in Biology                                  |                                                                                                   | Portugal                                                   |
| Cove, Michael            | Smithsonian Fellow - Conservation Biology              | Smithsonian Conservation Biology Institute                                                        | United States of America (the)                             |
| Coviella, Carlos Eduardo | Full Professor of Ecology and Researcher               | Universidad Nacional de Lujan                                                                     | Argentina                                                  |
| Cowie, Robert            | Research Professor                                     | University of Hawaii                                                                              | United States of America (the)                             |
| Cowles, David            | Professor of Biology                                   | Walla Walla University                                                                            | United States of America (the)                             |
| Cowley, Dr Kirsten       | Environmental Scientist                                | Environment, Energy and Science, Department of Planning, Industry and Environment, NSW Government | Australia                                                  |
| Cowley, Michael          | Astrophysicist                                         | Queensland University of Technology                                                               | Australia                                                  |
| Cowling, Wallace         | Professor in Plant Breeding                            | The University of Western Australia                                                               | Australia                                                  |
| Cowlishaw, Guy           | Senior Research Fellow                                 | Institute of Zoology, Zoological Society of London                                                | United Kingdom of Great Britain and Northern Ireland (the) |
| Cowlishaw, Richard       | Professor of Biology                                   | Southwestern College                                                                              | United States of America (the)                             |
| Cowton, Tom              | Lecturer in Physical Geography                         | University of St Andrews                                                                          | United Kingdom of Great Britain and Northern Ireland (the) |
| Cox, Evelyn              | Coral Reef Ecologist                                   | University of Hawaii                                                                              | United States of America (the)                             |
| Cox, Daniel              | Research fellow BioSciences                            | University of Exeter                                                                              | United Kingdom of Great Britain and Northern Ireland (the) |

|                          |                                                                       |                                                                                               |                                                            |
|--------------------------|-----------------------------------------------------------------------|-----------------------------------------------------------------------------------------------|------------------------------------------------------------|
| Coye, Camille            | British Academy Postdoctoral research fellow                          | University of Exeter                                                                          | United Kingdom of Great Britain and Northern Ireland (the) |
| Crabit, Armand           | assistant professor                                                   | Montpellier Supagro                                                                           | France                                                     |
| Craig, Nathan            | Archaeology/Anthropology                                              | New Mexico State University                                                                   | United States of America (the)                             |
| Craig, Alison            | Lecturer                                                              | Edinburgh Napier University                                                                   | United Kingdom of Great Britain and Northern Ireland (the) |
| Craig, Michael           | Research Fellow                                                       | University of Western Australia                                                               | Australia                                                  |
| Craig, Peter             | Ecologist                                                             | retired                                                                                       | United States of America (the)                             |
| Craig, Jack              | Professor of Reserach                                                 | Temple University                                                                             | United States of America (the)                             |
| Craighead, Frank (Lance) | Executive Director                                                    | Craighead Institute                                                                           | United States of America (the)                             |
| Crain, Sheila            | qNMR Technical Officer                                                | National Research Council                                                                     | Canada                                                     |
| Cramer, Michael          | Plant ecophysiology                                                   | University of Cape Town                                                                       | South Africa                                               |
| Cramer, Wolfgang         | Senior scientist, climate, biodiversity, sustainable development      | CNRS / IMBE                                                                                   | France                                                     |
| Crane, Rebecca           | Reader in Psychology                                                  | Bangor University                                                                             | United Kingdom of Great Britain and Northern Ireland (the) |
| Crane, Clare             | Biodiversity Research Officer                                         | Australian National University                                                                | Australia                                                  |
| Crane, Rich              | Lecturer in Sustainable Mining                                        | University of Exeter                                                                          | United Kingdom of Great Britain and Northern Ireland (the) |
| Cranston, James          | PhD Student, Macroecology                                             | University of Exeter                                                                          | United Kingdom of Great Britain and Northern Ireland (the) |
| Crave, Alain             | researcher                                                            | CNRS                                                                                          | France                                                     |
| Crawford, Tim            | Postdoctoral Research Fellow                                          | University of Potsdam                                                                         | Germany                                                    |
| Crawford, Ngel           | Emeritus Professor of Biological Sciences                             | UC San Diego                                                                                  | United States of America (the)                             |
| Crayn, Darren            | Professor and Director, Australian Tropical Herbarium - plant science | James Cook University                                                                         | Australia                                                  |
| CREAC'H, Layla           | PhD student                                                           | Institute for Marine and Antarctic Studies                                                    | Australia                                                  |
| Creary Ford, Marcia      | Environmental Data Manager/Marine Biologist                           | Caribbean Coastal Data Centre, UWI-Centre for Marine Sciences                                 | Jamaica                                                    |
| Creasey, Matthew         | Ecologist                                                             |                                                                                               | United Kingdom of Great Britain and Northern Ireland (the) |
| Cree, Alison             | Professor, Zoology                                                    | University of Otago                                                                           | New Zealand                                                |
| Creed, Irena             | Associate VP Research, Dept. of Biology                               | University of Saskatchewan                                                                    | Canada                                                     |
| Crego, Ramiro            | Postdoctoral Researcher                                               | Smithsonian Conservation Biology Institute                                                    | Argentina                                                  |
| Cremoux, Sylvain         | Associates Professor                                                  | Centre de recherche cerveau et cognition, UMR 5549, CNRS, université Paul Sabatier Toulouse 3 | France                                                     |
| Crepaz, Harald           | PhD Researcher                                                        | Eurac Research                                                                                | Italy                                                      |
| Cresciense, Lecaude      | Biostatistician et Bioinformatician in microbiology                   | Ceraq                                                                                         | France                                                     |
| crespin, silvio javier   | Post Doctoral researcher                                              | Facultad de Ciencias Forestales, Universidad de Concepcion, Chile                             | Chile                                                      |
| Crespo, Enrique          | Professor of Ecology, University of Patagonia                         | Senior Researcher CONICET                                                                     | Argentina                                                  |
| Crespo, Daniel           | Researcher                                                            | MARE-IPLeiria                                                                                 | Portugal                                                   |

|                            |                                                                       |                                                                                                                                     |                                                            |
|----------------------------|-----------------------------------------------------------------------|-------------------------------------------------------------------------------------------------------------------------------------|------------------------------------------------------------|
| Crespo, Julio E.           | Associate Professor in Natural Sciences and Sustainability            | Universidad de Los Lagos, Osorno Campus                                                                                             | Chile                                                      |
| Crespo Neto, Osman         | Master student Marine Biological Resources                            | IMBRSea                                                                                                                             | Brazil                                                     |
| Cresswell, Richard         | Hydrogeologist                                                        |                                                                                                                                     | Australia                                                  |
| Crete, Elena               | Manager                                                               | Sustainable Development Solutions Network (SDSN)                                                                                    | United States of America (the)                             |
| Creuzburg, Martin          | Professor of Physics                                                  | University of Regensburg                                                                                                            | Germany                                                    |
| Crevecœur, Isabelle        | Researcher - paleanthropology                                         | CNRS                                                                                                                                | France                                                     |
| Crevecœur, Sophie          | Research Scientist                                                    | Environment and Climate Change Canada                                                                                               | Canada                                                     |
| Cribb, Thomas              | Associate Professor Parasitology                                      | The University of Queensland                                                                                                        | Australia                                                  |
| Cripps, Oliver             | Sustainability Manager                                                | Herman Miller                                                                                                                       | United Kingdom of Great Britain and Northern Ireland (the) |
| Criscuolo, Francois        | Director of Research in evolutionary biology, CNRS                    | IPH, Department of Ecology, Physiology, Ethology                                                                                    | France                                                     |
| Crist, Eileen              | Science & Technology Studies / Environmental Studies                  | Virginia Tech                                                                                                                       | United States of America (the)                             |
| Cristi, Antonia            | Microbial Ecology                                                     | GEMA Center for Genomics, Ecology and Environment Universidad Mayor                                                                 | Chile                                                      |
| Crnobrnja-Isailovic, Jelka | Professor of Evolutionary and Conservation Biology                    | Faculty of Sciences and Mathematics University of Nis & Institute for Biological Research "Sinisa Stankovic" University of Belgrade | Serbia                                                     |
| Croijmans, Luuk            | PhD candidate in Ecological Agriculture and Insect-Plant Interactions | Wageningen University                                                                                                               | Netherlands (the)                                          |
| Croizier, Sophie           |                                                                       | University of Lausanne                                                                                                              | Switzerland                                                |
| Croll, Stuart              | Professor (emeritus), Coatings and Polymeric Materials                | North Dakota State University                                                                                                       | United States of America (the)                             |
| Crompton, Jeff             | PhD Candidate in Glaciology                                           | Simon Fraser University                                                                                                             | Canada                                                     |
| Cronemberger, Cecilia      | Phd student - Environmental Science                                   | Universidade do Estado do Rio de Janeiro                                                                                            | Brazil                                                     |
| Crook, Julia               | Research Fellow in Atmospheric Science                                | University Of Leeds                                                                                                                 | United Kingdom of Great Britain and Northern Ireland (the) |
| Crookall, David            | prof & ed, climate change & participatory simulation                  | UCA                                                                                                                                 | France                                                     |
| Cross, Ian                 | Professor                                                             | University of Cambridge                                                                                                             | United Kingdom of Great Britain and Northern Ireland (the) |
| Cross, Regan               | PhD Student, Biology                                                  | Queen's University                                                                                                                  | Canada                                                     |
| Cross, Adam                | Research Fellow/Ecology                                               | Curtin University                                                                                                                   | Australia                                                  |
| Cross, Sophie              | Researcher, restoration ecology                                       | Curtin University                                                                                                                   | Australia                                                  |
| Crossan, A. Brook          | Ph.D. Geophysical Fluid Dynamics                                      | New Jersey Institute of Technology                                                                                                  | United States of America (the)                             |
| Crossley, Dac              | soil vecology                                                         | Georgia Museum of Natural History                                                                                                   | United States of America (the)                             |
| Crother, Brian             | Professor of Biology                                                  | 1956                                                                                                                                | United States of America (the)                             |
| Crottini, Angelica         | Researcher                                                            | Cibio, Universidade do Porto                                                                                                        | Portugal                                                   |
| Crouthamel, D.Sc., Richard | Executive Director                                                    | International Environmental Data Rescue Organization                                                                                | United States of America (the)                             |
| Crouzat, Emilie            | Researcher - Mountain social-ecological systems                       | Irstea                                                                                                                              | France                                                     |
| Crowley, Liam              | Post-graduate researcher                                              | University of Birmingham                                                                                                            | United Kingdom of Great Britain and Northern Ireland (the) |



|                                |                                                                        |                                                                                                                   |                                                            |
|--------------------------------|------------------------------------------------------------------------|-------------------------------------------------------------------------------------------------------------------|------------------------------------------------------------|
| Crowley, Dr Dominic            | Material Sciences                                                      | University of Brighton                                                                                            | United Kingdom of Great Britain and Northern Ireland (the) |
| Crozat, Estelle                | Lecturer in Genetics                                                   | Université Paul Sabatier, Toulouse                                                                                | France                                                     |
| Cruickshank, Sam               | Postdoctoral researcher in Ecology                                     | Swiss Federal Research Institute WSL                                                                              | Switzerland                                                |
| Crumley, Carole                | Professor emerita, Anthropology                                        | University of North Carolina, Chapel Hill                                                                         | United States of America (the)                             |
| Crusellas, M Àngels            | Physics teacher                                                        | Universitat de Vic - Universitat Central de Catalunya                                                             | Spain                                                      |
| Crusius, Christina             | Atmospheric Scientist                                                  |                                                                                                                   | United States of America (the)                             |
| Crusius, John                  | Chemical oceanographer                                                 | Federal scientist signing as an individual                                                                        | United States of America (the)                             |
| Cruywagen, Elsie               | Plant pathologist                                                      | Agricultural Research Council                                                                                     | South Africa                                               |
| Cruz, Sebastian                | PhD. Ecology                                                           |                                                                                                                   | Ecuador                                                    |
| Cruz, Audrey Jean              | Designer /Scientist                                                    | SQUARE DIMENSION CONSTRUCTION COMPANY LTD                                                                         | Philippines (the)                                          |
| Cruz, Monica                   | Researcher, Psychologist, Specialist in Public Policy & Gender Justice | -                                                                                                                 | Costa Rica                                                 |
| Cruz, Rafael                   | Professor Associado                                                    | Federal University of Pampa                                                                                       | Brazil                                                     |
| Cruz de Carvalho, Maria Helena | Associate Professor                                                    | UPEC/IBENS                                                                                                        | France                                                     |
| Cruz-Barraza, Jose Antonio     | Titular Researcher                                                     | Universidad Nacional Autonoma de Mexico, Instituto de Ciencias del Mar y Limnologia, Unidad Academica de Mazatlan | Mexico                                                     |
| Cruz-Neto, Oswaldo             | Post doc                                                               | Univerdisade Federal de Pernambuco                                                                                | Brazil                                                     |
| Cruz-Vorbröcker, Yorcelis      | Senior Researcher                                                      | FiBS - Research Institute Berlin                                                                                  | Germany                                                    |
| Cryan, Jason                   | Deputy Director and Chief, Research & Collections                      | North Carolina Museum of Natural Sciences                                                                         | United States of America (the)                             |
| Csbasés, M.Àngels              | Professor or Applied Economics                                         | Universitat of Lleida                                                                                             | Spain                                                      |
| Cseh, András                   | Molecular geneticist                                                   |                                                                                                                   | Hungary                                                    |
| Csergo, Anna Maria             | Associate Professor                                                    | Szent Istvan University                                                                                           | Hungary                                                    |
| Csernetics, Arpad              | postdoctoral researcher, Biology                                       | Biological Research Centre, Szeged                                                                                | Hungary                                                    |
| Csilléry, Katalin              | Research Fellow                                                        | Department of Evolutionary Biology and Environmental Studies, University of Zurich                                | Switzerland                                                |
| Csukás, Domokos                | Assistant lecturer, Veterinarian, Lab Animal Specialist                | Department of Surgical Research and Techniques Semmelweis University Budapest                                     | Hungary                                                    |
| Csuzdi, Csaba                  | Professor of Zoology                                                   | Eszterházy Károly University                                                                                      | Hungary                                                    |
| cubaynes, sarah                | lecturer                                                               | école pratique des hautes etudes                                                                                  | France                                                     |
| Cubaynes, Sarah                | associate professor                                                    | Ecole Pratique des Hautes Etudes                                                                                  | France                                                     |
| Cucchi, Michel                 | Medicine                                                               | Centre Virchow-Villermé, Paris                                                                                    | France                                                     |
| Cucchiaro, Sara                | PostDoc in Geomorphology                                               | University of Padova                                                                                              | Italy                                                      |
| Cucknell, Anna                 | Estuaries and Wetlands Project Manager                                 | Zoological Society of London                                                                                      | United Kingdom of Great Britain and Northern Ireland (the) |
| Cudennec, Christophe           | Professor                                                              | Agrocampus Ouest, UMR SAS                                                                                         | France                                                     |
| Cudlin, Pavel                  | Head of Department, ecologist                                          | Global Change Research Institute, Czech Academy of Sciences                                                       | Czech Republic (the)                                       |
| Cudmore, Wynn                  | Life Science Instructor                                                | Chemeketa Community College                                                                                       | United States of America (the)                             |
| Cudok, Falk                    | researcher; buildings                                                  | TU Berlin                                                                                                         | Germany                                                    |

|                           |                                                                 |                                                                    |                                                            |
|---------------------------|-----------------------------------------------------------------|--------------------------------------------------------------------|------------------------------------------------------------|
| Cuellar, Sabrina          | Student Researcher                                              | University of Auckland/Plant and Food research/Eurofins            | New Zealand                                                |
| Cuervo, José Javier       | Senior Scientist in Evolutionary Ecology                        | National Museum of Natural Sciences (MNCN-CSIC)                    | Spain                                                      |
| Cuesta, Miriam            | Master student                                                  | IMAR                                                               | Portugal                                                   |
| Cuevas, Elfego            | PhD candidate in Conservation Medicine                          | University Andres Bello                                            | Chile                                                      |
| Cuevas Juárez, Esmeralda  | PhD student                                                     | Instituto de Biotecnología UNAM                                    | Mexico                                                     |
| Cui, Zhiqiang             | Research Scientist                                              | University of Leeds                                                | United Kingdom of Great Britain and Northern Ireland (the) |
| Cullen, Ross              | Emeritus Professor of Resource Economics                        | Lincoln University                                                 | New Zealand                                                |
| Cumming, Brian            | Professor and Head                                              | Queen's University, Dept. Biology                                  | Canada                                                     |
| Cummings, William         | Ecologist                                                       | Center for Regional Alternatives                                   | United States of America (the)                             |
| Cundliffe, Viva           | PhD abd                                                         | GC Green Carbon Inc                                                | Canada                                                     |
| Cunha, Catarina           | Biologist/Veterinary Doctor                                     |                                                                    | Portugal                                                   |
| Cunha, Eduardo            | Postdoctoral Research Associate / Wildlife and Fisheries        | Texas A&M University                                               | United States of America (the)                             |
| Cunill, Laia              | Engineer                                                        | Ciclica                                                            | Spain                                                      |
| Cunillera-Montcusí, David | PhD Student                                                     | Universitat de Girona                                              | Spain                                                      |
| Cunningham, Duncan        | Retired science officer                                         | Department of Conservation                                         | New Zealand                                                |
| Cunningham, Andrew        | Professor of Wildlife Epidemiology & Deputy Director of Science | Zoological Society of London                                       | United Kingdom of Great Britain and Northern Ireland (the) |
| Cunningham, Mary Ann      | Professor of Geography                                          | Vassar College                                                     | United States of America (the)                             |
| Cunningham, Calum         |                                                                 | University of Tasmania                                             | Australia                                                  |
| Cunningham, Colette       | Lecturer Global Public Health                                   | University College Cork School of Public Health                    | Ireland                                                    |
| Cuny, Philippe            | Professor - Microbial marine ecology                            | Aix-Marseille University - Mediterranean Institute of Oceanography | France                                                     |
| Cupillard, Christophe     | Archaeologist                                                   | Ministère de la Culture                                            | France                                                     |
| Cupul, Fabio              |                                                                 | Universidad de Guadalajara                                         | Mexico                                                     |
| Curaqueo, Gustavo         | Assistan Professor                                              | Universidad Católica de Temuco                                     | Chile                                                      |
| Curcija, Charlie          | Scientist, Building Facades                                     | LBNL                                                               | United States of America (the)                             |
| Cure, Marcio              | PhD student/ecology                                             | Universidade Federal de Santa Catarina                             | Brazil                                                     |
| Curien, Dominique         | Senior scientist in Nuclear Physics                             | IN2P3/CNRS                                                         | France                                                     |
| Curin, Sandra             | PhD Student                                                     | csiro                                                              | Australia                                                  |
| Curnier, Daniel           | Environmental Science                                           | Institute of Geography and Sustainability, University of Lausanne  | Switzerland                                                |
| Currey, Mark              | Senior Research Assistant 1                                     | University of Oregon                                               | United States of America (the)                             |
| Currie, Jock              | Postdoctoral Fellow                                             | Nelson Mandela University                                          | South Africa                                               |
| Currier, Kitty            | Geographer                                                      |                                                                    | United States of America (the)                             |
| Curry, Chris              | emeritus consultant                                             | Fiona Stanley Hospital. Murdoch University                         | Australia                                                  |
| Cursach, Jaime            | Marine biology                                                  | Fundación Conservación Marina                                      | Chile                                                      |
| Curtis, Barbara           | Environmental consultant / ecologist                            | Curtis Consulting - private                                        | Namibia                                                    |
| Curtiss, Owen             | Electrical Engineer                                             | TKDA                                                               | United States of America (the)                             |

|                          |                                                  |                                                                                         |                                                            |
|--------------------------|--------------------------------------------------|-----------------------------------------------------------------------------------------|------------------------------------------------------------|
| Curtius, Joachim         | Professor / Atmospheric Science                  | Institute for Atmospheric and Environmental Sciences, Goethe University Frankfurt a. M. | Germany                                                    |
| Cury, Jean               | Post Doc                                         | LRI - Univ. Paris Saclay                                                                | France                                                     |
| Cussac, Daniel           | Professor of Human Physiology                    | Faculty of Pharmaceutical Sciences & INSERM I2MC U1048 laboratory , Toulouse            | France                                                     |
| Custer, Brian            | Developer                                        | AuroraView LLC                                                                          | United States of America (the)                             |
| Custódio, Marco          | PhD candidate                                    | University of Aveiro                                                                    | Portugal                                                   |
| Cutajar, Simone          | Director                                         | Green House                                                                             | Malta                                                      |
| Cutajar, Anthony         | PhD Student                                      | Aston University                                                                        | United Kingdom of Great Britain and Northern Ireland (the) |
| Cvijetic, Slaven         | MSc Neuroscience                                 | ETHZ                                                                                    | Switzerland                                                |
| Cyle, Taylor             | Soil Biogeochemist - PhD Candidate               | Cornell University                                                                      | United States of America (the)                             |
| Czachorowski, Stanisław  | associate professor, biology                     | University of Warmia and Mazury in Olsztyn                                              | Poland                                                     |
| Czajkowski, Jorge Daniel | Director                                         | LAyHS - FAU - UNLP // CIC // CONICET                                                    | Argentina                                                  |
| Czarnoleski, Marcin      | associate professor                              | Jagiellonian University                                                                 | Poland                                                     |
| CZERWIEC, Quentin        | PhD Student /Biotechnology                       | INRA                                                                                    | France                                                     |
| Czirják, Gábor Árpád     | Scientist                                        | Leibniz Institute for Zoo and Wildlife Research                                         | Germany                                                    |
| Czisch, Michael          | Head of Neuroimaging                             | Max Planck Institute of Psychiatry                                                      | Germany                                                    |
| Czúcz, Bálint            |                                                  | European Commission, Joint Research Centre                                              | Italy                                                      |
| Czyż, Beata              | ecologist, ornithologist                         | University of Wroclaw                                                                   | Poland                                                     |
| D. Ritter, Camila        | Biologist                                        | University of Duisburg-Essen                                                            | Germany                                                    |
| D'Agata, Federico        | Applied Physics                                  | University of Turin                                                                     | Italy                                                      |
| D'Alba, Liliana          | Evolutionary Biologist                           | Universiteit Gent                                                                       | Belgium                                                    |
| D'Alelio, Domenico       | Researcher, Marine Ecology                       | Stazione Zoologica Anton Dohrn Napoli                                                   | Italy                                                      |
| D'Amelio, Pietro Bruno   | Post Doc in Ornithology                          | FitzPatrick Institute of African Ornithology                                            | South Africa                                               |
| D'Amico, Frank           | Senior Lecturer                                  | UPPA                                                                                    | France                                                     |
| D'Amico, Marcello        | Postdoctoral researcher                          | CIBIO-InBIO (University of Porto) & CEABN-InBIO (University of Lisbon)                  | Portugal                                                   |
| D'Août, Kristiaan        | Biologist - Senior Lecturer in Biomechanics      | University of Liverpool                                                                 | United Kingdom of Great Britain and Northern Ireland (the) |
| D'Bastiani, Elvira       | PhD Student in Ecology and Conservation          | Universidade Federal do Paraná                                                          | Brazil                                                     |
| D'Elia, Guillermo        | Profesor                                         | Universidad Austral de Chile                                                            | Chile                                                      |
| da Conceição, Isabel     | Assistant Professor                              | University of Coimbra                                                                   | Portugal                                                   |
| da Costa, Francisco      | Professor of Mathematics, Statistics and Physics | Federal University of Rio Grande do Norte                                               | Brazil                                                     |
| da Costa, Luis           | researcher                                       | Royal Museum for Central Africa                                                         | Belgium                                                    |
| da Costa Araujo, Juliana | PhD                                              | Max Planck Institute of Animal Behavior                                                 | Germany                                                    |
| da Cruz, Aparecido       | Professor em Proteção Humana                     | Sociedade Brasileira de Proteção Humana SOBGRAPH                                        | Brazil                                                     |
| Da Cunha, Dênis Antônio  | Associate Professor                              | Universidade Federal de Viçosa                                                          | Brazil                                                     |
| Da Lage, Jean-Luc        | Researcher in Evolutionary biology               | CNRS                                                                                    | France                                                     |
| da Luz, Guilherme        | Master's student (Regional Development)          | Universidade Regional de Blumenau (FURB)                                                | Brazil                                                     |
| Da Mosto, Jane           | Executive Director                               | We are here Venice                                                                      | Italy                                                      |
| da Silva, Dakir Larara   | Professor/Geógrafo e Climatologista              | UFRGS - Universidade Federal do Rio Grande do Sul                                       | Brazil                                                     |

|                                  |                                                                           |                                                                              |                                |
|----------------------------------|---------------------------------------------------------------------------|------------------------------------------------------------------------------|--------------------------------|
| da Silva, Emilin Joma            | PHD Student                                                               | University Hamburg                                                           | Germany                        |
| da Silva, Eduardo                | Head professor                                                            | Federal University of Bahia                                                  | Brazil                         |
| da Silva, Istéfani Luciene Dayse | Adjunct Professor                                                         | Federal University of West of Bahia                                          | Brazil                         |
| da Silva Lima, Ligia             | PhD researcher                                                            | Ghent University                                                             | Belgium                        |
| Dabdab, Roberta                  | researcher at Centro Interdisciplinar de Semiótica da Cultura e da Mídia. | Pontificie Universidade Católica de São Paulo                                | Brazil                         |
| Dablander, Fabian                | PhD Candidate in Psychological Methods                                    | University of Amsterdam                                                      | Netherlands (the)              |
| Dacey, Christopher               | Senior Environmental Scientist                                            | Hydroture                                                                    | United States of America (the) |
| Daco, Laura                      | Researcher                                                                | National museum of natural history Luxembourg                                | Luxembourg                     |
| Dacre, Ian                       | Regional Animal Health Emergency Officer / veterinary medicine            | Food and Agriculture Organisation of the United Nations                      | Thailand                       |
| Daffner, Michaela                | Dr.med.                                                                   | General Practitioner                                                         | Germany                        |
| Dafis, Stavros                   | Physicist - Atmospheric Sciences and Environment M.Sc., PhD student       | National Observatory of Athens                                               | Greece                         |
| Dagosta, Fernando C. P.          | Associate Professor                                                       | Universidade Federal da Grande Dourados                                      | Brazil                         |
| Dagosta, Fernando                | Associate Professor                                                       | UFGD - Universidade Federal da Grande Dourados                               | Brazil                         |
| Dagreou, Sylvie                  | Assistant professor, Physics                                              | Université de Pau et des Pays de l'Adour                                     | France                         |
| Dahal, Karna                     | Post Doctoral Researcher                                                  | Chalmers University of Technology                                            | Sweden                         |
| Dahanukar, Neelesh               | Assistant Professor                                                       | Shiv Nadar Institution of Eminence, Delhi-NCR                                | India                          |
| DAHDOUH-GUEBAS, Farid            | Professor on Mangrove Social-Ecological Systems                           | Université Libre de Bruxelles - ULB                                          | Belgium                        |
| Dahl, Arthur                     | President, Biologist                                                      | International Environment Forum                                              | Switzerland                    |
| Dahlgren, Thomas                 | Scientist (PhD Marine Biology)                                            | NORCE Norwegian Research Centre                                              | Norway                         |
| Dahlgren, Thomas G.              | Research Professor                                                        | NORCE Climate and Environment                                                | Norway                         |
| Dahm, Daniel                     | Executive Director, Senior Advisor, Member                                | United Sustainability, World Future Council, Federation of German Scientists | Germany                        |
| Dai, Boyi                        | Associate Professor                                                       | University of Wyoming                                                        | United States of America (the) |
| Dai, Wen                         | Geography                                                                 | University of Lausanne                                                       | Switzerland                    |
| Dailly, Helene                   | Scientific staff                                                          | UCLouvain                                                                    | Belgium                        |
| Dainese, Matteo                  | Senior Researcher                                                         | Eurac Research                                                               | Italy                          |
| Dajdok, Zygmunt                  | Biological sciences                                                       | University of Wroclaw                                                        | Poland                         |
| Dal Co, Alma                     | physicist                                                                 | ETH ZURICH                                                                   | Switzerland                    |
| Dala-Corte, Renato               | Postdoctoral researcher / Freshwater ecology                              | Universidade Federal de Goiás                                                | Brazil                         |
| Dalago Salgado, Lilian           | PhD - Ecology and Conservation                                            |                                                                              | Brazil                         |
| Dalbelo, Thalita                 | Coordinaytor of Unicamp Masterplan                                        | Unicamp                                                                      | Brazil                         |
| Daley, Cynthia                   | Director for the Center for Regenerative Agriculture & Resilient Systems  | California State University Chico                                            | United States of America (the) |
| Dalfo, Cristina                  | Professor                                                                 | Universitat de Lleida                                                        | Spain                          |
| Dalitz, Helmut                   | Academic director, Botanical Garden                                       | Hohenheim Gardens, University of Hohenheim, Stuttgart                        | Germany                        |
| Dallapiccola, Mattia             | Researcher                                                                | Eurac Research                                                               | Italy                          |
| Dalle Fratte, Michele            | post-doc                                                                  | Università of Insubria                                                       | Italy                          |
| Dallmeier, Francisco             | Director Center for Conservation and Sustainability                       | Smithsonian Conservation Biology Institute                                   | United States of America (the) |

|                                  |                                                                              |                                                                                    |                                |
|----------------------------------|------------------------------------------------------------------------------|------------------------------------------------------------------------------------|--------------------------------|
| Dalrymple, G Brent               | Professor & Dean Emeritus, College of Earth, Oceanic, & Atmospheric Sciences | Oregon State University                                                            | United States of America (the) |
| Daly, Martin                     | Lecturer in Psychology                                                       | Western Sydney University                                                          | Australia                      |
| Daly, Timothy                    | Computer Science                                                             | Carnegie Mellon University                                                         | United States of America (the) |
| Dalziell, Emma                   | Postdoc/Plant Conservation                                                   |                                                                                    | Australia                      |
| Dami, Laura                      | Project leader                                                               | Tour du Valat                                                                      | France                         |
| Damiani, Giada                   | Specialist in Biophysical Head Modelling - tCS                               | Neuroelectrics                                                                     | Spain                          |
| Damiano, Baldan                  | post-doc                                                                     | National Institute of oceanography and Applied Geophysics (OGS), Trieste           | Italy                          |
| Damour, Gaëlle                   | Researcher in Agroecolgy                                                     | CIRAD                                                                              | France                         |
| Damus, Martin                    | Plant health risk assessor                                                   | Canadian Food Inspection Agency                                                    | Canada                         |
| DANEL, christine                 | Physician                                                                    | Hopital Bichat Paris                                                               | France                         |
| Danese, Alberto                  | PhD in Electrical Engineering                                                | UPC - Universitat Politecnica de Catalunya                                         | Spain                          |
| D'Angelo, Giulia                 | PhD student in animal biology, natural history of urban birds                | State University of Campinas                                                       | Brazil                         |
| Daniel, Francois-Joseph          | Sociology                                                                    | National School for Water and Environmental Engineering - University of Strasbourg | France                         |
| Daniel, Gabriela                 | Biology                                                                      | Unesp                                                                              | Brazil                         |
| DANIEL, Warren                   | PhD Student                                                                  | antwerpen Universiteit                                                             | Belgium                        |
| Danielle, ALLOIN                 | Astrophysics, Directrice de Recherches émérite au CNRS                       | CNRS                                                                               | France                         |
| Danielsen, Johannis              | Head of the Seabird Ecology Deparment                                        | Faroese Marine Research Institute                                                  | Faroe Islands (the)            |
| Danielsson Villegas, Luis Miguel | Research Student                                                             | IMDEA Software Institute                                                           | Spain                          |
| Danilo, Laure                    | Paleontologist, museum curator                                               | Muséum d'Orléans pour la Biodiversité et l'Environnement                           | France                         |
| Danion, Frederic                 | Researcher in Neurosciences                                                  | CNRS                                                                               | France                         |
| Danjon, Frédéric                 | Senior scientist                                                             | INRA                                                                               | France                         |
| Danker, Timm                     | Group Leader Electrophysiology                                               | NMI natural and medical sciences institute, Tübingen                               | Germany                        |
| Danks, Cecilia                   | Associate Professor                                                          | University of Vermont                                                              | United States of America (the) |
| Danovaro, Roberto                | Prof.                                                                        | Stazione Zoologica Anton Dohrn                                                     | Italy                          |
| Danowski, Barbara                | Professor of Biological Sciences                                             | Union College                                                                      | United States of America (the) |
| Danquigny, Charles               | Associate Professor                                                          | Avignon Université                                                                 | France                         |
| Dansereau, Véronique             | Post. Doc. researcher in glaciology and geophysics                           | Laboratoire 3SR (CNRS)                                                             | France                         |
| Dantas, Sidnei                   | BIOLOGY                                                                      | Cristalino Lodge                                                                   | Brazil                         |
| Danthu, Pascal                   | Plant ecologist                                                              | CIRAD                                                                              | France                         |
| Dao, Thai                        | Plant Biology                                                                | University of California, Berkeley                                                 | Viet Nam                       |
| Daouk, Silwan                    | PhD in Environmental Geochemistry                                            | Eawag                                                                              | Switzerland                    |
| Dapkey, Tanya                    | Entomologist                                                                 | Academy of Natural Sciences                                                        | United States of America (the) |
| Dar, Javid                       | Assistant Professor, Environmental Science                                   | SRM University, Andhra Pradesh                                                     | India                          |
| Darbi, Marianne                  | Biodiversity Researcher                                                      | Helmholtz Centre for Environmental Research - UFZ                                  | Germany                        |
| Darboux, Frédéric                | Environment scientist                                                        | INRA                                                                               | France                         |

|                      |                                                                                         |                                                                       |                                                            |
|----------------------|-----------------------------------------------------------------------------------------|-----------------------------------------------------------------------|------------------------------------------------------------|
| Darcy, Laura         | Conservationist                                                                         | Zoological Society of London/Borneo Nature Foundation                 | United Kingdom of Great Britain and Northern Ireland (the) |
| Darimont, Chris      | Associate Professor                                                                     | University of Victoria                                                | Canada                                                     |
| Darr, Pratima        | Assistant Professor of Biology (I also teach environmental science)                     | Georgia Gwinnett College                                              | United States of America (the)                             |
| Darszon, Alberto     | Professor                                                                               | Universidad Nacional Autónoma de México                               | Mexico                                                     |
| Das, Sudip           | Scientist in Microbiology                                                               | University of Lausanne                                                | Switzerland                                                |
| Das, Gaurav          | Scientist, Neurobiology                                                                 | National Centre for Cell Science                                      | India                                                      |
| Das, Dhritiman       | Field Scientist                                                                         | Pygmy Hog Conservation Programme, Durrell Wildlife Conservation Trust | India                                                      |
| Das, Anutosh         | Assistant Professor,Urban Planning                                                      | Rajshahi University of Engineering & Technology (RUET)                | Bangladesh                                                 |
| Das, Rocktim Ramen   | PhD Candidate                                                                           | University of the Ryukyus                                             | Japan                                                      |
| Das, Anirban         | Student                                                                                 | LPU                                                                   | India                                                      |
| das Neves, Susana    | Technical assistant - Entomology                                                        | Stellenbosch University                                               | South Africa                                               |
| Datovo, Alessio      | Assistant Professor, Curator of Fishes                                                  | Museu de Zoologia, Universidade de Sao Paulo                          | Brazil                                                     |
| Datta, Debajit       | Assistant Professor of Geography                                                        | Jadavpur University                                                   | India                                                      |
| Dau, Holger          | professor, physics                                                                      | Freie Univ. Berlin                                                    | Germany                                                    |
| Daudin, Kevin        | Earth and social sciences                                                               | University of Montpellier                                             | France                                                     |
| Daumer, Volker       | Physicist                                                                               | Fraunhofer IAF                                                        | Germany                                                    |
| Dautermann, Oliver   | Postdoctoral Fellow                                                                     | University of California, Berkeley                                    | United States of America (the)                             |
| Dauvin, Marjorie     | Life sciences teaching assistant                                                        | Miss                                                                  | Belgium                                                    |
| Daveri, Andrea       | PhD                                                                                     | Université de Lausanne                                                | Switzerland                                                |
| Davi, Natalie        | PhD Student                                                                             | Lancaster University                                                  | United Kingdom of Great Britain and Northern Ireland (the) |
| David, Christin      | Junior Research Group Leader - Theoretical Physics                                      | Friedrich-Schiller-Universität Jena                                   | Germany                                                    |
| David, Jacques       | Professor in plant genetics and breeding                                                | Montpellier SupAgro                                                   | France                                                     |
| David, Rinaldi       | Material science                                                                        | LafargeHolcim                                                         | France                                                     |
| DAVID, Romain        | PhD in Marine Ecology, Researcher in large observatory/experimental information systems | Institut national de la recherche agronomique INRA / MISTEA           | France                                                     |
| DAVID, Fernand       | Assistant Professor: Palaeoecology                                                      | CEREGE. Aix-Marseille University                                      | France                                                     |
| David-Barrett, Tamas | prof of human evolution and behaviour                                                   | Universidad del Desarrollo and University of Oxford                   | United Kingdom of Great Britain and Northern Ireland (the) |
| Davidova, Dr Marie   | Lecturer, Architect                                                                     | Welsh School of Architecture, Cardiff University                      | United Kingdom of Great Britain and Northern Ireland (the) |
| Davidson, Nicholas   |                                                                                         | Nick Davidson Environmental                                           | United Kingdom of Great Britain and Northern Ireland (the) |
| Davidson, Trent      | Graduate Student, Sociology                                                             | University of Colorado Boulder                                        | United States of America (the)                             |
| davies, robert       | Associate Professor of Professional Practice, Global Change                             | Utah State University                                                 | United States of America (the)                             |
| Davies, Jonathan     | Postdoctoral Research Scientist                                                         | Stockholm University                                                  | Sweden                                                     |
| Davies, Tony         | Professor of Physiology (retired)                                                       | Zambia School of Medicine                                             | Zambia                                                     |

|                            |                                                                            |                                                                                   |                                                            |
|----------------------------|----------------------------------------------------------------------------|-----------------------------------------------------------------------------------|------------------------------------------------------------|
| Davies, Gillian            | Senior Ecological Scientist and Visiting Scholar                           | BSC Group, Inc. and Tufts University Global Development and Environment Institute | United States of America (the)                             |
| Davies, Hugh               | Post-doctoral research fellow                                              | Charles Darwin University                                                         | Australia                                                  |
| Davies, Rhiannon           | Assistant Director Academics, Summer                                       | Appleby College                                                                   | Canada                                                     |
| Davies, Mark               | Professor of Bioscience                                                    | University of Sunderland                                                          | United Kingdom of Great Britain and Northern Ireland (the) |
| Davies, Sarah              | Conservation biologist and research manager                                | DST-NRF Centre of Excellence for Invasion Biology                                 | South Africa                                               |
| Davies, Phil               | Agronomy and crop breeding                                                 | South Australian Research and Development Institute                               | Australia                                                  |
| Davies, Joanna             | MD, Professor                                                              | University of Southern California                                                 | United States of America (the)                             |
| Davies, Kelvin             | University Dean, Prof. of Biochemistry, Mol. Biol., Gerontology & Medicine | University of Southern California                                                 | United States of America (the)                             |
| Davis, William             | Physician                                                                  | Private practice                                                                  | United States of America (the)                             |
| Davis, James               | Geochemist                                                                 | Lawrence Berkeley National Laboratory                                             | United States of America (the)                             |
| Davis, J T                 | Geologist                                                                  | Retired                                                                           | United States of America (the)                             |
| Davis, Sam                 | Conservation Scientist                                                     | Dogwood Alliance                                                                  | United States of America (the)                             |
| Davis, Stephen             | Distinguished Professor of Biology                                         | Pepperdine University                                                             | United States of America (the)                             |
| Davis, Jenny               | Director, Research Institute for Environment & Livelihoods                 | Charles Darwin University                                                         | Australia                                                  |
| Davis, Drew                | Associate Research Scientist                                               | University of Texas Rio Grande Valley                                             | United States of America (the)                             |
| Davis, Anna                | Physiology                                                                 | Bastyr University                                                                 | United States of America (the)                             |
| Davis, Amy                 | Postdoctoral Scientist, Ecology                                            | Ghent University                                                                  | Belgium                                                    |
| Davis, Robert              | Senior Lecturer in Wildlife Conservation                                   | Edith Cowan University                                                            | Australia                                                  |
| Davis, Kate                | Computational Chemistry PhD Student                                        | University of Florida                                                             | United States of America (the)                             |
| Davis, Naomi               | Environmental Scientist                                                    | Parks Victoria                                                                    | Australia                                                  |
| Davis, Adrian              | Ecologist PhD and Medical Doctor                                           | University of Sydney                                                              | Australia                                                  |
| Davison, Ross              | Remote Sensing Graduate Student                                            | University of California, Santa Cruz                                              | United States of America (the)                             |
| Davison, John              | Research fellow, Ecology                                                   | University of Tartu                                                               | Estonia                                                    |
| Davitt, Lina               | Dr Psychology                                                              | Bangor University                                                                 | United Kingdom of Great Britain and Northern Ireland (the) |
| Davoren, Elandrie          | Post-doctoral researcher, Environmental Science                            | Rhodes University                                                                 | South Africa                                               |
| Davoult, Dominique         | Professor                                                                  | Sorbonne Université                                                               | France                                                     |
| Davuliene, Lina            | Scientist, Environmental Physics                                           | FTMC                                                                              | Lithuania                                                  |
| Davydov, Iakov             | Postdoc, computational biology                                             | F. Hoffmann La Roche Ltd                                                          | Switzerland                                                |
| Dawson, Wayne              | Ecologist                                                                  | Durham University                                                                 | United Kingdom of Great Britain and Northern Ireland (the) |
| Dawson, Paul               | PhD, Mechanical Engineering, Professor                                     | Boise State University                                                            | United States of America (the)                             |
| DAWSON, PAUL               | PhD, Mechanical Engineering, Professor                                     | Boise State University                                                            | United States of America (the)                             |
| Dawson Shepherd, Alexander | Independent Environmental Consultant                                       |                                                                                   | United Kingdom of Great Britain and Northern Ireland (the) |
| Day, Jo                    | Conservation Geneticist                                                    | Taronga Conservation Society Australia                                            | Australia                                                  |
| Day, Belinda               | Conservation Biologist and Freshwater Biologist                            | University of Cape Town                                                           | South Africa                                               |
| Day, Jenny                 | Extraordinary Professor                                                    | University of the Western Cape                                                    | South Africa                                               |

|                             |                                                                     |                                                                                                    |                                                            |
|-----------------------------|---------------------------------------------------------------------|----------------------------------------------------------------------------------------------------|------------------------------------------------------------|
| Day, Roger                  | Prog Executive, Action on Invasives                                 | CABI                                                                                               | United Kingdom of Great Britain and Northern Ireland (the) |
| Dayan, Tamar                | Professor of Zoology                                                | Tel Aviv University                                                                                | Israel                                                     |
| Dayananda, Salindra Kasun   | PhD candidate                                                       | Guangxi Key Laboratory of Forest Ecology and Conservation, College of Forestry, Guangxi University | Sri Lanka                                                  |
| Dayrit, Fabian              | Professor of Chemistry                                              | Ateneo de Manila University                                                                        | Philippines (the)                                          |
| Ddumba, Saul Daniel         | Lecturer/Climate Science, Geography, Environmental Science & Policy | Makerere University                                                                                | Uganda                                                     |
| De Angelis, Alejandro       | Associated Professor. Environmental Anthropology                    | Scalabrini Ortiz National University (unso.edu.ar)                                                 | Argentina                                                  |
| De Angelo, Carlos           | Researcher                                                          | Instituto de Ciencias de la Tierra, Biodiversidad y Ambiente (ICBIA)                               | Argentina                                                  |
| DE ARAUJO, EDILSON Divino   | Professor                                                           | Federal University of Sergipe                                                                      | Brazil                                                     |
| De Baets, Bernard           | Senior Full Professor                                               | Ghent University                                                                                   | Belgium                                                    |
| de Bettignies, Florian      | Doctor Marine Ecology, Coastal Ecosystems                           | Sorbonne University                                                                                | France                                                     |
| De Block, Petra             | research scientist                                                  | Meise Botanic Garden                                                                               | Belgium                                                    |
| De Boeck, Hans              | senior scientist, global change ecology                             | University of Antwerp                                                                              | Belgium                                                    |
| de Boer, Bertram F.         | PhD candidate                                                       | Institute of Environmental Sciences, Leiden University                                             | Netherlands (the)                                          |
| de Boer, Wietse             | Senior Scientist & Professor Soil Microbial Ecology                 | NIOO-KNAW & Wageningen UNiversity                                                                  | Netherlands (the)                                          |
| de Bruin, Sytze             | Associate professor                                                 | Wageningen University                                                                              | Netherlands (the)                                          |
| de Bruin, Tessa             | PhD candidate in ecology                                            | UCLouvain                                                                                          | Belgium                                                    |
| de Bruyn, P.J.Nico          | Associate Professor / Large Mammal Ecology                          | University of Pretoria                                                                             | South Africa                                               |
| De Bruyn, Luc               | Nature Conservation, Evolutionary Ecology                           | Research Institute for Nature and Forest (INBO), University of Antwerp                             | Belgium                                                    |
| de Busserolles, Fanny       | Researcher marine biology and neuroecology                          | The University of Queensland                                                                       | Australia                                                  |
| de Carne, Sophie            | Postdoctoral researcher in Immuno-oncology                          | The Francis Crick Institute                                                                        | United Kingdom of Great Britain and Northern Ireland (the) |
| de Carvalho, Jorge          | Associate Professor                                                 | Faculdade de Ciências da Universidade do Porto                                                     | Portugal                                                   |
| De Carvalho, Ignes          | PhD                                                                 | Université de Lausanne                                                                             | Switzerland                                                |
| De Carvalho, Ana Carolina   | PhD Student - Immunology and Virology                               |                                                                                                    | Brazil                                                     |
| De Carvalho, Rafael         | PhD Student                                                         | Centre for Functional Ecology –University of Coimbra                                               | Portugal                                                   |
| de Castro, Francisco        | Senior Scientific Officer / Theoretical Ecology                     | AFBI                                                                                               | United Kingdom of Great Britain and Northern Ireland (the) |
| de Chiara, Cesira           | Structural Biology                                                  | The Francis Crick Institute                                                                        | United Kingdom of Great Britain and Northern Ireland (the) |
| de Clercq, Emeric           | Physicist                                                           | Observatoire de Paris                                                                              | France                                                     |
| De Cubber, Lola             | PhD marine biology                                                  | UMR 8187 LOG, U. Lille, ULCO, CNRS, France                                                         | France                                                     |
| de Daruvar, Antoine         | Professor bioinformatics                                            | Université de Bordeaux                                                                             | France                                                     |
| de Dato, Giovanbattista     | Researcher                                                          | CREA Research Centre for Forestry and Wood                                                         | Italy                                                      |
| DE DOMENICO, Emilio         | Retired Full Professor of Biological Oceanography                   | University of Messina (Sicily)                                                                     | Italy                                                      |
| de França Souza, Renan      | Professor of Ecology and Evolution                                  | Universidade Salgado de Oliveira                                                                   | Brazil                                                     |
| de Freitas, Carlos Henrique | Professor - General Ecology                                         | Centro Universitário do Planalto de Araxá - UNIARAXÁ - Minas Gerais State                          | Brazil                                                     |



|                            |                                                           |                                                                                                                                           |                                |
|----------------------------|-----------------------------------------------------------|-------------------------------------------------------------------------------------------------------------------------------------------|--------------------------------|
| de Freitas Junior, Gerson  | Professor/Environmental Education                         | Technological College of São Paulo State - FATEC                                                                                          | Brazil                         |
| de Frutos, Angel           |                                                           | Helmholtz Centre for Environmental Research –<br>UFZ and German Centre for Integrative Biodiversity<br>Research (iDiv) Halle-Jena-Leipzig | Germany                        |
| de Gasper, André Luís      | Professor of botany mas biogrography                      | Universidade Regional de Blumenau                                                                                                         | Brazil                         |
| De Gasperin, Ornela        | Postdoctoral researcher                                   | University of Lausanne, Switzerland                                                                                                       | Switzerland                    |
| de Goede, Eefje            | PhD Candidate, environmental biology                      | CML, Leiden University                                                                                                                    | Netherlands (the)              |
| de Gortari, Rebeca         | Researcher                                                | Instituto de Investigaciones Sociales UNAM                                                                                                | Mexico                         |
| de Grazia, Ugo             | Biologist, PhD                                            | Fondazione IRCCS Istituto Neurologico Carlo Besta                                                                                         | Italy                          |
| De Groeve, Ben             | PhD student / Communication science                       | Ghent University                                                                                                                          | Belgium                        |
| de Groot-Hedlin, Catherine | researcher, geophysics                                    | Scripps Institution of Oceanography, University of<br>California, San Diego                                                               | United States of America (the) |
| de Guzman, Ioar            | PhD student in stream ecology                             | University of the Basque Country (UPV/EHU)                                                                                                | Spain                          |
| de Haan, Michel            | PhD                                                       | Wageningen University & Research                                                                                                          | Netherlands (the)              |
| de Haan, Myriam            | Researcher Eumycetozoa                                    | Botanic Garden Meise                                                                                                                      | Belgium                        |
| de Herralde, Felicidad     | Researcher                                                | IRTA                                                                                                                                      | Spain                          |
| De Jaegher, Bram           | PhD researcher                                            | Ghent university                                                                                                                          | Belgium                        |
| de Jager, Monique          | researcher / ecology                                      | netherlands institute of ecology (NIOO-KNAW)                                                                                              | Netherlands (the)              |
| de Jong, Carmen            | Professor of Hydrology                                    | University of Strasbourg                                                                                                                  | France                         |
| de Jong, Elise             | Biology and environmentalism                              | University of Amsterdam                                                                                                                   | Netherlands (the)              |
| de Jong, Hans              | professor                                                 | Wageningen University & Research                                                                                                          | Netherlands (the)              |
| de Jong, Peter             | University Lecturer                                       | Wageningen University                                                                                                                     | Netherlands (the)              |
| de Jong, Johan             | PhD candidate                                             | Wageningen University & Research                                                                                                          | Netherlands (the)              |
| De Jong, Martin            | Sustainability & Strategy for business and<br>governments | University of Amsterdam                                                                                                                   | Netherlands (the)              |
| de Juan, Silvia            | Marie Curie Fellow, marine conservation                   |                                                                                                                                           | Spain                          |
| De Keyzer, Els             | PhD student Marine Biology                                | KU Leuven                                                                                                                                 | Belgium                        |
| de Kock, Melissa           | Climate informed conservation                             |                                                                                                                                           | South Africa                   |
| de la Cueva, Horacio       | Investigador Titular C                                    | CICESE                                                                                                                                    | Mexico                         |
| de la Estrella, Manuel     | Assistant Professor in Botany                             | Universidad de Córdoba                                                                                                                    | Spain                          |
| de la Fuente, Jose         | Professor Molecular biology & Biotechnology               | SaBio, IREC (CSIC-UCLM-JCCM)                                                                                                              | Spain                          |
| de La Harpe, Marylaure     | post-doc in molecular biology                             | University of Vienna                                                                                                                      | Austria                        |
| de la Mata, Isabel         | Professor of Biochemistry and Molecular Biology           | Universidad Complutense de Madrid                                                                                                         | Spain                          |
| de la Mata Pombo, Raul     | Researcher/Forest genetics                                | IRTA                                                                                                                                      | Spain                          |
| De la Peña, José-Antonio   | Mathemativ                                                |                                                                                                                                           | Mexico                         |
| de la Riva, Ignacio        | Tenured Researcher                                        | High Council of Scientific Research (CSIC)                                                                                                | Spain                          |
| de La Rochebrochard, Elise | Senior Researcher, Epidemiology & Demography              | French National Demographic Institute (Ined, Paris,<br>France)                                                                            | France                         |
| de la Rosa, Carlos         | Executive Director nonprofit conservation<br>organization | Lindsay Wildlife Experience                                                                                                               | United States of America (the) |
| de la Rosa, Raul           | Tenured Scientist                                         | Ifapa, Junta de Andalucia                                                                                                                 | Spain                          |
| DE LA ROSA, CARLOS L       | President & CEO                                           | Center for Plant Conservation                                                                                                             | United States of America (the) |

|                                   |                                                           |                                                                                         |                                                            |
|-----------------------------------|-----------------------------------------------------------|-----------------------------------------------------------------------------------------|------------------------------------------------------------|
| de la Rubia, Ageles               |                                                           | University Autonoma of Madrid                                                           | Spain                                                      |
| de la Selva, Sara María Teresa    | Professor / Physics                                       | Universidad Autónoma Metropolitana                                                      | Mexico                                                     |
| de la Sienra, Emilia              | Worldviews and Transformative Learning for Sustainability | University of Sydney / National Autonomous University of Mexico                         | Australia                                                  |
| de la Torre, Stella               | Professor School of Biology                               | Universidad San Francisco de Quito                                                      | Ecuador                                                    |
| de la Torre, Florencio            | Assistant Professor of Analytical Chemistry               | University of Girona                                                                    | Spain                                                      |
| de la Torre, Mayra                | Full Professor /biotechnology                             | Centro de Investigación y Desarrollo en Agrobiotecnología Alimentaria                   | Mexico                                                     |
| de las Heras Muela, Emilio        | Author of a Blog on Climate Change and Economy            | Expansion                                                                               | Spain                                                      |
| de Lavergne, Casimir              | Research associate                                        | Sorbonne University                                                                     | France                                                     |
| De León, Luis F.                  | Assistant Professor                                       | University of Massachusetts Boston                                                      | United States of America (the)                             |
| De León-Nava, Marco               | Researcher-Biomedicine                                    | Centro de Investigación Científica y de Educación Superior de Ensenada, Baja California | Mexico                                                     |
| de Lillo, Enrico                  | Full professor                                            | DiSSPA - University of Bari Aldo Moro                                                   | Italy                                                      |
| De Lirio, Elton John              |                                                           | University of São Paulo                                                                 | Brazil                                                     |
| de lombærde, emiel                | postdoc                                                   | Ghent University                                                                        | Belgium                                                    |
| De Maeyer, Kobe                   | Master student and student research assistant             | University of Potsdam and Potsdam Institute for Climate Impact Research (PIK)           | Germany                                                    |
| de Mahieu, Aurore                 | Research assistant                                        | Catholic University of Louvain                                                          | Belgium                                                    |
| De Matteis, Alessandro            | Research Fellow                                           | University of East Anglia                                                               | United Kingdom of Great Britain and Northern Ireland (the) |
| De Meester, Nele                  | Postdoc                                                   | Ghent University                                                                        | Belgium                                                    |
| de Mello, Kaline                  | postdoc                                                   | University of São Paulo                                                                 | Brazil                                                     |
| De Mello, Rodrigo                 | Professor/Biologist (Ecology)                             | Universidade Estadual de Ponta Grossa (UEPG)                                            | Brazil                                                     |
| de Mello Martins, Felipe          | postdoc                                                   | University of São Paulo                                                                 | Brazil                                                     |
| de Mello Neto, Joao               | Professor of Physics                                      | Federal University of Rio de Janeiro                                                    | Brazil                                                     |
| de Melo, Filipe Augusto Gonçalves | Biologist/Ichthyologist                                   | Universidade Estadual do Piauí                                                          | Brazil                                                     |
| de Mendonça, Philippe Gil         | Research Scientist (Biology: Epidemiology)                | CESAM (University of Lisbon)                                                            | Portugal                                                   |
| De Miguel Rubio, Ramon Jose       | Researcher and Business manager / Freshwater ecosystems   | Guadalquivir / University of Cordoba                                                    | Spain                                                      |
| DE OLIVEIRA, DANIEL               | Doctorate Student                                         | Universidade Federal do Rio de Janeiro                                                  | Brazil                                                     |
| DE OLIVEIRA, RAQUEL MARIA         | PROFESSORA DA MEDICINA VETERINÁRIA                        | ESCOLA DE MVETERINÁRIA E ZOOTECNIA DA UNIVERSIDADE FEDERAL DE GOIÁS                     | Brazil                                                     |
| de Oliveira Bredariol, Tomás      | Environmental Engineer and Environmental analyst          | IBAMA                                                                                   | Brazil                                                     |
| de Oliveira Roque, Fabio          | Professor/Ecology                                         | UFMS                                                                                    | Brazil                                                     |
| De Palmas, Stéphane               | PhD Candidate                                             | Academia Sinica, National Taiwan Normal University                                      | Taiwan                                                     |
| de Paula, Eneida                  | Full Professor                                            | University of Campinas                                                                  | Brazil                                                     |
| de Paula-Souza, Juliana           | Professor/Researcher in Plant Systematics                 | Universidade Federal de São João del Rei                                                | Brazil                                                     |
| de Pedro Carracedo, Javier        | Lecturer                                                  | University of Alcalá                                                                    | Spain                                                      |
| de Pietri, Aroa                   | Graduate student                                          | University of Ghent                                                                     | Belgium                                                    |
| De Potter, Kristell               | Environmental sciences                                    | Université Libre de Bruxelles                                                           | Belgium                                                    |
| de Pous, Philip                   | PhD Ecologist                                             | vive.earth                                                                              | Netherlands (the)                                          |

|                                          |                                                                                                                                      |                                                    |                                                            |
|------------------------------------------|--------------------------------------------------------------------------------------------------------------------------------------|----------------------------------------------------|------------------------------------------------------------|
| de Rigo, Daniele                         | Earth science and ecology                                                                                                            | Maieutike Research Initiative                      | Italy                                                      |
| de Rijcke, Sarah                         | Professor of Science, Technology and Innovation Studies                                                                              | Leiden University                                  | Netherlands (the)                                          |
| de Rochambeau, Hubert                    | Animal genetics                                                                                                                      | Inra                                               | France                                                     |
| De Roo, Linus                            | PhD student, tree survival under climate change                                                                                      | Ghent University                                   | Belgium                                                    |
| De Ruijter, Norbert                      | Ass professor - Plant Cell Biology                                                                                                   | Wageningen University                              | Netherlands (the)                                          |
| de Ruiten, Marleen                       | Researcher of natural disasters                                                                                                      | Institute for environmental studies                | Netherlands (the)                                          |
| De Schutter, Olivier                     | Governance                                                                                                                           | UCLouvain                                          | Belgium                                                    |
| de Sède-Marceau, Marie-Hélène            | Professor-Geography                                                                                                                  | University of Franche-Comté                        | France                                                     |
| De Serio, Francesca                      | Senior Researcher                                                                                                                    | Polytechnic University of Bari                     | Italy                                                      |
| de Silva, Shermin                        | Conservation biologist                                                                                                               | Trunks & Leaves Inc.                               | United States of America (the)                             |
| De Sousa Bastos, Lydiane Lucia           |                                                                                                                                      | Universidade Federal de Viçosa                     | Brazil                                                     |
| de Souza, Vitor                          | Professor / Physics                                                                                                                  | University of Sao Paulo                            | Brazil                                                     |
| de Souza Werneck, Márcio                 | Plant Ecology                                                                                                                        | Universidade Federal do ABC                        | Brazil                                                     |
| de Thoisy, Benoit                        | Science Director                                                                                                                     | Kwata NGO                                          | French Guiana                                              |
| De Troyer, Niels                         | Academic Assistant - PhD Candidate                                                                                                   | Ghent University                                   | Belgium                                                    |
| de Vareilles, Héloïse                    | Engineer pursuing PhD, Neuroscience                                                                                                  | CEA                                                | France                                                     |
| de Vera, Jean-Pierre Paul                | Research Group Leader / Astrobiology                                                                                                 | German Aerospace Center (DLR)                      | Germany                                                    |
| de Vicente Alvarez-Manzaneda, Inmaculada | Associate Professor- Ecology                                                                                                         | University le Granada                              | Spain                                                      |
| de Vienne, Dominique                     | Emeritus professor in biology                                                                                                        |                                                    | France                                                     |
| de Vienne, Damien                        | CNRS researcher                                                                                                                      | Laboratoire de Biométrie et Biologie Évolutive     | France                                                     |
| de Vilchez Moragues, Pau                 | Professor Ajudant de Dret Internacional Públic i subdirector del Laboratori Interdisciplinari sobre Canvi Climàtic de la UIB (LINCC) | Universitat de les Illes Balears UIB               | Spain                                                      |
| de Villiers, Marienne                    | Ecologist                                                                                                                            | CapeNature                                         | South Africa                                               |
| De Visscher, Lander                      | PhD student in Bioscience Engineering                                                                                                | Ghent University                                   | Belgium                                                    |
| De Vleeschouwer, Kristel                 | Conservation Biologist                                                                                                               | Royal Zoological Society of Antwerp                | Belgium                                                    |
| de Vries, Anne                           | PhD candidate and lecturer                                                                                                           | Tilburg University                                 | Netherlands (the)                                          |
| de Vries, Geert                          | Sociology                                                                                                                            | Vrije Universiteit Amsterdam                       | Netherlands (the)                                          |
| de Vries, Mindert                        | Specialist Advisor Nature Based Solutions                                                                                            | Deltares                                           | Netherlands (the)                                          |
| De Vroey, Mathilde                       | PhD candidate - Geomatics                                                                                                            | Earth and Life Institute - UCLouvain               | Belgium                                                    |
| De Vuyst, Florian                        | Professor of University                                                                                                              | University of Technology of Compiègne              | France                                                     |
| de Waart, Jules                          | Fysica geography                                                                                                                     | University of Amsterdam                            | Netherlands (the)                                          |
| De Waart, Jules                          | Geoscience                                                                                                                           | University of Amsterdam                            | Netherlands (the)                                          |
| de Wergifosse, Louis                     | PhD student                                                                                                                          | UCLouvain                                          | Belgium                                                    |
| Deal, Morgan                             | Postdoctoral researcher in Astrophysics                                                                                              | Instituto de Astrofísica e Ciências do Espaço (IA) | France                                                     |
| Dean, Samantha                           | Science Lab Coordinator, Adjunct Professor, Herpetologist                                                                            | University of Baltimore                            | United States of America (the)                             |
| Dean, Joshua                             | Lecturer in Biogeochemical Cycles                                                                                                    | University of Liverpool                            | United Kingdom of Great Britain and Northern Ireland (the) |

|                               |                                                          |                                                                                          |                                                            |
|-------------------------------|----------------------------------------------------------|------------------------------------------------------------------------------------------|------------------------------------------------------------|
| Dearing, John                 | Emeritus Professor                                       | University of Southampton                                                                | United Kingdom of Great Britain and Northern Ireland (the) |
| Debiec, MD, PhD, DPhil, Jacek | Assistant Professor of Psychiatry and Neuroscience       | University of Michigan                                                                   | United States of America (the)                             |
| Debnath, Nirmal               | Doctoral student                                         | Department of Ecology and Environmental Science, Assam University, Silchar-788011, INDIA | India                                                      |
| Deboyser, Bernard             | Engineer and teacher                                     | University of Mons (Belgium)                                                             | Belgium                                                    |
| Debray, Jérôme                | Engineer                                                 | CNRS                                                                                     | France                                                     |
| DeBruyn, Jennifer             | Associate Professor, Environmental and Soil Science      | University of Tennessee                                                                  | United States of America (the)                             |
| Debusscher, Bos               | Researcher                                               | Ghent University                                                                         | Belgium                                                    |
| Decelle, Sophie               |                                                          | Association du Calao asbl                                                                | Senegal                                                    |
| Dechesne, Arnaud              | Senior Researcher, Environmental Microbiology            | Technical University of Denmark                                                          | Denmark                                                    |
| Dechoum, Michele              | Assistant Professor                                      | Federal University of Santa Catarina                                                     | Brazil                                                     |
| Deckers, Patrick              | Orthopedic Surgeon                                       | Zuyderland Hospital                                                                      | Netherlands (the)                                          |
| DeClerck, Fabrice             | Science Director                                         | EAT and OneCGIAR                                                                         | France                                                     |
| Decotte, Eva                  | Family Doctor, medical students supervisor               | University Toulouse III Paul Sabatier                                                    | France                                                     |
| DECURTIS, CHARLES             | Freshwater Conservation Program Manager                  | The Nature Conservancy                                                                   | United States of America (the)                             |
| Decuyper, Mathieu             | Research Fellow                                          | Wageningen University                                                                    | Netherlands (the)                                          |
| Dedeine, Franck               | Assistant Professor in evolutionary ecology              | University of Tours                                                                      | France                                                     |
| Deegan, Linda                 | Senior Scientist                                         | Woods Hole Research Center                                                               | United States of America (the)                             |
| Deeley, David                 | Associate Adjunct Professor, Ecologist                   | University of Western Australia                                                          | Australia                                                  |
| Defolie, Charlotte            | Behavioural Ecology                                      | University of Göttingen                                                                  | Germany                                                    |
| Defrance, Dimitri             | Post Doctoral position                                   | INRA                                                                                     | France                                                     |
| Degenne, Pascal               | Research Scientist - Geomatics and modelling             | Cirad                                                                                    | France                                                     |
| Degli-Esposti, Davide         | Research scientist                                       | National Research Institute of Science and Technology for Environment and Agriculture    | France                                                     |
| Deguilloux, Marie-France      | Maître de Conférences - Génétique                        | Bordeaux University                                                                      | France                                                     |
| Deguines, Nicolas             | Postdoctoral research fellow (Ecology)                   | Université Paris-Sud                                                                     | France                                                     |
| Dehalt, Annette               | Biologist/Instructor                                     | Camosun College                                                                          | Canada                                                     |
| Dehez, Pierre                 | Economics                                                | University of Louvain, Louvain-la-Neuve                                                  | Belgium                                                    |
| Dehnhard, Nina                | Senior Research Fellow / Seabird Ecology                 | Norwegian Institute for Nature Research                                                  | Norway                                                     |
| Deinet, Stefanie              | Postgraduate Research Assistant                          | Zoological Society of London                                                             | United Kingdom of Great Britain and Northern Ireland (the) |
| Deisinger, Julia              | PhD student in microbiology                              | Medical microbiology                                                                     | Germany                                                    |
| Dejardin, Emmanuel            | Head of the Lab of Mol. Immunology & Signal Transduction | University of Liège                                                                      | Belgium                                                    |
| del Campo, Rubén              | Postdoctoral researcher in Freshwater Ecology            | IGB - Berlin                                                                             | Germany                                                    |
| del Moral, Roger              | Ecology Professor Emeritus                               | University of Washington                                                                 | United States of America (the)                             |
| Del Toro Orozco, Wezddy       | Researcher                                               | Mamirauá Sustainable Development Institute                                               | Brazil                                                     |
| Del Valle, Antonio            | Wildlife Ecology                                         |                                                                                          | United States of America (the)                             |
| Del-Claro, Kleber             | Research Director                                        | Universidade Federal de Uberlândia                                                       | Brazil                                                     |
| Delabie, Jacques Hubert       | Research Entomologist                                    | Cocoa Research Center                                                                    | Brazil                                                     |
| Delacharlerie, Sophie         | Bioengineer                                              | SPW                                                                                      | Belgium                                                    |

|                              |                                                            |                                                                                              |                                                            |
|------------------------------|------------------------------------------------------------|----------------------------------------------------------------------------------------------|------------------------------------------------------------|
| Delahaie, Boris              | Post-doctoral Research Associate / Ecology and Evolution   | University of Cambridge                                                                      | United Kingdom of Great Britain and Northern Ireland (the) |
| Delannoy, Louis              | PhD student                                                | INRIA / UGA                                                                                  | France                                                     |
| Délano-Frier, John           | Research Professor                                         | Centro de Investigación y de Estudios Avanzados del IPN (Cinvestav), Unidad Irapuato         | Mexico                                                     |
| Delarue, Marianne            | Professor                                                  | Université Paris Sud                                                                         | France                                                     |
| Delattre, Hélène             | Engineer, Geosciences                                      | University of Franche-Comté                                                                  | France                                                     |
| Delaye, Luis                 | PI                                                         | Cinvestav Irapuato                                                                           | Mexico                                                     |
| Delbene, Claudio             | Arquitecto                                                 | FADU-UBA                                                                                     | Argentina                                                  |
| Delefortrie, Zoé             | PhD candidate                                              | Indiana State University                                                                     | United States of America (the)                             |
| DeLeon, Jenni                | MD                                                         |                                                                                              | United States of America (the)                             |
| Delerce, Sylvain             | PhD in geochemistry                                        | CNRS                                                                                         | France                                                     |
| Delescluse, Matthias         | Assistant Profeasor, Geophysicist                          | Ecole Normale Supérieure de Paris                                                            | France                                                     |
| delestrade, anne             | researcher ecology                                         | research centre of alpine ecosystems                                                         | France                                                     |
| Deleys, Noémie               | Ecology, marine environment                                | ifremer                                                                                      | France                                                     |
| Delforge, Pierre             | Orchidologist                                              | IUCN                                                                                         | Belgium                                                    |
| Delfraro, Adriana            | Associate Professor of virology                            | Universidad de la República                                                                  | Uruguay                                                    |
| Delgadillo Ordóñez, Nathalia | Biologist, Master in Environmental Science and Engineering | King Abdullah University of Science and Technology                                           | Colombia                                                   |
| Delgado, Alonso              | Researcher oceanic invertebrate systematics                | Portland State university                                                                    | United States of America (the)                             |
| Delgado, M Dolores           | Professor of Molecular Biology                             | University                                                                                   | Spain                                                      |
| Delgado Granados, Hugo       | Researcher / Glaciology                                    | Universidad Nacional Autónoma de México                                                      | Mexico                                                     |
| Delgado-Correal, Camilo      | Researcher                                                 | GCPA                                                                                         | Colombia                                                   |
| Delhay, Guillaume            | PhD Ecology                                                | Université Libre de Bruxelles                                                                | Belgium                                                    |
| Delibes-Mateos, Miguel       | Senior researcher                                          | Instituto de Estudios Sociales Avanzados (IESA-CSIC)                                         | Spain                                                      |
| Dell, Bernard                | Professor Emeritus                                         | Murdoch University                                                                           | Australia                                                  |
| Dell, Maria                  | PhD student                                                | Leibniz Institute for Infection Biology and Natural Product Chemistry - Hans Knöll Institute | Germany                                                    |
| Dell Oro, Melanie            | Nutritional Scientist                                      |                                                                                              | Germany                                                    |
| Dell'Ambrogio, Gilda         | scientific assistant, ecotoxicology                        | Ecotox Centre                                                                                | Switzerland                                                |
| Dell'Arciccia, Gaia          | Seabird scientist                                          | Auckland Council                                                                             | New Zealand                                                |
| Della Valle, Nives           | Senior Researcher                                          | Eurac Research                                                                               | Italy                                                      |
| Dellape, Pablo M.            | Researcher CONICET                                         | Museo de La Plata                                                                            | Argentina                                                  |
| Dellapé, Pablo M.            | Researcher CONICET                                         | Museo de La Plata                                                                            | Argentina                                                  |
| DellaSala, Dominick          | Chief Scientist                                            | Geos Institute                                                                               | United States of America (the)                             |
| DELMAS, Lucile               | MFSD                                                       | IFREMER                                                                                      | France                                                     |
| Delord, Karine               | Research Engineer                                          | CNRS                                                                                         | France                                                     |
| Delpierre, Nicolas           | Assistant professor in Ecology                             | Université Paris-Sud                                                                         | France                                                     |
| Delrez, Laetitia             | Postdoctoral researcher in Astrophysics                    | University of Cambridge                                                                      | United Kingdom of Great Britain and Northern Ireland (the) |
| Delroisse, Jérôme            | Researcher                                                 | University of Mons                                                                           | Belgium                                                    |
| Delsuc, Frédéric             | Research Director in Evolutionary Biology                  | Centre National de la Recherche Scientifique (CNRS)                                          | France                                                     |

|                          |                                                          |                                                                                      |                                                            |
|--------------------------|----------------------------------------------------------|--------------------------------------------------------------------------------------|------------------------------------------------------------|
| Delsuc, Marc-André       | research director cnrs                                   | IGBMC                                                                                | France                                                     |
| Deluen, Marine           | PhD student                                              | CNRS                                                                                 | France                                                     |
| Deluro, Christine        | Engineer                                                 | UCLA                                                                                 | United States of America (the)                             |
| DeLuycker, Anneke        | Associate Professor, Conservation Biology                | Smithsonian-Mason School of Conservation, Smithsonian Conservation Biology Institute | United States of America (the)                             |
| Delva, Pacôme            | Assistant professor                                      | Sorbonne Université                                                                  | France                                                     |
| Delves, Jess L           | Social Scientist in Climate Change Adaptation            | United Nations University                                                            | Italy                                                      |
| Délye, Christophe        | Scientist, Agronomy                                      | INRA                                                                                 | France                                                     |
| Demarchi, Layon Oreste   | Phd Student in Botany                                    | INPA                                                                                 | Brazil                                                     |
| DeMartini, Edward        | Adjunct Professor                                        | University of Hawaii, Hawaii Institute of Marine Biology                             | United States of America (the)                             |
| Demarty, Jerome          | Researcher Dr in ecohydrology                            | Research Institute of the Development (IRD)                                          | France                                                     |
| dembo, ron               | lifetime Fellow                                          | Fields Institute                                                                     | Canada                                                     |
| Dembowski, MD, Christoph | Pediatrician                                             | IPPNW                                                                                | Germany                                                    |
| Demeneix, Barbara        | Professor of Endocrinology                               | Museum National d'Histoire Naturelle/ CNRS Paris                                     | France                                                     |
| DEMENOIS, Julien         | "4 per 1000" correspondent / Ecology                     | CIRAD                                                                                | France                                                     |
| Demir, Ogün              | PhD. Cand. - Botany and Ecology                          | Tekirdağ Namık Kemal University                                                      | Turkey                                                     |
| Demol, Miro              | PhD                                                      | Ghent University                                                                     | Belgium                                                    |
| Demsar, Urska            | Associate Professor in Geoinformatics                    | University of St Andrews                                                             | United Kingdom of Great Britain and Northern Ireland (the) |
| den Blaauwen, Tanneke    | Associate Prof Bacterial Cell Biology                    | Swammerdam Institute for Life Sciences                                               | Netherlands (the)                                          |
| Dendoncker, Morgane      | forest ecology                                           | Earth and Life Institute, UCLouvain                                                  | Belgium                                                    |
| Dendup, Ugyen            | Plant Protection Supervisor                              | National Plant Protection Centre                                                     | Bhutan                                                     |
| DeNeale, Richard         | Pharmaceutical Chemistry                                 | Wyeth Research (retired)                                                             | United States of America (the)                             |
| Denham, Charles          | Geophysicist (Retired)                                   | U.S. Geological Survey                                                               | United States of America (the)                             |
| Denkinger, Michael       | Internal Medicine                                        | Ulm University                                                                       | Germany                                                    |
| Dennig, Sr., Paul        | Materials Science and Engineering/Electrical Engineering |                                                                                      | United States of America (the)                             |
| Denning, Rod             | District Forester / Forestry                             | Oceana Conservation District                                                         | United States of America (the)                             |
| Dennings, Kelley         |                                                          | Center for Biological Diversity                                                      | United States of America (the)                             |
| Dennis, Paul             | Senior Lecturer                                          | UQ                                                                                   | Australia                                                  |
| Dennison, Brian          | Professor Emeritus                                       | University of North Carolina-Asheville                                               | United States of America (the)                             |
| Denvir, Audrey           | Geography                                                | University of Texas                                                                  | United States of America (the)                             |
| DEO, MUSHAGALUSA         | RESEARCHER, FISH ECOLOGY & BEHAVIOR                      | CENTRE OF RESEARCH ON HYDROBIOLOGY                                                   | Congo (the Democratic Republic of the)                     |
| Deonarine, Amrika        | Assistant Professor                                      | Texas Tech University                                                                | United States of America (the)                             |
| DEPANMAECKER, Damien     | Post-Doc Neurosciences                                   | CNRS                                                                                 | France                                                     |
| Depaulis, Frantz         | researcher in Ecology and Evolution                      | CNRS                                                                                 | France                                                     |
| Depauw, Leen             | PhD Forest and Nature research                           | Ghent University                                                                     | Belgium                                                    |
| Depecker, Jonas          | PhD researcher                                           | KU Leuven                                                                            | Belgium                                                    |
| derand, david            | Head of Durrell Conservation Training                    | Durrell Wildlife Conservation Trust                                                  | Mauritius                                                  |
| Derbyshire, Mark         | Research fellow                                          | Curtin University                                                                    | Australia                                                  |

|                         |                                                                |                                                       |                                                            |
|-------------------------|----------------------------------------------------------------|-------------------------------------------------------|------------------------------------------------------------|
| Derbyshire, Ellen       | PhD student in Quantum Computing                               | University of Edinburgh                               | United Kingdom of Great Britain and Northern Ireland (the) |
| DeRepentigny, Patricia  | PhD Candidate, Arctic sea ice and climate modeling             | University of Colorado Boulder                        | United States of America (the)                             |
| Dérer, Patrícia         | Biologist                                                      | Gothenburg University                                 | Sweden                                                     |
| Dereese, Sebastiaan     | Post-doc                                                       | Ghent University                                      | Belgium                                                    |
| Derežanin, Lorena       | PhD student in Evolutionary Biology - Genomics                 | Leibniz Institute for Zoo and Wildlife Research (IZW) | Germany                                                    |
| Dergam, Jorge           | Professor                                                      | Universidade Federal of Vicosa                        | Brazil                                                     |
| Derham, Tristan         | PhD Candidate, Ecology                                         | UNiversity of Tasmania                                | Australia                                                  |
| Deri, Eszter            | Conservation Ecology                                           |                                                       | United Kingdom of Great Britain and Northern Ireland (the) |
| Derouard, Jacques       | Professor, Physics                                             | University Grenoble-Alpes                             | France                                                     |
| Derraik, José           | Senior Research Fellow (Public Health)                         | Liggins Institute - University of Auckland            | New Zealand                                                |
| DERRIEN, Solene         | Engineer Assistant in Instrumentation for Atmospheric Research | CNRS - Aerology Laboratory (Laboratoire d'Aerologie)  | France                                                     |
| Derting, Terry          | Professor Biological Sciences                                  | Murray State University                               | United States of America (the)                             |
| Dery, Stephen           | Professor                                                      | University of Northern British Columbia               | Canada                                                     |
| DESAGHER, Solange       | staff scientist in cell biology                                | CNRS                                                  | France                                                     |
| DeSantis, Dominic       | Ecology and Evolutionary Biology                               | University of Texas at El Paso                        | United States of America (the)                             |
| Desbiez, Arnaud         | President, founder                                             | ICAS- Instituto de Conservacao de Animais Silvestres  | Brazil                                                     |
| Descalzo, Esther        | PhD student                                                    | Instituto de Investigación de Recursos Cinegéticos    | Spain                                                      |
| Descamps, Estelle       | Cell biologist                                                 | The Francis Crick Institute                           | United Kingdom of Great Britain and Northern Ireland (the) |
| Descamps, Charlotte     | PhD student - Ecology (plant-pollinator interactions)          | UCLouvain                                             | Belgium                                                    |
| Desclaux, Alice         | Professor                                                      | IRD                                                   | France                                                     |
| Descroix, Luc           | Senior investigator in Hydrology                               | IRD Institut de Recherche pour le Développement       | France                                                     |
| Desfosses, Ambroise     | Researcher in Structural Biology                               | Institut de Biologie Structurale                      | France                                                     |
| Desmit, Xavier          | Researcher marine ecosystem                                    | Royal Belgian Institute of Natural Sciences           | Belgium                                                    |
| DESOUHANT, Emmanuel     | Prof in Evolutionary Ecology                                   | University Lyon                                       | France                                                     |
| Despax, Aurélien        | Scientist, River Hydraulics                                    | Irstea                                                | France                                                     |
| Despland, Emma          | Professor, Biology                                             | Concordia University                                  | Canada                                                     |
| Despres, Laurence       | Professor Evolutionary Ecology                                 | University Grenoble Alpes                             | France                                                     |
| Dessolin, Jean          | Research Chemoinformatics                                      | CNRS-Bordeaux University                              | France                                                     |
| Destainville, Nicolas   | Full Professor, Theoretical Physics and Biophysics             | Univ. Toulouse III-Paul Sabatier                      | France                                                     |
| Desvars-Larrive, Amélie | Assistant Professor in Veterinary Public Health                | Veterinary University of Vienna, Austria              | Austria                                                    |
| Desvignes, Thomas       | Research Associate in Biology                                  | University of Oregon                                  | United States of America (the)                             |
| Determann, Juergen      | GEOPHYSICS                                                     | FEDERAL MINISTRY OF TRANSPORT AND DIGITAL DEVELOPMENT | Germany                                                    |
| DETRE, Pierre           | Engineering                                                    | Evolve Powertrains                                    | Belgium                                                    |
| Dettai, Agnes           | Molecular Evolution and Biodiversity                           | MNHN                                                  | France                                                     |
| Deutekom, Eva           | Ph.D. candidate                                                | Utrecht University                                    | Netherlands (the)                                          |
| DeVantier, Lyndon       | Coral Reef Ecology                                             | Coral Reef Research                                   | Australia                                                  |
| Devarajan, Kadambari    | PhD Candidate - Ecology and Evolutionary Biology               | University of Massachusetts, Amherst                  | India                                                      |

|                                |                                                                                |                                                                                                                  |                                                            |
|--------------------------------|--------------------------------------------------------------------------------|------------------------------------------------------------------------------------------------------------------|------------------------------------------------------------|
| Devaux, Céline                 | Ecology and Evolution                                                          | University of Montpellier                                                                                        | France                                                     |
| Devenish-Nelson, Ellie         | Teaching Fellow                                                                | University of Edinburgh                                                                                          | United Kingdom of Great Britain and Northern Ireland (the) |
| Devides Castello, Ana Carolina | Research                                                                       | Instituto Nacional da Mata Atlântica                                                                             | Brazil                                                     |
| Devillers, Rodolphe            | Professor of Geography                                                         | Memorial University of Newfoundland                                                                              | Canada                                                     |
| Devine, Carol                  | Research Fellow                                                                | Dahdaleh Institute for Global Health Research                                                                    | Canada                                                     |
| Devitt, Thomas                 | Research Affiliate/Research Fellow                                             | University of Texas at Austin                                                                                    | United States of America (the)                             |
| Devlin, Tadhg                  | PhD Student                                                                    | University of Edinburgh                                                                                          | United Kingdom of Great Britain and Northern Ireland (the) |
| Devlin-Kelly, Inez             | Professor Emerita, Biology                                                     | Bakersfield College                                                                                              | United States of America (the)                             |
| Devloo-Delva, Floriaan         | PhD candidate                                                                  | University of Tasmania                                                                                           | Australia                                                  |
| Devries, James                 | Research Scientist - Waterfowl Ecology                                         |                                                                                                                  | Canada                                                     |
| DeWaard, Jack                  | Scientific Director, Social and Behavioral Science Research                    | Population Council                                                                                               | United States of America (the)                             |
| Dewar, Colin                   | Consultant Emergency Medicine                                                  | Western Sussex Hospitals                                                                                         | United Kingdom of Great Britain and Northern Ireland (the) |
| DeWaters, Jan                  | Associate Professor                                                            | Clarkson University                                                                                              | United States of America (the)                             |
| Dexter, Eric                   | Post-doctoral researcher / Biology                                             | University of Basel                                                                                              | Switzerland                                                |
| deYoung, Brad                  | Professor/Oceanographer                                                        | Memorial University                                                                                              | Canada                                                     |
| Dezileau, Laurent              | Professor                                                                      | University of Caen Normandy                                                                                      | France                                                     |
| Dhabhai, Ravi                  | Research Associate                                                             | University of Saskatchewan                                                                                       | Canada                                                     |
| Dhami, manpreet                | Researcher                                                                     | Manaaki Whenua Landcare Research                                                                                 | New Zealand                                                |
| Dhaou, Dounia                  | PhD candidate                                                                  | Aix-Marseille University                                                                                         | France                                                     |
| Dhar, Avinash                  | Theoretical Physics                                                            | International Centre for Theoretical Sciences of The Tata Institute of Fundamental Research                      | India                                                      |
| Dheer, Arjun                   | PhD student in Evolutionary Ecology                                            | IZW-Berlin                                                                                                       | Germany                                                    |
| Dhiedt, Els                    | PhD student - bioscience engineering                                           | Ghent University                                                                                                 | Belgium                                                    |
| Dhillon, Jaspreet Kaur         | Assistant Professor                                                            | Sri Guru Granth Sahib World University Fatehgarh Sahib                                                           | India                                                      |
| Di Bitetti, Mario              | Principal Researcher; Ecologist                                                | National Research Council (CONICET)                                                                              | Argentina                                                  |
| Di Dario, Fabio                | Associate Professor                                                            | Federal University of Rio de Janeiro (UFRJ)                                                                      | Brazil                                                     |
| Di Filippo, Alfredo            | Associate Professor of Botany                                                  | Università della Tuscia                                                                                          | Italy                                                      |
| Di Giacomo, Adrián S.          | Researcher, Ornithology & Conservation Biology                                 | Laboratorio de Biología de la Conservación, Centro de Ecología Aplicada del Litoral (CECOAL-CONICET), Corrientes | Argentina                                                  |
| Di Marco, Gaetano              | PhD student                                                                    | Universidad Autónoma de Madrid                                                                                   | Spain                                                      |
| Di Martino, Rosaria            | Post Doctoral Fellow                                                           | Institute of Cellular Biochemistry and Biology                                                                   | Italy                                                      |
| Di Martino, Rita               | PhD Student in Microbiology                                                    | University of Lausanne                                                                                           | Switzerland                                                |
| Di Muzio, Enrico               | Researcher, meteorology                                                        | Karlsruhe Institute of Technology                                                                                | Germany                                                    |
| Di Natale, Carlo               | Msc Marine Science                                                             |                                                                                                                  | Italy                                                      |
| Diamond, Sarah                 | Assistant Professor / George B. Mayer Chair in Urban and Environmental Studies | Case Western Reserve University                                                                                  | United States of America (the)                             |



|                           |                                                                                      |                                                                          |                                                            |
|---------------------------|--------------------------------------------------------------------------------------|--------------------------------------------------------------------------|------------------------------------------------------------|
| Diamond, Miriam           | Professor, Environmental Chemistry                                                   | University of Toronto                                                    | Canada                                                     |
| Diamond, Antony           | Professor Emeritus, Wildlife Ecology Research                                        | University of New Brunswick                                              | Canada                                                     |
| DIANESE, JOSE             |                                                                                      | UNIVERSIDADE DE BRASÍLIA                                                 | Brazil                                                     |
| Diano, Matteo             | Assistant Professor of Physiology                                                    | Department of Psychology, University of Turin                            | Italy                                                      |
| Dias, António             | Engineer                                                                             |                                                                          | Portugal                                                   |
| Dias, Pedro               | Researcher, behavioral ecology                                                       | Universidad Veracruzana                                                  | Mexico                                                     |
| Dias, Stefan Ribeiro      | 'Master's degree student in Ecology and Evolution                                    | Iniversidade Federal de São Paulo - UNIFESP                              | Brazil                                                     |
| Dias dos Santos, Thiago   | Postdoctoral Scholar                                                                 | University of California, Irvine                                         | United States of America (the)                             |
| Diatta, Jean              | Agrochemistry and Environmental Biogeochemistry                                      | Poznan University of Life Sciences                                       | Poland                                                     |
| Diaz, Clara               | PhD student - mesophotic reefs                                                       | University of Plymouth                                                   | United Kingdom of Great Britain and Northern Ireland (the) |
| Diaz, Ivonne del C.       | Professor                                                                            | University of Puerto Rico at Mayaguez                                    | Puerto Rico                                                |
| Diaz, Francisca P.        | Postdoc researcher/ Ecology                                                          | Pontificia Universidad Catolica de Chile                                 | Chile                                                      |
| Diaz, Monica              | Researcher                                                                           | CONICET                                                                  | Argentina                                                  |
| Diaz, Julio               | Head of Deparment Epidemiology and Biostatistic                                      | Carlos III Institute of Health                                           | Spain                                                      |
| Diaz, Paloma              | PhD student                                                                          | Universidad Rey Juan Carlos                                              | Spain                                                      |
| DIAZ, ALEXANDER           | Educational Psychology                                                               | University of Alberta                                                    | Canada                                                     |
| Díaz, Mario               | Full Professor/Ecology                                                               | Spanish Research Council                                                 | Spain                                                      |
| Diaz Cosin, Dario         | Emeritus Professor                                                                   | Universidad Complutense                                                  | Spain                                                      |
| Diaz Gomez, Andrea Romina | Postdoc Dr biological science                                                        | University of La Plata                                                   | Argentina                                                  |
| Díaz Rubio, Gery Andrés   | PhD student in Statistical Sciences, Teaching Assistant in Statistics and Economics  | University of Bologna                                                    | Italy                                                      |
| Diaz-Aguirre, Fernando    | Marine Biologist, PhD.                                                               |                                                                          | Australia                                                  |
| Diaz-Almela, Elena        | Contracted researcher, marine ecology                                                | CEAB-CSIC                                                                | Spain                                                      |
| Diaz-Camino, Claudia      | Scientific research/ Plant Molecular Biology                                         | Universidad Nacional Autónoma de México                                  | Mexico                                                     |
| Díaz-Delgado, Ricardo     | Head of Remote Sensing and GIS Lab                                                   | Estación Biológica de Doñana-CSIC                                        | Spain                                                      |
| Díaz-Gómez, Diana Lucía   | Lead Knowledge Services                                                              | Instituto de Investigación de Recursos Biológicos Alexander von Humboldt | Colombia                                                   |
| Diaz-Sierra, Ruben        | Associate Professor of Applied Physics                                               | Universidad Nacional de Educación a Distancia UNED                       | Spain                                                      |
| Diaz-Varela, Emilio       | Associate Professor                                                                  | University of Santiago de Compostela                                     | Spain                                                      |
| Diazgranados, Mauricio    | Research Leader - Diversity & Livelihoods, Natural Capital & Plant Health Department | Royal Botanic Gardens, Kew                                               | United Kingdom of Great Britain and Northern Ireland (the) |
| Dibella, Emiliano         | Licenciado en Sociología, Investigador en Agroecología                               | INTA (Instituto Nacional de Tecnología Agropecuaria)                     | Argentina                                                  |
| Dickens, Jeremy           | Ornithologist, Evolutionary Biologist and Ecologist                                  | Fundación Para La Tierra                                                 | South Africa                                               |
| Dickie, Ian               | Professor of Microbial Ecology                                                       | School of Biological Sciences, University of Canterbury                  | New Zealand                                                |
| Dickie, Melanie           | Ecology - Research Assistant                                                         | Alberta Biodiversity Monitoring Institute                                | Canada                                                     |
| Dickinson, Katharine      | Professor of Plant Ecology                                                           | University of Otago                                                      | New Zealand                                                |
| Dickinson, Janis          | Professor Emerita in Department of Natural Resources                                 | Cornell University                                                       | United States of America (the)                             |
| Dickinson, Federico       | Senior Researcher                                                                    | Department of Human Ecology, Cinvestav                                   | Mexico                                                     |

|                           |                                                       |                                                                                                                           |                                                            |
|---------------------------|-------------------------------------------------------|---------------------------------------------------------------------------------------------------------------------------|------------------------------------------------------------|
| Dickinson, Robert         | Lecturer, Physics                                     | University of Manchester                                                                                                  | United Kingdom of Great Britain and Northern Ireland (the) |
| Dickman, Amy              | Kaplan Senior Research Fellow                         | University of Oxford                                                                                                      | United Kingdom of Great Britain and Northern Ireland (the) |
| Dickman, Christopher      | Professor in Ecology                                  | The University of Sydney                                                                                                  | Australia                                                  |
| Dickman, Alan             | professor emeritus, environmental studies and biology | University of Oregon                                                                                                      | United States of America (the)                             |
| Dickson, Christopher      | PhD Graduate, Astrophysics                            | Cardiff University                                                                                                        | United Kingdom of Great Britain and Northern Ireland (the) |
| Didier, ROGUET            | curator                                               | Conservatoire et Jardin botaniques de Genève                                                                              | Switzerland                                                |
| Didry, Morgane            | Marine biologist                                      | AMU - MIO                                                                                                                 | France                                                     |
| Diele-Viegas, Luisa Maria | Postdoctoral researcher                               | Federal University of Bahia                                                                                               | Brazil                                                     |
| Dierking, Jan             | Marine Ecology                                        | GEOMAR Helmholtz Centre for Ocean Research Kiel                                                                           | Germany                                                    |
| Diesing, Markus           | Marine Geologist                                      |                                                                                                                           | Norway                                                     |
| Dietemann, Vincent        | Senior Scientist                                      | Agroscope                                                                                                                 | Switzerland                                                |
| Dietrich, Kim             | Biologist                                             |                                                                                                                           | United States of America (the)                             |
| Dietterich, Thomas        | Professor (Emeritus) of Computer Science              | Oregon State University                                                                                                   | United States of America (the)                             |
| Dietzel, Andreas          | PhD candidate                                         | James Cook University                                                                                                     | Australia                                                  |
| Dievart, Anne             | Researcher Biology                                    | CIRAD                                                                                                                     | France                                                     |
| Díez Díaz, Verónica       |                                                       | Museum für Naturkunde - Leibniz Institute for Evolution and Biodiversity Science Invalidenstrasse 43 10115 Berlin Germany | Germany                                                    |
| Dijkstra, Henk A.         | Professor of Physics                                  | Utrecht University                                                                                                        | Netherlands (the)                                          |
| Dill, Lawrence            | Prodeessor Emeritus, Behavioural Ecology              | Simon Fraser University                                                                                                   | Canada                                                     |
| Dilworth, Jenna           | MSc Student                                           | University of Miami - Rosenstiel School of Marine and Atmospheric Science                                                 | United States of America (the)                             |
| Dima, Bálint              | Researcher in mycology                                | Department of Plant Anatomy, Institute of Biology, Eötvös Loránd University                                               | Hungary                                                    |
| Dimitras, Elisabeth       | Fellow researcher                                     | University of the Aegean / Université Montpellier 2                                                                       | Greece                                                     |
| Dimitriu, Tatiana         | post-doctoral researcher in evolutionary biology      | University of Exeter                                                                                                      | United Kingdom of Great Britain and Northern Ireland (the) |
| Dimitriu, Andrés          | Profesor, communication, political ecology            | Universidad Nacional del Comahue                                                                                          | Argentina                                                  |
| Dimov, Luben              | Forestry                                              | University of Vermont                                                                                                     | United States of America (the)                             |
| Dines, James              |                                                       | Natural History Museum of Los Angeles County                                                                              | United States of America (the)                             |
| Ding, Pisheng             | Assistant Professor of Mathematics                    | Illinois State University                                                                                                 | United States of America (the)                             |
| Diniz, Pedro              |                                                       | Universidade Vila Velha                                                                                                   | Brazil                                                     |
| Dinsdale, Adam            |                                                       | Monash University                                                                                                         | Australia                                                  |
| Dion, Iris-amata          | PhD student                                           | Cnrm                                                                                                                      | France                                                     |
| Dion, Pierre-Paul         | PhD student, plant biology                            | Laval University                                                                                                          | Canada                                                     |
| Diongue Niang, Aïda       | Adviser / Meteorology                                 | ANACIM                                                                                                                    | Senegal                                                    |
| Diorio, Luis              | Dr. Cs. Biológicas                                    | FCEyN, UBA                                                                                                                | Argentina                                                  |
| Dipierri, Ana Alicia      | PhD researcher                                        | Université libre de Bruxelles                                                                                             | Belgium                                                    |
| Diplock, Nathan           | PhD Student, Plant Biology                            | University of California, Berkeley                                                                                        | United States of America (the)                             |

|                                        |                                                                    |                                         |                                                            |
|----------------------------------------|--------------------------------------------------------------------|-----------------------------------------|------------------------------------------------------------|
| Dirksen, Philipp                       | Evolutionary Ecologist                                             | University of Mainz                     | Germany                                                    |
| DiRuggiero, Jocelyne                   | Professor/microbiology                                             | Johns Hopkins University                | United States of America (the)                             |
| Dirzo, Rodolfo                         | Professor                                                          | Stanford University                     | United States of America (the)                             |
| Dismukes, G. Charles                   | Distinguished Professor                                            | Rutgers University                      | United States of America (the)                             |
| Ditchfield, Arlene                     | Senior research associate                                          | Scottish Association for Marine Science | United Kingdom of Great Britain and Northern Ireland (the) |
| Ditengou, Franck                       | Biologist                                                          | University of Freiburg                  | Germany                                                    |
| Dittmer, Jessica                       | Biologist/Ecologist                                                | University of Milan                     | Italy                                                      |
| Dittrich, Carolin                      | Doctoral researcher in Evolutionary Ecology                        | Museum für Naturkunde Berlin            | Germany                                                    |
| Dittrich, Vinícius Antonio de Oliveira | Professor, Botany                                                  | Universidade Federal de Juiz de Fora    | Brazil                                                     |
| Dittrich, Jens                         | Professor, Computer Science, Big Data Analytics                    | Saarland University                     | Germany                                                    |
| Dixon, Emily                           | Horticulture                                                       | Oregon State University                 | United States of America (the)                             |
| Dixon, Nicholas                        | Distinguished Professor, Biological Chemistry                      | University of Wollongong                | Australia                                                  |
| Dixon, K.C.                            | Geographer                                                         |                                         | United States of America (the)                             |
| Dizengremel, Pierre                    | Professor emeritus in plant physiology                             | Université de Lorraine                  | France                                                     |
| Djurfeldt, Mikael                      | Researcher in Neuroinformatics                                     | KTH                                     | Sweden                                                     |
| Dlamini, Wisdom                        | Coordinator: Centre for Climate Change and Sustainability Research | University of Eswatini                  | Swaziland                                                  |
| Dlouha, Jana                           | Researcher - Tree biomechanics                                     |                                         | France                                                     |
| Dlouhá, Jana                           | researcher                                                         | Charles University Environment Centre   | Czech Republic (the)                                       |
| Dlouhý, Jiří                           | Head of department/Environmental education                         | Charles University Environment Centre   | Czech Republic (the)                                       |
| Dmuchowski, Wojciech                   | environmental pollution/ professor                                 | Institute of Environmental Protection   | Poland                                                     |
| do Carmo Loch, Vivian                  | PhD student in Agroecology                                         | State University of Maranhão            | Brazil                                                     |
| Dobbelaar, Emiel                       | PhD Student in Chemistry                                           | TU Kaiserslautern                       | Germany                                                    |
| Dobbs, Cynnamon                        | Associate professor                                                | Universidad mayor                       | Chile                                                      |
| Döbert, Timm                           | Postdoctoral Fellow                                                | University of Alberta                   | Canada                                                     |
| Dobler, Ralph                          | Postdoc in Evolution and Ecology                                   | TU Dresden                              | Germany                                                    |
| Dobrijevic, Michel                     | Researcher/teacher                                                 | Laboratoire d'Astrophysique de Bordeaux | France                                                     |
| Dobrovolski, Ricardo                   | Professor of Ecology and Conservation                              | Universidade Federal da Bahia           | Brazil                                                     |
| Dobson, Andy                           | Professor                                                          | Princeton University                    | United States of America (the)                             |
| Docherty, Teegan                       |                                                                    | Durham University                       | United Kingdom of Great Britain and Northern Ireland (the) |
| Doci, Edina                            | Associate Professor                                                | Université catholique de Louvain        | Belgium                                                    |
| Docquier, David                        | Postdoc researcher                                                 | UCLouvain                               | Belgium                                                    |
| Doda, Tomy                             | PhD student, Environmental Sciences                                | Eawag                                   | Switzerland                                                |
| Dodd, Jennifer                         | Lecturer - Ecology & conservation                                  | Edinburgh Napier University             | United Kingdom of Great Britain and Northern Ireland (the) |
| Dode, Coralie                          | Hydrogeology                                                       |                                         | France                                                     |
| Dodkin, Christina                      | Research Director/Ethologist                                       | Animal Defenders International          | United Kingdom of Great Britain and Northern Ireland (the) |
| Dodson, Jenna                          | Associate Researcher                                               | University of Gothenburg                | Sweden                                                     |

|                                |                                               |                                                                                                                    |                                |
|--------------------------------|-----------------------------------------------|--------------------------------------------------------------------------------------------------------------------|--------------------------------|
| Doelsch, Emmanuel              | Researcher - Environmental Science            | CIRAD                                                                                                              | France                         |
| Doering-Arjes, Peer            | Biologist                                     |                                                                                                                    | Germany                        |
| Doherty, John                  | PhD student, Earth Sciences                   | The University of Hong Kong                                                                                        | Hong Kong                      |
| Doherty, Rachel                | Senior Researcher                             | Leiden Institute of Physics, Leiden University                                                                     | Netherlands (the)              |
| Doherty, Tim                   | Research Fellow                               | Deakin University                                                                                                  | Australia                      |
| Dohet, Loïc                    | PhD, Ecology                                  | Université Libre de Bruxelles                                                                                      | Belgium                        |
| Dohrmann, Martin               | Postdoctoral Researcher/Evolutionary Biology  | Ludwig-Maximilians-Universität München                                                                             | Germany                        |
| Doi, Hideyuki                  | Associate Professor                           | University of Hyogo                                                                                                | Japan                          |
| Dolak, Lukas                   | Researcher, Historical climatology            |                                                                                                                    | Czech Republic (the)           |
| Dolce, Luciano                 | Postdoctoral Fellow in Structural Biology     | EMBL                                                                                                               | France                         |
| Dolder, Mary Anne Heidi        | Collaborating Professor                       | Biology Institute, State university of Campinas                                                                    | Brazil                         |
| Dole, Dr Shrikar               | Founder & CEO                                 | SDG Foundation                                                                                                     | India                          |
| Dolf, Matt                     | Director, UBC Wellbeing                       | University of British Columbia                                                                                     | Canada                         |
| Doligalska, Maria              |                                               | University of Warsaw                                                                                               | Poland                         |
| DOLIGEZ, Blandine              | Researcher in Evolutionary Ecology            | CNRS                                                                                                               | France                         |
| Domanski, Dominik              | Ph.D. / Biochemistry                          | Institute of Biochemistry & Biophysics                                                                             | Poland                         |
| Domergue, Frédéric             | Plant Biology Reseracher                      | CNRS                                                                                                               | France                         |
| Domi, Alba                     | PhD in astroparticle                          | University of Genova, INFN-Genova, CPPM-Marseille                                                                  | Italy                          |
| Domingo, Esteban               | Professor of Virology                         | Spanish Reserach Council                                                                                           | Spain                          |
| Domingues, Tomas               |                                               | University of São Paulo                                                                                            | Brazil                         |
| Dominguez, Eduardo             | Researcher and Professor                      | Instituto de Biodiversidad Neotropical CONICET and Facultad de Ciencias Naturales, Universidad Nacional de Tucuman | Argentina                      |
| Dominguez, Cesar               | Professor                                     | Instituto de Ecología, Universidad Nacional autónoma de México                                                     | Mexico                         |
| Dominguez, Cesar A.            | Full Professor                                | Institute of Ecology, UNAM                                                                                         | Mexico                         |
| Domínguez, Marta               | MSc in Marine Biological Resources            | University of Ghent                                                                                                | Belgium                        |
| Domínguez, Yoannis             | Professor, Botany                             | São Paulo State Univesity - UNESP                                                                                  | Brazil                         |
| Domínguez, Jorge               | Professor of Zoology                          | Universidade de Vigo                                                                                               | Spain                          |
| Domínguez-Sarmiento, Christian | Assistant Professor                           | Instituto de Ciencias de la Atmósfera y Cambio Climático, UNAM                                                     | Mexico                         |
| DOMMANGET, Fanny               | Researcher in plant invasions                 | IRSTEA                                                                                                             | France                         |
| Doña, Jorge                    | PhD                                           | University of Illinois at Urbana-Champaign                                                                         | United States of America (the) |
| Doña Monzo, Carolina           | Postdoctoral researcher                       | University of València                                                                                             | Spain                          |
| Donadio-Andrei, Sandrine       | Doctor in Biotech                             |                                                                                                                    | France                         |
| Donald, Julian                 | Postdoctoral Researcher                       | Université Toulouse 3 Paul Sabatier                                                                                | France                         |
| Donald, Kirsten                | Research Fellow, Evolutionary Biology         | University of Otago                                                                                                | New Zealand                    |
| DoNascimento, Carlos           | Researcher and curator of the Fish Collection | Instituto de Investigación de Recursos Biológicos Alexander von Humboldt                                           | Colombia                       |
| Donati, Elisa                  | Master's student in ecological science        | University of Parma                                                                                                | Italy                          |
| Donato Gianeti, Michel         | laboratory technician                         | Universidade de São Paulo                                                                                          | Brazil                         |
| Donazar, Jose Antonio          | Research Professor                            | Spanish Council for Reseech (CSIC)                                                                                 | Spain                          |

|                                  |                                                        |                                                                            |                                                            |
|----------------------------------|--------------------------------------------------------|----------------------------------------------------------------------------|------------------------------------------------------------|
| Done, Terry                      | Associate Fellow                                       | Australian Institute of Marine Science                                     | Australia                                                  |
| Dongre, Pooja                    | PhD Student                                            | University of Lausanne                                                     | Switzerland                                                |
| Donley, Nathan                   | senior scientist                                       | center for biological diversity                                            | United States of America (the)                             |
| Donner, Helena                   | PhD candidate, Biology                                 | Wageningen University and Research                                         | Netherlands (the)                                          |
| Donnici, Sandra                  | Researcher                                             | Consiglio Nazionale delle Ricerche                                         | Italy                                                      |
| Donoghue, Joseph                 | Geologist                                              | University of Central Florida                                              | United States of America (the)                             |
| Donoso, David A.                 | Assistant Professor                                    | Escuela Politécnica Nacional                                               | Ecuador                                                    |
| Donoso, Pablo                    | Professor                                              | Universidad Austral de Chile                                               | Chile                                                      |
| Dool, Serena                     | Postdoc                                                | Montpellier                                                                | France                                                     |
| Doran, Carolina                  | Postdoc                                                | Leibniz Institute of Freshwater Ecology & Inland Fisheries                 | Germany                                                    |
| Doré, Thierry                    | Agronomist                                             | AgroParisTech                                                              | France                                                     |
| Dorf, Marcel                     | Atmospheric Chemistry and Physics                      | Max-Planck Institute for Chemistry                                         | Germany                                                    |
| Dori, Dov                        | Professor, Systems and Information Engineering         | MIT and Technion                                                           | Israel                                                     |
| Dori-Hacohen, Shiri              | CEO & Cofounder (Computer Science)                     | AuCoDe                                                                     | United States of America (the)                             |
| Doria, Vanessa                   | Bióloga/Docente universitaria                          | Facultad de Ciencias Exactas y Naturales, Universidad Nacional de Asunción | Paraguay                                                   |
| Dorian, Lefebvre                 | Engineer Assistant                                     | CNRS                                                                       | France                                                     |
| Dorin, Bruno                     | Senior Researcher (Economics)                          | CIRAD                                                                      | France                                                     |
| Dörler, Daniel                   | Senior Scientist, Ecology                              | University of Natural Resources and Life Sciences, Vienna                  | Austria                                                    |
| Dormoy-Boulanger, Jade           | Biology, climate change, cyanobacteria                 | UQAM                                                                       | Canada                                                     |
| Dornbos Jr., David               | Professor, Plant Physiology                            | Calvin University                                                          | United States of America (the)                             |
| Dorner, Fabian                   | Transport research                                     | Technische Universität Wien                                                | Austria                                                    |
| Dörrer, Nils                     | B. Sc. Computer Science                                | Georg August University Göttingen                                          | Germany                                                    |
| Dorrington, Joshua               | PhD Student in Atmospheric Physics                     | University of Oxford                                                       | United Kingdom of Great Britain and Northern Ireland (the) |
| Dorsey, John                     | Professor Emeritus, Marine Environmental Science       | Loyola Marymount University                                                | United States of America (the)                             |
| dos Santos, Antonio M.           | Researcher, Neutron scattering                         |                                                                            | United States of America (the)                             |
| dos Santos, Alex                 | PhD Oceanography                                       | Laboratoire d'Aérodologie                                                  | France                                                     |
| dos Santos, Eva                  | Post-doc in Astroparticle Physics                      | Institute of Physics - Czech Academy of Sciences                           | Czech Republic (the)                                       |
| Dos Santos, Iracenir             | Professor                                              | Federal University of Western Para                                         | Brazil                                                     |
| Dos Santos, Andre Cordeiro Alves | Associate Professo in Limnology                        | Universidade Federal de São Carlos                                         | Brazil                                                     |
| Dössegger, Lukas                 |                                                        | EAWAG                                                                      | Switzerland                                                |
| Dossier, Julien                  | Carbon Neutrality Expert                               | Quattrolibri                                                               | France                                                     |
| Dostie, Marcus                   | Instructor III Department of Geography and Environment | University of Lethbridge                                                   | Canada                                                     |
| Dottori, Marcelo                 | Assistant Progegessor                                  | University of São Paulo                                                    | Brazil                                                     |
| Douady, Christophe               | Professor Evolutionary Biology                         | Université de Lyon                                                         | France                                                     |
| DOUBLET, Violette                | PhD Student                                            | INRA - French National Institute for Agricultural Research.                | France                                                     |

|                               |                                                             |                                                                                                                  |                                                               |
|-------------------------------|-------------------------------------------------------------|------------------------------------------------------------------------------------------------------------------|---------------------------------------------------------------|
| Doucette, Lisa                | Resource Scientist (Provincial Biologist)                   | Nova Scotia Department of Lands and Forestry,<br>Wildlife Division                                               | Canada                                                        |
| Dougherty, Thomas             | Retired environmental scientist                             |                                                                                                                  | Canada                                                        |
| Douglas, Hannah               | Psychology                                                  | Macquarie University                                                                                             | Australia                                                     |
| Douine, Maylis                | Professor in Public Health                                  | Centre Hospitalier de Cayenne                                                                                    | France                                                        |
| Doulcier, Guilhem             | Grad Student                                                | École normale supérieure                                                                                         | France                                                        |
| Doumas, Patrick               | Senior Scientist                                            | INRA                                                                                                             | France                                                        |
| DOUMBIA, Lassina              | One Health focal point                                      | Laboratory of Applied Molecular Biology                                                                          | Mali                                                          |
| Dourado, Isabela              | Botany                                                      | UFU                                                                                                              | Brazil                                                        |
| Dourou, Marianna              | Post doctoral researcher                                    | University of Milan                                                                                              | Italy                                                         |
| doutrelant, claire            | Evolutionary Biologist                                      | CNRS                                                                                                             | France                                                        |
| Dovciak, Martin               | Associate Professor in Plant Ecology                        | State University of New York, College of<br>Environmental Science and Forestry (SUNY ESF),<br>Syracuse, New York | United States of America (the)                                |
| Dove, Alistair                | Vice President of Research & Conservation                   | Georgia Aquarium                                                                                                 | United States of America (the)                                |
| Dovey, Liz                    | Honorary Lecturer                                           | Fenner School of Environment and Science, Australian<br>National University                                      | Australia                                                     |
| Dow, Leslie                   | Consultant, Biomedical Devices & Biotechnology              | Leslie Dow Consulting LLC                                                                                        | United States of America (the)                                |
| Dowler, Robert                | Professor of Biology                                        | Angelo State University                                                                                          | United States of America (the)                                |
| Dowling, Caroline             | PhD Candidate in Plant Genetics                             | University College Dublin                                                                                        | Ireland                                                       |
| Downey, Phillip               | Mechanical Engineer                                         | Dana Incorporated                                                                                                | United States of America (the)                                |
| DOWNEY, PHILLIP               | MECHANICAL ENGINEER                                         | DANA CORP                                                                                                        | United States of America (the)                                |
| Downs, Thomas                 | Junior Doctor                                               | Betsi Cadwaladr University Health Board                                                                          | United Kingdom of Great Britain<br>and Northern Ireland (the) |
| Downs, Colleen                | Professor                                                   | University of KwaZulu-Natal                                                                                      | South Africa                                                  |
| Doyle, Tristan                | PhD Student                                                 | Lancaster University                                                                                             | United Kingdom of Great Britain<br>and Northern Ireland (the) |
| Doyle, Paul                   | Hydrotechnical Engineer                                     | BC Rivers Consulting                                                                                             | Canada                                                        |
| Doyle, Emma                   | Biosciences Research                                        | University of Exeter                                                                                             | United Kingdom of Great Britain<br>and Northern Ireland (the) |
| Doyle, Allen                  | Chemical Oceanography                                       | University of California                                                                                         | United States of America (the)                                |
| Doyle, Mary Ann               | Retired, Director, Associate Professor Teacher<br>Education | Earth in Common Design, LLC                                                                                      | United States of America (the)                                |
| Doz, Cyprien                  | PhD in Statistics                                           | University Paris Saclay                                                                                          | France                                                        |
| Dr. Grüttner, Astrid          | Botany                                                      |                                                                                                                  | Germany                                                       |
| Dr. habil. Liste, Hans-Holger | Soil Ecologist                                              | ECOSFAIR                                                                                                         | Germany                                                       |
| Dr. Kant, Roswitha            | Philosopher                                                 | Studienseminar für Gymnasien Wiesbaden                                                                           | Germany                                                       |
| Dr. Lampa, Simone             | Ecologist                                                   | Freelancer                                                                                                       | Germany                                                       |
| Dr. Mucha, Klaus              | Diplom-Psychologe                                           | FOM Hochschule für Ökonomie und Management,<br>DIPLOMA Hochschule                                                | Germany                                                       |
| Dr. Rittmann, Simon           | Senior Scientist/Microbiology                               | Universität Wien                                                                                                 | Austria                                                       |
| Dr. Tischer, Sabine           | Soil Biology                                                | recent                                                                                                           | Germany                                                       |

|                              |                                                          |                                                                                |                                                            |
|------------------------------|----------------------------------------------------------|--------------------------------------------------------------------------------|------------------------------------------------------------|
| Dr. Zippel, Elke             | Curator Dahlem Seed Bank                                 | Botanic Garden and Botanic Museum Berlin                                       | Germany                                                    |
| Dr.med. Stratmann, Matthias  | General Practitioner                                     | Hausarztzentrum Werther                                                        | Germany                                                    |
| Dr.med.Fehlings, Franz-Josef | Anaesthetist                                             | Hospital Loretto Krankenhaus Freiburg                                          | Germany                                                    |
| Dr.Rusche, Jochen            | Chemistry                                                | person of private means                                                        | Germany                                                    |
| Drabik, Pascal               | Scientific Officer                                       |                                                                                | Belgium                                                    |
| Drago, Andrea                | PhD student in Mathematics                               | Rome University "La Sapienza"                                                  | Italy                                                      |
| Drago, Filippo               | Employee                                                 | ISTituto Italiano di Tecnologia                                                | Italy                                                      |
| Drake, David                 | Marine Geology                                           | USGS                                                                           | United States of America (the)                             |
| Drake, Donald                | Professor                                                | University of Hawaii                                                           | United States of America (the)                             |
| Drange, Helge                | Professor, Oceanography                                  | University in Bergen                                                           | Norway                                                     |
| Draper, John                 | Assistant Professor (Public Administration)              | Khon Kaen University                                                           | Thailand                                                   |
| Draper, Isabel               | Associate Professor of Botany                            | Universidad Autónoma de Madrid                                                 | Spain                                                      |
| Draper, Olga                 | Research Safety Specialist; Molecular and Cell Biologist | University of California, Berkeley                                             | United States of America (the)                             |
| Draper, David                | Post Doc Researcher                                      | ce3c - University of Lisbon                                                    | Portugal                                                   |
| Draveng, Flora               | Biologist                                                |                                                                                | Sweden                                                     |
| Dray, Stéphane               | Senior researcher                                        | Laboratoire de Biométrie et Biologie Evolutive, CNRS UMR 5558, Université Lyon | France                                                     |
| Drayton, Brian               | Center Co-Director                                       | TERC                                                                           | United States of America (the)                             |
| Dreber, Niels                | Ecologist                                                | University of Göttingen                                                        | Germany                                                    |
| Drechsel, Emanuel J.         | Professor, Interdisciplinary Studies (retired)           | University of Hawai 'i at Mānoa                                                | United States of America (the)                             |
| Drechsel, Susanne            | Meteorologist                                            | Zentralanstalt für Meteorologie und Geodynamik                                 | Austria                                                    |
| Dreier, Thomas               | Professor                                                | University Duisburg-Essen                                                      | Germany                                                    |
| Dresmann, Horst              | research assistant / geology                             | Applied and Environmental Geology, University of Basel                         | Switzerland                                                |
| Dreujou, Elliot              | PhD candidate in Oceanography                            | Université du Québec à Rimouski                                                | Canada                                                     |
| Drevensek, Stephanie         | Biologist                                                | INRA                                                                           | France                                                     |
| Drewnick, Frank              | Scientist (Atmospheric Sciences)                         | MPI for Chemistry, Mainz                                                       | Germany                                                    |
| Drigo, Barbara               | Lecturer Microbial Ecology                               | University of South Australia                                                  | Australia                                                  |
| Drijkoningen, Philip         | Geologist                                                | Retired                                                                        | Belgium                                                    |
| Drimmel, Ronald              | Research astronomer                                      | INAF                                                                           | Italy                                                      |
| Dripps, Weston               | Professor of Earth and Environmental Sciences            | Furman University                                                              | United States of America (the)                             |
| Driscoll, Paul               | Staff Scientist/Metabolomics                             | The Francis Crick Institute                                                    | United Kingdom of Great Britain and Northern Ireland (the) |
| Dror, Hila                   | Phd candidate                                            | University of Haifa                                                            | Israel                                                     |
| Drost, Annemieke             | Aquatic ecology                                          | NIOO-KNAW                                                                      | Netherlands (the)                                          |
| Droual, Gabin                | Engineer                                                 | IFREMER                                                                        | France                                                     |
| Drouet, Emmanuel             | Professor in UGA France, PhD                             | UGA Université Grenoble Alpes                                                  | France                                                     |
| Drouilly, Romain             | PhD computer science                                     |                                                                                | France                                                     |
| Drouilly, Marine             | Wildlife biologist                                       | Institute for Communities and Wildlife in Africa                               | South Africa                                               |
| Droujko, Jessica             | Mechanical Engineer                                      | Leibniz-Institute of Freshwater Ecology and Inland Fisheries                   | Canada                                                     |

|                                |                                                           |                                                                   |                                                            |
|--------------------------------|-----------------------------------------------------------|-------------------------------------------------------------------|------------------------------------------------------------|
| Drozak, Jakub                  | assistant professor, biochemistry                         | Uniwersity of Warsaw                                              | Poland                                                     |
| Drummond, Revel                | Molecular Biology                                         |                                                                   | New Zealand                                                |
| Drummond, Alexei               | Professor of Computational Biology                        | University of Auckland                                            | New Zealand                                                |
| Drury, Stephen                 | Security Manager and Exhibit Development Intern           | Florida Museum                                                    | United States of America (the)                             |
| Drury, Jonathan                | Assistant Professor                                       | Durham University                                                 | United Kingdom of Great Britain and Northern Ireland (the) |
| du Pontavice, Hubert           | Marine Ecology                                            | Agrocampus Ouest                                                  | France                                                     |
| du Preez, Derek                | Director of the School of Environmental Sciences          | Nelson Mandela Metropolitan University                            | South Africa                                               |
| Duarte, Liliana                | Researcher                                                | Instituto Politécnico de Coimbra                                  | Portugal                                                   |
| Duarte, Ana                    |                                                           | University of Exeter                                              | United Kingdom of Great Britain and Northern Ireland (the) |
| Duarte, Renato                 | Postdoctoral researcher in computational neuroscience     | Forchungszentrum Juelich                                          | Germany                                                    |
| Duarte, Bernardo               | Assistant Researcher                                      | MARE - Marine and Environmental Sciences Centre                   | Portugal                                                   |
| Duarte de Paula Costa, Micheli | Research Fellow                                           | Deakin University - Blue Carbon Lab                               | Australia                                                  |
| Dubard, Emilie                 | new energies' devices                                     | Centre National de la Recherche Scientifique                      | France                                                     |
| DuBay, Shane                   | Assistant Professor                                       | University of Michigan                                            | United States of America (the)                             |
| Dubois, Gregoire               | Biodiversity Conservation                                 | Joint Research Centre of the European Commission                  | Italy                                                      |
| Dubois, Jessica                | Researcher                                                | Inserm                                                            | France                                                     |
| Dubois, Dianne                 | Staff Scientist                                           | Center for Biological Diversity                                   | United States of America (the)                             |
| DuBois, Christopher            | Restoration Coordinator                                   | The Nature Conservancy                                            | United States of America (the)                             |
| Dubos, Nicolas                 | Researcher in Ecology                                     | MNHN                                                              | France                                                     |
| Duca, Charles                  | Professor / Ecology and Conservation Biology              | Universidade Vila Velha                                           | Brazil                                                     |
| Duca, Edward                   | Lecturer in Science and Innovation Communication          | University of Malta                                               | Malta                                                      |
| Duchardt, Courtney             | Rangeland Avian Ecologist                                 | University of Wyoming                                             | United States of America (the)                             |
| Ducharne, Agnès                | Hydrologist, senior scientist                             | CNRS, Institut Pierre-Simon Laplace                               | France                                                     |
| Duchatelet, Laurent            | PhD Student                                               | Université catholique de Louvain                                  | Belgium                                                    |
| Duchelle, Amy                  | Senior Scientist                                          | Center for International Forestry Research (CIFOR)                | Indonesia                                                  |
| Duchicela, Sisimac             | PhD Candidate/Department of Geography and the Environment | University of Texas-Austin                                        | United States of America (the)                             |
| Duckworth, J. W.               | Wildlife Surveyor and Conservation Advisor                | J. W. Duckworth Ltd                                               | United Kingdom of Great Britain and Northern Ireland (the) |
| Duckworth, Chris               | Astrophysics PhD student                                  | St Andrews University, Scotland & Flatiron Institute              | United Kingdom of Great Britain and Northern Ireland (the) |
| Ducotterd, Charlotte           | PhD Student in Life Sciences                              | University of Lausanne                                            | Switzerland                                                |
| DUCROS, Delphine               | PhD student in ecology and conservation biology           | Muséum National d'Histoire Naturelle (Paris)                      | France                                                     |
| Duda, Matthew                  | Paleolimnology                                            | Queen's University                                                | Canada                                                     |
| Dudley, Bernard                | Environmental Chemist                                     | Centre for Ecology and Hydrology                                  | United Kingdom of Great Britain and Northern Ireland (the) |
| Duffaut, Carine                | PhD, Project Manager (Epidemiology and public health)     | Inserm (French National Institute of Health and Medical Research) | France                                                     |
| Duffy, Deanna                  | Spatial Scientist                                         | CHarles Sturt University                                          | Australia                                                  |
| Duffy, David                   | Gerrit Parmule Wilder Chair in Botany                     | University of Hawaii Manoa                                        | United States of America (the)                             |



|                        |                                                               |                                                                            |                                                            |
|------------------------|---------------------------------------------------------------|----------------------------------------------------------------------------|------------------------------------------------------------|
| DUFFY, PHILIP          | President and Executive Director                              | Woods Hole Research Center                                                 | United States of America (the)                             |
| Duflot, Rémi           | Ecology                                                       | Jyväskylä University, Finland                                              | Finland                                                    |
| DUFLOT, Denis          | Associate Professor, Physics                                  | Université de Lille, Faculté des Sciences et Technologies, PhLAM           | France                                                     |
| Dufour, Javier         | Professor / Chemical and Environmental Engineering            | Rey Juan Carlos University                                                 | Spain                                                      |
| Dufour, Pauline Céline | PhD candidate, Climate change biology/conservation physiology | The university of Hong Kong                                                | Hong Kong                                                  |
| Dufour, Pauline        | PhD student in Conservation biology                           | The University of Hong Kong                                                | Hong Kong                                                  |
| Duft, Denis            | Staff Scientist / Atmospheric Science                         | Karlsruhe Institute of Technology                                          | Germany                                                    |
| Dugar, Gaurav          | Postdoc                                                       | University of Amsterdam                                                    | Netherlands (the)                                          |
| Duggan, Seána          | Research Associate, Microbiology                              | University of Bristol                                                      | United Kingdom of Great Britain and Northern Ireland (the) |
| Duggan, Ciara          | Biologist                                                     | n/a                                                                        | Ireland                                                    |
| Dugon, Michel          | Principal Investigator / Zoology                              | National University of Ireland Galway                                      | Ireland                                                    |
| Duhaime, Melissa       | Professor, Ecology and Evolutionary Biology                   | University of Michigan                                                     | United States of America (the)                             |
| Duinslaeger, Nick      | PHD                                                           | The Catalan Institute for Water Research                                   | Spain                                                      |
| Duistermaat, Leni      | Researcher                                                    | Naturalis Biodiversity Center                                              | Netherlands (the)                                          |
| Dülgeroğlu, Canan      | phd student                                                   | Akdeniz University                                                         | Turkey                                                     |
| Dulias, Katharina      | Postdoc in Palaeogenetics                                     | Technische Universität Braunschweig                                        | Germany                                                    |
| Dullinger, Iwona       | Global Change Ecology                                         | University of Vienna                                                       | Austria                                                    |
| Dumas, Marc            | Physician, Chief Medical Officer                              | Copper River native Association                                            | United States of America (the)                             |
| DUMAS, Christine       | Associate Professor                                           | University of Strasbourg                                                   | France                                                     |
| DUMORTIER, PIERRE      |                                                               | University of Liege                                                        | Belgium                                                    |
| Duncan, James          | Director                                                      | Discover Owls                                                              | Canada                                                     |
| Dunham, Amy            | Associate Professor                                           | Rice University                                                            | United States of America (the)                             |
| Dunham, Alistair       | Bioinformatics                                                | EMBL-EBI                                                                   | United Kingdom of Great Britain and Northern Ireland (the) |
| Dunker, Susanne        | Working group leader - Imaging Flow Cytometry                 | Helmholtz-Centre for Environmental Research                                | Germany                                                    |
| Dunn, Christopher      | Executive Director                                            | Cornell Botanic Gardens                                                    | United States of America (the)                             |
| Dunn, Sarah            | Hydrologist                                                   | US Geological Survey                                                       | United States of America (the)                             |
| Dünner, Camila         | Veterinarian, Conservation Medicine PhD student               | Andrés Bello University                                                    | Chile                                                      |
| Dunshea, Glenn         | Marie Curie Research Fellow                                   | Globe Institute, University of Copenhagen                                  | Denmark                                                    |
| Dunwiddie, Peter       | Ecologist                                                     | University of Washington                                                   | United States of America (the)                             |
| Dupas, Stéphane        | Research scientist biology                                    | Institut de recherche pour le développement                                | France                                                     |
| Duperat, Marine        | PhD Student, forest sciences                                  | Laval university                                                           | Canada                                                     |
| Duponchel, Sarah       | researcher in virology                                        | Max Planck Institute for Medical research                                  | Germany                                                    |
| Dupont, Etienne        | Nuclear Physics                                               | CSNSM, CNRS and université Paris-Saclay                                    | France                                                     |
| Dupouey, Jean-Luc      | ecology                                                       |                                                                            | France                                                     |
| Dupré, Gabriel         | PhD student                                                   | INRA                                                                       | France                                                     |
| Dupressoir, Thierry    | Professor Virology                                            | Ecole Pratique des Hautes Etudes -PSL University (Life and Earth Sciences) | France                                                     |
| Dupuy, Guillaume       | Student in Marine Biology                                     | University of Ghent (UGent)                                                | France                                                     |

|                       |                                                            |                                                                           |                                                            |
|-----------------------|------------------------------------------------------------|---------------------------------------------------------------------------|------------------------------------------------------------|
| Durall, Daniel        | Associate Professor                                        | UBC Okanagan                                                              | Canada                                                     |
| Duram, Leslie         | Professor, Environmental Geography                         | Southern Illinois University                                              | United States of America (the)                             |
| Duran, Adrien         | PhD student in immunology                                  | University of Bordeaux                                                    | France                                                     |
| Durand, Jean-Baptiste | Researcher in Neurobiology                                 | CNRS                                                                      | France                                                     |
| Durand, John          | Research Scientist, Estuarine Ecology                      | University of California, Davis                                           | United States of America (the)                             |
| Durand, Jacques       | chercheur Neurobiologie                                    | CNRS                                                                      | France                                                     |
| Durbecq, Aure         | phd student in Biology and Ecology                         | IMBE Avignon University                                                   | France                                                     |
| Düren, Michael        | Professor for Physics                                      | Justus-Liebig-University Giessen                                          | Germany                                                    |
| Dures, Simon          | Conservation Ecologist                                     |                                                                           | United Kingdom of Great Britain and Northern Ireland (the) |
| During, Melanie       | Research Assistance in Vertebrate Paleontology             | Uppsala University                                                        | Sweden                                                     |
| Duringer, Jennifer    |                                                            | Oregon State University                                                   | United States of America (the)                             |
| Duron, Olivier        | Evolutionary biologist                                     | CNRS                                                                      | France                                                     |
| Durrant, Alexandra    | PhD Candidate in Neuroscience                              | University of Nottingham                                                  | United Kingdom of Great Britain and Northern Ireland (the) |
| Durrieu, Matthias     | PhD student, Neurosciences                                 | Université Paul Sabatier, Toulouse                                        | France                                                     |
| Dusart, Nicolas       | post-doctoral position                                     | UMR PIAF - INRAe                                                          | France                                                     |
| Dussailant, Alejandro | Associate Professor                                        | Universidad de Aysén                                                      | Chile                                                      |
| Dusseldorp, Gerrit    | Archaeology                                                | Leiden University                                                         | Netherlands (the)                                          |
| Duthie, A. Bradley    | Lecturer in Environmental Modelling                        | University of Stirling                                                    | United Kingdom of Great Britain and Northern Ireland (the) |
| Dutoit, Dominique     | AI, deep learning / Phd - authorization to direct research | sensegates                                                                | France                                                     |
| Dutrillaux, Bernard   | Research director emeritus                                 | Muséum National d'Histoire Naturelle                                      | France                                                     |
| Dutta, Abhishek       | Graduate Student                                           | University of British Columbia                                            | Canada                                                     |
| DUTTON-REGESTER, KATE | WILDLIFE CONSERVATION                                      | THE UNIVERSITY OF QUEENSLAND                                              | Australia                                                  |
| Duvall, Fern          | Native ecosystems Protection and Management                | Hawaii Dept. of Land & Natural resources, Division of Forestry & Wildlife | United States of America (the)                             |
| Duvallet, Gérard      | Professor Emeritus / Medical Entomology                    | University Paul-Valéry Montpellier 3                                      | France                                                     |
| DUWIG, Céline         | Scientist                                                  | Institut de Recherche pour le Développement                               | France                                                     |
| Dworak, Thomas        | Director                                                   | Fresh Thoughts Consulting                                                 | Austria                                                    |
| Dwyer, Catherine      | Professor of Animal Behaviour and Animal Welfare           | SRUC                                                                      | United Kingdom of Great Britain and Northern Ireland (the) |
| Dybzinski, Ray        | Assistant Professor                                        | Institute of Environmental Sustainability, Loyola University Chicago      | United States of America (the)                             |
| Dyck, Melaina         | Gruber Fellow in Global Justice (Environmental Science)    | Yale University                                                           | United States of America (the)                             |
| Dye, Adrian           | PhD Glaciology and limnology researcher                    | University of York                                                        | United Kingdom of Great Britain and Northern Ireland (the) |
| Dyer, Lee             | Professor of Ecology Evolution and Conservation Biology    | University of Nevada Reno                                                 | United States of America (the)                             |
| Dymackova, Radana     | Physician, PhD. student                                    | Masaryk Memorial Cancer Institute, Brno, Czech Republic                   | Czech Republic (the)                                       |

|                               |                                                                                        |                                                                           |                                                            |
|-------------------------------|----------------------------------------------------------------------------------------|---------------------------------------------------------------------------|------------------------------------------------------------|
| Dyman, Tetyana                | Professor, Ecotrophology                                                               | Bila Tserkva National Agrarian University                                 | Ukraine                                                    |
| Dyson, Peter                  | Emeritus Professor of Physics                                                          | La Trobe University                                                       | Australia                                                  |
| Dyson, Paul                   | Professor of Molecular Microbiology                                                    | Swansea University, UK                                                    | United Kingdom of Great Britain and Northern Ireland (the) |
| Dzepina, Katja                | Assistant Professor                                                                    | University of Rijeka                                                      | Croatia                                                    |
| Dzerefos, Cathy               | Postdoctoral fellow                                                                    | North West University                                                     | South Africa                                               |
| Dziadek, Ricarda              | Postdoctoral researcher / Geophysics                                                   | Alfred Wegener Institute, Helmholtz Center for Polar and Marine Research  | Germany                                                    |
| Dziewit, Kacper               | PhD Student in Biology                                                                 | University of Warsaw                                                      | Poland                                                     |
| Dzurenko, Marek               | Ecologist                                                                              | Institute of Forest Ecology                                               | Slovakia                                                   |
| E-Vojtkó, Anna                | PhD student in Plant Ecology                                                           | Department of Botany, University of South Bohemia                         | Czech Republic (the)                                       |
| E. Reis, Roberto              | Professor                                                                              | Pontifical Catholic University of Rio Grande do Sul                       | Brazil                                                     |
| Eagle, Dan                    | Physics graduate, prospective PhD student                                              | Imperial College London                                                   | United Kingdom of Great Britain and Northern Ireland (the) |
| Earl, Julia                   | Assistant Professor                                                                    | Louisiana Tech University                                                 | United States of America (the)                             |
| Earle, Christopher            | Forest ecology                                                                         | Gymnosperm Database, ICF                                                  | United States of America (the)                             |
| Easterbrook, Steve            | Director, School of the Environment                                                    | University of Toronto                                                     | Canada                                                     |
| Eastham, Matthew              | Postgraduate researcher - cell and molecular biology                                   | Newcastle University                                                      | United Kingdom of Great Britain and Northern Ireland (the) |
| Eastment, Conor               | Conservation Biology                                                                   | University of Cape Town                                                   | South Africa                                               |
| Eastwood, Gillian             | Assistant Professor (Disease Ecology)                                                  | Virginia Tech University                                                  | United States of America (the)                             |
| Ebenhard, Torbjörn            | Deputy director / Ecologist                                                            | Swedish Biodiversity Centre, Swedish University of Agricultural Sciences  | Sweden                                                     |
| Ebensperger, Luis             | Professor of Biology                                                                   | P. Universidad Católica de Chile                                          | Chile                                                      |
| Ebersole, James               | Professor of Biology                                                                   | Colorado College                                                          | United States of America (the)                             |
| Ebert, Samuel                 | Reseracher and Lecturer (Post-Doc)                                                     | Technical University of Munich                                            | Germany                                                    |
| echevaria, joyce              | BA Geography: Urban Development/Environmental Science                                  | Slippery Rock University, Slippery Rock, Pennsylvania                     | United States of America (the)                             |
| Echeverria, Carlos Alejandro  | Pos Doctoral researcher                                                                | Federal University of Rio de Janeiro - UFRJ                               | Brazil                                                     |
| Echeverría, Javier            | Professor of Organic Chemistry and Ethnopharmacology, Universidad de Santiago de Chile | Universidad de Santiago de Chile                                          | Chile                                                      |
| Echeverry -Gonzalez, Carlos A | Chemist                                                                                | PSLproanalysis                                                            | Colombia                                                   |
| Echeverry-Alcendra, Andrea    | Interim Executive Director / Conservation Biologist                                    | Colombian Association of Zoos and Aquariums (ACOPAZOA) / Barranquilla Zoo | Colombia                                                   |
| Echeveste, Pedro              | Assistant professor                                                                    | Universidad de Antofagasta                                                | Chile                                                      |
| Eckartz, Katharina            | Professor of Economics                                                                 | TH Bingen                                                                 | Germany                                                    |
| Ecker, Tobias                 | Research scientist / spacecraft department                                             | German Aerospace Center (DLR)                                             | Germany                                                    |
| Eckert, Sandra                | Senior research scientist/remote sensing expert                                        | Centre for Development and Environment, University of Bern                | Switzerland                                                |
| Eckert, Christopher           | Professor of Biology                                                                   | Queen's University                                                        | Canada                                                     |
| Eckmann, Reiner               | Professor Limnology                                                                    | University of Konstanz                                                    | Germany                                                    |
| Ecoffet, Paul                 | PhD Student in Computer Science                                                        | ISIR, Sorbonne Université, Paris                                          | France                                                     |

|                         |                                                                                                                |                                                                                  |                                                            |
|-------------------------|----------------------------------------------------------------------------------------------------------------|----------------------------------------------------------------------------------|------------------------------------------------------------|
| EDERY, Patrick          | Department co-head, professor / Genetics                                                                       | University Lyon 1                                                                | France                                                     |
| Edoo, Zainab            | PhD student - Microbiology                                                                                     | Sorbonne Université                                                              | France                                                     |
| Edtbauer, Achim         | Postdoc in Atmospheric Chemistry                                                                               |                                                                                  | Germany                                                    |
| Edwards, Taylor         | Associate Staff Scientist / Conservation Genetics                                                              | University of Arizona                                                            | United States of America (the)                             |
| Edwards, David          | Professor of Conservation Science                                                                              | University of Sheffield                                                          | United Kingdom of Great Britain and Northern Ireland (the) |
| Edwards, Bruce          | R&D preventing enormous wildfires by increasing Initial Attack success rate to cut CO2 by hundreds of megatons | Firetech Engineering Inc.                                                        | Canada                                                     |
| Edyvane, Karen          | University Professorial Fellow, environmental science                                                          | Charles Darwin University                                                        | Australia                                                  |
| Eeraerts, Maxime        | PhD                                                                                                            | Universiteit Gent                                                                | Belgium                                                    |
| Eeva, Tapio             | Dr.                                                                                                            | University of Turku                                                              | Finland                                                    |
| Effah, Bernard          | Senior Lecturer (Forestry/Wood Science), PhD                                                                   | Kumasi Technical University                                                      | Ghana                                                      |
| Effenberger, Mathias    | Senior Researcher for Technology Assessment in Agriculture                                                     | Bavarian State Research Center for Agriculture                                   | Germany                                                    |
| Efrat, Ron              | PhD Candidate                                                                                                  | Ben-Gurion University of the Negev                                               | Israel                                                     |
| Egana-Ugrinovic, Daniel | Postdoctoral Associate                                                                                         | Perimeter Institute                                                              | Canada                                                     |
| Egbert, Matthew         | Senior Lecturer, Interdisciplinary Science                                                                     | University of Auckland                                                           | New Zealand                                                |
| Egert, Janine           | PhD Systems Biology                                                                                            | University of Freiburg                                                           | Germany                                                    |
| Eggen, Joseph           | Astrophysicist                                                                                                 | University of Maryland / NASA                                                    | United States of America (the)                             |
| Egger, Garry            | Epidemiology                                                                                                   | CHPR                                                                             | Australia                                                  |
| Eggers, Lilian          |                                                                                                                | UFRGS                                                                            | Brazil                                                     |
| Eggers, Jeannette       | Researcher in forest planning                                                                                  | Swedish University of Agricultural Sciences                                      | Sweden                                                     |
| Egilsdóttir, Aðalbjörg  | Biologist                                                                                                      |                                                                                  | Iceland                                                    |
| Egli, Lukas             | PhD Student                                                                                                    | Helmholtz Center for Environmental Research - UFZ                                | Germany                                                    |
| Egli, Pascal            | PhD student / glaciology                                                                                       | University of Lausanne                                                           | Switzerland                                                |
| Eguiraun, Harkaitz      | Associate Professor                                                                                            | University of the Basque Country UPV/EHU                                         | Spain                                                      |
| Ehlers Smith, David     | Conservation ecologist                                                                                         | University of KwaZulu-Natal                                                      | South Africa                                               |
| Ehman, Melissa          | Epidemiologist                                                                                                 | University of California, San Francisco / California Department of Public Health | United States of America (the)                             |
| Ehmle, Hartmut          | Physicist                                                                                                      | Helmholtz-Zentrum für Materialien und Energie GmbH                               | Germany                                                    |
| Ehrenfels, Benedikt     |                                                                                                                | Eawag & ETH Zurich                                                               | Switzerland                                                |
| Ehrenreich, Petra       | Microbiologist                                                                                                 | Georg-August-Universität Göttingen                                               | Germany                                                    |
| EHRHART, Yves           | Enseignant / chercheur, silviculture                                                                           | AgroParisTech - Centre de Nancy                                                  | France                                                     |
| Ehrlich, Anne           | Sr. Research Scientist emerita                                                                                 | Stanford University                                                              | United States of America (the)                             |
| Ehrlich, Paul           | Bing Professor of Population Studies Emeritus                                                                  | Stanford University                                                              | United States of America (the)                             |
| Ehrlich, Gianna         | Postdoctoral researcher                                                                                        | Johannes Gutenberg University Mainz, Department of Communication                 | Germany                                                    |
| Eibl, Beatriz Irene     | Native Species. Seeds and Plants                                                                               | Forestry School. National University of Misiones                                 | Argentina                                                  |
| Eichert, Rebecca        | Master Student                                                                                                 | University of Kassel                                                             | Germany                                                    |
| Eichhorn, Götz          | PhD / Animal Ecology                                                                                           | Netherlands Institute of Ecology (NIOO-KNAW)                                     | Netherlands (the)                                          |

|                           |                                                                  |                                                                                  |                                                            |
|---------------------------|------------------------------------------------------------------|----------------------------------------------------------------------------------|------------------------------------------------------------|
| Eichner, Gerrit           | Akademischer Oberrat                                             | Mathematical Institute Justus Liebig University Giessen                          | Germany                                                    |
| Eichstaedter, René        | Environmental Physics                                            | Institute of Environmental Physics Heidelberg                                    | Germany                                                    |
| Eickhoff, Hans            | Researcher                                                       | Coimbra Institute for Clinical and Biomedical Research (iCBBR)                   | Portugal                                                   |
| Eidesen, Pernille Bronken | Associate professor in Biology                                   | The University Centre in Svalbard                                                | Norway                                                     |
| Eikelboom, Jasper A.J.    | PhD candidate Quantitative Ecology                               | Wageningen University and Research                                               | Netherlands (the)                                          |
| Eisch, Amelia.            | Professor                                                        | University of Pennsylvania/children's hospital of Philadelphia                   | United States of America (the)                             |
| Eiseb, Seth               | Senior Lecturer, School of Science                               | University of Namibia                                                            | Namibia                                                    |
| Eisel, Ulrich             | Professor in Molecular Neurobiology and Neuroimmunology          | University of Groningen                                                          | Netherlands (the)                                          |
| Eiseman, Danielle         | Communication                                                    | Cornell University                                                               | United States of America (the)                             |
| Eisen, Olaf               | Professor for Glaciology                                         | Alfred Wegener Institute Helmholtz-Centre for Polar and Marine Research          | Germany                                                    |
| Eisenbeck, Nikolett       | Assistant Professor in Psychology                                | University of Seville                                                            | Spain                                                      |
| Eisenhauer, Nico          | Professor for Experimental Interaction Ecology                   | Leipzig University                                                               | Germany                                                    |
| Eisenring, Michael        | Postdoc/Researcher                                               | University of Wisconsin-Madison                                                  | United States of America (the)                             |
| Eisenstaedt, Jean         | Research director in history of science                          | Paris Observatory                                                                | France                                                     |
| Eisenstein, Lea           | PhD student                                                      | Institute of Meteorology and Climate Research, Karlsruhe Institute of Technology | Germany                                                    |
| Eisner, Rowan             | Landscape ecologist                                              |                                                                                  | United Kingdom of Great Britain and Northern Ireland (the) |
| Eizirik, Eduardo          | Full Professor - Conservation genetics and evolutionary genomics | PUCRS                                                                            | Brazil                                                     |
| Ejder, Sema               | Phd student                                                      | Newcastle University                                                             | United Kingdom of Great Britain and Northern Ireland (the) |
| Ejeskär, Katarina         | Professor of biomedicine                                         | University of Skövde                                                             | Sweden                                                     |
| Ekkers, David             | PhD student                                                      | Rijksuniversiteit Groningen                                                      | Netherlands (the)                                          |
| EKOUEVI, Didier Koumavi   | Epidemiologist                                                   | Université de Lomé                                                               | Togo                                                       |
| Ekrami, Omid              |                                                                  | University of Antwerp                                                            | Belgium                                                    |
| Ekrem, Torbjørn           | Professor                                                        | Norwegian University of Science and Technology                                   | Norway                                                     |
| Ekvall, Tomas             | Adjunct Professor, Environmental Systems Analysis                | Chalmers University of Technology                                                | Sweden                                                     |
| El Attar Sofi, Oumayma    | Vet                                                              |                                                                                  | France                                                     |
| El Bizri, Hani            | PhD student                                                      | Manchester Metropolitan University                                               | United Kingdom of Great Britain and Northern Ireland (the) |
| EL KABOURI, JAMAL         | PhD                                                              | university Chouaib-doukkali, faculty of sciences                                 | Morocco                                                    |
| El mansy, Shima           | Mrs                                                              | Suez canal University                                                            | Egypt                                                      |
| EL Mkami, Hassane         | Research Fellow                                                  | University of St-Andrews, School of Physics and Astronomy                        | United Kingdom of Great Britain and Northern Ireland (the) |
| El-Ballat, Enas           | Assistant Professor of Microbiology                              | Tanta University                                                                 | Egypt                                                      |
| El-Esawi, Mohamed         | Professor of Biological Sciences                                 | Tanta University                                                                 | Egypt                                                      |
| El-Hani, Charbel          | Full Professor, History and Philosophy of Biology                | Federal University of Bahia                                                      | Brazil                                                     |

|                                |                                                                  |                                                              |                                                            |
|--------------------------------|------------------------------------------------------------------|--------------------------------------------------------------|------------------------------------------------------------|
| El-Sayed, Essam                | Senior research consultant in energy and water desalination      |                                                              | Canada                                                     |
| Elasar, Mia                    | Chairwoman                                                       | IMMRAC (Israeli Marine Mammals Research & Assistance Center) | Israel                                                     |
| Elbadry, Eman                  | PhD Student                                                      | CML Institution, Leiden University                           | Netherlands (the)                                          |
| Eldemirdash, Jasmin            | Master in Ecology                                                | Ain Shams University                                         | Egypt                                                      |
| Elder, John                    | Professor of Biology                                             | Valdosta State University                                    | United States of America (the)                             |
| Elders, Philip                 | Medical student                                                  | Vrije Universiteit Amsterdam                                 | Netherlands (the)                                          |
| Elez, Katarina                 | PhD student in Bioinformatics                                    | Freie Universität Berlin                                     | Germany                                                    |
| Elf, Patrick                   | Research Fellow                                                  | Middlesex University                                         | United Kingdom of Great Britain and Northern Ireland (the) |
| Elias, Marianne                | Researcher in evolutionary biology                               | CNRS                                                         | France                                                     |
| Eliassen, Heather              | Associate Professor of Medicine and Epidemiology                 | Harvard University and Brigham and Women's Hospital          | United States of America (the)                             |
| Eliasson, Peter                | PhD Ecology                                                      | Botswana International University of Science and Technology  | Botswana                                                   |
| ELIE BERTRAND, MEGAM NGOONKADI | Dr                                                               | University of Dschang                                        | Cameroon                                                   |
| Eliran, Alon                   | Soil Remote Sensing; Urban Sustainability                        | Ariel University; Tel Aviv University; Civil Society         | Israel                                                     |
| Elise, Simon                   | Marine ecology                                                   | UMR ENTROPIE Reunion Island University                       | Réunion                                                    |
| Elliff, Carla                  | Oceanography                                                     | Young Ecosystem Services Specialists (YESS)                  | Brazil                                                     |
| Elliott, James                 | Flow cytometry                                                   | MRC LMS                                                      | United Kingdom of Great Britain and Northern Ireland (the) |
| Ellis, Lisa                    | Professor of Philosophy and Politics                             | University of Otago                                          | New Zealand                                                |
| Ellis, Katherine               | Research Assistant                                               | Louisiana State University                                   | United States of America (the)                             |
| Ellis, Sophia                  | MSc Tropical Marine Biology                                      | University of Essex                                          | United Kingdom of Great Britain and Northern Ireland (the) |
| Elmer, Franziska               | Marine ecology faculty                                           | School for field studies                                     | Turks and Caicos Islands (the)                             |
| Elo, Merja                     |                                                                  | University of Jyväskylä                                      | Finland                                                    |
| Eloranta, Antti                | PhD, Docent                                                      | University of Jyväskylä                                      | Finland                                                    |
| Elosegi, Arturo                | Professor of Ecology                                             | University of the Basque Country                             | Spain                                                      |
| Eloy Alves, Ricardo Jorge      | Postdoctoral Researcher in Microbial Ecology and Biogeochemistry | Lawrence Berkeley National Laboratory, CA, USA               | United States of America (the)                             |
| Elsaesser, David               | Environmental Science                                            | University of Kblenz-Landau                                  | Germany                                                    |
| Elschot, Kelly                 | Research scientist marsh ecology                                 | Wageningen University Research                               | Netherlands (the)                                          |
| Elsler, Laura                  | PhD candidate                                                    | Stockholm Resilience Centre                                  | Sweden                                                     |
| Elsner, Martin                 | Professor of Analytical Chemistry and Water Chemistry            | Technical University of Munich                               | Germany                                                    |
| Elson, Dominic                 | Environmental Economist                                          | Verwill Berdikari                                            | United Kingdom of Great Britain and Northern Ireland (the) |
| Elster, Doris                  | Professor of Science Education                                   | University of Bremen                                         | Germany                                                    |
| Eltz, Thomas                   | Zoologist                                                        | Ruhr-Universität Bochum                                      | Germany                                                    |
| Embert, Dirk                   | Biologist/ Conservation                                          | WWF                                                          | Germany                                                    |

|                       |                                                                   |                                                                                                        |                                                            |
|-----------------------|-------------------------------------------------------------------|--------------------------------------------------------------------------------------------------------|------------------------------------------------------------|
| Emer, Carine          | PostDoc Ecology and Conservation                                  | São Paulo State University                                                                             | Brazil                                                     |
| Emerick, John         | Professor Emeritus                                                | Colorado School of Mines                                                                               | United States of America (the)                             |
| Emerson, Luke         | PhD candidate in ecology                                          | Deakin University                                                                                      | Australia                                                  |
| Emery, Kitty          | Associate Curator, Natural History (Archaeology)                  | Florida Museum of Natural History, University of Florida                                               | United States of America (the)                             |
| Emery, Helena         | PhD Student Bioscience                                            | Swansea University                                                                                     | United Kingdom of Great Britain and Northern Ireland (the) |
| Emery, Alan           | PhD Marine Sciences 1967                                          | Canadian Museum of Nature (1983-1996) KIVU Nature Inc. (to Present)                                    | Canada                                                     |
| EMERY, Nicolas        | CNRS researcher                                                   | Institut de Chimie et Matériaux Paris-Est                                                              | France                                                     |
| Emich, Jana           | PhD student in genetics                                           | University of Münster                                                                                  | Germany                                                    |
| Emiya, Valentin       | Assistant Professor in Computer Science                           | Aix-Marseille University                                                                               | France                                                     |
| Emmanuel, Jorge       | Adjunct Professor, Institute of Environmental and Marine Sciences | Silliman University                                                                                    | Philippines (the)                                          |
| Emmerich, Daniel      | Professor and PhD in biology                                      | Instituto de Biodiversidad Neotropical (Tucumán) and Escuela Normal Superior D. V. Sarsfield (Córdoba) | Argentina                                                  |
| Emmerichs, Tamara     | Atmospheric Sciences                                              | Forschungszentrum Jülich                                                                               | Germany                                                    |
| Emmons, Louise        | Mammalogy, ecology                                                | Smithsonian, NMNH                                                                                      | United States of America (the)                             |
| Emr, Scott            | Professor of Molecular Biology and Genetics                       | Cornell University                                                                                     | United States of America (the)                             |
| Enbert, Ursula        | Snow Scientist                                                    |                                                                                                        | Austria                                                    |
| Encalada, Sandra      | Associate Professor                                               | The Scripps Research Institute                                                                         | United States of America (the)                             |
| Encarnação, Telma     | PhD researcher                                                    | University of Coimbra                                                                                  | Portugal                                                   |
| Encarnação, João      | PhD Student on Non-native marine species                          | CCMAR, University of Algarve                                                                           | Portugal                                                   |
| Encarnação, Cláudia   |                                                                   | University of Évora                                                                                    | Portugal                                                   |
| Endermann, Monika     | 89143                                                             | Praxis für Ernährungstherapie                                                                          | Germany                                                    |
| Endo, Whaldener       | Professor                                                         | Universidade Federal de Roraima                                                                        | Brazil                                                     |
| Endress, Peter K.     | Professor Emeritus, Botany                                        | University of Zurich                                                                                   | Switzerland                                                |
| Endsley, K. Arthur    | Postdoctoral Researcher, Terrestrial Carbon Management            | University of Montana                                                                                  | United States of America (the)                             |
| Engardt, Magnuz       | Associate professor in Meteorology                                | Environment and Health Administration, Stockholm                                                       | Sweden                                                     |
| engel, julien         | Engineer                                                          | French National Research Institute for Sustainable Development                                         | France                                                     |
| Engel, Philipp        | Professor of Microbiology                                         | University of Lausanne                                                                                 | Switzerland                                                |
| Engel, Vera Lex       | Associate Professor/Restoration Ecology                           | São Paulo State University - UNESP                                                                     | Brazil                                                     |
| Engel, Jennifer       | Pneumology                                                        | Ambulatory                                                                                             | Germany                                                    |
| Engel, Felicitas      | Human Medicine                                                    | University of Heidelberg                                                                               | Germany                                                    |
| Engelbrecht, Bettina  | Professor, Plant Ecology                                          | Bayreuth University                                                                                    | Germany                                                    |
| Engelbrecht, Hubert   | Dr. rer. nat.                                                     | Geologist and Environmentalist                                                                         | Germany                                                    |
| Engelhardt, Hermann   | Glaciologist                                                      | Caltech                                                                                                | United States of America (the)                             |
| Engelhardt, Dr. Antje | Reader (Assoc. Prof.) in Primate Behaviour and Conservation       | Liverpool John Moores University                                                                       | United Kingdom of Great Britain and Northern Ireland (the) |
| Engelhardt, Yuri      | assistant professor                                               | University of Twente                                                                                   | Netherlands (the)                                          |

|                                      |                                                              |                                                            |                                                            |
|--------------------------------------|--------------------------------------------------------------|------------------------------------------------------------|------------------------------------------------------------|
| Engelman, Catherine                  | PhD candidate                                                | Oregon State University                                    | United States of America (the)                             |
| Engelmann, Rolf A.                   | PhD student and Research Technician in Biodiversity Research | German Centre for Integrative Biodiversity Research (iDiv) | Germany                                                    |
| Engelstaedter, Sebastian             | Climate Research Analysis Scientist                          | University of Oxford                                       | United Kingdom of Great Britain and Northern Ireland (the) |
| Engert, Jayden                       | Spatial Ecology                                              | James Cook University                                      | Australia                                                  |
| Engert, Peter                        | Social Science                                               | RheinMain University of Applied Sciences                   | Germany                                                    |
| Engl, Tobias                         | Assistant professor                                          | Johannes Gutenberg-University Mainz, Evolutionary Ecology  | Germany                                                    |
| England, Laura                       | Senior Lecturer, Dept. of Sustainable Development            | Appalachian State University                               | United States of America (the)                             |
| Engler, Simon                        | Scientific Programmer                                        | University of Hawaii                                       | United States of America (the)                             |
| Engler, John-Oliver                  | Research associate                                           | Leuphana University Lüneburg                               | Germany                                                    |
| English, Holly                       | PhD Student, Biology and Environmental Science               | University College Dublin                                  | Ireland                                                    |
| Engström, Linda                      | PhD in Rural Development                                     | Swedish University of Agricultural Sciences                | Sweden                                                     |
| Engwall, Magnus                      | Professor, ecotoxicology                                     | Örebro University                                          | Sweden                                                     |
| Enklaar, Floor                       | Msc International land and water management                  | Wageningen UR                                              | Netherlands (the)                                          |
| Ennes Silva, Felipe                  | PhD Student - Wildlife Conservation                          | Mamiraua Institute for Sustainable Development             | Brazil                                                     |
| Ennos, Richard                       | Professor of Ecological Genetics                             | University of Edinburgh                                    | United Kingdom of Great Britain and Northern Ireland (the) |
| Enqvist, Johan                       | Postdoctoral researcher, Sustainability Science              | University of Cape Town                                    | South Africa                                               |
| Enrech-Xena, Claudia                 | Urban sustainability - pedagogy                              | L'atelier - Education for sustainable action               | France                                                     |
| Enríquez Magaña, Azucena Guillermina | Master in behavior science                                   | Universidad de Guadalajara                                 | Mexico                                                     |
| Enriquez-de-Salamanca, Alvaro        | Assistant professor                                          | Universidad Complutense de Madrid                          | Spain                                                      |
| Ens, Bruno                           | Coastal ecology                                              | Sovon Dutch Centre for Field Ornithology                   | Netherlands (the)                                          |
| Epp, Julia                           | Researcher                                                   | Potsdam Institute for Climate Impact Research              | Germany                                                    |
| Epperly Chester, Sheryan             | Marine Sciences                                              | retired from NOAA, National Marine Fisheries Service       | United States of America (the)                             |
| Epron, Daniel                        | Professor                                                    | Université de Lorraine                                     | France                                                     |
| EPRON, Daniel                        | Professor                                                    | Kyoto University                                           | Japan                                                      |
| Erba, Stefania                       | Researcher/Hydrobiologist-Ecologist                          | CNR-IRSA                                                   | Italy                                                      |
| Erda, Fikirte                        | Large carnivore ecologist                                    | Oklahoma State University                                  | United States of America (the)                             |
| Erdem, Zeynep                        | postdoctoral researcher                                      | NIOZ                                                       | Netherlands (the)                                          |
| Erdős, Laszlo                        | ecologist                                                    | Hungarian Academy of Sciences                              | Hungary                                                    |
| Erdozain, Maitane                    | Postdoctoral fellow on stream ecology                        | University of New Brunswick                                | Spain                                                      |
| Erhardt, Stefanie                    | Phd Student, Ecology                                         | University of Hohenheim                                    | Germany                                                    |
| Erickson, Heather                    | Research Ecologist                                           | Consulting Research Ecology                                | United States of America (the)                             |
| Erickson, Jon                        | Blittersdorf Professor of Sustainability Science and Policy  | University of Vermont                                      | United States of America (the)                             |
| Erickson, Ricky-Lee                  | Collection Manager, Natural Sciences                         | Auckland War Memorial Museum                               | New Zealand                                                |
| Eriksdon, Eva                        | Associate professor (former)                                 | Department of environmental engineering                    | Denmark                                                    |
| Eriksen, Ane                         | Associate Professor, wildlife biology                        | Inland Norway University of Applied Sciences               | Norway                                                     |
| Eriksson, Ann                        | Biology                                                      |                                                            | Canada                                                     |



|                             |                                                                                                                                 |                                                                                    |                                                            |
|-----------------------------|---------------------------------------------------------------------------------------------------------------------------------|------------------------------------------------------------------------------------|------------------------------------------------------------|
| Eriksson, Maertha           | PhD student in functional zoo morphology/Biology                                                                                | Stockholm University                                                               | Sweden                                                     |
| Eriksson, Mats              | Project assistant - Environmental archaeology                                                                                   | Umeå university                                                                    | Sweden                                                     |
| Eriksson, Ola               | Professor in environmental engineering                                                                                          | University of Gävle                                                                | Sweden                                                     |
| Eriksson, K. Martin         | PhD and Network Manager of SDSN Northern Europe                                                                                 | Gothenburg Centre for Sustainability                                               | Sweden                                                     |
| Eriksson, Ulrika            | PhD, Analytical Environmental Chemistry                                                                                         | Örebro University                                                                  | Sweden                                                     |
| Erjavec, Mihela             | Senior lecturer in psychology                                                                                                   | Bangor University                                                                  | United Kingdom of Great Britain and Northern Ireland (the) |
| Erkenswick Watsa, Mrinalini | Senior Scientist                                                                                                                | Field Projects International                                                       | United States of America (the)                             |
| Erkosar, Berra              | Researches in ecology and evolution                                                                                             | University of Lausanne                                                             | Switzerland                                                |
| Erlandson, Jon              | Emeritus Museum Director and Professor                                                                                          | University of Oregon Museum of Natural & Cultural History                          | United States of America (the)                             |
| Erlania, Erlania            | PhD Candidate                                                                                                                   | Deakin University                                                                  | Australia                                                  |
| Erlwein, Alfredo            | Professor, Faculty of Agrarian Sciences/bioenergy                                                                               | Universidad Austral de Chile                                                       | Chile                                                      |
| Ernest, Holly               | Professor and Excellence Chair, Wildlife Genomics & Disease Ecology                                                             | University of Wyoming                                                              | United States of America (the)                             |
| Ernesto, Ortiz              | Postdoctoral fellow                                                                                                             | Universidad Nacional Autónoma de México                                            | Mexico                                                     |
| Erneux, Christophe          | Professor                                                                                                                       | Université Libre de Bruxelles                                                      | Belgium                                                    |
| Erning, Katharina           | Dr. rer. nat. / Geology                                                                                                         |                                                                                    | Germany                                                    |
| Ernst, Ulrich               | Postdoctoral researcher                                                                                                         | University of Münster                                                              | Germany                                                    |
| Ernst, Stefan               |                                                                                                                                 | Humbolt University Berlin                                                          | Germany                                                    |
| Ernst, Ariane               | Scientific staff                                                                                                                | Zuse Institute Berlin                                                              | Germany                                                    |
| Eronen, Jussi               | Associate Professor, long-term sustainability science                                                                           | University of Helsinki                                                             | Finland                                                    |
| Erős, Tibor                 |                                                                                                                                 | MTA Centre for Ecological Research                                                 | Hungary                                                    |
| Eroukhanoff, Fabrice        | Researcher                                                                                                                      | University of Oslo                                                                 | Norway                                                     |
| Erridge, Zoe                | Post Harvest Fruit+Vegetable Research Associate                                                                                 | Plant and Food Research                                                            | New Zealand                                                |
| Escalante, Patricia         | Investigadora Titular                                                                                                           | Instituto de Biología UNAM                                                         | Mexico                                                     |
| Escalona, Moisés            | PhD student                                                                                                                     | Pontificia Universidade Católica do Rio Grande do Sul (PUCRS)                      | Venezuela (Bolivarian Republic of)                         |
| Escamilla Rivera, Verónica  | Postdoctoral Scholar                                                                                                            | Institute for the Study of Continental Ecosystems in the National Patagonic Center | Argentina                                                  |
| Escandon, Javier            | Investigador en etnografía social                                                                                               | Flacso/ Universidad de Cuenca                                                      | Ecuador                                                    |
| Escaravage, Nathalie        | Assistant professor                                                                                                             | University Toulouse                                                                | France                                                     |
| Escartin, Javier            | Marine Geosciences                                                                                                              | IPGP - CNRS - Université de Paris                                                  | France                                                     |
| Eschenbrenner, Jérôme       | PhD Student, Ecology                                                                                                            | iEES Paris                                                                         | France                                                     |
| Esclarski, Priscilla        | Ornithologist, Master in Ecology, MBA environmental management and sustainable development, PhD academy in Comparative Biology. | Universidade Estadual de Maringá -UEM                                              | Brazil                                                     |
| Escobar, Elva               | Prof                                                                                                                            | UNAM                                                                               | Mexico                                                     |
| Escobar-Briones, Elva       | Full time Professor/Oceanography                                                                                                | Universidad Nacional Autónoma de México                                            | Mexico                                                     |
| ESCOBAR-SANDOVAL, Margarita | Research professor, Dendroecology                                                                                               | University of Science and Arts of Chiapas                                          | Mexico                                                     |
| Escobedo Quevedo, Karla     | PhD student                                                                                                                     | University of Groningen                                                            | Netherlands (the)                                          |
| Escontrela Dieguez, Daniela | Graduate Assistant/PhD Candidate                                                                                                | University of Hawai'i and Mānoa                                                    | United States of America (the)                             |

|                             |                                                                                          |                                                                |                                                            |
|-----------------------------|------------------------------------------------------------------------------------------|----------------------------------------------------------------|------------------------------------------------------------|
| Escoubas, Jean-Michel       | Research Scientist                                                                       | CNRS                                                           | France                                                     |
| Escriva, Hector             | Research Director                                                                        | CNRS                                                           | France                                                     |
| Esculier, Fabien            | Biogeochemist                                                                            | Ecole des Ponts ParisTech                                      | France                                                     |
| Escurra, Alessandra         | Hydrobiology, fishery and ichthyology                                                    | Natural History Museum - UNMSM                                 | Peru                                                       |
| Esguícero, André            | Post-doc                                                                                 | Universidade de São Paulo                                      | Brazil                                                     |
| Eshel, Gidon                | Research Prof., geophysics                                                               | Bard College                                                   | United States of America (the)                             |
| Eskew, Evan                 | Research Scientist                                                                       | EcoHealth Alliance                                             | United States of America (the)                             |
| Esler, Karen                | Professor and HOD                                                                        | Stellenbosch University                                        | South Africa                                               |
| Esnouf, Antoine             | Environmental engineer, PhD                                                              | INRA                                                           | France                                                     |
| Espeland, Marianne          | Curator of Lepidoptera                                                                   | Zoological Research Museum Alexander Koenig                    | Germany                                                    |
| Esperon-Rodriguez, Manuel   | Postdoctoral Researcher                                                                  | Western Sydney University                                      | Australia                                                  |
| Espindola, Vinicius         | pre-Doc                                                                                  | MZUSP                                                          | Brazil                                                     |
| Espinosa, Manuel            | Professor, Biology                                                                       | Consejo Superior de Investigaciones Científicas                | Spain                                                      |
| Espinosa, Free              | Senior lecturer/Marine Biology                                                           | University of Seville                                          | Spain                                                      |
| Espinosa, Cayetano          |                                                                                          | Universidad Andres Bello                                       | Chile                                                      |
| Espinosa-Cantellano, Martha | Professor                                                                                | Center for Research and Advanced Studies                       | Mexico                                                     |
| Espinosa-Duró, Virginia     | Associate professor                                                                      | Tecnocampus                                                    | Spain                                                      |
| Espinoza, Robert            | Professor of Biology                                                                     | California State University, Northridge                        | United States of America (the)                             |
| Esser, Helen                | postdoctoral researcher - disease ecology                                                | Wageningen University & Research                               | Netherlands (the)                                          |
| Esser, Luiz                 | Post-doc/Biogeography                                                                    | Universidade Estadual de Maringá                               | Brazil                                                     |
| Essl, Franz                 | Ass.-Prof.                                                                               | University Vienna                                              | Austria                                                    |
| Estabrook, Thomas           | Public Health                                                                            | University of Massachusetts Lowell                             | United States of America (the)                             |
| Estades, Naina              | Professor                                                                                | Federal University of Paraná                                   | Brazil                                                     |
| Estaki, Mehrbod             | Postdoctoral Researcher                                                                  | University of California San Diego                             | United States of America (the)                             |
| Estandia, Andrea            | PhD student                                                                              | University of Oxford                                           | United Kingdom of Great Britain and Northern Ireland (the) |
| ESTANDÍA, RUBÉN             | PSICÓLOGO                                                                                | RETIRED                                                        | Spain                                                      |
| Estberg, Jerry              | physics Professor emeritus                                                               | University of San Diego                                        | United States of America (the)                             |
| Esteban, Jose               | Professor, Neuroscience                                                                  | Centro de Biología Molecular Severo Ochoa                      | Spain                                                      |
| Estes, Suzanne              | Associate Professor of Biology                                                           | Portland State University                                      | United States of America (the)                             |
| Estève, Yannick             | Professor                                                                                | Avignon Université                                             | France                                                     |
| Esteve-Altava, Borja        | Evolutionary Biology                                                                     | Pompeu Fabra University                                        | Spain                                                      |
| Esteve-Selma, Miguel-Angel  | Professor of Ecology                                                                     | Universidad de Murcia                                          | Spain                                                      |
| Esteves, Carolina           | Researcher                                                                               | Instituto Pró-Carnívoros                                       | Brazil                                                     |
| Esteves, Ivânia             | Nematology researcher                                                                    | Centre for Functional Ecology - University of Coimbra          | Portugal                                                   |
| Esteves, Jose               | Post doctoral Researcher and MBA Professor, Innovation for Sustainable Organizations/ESG | PUC PR Pontifícia Universidade Católica do Paraná              | Brazil                                                     |
| Estévez, Eurne              |                                                                                          | University of Cantabria                                        | Spain                                                      |
| Estoup, Arnaud              | Director of research                                                                     | Institut National de la Recherche Agronomique                  | France                                                     |
| Estrada, Alejandro          | senior research scientist                                                                | Institute of Biology, National autonomous University of Mexico | Mexico                                                     |

|                                     |                                                                     |                                                                    |                                                            |
|-------------------------------------|---------------------------------------------------------------------|--------------------------------------------------------------------|------------------------------------------------------------|
| Estrada, Francisco                  | Researcher                                                          | Universidad Nacional Autónoma de México                            | Mexico                                                     |
| Estrada Piedrahita, Kelly Alexandra | Masters student in Bioremediation                                   | Queen's University                                                 | Canada                                                     |
| Estrada-Peña, Agustín               | Full Professor of Zoonoses                                          | University of Zaragoza                                             | Spain                                                      |
| Etcheverry, Angela Virginia         | Professor of Botany                                                 | Universidad Nacional de Salta                                      | Argentina                                                  |
| Eterovick, Paula                    | Associate Professor                                                 | Pontificia Universidade Católica de Minas Gerais                   | Brazil                                                     |
| Etienne, Jocelyn                    | CNRS researcher in biophysics                                       | Univ Grenoble Alpes                                                | France                                                     |
| Etienne, Lucas                      | Ecology                                                             |                                                                    | France                                                     |
| Etienne, Lucie                      | Researcher                                                          | CNRS                                                               | France                                                     |
| Etkind, Simon                       | Physician                                                           |                                                                    | United Kingdom of Great Britain and Northern Ireland (the) |
| Etter, Simon                        | PhD Student in Hydrology                                            | University of Zurich, Department of Geography                      | Switzerland                                                |
| Etxebeste, Iñaki                    | Forest Ecology Researcher                                           | Errez Koop. Elk. Txikia                                            | Spain                                                      |
| Eva, Hugh                           | Senior Scientist                                                    | Joint Rearch Centre                                                | Italy                                                      |
| Evangelista, Charlotte              | Postdoctoral researcher                                             | Centre for Ecological and Evolutionary Synthesis                   | Norway                                                     |
| Evanno, Guillaume                   | Researcher in Ecology and evolutionary biology                      | INRA                                                               | France                                                     |
| Evans, John                         | Professor in Plant Sciences                                         | Australian National University                                     | Australia                                                  |
| Evans, Alina                        | Associate Professor                                                 | Inland Norway University of Applied Sciences                       | Norway                                                     |
| Evans, Elaine                       | Extension Professor                                                 | University of Minnesota                                            | United States of America (the)                             |
| Evans, Julian                       | Lecturer                                                            | University of Malta                                                | Malta                                                      |
| Evans, Timothy                      | Professor of Biology (Botany)                                       | Grand Valley State University                                      | United States of America (the)                             |
| Evans, Rhian                        | Research Scientist / marine ecology                                 | Institute for Marine and Antarctic Studies, University of Tasmania | Australia                                                  |
| EVANS, DAVID                        | Scientist Emeritus Aquatic Ecology                                  | Trent University                                                   | Canada                                                     |
| Evanylo, Gregory                    | Professor, Environmental Soil Science                               | Virginia Tech                                                      | United States of America (the)                             |
| Even, Catherine                     | associate professor in physics                                      | Université Paris Sud                                               | France                                                     |
| Evensen, Carl                       | Extension Specialist/ Natural Resource & Environmental Management   | University of Hawaii at Manoa                                      | United States of America (the)                             |
| Evenson, William                    | Physics, Retired                                                    | Brigham Young University, Utah Valley University                   | United States of America (the)                             |
| Everatt, Kristoffer                 | Carnivore ecologist                                                 | Panthera/Nelson Mandela University                                 | Canada                                                     |
| Eviner, Valerie                     | Professor                                                           | University of California, Davis                                    | United States of America (the)                             |
| Ewens, Sophia                       | Doctoral Candidate of Environmental Microbiology                    | University of California, Berkeley                                 | United States of America (the)                             |
| Ewert, Megan                        | GIS Office (Humanitarian Aid)                                       |                                                                    | Estonia                                                    |
| Ewins, Pete                         | Lead Species Conservation Specialist                                | WWF-Canada                                                         | Canada                                                     |
| Exposito-Alonso, Moises             | Principal Investigator and Assistant Professor in Biology           | Carnegie Institution for Science and Stanford University           | United States of America (the)                             |
| Eyers, David                        | Computer Science                                                    | University of Otago                                                | New Zealand                                                |
| Eyraud, Remi                        | Associate Pffessor                                                  | Aix-Marseille University                                           | France                                                     |
| Eyre, Victoria                      | Research Associate                                                  | Plant and Food Research ltd                                        | New Zealand                                                |
| Ezanno, Pauline                     | Senior researcher in epidemiological modelling                      | BIOEPAR, INRA, Oniris                                              | France                                                     |
| Ezcurra, Paula                      | Staff Research Associate                                            | Scripps Institution of Oceanography                                | United States of America (the)                             |
| Ezenwa, Ifeanyi                     | Assistant Lecturer, Department of Zoology and Environmental Biology | University of Nigeria Nsukka                                       | Nigeria                                                    |

|                                  |                                                               |                                                        |                                                            |
|----------------------------------|---------------------------------------------------------------|--------------------------------------------------------|------------------------------------------------------------|
| Ezzedine, Khaled                 | Professor of Dermatology                                      | University Paris Est Créteil                           | France                                                     |
| F. De-Miguel, Francisco          | Professor of Neuroscience                                     | Universidad Nacional Autónoma de Mexico                | Mexico                                                     |
| F.O. Miranda, Vitor              | Professor/ Scientist                                          | UNESP - São Paulo State University                     | Brazil                                                     |
| Fabeiro, Concepcion              | Teacher and resercher in Agricultural engineering             | Castilla-La Mancha University                          | Spain                                                      |
| Faber, Mirko                     | Infectious Disease Epidemiology                               | Robert Koch Institute                                  | Germany                                                    |
| Fabiani, Ginevra                 | PhD student                                                   | LIST - Luxembourg Institute for Science and Technology | Luxembourg                                                 |
| Fabre, Adrien                    | Economist                                                     | Paris School of Economics                              | France                                                     |
| Fabrice, Vavre                   | Researcher in Evolutionary Biology                            | CNRS - Lyon                                            | France                                                     |
| Fabricio Neto, Ailton            | Researcher                                                    | UFES                                                   | Brazil                                                     |
| Fabricius, Michelle              | Biologist                                                     | University of Malta                                    | Malta                                                      |
| Fabricius, Katharina             | Senior Principal Research Scientist                           | AIMS                                                   | Australia                                                  |
| Faccenda, Kevin                  | Graduate Researcher, Botany                                   | University of Hawai'i at Mānoa                         | United States of America (the)                             |
| Facchinetti-Mannone, Valerie     | Assistant Professor - Geography                               | University of Burgundy                                 | France                                                     |
| Facon, Benoit                    | Researcher / Evolutionary Biology                             | INRA                                                   | France                                                     |
| Fadini, Rodrigo                  | Associate Professor                                           | Universidade Federal do Oeste do Para                  | Brazil                                                     |
| Fadrique, Belen                  | Ecology                                                       | University of Miami                                    | United States of America (the)                             |
| Faedi, Francesca                 | Researcher in astrophysics                                    | INAF Italy                                             | Italy                                                      |
| Faergeman, Ole                   | Emeritus Professor of Preventive Cardiology                   | Aarhus University                                      | Denmark                                                    |
| Fahey, Babette                   | Biological Anthropology                                       | Harvard University                                     | Australia                                                  |
| Fahrni, Laurence                 | Postdoctoral research associate (Offshore Renewable Energy)   | University of Exeter                                   | United Kingdom of Great Britain and Northern Ireland (the) |
| Faïn, Xavier                     | Research scientist / Paleoclimatology                         | CNRS                                                   | France                                                     |
| Fairhead, Laurent                | Research Engineer / Climatology                               | LMD/IPSL/CNRS                                          | France                                                     |
| Fairhurst, PhD, RPF, Dr. Kenneth | Visual Landscape Specialist - Planning and Impacts Assessment | RDI Resource Design Inc                                | Canada                                                     |
| Fais, Maria                      | Biologist and PhD Candidate                                   |                                                        | Italy                                                      |
| Fais, Maria                      | PhD student in Marine Molecular Ecology                       | University of Minho                                    | Portugal                                                   |
| Faivre, Bruno                    | Prof. Ecology                                                 | Université de Bourgogne                                | France                                                     |
| Fajardo-Gutiérrez, Francisco     | Principal Investigator Flora of Bogota, Biologist             | Jardín Botánico de Bogotá José Celestino Mutis         | Colombia                                                   |
| Fajgenblat, Maxime               | PhD Researcher                                                | KU Leuven                                              | Belgium                                                    |
| Falanruw, Margie                 | biologist                                                     | Yap Institute of Natural Science                       | Micronesia (Federated States of)                           |
| Falcini, Francesca               | PhD researcher                                                | University of York                                     | United Kingdom of Great Britain and Northern Ireland (the) |
| Falk, Ulrike                     | Climate Research                                              | German Weather Service (DWD)                           | Germany                                                    |
| Falk, Don                        | Professor                                                     | University of Arizona                                  | United States of America (the)                             |
| Fall, Andrew                     | Adjunct Professor, Resource and Environmental Management      | Simon Fraser University                                | Canada                                                     |
| Faller, Mathias                  | Geologie                                                      | geowindow PH Freiburg                                  | Germany                                                    |
| Fallet, Manon                    | Postdoctoral researcher in environmental epigenetics          | Univeristy of Oxford                                   | United Kingdom of Great Britain and Northern Ireland (the) |
| Falótico, Tiago                  | Biologist                                                     | University of São Paulo                                | Brazil                                                     |

|                            |                                                                   |                                                                  |                                                            |
|----------------------------|-------------------------------------------------------------------|------------------------------------------------------------------|------------------------------------------------------------|
| Falster, Daniel            | Senior lecturer, ARC Future Fellow                                | University of New South Wales                                    | Australia                                                  |
| Falter-Braun, Pascal       | Professor & institute Director                                    | Helmholtz Zentrum München & Ludwig-Maximilians-University Munich | Germany                                                    |
| Fanelli, Francesca         | Researcher                                                        | National Council of Research                                     | Italy                                                      |
| Fankhauser, Christian      | Professor, Biology                                                | University of Lausanne                                           | Switzerland                                                |
| Fantini, Márcia C A        | Ful Professor/Physics                                             | Physics Institute-University of Sao Paulo                        | Brazil                                                     |
| Faragó, Tibor              | hon. professor (geography, environment)                           | St. Istvan University (Hungary)                                  | Hungary                                                    |
| Farahpour, Farnoush        | postdoctoral researcher                                           | University of Duisburg-Essen                                     | Germany                                                    |
| Faraut, Lauriane           | PhD in biology                                                    | German Primate Center                                            | Germany                                                    |
| Färber Lorda, Jaime        | Senior Scientist, Marine Ecology.                                 | CICESE                                                           | Mexico                                                     |
| Fares, Silvano             | Senior Researcher                                                 | Council for Agricultural Research and Economics                  | Italy                                                      |
| Fárez Román, Valeria       | Ecohydrologist - Assistant Professor                              | Universidad Nacional de Educación                                | Ecuador                                                    |
| Fargeon, Hélène            | PhD student in Forestry                                           | INRA                                                             | France                                                     |
| faria, deborah             | Full Professor                                                    | Universidade Estadual de Santa Cruz                              | Brazil                                                     |
| Faria, Paulina             | Associate Professor/Civil Engineering                             | NOVA University of Lisbon                                        | Portugal                                                   |
| Farina, DANIELA            | Lab Manager                                                       | University of Exeter                                             | United Kingdom of Great Britain and Northern Ireland (the) |
| FARINACCIO, MARIA          | PROFESSOR/ BOTANY                                                 | Federal University of Mato Grosso do Sul                         | Brazil                                                     |
| Farinotti, Daniel          | Group leader, Glaciology                                          | VAW - ETH Zurich and WSL Birmensdorf                             | Switzerland                                                |
| Farjalla, Vinicius         | Associate Professor / Ecology                                     | Universidade Federal do Rio de Janeiro                           | Brazil                                                     |
| Farkas, Stanley            | Scientist, Co-founder and Organization Lead                       | Secure The Future 2100                                           | United States of America (the)                             |
| Farmer, Ben                | Waterfront Assistant                                              | School for Field Studies                                         | Turks and Caicos Islands (the)                             |
| Farmer, James              | Associate Professor- Human Ecology                                | Indiana University                                               | United States of America (the)                             |
| Faro, Jose                 | Associate Professor                                               | University of Vigo                                               | Spain                                                      |
| Farò, David                | PostDoc in River Ecohydraulics                                    | University of Trento                                             | Italy                                                      |
| Faroni-Perez, Larisse      | Postdoctoral Researcher                                           | Federal University of Juiz de Fora                               | Brazil                                                     |
| Farooq, Harith             | Postdoc                                                           | Lúrio University                                                 | Mozambique                                                 |
| Farrell, Tina              | Astronomy                                                         | Swinburne University                                             | United States of America (the)                             |
| Farrow, Luke               | Higher Scientific Officer/Post Doc in environmental water quality | Agri-Food and Bioscience Institute                               | United Kingdom of Great Britain and Northern Ireland (the) |
| Farrugia Drakard, Veronica | PhD Student, Marine Biology                                       | University College Dublin                                        | Ireland                                                    |
| Faryuni, Irfana Diah       | PhD Student in Earth and Life Institute                           | UC Louvain                                                       | Belgium                                                    |
| Fassbender, Elisabeth      | Research Associate                                                | TU Munich                                                        | Germany                                                    |
| Fastré, Constance          | PhD student                                                       | University of Antwerp                                            | Belgium                                                    |
| Fateman, Richard           | Professor Emeritus, Computer Science                              | University of California, Berkeley                               | United States of America (the)                             |
| Fatima, Zuasti             | veterinarian                                                      |                                                                  | Uruguay                                                    |
| Faucherre, Samuel          | PhD, Arctic permafrost                                            | CENPERM - University of Copenhagen                               | Denmark                                                    |
| Fauci, Lisa                | Professor of Mathematics                                          | Tulane University                                                | United States of America (the)                             |
| Faucon, Michel-Pierre      | Professor and Vice Dean Research                                  | UniLaSalle                                                       | France                                                     |
| Fauconnet, Laurence        | Marine ecology and fisheries                                      | IMAR - University of Azores                                      | Portugal                                                   |
| Faudry, Eric               | Microbiology and biochemistry scientist                           |                                                                  | France                                                     |

|                           |                                                                                                  |                                                                         |                                |
|---------------------------|--------------------------------------------------------------------------------------------------|-------------------------------------------------------------------------|--------------------------------|
| Faugeron, Sylvain         | Professor / evolutionary ecology of seaweeds                                                     | Pontificia Universidad Catolica de Chile                                | Chile                          |
| Faulstich, Leona          | Research assistant, Geography                                                                    | Freie Universität Berlin                                                | Germany                        |
| Faura, Georgina           | Post doctoral analytical chemist.                                                                | University of Udine                                                     | Italy                          |
| Faure, Chrystel           |                                                                                                  | Institute of Chemistry and Biology of membranes and Nano-objects        | France                         |
| Fauré, Adrien             | Assistant profesor, bioinformatics                                                               | Yamaguchi university                                                    | Japan                          |
| Faustino, Augusto         | Full Professor Veterinary Pathology                                                              | Biomedical Sciences Institute Abel Salazar - Univeristy of Porto        | Portugal                       |
| Faustino de Lima, Ricardo | Postdoc researcher - Ecology                                                                     | Lisbon University                                                       | Portugal                       |
| Faustino-Fuster, Dario R. | Ichthyologist                                                                                    | Museo de Historia Natural - UNMSM (MUSM)                                | Peru                           |
| Fausto-Sterling, Anne     | Professor Emerita Molecular Biology                                                              | Brown University                                                        | United States of America (the) |
| Fauvarque, Olivier        | Post doc in Physics                                                                              | Laboratoire d'Astrophysique de Marseille                                | France                         |
| Favaro, Brett             | Research Scientist                                                                               | Memorial University of Newfoundland                                     | Canada                         |
| Favier, Lionel            | Postdoctoral researcher - Glaciology                                                             | Institut des Géosciences de l'Environnement (Grenoble - France)         | France                         |
| Favot, Elizabeth          | PhD Candidate, Paleolimnology                                                                    | Queen's University                                                      | Canada                         |
| Favre, Anne-Catherine     | Professor                                                                                        | Grenoble Institute of Engineering                                       | France                         |
| Favre, Cecile             | Junior Research Chairholder / Astrophysics                                                       | IPAG/UGA                                                                | France                         |
| Fawcett, Anne             | Veterinarian                                                                                     | University Of Sydney - School Of Veterinary Science                     | Australia                      |
| Fazi, Stefano             | Researcher                                                                                       | Water Research Institute, National Research Council of Italy (IRSA-CNR) | Italy                          |
| fazzi, paola              | wildlife biologist                                                                               |                                                                         | Italy                          |
| Fea, Nyree                | Research Fellow / Ecology                                                                        | Victoria University of Wellington                                       | New Zealand                    |
| Feather, Jackie           | Doctor of Clinical Psychology/Senior Lecturer                                                    | Auckland University of Technology                                       | New Zealand                    |
| Federigan, Ludwig         | Non-Resident Fellow on Environment, Climate Change, Disaster Risk, Resilience and Sustainability | Stratbase ADR Institute                                                 | Philippines (the)              |
| Fedriani, Jose            |                                                                                                  | CSIC, Center for Desertification Research                               | Spain                          |
| Feeley, Kenneth           | Associate Professor of Biology, Smathers Chair of Tree Biology                                   | University of Miami                                                     | United States of America (the) |
| Feeney, Ann               | Professor Emeritus, Molecular biology                                                            | Scripps Research Institute                                              | United States of America (the) |
| Feereira, Rodrigo         | Full professor                                                                                   | Universidade Federal de Lavras                                          | Brazil                         |
| Fehér, Zoltán             | Senior Curator / Zoology                                                                         | Hungarian Natural History Museum                                        | Hungary                        |
| Fehrenbacher, Jennifer    | Assistant Professor                                                                              | Oregon State University                                                 | United States of America (the) |
| Feit, Ben                 | Terrestrial Ecologist                                                                            | Swedish University of Agricultural Sciences                             | Sweden                         |
| Feitosa, Leonardo         |                                                                                                  | Universidade Federal de Pernambuco                                      | Brazil                         |
| Felber, François          | Lecturer                                                                                         | University of Neuchâtel                                                 | Switzerland                    |
| Felcis, Elgars            | Researcher                                                                                       | University of Latvia                                                    | Latvia                         |
| Feldhaar, Heike           | Prof. Dr.                                                                                        | University of Bayreuth                                                  | Germany                        |
| Feldman, Tracy            | Assistant Professor of Biology                                                                   | St. Andrews University—a branch of Webber International University      | United States of America (the) |
| Feldmann, Eike            | Forest Ecology                                                                                   | University of Geottingen                                                | Germany                        |
| Feldmeyer, Barbara        | PostDoc                                                                                          | Dr.                                                                     | Germany                        |

|                                      |                                              |                                                                                        |                                                            |
|--------------------------------------|----------------------------------------------|----------------------------------------------------------------------------------------|------------------------------------------------------------|
| Feldpausch, Ted                      | Associate Professor                          | University of Exeter                                                                   | United Kingdom of Great Britain and Northern Ireland (the) |
| Felgueiras, Marcial                  | Executive Director                           | A ROCHA - Associação Cristã de Estudo e Defesa do Ambiente                             | Portugal                                                   |
| Felix Regasso, Dahyes                | Phd candidate                                | Faculdade de Filosofia, Ciências e Letras de Ribeirão Preto, Universidade de São Paulo | Brazil                                                     |
| Fell, Adam                           | PHD Applicants                               | Stirling University                                                                    | United Kingdom of Great Britain and Northern Ireland (the) |
| Feller, Stephan                      | Professor of Tumor Biology                   | Martin Luther University Halle-Wittenberg                                              | Germany                                                    |
| fellous, simon                       | Researcher in biological sciences            |                                                                                        | France                                                     |
| Fellous, Jean-Louis                  |                                              | Committee on Space Research (COSPAR)                                                   | France                                                     |
| Fellous, Alexandre                   | Postdoc in marine evolutionary biology       | Alfred Wegener Institute (AWI)                                                         | Germany                                                    |
| Felton, Michelle                     | Postdoctoral Researcher                      | University of Reading                                                                  | United Kingdom of Great Britain and Northern Ireland (the) |
| Femmer, Randolph                     | Editor and Senior Director                   | Biospheric Literacy 101                                                                | United States of America (the)                             |
| Fender, Pascal                       | Biology                                      | CNRS                                                                                   | France                                                     |
| Fendt, Christian                     | Astrophysicist                               | Max Planck Institute for Astronomy                                                     | Germany                                                    |
| Fenet, Serge                         | Assistant professor / Computer science       | Université Lyon 1                                                                      | France                                                     |
| Fenn-Moltu, Gyda                     | PhD student in ecology                       | University of Lausanne                                                                 | Switzerland                                                |
| Fenner, Douglas                      | coral reef biologist                         | Consultant                                                                             | American Samoa                                             |
| Fenolio, Dante                       | VP, Conservation & Research                  | Center for Conservation & Research, San Antonio Zoo                                    | United States of America (the)                             |
| Feraïlle, Eric                       | Associate Professor in Fundamental Medicine  | University of Geneva                                                                   | Switzerland                                                |
| Ferdinand, Simon                     | Geography and visual culture                 | The University of Amsterdam                                                            | Netherlands (the)                                          |
| ferguson, james                      | consulting biochemist                        | University of Toronto                                                                  | Canada                                                     |
| Ferguson, Elizabeth                  | Marine Ecologist & Educator                  | Ocean Science Analytics                                                                | United States of America (the)                             |
| Ferguson, Jan Willem                 | Researcher, Centre for Environmental Studies | University of Pretoria                                                                 | South Africa                                               |
| Ferguson-Gow, Henry                  | Postdoc (Macroecology and biodiversity)      | University College London                                                              | United Kingdom of Great Britain and Northern Ireland (the) |
| Ferkin, Michael                      | Professor                                    |                                                                                        | United States of America (the)                             |
| Fermin, Gustavo                      | Full Professor/Molecular Biology             | Universidad de Los Andes                                                               | Venezuela (Bolivarian Republic of)                         |
| Fernandes, Paulo                     | Associate Professor, wildland fire           | Universidade de Trás-os-Montes e Alto Douro                                            | Portugal                                                   |
| Fernandes, Thiago                    | Researcher                                   | Instituto de Pesquisa do pantanal                                                      | Brazil                                                     |
| Fernandes, Daniell Rodrigo Rodrigues | Postdoctoral Researcher                      | Instituto Nacional de Pesquisas da Amazônia                                            | Brazil                                                     |
| Fernandes, Rodrigo                   | Associate Professor of Ecology               | Universidade Federal Rural do Semi-Árido                                               | Brazil                                                     |
| Fernandes, Kenya                     | Researcher, Microbiology                     | University of Sydney                                                                   | Australia                                                  |
| Fernandes, Geraldo                   | Full Professor/Biodiversity                  | Universidade Federal de Minas Gerais                                                   | Brazil                                                     |
| Fernandes, Soraia                    | PostDoc                                      | ICRC-FNUSA                                                                             | Czech Republic (the)                                       |
| Fernandes, Tiago Vinicus             | Ph.D. student                                | Universidade Federal de Minas Gerias                                                   | Brazil                                                     |
| Fernandes da Silva, Daniel           | Professor/Zoology                            | Universidade Federal do Rio de Janeiro                                                 | Brazil                                                     |
| fernandez, camila                    | Oceanography                                 | CNRS                                                                                   | France                                                     |
| Fernandez, Fernando A. S.            | Full Professor of Ecology                    | Universidade Federal do Rio de Janeiro                                                 | Brazil                                                     |

|                                    |                                                   |                                                                      |                                |
|------------------------------------|---------------------------------------------------|----------------------------------------------------------------------|--------------------------------|
| Fernandez, Maria Isabel            | Instructor of Biology                             | Georgia Gwinnett College                                             | United States of America (the) |
| Fernandez, Katrina                 | Director and Ecologist                            | Wild Otters Research                                                 | India                          |
| Fernandez, Fernando                | Full Professor of Ecology                         | Universidade Federal do Rio de Janeiro                               | Brazil                         |
| Fernandez, Victor M.               | Professor (archaeology)                           | Universidad Complutense de Madrid                                    | Spain                          |
| Fernández, Néstor                  | Research fellow                                   | iDiv German Centre for Integrative Biodiversity Research             | Germany                        |
| Fernández, María Elena             | Researcher in Forest Ecology                      | Consejo Nacional de Investigaciones Científicas y Técnicas (CONICET) | Argentina                      |
| Fernández, Miguel                  | genetics student                                  | Universitat Autònoma de Barcelona                                    | Spain                          |
| Fernández, Diana Catalina          | PhD Student                                       | University of Windsor                                                | Canada                         |
| Fernandez Bayo, Jesus              | Assistant Professional Researcher                 | UC Davis                                                             | United States of America (the) |
| Fernández Carrillo, Carlos         | MD, PhD                                           | University of Pittsburgh, USA                                        | Spain                          |
| Fernández de Uña, Laura            | Postdoctoral researcher                           | INRA                                                                 | France                         |
| Fernández Martín, Begoña           | Biomedicine                                       | University of Alcalá                                                 | Spain                          |
| Fernández Martínez, Marcos         | Researcher                                        | Universiteit Antwerpen                                               | Belgium                        |
| Fernandez-Delgado, Carlos          | University professor                              | University of Córdoba                                                | Spain                          |
| FERNÁNDEZ-GARCIA, CARLOS           | Gesociences                                       | Geosciences Rennes, Univ. Rennes 1                                   | France                         |
| Fernández-Llamazares, Álvaro       | Post-doctoral research fellow                     | University of Helsinki                                               | Finland                        |
| Fernández-Ojanguren, Alfredo       | Assistant Professor of Zoology                    | Universidad de Oviedo                                                | Spain                          |
| Fernández-Palacios, José María     | Ecology Professor                                 | La Laguna University                                                 | Spain                          |
| Fernández-Palacios, José Maria     | Ecology professor                                 | University of La Laguna                                              | Spain                          |
| Fernando da Silva Siqueira, Felipe | Professor                                         | Universidade Federal do Sul e Sudeste do Pará                        | Brazil                         |
| Feron, Romain                      | PhD Student                                       | Universite de Lausanne                                               | Switzerland                    |
| ferrandis, pablo                   | full professor/plant ecology                      | university of castilla-la mancha                                     | Spain                          |
| Ferrant, Sylvain                   | Researcher                                        | IRD                                                                  | France                         |
| Ferrante, Lucas                    | Pós-graduação                                     | Instituto Nacional de Pesquisas da Amazônia (INPA)                   | Brazil                         |
| Ferrara, Maria                     | Research fellow in building engineering physics   | Energy department, Politecnico di Torino                             | Italy                          |
| Ferrari, Sylvie                    | Ecological Economics                              | University of Bordeaux                                               | France                         |
| Ferrari, Benoit                    | Group leader, ecotoxicologist                     | Swiss Centre For Applied Ecotoxicology                               | Switzerland                    |
| Ferrari, Luca                      | Scientific Assistant, Forest Resources Management | ETH Zurich                                                           | Switzerland                    |
| FERRARI, Marc                      | Astronomer                                        | Aix Marseille Univ, CNRS, CNES, LAM, Marseille                       | France                         |
| Ferraz, Pollianna                  | Biology                                           | Instituto de Desenvolvimento sustentável Mamirauá                    | Brazil                         |
| Ferraz, Katia                      | Professor                                         | University of Sao Paulo                                              | Brazil                         |
| Ferraz, José Maria Gusman          | Agroecologia                                      | UNIARA                                                               | Brazil                         |
| Ferraz Filho, Antonio Carlos       | Professor - Forest Management                     | Federal University of Piauí (UFPI)                                   | Brazil                         |
| Ferreira, Marina A.                | Post-doctoral researcher in Mathematics           | University of Helsinki                                               | Finland                        |
| Ferreira, Maria Julia              | PhD student                                       | Universidade Federal Rural de Pernambuco                             | Brazil                         |
| Ferreira, Sofia                    | Postdoctorate                                     | University of Oslo                                                   | Norway                         |
| Ferreira, Alexander C.             | PhD in Aquatic Ecology / Professor                |                                                                      | Brazil                         |
| Ferreira, Vanessa                  | PhD Student                                       | University of Aveiro                                                 | Portugal                       |
| Ferreira, Juliana                  | Master                                            | University of Sao Paulo                                              | Brazil                         |



|                               |                                                                                |                                                           |                                                            |
|-------------------------------|--------------------------------------------------------------------------------|-----------------------------------------------------------|------------------------------------------------------------|
| Ferreira, Catarina            | Conservation Biologist                                                         | IUCN                                                      | Portugal                                                   |
| Ferreira, Nuno G C            | MSCA Fellow                                                                    | Cardiff University                                        | United Kingdom of Great Britain and Northern Ireland (the) |
| Ferreira, Verónica            | Assistant Researcher                                                           | University of Coimbra                                     | Portugal                                                   |
| Ferreira, Nícia               | PhD Student                                                                    | University of Coimbra                                     | Portugal                                                   |
| Ferreira de Siqueira, Marinez | Full Researcher in Biodiversity                                                | Instituto de Pesquisas Jardim Botânico do Rio de Janeiro  | Brazil                                                     |
| Ferreira Fernandes, Sofia     | PhD Student                                                                    | Universidade Aberta & Centre for Functional Ecology       | Portugal                                                   |
| Ferreira Fontoura, Nelson     | Head of the Institute for the Environment                                      | PUCRS                                                     | Brazil                                                     |
| Ferreira Jr., Aurino          | Biologist                                                                      | Autonomous                                                | Brazil                                                     |
| Ferreira Rodríguez, Noé       | PhD, Freshwater ecology                                                        | Universidade de Vigo                                      | Spain                                                      |
| Ferrenberg, Scott             | Assistant Professor of Biology                                                 | New Mexico State University                               | United States of America (the)                             |
| Ferrer, Erica                 | PhD Student                                                                    | UC San Diego                                              | United States of America (the)                             |
| Ferrer, Miguel                | Research Professor                                                             | Consejo Superior de Investigaciones Científicas           | Spain                                                      |
| Ferrer, Julianio              | PhD                                                                            | Universidade Federal do Rio Grande do Sul                 | Brazil                                                     |
| Ferrer, Martin                | Energy Engineer                                                                | UPC                                                       | Spain                                                      |
| Ferrer-Castán, Dolores        | Associate Professor/Ecologist                                                  | University of Salamanca                                   | Spain                                                      |
| Ferreras, Pablo               | Senior Researcher                                                              | Spanish Research Council                                  | Spain                                                      |
| Ferrero, Victoria             | Postdoctoral researcher                                                        | CEF, Centre for Functional Ecology. University of Coimbra | Portugal                                                   |
| Ferretti, Orlando             | Researcher, Geographer                                                         | Universidade Federal de Santa Catarina / UFSC.            | Brazil                                                     |
| Ferriere, Regis               | Professor, Ecology and Evolutionary Biology                                    | Ecole Normale Supérieure & University of Arizona          | United States of America (the)                             |
| Ferring, Joakim               | Research Assistant                                                             | Chalmers University of Technology                         | Sweden                                                     |
| Ferris, Joseph                | PRINCIPAL SCIENTIST & DIRECTOR                                                 | ECAP Consultancy Group                                    | United Kingdom of Great Britain and Northern Ireland (the) |
| Ferro-Famil, Laurent          | Prof., Radar remote sensing                                                    | The University of Rennes1                                 | France                                                     |
| Ferry, John                   | Professor, Environmental Chemistry                                             | University of South Carolina                              | United States of America (the)                             |
| Fétick, Romain                | PhD student in astrophysics                                                    | Laboratoire d'Astrophysique de Marseille                  | France                                                     |
| Fettweis, Xavier              | Prof in climatology                                                            | University of Liège                                       | Belgium                                                    |
| Fewings, Jason                | BSc(Hons) Chemistry, Mineral Science, Process Control, Dip. Project Management | Murdoch University, Curtin University                     | Australia                                                  |
| Fewster, Rachel               | Professor, Statistics                                                          | University of Auckland                                    | New Zealand                                                |
| Fialho, Nuno                  | MSc Student in Conservation Biology                                            | Faculty of Sciences of the University of Lisbon           | Portugal                                                   |
| Fialkowski, Wojciech          | Associate Professor, Ecology                                                   | Jagiellonian University                                   | Poland                                                     |
| Ficetola, Gentile Francesco   | Professor of Zoology                                                           | University of Milan                                       | Italy                                                      |
| Fichant, Gwennaele            | Professor Bioinformatics                                                       | University Toulouse III - CNRS                            | France                                                     |
| Fichot, Régis                 | PhD in plant physiology                                                        | Université d'Orléans                                      | France                                                     |
| Fichtel, Claudia              | Biology                                                                        | German Primate Center                                     | Germany                                                    |
| Ficko-Blean, Elizabeth        | Research Scientist                                                             | CNRS                                                      | France                                                     |
| Fidler Mis, Nataša            | prof. of nutrition and nutritionist/dietitian                                  | University Medical Centre Ljubljana                       | Slovenia                                                   |
| Fieberg, John                 | Associate Professor of Quantitative Ecology                                    | University of Minnesota                                   | United States of America (the)                             |
| Fiedler, Sara                 |                                                                                | University of Tuebingen                                   | Germany                                                    |

|                            |                                                               |                                                                      |                                                            |
|----------------------------|---------------------------------------------------------------|----------------------------------------------------------------------|------------------------------------------------------------|
| Fiedler, Kevin             | Assistant Professor of Mathematics and Statistics             | Washington State University                                          | United States of America (the)                             |
| Fiesler, Emile             |                                                               | Bioveyda Biodiversity Inventories                                    | United States of America (the)                             |
| Fieux, Etienne             | Mathematics                                                   | Toulouse Mathematics Institute                                       | France                                                     |
| Fievet, Virgil             | Associate Professor - Evolutionary Ecology                    | INRA - Bordeaux University                                           | France                                                     |
| Fife-Cook, Isabel          | Graduate Student, Ethology                                    | New York University                                                  | United States of America (the)                             |
| FIGGENER, CHRISTINE        | Marine Conservation Biologist                                 | Texas A&M University                                                 | United States of America (the)                             |
| Figon, Florent             | Associate professor of Biology                                | Université Grenoble Alpes                                            | France                                                     |
| Figueiredo, Alexandre      | PhD Student in Evolutionary Biology                           | University of Zurich                                                 | Switzerland                                                |
| Figuera, Clàudia           | PhD Student                                                   | Stockholm University                                                 | Sweden                                                     |
| Figuera, Claudia           | PhD student                                                   | Stockholm University                                                 | Sweden                                                     |
| Figueroa, Israel           | Scientist - Microbiology & Bioengineering                     | Visolis, Inc.                                                        | United States of America (the)                             |
| Figueroa, María Eugenia    | Profesor                                                      | Universidad Nacional de Santiago del Estero                          | Argentina                                                  |
| Figueroa, Charles          | Applied Ecologist                                             | UC Irvine                                                            | United States of America (the)                             |
| Figuerola, Blanca          | Postdoc                                                       | Institute of Marine Science-CSIC                                     | Spain                                                      |
| Fijen, Thijs               | Postdoctoral researcher Plant Ecology and Nature Conservation | Wageningen University                                                | Netherlands (the)                                          |
| Filbet, Francis            | Applied Mathematics                                           | Université de Toulouse                                               | France                                                     |
| Filhol, Simon              | Geoscientist                                                  |                                                                      | Norway                                                     |
| Filipe, Ana Filipa         | Post-doctoral Researcher, Freshwater Ecology                  | CIBIO-InBIO, University of Porto                                     | Portugal                                                   |
| Filipek-Gorniok, Beata     | Researcher                                                    | Uppsala Univeristy                                                   | Sweden                                                     |
| Filipiak, Matthias         | Project Coordinator and Researcher                            | Thünen Institute of Agricultural Technology                          | Germany                                                    |
| Filipović Marijić, Vlatka  | senior research associate, environmental sciences             | Ruđer Bošković Institute                                             | Croatia                                                    |
| Filla, Marc                | PhD student                                                   | Workgroup on Endangered Species, Georg-August-Universität Göttingen  | Germany                                                    |
| Filmus, Jorge              | Professor                                                     | Univ. of Toronto                                                     | Canada                                                     |
| Filomena, Filomena         | Registered dietitian                                          | Sky 777 & Dupuy GmbH                                                 | United States Minor Outlying Islands (the)                 |
| Filser, Juliane            | Professor                                                     | University of Bremen                                                 | Germany                                                    |
| Finch, Jemma               | Senior Lecturer/Geography                                     | University of KwaZulu-Natal                                          | South Africa                                               |
| Finck-Vanstalle, Christian | Nuclear medical physicist                                     | CNRS                                                                 | France                                                     |
| Findlay, Helen             | Senior scientist, Biological Oceanography                     | Plymouth Marine Laboratory                                           | United Kingdom of Great Britain and Northern Ireland (the) |
| Findlay-Robinson, Rachel   | Postgraduate Researcher, Zoology                              | University of Cumbria                                                | United Kingdom of Great Britain and Northern Ireland (the) |
| Findley, Lloyd             | Profesor / Investigador                                       | Centro de Investigacion en Alimentacion y Desarrollo- Unidad Guaymas | Mexico                                                     |
| Finger, David Christian    | Assistant Professor                                           | Reykjavik Univeristy                                                 | Iceland                                                    |
| Fink, J Theodore           | Environmental Science and Policy Professor                    | Marist College School of Science                                     | United States of America (the)                             |
| Fink, Andreas              | Professor of Meteorology                                      | Karlsruhe Institute of Technology                                    | Germany                                                    |
| Finke, Peter               | Full professor in Soil Science                                | Ghent University                                                     | Belgium                                                    |
| Finkenbiner, Catherine     | Ph.D. Student                                                 | Oregon State University                                              | United States of America (the)                             |
| Finlayson, Colin           | Professor for Ecology & Biodiversity                          | Charles Sturt University                                             | Australia                                                  |

|                        |                                                       |                                                                                |                                                            |
|------------------------|-------------------------------------------------------|--------------------------------------------------------------------------------|------------------------------------------------------------|
| Finley, Nina           | Disease ecologist                                     | London School of Hygiene and Tropical Medicine                                 | United States of America (the)                             |
| finlez, carolina       | postdoctoral investigator in astrophysics             | pontificia universidad católica de chile                                       | Chile                                                      |
| Finney, Declan         | Postdoctoral Research Fellow                          | Institute of Climate and Atmospheric Science, University of Leeds              | United Kingdom of Great Britain and Northern Ireland (the) |
| Fiorani, Fabio         | PhD, Plant Physiology                                 | Forschungszentrum Juelich                                                      | Germany                                                    |
| Fiore, Gianluca        | Senior Scientific officer, Joint Research Center      | European Commission                                                            | Italy                                                      |
| Firth, Ron             | Director and Principal Ecologist                      | Western Ecological                                                             | Australia                                                  |
| Fischer, Oliver        | Physics                                               | Institute of Environmental Physics                                             | Germany                                                    |
| Fischer, David William | Mycologist                                            | American Mushrooms                                                             | United States of America (the)                             |
| Fischer, Tim           | Oceanography                                          |                                                                                | Germany                                                    |
| Fischer, Julia         | Professor for Primate Cognition                       | German Primate Center / University of Göttingen                                | Germany                                                    |
| Fischer, Franziska     | Agricultural sciences                                 | University of Cambridge                                                        | United Kingdom of Great Britain and Northern Ireland (the) |
| Fischer, Mauro         | PostDoc and Lecturer in Glaciology and Geomorphology  | Institute of Geography, University of Bern                                     | Switzerland                                                |
| Fischer, Luciano Gomes | Professor, Oceanography and Marine Biology            | Federal University of Rio de Janeiro                                           | Brazil                                                     |
| Fischer, Luciano       | Professor, Oceanography and Marine Biology            | Federal University of Rio de Janeiro                                           | Brazil                                                     |
| FISCHER, Gilles        | Director of research CNRS IN evolutionary genomics    | Sorbonne Université                                                            | France                                                     |
| Fisher, Matthew        | Masters Student                                       | University of Pretoria                                                         | South Africa                                               |
| Fisher, Diana          | Associate Professor, Ecology                          | University of Queensland                                                       | Australia                                                  |
| Fisher, Mark           |                                                       | Wildland Research Institute, University of Leeds                               | United Kingdom of Great Britain and Northern Ireland (the) |
| Fisher, Alina          | Research Manager & PhD Student, Environmental Studies | University of Victoria                                                         | Canada                                                     |
| Fisher, Jim            | Physics                                               | University of Nottingham (now retired)                                         | United Kingdom of Great Britain and Northern Ireland (the) |
| Fisher, Judith         | IPBES Multidisciplinary Expert Panel                  | University of Western Australia                                                | Australia                                                  |
| Fisher, Daniel         | Professor of Earth and Environmental Sciences         | University of Michigan                                                         | United States of America (the)                             |
| Fisher, Robert Scott   | Director of Undergraduate Studies                     | University of Oregon, Dept. of Physics                                         | United States of America (the)                             |
| Fisher, Marla          | Biological Sciences                                   |                                                                                | United States of America (the)                             |
| Fita, Lluís            | Researcher atmospheric science                        | Centro de Investigaciones del Mar y la Atmósfera (CIMA)                        | Argentina                                                  |
| Fite, Katherine        | Professor Emerita, Neuroscience and Behavior          | University of Massachusetts, Amherst MA                                        | United States of America (the)                             |
| Fitter, Anja           | Scientific employee                                   | RWTHAachen                                                                     | Germany                                                    |
| Fitze, Patrick S       |                                                       | Museo Nacional de Ciencias Naturales (MNCN-CSIC)                               | Spain                                                      |
| Fitzky, Anne Charlott  | Postdoc                                               | University of Natural Resources and Life Sciences Vienna - Institute of Botany | Austria                                                    |
| Fitzpatrick, John      | Executive Director, Cornell Laboratory of Ornithology | Cornell University                                                             | United States of America (the)                             |
| Fitzpatrick, Noel      | Meteorologist/Glaciologist                            | Met Éireann                                                                    | Ireland                                                    |
| Fitzpatrick, Sally     | Research Fellow, Public Health                        | Western Sydney University                                                      | Australia                                                  |
| Fitzpatrick, Benjamin  | Professor of Ecology and Evolutionary Biology         | University of Tennessee                                                        | United States of America (the)                             |

|                                |                                                                                        |                                                                                                                        |                                |
|--------------------------------|----------------------------------------------------------------------------------------|------------------------------------------------------------------------------------------------------------------------|--------------------------------|
| Fiuza de Melo, Maria Margarida | Pesquisadora Científica, aposentada, atualmente Profissional Associada Voluntária      | Instituto de Botânica, Secretaria da Infraestrutura e Meio Ambiente, Governo do Estado de São Paulo                    | Brazil                         |
| Flack, Andrea                  | Postdoctoral researcher; Animal behaviour                                              | Max Planck institute of animal behavior                                                                                | Germany                        |
| Flade, Martin                  | Landscape ecologist; director of Schorfheide-Chorin UNESCO Biosphere Reserve           | Schorfheide-Chorin UNESCO Biosphere Reserve                                                                            | Germany                        |
| Flagg-Miller, Allyson          | Ecologist                                                                              | Oregon State University                                                                                                | United States of America (the) |
| Flament, Dominique             | Chercheur émérite (Math & History of Math)                                             | CNRS                                                                                                                   | France                         |
| Flantau, Suzette               | Biology                                                                                | University of Bergen                                                                                                   | Norway                         |
| Flantua, Suzette               | Researcher                                                                             | University of Bergen                                                                                                   | Norway                         |
| Flechard, Chris R.             | Atmospheric scientist                                                                  | INRA                                                                                                                   | France                         |
| Fleck, Steve                   | CEO The Cannabinoid Research Institute / Cannabis / Agriculture / Microbiology         | Eastern Michigan University                                                                                            | United States of America (the) |
| Fleischer-Dogley, Frauke       | Chief Executive Officer                                                                | Seychelles Islands Foundation                                                                                          | Seychelles                     |
| Fleischner, Thomas L.          | Executive Director                                                                     | Natural History Institute                                                                                              | United States of America (the) |
| Flemer, Burkhardt              | PostDoc                                                                                | Leibniz-Institute for Vegetable and Ornamental Crops                                                                   | Germany                        |
| Fleming, Ian                   | Professor                                                                              | Memorial University of Newfoundland                                                                                    | Canada                         |
| Fleming, Morgan                | Researcher                                                                             | University of Tennessee Knoxville                                                                                      | United States of America (the) |
| Fleming, C Felton              | Anthropology                                                                           | –                                                                                                                      | United States of America (the) |
| Flemming, Hans-Curt            | Professor emeritus                                                                     | Biofilm Centre                                                                                                         | Germany                        |
| Fleschutz, Markus              | Research Assistant                                                                     | Institute of Refrigeration, Air-Conditioning, and Environmental Engineering, Karlsruhe University of Applied Sciences  | Germany                        |
| Fletcher, Lynn                 | Associate Professor                                                                    | Salem State University                                                                                                 | United States of America (the) |
| Fletcher, Chip                 | Associate Dean and Professor Earth Sciences                                            | University of Hawai'i at Mānoa                                                                                         | United States of America (the) |
| Fletcher, Kevin                | Director of Undergraduate Programs & Professor of Practice, Lally School of Management | Rensselaer Polytechnic Institute                                                                                       | United States of America (the) |
| Fletcher, April                | Retired Environmental Biologist                                                        | (Retiree of the U.S. Fish and Wildlife Service)                                                                        | United States of America (the) |
| Fleurbay, Marc                 | Professor                                                                              | Princeton University                                                                                                   | United States of America (the) |
| Fleurbay, Hélène               | Post-doctoral researcher in physics                                                    |                                                                                                                        | France                         |
| Fleury, Marina                 | Research fellow                                                                        | Instituto de Ecología y Biodiversidad, Facultad de Ciencias, Universidad de Chile. Las Palmeras #3425, Nuñoa, Santiago | Chile                          |
| Flexas, Jaume                  | Professor, Plant Physiology                                                            | Universitat de les Illes Balears                                                                                       | Spain                          |
| Flezar, Ursa                   | PhD candidate                                                                          | University of Ljubljana                                                                                                | Slovenia                       |
| Flick, Scott                   | Biochemistry/Genetics/Astronomy                                                        | Southern Oregon State College (circa 1994)                                                                             | United States of America (the) |
| Flint, Nicole                  | Research Fellow, Aquatic ecology                                                       | CQUniversity Australia                                                                                                 | Australia                      |
| Floch, Kévin                   | Engineer in pathology plant                                                            |                                                                                                                        | France                         |
| Flohr, Michael                 | Lecturer in Theoretical Physics                                                        | Leibniz University Hannover                                                                                            | Germany                        |
| Flood, Keegan                  | Mathematics                                                                            | University of Auckland                                                                                                 | New Zealand                    |
| Flood, Stephen                 | Adaptation Scientist                                                                   | MaREI, Environmental Research Institute, University College Cork                                                       | Ireland                        |
| Florence-Bennett, Brittany     | MSc Candidate/ Ecology and Biodiversity                                                | Victoria University of Wellington                                                                                      | New Zealand                    |

|                                  |                                                                |                                                                                  |                                                            |
|----------------------------------|----------------------------------------------------------------|----------------------------------------------------------------------------------|------------------------------------------------------------|
| Florencio Diaz, Margarita        | Profesora Ayudante Doctora Evology                             | Universidad Autónoma de Madrid                                                   | Spain                                                      |
| Florens, Vincent                 | Associate Professor of Ecology                                 | University of Mauritius                                                          | Mauritius                                                  |
| Florenzano, Assunta              | Researcher; Palynologist                                       | Università di Modena and Reggio Emilia                                           | Italy                                                      |
| Flores, Omar                     | PhD Candidate in Ecology                                       | Spanish National Research Council                                                | Spain                                                      |
| Flores Molleapaza, Mónica        | Biología                                                       |                                                                                  | Peru                                                       |
| Flores-Verdugo, Francisco J.     | PhD Biological Oceanographer. Mangrove ecology and restoration | Institute of Marine Science and Limnology. UNAM.                                 | Mexico                                                     |
| Flórez, Laura V.                 | Research Associate                                             | Institute for Organismic and Molecular Evolution - Johannes Gutenberg University | Germany                                                    |
| Flower, Emily                    | PhD Candidate                                                  | Griffith University                                                              | Australia                                                  |
| Flowers, Gwenn                   | Professor of Earth Sciences                                    | Simon Fraser University                                                          | Canada                                                     |
| Flüeler, Thomas                  | Senior Lecturer, Environmental Sciences                        | ETH Zurich                                                                       | Switzerland                                                |
| Flux, John                       | Deputy Director                                                | Ecology Division DSIR (retired)                                                  | New Zealand                                                |
| Foden, Wendy                     | Head: Cape Research Centre                                     | South African National Parks                                                     | South Africa                                               |
| Foerster, Manuel                 | Assistant Professor in Economics                               | Bielefeld University                                                             | Germany                                                    |
| Foggin, Marc                     | Research Associate / Sustainable Mountain Development          | University of British Columbia                                                   | Canada                                                     |
| Foggo, Andy                      | Associate Professor of Ecology                                 | University of Plymouth                                                           | United Kingdom of Great Britain and Northern Ireland (the) |
| Fogliani, Bruno                  | Deputy director and research scientist in Restoration Ecology  | New Caledonian Agronomic Institute                                               | New Caledonia                                              |
| Fogwill, Christopher             | Professor of Glaciology and Palaeoclimate                      | Keele University                                                                 | United Kingdom of Great Britain and Northern Ireland (the) |
| Föhre, Bettina                   | doctor                                                         | Charité                                                                          | Germany                                                    |
| Fol Leymarie, Frederic           | Professor of Computing                                         | Goldsmiths, University of London                                                 | United Kingdom of Great Britain and Northern Ireland (the) |
| Folch, Jaume                     | Associate Professor Biochemistry & Molecular Biology           | Rovira i Virgili University                                                      | Spain                                                      |
| Folch-Mallol, Jorge L.           | Professor                                                      | Universidad Autónoma del estado de Morelos                                       | Mexico                                                     |
| Földi, Csenge                    | PhD student                                                    | Biological Research Centre, Synthetic and Systems Biology Unit                   | Hungary                                                    |
| Foley, Helen                     | Lecturer Business Strategy and Sustainable Development         | Waterford Institute of Technology                                                | Ireland                                                    |
| Föll, Melanie                    | PhD Student Biology                                            | University of Freiburg                                                           | Germany                                                    |
| Foltýnová, Lenka                 | Postdoctoral researcher                                        | Global Change Research Institute, Czech Academy of Sciences, Brno                | Czech Republic (the)                                       |
| Fonseca, Tainá                   | PhD                                                            | University of Algarve                                                            | Portugal                                                   |
| Fonseca, Ana                     | Pos-Doc Reserch Fellow                                         | Instituto de Ciências Agrárias e Ambientais Mediterrânicas                       | Portugal                                                   |
| Fonseca da Silva, Vania Carolina | PhD Candidate                                                  | Durham University                                                                | Brazil                                                     |
| Fonseca Fiorini, Cecilia         | PhD candidate                                                  | Federal University of Minas Gerais                                               | Brazil                                                     |
| fontaine, colin                  | researcher in ecology                                          | CNRS                                                                             | France                                                     |
| Fontaine, Benoît                 | Ecology                                                        | Muséum national d'Histoire naturelle                                             | France                                                     |
| Fontalvo, Ruben                  | Sociólogo. Director Formación para la Investigación            | Universidad Simón Bolívar                                                        | Colombia                                                   |

|                            |                                                                        |                                                               |                                                            |
|----------------------------|------------------------------------------------------------------------|---------------------------------------------------------------|------------------------------------------------------------|
| Fontana, Luciane           | Post Doc                                                               | Universidade Federal do ABC                                   | Brazil                                                     |
| Fontcuberta, Josep         | Full Research Professor                                                | Institut de Ciència de Materials de Barcelona (ICMAB-CSIC)    | Spain                                                      |
| Fontcuberta, Amaranta      | PhD candidate                                                          | Université de Lausanne                                        | Switzerland                                                |
| Fontcuberta i Morral, Anna | Professor/Materials Science                                            | EPFL                                                          | Switzerland                                                |
| Fontecha, Gustavo          | Prof. / Genetics                                                       | Universidad Nacional Autónoma de Honduras                     | Honduras                                                   |
| Fontenelle, João Pedro     | Postdoctoral Fellow                                                    | University of Toronto                                         | Canada                                                     |
| Fontes, Marco Aurélio      | Associate Professor of Wildlife Ecology and Conservation               | University of Lavras - UFLA                                   | Brazil                                                     |
| Fontradona-Bach, Adrià     | Research assistant - Glaciology                                        | WSL                                                           | Switzerland                                                |
| Forbes, William            | Associate Professor of Geography and Sustainable Community Development |                                                               | United States of America (the)                             |
| Forbes, Cherie             | PhD candidate - applied palaeoecology and system dynamics              | University of Cape Town                                       | South Africa                                               |
| Forbes, Belinda            | BSc Conservation Biology                                               | Murdoch University                                            | Australia                                                  |
| Forbes, Anthony            | Company Director - Marine & estuarine ecology                          | Marine & Estuarine Research                                   | South Africa                                               |
| Forcella, Simona           | Veterinarian - Policy officer                                          | European Commission                                           | Italy                                                      |
| Ford, Annie                | Marine Scientist                                                       |                                                               | Australia                                                  |
| Ford, Donald               | Senior Manager, Hydrogeology and Source Water Protection               | Toronto and Region Conservation                               | Canada                                                     |
| Ford, Alex                 | Professor of Biology                                                   | University of Portsmouth                                      | United Kingdom of Great Britain and Northern Ireland (the) |
| Fordham, Barry             | Adjunct                                                                | Research School of Earth Sciences                             | Australia                                                  |
| Foreman, Kenneth           | Program Director Semester in Environmental Science                     | Marine Biological Laboratory, Woods Hole, MA                  | United States of America (the)                             |
| Forero, Dimitri            | Associate Professor; Systematic Entomology                             | Pontificia Universidad Javeriana                              | Colombia                                                   |
| Forester, Brenna           | Postdoctoral Research Fellow                                           | Colorado State University                                     | United States of America (the)                             |
| Foresti, Fausto            | Full Professor                                                         | UNESP                                                         | Brazil                                                     |
| Forestier, Sébastien       | PhD candidate, Computer Science                                        | INRIA                                                         | France                                                     |
| Forêt, Philippe            | Program Co-director / Geography                                        | Swiss Academic Society for Environmental Research and Ecology | Switzerland                                                |
| Forget, Francois           | Senior Scientist, Planetary Sciences                                   | CNRS                                                          | France                                                     |
| Forget, Pierre-Michel A.   | Professor Tropical Ecology                                             | Museum National Histoire Naturelle                            | France                                                     |
| Formanowicz, Daniel        | Professor (retired)                                                    | University of Texas - Arlington                               | United States of America (the)                             |
| Formel, Stephen            | Graduate Student, Ecology                                              | Tulane University                                             | United States of America (the)                             |
| Formichetti, Sara          | PhD                                                                    | EMBL                                                          | Italy                                                      |
| Fornaro, Mara              | Scientist                                                              | NIBR                                                          | Switzerland                                                |
| Fornaroli, Riccardo        | Post-Doc                                                               | Università degli studi di Milano-Bicocca                      | Italy                                                      |
| Forrest, Christopher       | Professor of Pediatrics                                                | University of Pennsylvania School of Medicine                 | United States of America (the)                             |
| Forrest, Jessica           | Associate Professor of Biology                                         | University of Ottawa                                          | Canada                                                     |
| Forrester, Tavis           | Wildlife Research Biologist                                            | Oregon Department of Fish and Wildlife                        | United States of America (the)                             |
| Forss, Sofia               | Postdoc researcher primatology                                         | University of Tübingen                                        | Germany                                                    |
| Fort, Philippe             | Cell Biology and Evolution                                             | CNRS                                                          | France                                                     |

|                             |                                                                                     |                                                                |                                                            |
|-----------------------------|-------------------------------------------------------------------------------------|----------------------------------------------------------------|------------------------------------------------------------|
| Fort, Jerome                | Researcher - Ecology and Ecotoxicology                                              | CNRS / LIENSs Institute                                        | France                                                     |
| Fortes Mello, José Henrique | PhD in Ecology                                                                      | Universidade Federal do Rio de Janeiro                         | Brazil                                                     |
| Fortuna, Taiadjana          | Researcher                                                                          | IRD                                                            | France                                                     |
| Fortuna Perez, Ana Paula    | Professor                                                                           | São Paulo State University                                     | Brazil                                                     |
| Forzza, Rafaela             |                                                                                     | Jardim Botânico do Rio de Janeiro                              | Brazil                                                     |
| Fosse, Ethan                | Assistant Professor of Sociology, Associate Director of the Data Sciences Institute | University of Toronto                                          | United States of America (the)                             |
| Foster, Rachel              | Researcher                                                                          | Stockholm University                                           | Sweden                                                     |
| Foster, Albert              | Private Conservation Acquisition and Management                                     | MS Ecosystems Analysis, University of Washington               | United States of America (the)                             |
| Foster, Mercedes            | Research Zoologist (retired) and Curator of Birds; currently Research Associate     | US Geological Survey and Smithsonian Institution               | United States of America (the)                             |
| Foster, Mercedes S          | Curator Emerita                                                                     | USGS/Smithsonian Institution                                   | United States of America (the)                             |
| Foster, David               | Director                                                                            | Harvard Forest Harvard University                              | United States of America (the)                             |
| Foth, Marcus                | Professor of Urban Informatics                                                      | QUT Design Lab                                                 | Australia                                                  |
| FOUCHER, Anne-Emmanuelle    | PhD-Ingenieur biochimie                                                             | CNRS                                                           | France                                                     |
| Fouchez, Dominique          | Physicist                                                                           | CNRS                                                           | France                                                     |
| Foufopoulos, Johannes       |                                                                                     | University of Michigan                                         | United States of America (the)                             |
| Foujols, Marie-Alice        | HPC and Climatology                                                                 | IPSL Institut Pierre Simon Laplace                             | France                                                     |
| Fouladoux, Rani             | Wildlife conservation                                                               | Jobless at the moment                                          | Australia                                                  |
| Foulkes, Dr Jeff            | Regional Ecologist                                                                  | Australian Wildlife Conservancy                                | Australia                                                  |
| Fountain, Emily             | Evolutionary Biologist                                                              | University of Wisconsin-Madison                                | United States of America (the)                             |
| FOURCY, Damien              | GIS analyst / Landscape ecology                                                     | INRA                                                           | France                                                     |
| Fourie, Arista              | Postdoctoral fellow in Genetics                                                     | University of Pretoria                                         | South Africa                                               |
| Fournier, Denis             | Research associate FRS-FNRS - Evolution, Ecology, Conservation                      | Université libre de Bruxelles - Evolutionary Biology & Ecology | Belgium                                                    |
| Fourquez, Marion            | Microbial oceanography - biogeochemistry                                            |                                                                | France                                                     |
| Fourrier, Marine            | PhD student - Oceanography                                                          | LOV-IMEV, Sorbonne University                                  | France                                                     |
| Fourtune, Lisa              | PhD in Ecology and Evolutionary Biology                                             |                                                                | France                                                     |
| Fowler, Jane                | Researcher                                                                          | Technical University of Denmark                                | Denmark                                                    |
| Fowler, Cynthia             | Associate Professor of Anthropology                                                 | Wofford College                                                | United States of America (the)                             |
| Fox, Barry                  | Honorary Visiting Professor of Biological Science                                   | University of New South Wales, Sydney                          | Australia                                                  |
| Fox, Helen                  | Coral Reef Ecology                                                                  | National Geographic Society                                    | United States of America (the)                             |
| Fox, Matthew                | Researcher                                                                          | Texas Tech University                                          | United States of America (the)                             |
| Fox, Clive                  | Fisheries Ecology                                                                   | Scottish Association for Marine Science                        | United Kingdom of Great Britain and Northern Ireland (the) |
| Fracalanza, Paulo Sérgio    | Professor and Director of Institute of Economics                                    | University of Campinas (Unicamp)                               | Brazil                                                     |
| Fracasso, Gerardo           | PhD student in Biology (Parasitology)                                               | University of Antwerp                                          | Belgium                                                    |
| Fragoso, Fabiana            | Post-doctorate research associate - Entomology                                      | University of Wisconsin - Madison                              | United States of America (the)                             |
| FRAISSE, Christelle         | PostDoc                                                                             | IST Austria                                                    | Austria                                                    |
| Fraixedas, Sara             | Post-doctoral researcher                                                            | Helsinki Institute of Sustainability Science (HELSUS)          | Finland                                                    |
| França, Filipe              | Postdoctoral researcher                                                             | Embrapa Amazônia Oriental                                      | Brazil                                                     |

|                                    |                                                             |                                                                 |                                                            |
|------------------------------------|-------------------------------------------------------------|-----------------------------------------------------------------|------------------------------------------------------------|
| Francescoli, Gabriel               | Professor of Ethology                                       | Facultad de Ciencias, Universidad de la República               | Uruguay                                                    |
| Francesiaz, Charlotte              | Researcher                                                  | ONCFS                                                           | France                                                     |
| FRANCHI, IVAN                      | Doctor in Environmental Science                             | Center for Sustainability Research, Universidad Andres Bello    | Chile                                                      |
| Francini-Filho, Ronaldo            | Associate Professor                                         | Federal University of Paraíba                                   | Brazil                                                     |
| Francioli, Davide                  | Postdoc                                                     | Wageningen University                                           | Netherlands (the)                                          |
| Francis, Hunter                    |                                                             | Cal Poly, SLO                                                   | United States of America (the)                             |
| Francisco, Jessica Nayara Carvalho | Master in Systematics, Evolution and Biogeography of Plants | Universiy of São Paulo                                          | Brazil                                                     |
| Francisco, Fritz                   | PhD Student                                                 | Humboldt University Berlin                                      | Germany                                                    |
| Franck, Fabrice                    | Research director                                           | University of Liège                                             | Belgium                                                    |
| Francke, Oscar                     | Senior Resarcher Arachnology                                | Universidad Nacional Autonoma de Mexico                         | Mexico                                                     |
| Franckowiak, Ryan                  | Postdoctoral Fellow                                         | Queen's University                                              | Canada                                                     |
| Francksen, Richard                 | Research Associate - Ecology                                | Newcastle University                                            | United Kingdom of Great Britain and Northern Ireland (the) |
| Franco, Miguel                     | Associate Professor (retired)                               | University of Plymouth                                          | United Kingdom of Great Britain and Northern Ireland (the) |
| Franco, Ana Clara                  | Postdoc in Ecology                                          | Universidade Federal do Estado do Rio de Janeiro                | Brazil                                                     |
| Franco, José Carlos                | Assistant Professor, Plant Protection                       | Instituto Superior de Agronomia, Universidade de Lisboa         | Portugal                                                   |
| Franco, José                       | Professor in astrophysics                                   | Instituto de Astronomía-Universidad Nacional Autónoma de México | Mexico                                                     |
| Francois, Sarah                    | PhD - virology                                              | University of Oxford                                            | United Kingdom of Great Britain and Northern Ireland (the) |
| FRANCOIS, Pierre                   | Aeronautic teacher                                          | Université de Bordeaux                                          | France                                                     |
| François, Stéphane                 | Atmospheric Chemistry - Energy policies and GHG emissions   | Atmo Bourgogne-Franche-Comté                                    | France                                                     |
| Françoise, Cellier                 | Senior Scientist                                            | INRA                                                            | France                                                     |
| Frandsen, Paul                     | Assistant Professor                                         | Brigham Young University                                        | United States of America (the)                             |
| FRANIEL, IZABELLA                  |                                                             | Uniwersytet Śląski                                              | Poland                                                     |
| Frank, Marc S.                     | Extension Botanist                                          | University of Florida Herbarium                                 | United States of America (the)                             |
| Frank, Leonard                     | Researcher, Political Science                               | Freie Universität Berlin                                        | Germany                                                    |
| Franke, Rebeca                     | Biologist                                                   |                                                                 | Colombia                                                   |
| Frankel, Matt                      | MD                                                          |                                                                 | United States of America (the)                             |
| Frankell, Alex                     | Postdoctoral fellow in bioinformatics                       | Francis Crick instiute                                          | United Kingdom of Great Britain and Northern Ireland (the) |
| Franken, Oscar                     | Postdoc Community Ecology                                   | Vrije Universiteit Amsterdam                                    | Netherlands (the)                                          |
| Franken, Paul                      | Professor in Biology                                        | Univeristy of Lausanne                                          | Switzerland                                                |
| Frankham, Richard                  | Emeritus Professor of Biology                               | Macquarie University                                            | Australia                                                  |
| Frankiewicz, Kamil                 | PhD candidate; plant biology                                | University of Warsaw                                            | Poland                                                     |
| Franklin, Elizabeth                | Researcher                                                  | National Institute for Amazon Research, INPA                    | Brazil                                                     |
| Franklin, Craig                    | Professor in Biological Sciences                            | University of Queensland                                        | Australia                                                  |



|                             |                                                                       |                                                               |                                                            |
|-----------------------------|-----------------------------------------------------------------------|---------------------------------------------------------------|------------------------------------------------------------|
| Franklin, Janet             | Distinguished Professor of Biogeography                               | University of California at Riverside                         | United States of America (the)                             |
| FRANKLIN, ELIZABETH         | RESEARCHER                                                            | NATIONAL INSTITUTE FOR AMAZON RESEARCH - INPA                 | Brazil                                                     |
| Franks, Daniel              | Reader in Ecology                                                     | The University of York                                        | United Kingdom of Great Britain and Northern Ireland (the) |
| Franks, Adele               | MD                                                                    | retired (CDC, Atlanta, GA)                                    | United States of America (the)                             |
| Franquesa-Soler, Montserrat | Postdoc researcher / Primate conservation and Sustainable development | Universidad Autónoma de México / NGO Miku Conservación        | Mexico                                                     |
| Franz, Ismael               | PostDoc                                                               | PUCRS - Pontificia Universidade Católica do Rio Grande do Sul | Brazil                                                     |
| Franzén, Bo                 | Associate Professor                                                   | Karolinska Institutet                                         | Sweden                                                     |
| Fraser, Gail                | Associate Professor, Ecology                                          | Faculty of Environmental Studies, York University             | Canada                                                     |
| Fraser, Nicola              | PhD Candidate                                                         | Southern Cross University                                     | Australia                                                  |
| Fraser, Kate                | Marine Ecology                                                        | University of Tasmania                                        | Australia                                                  |
| Frate, Ludovico             |                                                                       | Università degli Studi del Molise                             | Italy                                                      |
| Fraude, Carolin             | Research Associate                                                    | Institute for Advanced Sustainability Studies (IASS)          | Germany                                                    |
| FRAYSSINET, Eric            | Research Engineer                                                     | CNRS                                                          | France                                                     |
| Freak-Poli, Rosanne         | Epidemiologist                                                        | Monash University                                             | Australia                                                  |
| Fredeen, Arthur             | Professor, Ecosystem Science and Management                           | University of Northern British Columbia                       | Canada                                                     |
| Frediani, Kevin             | Curator of Botanic Garden                                             | University of Dundee                                          | United Kingdom of Great Britain and Northern Ireland (the) |
| Free, Scott                 | Lecturer, Biology Education                                           | University of Washington                                      | United States of America (the)                             |
| Freed, Diana                | Pharmaceutical Chemistry                                              |                                                               | United States of America (the)                             |
| Freed, Emily                | Staff Scientist in Chemical Engineering                               |                                                               | United States of America (the)                             |
| Freeman, Brian              | Sr Project Mgr/Environmental Engineer                                 | Lakes Software                                                | Canada                                                     |
| Freeman, Amanda             | Ecologist                                                             |                                                               | Australia                                                  |
| Freeman, Alastair           | Ecologist                                                             |                                                               | Australia                                                  |
| Freeman, Robin              | Head of Indicators and Assessments Unit                               | Zoological society of London                                  | United Kingdom of Great Britain and Northern Ireland (the) |
| Freese, Katherine           | Prof of Physics                                                       | University of Texas at Austin                                 | United States of America (the)                             |
| Frei, Nicolas               | Assist Prof Plant Biology                                             | University Toulouse III                                       | France                                                     |
| Frei, David                 | PhD Student                                                           | Eawag and University of Bern                                  | Switzerland                                                |
| Freilich, Jerry             | Research Coordinator                                                  | National Park Service (Retired)                               | United States of America (the)                             |
| Freilich, Mara              | PhD candidate                                                         | MIT/WHOI                                                      | United States of America (the)                             |
| Freire, Guilherme           | Professor at State University of Amazonas / Botany and biodiversity   | Universidade do Estado do Amazonas                            | Brazil                                                     |
| Freire, Carolina            | Professor of Animal Physiology                                        | Federal University of Parana                                  | Brazil                                                     |
| Freire-Fierro, Alina        | Associate Professor and Curator                                       | Universidad Técnica de Cotopaxi                               | Ecuador                                                    |
| Freitag, Anne               | Curator - Entomologist                                                | Museum of zoology                                             | Switzerland                                                |
| Freitas, Juliana            |                                                                       | Universidade Federal de São Paulo                             | Brazil                                                     |
| Freitas, Helena             | Professor                                                             |                                                               | Portugal                                                   |
| Freitas, Carolina           | Postdoc                                                               | Instituto Nacional de Pesquisas Espaciais (INPE)              | Brazil                                                     |

|                                 |                                                    |                                                                                                         |                                                            |
|---------------------------------|----------------------------------------------------|---------------------------------------------------------------------------------------------------------|------------------------------------------------------------|
| Freitas, Bárbara                | MSc Student                                        |                                                                                                         | Portugal                                                   |
| Freitas, Joana                  | Master Student                                     | Faculty of Sciences of University of Porto                                                              | Portugal                                                   |
| Freitas, André V L              | Full Priofessoe                                    | University of Campinas                                                                                  | Brazil                                                     |
| Freitas, Leandro                | Full Researcher - Botany                           | Rio de Janeiro Botanical Garden                                                                         | Brazil                                                     |
| Frelich, Lee                    | Director Center for Forest Ecology                 | University of Minnesota                                                                                 | United States of America (the)                             |
| French, Helena                  | Forensic Science                                   | Bournemouth University                                                                                  | United Kingdom of Great Britain and Northern Ireland (the) |
| Frêne, Cristian                 | Ecologist                                          | Institute of ecology and biodiversity                                                                   | Chile                                                      |
| Frenot, Yves                    | Directeur de Recherche                             | Université de Rennes 1                                                                                  | France                                                     |
| Frere, Jean-marie               | Emeritus professor of biochemistry                 | Université de Liège                                                                                     | Belgium                                                    |
| Frerich, Gerrit                 | Sociologist                                        | University Hospital Cologne                                                                             | Germany                                                    |
| Frery, Alejandro                | Professor of Statistics and Data Science           | Victoria University of Wellington                                                                       | New Zealand                                                |
| Freud, Róbert                   | mathematician                                      | ELTE Budapest                                                                                           | Hungary                                                    |
| Freund, Madeleine               | Physical Oceanograph                               | Geomar Kiel                                                                                             | Germany                                                    |
| Freund, James                   | Anti-disciplinary Lecturer                         | Lancaster University Management School                                                                  | United Kingdom of Great Britain and Northern Ireland (the) |
| Frew, Adam                      | Lecturer (Environment and Sustainability)          | University of Southern Queensland                                                                       | Australia                                                  |
| Frey, Pascal                    | Senior scientist, Forest pathology                 | INRA                                                                                                    | France                                                     |
| Frey, Julian                    | PHD-Student Forest Ecology Remote Sensing          | Albert-Ludwigs University of Freiburg                                                                   | Germany                                                    |
| Frey, Jennifer                  |                                                    | New Mexico State University                                                                             | United States of America (the)                             |
| Frey, Sibylle                   | Enviromental Science                               | Frey Consulting                                                                                         | United Kingdom of Great Britain and Northern Ireland (the) |
| Frey, Silvia                    | Marine Conservation Scientist                      | KYMA sea conservation & research                                                                        | Switzerland                                                |
| FREY, François                  | President, Programme Esprit de VELOX, oceanography | 1.618 Programme Esprit de VELOX                                                                         | France                                                     |
| Freyre-Gonzalez, Julio          | Associate Professor                                | Center for Genomic Sciences, UNAM                                                                       | Mexico                                                     |
| Fricke, Ronald                  | Biologist                                          |                                                                                                         | Germany                                                    |
| Fricke, Janis                   | Postdoctoral researcher in chemical biology        | Leibniz Institute for Natural Product Research and Infection Biology Hans Knöll Institute (Leibniz-HKI) | Germany                                                    |
| Friday, James                   | Extension Specialist in Forestry                   | University of Hawaii                                                                                    | United States of America (the)                             |
| friedman, oded                  | Chemist                                            | Bar ilan university                                                                                     | Israel                                                     |
| Friedman, Michael               | Graduate Student - Plant Physiology                | Wright State University                                                                                 | United States of America (the)                             |
| Friedman, Sarah                 | Graduate student, evolutionary biology             | UC Davis                                                                                                | United States of America (the)                             |
| Friedman, Alexandra             | Ecology and Veterinary Science                     | The Royal Veterinary College                                                                            | United Kingdom of Great Britain and Northern Ireland (the) |
| Friedman, Michael               | Assistant Professor of Biology                     | American International College of Arts and Sciences of Antigua                                          | Antigua and Barbuda                                        |
| Friedrich, Franziska            | PhD Student in Electrochemistry                    | Technical University Munich                                                                             | Germany                                                    |
| Friehs, Karl                    | Professor                                          | Bielefeld University                                                                                    | Germany                                                    |
| Frieiro-Costa, Fernando Antônio | Professor                                          | Universidade Federal de Lavras                                                                          | Brazil                                                     |
| Friel, John                     | Director                                           | Alabama Museum of Natural History                                                                       | United States of America (the)                             |

|                       |                                           |                                                           |                                                            |
|-----------------------|-------------------------------------------|-----------------------------------------------------------|------------------------------------------------------------|
| Friel, Rosemary       | Medical Doctor                            | National Health Service                                   | United Kingdom of Great Britain and Northern Ireland (the) |
| Friend, Adam          | Scientist - Plant Physiology              | The New Zealand Institute for Plant and Food Research Ltd | New Zealand                                                |
| Fries, Christian      | Professor for Mathematics                 | LMU                                                       | Germany                                                    |
| Friese, Malte         | University Professor, Psychology          | Saarland University, Germany                              | Germany                                                    |
| Friesen, Sarah        |                                           | University of Victoria                                    | Canada                                                     |
| Friesen, Thomas       | Research Program Manager - Fisheries      | Oregon Department of Fish and Wildlife                    | United States of America (the)                             |
| Friesen, Vicki        | Professor of Biology                      | Queen's University                                        | Canada                                                     |
| Frieß, Udo            | Research Scientist, Environmental Physics | Institute of Environmental Physics, Heidelberg University | Germany                                                    |
| Frigon, Alain         | Associate Professor                       | Université de Sherbrooke                                  | Canada                                                     |
| Friman, Sonja         | PhD Student, Environmental Physics        | Institute of Environmental Physics, Heidelberg University | Germany                                                    |
| Fringer, John         | Environmental Engineer & Chemist          | U.S. NRC                                                  | United States of America (the)                             |
| Frings, Cornelia      | lecturer (Political Science)              | Institute of Political Science/JGU Mainz                  | Germany                                                    |
| Frisch, Ashley        | Research Coordinator (Marine Ecology)     | Reef HQ, Great Barrier Reef Marine Park Authority         | Australia                                                  |
| Frisch Jordan, Astrid | Biology                                   | Ecologia y Conservación de Ballenas, AC                   | Mexico                                                     |
| Frison, Gilles        | Researcher. Chemistry                     | CNRS                                                      | France                                                     |
| Frison, Eric          | MD, MPH                                   | CHU Bordeaux                                              | France                                                     |
| Fritsch, Clémentine   | Scientist in ecotoxicology                | UMR 6249 Chrono-environnement CNRS / UBFC                 | France                                                     |
| Fritsche, Immo        | Professor of Social Psychology            | University of Leipzig                                     | Germany                                                    |
| Fritz, Herve          | Senior Researcher                         | CNRS                                                      | France                                                     |
| Fritz, Martin         | PostDoc in Sociology                      | Friedrich Schiller University Jena                        | Germany                                                    |
| Frketić, Tea          | freshwater biologist                      |                                                           | Croatia                                                    |
| Fröbisch, Nadia       | Professor for Development and Evolution   | Museum für Naturkunde Berlin, Humboldt University Berlin  | Germany                                                    |
| FROCHOT, Isabelle     | Senior Lecturer                           | Université Savoie Mont Blanc                              | France                                                     |
| Froese, Jens G        | Biological invasions                      | CSIRO                                                     | Australia                                                  |
| Fröhlich, Marlen      | Postdoc at Department of Anthropology     | University of Zurich                                      | Switzerland                                                |
| Froidevaux, Jeremy    | PostDoc in Conservation Biology           | INRA                                                      | France                                                     |
| Froines, John         | Professor - Chemical Toxicology           | UCLA                                                      | United States of America (the)                             |
| Froitzheim, Nikolaus  | Professor of Geology                      | Universität Bonn                                          | Germany                                                    |
| Fromhage, Lutz        | Senior researcher in theoretical biology  | University of Jyväskylä                                   | Finland                                                    |
| Fromin, Nathalie      | senior researcher                         | CNRS                                                      | France                                                     |
| Frommolt, Karl-Heinz  | biologist                                 | Museum fuer Naturkunde Berlin                             | Germany                                                    |
| Frongia, Francesca    | PhD                                       | University of Modena and Reggio Emilia                    | Italy                                                      |
| Fronhofer, Emanuel A. | CNRS researcher                           | ISEM - CNRS - University of Montpellier                   | France                                                     |
| Frost, Evan           | Conservation Scientist / Ecologist        | Wildwood Consulting LLC                                   | United States of America (the)                             |
| Frost, Jonathan       | Semiconductor Laser Researcher            | Sheffield University,                                     | United Kingdom of Great Britain and Northern Ireland (the) |
| Frost, Pamela         | Vice President, Conservation Biologist    | Conservation Biology Institute                            | United States of America (the)                             |

|                         |                                                                  |                                                                                                                                                 |                                                            |
|-------------------------|------------------------------------------------------------------|-------------------------------------------------------------------------------------------------------------------------------------------------|------------------------------------------------------------|
| Froud, Karyn            | Director/Biosecurity Epidemiologist                              | Biosecurity Research Ltd                                                                                                                        | New Zealand                                                |
| Froy, Hannah            | Evolutionary ecologist                                           | Norwegian University of Science and Technology                                                                                                  | Norway                                                     |
| Frugone, María José     | Msc and PhD (c) in ecology and evolution                         | Universidad de Chile                                                                                                                            | Chile                                                      |
| Fruiht, Veronica        | Assistant Professor of Psychology                                | Dominican University of California                                                                                                              | United States of America (the)                             |
| fruitet, elise          | PhD student in evolutionary biology                              | Max Planck Insitute for Chemical Ecology                                                                                                        | Germany                                                    |
| Frumkin, Ron            | Ecological consultant                                            | Dr. Ron Frumkin, Ecological consultancy                                                                                                         | Israel                                                     |
| Fruth, Barara           | Behavioural Ecologist                                            | Livepool John Moores University                                                                                                                 | United Kingdom of Great Britain and Northern Ireland (the) |
| Fry, Gary               |                                                                  | Amphibian Ark                                                                                                                                   | Australia                                                  |
| Fryar, Sally            | Adjunct Senior Lecturer                                          | Flinders University                                                                                                                             | Australia                                                  |
| Fryer, Paul             | Adjunct Professor/ Geography                                     | University of Eastern Finland                                                                                                                   | Finland                                                    |
| Fuchs, Doris            | Professor of International Relations and Sustainable Development | University of Muenster                                                                                                                          | Germany                                                    |
| Fuchs, Heidi            |                                                                  | Lawrence Berkeley National Laboratory                                                                                                           | United States of America (the)                             |
| Fuchs, Jerome           | Maître de Conférences/Evolutionary Biology                       | ISYEB UMR7205 Museum National d’Histoire Naturelle, Paris                                                                                       | France                                                     |
| Fuchs, Stefan           | Scientific project assistant                                     | University of Vienna, Department of Botany and Biodiversity Research Division of Conservation Biology, Vegetation Ecology and Landscape Ecology | Austria                                                    |
| Fudge, Maree            | ECR Researcher                                                   | University of Tasmania                                                                                                                          | Australia                                                  |
| Fuentes, Alfredo        | Research associate/Botany                                        | Herbario Nacional de Bolivia                                                                                                                    | Bolivia (Plurinational State of)                           |
| Fuentes, Nicol          | PhD Biology                                                      | Universidad de Concepcion                                                                                                                       | Chile                                                      |
| Fuentes, Cilia L.       | Emeritus Professor; Agronomy-Weed Scientist                      | National University of Colombia                                                                                                                 | Colombia                                                   |
| Fuentes, Agustin        | Professor of Anthropology                                        | University of Notre Dame                                                                                                                        | United States of America (the)                             |
| Fuentes, Antonio        | Materials Science                                                | Cinvestav del IPN, Unidad Saltillo                                                                                                              | Mexico                                                     |
| Fuentes Claros, Alfredo | Research associate / Botanist                                    | Herbario Nacional de Bolivia                                                                                                                    | Bolivia (Plurinational State of)                           |
| Fueyo Mac Donald, Luis  | Jubilado                                                         | ISSSTE                                                                                                                                          | Mexico                                                     |
| Fugere, Vincent         | Postdoc                                                          | UQAM                                                                                                                                            | Canada                                                     |
| Fugger, Stefan          | PhD candidate, Glaciology/Hydrology                              | WSL                                                                                                                                             | Switzerland                                                |
| Fuhrman, Jed            | McCulloch Crosby Chair of Marine Biology                         | Univ of Southern California                                                                                                                     | United States of America (the)                             |
| Füllbrunn, Nadia        | PhD student                                                      | Department of Biology, Division Biochemistry, University of Osnabrück                                                                           | Germany                                                    |
| Fuller, Richard         | Professor                                                        | University of Queensland                                                                                                                        | Australia                                                  |
| Fuller, Andrea          | Professor of Physiology                                          | University of the Witwatersrand                                                                                                                 | South Africa                                               |
| Fulton, J. T.           | Biologist / Refuge Manager (retired)                             | US FWS                                                                                                                                          | United States of America (the)                             |
| Fulton, John            | Educator (ret): biology, ecology, physics                        | MUHSD                                                                                                                                           | United States of America (the)                             |
| Fulton, Graham          | Biologist                                                        | UQ                                                                                                                                              | Australia                                                  |
| Fumagalli, Luca         | Biologist                                                        | University of Lausanne                                                                                                                          | Switzerland                                                |
| Funicelli, Nicholas     | Professor Marine Science                                         | University of Florida                                                                                                                           | United States of America (the)                             |
| Funk, W. Chris          | Professor                                                        | Colorado State University                                                                                                                       | United States of America (the)                             |
| FURIAN, Sonia           | Geograph - retired                                               | University of São Paulo                                                                                                                         | Brazil                                                     |
| Furió, Marc             | Palaeontologist - Research                                       | Institut Català de Paleontologia Miquel Crusafont                                                                                               | Spain                                                      |

|                             |                                                            |                                                                                        |                                                            |
|-----------------------------|------------------------------------------------------------|----------------------------------------------------------------------------------------|------------------------------------------------------------|
| Furnival, Louise            | General Practitioner                                       | Nhs                                                                                    | United Kingdom of Great Britain and Northern Ireland (the) |
| Fürtges, Leon               | Analytical Chemist, PhD                                    |                                                                                        | Germany                                                    |
| Fuss, Thomas                | PhD candidate, Freshwater Ecology                          | Leibniz-Institute of Freshwater Ecology and Inland Fisheries                           | Germany                                                    |
| Fuster, Joan                | M.D. PhD                                                   | Àptima Centre Clinic                                                                   | Spain                                                      |
| Futhazar, Guillaume         | Law                                                        | Max Planck                                                                             | Germany                                                    |
| G, Pranavathiyani           | PhD Student                                                | Centre for Bioinformatics, Pondicherry University                                      | India                                                      |
| G Santos, Robson            | Associate Professor / Zoology and Conservation Biology     | Universidade Federal de Alagoas                                                        | Brazil                                                     |
| G. Valdecasas, Antonio      | Senior Researcher                                          | Museo Nacional de Ciencias Naturales                                                   | Spain                                                      |
| G. Zacho, Claus             |                                                            | Globe institute, Centre for GeoGenetics, University of Copenhagen                      | Denmark                                                    |
| G00d, Allen                 | Professor/Genetics                                         | University of Alberta                                                                  | Canada                                                     |
| Gäb, Fabian                 | PhD-Student - Geology                                      | University of Bonn                                                                     | Germany                                                    |
| Gabain, Isobel              | MSc One Health student                                     | Royal veterinary College                                                               | United Kingdom of Great Britain and Northern Ireland (the) |
| Gabandé-Rodríguez, Enrique  |                                                            | Centro de Biología Molecular Severo Ochoa                                              | Spain                                                      |
| Gabarro Prats, Carolina     | Research scientist                                         | CSIC                                                                                   | Spain                                                      |
| Gabellini, Aurelia          | Research assistant                                         |                                                                                        | Brazil                                                     |
| Gabor, Caitlin              | Professor of Biology                                       | Texas State University                                                                 | United States of America (the)                             |
| Gaboriau, Théo              | PostDoctoral fellow in evolutionary biology                | Université de Lausanne                                                                 | Switzerland                                                |
| Gabriel, Viktoria           | Assistant for Spacial Planning                             | TU Wien                                                                                | Austria                                                    |
| Gabrys, Sabine              | Professor for climate change and health                    | Potsdam Institute for Climate Impact Research and Charité - Universitätsmedizin Berlin | Germany                                                    |
| Gacek, Katarzyna            | Post doctoral researcher                                   | Plant Breeding and Acclimatization Institute National Research Institute               | Poland                                                     |
| GACHET, Sophie              | Ecology                                                    | Aix Marseille University                                                               | France                                                     |
| Gachon, Philippe            | Department of geography, climatologist                     | Université du Québec à Montréal                                                        | Canada                                                     |
| Gacia, Esperança            | Research Scientist, Ecology                                | CEAB-CSIC                                                                              | Spain                                                      |
| Gadda, Tatiana Maria        | Professor                                                  | UTFPR                                                                                  | Brazil                                                     |
| Gadgil, Ashok               | Professor                                                  | University of California, Berkeley                                                     | United States of America (the)                             |
| Gagen, Sonja                | Graduate Student Environmental Engineering                 | University of Michigan                                                                 | United States of America (the)                             |
| Gager, Leslie               | PhD student                                                | IUEM                                                                                   | France                                                     |
| Gager, Yann                 | Biology                                                    |                                                                                        | Germany                                                    |
| Gaget, Elie                 | Postdoctoral researcher-Conservation Biology               | University of Turkuk                                                                   | Finland                                                    |
| Gagliardi-Urrutia, Giussepe | Doctoral Student/ herpetology                              | Pontificia Universidade Católica do Rio Grande do Sul                                  | Peru                                                       |
| Gagnaire, Pierre-Alexandre  | Researcher                                                 | CNRS                                                                                   | France                                                     |
| Gagnon, Rhonda              | MES                                                        |                                                                                        | Canada                                                     |
| Gagnon, Patrick             | Professor of Marine Biology and Ecology                    | Memorial University of Newfoundland                                                    | Canada                                                     |
| Gagnon, Karine              | Post-doctoral researcher, Environmental and Marine Biology | Åbo Akademi University                                                                 | Finland                                                    |

|                                |                                                               |                                                                                             |                                |
|--------------------------------|---------------------------------------------------------------|---------------------------------------------------------------------------------------------|--------------------------------|
| Gagnon, Alyson                 | Master student                                                | Université du Québec à Chicoutimi                                                           | Canada                         |
| Gaidarenko, Olga               | Postdoctoral Researcher, Biology                              | UC Berkeley/HHMI                                                                            | United States of America (the) |
| Gailis, Janis                  | Senior researcher                                             | Latvia University of Life Sciences and Technologies                                         | Latvia                         |
| Gaillard, Camille              | Post-doctoral researcher in ecology, biogeography & modelling | Northern Arizona University                                                                 | United States of America (the) |
| Gailliton, Yves                | Horticulteur                                                  | Gailliton fleurs et plantes                                                                 | France                         |
| Gaiotto, Fernanda Amato        | Full Professor / Population Genetics                          | Universidade Estadual de Santa Cruz                                                         | Brazil                         |
| Gajardo, Gonzalo               | professor, Biodiversity                                       |                                                                                             | Chile                          |
| Gajewski, Piotr                | soil sciences                                                 | UPP Poznań                                                                                  | Poland                         |
| Gakhar, Lokesh                 | Associate Professor, Structural Biology                       | University of Iowa                                                                          | United States of America (the) |
| Galan, Carmen                  | Professor University on Botany                                | University of Cordoba                                                                       | Spain                          |
| Galante, Eduardo               | Professor of Zoology                                          | Research Institute CIBIO (Centro Iberoamericano de la Biodiversidad), Univertiy of Alicante | Spain                          |
| Galbany, Jordi                 | Adjunct Professor                                             | University of Barcelona                                                                     | Spain                          |
| Galbraith, Josie               | Avian ecologist & natural science curator                     | Auckland Museum                                                                             | New Zealand                    |
| Galbusera, Peter               | biologist researcher                                          | Centre for Research and Conservation                                                        | Belgium                        |
| GALEN, CANDACE                 | Professor                                                     | University of Missouri                                                                      | United States of America (the) |
| Galewski, Thomas               | Project Leader                                                | Tour du Valat Research Institute                                                            | France                         |
| Gali, Marti                    | Senior researcher                                             | Institut de Ciencies del Mar, ICM-CSIC                                                      | Spain                          |
| Galindo Cuervo, Aleidy Maritza | PhD student                                                   | Pontificia Universidade Católica do Rio Grande do Sul                                       | Brazil                         |
| Galipaud, Matthias             | Postdoc                                                       | university of Zurich                                                                        | Switzerland                    |
| Gall, Gabriella                | postdoctoral researcher                                       |                                                                                             | Germany                        |
| Gallagher, Michael             | Molecular biologist                                           | Whitehead Institute for Biomedical Research                                                 | United States of America (the) |
| Gallart, Francesc              | Research Professor, Hydrology                                 | IDAEA, CSIC (Spanish Research Council)                                                      | Spain                          |
| Gallaugh, Patricia             | Adjunct Professor, Biosciences                                | Simon Fraser University                                                                     | Canada                         |
| Galle, Sylvie                  | Senior researcher, water cycle in West Africa                 | IRD                                                                                         | France                         |
| Gallego-Abenza, Mario          | PhD candidate Cognitive Biology                               | University of Vienna                                                                        | Austria                        |
| Gallego-Gomez, Francisco       | Researcher, Material Science                                  | Spanish Research Council (CSIC)                                                             | Spain                          |
| Gallego-Zamorano, Juan         | PhD in Ecology and Conservation Biology                       | Radboud University                                                                          | Netherlands (the)              |
| Gallegos, Cristobal            | Evolutionary Ecology PhD Student                              | Monash University                                                                           | Australia                      |
| Galleman, Dieter               | Associate Director                                            | Nuvisan                                                                                     | Germany                        |
| Galle Perez, Aina              | PhD candidate on Synthetic Biology                            | MPI for Dynamics and Self-Organization                                                      | Germany                        |
| Gallet, Alison                 | PhD - Microbiology                                            | National museum of natural history of Paris                                                 | France                         |
| Gallet, Sébastien              | Associate Professor in Ecology                                | University of Brest                                                                         | France                         |
| GALLET, Christiane             | Pr                                                            | Laboratory of alpine ecology                                                                | France                         |
| Galli, Alessandro              | PhD                                                           | Global Footprint Network                                                                    | Switzerland                    |
| Galli, Loris                   | Zoology - Researcher                                          | Genoa University                                                                            | Italy                          |
| Gallo, Patricia                | Forest Policy and Development                                 | BluoVerda Deutschland e.V.                                                                  | Brazil                         |
| Gallo, Marta                   | Post-Doc                                                      | Politecnico di Torino                                                                       | Italy                          |
| Gallo, Stephen                 | Chief Scientist                                               | American Institute of Biological Sciences                                                   | United States of America (the) |
| Galloni, Marta                 | Associate Professor of Botany                                 | University of Bologna                                                                       | Italy                          |

|                             |                                                                   |                                                                         |                                                            |
|-----------------------------|-------------------------------------------------------------------|-------------------------------------------------------------------------|------------------------------------------------------------|
| Galobart, Àngel             | Head of Mesozoic Research Group                                   | Institut Català de Paleontologia Miquel Crusafont                       | Spain                                                      |
| Galt, Ryan                  | Professor, Department of Human Ecology & Geography Graduate Group | University of California, Davis                                         | United States of America (the)                             |
| Galvão, Cleber              | Researcher                                                        | Fiocruz                                                                 | Brazil                                                     |
| Galvez, Rosa                | Full professor civil environmental engineering                    | Laval University                                                        | Canada                                                     |
| Galvez Ruiz, David          | Professor                                                         | Departament pf Statistics an Operational Research                       | Spain                                                      |
| Galvez-Bravo, Lucia         | Lecturer in Conservation Ecology                                  | Liverpool John Moores University                                        | United Kingdom of Great Britain and Northern Ireland (the) |
| Gálvez-Valdivieso, Gregorio | Assistant Professor in Plant Physiology                           | Universidad de Córdoba                                                  | Spain                                                      |
| Gamache, Robert             | Professor of Atmospheric Science                                  | University of Massachusetts Lowell                                      | United States of America (the)                             |
| Gamba, Marco                | Ass. Professor - Zoology                                          | University of Torino                                                    | Italy                                                      |
| Gambetta, Maria Cristina    | Assistant Professor in Epigenetics                                | University of Lausanne                                                  | Switzerland                                                |
| GAMBETTA, Gregory           | Professor of Viticulture                                          | Bordeaux Sciecnas Agro / Institut des Sciences de la Vigne et du Vin    | France                                                     |
| Gambi, Maria Cristina       | Associate Researcher                                              | National Institute of Oceanography and Applied Geophysics, OGS, Trieste | Italy                                                      |
| Gamboa, Fabrice             | Professor Mathematics                                             | Institut de Mathématiques de Toulouse                                   | France                                                     |
| Gamboa Alurralde, Santiago  | Biologist                                                         | Universidad Nacional de Tucumán                                         | Argentina                                                  |
| GAMERO RUS, JESUS MARCOS    | ASSOCIATE PROFESSOR IN GLOBAL ENVIRONMENTAL CHALLENGES            | UNIVERSIDAD CARLOS III DE MADRID                                        | Spain                                                      |
| Gamfeldt, Lars              | Lecturer                                                          | University of Gothenburg                                                | Sweden                                                     |
| Gamito, Sofia               | Assistant Professor                                               | University of Algarve                                                   | Portugal                                                   |
| Gammage, Tom                | Marine Social Scientist (PhD Candidate)                           | James Cook University                                                   | United Kingdom of Great Britain and Northern Ireland (the) |
| Gammon, Richard             | Professor Emeritus, Chemistry and Oceanography                    | University of Washington                                                | United States of America (the)                             |
| Ganapathi, Geetha           | Professor                                                         | P S G College of Technology                                             | India                                                      |
| Ganault, Jeanne             | PhD Student in Sociology                                          | CREST                                                                   | France                                                     |
| Gandin, Anthony             | Assistant Professor                                               |                                                                         | France                                                     |
| Ganem, Guila                | Researcher Evolutionary Ecology                                   | CNRS, Montpellier University ISEM                                       | France                                                     |
| Gangloff, Benoit            | ecology                                                           |                                                                         | France                                                     |
| Gangloff, Eric              | Assistant Professor of Zoology                                    | Ohio Wesleyan University                                                | United States of America (the)                             |
| Ganguli, Poulomi            | Agricultural & Food Engineering                                   | Indian Institute of Technology Kharagpur                                | India                                                      |
| Ganguly, Sunayana           | Political Scientist                                               | Climate Educator network                                                | India                                                      |
| Ganivet, Elias              | Independant scholar                                               |                                                                         | France                                                     |
| Ganseforth, Sonja           | Senior Research Fellow                                            | German Institute for Japanese Studies (DIJ), Tokyo                      | Japan                                                      |
| Gantner, Gösta              | Research Fellow                                                   | University of Heidelberg, Theological Departement                       | Germany                                                    |
| Ganz, Selina                | Environmental Science                                             | Forest Research Institute                                               | Germany                                                    |
| Garabedian, James           | Wildlife and Conservation Biology                                 | North Carolina State University                                         | United States of America (the)                             |
| Garamszegi, László Zsolt    | director                                                          | Centre for Ecological Research, Institute of Ecology and Botany         | Hungary                                                    |
| Garand, Marie-Josee         | Soil Science                                                      |                                                                         | Canada                                                     |
| Garay, Adriana              | Researcher                                                        | UNAM                                                                    | Mexico                                                     |

|                               |                                                              |                                                                                   |                                                            |
|-------------------------------|--------------------------------------------------------------|-----------------------------------------------------------------------------------|------------------------------------------------------------|
| Garbe, Julius                 | Ice sheet modeler / PhD candidate                            | Potsdam Institute for Climate Impact Research                                     | Germany                                                    |
| Garcia, Beatriz               | Professor, Astronomer                                        | National technological University, CONICET                                        | Argentina                                                  |
| Garcia, Leticia               | Professor / Restoration Ecology                              | University of Mato grosso do Sul (UFMS)                                           | Brazil                                                     |
| Garcia, Sarahi                | Researcher                                                   | Uppsala University                                                                | Sweden                                                     |
| Garcia, Melissa               | Research Fellow                                              | University of Adelaide                                                            | Australia                                                  |
| Garcia, Edenise               | Deputy Science Manager                                       | The Nature Conservancy                                                            | Brazil                                                     |
| Garcia, Maxime                | PhD in Bioinformatics                                        | Karolinska institutet                                                             | Sweden                                                     |
| Garcia, Junior                | Professor Associate                                          | Federal University of Paraná                                                      | Brazil                                                     |
| Garcia, Lucas                 | PhD Candidate in Sustainability                              | Memorial University of Newfoundland                                               | Brazil                                                     |
| Garcia, Nuno                  | Associate Professor with Habilitation / Computer Science     | Universidade da Beira Interior                                                    | Portugal                                                   |
| Garcia, Juana                 | Associate Professor                                          | Universidad de los Andes                                                          | Colombia                                                   |
| García, Francisca C.          | Associate research fellow                                    | University of Exeter                                                              | United Kingdom of Great Britain and Northern Ireland (the) |
| García, Daniel                | Senior Lecturer of Ecology                                   | Universidad de Oviedo                                                             | Spain                                                      |
| García Criado, Mariana        | PhD Researcher                                               | The University of Edinburgh                                                       | United Kingdom of Great Britain and Northern Ireland (the) |
| Garcia Fernandez, Juan Carlos | Engineer                                                     | Airbus                                                                            | Spain                                                      |
| García García, Brisol         |                                                              | Universidad de Guanajuato                                                         | Mexico                                                     |
| Garcia Hernandez, Diana Edisa | PhD student                                                  | University of Groningen                                                           | Netherlands (the)                                          |
| Garcia Mijares, Miriam        | Professor /Experimental Psychology                           | University of São Paulo                                                           | Brazil                                                     |
| Garcia Molina, Marta          | Research Technician, Paleoclimatology                        | CEREGE. Aix-Marseille University                                                  | France                                                     |
| García Robles, Helena         | Researcher                                                   | University of Granada                                                             | Spain                                                      |
| Garcia Rodrigues, João        | Researcher - Social-ecological systems                       | Facultade de Ciencias Políticas e Sociais, Universidade de Santiago de Compostela | Spain                                                      |
| Garcia Salom, Miguel          | Professor of Physiology (retired)                            | Universidad de Murcia (Spain)                                                     | Spain                                                      |
| García Salom, Miguel          | Professor of Physiology                                      | Universidad de Murcia                                                             | Spain                                                      |
| Garcia Saravia, Cris          | PhD Researcher in Circular Economy                           | Maastricht University                                                             | Netherlands (the)                                          |
| Garcia Silveira, Daniel       | PhD Student                                                  | Doñana Biological Station                                                         | Spain                                                      |
| Garcia- Gomez, Beatriz        | PhD student in Oceanography                                  | Universite Grenoble ALpes                                                         | Mexico                                                     |
| Garcia-Aguilar, María         | Biologist                                                    | CICESE                                                                            | Mexico                                                     |
| García-Alaminos, Ángela       | PhD student, Economics                                       | University of Castilla-La Mancha                                                  | Spain                                                      |
| García-Berthou, Emili         | Professor of Ecology                                         | University of Girona                                                              | Spain                                                      |
| García-Callejas, David        | Postdoctoral researcher                                      | Doñana Biological Station, CSIC                                                   | Spain                                                      |
| García-Charton, José Antonio  | Associate Professor of Ecology                               | University of Murcia                                                              | Spain                                                      |
| Garcia-Estrada, Carlos        | Researcher (Biotechnology)                                   | INBIOTEC, Instituto de Biotecnología de León                                      | Spain                                                      |
| Garcia-Gonzalez, Francisco    | Senior scientist (Científico Titular) - Evolutionary Biology | Estación Biológica de Donana (Spanish Research Council)                           | Spain                                                      |
| García-Guzmán, Graciela       | Researcher/Ecology and Evolution                             | Universidad Nacional Autónoma de México                                           | Mexico                                                     |
| Garcia-Macias, Antonio        | Full-time Researcher, Computer Science                       | CICESE Research Center                                                            | Mexico                                                     |
| Garcia-Mijares, Miriam        | Professor                                                    | University of São Paulo                                                           | Brazil                                                     |
| Garcia-Mouton, Cristina       | PhD student                                                  | Complutense University of Madrid                                                  | Spain                                                      |



|                                 |                                             |                                                                                          |                                                            |
|---------------------------------|---------------------------------------------|------------------------------------------------------------------------------------------|------------------------------------------------------------|
| García-Orta, Luis M.            | Environmental Science Professor             | Puerto Rico Institute Technology - Ponce Campus                                          | Puerto Rico                                                |
| Garcia-Pausas, Jordi            | Postdoc, Ecology                            | Forest Science Centre of Catalonia (CTFC)                                                | Spain                                                      |
| García-Roger, Eduardo M.        | Assistant professor in Ecology              | Universitat de València                                                                  | Spain                                                      |
| Garcia-Saez, Isabel             | Researcher                                  | CNRS                                                                                     | France                                                     |
| García-Salgado, Gonzalo         | PhD, Ecology                                | Freelance                                                                                | Spain                                                      |
| García-Timmermans, Cristina     | PhD researcher in Bioscience Engineering    | Ghent University                                                                         | Belgium                                                    |
| García-Valdés, Raúl             | Postdoc                                     | CREAF                                                                                    | Spain                                                      |
| García-Velásquez, Carlos Andrés | PhD Candidate                               | Maastricht University                                                                    | Netherlands (the)                                          |
| García-Vidal, Jorge             | Professor Computer Science                  | Universitat Politècnica de Catalunya (Barcelona, Spain)                                  | Spain                                                      |
| Garcia-Vozmediano, Aitor        | Phd student in Veterinary Sciences          | University of Turin                                                                      | Italy                                                      |
| GARCON, Véronique               | CNRS Senior Scientist                       | Centre National de la Recherche Scientifique                                             | France                                                     |
| Garczarek, Laurence             | Senior Researcher                           | CNRS                                                                                     | France                                                     |
| Gardali, Thomas                 | Ecologist                                   | Point Blue Conservation Science                                                          | United States of America (the)                             |
| Gardarin, Antoine               | Agroecology                                 | AgroParisTech                                                                            | France                                                     |
| Garde, Baptiste                 | PhD Student in Animal Behaviour and Ecology |                                                                                          | France                                                     |
| Gardes, Monique                 | Professor                                   | University of Toulouse                                                                   | France                                                     |
| Gardiner, Matthew               | Researcher: primatology                     | University of Lethbridge, Canada                                                         | United Kingdom of Great Britain and Northern Ireland (the) |
| Gardiner, Riana                 |                                             | University of Sunshine Coast                                                             | Australia                                                  |
| Gardiner, Christine Perala      | Geography                                   | Portland State University, retired                                                       | United States of America (the)                             |
| Gardiner, Dr. Christine         | Principal,                                  | WaterCycle LLC, (ex Middlesex Univ UK, Portland State Univ.)                             | United States of America (the)                             |
| Gardiner, Dr. John              | Chief Bioengineer                           | River Docs (ex-Imperial College, Southampton & Middlesex Univs and Portland State Univ.) | United States of America (the)                             |
| Gardner, Charlie                | Lecturer in Conservation Biology            | University of Kent                                                                       | United Kingdom of Great Britain and Northern Ireland (the) |
| Gardner, Kathryn                | Conservation Biology MSc candidate          | University of Cape Town                                                                  | South Africa                                               |
| Garduño-Juárez, Ramón           | Research Professor                          | Universidad Nacional Autónoma de México                                                  | Mexico                                                     |
| Garey, Michel                   | Professor - Ecology                         | Universidade Federal da Integração Latino-Americana                                      | Brazil                                                     |
| Garilleti, Ricardo              | Professor, Botany                           | University of Valencia                                                                   | Spain                                                      |
| Garnier, Julie                  | Biodiversity Conservation                   | Odyssey Conservation Trust                                                               | France                                                     |
| Garnier, Josette                | Research Director, Biogeochemistry          | CNRS                                                                                     | France                                                     |
| Garnier, Eric                   | Research Director - Plant ecology           | Centre National de la Recherche Scientifique                                             | France                                                     |
| Garnier, Lisa                   | Ecology                                     |                                                                                          | France                                                     |
| Garnier, Aurélie                | Postdoc                                     | Institute for Marine Ecosystem and Fisheries Sciences                                    | Germany                                                    |
| Garnier, Monica                 | Researcher                                  | National Research Council, Water Research Institute                                      | Italy                                                      |
| Garnier, Emmanuel               | Research Professor                          | CNRS                                                                                     | France                                                     |
| GARNIER, Lisa K. M.             | Research director                           | RTE                                                                                      | France                                                     |
| Garrabou, Joaquim               | Senior Researcher                           | Spanish Research Council CSIC                                                            | Spain                                                      |
| Garran, Thomas                  | Agroecology                                 | China Academy of Chinese Medical Sciences                                                | China                                                      |
| Garrick, Michael                | Professor Biochemistry                      | University at Buffalo                                                                    | United States of America (the)                             |

|                              |                                                                    |                                                                                    |                                                            |
|------------------------------|--------------------------------------------------------------------|------------------------------------------------------------------------------------|------------------------------------------------------------|
| Garrigue, Claire             | Senior scientits                                                   | IRD                                                                                | New Caledonia                                              |
| Garrill, Ashley              | Associate Professor                                                | University of Canterbury                                                           | New Zealand                                                |
| Garrison, Julie              | PhD candidate, Marine Biology                                      | Stockholm University                                                               | Sweden                                                     |
| Garteizgogeoasca, María      | PhD                                                                | Artec Forschungszentrum Nachhaltigkeit                                             | Germany                                                    |
| Garvey, Patrick              | Scientist                                                          | Landcare Research (MWLR)                                                           | New Zealand                                                |
| Garza, Erin                  | Staff scientist in Synthetic biology                               | J. Craig Venter Institute                                                          | United States of America (the)                             |
| Garza-Perez, Joaquin Rodrigo | Professor, Coral Reefs, GIS, Remote Sensing                        | UNAM                                                                               | Mexico                                                     |
| Garzoli, Laura               | Post Doc, Biologist, Ecologist                                     | University of Pavia                                                                | Italy                                                      |
| Gascoin, Simon               | research scientist                                                 | CNRS                                                                               | France                                                     |
| Gascon Gubieda, Alicia       | PhD Researcher in Cell Biology                                     | Newcastle University                                                               | United Kingdom of Great Britain and Northern Ireland (the) |
| GASCUEL, Didier              | Prof. in marie ecology                                             | Agrocampus Ouest                                                                   | France                                                     |
| Gaskell, Benjamin Henry      | Natural historian and mechanical engineer                          |                                                                                    | United Kingdom of Great Britain and Northern Ireland (the) |
| Gaspar, Augusta              | Professor                                                          | Universidade Catolica Portuguesa                                                   | Portugal                                                   |
| Gaspard, François            | PhD Student                                                        | Earth & Life Institute, UCLouvain                                                  | Belgium                                                    |
| Gašparović, Blaženka         | Senior scientist                                                   | Ruđer Bošković Institute                                                           | Croatia                                                    |
| Gasselin, Pierre             | Geographer                                                         | French National Institute of Agricultural Research (INRA)                          | France                                                     |
| Gatenby, Anthony             | Senior Fellow in Molecular Biology                                 | Coskata                                                                            | United States of America (the)                             |
| Gatt, Jurgen R.              | Doctor of Medicine and Doctor in History and Philosophy of Science | University of Malta; St. James Hospital                                            | Malta                                                      |
| Gatti, Marco                 | PhD student                                                        | IFAE                                                                               | Spain                                                      |
| Gatti, jean-luc              | DR2 biochemistry                                                   | Institut National Recherche Agronomique                                            | France                                                     |
| Gatto, Laurent               | Professor of bioinformatics                                        | UCLouvain                                                                          | Belgium                                                    |
| Gattuso, Jean-Pierre         | Research Professor (Oceanography)                                  | CNRS, Sorbonne University, Iddri                                                   | France                                                     |
| Gaul, Liam                   | PhD student                                                        | The Francis Crick Institute                                                        | United Kingdom of Great Britain and Northern Ireland (the) |
| Gauld, Jethro                | PhD Student                                                        | University of East Anglia                                                          | United Kingdom of Great Britain and Northern Ireland (the) |
| Gaume, Laurence              | Researcher / Ecology                                               | CNRS / University of Montpellier                                                   | France                                                     |
| Gauquelin, Thierry           | Professor Ecology, Biodiversity, climate change                    | Institut Méditerranéen de Biodiversité et Ecologie, Aix Marseille University, CNRS | France                                                     |
| GAURAV, Dr. VIVEK            | RESEARCHER, ENVIRONMENTAL ENGINEERING                              | INDIAN INSTITUTE OF TECHNOLOGY ROORKEE                                             | India                                                      |
| GAURAV, NITIKA               | Phd Research Scholar                                               | Indian Institute of technology Delhi                                               | India                                                      |
| Gautier, Stéfani             | researcher                                                         | earthwatch                                                                         | United Kingdom of Great Britain and Northern Ireland (the) |
| Gautier, Elsa                | Research engineer                                                  | CNRS                                                                               | France                                                     |
| Gavai, Anand                 | Senior Scientist Food Safety Data                                  | Wageningen Food Safety Research                                                    | Netherlands (the)                                          |
| Gavilano, Alexandra          | Research Scientist                                                 | Centre for Development and Environment, University of Bern                         | Switzerland                                                |
| Gavito Pardo, Mayra Elena    | Senior researcher                                                  | Universidad Nacional Autónoma de México                                            | Mexico                                                     |

|                           |                                                                                                                      |                                                                                               |                                                            |
|---------------------------|----------------------------------------------------------------------------------------------------------------------|-----------------------------------------------------------------------------------------------|------------------------------------------------------------|
| Gavrichkova, Olga         | Researcher                                                                                                           | National Research Council                                                                     | Italy                                                      |
| Gawenda, Michael          | Surgeon                                                                                                              | St Antonius Hospital                                                                          | Germany                                                    |
| Gay Garcia, Carlos        | Researcher/ Atmospheric Sciences                                                                                     | Universidad Nacional Autonoma de Mexico/UNAM                                                  | Mexico                                                     |
| Gayà-Vidal, Magdalena     | Postdoctoral Researcher                                                                                              | Research Center in Biodiversity and Genetic Resources (CIBIO)                                 | Portugal                                                   |
| Gayeski, Nick             | Fisheries Scientist                                                                                                  | Wild Fish Conservancy                                                                         | United States of America (the)                             |
| Gaysina, Darya            | Senior Lecturer in Psychology                                                                                        | University of Sussex                                                                          | United Kingdom of Great Britain and Northern Ireland (the) |
| Gazave, Eve               | Researcher                                                                                                           | CNRS                                                                                          | France                                                     |
| Gazzana Barros, Gabriel   | PhD student                                                                                                          | National Institute of Amazonia Research - INPA                                                | Brazil                                                     |
| Gazzola, Andrea           | Wildlife biologist                                                                                                   | Association for the Conservation of Biological Diversity (ACDB)                               | Romania                                                    |
| Ge, Ruowen                | Associate Professor                                                                                                  | National University of Singapore                                                              | Singapore                                                  |
| Gebauer, Tobias           | Assistant Professor Plant Ecology and Ecosystem Research                                                             | University of Freiburg, Geobotany                                                             | Germany                                                    |
| Gebhardt, Stefan          | Priv.-Doz. Dr., Affiliate scientist, Medicine                                                                        | University of Marburg                                                                         | Germany                                                    |
| GEBREKIRO, Solomon Tesfay | PhD student/Biology                                                                                                  | KU Leuven/Mekelle University                                                                  | Ethiopia                                                   |
| GEBREYES, WONDWOSSEN      |                                                                                                                      | The Ohio State University                                                                     | United States of America (the)                             |
| Geens, Bart               | Junior PhD student, molecular biology                                                                                | KU Leuven                                                                                     | Belgium                                                    |
| Geffroy, Françoise        | engineer                                                                                                             | CEA                                                                                           | France                                                     |
| Gehan, Charlotte          | Postdoctoral researcher in Astrophysics                                                                              | Centro de Astrofísica da Universidade do Porto, Instituto de Astrofísica e Ciências do Espaço | Portugal                                                   |
| Gehrels, Roland           | Professor in Physical Geography                                                                                      | University of York                                                                            | United Kingdom of Great Britain and Northern Ireland (the) |
| Geigle, Klaus Peter       | Combustion Scientist                                                                                                 | German Aerospace Center (DLR)                                                                 | Germany                                                    |
| Geijzendorffer, Ilse      | Senior researcher and coordinator of the Mediterranean Wetland Observatory                                           | Tour du Valat                                                                                 | France                                                     |
| Geipel, Inga              | Postdoctoral Researcher, Biologist                                                                                   | Smithsonian Tropical Research Institute                                                       | Panama                                                     |
| Geise, Lena               | Associate Professor                                                                                                  | State University of Rio de Janeiro                                                            | Brazil                                                     |
| Geisen, Carla             | PhD Candidate                                                                                                        | LOCEAN-IPSL, Sorbonne Université                                                              | France                                                     |
| Geiser, Franziska         | Professor, Psychosomatic Medicine and Psychotherapy                                                                  | University of Bonn                                                                            | Germany                                                    |
| Geissbühler, David        | Research Associate in Machine Learning and Computer Vision. Prev. Theoretical Physics and Computational Engineering. | Idiap Research Institut                                                                       | Switzerland                                                |
| Geldermans, Bob           | Researcher Circularity in the Built Environment                                                                      | Delft University of Technology                                                                | Netherlands (the)                                          |
| Gelmini, Ylenia           | PhD candidate in Hydrology                                                                                           | University of Padova                                                                          | Italy                                                      |
| Gelsthorpe, David         | Museum Geology Curator                                                                                               | Manchester Museum                                                                             | United Kingdom of Great Britain and Northern Ireland (the) |
| Gembris, Dr. Daniel       | Lecturer/Teaching professor                                                                                          | University of cooperative education Saxony                                                    | Germany                                                    |
| Gemmell, Ed               | Jurisprudence                                                                                                        | Law Society of England and Wales                                                              | United Kingdom of Great Britain and Northern Ireland (the) |
| Gemmell, Neil             | Distinguished Professor of Reproduction and Genomics                                                                 | University of Otago                                                                           | New Zealand                                                |

|                         |                                                             |                                                                          |                                                            |
|-------------------------|-------------------------------------------------------------|--------------------------------------------------------------------------|------------------------------------------------------------|
| Genaro, Julio A         | Entomology                                                  | Caribbean Natural History Group                                          | Canada                                                     |
| Genes, Luísa            | PhD Student - Biology                                       | Stanford University                                                      | Brazil                                                     |
| GENIN, Didier           | Research Scientist                                          | Institut de Recherche pour le Développement (IRD)                        | France                                                     |
| GENISSEL, Anne          | Researcher                                                  | INRAE                                                                    | France                                                     |
| Gennari, Giulia         | PhD student in Neuroscience                                 | Neurospin (CEA Saclay, Paris)                                            | France                                                     |
| Génot, Benoît           | Engineer, Hydrology                                         | IRSTEA                                                                   | France                                                     |
| Genoud, Michel          | External Scientific Collaborator, Physiological Ecology     | Department of Ecology and Evolution, University of Lausanne              | Switzerland                                                |
| Genovese, Cristina      | PhD candidate                                               | University of Hobart (UTAS-IMAS)                                         | Australia                                                  |
| Gensel, Julia           | PhD student in Organic Geochemistry                         | MARUM - Center for Marine Environmental Sciences, University of Bremen   | Germany                                                    |
| Genthon, Christophe     | Research scientist                                          | Centre National de la Recherche Scientifique                             | France                                                     |
| Gentile, Benjamin       | Graduate student in Molecular Biology (PhD)                 | University of Milwaukee Wisconsin                                        | United States of America (the)                             |
| Genyn, Hanne            | Policy and Advocacy Fellow & Public Health Graduate Student |                                                                          | United States of America (the)                             |
| George, Amrita          | Research Scientist                                          | University of Colorado                                                   | United States of America (the)                             |
| George, Marina          | Graduate Assistant                                          | University of Hawaii at Manoa                                            | United States of America (the)                             |
| George, T. Luke         | Research Associate, Lecturer                                | Colorado State University                                                | United States of America (the)                             |
| George, Luke            | Adjunct Faculty                                             | Colorado State University                                                | United States of America (the)                             |
| Georges, Arthur         | Distinguished Professor in Applied Ecology                  | University of Canberra                                                   | Australia                                                  |
| Georgian, Samuel        | Marine Biology                                              | Marine Conservation Institute                                            | United States of America (the)                             |
| Georgiev, Iskren        | Postdoc                                                     | Max Planck institute for astronomy (MPIA)                                | Germany                                                    |
| Gepts, Paul             | Distinguished Professor, Plant Sciences                     | University of California, Davis                                          | United States of America (the)                             |
| Géraldine, Loot         | Professor Ecology & Biology                                 | University Toulouse III                                                  | France                                                     |
| GERANT, Dominique       | Assistant Professor - Tree physiologist                     | Lorraine University                                                      | France                                                     |
| gerard, chantal         |                                                             | CNRS                                                                     | France                                                     |
| Gerard, Philippa        | Senior Scientist                                            | AgResearch                                                               | New Zealand                                                |
| Gerard, Jean-François   | Researcher - Wildlife Behaviour and Ecology                 | INRA                                                                     | France                                                     |
| GERARD, Bastien         | biologist engineer                                          | INRA                                                                     | France                                                     |
| GERARD, Pierre          | Lecturer, Evolutionary biology                              | AgroParisTech                                                            | France                                                     |
| gerbault, muriel        | senior researcher                                           | Institute for Research and Development                                   | France                                                     |
| Gerber, AURONA          | MSc Student                                                 | University of Pretoria                                                   | South Africa                                               |
| Gerber, Sophie          | Researcher - Plant genetics & Philosophy of biology         | Inra - Université de Bordeaux                                            | France                                                     |
| Geremew, Amare Gebeyehu | Olericulturist                                              | RZ                                                                       | Ethiopia                                                   |
| Gerhardt, Karin         | Researcher sustainable food systems                         | Swedish Biodiversity Centre, Swedish University of Agricultural Sciences | Sweden                                                     |
| Gerhartz, Ingo          | doctor philosophiae                                         | JGU Mainz                                                                | Germany                                                    |
| Gerli, Cristina         | PhD student / Glaciology                                    | Northumbria University                                                   | United Kingdom of Great Britain and Northern Ireland (the) |
| Germain, Veronique      | assistant professor                                         | university of Bordeaux                                                   | France                                                     |
| Germain, Marion         | Post Doctoral Research Associate                            | The University of Sheffield                                              | United Kingdom of Great Britain and Northern Ireland (the) |

|                               |                                                     |                                                                                                            |                                                            |
|-------------------------------|-----------------------------------------------------|------------------------------------------------------------------------------------------------------------|------------------------------------------------------------|
| Gernaat, MD, PhD, Hajo        | Research Associate                                  | Naturalis Biodiversity Center, Leiden                                                                      | Netherlands (the)                                          |
| Gerold, Stefanie              | Research associate                                  | TU Berlin                                                                                                  | Germany                                                    |
| Gerringer, Mackenzie          | Assistant Professor of Biology                      | SUNY Geneseo                                                                                               | United States of America (the)                             |
| Gerstenhöfer, Anna            | Humanmedizin                                        | Phillipsuniversität Marburg                                                                                | Germany                                                    |
| Geschke, Jonas                | Environmental Sciences, Science-Policy              | Museum für Naturkunde Berlin                                                                               | Germany                                                    |
| Geslin, Benoît                | Lecturer in Ecology                                 | IMBE, Aix Marseille Univ, Avignon Université, CNRS, IRD, Marseille, France                                 | France                                                     |
| Gessler, Arthur               | Professor                                           | Swiss Federal Research Institute WSL                                                                       | Switzerland                                                |
| Gessner, Mark O.              | Professor of Applied Aquatic Ecology                | Leibniz Institute of Freshwater Ecology and Inland Fisheries & Technische Universität Berlin               | Germany                                                    |
| Getzner, Michael              | Economist, Chair, Institute of Spatial Planning     | Vienna University of Technology (TU Wien)                                                                  | Austria                                                    |
| Geuer, Jana                   | Marine Chemist                                      | Alfred Wegener Institute for Polar and Marine Research, Bremerhaven                                        | Germany                                                    |
| Gévaudan, Manon               | PhD in Oceanography                                 | LEGOS                                                                                                      | France                                                     |
| Ghachoui, Mourad              | Astronomie                                          | Cadi Ayyad University                                                                                      | Morocco                                                    |
| Ghahremanpour, Mohammad       | Postdoctoral Associate                              | Yale University                                                                                            | United States of America (the)                             |
| Ghali, Karim                  | Phd student in Ecology and Evolution                |                                                                                                            | Switzerland                                                |
| Ghan, Steven                  | Climate Scientist                                   |                                                                                                            | United States of America (the)                             |
| Ghanate, Avinash              | Postdoctoral Training Fellow                        | The Francis Crick Institute                                                                                | United Kingdom of Great Britain and Northern Ireland (the) |
| Ghasemi, Omidreza             | PhD Candidate                                       | Macquarie University                                                                                       | Australia                                                  |
| Gherairi, Josephine           | Educational Psychology, researcher                  | University of Rostock                                                                                      | Germany                                                    |
| Gherardi, Jeanne              | Associate Professor                                 | Université Versailles St Quentin / LSCE                                                                    | France                                                     |
| Gherardi-Fuentes, Camila      | Marine Biologist                                    | Universidad Austral de Chile                                                                               | Chile                                                      |
| Ghezal, Amina                 | PhD Student in Politics                             | University of Exeter                                                                                       | United Kingdom of Great Britain and Northern Ireland (the) |
| Ghilardi, Mattia              | PhD student                                         | Leibniz Centre for Tropical Marine Research                                                                | Germany                                                    |
| Ghirardi, Romina              | Researcher                                          | Instituto Nacional de Limnología (CONICET-UNL)                                                             | Argentina                                                  |
| Gholamahmadi, Behrouz         | PhD Student - Environmental Science and Engineering | University of Aveiro                                                                                       | Portugal                                                   |
| Ghura, Hiba                   | Phd Student                                         | Max Planck Institute for medical research                                                                  | Germany                                                    |
| Giacomin, Leandro             | Professor of Botany                                 | Universidade Federal do Oeste do Pará                                                                      | Brazil                                                     |
| Giallongo, Sebastiano         | PhD student in biomedical sciences                  | FNUSA ICRC                                                                                                 | Czech Republic (the)                                       |
| Giandoreggio-Barranco, Karine | Engineer assistant                                  | Structural Biology Institute                                                                               | France                                                     |
| Gianeti, Michel               |                                                     | Universidade de São Paulo                                                                                  | Brazil                                                     |
| Gianfranceschi, Luca          | Associate Professor, Genetics                       | University of Milan                                                                                        | Italy                                                      |
| Giannetti, Francesca          | Post doc fellowship                                 | University of Florence                                                                                     | Italy                                                      |
| Gianni, Fabrizio              | Postdoc - Marine ecology                            | OGS                                                                                                        | Italy                                                      |
| Gianni, Giuseppe              | PhD Biology                                         | Independent Consultant                                                                                     | Germany                                                    |
| Giannini, Gianrossano         | Full Professor of Nuclear and Subnuclear Physics    | Italian Nuclear Physics Institute (INFN Senior Associate Researcher) and Trieste University (retired from) | Italy                                                      |
| Giaremis, Stefanos            | PhD student - Computational Materials Science       | Aristotle University of Thessaloniki                                                                       | Greece                                                     |

|                         |                                                                          |                                                            |                                                            |
|-------------------------|--------------------------------------------------------------------------|------------------------------------------------------------|------------------------------------------------------------|
| Gibb, Gillian           | Genomics                                                                 | Massey University                                          | New Zealand                                                |
| Gibbons, Luke           | Master of Science                                                        | Manchester Metropolitan University                         | United Kingdom of Great Britain and Northern Ireland (the) |
| Gibbs, Allen G.         | Professor, School of Life Sciences                                       | University of Nevada, Las Vegas                            | United States of America (the)                             |
| Gibeau, Pascale         | PhD Candidate, Ecology                                                   | Simon Fraser University                                    | Canada                                                     |
| Gibert, Ricardo         | Graduate Student                                                         | California State University Northridge                     | United States of America (the)                             |
| Gibertoni, Tatiana      | Professor                                                                | Universidade Federal de Pernambuco                         | Brazil                                                     |
| Giblin, Anne            | Senior Scientist                                                         | Marine Biological Laboratory                               | United States of America (the)                             |
| Gibout, Stéphane        | Associate Professor / physics                                            | LaTEP / ENSGTI / UPPA - Pau                                | France                                                     |
| Gibson, Kara            | PhD Student, Biological Sciences                                         | Northern Arizona University                                | United States of America (the)                             |
| Gibson, David           | Professor of Plant Biology                                               | Southern Illinois University Carbondale                    | United States of America (the)                             |
| Gibson, Louise          | Forensics and Biochemistry                                               | Institute of Zoology                                       | United Kingdom of Great Britain and Northern Ireland (the) |
| Gibson, Gary            | Retired biologist                                                        | Ms.                                                        | United States of America (the)                             |
| Gicquel, Morgane        | PhD Student, Behavioural and Evolutionary Ecology                        | Leibniz Institute for Zoo and Wildlife Research (IZW)      | Germany                                                    |
| Gideon, Osia            | Professor in Forestry                                                    | PNG University of Technology                               | Papua New Guinea                                           |
| GIDOIN, Cindy           | Ecology and evolution                                                    | University of Zurich                                       | France                                                     |
| Gielen, Marie-Charlotte | PhD Student in Ecology                                                   | Université Catholique de Louvain                           | Belgium                                                    |
| Gierkink, Max           | Manager - Energy Economics                                               | Institute of Energy Economics at the University of Cologne | Germany                                                    |
| Gierse, Robin           | PhD Student                                                              | Helmholtz Centre for Infection Research (HZI)              | Germany                                                    |
| Giffard, Pierrick       | Oceanographer                                                            | LEGOS                                                      | France                                                     |
| Gignac, Paul            | Associate Professor, Biomedical Sciences                                 | Oklahoma State University Center for Health Sciences       | United States of America (the)                             |
| Gil, Orlando            |                                                                          | Hunter College                                             | United States of America (the)                             |
| Gil, Artur              | Researcher in Remote Sensing and Spatial Planning                        | University of the Azores                                   | Portugal                                                   |
| Gil-Jiménez, Esperanza  | PhD student                                                              |                                                            | Spain                                                      |
| GIL-SANTANA, HÉLCIO     | RESEARCHER/ENTOMOLOGY                                                    | OSWALDO CRUZ INSTITUTE                                     | Brazil                                                     |
| Gilberg, Emma           | Physician / General Practitioner                                         |                                                            | Australia                                                  |
| Gilbert, M. Thomas P.   | Professor of Palaeogenomics                                              | University of Copenhagen                                   | Denmark                                                    |
| Gilbert, Michael        | Honorary Research Associate, Botanist                                    | Royal Botanic Gardens, Kew                                 | United Kingdom of Great Britain and Northern Ireland (the) |
| GILBERT, Daniel         | Professor Microbial Ecology, Peatlands                                   | Université de Bourgogne-Franche-Comté                      | France                                                     |
| Gilchrist, Elizabeth    | Lecturer, Analytical Chemistry                                           | University College Cork                                    | Ireland                                                    |
| Gilder, Thandiwe        | Psychology                                                               | Bangor University                                          | United Kingdom of Great Britain and Northern Ireland (the) |
| Gilfillan, Daniel       | Senior Environmental Specialist / public health and environmental change | International Centre for Environmental Management          | Viet Nam                                                   |
| Gilgert, Wendell        | Stewardship Ecologist                                                    | Point Blue Conservation Science                            | United States of America (the)                             |
| Gill, Brian             | Curator of Land Vertebrates (retired)                                    | Auckland Museum                                            | New Zealand                                                |
| Gill, Jennifer          | Professor of Applied Ecology                                             | University of East Anglia                                  | United Kingdom of Great Britain and Northern Ireland (the) |
| Gill-Pazaris, Lori      | Retired Biologist and Biochemist                                         | Northwestern University                                    | United States of America (the)                             |

|                                   |                                                 |                                                                                              |                                                            |
|-----------------------------------|-------------------------------------------------|----------------------------------------------------------------------------------------------|------------------------------------------------------------|
| Gillanders, Bronwyn               | Professor, Marine Ecology                       | University of Adelaide                                                                       | Australia                                                  |
| Gillard, Morgane                  | Plant Ecology                                   |                                                                                              | France                                                     |
| Gillard, Tristan                  | PhD student in informatics                      | LORIA                                                                                        | France                                                     |
| Gillerot, Loïc                    | Doctoral student                                | Ghent University                                                                             | Belgium                                                    |
| GILLESPIE, THOMAS                 | Professor                                       | Emory University                                                                             | United States of America (the)                             |
| Gilless, J.                       | Professor                                       | University of California, Berkeley                                                           | United States of America (the)                             |
| Gillet, François                  | Professor of Ecology                            | University Bourgogne Franche-Comté                                                           | France                                                     |
| Gilli, Gabriella                  | Researcher in Planetary Atmosphere              | Institute of Astrophysics and Space Science (IA)                                             | Portugal                                                   |
| Gillikin, David                   | Professor of Geology                            | Union College                                                                                | United States of America (the)                             |
| Gillingham, Mark                  | Postdoctoral scientist                          | University of Ulm                                                                            | Germany                                                    |
| Gillis, Lucy Gwen                 | Post doctorate, Marine Ecologist                | Leibniz Center for Tropical Marine Research                                                  | Germany                                                    |
| Gillman, Len                      | Professor of biogeography                       | Auckland University of Technology                                                            | New Zealand                                                |
| Gillon, Michael                   | Astrophysicist - FNRS Senior Research Scientist | University of Liège                                                                          | Belgium                                                    |
| Gillow, Zoe                       | Clinical Science                                | Griffith University                                                                          | Australia                                                  |
| Gills, Barry                      | Professor of Development Studies                | University of Helsinki                                                                       | Finland                                                    |
| Gilmore, Shannon                  | Ecologist (MSc)                                 | Lincoln University                                                                           | New Zealand                                                |
| gilmour, james                    | Coral Reef Ecologist                            |                                                                                              | Australia                                                  |
| Gilmour, Sarah                    | Retired plant scientist                         | Michigan State University                                                                    | United States of America (the)                             |
| Gilra, Aditya                     | Postdoctoral Fellow                             | Institute of Science and Technology Austria                                                  | Austria                                                    |
| Giménez, Andrés                   | Professor of Ecology                            | Universidad Miguel Hernández                                                                 | Spain                                                      |
| gimona, alessandro                | senior scientist environmental sciences         | JHI                                                                                          | United Kingdom of Great Britain and Northern Ireland (the) |
| Gindrier, Nicolas                 | PhD student in applied mathematics              | Université Grenoble-Alpes                                                                    | France                                                     |
| Gintamo, Tesfaye Tessema          | PhD student, Environmental and Water Sciences   | University of the Western Cape                                                               | South Africa                                               |
| Gionchetta, Giulia                | Universitat de Girona                           | Universitat de Girona                                                                        | Spain                                                      |
| Giora, Julia                      | Researcher, Data Science Analyst                | Plazi                                                                                        | Brazil                                                     |
| Giordani, Antonio                 | MSc, PhD student from Fall 2019                 | ACINN (Institute for Atmospheric and Cryospheric Sciences), University of Innsbruck, Austria | Italy                                                      |
| Giordano, M.Carmen                | PhD student in Material Science                 | EPFL                                                                                         | Switzerland                                                |
| Giordano, Stefano                 | Research scientist                              | CNRS                                                                                         | France                                                     |
| Gioria, Margherita                | Researcher                                      | Czech Academy of Sciences                                                                    | Italy                                                      |
| GIOVANETTO, LAINE                 | associate professor                             | New Jersey City University                                                                   | United States of America (the)                             |
| Givos, Ioannis                    | Fisheries Director                              | iSea, Environmental Organisation for the Preservation of the Aquatic Ecosystems              | Greece                                                     |
| Gippert, Magdalena                | PhD Student                                     | Max Planck Institute for Human Cognitive and Brain Sciences                                  | Germany                                                    |
| Gipperth, Lena                    | Professor in Environmental law /Director        | Centre for Sea and Society                                                                   | Sweden                                                     |
| Giraldo, Alan                     | Marine Biologist and Dr. Oceanography           | Universidad del Valle                                                                        | Colombia                                                   |
| Giraldo-Perez, Paulina            | PhD student Biological Sciences                 | The University of Auckland                                                                   | New Zealand                                                |
| Girão Rodrigues de Mello, Natália | PhD researcher                                  | KU Leuven                                                                                    | Belgium                                                    |
| Girard, Franck                    | Medicine-Neurosciences-Histologie               | University of Fribourg                                                                       | Switzerland                                                |

|                        |                                                                        |                                                                                            |                                                            |
|------------------------|------------------------------------------------------------------------|--------------------------------------------------------------------------------------------|------------------------------------------------------------|
| Girardi, Leo           | Researcher in astrophysics                                             | Istituto Nazionale di Astrofisica                                                          | Italy                                                      |
| Giraud, Gael           | Economist                                                              | CNRS                                                                                       | France                                                     |
| GIRAUD, Michel         | Fruit Pathology Lab, Plant Health Unity                                | Centre Technique Interprofessionnel des Fruits et Légumes                                  | France                                                     |
| Giraud, Alejandro      | Researcher of CONICET (Argentina) and Universidad Nacional del Litoral | Instituto Nacional de Limnología (INALI, CONICET-UNL)                                      | Argentina                                                  |
| Giraudoux, Patrick     | Professor of Ecology                                                   | University of Franche-Comté                                                                | France                                                     |
| Girling, Robbie        | Associate Professor in Agroecology and Sustainable Agriculture         | University of Reading                                                                      | United Kingdom of Great Britain and Northern Ireland (the) |
| Girod, Luc             | Research Engineer, Remote Sensing                                      | University of Oslo                                                                         | Norway                                                     |
| Girondot, Marc         | Professor of Ecology                                                   | Laboratory Ecology, Systematics, Evolution - University Paris-Saclay, University Paris-Sud | France                                                     |
| Gisbert, Juan          | Associate professor Hydrogeology                                       | University of Almeria                                                                      | Spain                                                      |
| Gismann, Jakob         | PhD candidate                                                          | University Groningen                                                                       | Germany                                                    |
| Gitonga, Zachary       | Ph.D. Economics                                                        | Consultant                                                                                 | Kenya                                                      |
| Giudicelli, Francois   | Researcher, Genomics                                                   | INSERM                                                                                     | France                                                     |
| Giuliano, Davide       | Environmental biologist                                                | Monviso Natural Park                                                                       | Italy                                                      |
| Giunta, Carmen         | Professor of Chemistry emeritus                                        | Le Moyne College                                                                           | United States of America (the)                             |
| GIURFA, Martin         | Full Professor of Neurosciences                                        | CNRS - University of Toulouse                                                              | France                                                     |
| Giusti, Matteo         | Research Fellow                                                        | Högskolan i Gävle                                                                          | Sweden                                                     |
| Given, David           | Doctor of Pharmacy                                                     | University of Texas at Austin                                                              | United States of America (the)                             |
| Givens, Justina        | Researcher                                                             | CNRS (The National Center for Scientific Research)                                         | France                                                     |
| Gkikopoulou, Kalliopi  | Biologists                                                             | University of St Andrews                                                                   | United Kingdom of Great Britain and Northern Ireland (the) |
| Glalah, Mark           | Lecturer / Natural Resources Scientist / Forester                      | Tamale Technical University, Tamale                                                        | Ghana                                                      |
| Glantz, Paul           | Associate professor in atmospheric science                             | Department of Environmental Science, Stockholm University                                  | Sweden                                                     |
| Glasgow, Jamie         | Director of Science                                                    | Wild Fish Conservancy                                                                      | United States of America (the)                             |
| Glassom, David         | Academic, marine biology                                               | University of KwaZulu-Natal                                                                | South Africa                                               |
| Glémin, Sylvain        | Researcher / Evolutionary biology                                      | CNRS                                                                                       | France                                                     |
| Glen, Al               | Wildlife Ecologist                                                     | Manaaki Whenua - Landcare Research                                                         | New Zealand                                                |
| Glockmann, Manon       | Geography                                                              | University of Potsdam                                                                      | Germany                                                    |
| Gloerfelt-Tarp, Thomas | Fisheries Scientist                                                    |                                                                                            | Denmark                                                    |
| Gloor, Emanuel         | Professor                                                              | University of Leeds                                                                        | United Kingdom of Great Britain and Northern Ireland (the) |
| Glynn, Amanda          | Ph.D. in Geology                                                       | Sacramento State                                                                           | United States of America (the)                             |
| Gobbi, Mauro           | Curator / alpine insect ecology                                        | MUSE-Science Museum                                                                        | Italy                                                      |
| Gobbin, Tiziana        | PhD in Evolution                                                       | University of Bern                                                                         | Switzerland                                                |
| Godbold, Jasmin        | Assistant Professor                                                    | University of Southampton                                                                  | United Kingdom of Great Britain and Northern Ireland (the) |
| Goddard, Linda         | Peace and Justice Institute professor                                  | Valencia College                                                                           | United States of America (the)                             |
| Godefroid, Sandrine    | Research Scientist - Plant Conservation                                | Meise Botanic Garden                                                                       | Belgium                                                    |



|                                 |                                                                      |                                                            |                                                            |
|---------------------------------|----------------------------------------------------------------------|------------------------------------------------------------|------------------------------------------------------------|
| Godfrey, Jonathan               | Physical Chemistry                                                   |                                                            | New Zealand                                                |
| Godfrey, Stephanie              | Lecturer in Zoology                                                  | University of Otago                                        | New Zealand                                                |
| Godin, Philippe                 | Veterinarian/PhD Candidate in Physiology of Reproduction             | Université de Montréal                                     | Canada                                                     |
| Godin-Beekmann, Sophie          | Director of Research in Atmospheric Science                          | CNRS                                                       | France                                                     |
| Godinho, Raquel                 | Researcher                                                           | CIBIO/InBIO, University of Porto                           | Portugal                                                   |
| Godinho Lobo Girão Ribeiro, Rui | Full Professor                                                       | University of Coimbra                                      | Portugal                                                   |
| Godinot, Olivier                | Assistant professor in agronomy                                      | Agrocampus Ouest                                           | France                                                     |
| Godley, Brendan                 | Professor of Conservation Science                                    | University of Exeter                                       | United Kingdom of Great Britain and Northern Ireland (the) |
| Godoy, José A.                  | Scientific Researcher                                                | CSIC                                                       | Spain                                                      |
| Godoy, Tomas                    | Full professor, Mathematician                                        | Universidad Nacional de Cordoba                            | Argentina                                                  |
| Godoy León, María Fernanda      | PhD researcher                                                       | Ghent University                                           | Chile                                                      |
| Godoy-Faúndez, Alex             | Associate Professor                                                  | Universidad del Desarrollo                                 | Chile                                                      |
| Godoy-Veiga, Milena             | PhD. student in Dendrochronology                                     | Institute of Biosciences at the University of São Paulo    | Brazil                                                     |
| Goerlitz, Holger R.             | Research Group Leader                                                | Max Planck Institute for Ornithology Seewiesen             | Germany                                                    |
| Goetghebuer, Tessa              | Pediatrician                                                         | Free University of Brussels                                | Belgium                                                    |
| Gogarten, Johann Peter          | Distinguished Professor of Molecular and Cell Biology                | University of Connecticut                                  | United States of America (the)                             |
| Goh, Sean                       | Civil Engineering                                                    |                                                            | Singapore                                                  |
| Gojska, Agata                   | PhD in Sociology                                                     | Institute of Applied Social Sciences, University of Warsaw | Poland                                                     |
| Golab, Maria J.                 | assistant professor                                                  | Institute of Nature Conservation PAS                       | Poland                                                     |
| Golay, Philippe                 | Herpetologist                                                        | Elapsoidea                                                 | Switzerland                                                |
| Goldammer, Johann Georg         | Director                                                             | Global Fire Monitoring Center (GFMC)                       | Germany                                                    |
| Goldberg, Deborah               | Professor Emerita                                                    | University of Michigan                                     | United States of America (the)                             |
| Golden, Christopher             | Assistant Professor                                                  | Harvard TH Chan School of Public Health                    | United States of America (the)                             |
| Golden, Heidi                   | Ecologist                                                            | Woods Hole Research Center                                 | United States of America (the)                             |
| Golden Kroner, Rachel           | Social Scientist                                                     | Conservation International                                 | United States of America (the)                             |
| Golding, David                  | Associate, Faculty of Science, Agriculture and Engineering (Retired) | Newcastle University, UK                                   | United Kingdom of Great Britain and Northern Ireland (the) |
| Goldingay, Ross                 | Wildlife Ecologist                                                   | Southern Cross University                                  | Australia                                                  |
| Goldstein, Isaac                | Graduate Student, Behavioral Psychology                              | Copenhagen Business School                                 | Denmark                                                    |
| Goldstein, Jesse                | Environmental Data Manager                                           | University of California                                   | United States of America (the)                             |
| Golledge, Nicholas              | Associate Professor, Glaciology                                      | Victoria University of Wellington                          | New Zealand                                                |
| Gollifer, David                 | Agronomist                                                           | Retired                                                    | United Kingdom of Great Britain and Northern Ireland (the) |
| Gollner, Sabine                 | Scientist, Marine Ecology                                            | NIOZ                                                       | Netherlands (the)                                          |
| Golob, Estefania                | Aquatic Ecologist                                                    | WWT                                                        | United Kingdom of Great Britain and Northern Ireland (the) |
| Golubic, MD, PhD, Mladen        | Medical Director/ Center for Integrative Health and Wellness         | University of Cincinnati                                   | United States of America (the)                             |
| Golubov, Jordan                 | Proessor of Ecology                                                  | Universidad Autonoma Metropolitana Xochimilco              | Mexico                                                     |

|                                                |                                                                     |                                                                              |                                                            |
|------------------------------------------------|---------------------------------------------------------------------|------------------------------------------------------------------------------|------------------------------------------------------------|
| Gomes, Daniel                                  | Master in Information Science                                       | Federal University of Pará                                                   | Brazil                                                     |
| Gomes, Vanessa                                 | Research                                                            | Instituto Nacional do Semiarido                                              | Brazil                                                     |
| Gomes, Maria Cecilia                           |                                                                     | Mamiraua Institute for Sustainable Development                               | Brazil                                                     |
| Gomes, Jean Michel                             | Astrophysicist                                                      | Instituto de Astrofísica e Ciências do Espaço                                | Portugal                                                   |
| Gomes, Luiz                                    | Professor                                                           | Universidade Estadual de Maringá                                             | Brazil                                                     |
| Gomes, Sara                                    | Biologist                                                           | Faculdade de Ciências da Universidade de Lisboa                              | Portugal                                                   |
| Gomes da Silva, João                           | Researcher/Astrophysics                                             | Institute of Astronomy and Space Sciences (IA)                               | Portugal                                                   |
| Gomes dos Santos Wendriner<br>Loebmann, Daniel | Scientific analyst                                                  | Embrapa                                                                      | Brazil                                                     |
| Gomes Rocha, Rita                              | Post-doctoral researcher                                            | CIBIO-InBIO                                                                  | Portugal                                                   |
| Gomes Rosa, Ana Margarida                      | Molecular Biology                                                   | NZYTech                                                                      | Portugal                                                   |
| Gomez, Erika                                   | PhD student                                                         | Instituto de Investigaciones Agropecuarias y Forestales, UMSNH               | Mexico                                                     |
| Gomez, Africa                                  | Senior Lecturer                                                     | University of Hull                                                           | United Kingdom of Great Britain and Northern Ireland (the) |
| Gómez, Rosa                                    | Tenured Professor                                                   | Murcia Universitu                                                            | Spain                                                      |
| Gómez, Nuria                                   | Assistant Professor un Economics                                    | Universidad de Castilla-L                                                    | Spain                                                      |
| Gómez, Ania                                    | Molecular Biology                                                   | Facultad de Ciencias, Universidad de la República                            | Uruguay                                                    |
| Gómez, Tomás                                   | Director of FIIBAP                                                  | Primary Care Research Foundation of Madrid                                   | Spain                                                      |
| Gomez Crespo, Bibiana                          | Senior researcher                                                   | Norwegian institute for water research                                       | Norway                                                     |
| Gómez Galindo, Alma Adrianna                   | Researcher in Science Education                                     | CINVESTAV Monterrey                                                          | Mexico                                                     |
| Gomez Gras, Daniel                             | PhD candiate                                                        | Institut de Ciències del Mar (ICM-CSIC)                                      | Spain                                                      |
| Gómez-Creutberg, Carla                         | Geographer                                                          | University of Canterbury                                                     | New Zealand                                                |
| Gomez-Heras, Miguel                            | Lecturer in Geology                                                 | Universidad Autonoma de Madrid                                               | Spain                                                      |
| Gómez-Paredes, Jorge                           | Ph.D. Energy Science                                                | Duke Universtiy & Yachay Tech University                                     | Ecuador                                                    |
| Gomez-Ramos, Pilar                             | Retired University professor                                        | Univ Autonoma of Madrid                                                      | Spain                                                      |
| Gómez-Serrano, Miguel Angel                    | Biologist                                                           | VAERSA-Generalitat Valenciana                                                | Spain                                                      |
| Gomis, Damià                                   | Professor of Physics of the Earth                                   | University of the Balearic Islands                                           | Spain                                                      |
| Gomis-Rüth, F. Xavier                          | Professor                                                           | Molecular Biology Institute of Barcelona (CSIC)                              | Spain                                                      |
| Goncalves, Priscila                            | Postdoctoral fellow                                                 | University of Exeter                                                         | United Kingdom of Great Britain and Northern Ireland (the) |
| Goncalves, Leandra                             | Researcher                                                          | University of Sao Paulo                                                      | Brazil                                                     |
| Gonçalves, Duarte Vasconcelos                  | Post-Doc, Biological sciences                                       | CIIMAR, University of Porto                                                  | Portugal                                                   |
| Gonçalves, Ana                                 | Post-doctoral Researcher in Plant Physiology                        | University of São Paulo                                                      | Brazil                                                     |
| Gonçalves, Helena                              |                                                                     | MHNC-UP                                                                      | Portugal                                                   |
| Gonçalves, David                               | Assistant Professor, Conservation Biology                           | CIBIO/InBIO Associated Laboratory & Faculty of Sciences. University of Porto | Portugal                                                   |
| Gonçalves, Emanuel                             | Associate Professor                                                 | ISPA-Instituto Universitário                                                 | Portugal                                                   |
| Gonçalves, Pablo                               | Associate Professor                                                 | Universidade Federal do Rio de Janeiro                                       | Brazil                                                     |
| Gonçalves de Andrade, Rute Maria               | Scientific Research / Biology, Public Healty, Environmental Science | Fundação Museu do Homem Americano                                            | Brazil                                                     |
| Gonçalves-Souza, Thiago                        | Faculty                                                             | Universidade Federal Rural de Pernambuco                                     | Brazil                                                     |

|                                  |                                                          |                                                                                                      |                                                            |
|----------------------------------|----------------------------------------------------------|------------------------------------------------------------------------------------------------------|------------------------------------------------------------|
| Gondrand, Corentin               | Postdoctoral researcher in chemical biology              | Max-Planck Institute for medical research                                                            | Germany                                                    |
| Gonen, Lilah                     | Graduate Research Assistant                              | Oregon State University                                                                              | United States of America (the)                             |
| Gonev, Andrej                    | Ecologist                                                | Ss. Cyril and Methodius University, Skopje                                                           | Macedonia, Republic of (the former Yugoslavia)             |
| Gonzague, agez                   | assistant professor                                      | Université Toulouse 3                                                                                | France                                                     |
| Gonzalez, Leticia                | Biochemist, PhD in Biochemistry                          | Pontificia Universidad Catolica de Chile                                                             | Chile                                                      |
| Gonzalez, Jose L.                | Agriculture                                              | CSIC                                                                                                 | Spain                                                      |
| Gonzalez, Patrick                | Associate Adjunct Professor, climate change              | University of California, Berkeley                                                                   | United States of America (the)                             |
| Gonzalez, Mauro                  | Forest Ecology                                           | Universidad Austral de Chile                                                                         | Chile                                                      |
| Gonzalez, Melissa                | Marine Biology                                           | Coral Reef Management Fellow                                                                         | Puerto Rico                                                |
| Gonzalez, Adrian                 | Associate Lecturer in Human Geography and Environment    | University of York                                                                                   | United Kingdom of Great Britain and Northern Ireland (the) |
| Gonzalez, Elizabeth              | Astronomy                                                | IATE                                                                                                 | Argentina                                                  |
| Gonzalez, Georges                | Ethologist                                               | CEFS-INRA                                                                                            | France                                                     |
| GONZALEZ, Georges                | researcher in non human ethology                         | National institute of research on agronomy and environment (INRAe)                                   | France                                                     |
| González, Aridane G.             | Postdoctoral Researcher                                  | Instituto de Oceanografía y Cambio Global (IOCAG), Universidad de Las Palmas de Gran Canaria (ULPGC) | Spain                                                      |
| González, Leydianis              | Biologist                                                | Instituto de Ciencias Médicas                                                                        | Panama                                                     |
| González, Luís                   | Associate Profesor Plant Physiology                      | University of Vigo                                                                                   | Spain                                                      |
| González - Sanchis, María        | Assistant professor                                      | Universitat Politecnica de Valencia                                                                  | Spain                                                      |
| González Carballo, Marta         | Marine Biologist                                         | Observatorio Ambiental Granadilla                                                                    | Spain                                                      |
| Gonzalez Forero, Manuela         | Ecological Research                                      | Estación Biológica de Doñana (Consejo Superior de Investigaciones Científicas)                       | Spain                                                      |
| Gonzalez Grandio, Eduardo        | Plant Molecular Biology postdoctoral researcher          | UC Berkeley                                                                                          | United States of America (the)                             |
| Gonzalez pelayo, Oscar           | Researcher soil science                                  | Universidade de Aveiro                                                                               | Portugal                                                   |
| Gonzalez Plaza, Juan Jose        | Postdoctoral Researcher                                  | Faculty of Forestry and Wood Sciences, Czech University of Life Sciences                             | Czech Republic (the)                                       |
| González Reyes, Luis             | doctor in Chemistry                                      |                                                                                                      | Spain                                                      |
| González Rodarte, Jantai Aquiles | Geophysics and Technology                                | National Autonomous University of Mexico                                                             | Mexico                                                     |
| Gonzalez Santana, Andres         | MSCA postdoctoral fellow - Glycochemistry                | CSIC                                                                                                 | Spain                                                      |
| González Sevilleja, Cristina     | Nature Conservation                                      | De Vlinderstichting, Dutch Butterfly Conservation                                                    | Netherlands (the)                                          |
| Gonzalez Svatetz, Carlos A.      | Senior research in epidemiology and nutrition            | Catalan Institute of Oncology                                                                        | Spain                                                      |
| González-Acuña, Daniel           | Vet                                                      | Universidad de Concepción                                                                            | Chile                                                      |
| González-Barrientos, Javier      | Doctor (c) en Ciencias Silvoagropecuarias y Veterinarias | Universidad de Chile                                                                                 | Chile                                                      |
| González-Benítez, Natalia        | Microbiology                                             | University Rey Juan Carlos                                                                           | Spain                                                      |
| González-Bernardo, Enrique       | PhD Student                                              | CSIC                                                                                                 | Spain                                                      |
| Gonzalez-Caro, Sebastian         | PhD Student                                              | Universidad Nacional de Colombia                                                                     | Colombia                                                   |
| Gonzalez-Chang, Mauricio         | Assistant Professor in Agroecology                       | Universidad de Aysén                                                                                 | Chile                                                      |
| Gonzalez-Eguino, Mikel           | Research Professor                                       | BC3 Baque Centre for Climate Change                                                                  | Spain                                                      |
| González-Gaudiano, Edgar         | Researcher in climate change education                   | Universidad Veracruzana                                                                              | Mexico                                                     |

|                               |                                                                        |                                                      |                                                            |
|-------------------------------|------------------------------------------------------------------------|------------------------------------------------------|------------------------------------------------------------|
| González-Ittig, Raúl          | Researcher and Professor                                               | IDEA (Conicet-UNC, Argentina)                        | Argentina                                                  |
| Gonzalez-Lagos, Cesar         | Associated researcher                                                  | Universidad Bernardo O' Higgins & CAPES              | Chile                                                      |
| González-Maya, José F.        | Scientific Director                                                    | ProCAT Colombia                                      | Colombia                                                   |
| González-Morales, Susana      | Researcher                                                             | CONAHCYT- Universidad Autonoma Agraria Antonio Narro | Mexico                                                     |
| González-Pérez, Jose A.       | Senior Scientist, Biogeochemist                                        | Spanish Council for Scientific Research (IRNAS-CSIC) | Spain                                                      |
| González-Reyes, Acaimo        | Professor of Research                                                  | Spanish National Research Council                    | Spain                                                      |
| González-Rodríguez, Antonio   | Researcher                                                             | Universidad Nacional Autónoma de México              | Mexico                                                     |
| González-Trujillo, Juan David | Early Career Researcher. Ecology of Climate Change                     | Universidade de Evora                                | Portugal                                                   |
| González-Varo, Juan Pedro     | Ecologist                                                              | Universidad de Oviedo                                | Spain                                                      |
| González-Viñas, Wenceslao     | Associate Professor                                                    | University of Navarra                                | Spain                                                      |
| Gonzalez-Pelayo, Oscar        | researcher in environmental sciences                                   | CESAM University of Aveiro, Portugal                 | Portugal                                                   |
| Good, Kelly                   | Civil & Environmental Engineering                                      |                                                      | United States of America (the)                             |
| Good, Spencer                 | rangeland research technician                                          |                                                      | United States of America (the)                             |
| Goodchild, Anthony            | Veterinary Epidemiologist                                              | Animal and Plant Health Agency                       | United Kingdom of Great Britain and Northern Ireland (the) |
| Goodenough, Jessica           | Geography PhD student                                                  | University of Reading                                | United Kingdom of Great Britain and Northern Ireland (the) |
| Goodman, Peter                | Wildlife and Conservation Ecologist                                    | Retired                                              | South Africa                                               |
| Goodman, Roger                | Bachelor of Science in Climate Change Management                       | Murdoch University                                   | Australia                                                  |
| Goodman, Steven               | MacArthur Field Biologist                                              | Field Museum of Natural History                      | United States of America (the)                             |
| Goodwin, Cecily               | Research Associate, Disease Ecology                                    | University of Exeter                                 | United Kingdom of Great Britain and Northern Ireland (the) |
| Gopakumar, Anjali             | Student currently doing her Master in Marine Biology                   | Ghent University                                     | Belgium                                                    |
| Gopalasingam, Piraveen        | Scientific training officer / Life sciences                            | EMBL-EBI                                             | United Kingdom of Great Britain and Northern Ireland (the) |
| Gopaul, Sunil                 | Environmental and Social Safeguards Coordinator, Environmental Science | Central Housing and Planning Authority               | Guyana                                                     |
| Gorchov, David                | professor                                                              | Miami University                                     | United States of America (the)                             |
| Gorczał, Michał               |                                                                        | University of Warsaw                                 | Poland                                                     |
| Gordo, Oscar                  | Researcher / Ecology                                                   |                                                      | Spain                                                      |
| Gordon, Timothy               | PhD researcher in marine biology                                       | University of Exeter                                 | United Kingdom of Great Britain and Northern Ireland (the) |
| Gordon, Ascelin               | Senior Research Fellow                                                 | RMIT University                                      | Australia                                                  |
| Gordon, Iain                  | Deputy Vice Chancellor                                                 | James Cook University                                | Australia                                                  |
| Gordon, Deborah M             | Professor                                                              | Stanford University                                  | United States of America (the)                             |
| Gordon, Melita                | Professor                                                              | University of Liverpool                              | United Kingdom of Great Britain and Northern Ireland (the) |
| Gorelik, Seth                 | Researcher Assistant in Aboveground Carbon Dynamics                    | Woods Hole Research Center                           | United States of America (the)                             |
| GORHAM, WILLIAM               | Principle Biologist                                                    | Retired                                              | United States of America (the)                             |
| Gori, Andrea                  | Associate Professor                                                    | Università del Salento                               | Italy                                                      |

|                            |                                                           |                                                                              |                                                            |
|----------------------------|-----------------------------------------------------------|------------------------------------------------------------------------------|------------------------------------------------------------|
| Gorissen, Dr Sarsha        | Wildlife Ecologist                                        |                                                                              | Australia                                                  |
| Görner, Marius             | PhD student, neuroscience                                 | Hertie Institute for Clinical Brain Science                                  | Germany                                                    |
| Gortazar, Christian        | Professor/Animal Health                                   | Universidad de Castilla-La Mancha                                            | Spain                                                      |
| Gorzalka, Philip           | PhD student                                               | German Aerospace Center (DLR)                                                | Germany                                                    |
| Gossa, Mesfin Wondafrash   | Postdoctoral Research Fellow, Entomology                  | FABI, University of Pretoria                                                 | South Africa                                               |
| Gossart, Alexandra         | PostDoc                                                   | Antractic Research Centre, Victoria University of Wellington                 | New Zealand                                                |
| Gosselin, Romain-Daniel    | Biology, pathology                                        | Lausanne University Hospital (CHUV)                                          | Switzerland                                                |
| Gossenberger, Florian      | Theoretical Chemistry                                     |                                                                              | Germany                                                    |
| Gossens, Richard           | Doctoral student                                          | University of Helsinki                                                       | Finland                                                    |
| Gossiaux, Alice            | PhD Student                                               | Université de Lorraine                                                       | France                                                     |
| Gosztonyi, Susanne         | Lecturer, Researcher in energy and building constructions | Lucerne University of Applied Sciences and Arts                              | Switzerland                                                |
| Gotanda, Kiyoko            | Postdoctoral Fellow/Evolution and Behaviour               | University of Cambridge                                                      | United Kingdom of Great Britain and Northern Ireland (the) |
| Gotfredsen, Anne Birgitte  | Part time lecturer, Ph.d. Biology                         | Globe Institute, University of Copenhagen                                    | Denmark                                                    |
| Götmark, Frank             | Professor, Ecology                                        | University of Gothenburg                                                     | Sweden                                                     |
| Götmark, Elin              | Associate Professor of Mathematics                        | Mathematical Sciences, Chalmers University of Technology/Göteborg University | Sweden                                                     |
| Gottlieb, Nora             | Research associate, Dept of Health Care Management        | Technical University Berlin                                                  | Germany                                                    |
| Gottlieb, Avi              |                                                           | Tel Aviv University                                                          | Israel                                                     |
| Gottsberger, Richard       | ecologist /molecular biologist                            |                                                                              | Austria                                                    |
| Gottschall, Felix          | Doctoral researcher in soil ecology                       | German Centre for Integrative Biodiversity Research (iDiv)                   | Germany                                                    |
| Götz, Niklas               | PhD Candidate, Physics                                    | FIAS                                                                         | Germany                                                    |
| Goudet, Jerome             | Professor, population genetics                            | University of Lausanne                                                       | Switzerland                                                |
| Goudreault, Felix          | PhD student in Condensed Matter Physics                   | Universite de Montreal                                                       | Canada                                                     |
| Goudreault, Felix Antoine  | PhD student Condensed Matter Physics                      | Université de Montréal                                                       | Canada                                                     |
| GOUIN-BOURDEILH, Charles   | Medical Student                                           | University of Bordeaux                                                       | France                                                     |
| Gould, Mark                | Chemistry                                                 |                                                                              | Australia                                                  |
| Gould, Sven                | Associate Prof for Evolutionary Cell Biology              | HHU Düsseldorf                                                               | Germany                                                    |
| Gould, Liz                 | Principal Scientist                                       | Healthy Land and Water                                                       | Australia                                                  |
| Goulson, Dave              | Professor of Biology                                      | University of Sussex                                                         | United Kingdom of Great Britain and Northern Ireland (the) |
| Gounand, Isabelle          | Postdoc in Ecology                                        | University of Zürich / Eawag                                                 | Switzerland                                                |
| GOURDAIN, Philippe         | Head of biodiversity partnerships unit                    | National Museum of Natural History of Paris                                  | France                                                     |
| Gourdeau, Lionel           | Oceanographer                                             | IRD                                                                          | France                                                     |
| Gourguet, Sophie           | Researcher                                                | Ifremer                                                                      | France                                                     |
| gourlan, alexandra         | Lecturer/scientist                                        | UGA                                                                          | France                                                     |
| Gourlay, Philippe          | Wildlife veterinarian and epidemiologist                  | Oniris - Wildlife Health Centre                                              | France                                                     |
| Gourlez de la Motte, Louis | Post Doc Researcher                                       | University of Liege                                                          | Belgium                                                    |

|                              |                                                             |                                                                                  |                                                            |
|------------------------------|-------------------------------------------------------------|----------------------------------------------------------------------------------|------------------------------------------------------------|
| Gouwakinnou, Gérard N.       | Assistant Professor / Conservation Biology                  | Laboratory of Ecology, Botany and Plant Biology (LEB), Université de Parakou     | Benin                                                      |
| Gouws, Jeanne                | Freshwater Ecologist                                        | CapeNature (conservation agency)                                                 | South Africa                                               |
| Gouy, Alexandre              | Population genetics                                         | University of Bern                                                               | Switzerland                                                |
| Gouyon, Pierre-Henri         | Professor of Systematics & Evolution                        | Museum National d'Histoire Naturelle de Paris                                    | France                                                     |
| Govers, Laura                | Assistant Professor in Marine Conservation Ecology          | University of Groningen   NIOZ                                                   | Netherlands (the)                                          |
| Goward, Trevor               | lichenologist                                               | University of British Columbia                                                   | Canada                                                     |
| Gowdy, John Malcolm          | Professor of Economics, Emeritus                            | Rensselaer Polytechnic Institute                                                 | United States of America (the)                             |
| Gower, Graham                | Postdoc in genetics and evolution                           | University of Copenhagen                                                         | Denmark                                                    |
| Gowrappan, Muthusankar       | Head of GIS Projects                                        | French Institute of Pondicherry                                                  | India                                                      |
| Goya Grocin, Andrea          | PhD student in Chemical Biology                             | Imperial College London                                                          | United Kingdom of Great Britain and Northern Ireland (the) |
| Goyal, Akshit                |                                                             | Massachusetts Institute of Technology                                            | United States of America (the)                             |
| Goyet, Sophie                | Epidemiologist                                              | Independent researcher                                                           | France                                                     |
| Goymann, Wolfgang            | Behavioural Ecology                                         | Max-Planck-Institute for Ornithology                                             | Germany                                                    |
| Gözlet, Mehmet Sedat         | PhD Candidate / Climate Science                             | GEOMAR Helmholtz Centre for Ocean Research Kiel                                  | Germany                                                    |
| Graber, Marianne             | Professor in Biochemistry                                   | CNRS UMR LIENSs university of La Rochelle                                        | France                                                     |
| Gräbin, Diogo                | Biologist                                                   | Universidade Estadual de Santa Cruz                                              | Brazil                                                     |
| Grabowska, Katarzyna         | PhD in Physics                                              | University of Warsaw                                                             | Poland                                                     |
| Grabowski, Zbigniew          | Postdoctoral Researcher and Instructor, Geography           | Cary Institute of Ecosystem Studies / The New School / Portland State University | United States of America (the)                             |
| Graça, Manuel                | Ecology                                                     | MARE & University of Coimbra                                                     | Portugal                                                   |
| Grace, Jaime                 | Assistant Professor of Biology                              | Bradley University                                                               | United States of America (the)                             |
| Graef, Federico              | Professor, Physical Oceanography                            | CICESE                                                                           | Mexico                                                     |
| Graeff, Moritz               | Postdoctoral researcher in Plant Developmental Biology      | University of Lausanne                                                           | Switzerland                                                |
| Graf, Martin                 | Environmental Systems Scientist                             | Helmholtz Center of Environmental Research - UFZ                                 | Germany                                                    |
| Graf, Rupert                 | Researcher / Refrigeration Engineering                      | Technische Universität Berlin                                                    | Germany                                                    |
| Graf von Reventlow, Heinrich | Clinical Psychology                                         | Self employed                                                                    | Germany                                                    |
| Grafius, Darren              | Postdoctoral Research Associate in environmental geography  | University of Sheffield                                                          | United Kingdom of Great Britain and Northern Ireland (the) |
| Grafmüller, Jannis           | Masters student in Chemical Engineering/Process Engineering | KIT                                                                              | Germany                                                    |
| Gräfnings, Max               | Environmental Marine Biology                                |                                                                                  | Finland                                                    |
| Graham, William              | Marine Biologist                                            | ITESM and Bachillerato Anahuac                                                   | Mexico                                                     |
| Graham, Linda                | Professor of Botany                                         | University of Wisconsin-Madison                                                  | United States of America (the)                             |
| Graham, Stephen              | Professor of International Child Health                     | University of Melbourne                                                          | Australia                                                  |
| Graham, John                 | Geologist                                                   | Colorado State University                                                        | United States of America (the)                             |
| Graham, John                 | Natural Resources and Environment                           | Lake Superior State University                                                   | United States of America (the)                             |
| Graham, Christopher          | Biomedical Science                                          | University of Queensland                                                         | Australia                                                  |
| Graham, Samuel               | Organic Chemistry                                           | Retired                                                                          | United States of America (the)                             |

|                            |                                                                   |                                                                                               |                                                            |
|----------------------------|-------------------------------------------------------------------|-----------------------------------------------------------------------------------------------|------------------------------------------------------------|
| Graham, Christopher        | Master of Public Health (MPH) Student                             | University of Manchester                                                                      | United Kingdom of Great Britain and Northern Ireland (the) |
| Graïc, Jean-Marie          | Veterinary Anatomy and Neuroanatomy                               | University of Padova                                                                          | Italy                                                      |
| Grainger, Matthew          | Post-doctorial Fellow wildlife management and conservation        | Norwegian Institute for Nature Research                                                       | Norway                                                     |
| Gram, Wendy                | Ecologist and Program Manager                                     | University Corporation for Atmospheric Research (UCAR)                                        | United States of America (the)                             |
| Gramlich, Philipp          | Co-founder (PhD in chemistry)                                     | Stichting Turfvrij and NaturalScience.Careers                                                 | Netherlands (the)                                          |
| Grams, Thorsten            | Professor                                                         | Technical University of Munich                                                                | Germany                                                    |
| Granado-Lorencio, Carlos   | Profesor                                                          | University of Sevilla                                                                         | Spain                                                      |
| Granados, Ignacio          | Biologist - Aquatic ecology                                       | Sierra de Guadarrama National Park                                                            | Spain                                                      |
| Granados, Alys             | Ecology                                                           |                                                                                               | Canada                                                     |
| Granda, Elena              | Postdoctoral researcher                                           | University of Alcalá                                                                          | Spain                                                      |
| Grandcolas, Philippe       | Senior Scientist, Head of Institute, Evolutionary Biology         | Centre National pour la Recherche Scientifique (CNRS)                                         | France                                                     |
| Grande, Juan Manuel        | Researcher                                                        | INCITAP-CONICET-UNLPam/CECARA-FCEyN-UNLPam                                                    | Argentina                                                  |
| Grande, Terry              | Professor/Biology                                                 | Loyola University Chicago                                                                     | United States of America (the)                             |
| Grande Allende, José Ramón | Professor, Systematic Botany and Ecology                          | Herbario MERF, Facultad de Farmacia y Bioanálisis, Universidad de Los Andes                   | Venezuela (Bolivarian Republic of)                         |
| Grandia, Liza              | cultural anthropologist, Associate Professor                      | UC Davis                                                                                      | United States of America (the)                             |
| Grandin, Aurore            | PhD student in cognitive science                                  | École Normale Supérieure (ENS PSL)                                                            | France                                                     |
| Grange, Marie              | PhD student in ecology                                            | LECA (CNRS)                                                                                   | France                                                     |
| Grange, Thierry            | Research Director, Paleogenomics                                  | Institut Jacques Monod, CNRS, University Paris                                                | France                                                     |
| Graniszevska, Maja         | PhD/Biology                                                       | University of Warsaw                                                                          | Poland                                                     |
| Granitzer, Michael         | Prof. for Computer Science                                        | University of Passau                                                                          | Germany                                                    |
| Granjon, Laurent           | Researcher                                                        | IRD                                                                                           | France                                                     |
| Granot, Jonathan           | Professor of Physics                                              | Open University of Israel                                                                     | Israel                                                     |
| Granot, Itai               | PhD candidate, Ecology                                            | Tel Aviv University                                                                           | Israel                                                     |
| Grant, John                | Research Fellow                                                   | Southern Cross University                                                                     | Australia                                                  |
| Grant, Peter M.            | Professor Emeritus of Biology                                     | Southwestern Oklahoma State University                                                        | United States of America (the)                             |
| Grantz, David              | Plant Physiologist and Extension Air Quality Specialist, Emeritus | University of California at Riverside                                                         | United States of America (the)                             |
| Graser, Laura              | PhD student for Functional Nanomaterials                          | University of Bristol                                                                         | United Kingdom of Great Britain and Northern Ireland (the) |
| Grass, Ingo                | Postdoctoral researcher in Agroecology                            | University of Göttingen                                                                       | Germany                                                    |
| Grasset, Charlotte         | Postdoctoral researcher, aquatic biogeochemistry                  | Uppsala University                                                                            | Sweden                                                     |
| Grasso, Donato A.          | Professor of Zoology                                              | Department of Chemistry, Life Sciences and Environmental Sustainability - University of Parma | Italy                                                      |
| Grate, John                | Chemist, Biotechnologist                                          |                                                                                               | United States of America (the)                             |
| Gratiot, Nicolas           | Sediment geomorphologist                                          | Institut de Recherche pour le Développement                                                   | Viet Nam                                                   |
| Grau, Matthew              | Postdoctoral Researcher - Physics                                 | ETH Zurich                                                                                    | Switzerland                                                |

|                                    |                                                             |                                                                           |                                                            |
|------------------------------------|-------------------------------------------------------------|---------------------------------------------------------------------------|------------------------------------------------------------|
| Graulich, Cora Michal              |                                                             | Staatliches Museum für Naturkunde Stuttgart                               | Germany                                                    |
| Gravend-Tirole, Xavier             | PhD, Independent researcher                                 |                                                                           | Switzerland                                                |
| Graves, William                    | Senior Biological Scientist                                 | Univ. of Florida                                                          | United States of America (the)                             |
| Graves, David                      | Chemical Engineering                                        | University California at Berkeley                                         | United States of America (the)                             |
| Gray, Gary                         | Retired Biochemist                                          | UMO and The Upjohn Company                                                | United States of America (the)                             |
| Gray, Michael                      | Dr                                                          | Newcastle University                                                      | United Kingdom of Great Britain and Northern Ireland (the) |
| Gray, Randall                      | Wildlife Biologist                                          |                                                                           | United States of America (the)                             |
| Gray, Susan                        | Environmental Scientist MSc FRGS MRSB                       | University of London Birkbeck College                                     | United Kingdom of Great Britain and Northern Ireland (the) |
| Graziani, Natalia                  | PhD student (biology)                                       | IMBIV-CONICET                                                             | Argentina                                                  |
| Grazioso, Kathryn                  | Tropical Marine Ecosystem Science                           | University of Miami                                                       | United States of America (the)                             |
| Greaker, Mads                      | Professor in Economics                                      | Oslo Metropolitan University                                              | Norway                                                     |
| Gréau, Yoann                       | Research Associate - Geochemistry                           | Macquarie University                                                      | Australia                                                  |
| Greco, Ilaria                      | PhD student                                                 | University of Florence                                                    | Italy                                                      |
| Green, Leon                        | PhD Candidate in Evolutionary Ecology                       | Department of Biology and Environmental Science, University of Gothenburg | Sweden                                                     |
| Green, Nicola                      | PhD student                                                 | Bournemouth University                                                    | United Kingdom of Great Britain and Northern Ireland (the) |
| Green, Andrew John                 | Professor of Research                                       | Consejo Superior de Investigaciones Cientificas                           | Spain                                                      |
| Green, Gabrielle                   | Medical Doctor and PhD                                      | University of Oxford                                                      | United Kingdom of Great Britain and Northern Ireland (the) |
| Green, Peter                       | Geology - retired                                           | University of Sydney                                                      | Australia                                                  |
| Green, Michael                     | Professor Emeritus of Chemistry                             | City College of New York                                                  | United States of America (the)                             |
| Green, Madeline                    | Scientist/ Marine Biology                                   | University of Tasmania                                                    | Australia                                                  |
| Green, Paige                       | PhD candidate in Marine Ecology                             | Institute for Marine and Antarctic Studies                                | Australia                                                  |
| Green, David                       | PhD student - Marine and Antarctic Science                  | University of Tasmania                                                    | Australia                                                  |
| Green, Jemma                       | Conservation biologist                                      | University of Victoria                                                    | Canada                                                     |
| Greenaway, Elinor                  | Forest Ecologist                                            | PA DCNR BOF                                                               | United States of America (the)                             |
| Greenberg, Liana                   | Plant Science                                               | Wageningen University                                                     | Netherlands (the)                                          |
| Greenspan, Sasha                   | Postdoctoral researcher in amphibian disease ecology        | University of Alabama                                                     | United States of America (the)                             |
| Greenville, Aaron                  | Lecturer in Spatial Agricultural and Environmental Sciences | University of Sydney                                                      | Australia                                                  |
| Greenwood, Leanne                  | PhD student                                                 | Charles Sturt University                                                  | Australia                                                  |
| Greer, Gary                        | Professor, Biology (Plant Ecology)                          | Grand Valley State Univesity                                              | United States of America (the)                             |
| Greger-Schultze, Dr. med., Stephan | Deputy Head Doctor                                          | KfH Kuratorium für Dialyse und Nierentransplantation e. V.                | Germany                                                    |
| gregg, jillian                     | PhD Instructor                                              | Oregon State University                                                   | United States of America (the)                             |
| Gregoracci, Gustavo                | Professor Adjunto in Environmental Microbiology             | UNIFESP                                                                   | Brazil                                                     |
| Grégori, Gerald                    | Researcher                                                  | CNRS                                                                      | France                                                     |
| Gregory, Ph.D., Robert J.          | Retired Academic                                            |                                                                           | Australia                                                  |



|                      |                                                      |                                                                         |                                                            |
|----------------------|------------------------------------------------------|-------------------------------------------------------------------------|------------------------------------------------------------|
| Greguš, Jan          | gynecologist, philosopher                            | Center for Outpatient Gynecology; Center for Prenatal Diagnosis         | Czech Republic (the)                                       |
| Greilhuber, Irmgard  | University Professor                                 | University of Vienna                                                    | Austria                                                    |
| Greilinger, Marion   | Environmental Meteorology                            | Zentralanstalt für Meteorologie und Geodynamik (ZAMG)                   | Austria                                                    |
| Greiser, Caroline    | Researcher                                           | Department of Physical Geography, Stockholm University                  | Sweden                                                     |
| Grella, Stephanie    | Post doc                                             | Boston University                                                       | United States of America (the)                             |
| Grellier, Séraphine  |                                                      | University of Tours UMR7324 CNRS                                        | France                                                     |
| Gren, Eric           | Biology Professor                                    | University of Montana                                                   | United States of America (the)                             |
| Grenet, Thierry      | Physicist                                            | Institut Néel CNRS                                                      | France                                                     |
| Grenier, Stéphane    | Researcher                                           | CNRS                                                                    | France                                                     |
| Grenier, Mélanie     | Independant researcher                               |                                                                         | France                                                     |
| Grennerat, Vincent   | Electrical engineering teacher                       | IUT1 - UGA                                                              | France                                                     |
| Grenouillet, Gaël    | Associate Professor                                  | Lab EDB, Université Paul Sabatier Toulouse 3                            | France                                                     |
| Grether, Gregory     | Professor                                            | UCLA                                                                    | United States of America (the)                             |
| Grether, Greg        | Professor of Biology                                 | UCLA                                                                    | United States of America (the)                             |
| Greuter, Werner      | Univ. Professor emeritus, Botany                     | Hernarium Mediterraneum Panormitanum                                    | Italy                                                      |
| Grey, Louise         | Veterinary surgeon                                   | University of Sydney, BSc Hons                                          | Australia                                                  |
| Griebeler, Eva Maria | Professur, Ecology and Evolution                     | University of Mainz, iomE, Evolutionary Ecology                         | Germany                                                    |
| Griebler, Christian  | Head of Division of Limnology                        | University of Vienna                                                    | Austria                                                    |
| Grieco, Elisa        | Researcher                                           | National Research Council of Italy                                      | Italy                                                      |
| GRIECO, Elisa        | Researcher                                           | Foundation CMCC                                                         | Italy                                                      |
| Grieger, Khara       | Senior Research Scholar                              | North Carolina State University                                         | United States of America (the)                             |
| Gries, Dirk          | Lecturer, Ecology and Physiology                     | University of Goettingen, XLAB Experimental Laboratory for Young People | Germany                                                    |
| Griese, Julia        | Assistant Professor, Structural Biology              | Uppsala University                                                      | Sweden                                                     |
| Grieshop, Andrew     | Associate Professor, Environmental Engineering       | North Carolina State University                                         | United States of America (the)                             |
| Griffin, Duane       | Associate Prof. of Geography                         | Bucknell University                                                     | United States of America (the)                             |
| Griffin, John        | Retired geochemist working in science communications | UK Centre for Ecology and Hydrology                                     | United Kingdom of Great Britain and Northern Ireland (the) |
| Griffs-Kyle, Kerry   | Associate Professor Wildlife Ecology                 | Texas Tech University                                                   | United States of America (the)                             |
| Griffith, Gary       | Research Scientist Complex Adaptive Systems          | Norwegian Polar Institution                                             | Norway                                                     |
| Griffiths, Bronwen   | Environmental Scientist                              | Independent Freelancer                                                  | South Africa                                               |
| Griffiths, Adrienne  | Sociology Graduate Student                           | University of Utah                                                      | United States of America (the)                             |
| Griffiths, Thomas    | Earth Sciences (Geology)                             | University of Vienna                                                    | Austria                                                    |
| Grigg, Jennifer      | PhD Researcher - Marine Ecology                      | University of Exeter                                                    | United Kingdom of Great Britain and Northern Ireland (the) |
| Gril, Eva            | PhD student and research engineer in forest ecology  | EDYSAN (CNRS - University of Picardie Jules Verne)                      | France                                                     |
| Grilli, Roberto      | Research Scientist in Environmental Science          | CNRS - IGE                                                              | France                                                     |
| Grilo, Clara         | Researcher                                           | Cesam, University of Lisbon                                             | Portugal                                                   |
| Grimm, Nancy         | PhD, Professor, Ecology, Earth System Science        | Arizona State University                                                | United States of America (the)                             |

|                         |                                                                            |                                                                            |                                                            |
|-------------------------|----------------------------------------------------------------------------|----------------------------------------------------------------------------|------------------------------------------------------------|
| Grimm, Yolna            | Scientists                                                                 | Universitaet Leipzig                                                       | Germany                                                    |
| Grimm, Helmut           | PhD, Biologist, ecology                                                    | retired                                                                    | Germany                                                    |
| Grimsley, Nigel         | Research Director                                                          | CNRS and Sorbonne University                                               | France                                                     |
| Grimstead, Deanna       | Assistant Professor                                                        | Ohio State University                                                      | United States of America (the)                             |
| Grinath, Joshua         | Visiting Assistant Professor                                               | Idaho State University                                                     | United States of America (the)                             |
| Grinberg, Maurice       | Assoc. Prof.                                                               | New Bulgarian University                                                   | Bulgaria                                                   |
| Gringinger, Peter       | Environmental and Geosciences                                              |                                                                            | Austria                                                    |
| Grinman, Diego          | Postdoc                                                                    | Universidad de Buenos Aires                                                | Argentina                                                  |
| Grinspoon, David        | Senior Scientist                                                           | Planetary Science Institute                                                | United States of America (the)                             |
| Gripp, Anderson         | Post-Doc                                                                   | NUPEM-UFRJ                                                                 | Brazil                                                     |
| Grisel, Yann            | Mathematics teacher                                                        | Université Toulouse 3                                                      | France                                                     |
| Grobe, Hannes           | Geologist                                                                  | Alfred Wegener Institute for Polar- and Marine Research                    | Germany                                                    |
| Grobe, Peter            | Biodiversity Informatics                                                   | Leibniz Institute for Analysis of Biodiversity Change                      | Germany                                                    |
| Grobe, Lars Oliver      | Senior Research Associate                                                  | Lucerne University of Applied Sciences and Arts                            | Switzerland                                                |
| Grobler, B. Adriaan     | Plant Ecologist                                                            | Nelson Mandela University                                                  | South Africa                                               |
| Groenendijk, Jessica    | Communications Coordinator, Biologist                                      | San Diego Zoo Global Peru                                                  | Peru                                                       |
| Groenteman, Ronny       | Weed biocontrol                                                            |                                                                            | New Zealand                                                |
| Grogan, Paul            | Professor of Plant and Terrestrial Ecosystem Ecology                       | Queen's University                                                         | Canada                                                     |
| Groh, Ksenia            | Scientific Communication Officer, food contact chemicals and health        | Food Packaging Forum Foundation                                            | Switzerland                                                |
| Gronewold, Nadine       | Psychologist                                                               | University hospital Heidelberg                                             | Germany                                                    |
| Groom, Martha           | Professor of Biodiversity Conservation                                     | University of Washington Bothell and University of Washington              | United States of America (the)                             |
| Groome, Giles           | Ecologist                                                                  |                                                                            | United Kingdom of Great Britain and Northern Ireland (the) |
| Groot, Astrid           | Professor Population and Evolutionary Biology                              | Institute for Biodiversity and Ecosystem Dynamics, University of Amsterdam | Netherlands (the)                                          |
| Grootswagers, Tijn      | Postdoctoral Research Fellow in Cognitive Neuroscience                     | University of Sydney                                                       | Australia                                                  |
| Gros-Balthazard, Muriel | Evolutionary biologist                                                     | New York University Abu Dhabi                                              | United Arab Emirates (the)                                 |
| Grosbois, Guillaume     | Postdoctoral Researcher in Aquatic Ecology                                 | Université du Québec à Chicoutimi                                          | Canada                                                     |
| Gross, Louis            | Chancellor's Professor of Ecology and Evolutionary Biology and mathematics | University of Tennessee                                                    | United States of America (the)                             |
| Gross, Nicolas          | Researcher                                                                 | INRA                                                                       | France                                                     |
| Groß, Carla             | Energy Expert for energy efficiency                                        | no                                                                         | Germany                                                    |
| Groß, Jasmin            | Postdoctoral Research Fellow                                               | Helmholtz Institute for Functional Marine Biodiversity                     | Germany                                                    |
| Grossart, Hans-Peter    | Professor, Aquatic Microbial Ecology                                       | Leibniz Institute of Freshwater Ecology and Inland Fisheries (IGB)         | Germany                                                    |
| Größbacher, Verena      | PhD candidate in Animal Behaviour                                          | University of Natural Resources and Life Sciences, Vienna                  | Austria                                                    |

|                                          |                                                                                        |                                                               |                                                            |
|------------------------------------------|----------------------------------------------------------------------------------------|---------------------------------------------------------------|------------------------------------------------------------|
| Große, Fabian                            | Research Associate, Marine Modeling                                                    | University of Strathclyde                                     | United Kingdom of Great Britain and Northern Ireland (the) |
| Grosser, Stefanie                        | Postdoctoral Fellow in Conservation Genomics                                           | University of Otago                                           | New Zealand                                                |
| Grossi, Vincent                          | Research Director                                                                      | CNRS                                                          | France                                                     |
| Großkinsky, Dominik                      | Research Engineer, Bioresources/Plant Science                                          | AIT Austrian Institute of Technology                          | Austria                                                    |
| Größler, Andreas                         | Full Professor, Management                                                             | University of Stuttgart                                       | Germany                                                    |
| Grossman, Gary                           | Professor of Animal Ecology                                                            | University of Georgia                                         | United States of America (the)                             |
| Grossman, Richard                        | Affiliate Faculty, Department of Biology                                               | Fort Lewis College                                            | United States of America (the)                             |
| Großmann, Carsten                        | Lab engineer/ Chemical engineering - Technical chemistry                               | HTW Dresden                                                   | Germany                                                    |
| grosso, bernadette                       | Dr - technicians formation & recherche                                                 | université Paul Sabatier Toulouse                             | France                                                     |
| Grosso-Silva, José                       | Biologist, Entomology Curator                                                          | Museu de História Natural e da Ciência, Universidade do Porto | Portugal                                                   |
| Groton, James                            | Environmental Scientist/Wetland Ecologist                                              | Environmental Consultant                                      | United States of America (the)                             |
| Grove, Thomas                            | PhD, marine biology                                                                    | University of Edinburgh                                       | United Kingdom of Great Britain and Northern Ireland (the) |
| Gruau, Gérard                            | PhD, Research Director in Biogeochemistry and Water Pollution                          | CNRS, Rennes University                                       | France                                                     |
| Gruber, Monica                           | Research Fellow                                                                        | Victoria University of Wellington                             | New Zealand                                                |
| Gruber, Petra                            | Assoc. Prof. Biodesign                                                                 | Biomimicry Research and Innovation Center                     | United States of America (the)                             |
| Gruetzmacher, Kim                        | Biomedical Sciences                                                                    |                                                               | Germany                                                    |
| Grumbine, Robert                         | Professor (retired)                                                                    | Prescott College                                              | United States of America (the)                             |
| Grunauer, Michelle                       | Dean of the School of Medicine                                                         | Universidad San Francisco de Quito                            | Ecuador                                                    |
| Gründer, Stefan                          | Professor of Physiology                                                                | RWTH Aachen University                                        | Germany                                                    |
| Grunert, Tom                             | PhD Scientist in Microbiology                                                          | University of Veterinary Medicine Vienna                      | Austria                                                    |
| Grüning, Björn                           |                                                                                        | Uni-Freiburg                                                  | Germany                                                    |
| Grünwald, Thomas                         | Meteorology                                                                            | TU Dresden                                                    | Germany                                                    |
| Grünzweig, José                          | Prof. in ecology                                                                       | Hebrew University of Jerusalem                                | Israel                                                     |
| Gruszka, Damian                          | Assistant Professor, Plant Genetics                                                    | University of Silesia                                         | Poland                                                     |
| Grutter, Alexandra                       | Marine Biologist                                                                       | The University of Queensland                                  | Australia                                                  |
| Grzelak, Sylwia                          | PhD student, assistant                                                                 | Polish Academy of Sciences                                    | Poland                                                     |
| Gržetić, Zvonko                          | Oceanology and Hydrography- Croatian ex. director of national hydrographic center      | Naukowe Centrum Prawno - Informatyczne- NCPI-Warszawa         | Poland                                                     |
| Gsell, Alena                             | junior research group leader                                                           | Netherlands Institute of Ecology (NIOO-KNAW)                  | Netherlands (the)                                          |
| Guadarrama Olivera, María de los Ángeles | Bióloga                                                                                | Universidad Juárez Autónoma de Tabasco                        | Mexico                                                     |
| GUALLAR RIVERO, SANTIAGO                 | FIELD TECHNICIAN ORNITHOLOGY                                                           | MUSEUM OF NATURAL SCIENCES BARCELONA                          | Spain                                                      |
| Guallart, Javier                         | Doctor in Marine Biology                                                               | Independent - freelance researcher                            | Spain                                                      |
| Guaraldo, André de Camargo               | Professor                                                                              | Universidade Federal de Juiz de Fora                          | Brazil                                                     |
| Guardiola, Moisès                        | Associate Professor / Departament de Biologia Animal, de Biologia Vegetal i d'Ecologia | Universitat Autònoma de Barcelona                             | Spain                                                      |
| Guariento, Elia                          | PhD Student in Soil Ecology/Entomology                                                 | Eurac Research                                                | Italy                                                      |

|                                     |                                                                                         |                                                                                                 |                                |
|-------------------------------------|-----------------------------------------------------------------------------------------|-------------------------------------------------------------------------------------------------|--------------------------------|
| Guasch, Antoni                      | Assistant Professor, Modelling and simulation                                           | Universitat Politècnica de Catalunya                                                            | Spain                          |
| Guayasamin, Juan M                  | Professor/Researcher                                                                    | Universidad San Francisco de Quito                                                              | Ecuador                        |
| Guazzaroni, María Eugenia           | Professor                                                                               | FFCLRP-USP                                                                                      | Brazil                         |
| Gubert, Flore                       | Economist                                                                               | IRD                                                                                             | France                         |
| Gudmundsdottir Aspelund, Snaefridur | PhD student                                                                             | Reykjavik University                                                                            | Iceland                        |
| Guedes, Thaís                       | Senior Researcher                                                                       | State University of Maranhão                                                                    | Brazil                         |
| Guedes-Alonso, Rayco                | PhD Researcher                                                                          | Universidad de Las Palmas de Gran Canaria                                                       | Spain                          |
| Guédron, Stéphane                   | Environmental scientist                                                                 | Institute for research and development                                                          | France                         |
| gueguen, Laurent                    | associate professor bioinformatics                                                      | université Lyon 1                                                                               | France                         |
| Guenet, Bertrand                    | Biogeochemistry                                                                         | CNRS                                                                                            | France                         |
| Guerin, Alexis                      | Scientist Edible Mycorrhizal Fungi                                                      | The New Zealand Institute for Plant and Food Research                                           | New Zealand                    |
| Guernon, Stéphanie                  | Biologist                                                                               | UQAM                                                                                            | Canada                         |
| Guerra, Carlos António              | Post-Doc                                                                                | German Center for Integrative Biodiversity Research (iDiv)                                      | Germany                        |
| Guerra, Roberta                     | University Professor, Ocean Sciences                                                    | University of Bologna                                                                           | Italy                          |
| Guerreiro, Sandra Maria             | Teacher                                                                                 | University of Campinas                                                                          | Brazil                         |
| Guerreiro, Bruno                    | PhD Biochemistry                                                                        | Universidade Nova de Lisboa                                                                     | Portugal                       |
| Guerrero, José                      | Professor of Biogeography                                                               | Instituto de Ecología y Ciencias Ambientales, Facultad de Ciencias, Universidad de la República | Uruguay                        |
| Guerrero, Francisco                 | Professor - Ecology                                                                     | University of Jaén                                                                              | Spain                          |
| Guerrero-Casado, José               | Full Professor - PhD in Natural Resources Management                                    | Universidad Técnica de Manabí                                                                   | Ecuador                        |
| Guerrieri, Rossella                 | Assistant professor                                                                     | DISTAL, University of Bologna                                                                   | Italy                          |
| Guerrini, Alessandra                | Associate professor                                                                     | University of Ferrara                                                                           | Italy                          |
| Guevara, Giovany                    | Associate Professor                                                                     | Universidad del Tolima                                                                          | Colombia                       |
| Guével, Alexandre                   | Postdoctoral Associate                                                                  | Duke University                                                                                 | United States of America (the) |
| Guidetti, Paolo                     | Full Prof Ecology                                                                       | University of Nice Sophia Antipolis                                                             | France                         |
| Guidetti, Roberto                   | Associated Professo in Zoology                                                          | University of Modena and Reggio Emilia                                                          | Italy                          |
| GUIDI, Daniele                      | Managing director and founder of Ecosoluzioni, energy and environmental consulting firm | Harvard University - HKS (alumni)                                                               | Italy                          |
| Guilbert, Eric                      | Associate Professor Entomologist                                                        | Museum national d'histoire naturelle                                                            | France                         |
| Guilbert, Aurelie                   | Astrophysicist                                                                          | CNRS                                                                                            | France                         |
| Guilcher, Marine                    | PhD student                                                                             | INRA                                                                                            | France                         |
| Guilet, Jérôme                      | Astrophysicist                                                                          | CEA - Astrophysics Department                                                                   | France                         |
| Guilford, Parry                     | Research Professor, Cancer Genetics                                                     | University of Otago                                                                             | New Zealand                    |
| Guilhaumon, François                | research scientist                                                                      | IRD - MARBEC                                                                                    | France                         |
| Guilherme, João L.                  | Early Career Researcher                                                                 | Centre d'Ecologie Fonctionnelle et Evolutive (CEFE - CNRS)                                      | France                         |
| Guilherme, Frederico                | Professor Associado                                                                     | Universidade Federal de Jataí                                                                   | Brazil                         |
| Guillard, Jean                      | Limnology                                                                               | INRA                                                                                            | France                         |

|                               |                                                                         |                                                             |                                                            |
|-------------------------------|-------------------------------------------------------------------------|-------------------------------------------------------------|------------------------------------------------------------|
| GUILLAUME, Astrid             | Assistant Professor (Semiotics)                                         | Sorbonne University                                         | France                                                     |
| GUILLEBAUD, JOHN              | Emeritus Professor of Family Planning & Reproductive Health             | University College London                                   | United Kingdom of Great Britain and Northern Ireland (the) |
| GUILLEMOT, Joannès            | Researcher                                                              | Cirad                                                       | France                                                     |
| Guillet, Bruno                | Associate professor (applied physics)                                   | Caen Normandy university                                    | France                                                     |
| Guilley, Elsa                 | Student in an engineer school (agronomics)                              | Bordeaux Sciences Agro                                      | France                                                     |
| Guillonneau, Richard          | Research fellow                                                         | University of Warwick                                       | United Kingdom of Great Britain and Northern Ireland (the) |
| Guillot, Sebastien            | Astrophysics                                                            | IRAP                                                        | France                                                     |
| Guilloteau, Stéphane          | Astrophysicist                                                          | CNRS - Université de Bordeaux                               | France                                                     |
| Guillou, Emmanuelle           | Biology                                                                 | University                                                  | France                                                     |
| Guillou, Léonard              | PhD student in Cognitive Sciences (Evolution and Social Cognition team) | Institut Jean Nicod / LNC2, Ecole Normale Supérieure, Paris | France                                                     |
| Guimarães, Carlos             | PhD Student                                                             | 3B's Research Group - University of Minho                   | Portugal                                                   |
| GUIMARÃES, MARIA BEATRIZ      | University Professor                                                    | Federal University of Pernambuco                            | Brazil                                                     |
| Guimarães Nobre, Regina Lúcia | PhD student in Ecology                                                  | UFRN                                                        | Brazil                                                     |
| Guimbretière, Guillaume       | Associate Researcher                                                    | CNRS (LACy UM8105)                                          | France                                                     |
| GUINAND, Bruno                | Associate Professor                                                     | Université de Montpellier / University of Montpellier       | France                                                     |
| Guinet, Maé                   | PhD - Agronomy                                                          | INRA                                                        | France                                                     |
| Guiomar, Nuno                 | Researcher                                                              | ICAAM, University of Évora                                  | Portugal                                                   |
| GUIOT, JOEL                   | Professor climatology                                                   | CNRS                                                        | France                                                     |
| Guisan, Antoine               | Professor of Ecology                                                    | Université de Lausanne                                      | Switzerland                                                |
| Guiscafré, Agustín            | Biologist                                                               | Dept. Ecology & Environmental Sc., Maimonides University    | Argentina                                                  |
| Guitet, Stéphane              | Forest Engineer, Doctor (Tropical Ecology)                              | IGN                                                         | France                                                     |
| Guix, Juan Carlos             | Ecology - NeoPangea Project                                             | University of Barcelona                                     | Spain                                                      |
| Gullan, Penelope              | Emeritus Professor                                                      | The Australian National University                          | Australia                                                  |
| Gumbs, Rikki                  | PhD Student                                                             | Imperial College London                                     | United Kingdom of Great Britain and Northern Ireland (the) |
| Gunczy, Johanna               | Zoologie, Biodiversity, Carabidae                                       | Museum Joanneum, Graz, Austria                              | Austria                                                    |
| Gunnarsson, Gunnar            | Associate professor in Animal Ecology                                   | Kristianstad University                                     | Sweden                                                     |
| Gunnarsson, Tómas Grétar      | Research professor in ecology                                           | University of Iceland                                       | Iceland                                                    |
| GUNTHER, ANDREW               | Environmental Science                                                   | Center for Ecosystem Management & Restoration               | United States of America (the)                             |
| Günther, Linus                | Postdoctoral researcher in Evolutionary Biology                         | Museum für Naturkunde Berlin                                | Germany                                                    |
| gunton, thomas                | Director, Resource and Environmental Planning Program                   | Simon Fraser University                                     | Canada                                                     |
| Gunzburg, Daniel              | Environmental Scientist                                                 | James Cook University                                       | Australia                                                  |
| GUO, Jing                     | Phd Student in public health                                            | Curtin University                                           | Australia                                                  |
| Gupta, Vijai Kumar            | Senior Scientist                                                        | Estonian University of Life Sciences, Tartu                 | Estonia                                                    |
| Gupta, Kailash                | Veterinarian/Neuroscientist                                             | Ex-CPSC                                                     | United States of America (the)                             |
| Gupta, Mukesh                 | Post-doctoral Researcher Remote Sensing/Geophysics of Cryosphere        |                                                             | Canada                                                     |

|                                       |                                                                 |                                                                                                      |                                |
|---------------------------------------|-----------------------------------------------------------------|------------------------------------------------------------------------------------------------------|--------------------------------|
| Gupta, Abhik                          | Former Professor, Department of Ecology & Environmental Science | Assam University, Silchar                                                                            | India                          |
| Gurevitch, Jessica                    | Distinguished Professor; Ecology and Evolution                  | Stony Brook University                                                                               | United States of America (the) |
| Gurgel, Ely                           | Research                                                        | Museu Paraense Emílio Goeldi                                                                         | Brazil                         |
| Gurnani Serrano, Carlos Karan         | PhD student                                                     | University of Milan                                                                                  | Italy                          |
| Gurpide, Andres                       | Astrophysics                                                    | Institut de Recherche en Astrophysique et Planétologie (IRAP)                                        | France                         |
| Gurvich, Diego E.                     | Independent Researcher                                          | CONICET-UNC                                                                                          | Argentina                      |
| Gurvich, Diego                        | Professor, PhD                                                  | Universidad Nacional de Córdoba                                                                      | Argentina                      |
| Guschanski, Katerina                  | Group leader, Evolutionary Biology                              | Uppsala University                                                                                   | Sweden                         |
| Guseva, Serafima                      | PhD student                                                     | Institute of Structural Biology, Grenoble                                                            | France                         |
| Gusman ferraz, José Maria             | Professor/ agroecology                                          | Unicamp / Uniara                                                                                     | Brazil                         |
| Gusmão, Ana Carolina                  | BSc. Oceanography                                               | USP - University of São Paulo                                                                        | Brazil                         |
| Gust, Juliane                         | Physician Scientist, Pediatric Neurology                        | Seattle Children's/University of Washington                                                          | United States of America (the) |
| Gustafsson, Robert                    | Postdoctoral researcher, Structural Biology                     | Uppsala University                                                                                   | Sweden                         |
| Gustavsson, Emil                      | Principal research engineer in chemistry                        | University of Gothenburg                                                                             | Sweden                         |
| Gustavsson, Eva                       | PhD, Senior lecturer                                            | Dep of Conservation, University of Gothenburg                                                        | Sweden                         |
| Gutenstein, Marloes                   | Atmospheric Scientist                                           | German Meteorological Service                                                                        | Germany                        |
| Guth, Miriam Karen                    | Forestry                                                        |                                                                                                      | Germany                        |
| Guthke, Reinhard                      | Professor of Systems Biology                                    | Leibniz Institute for Natural Product Research and Infection Biology –Hans Knöll Institute (HKI)     | Germany                        |
| Gutierrez, Ana                        | PhD                                                             | IST                                                                                                  | Austria                        |
| Gutierrez, Marco                      | PhD Candidate                                                   | RMIT University                                                                                      | Australia                      |
| Gutierrez, Luis                       | Editor                                                          | Mother Pelican Journal                                                                               | United States of America (the) |
| Gutierrez, Andrew Paul                | Professor Emeritus                                              | University of California at Berkeley                                                                 | United States of America (the) |
| Gutierrez Robledo, Luis Miguel        | Director General                                                | Instituto Nacional de Geriatria                                                                      | Mexico                         |
| Gutierrez-Adan, Alfonso               | Professor                                                       | INIA                                                                                                 | Spain                          |
| Gutiérrez-Cánovas, Cayetano           | Postdoc researcher - Ecology                                    | University of Minho                                                                                  | Portugal                       |
| Gutiérrez-Cárdenas, Paul Davi Alfonso | Associate professor -herpetology                                | Departamento de Ciencias Biológicas, Facultad de Ciencias Exactas y Naturales, Universidad de Caldas | Colombia                       |
| Gutiérrez-Expósito, Carlos            | PhD student Conservation Biology                                | Estación Biológica de Doñana                                                                         | Spain                          |
| Gutierrez-Fonseca, Pablo              | Biology                                                         | University of Costa Rica                                                                             | Costa Rica                     |
| Gutleb, Arno                          | Group Leader                                                    | Environmental Scientist / Toxicologist                                                               | Luxembourg                     |
| Gutner, Rachel                        | MS Student, Evolutionary Biology                                | California State University, Northridge                                                              | United States of America (the) |
| Gutsche, Irina                        | Researcher in structural biology                                | Institut de Biologie Structurale                                                                     | France                         |
| Gutsche-Jones, Fanny                  | Community Manager                                               | Citizen Science Center Zurich                                                                        | Switzerland                    |
| Guuroh, Reginald Tang                 | Research Scientist                                              | Council for Scientific and Industrial Research - Forestry Research Institute of Ghana                | Ghana                          |
| Guy-Haim, Tamar                       | Marine Biology researcher                                       | Israel Oceanography and Limnology Research                                                           | Israel                         |
| Guyon, Frédéric                       | Sociologie                                                      | Universite de Franche-Comté                                                                          | France                         |
| Guzmán-Jacob, Valeria                 | PhD. student. Biodiversity and Ecology                          | University of Göttingen                                                                              | Germany                        |
| Guzy, Anna                            | Phd                                                             | University of Silesia                                                                                | Poland                         |

|                       |                                                                         |                                                              |                                                            |
|-----------------------|-------------------------------------------------------------------------|--------------------------------------------------------------|------------------------------------------------------------|
| Gwedla, Nanamhla      | PhD Candidate- Urban Ecology                                            | Rhodes University                                            | South Africa                                               |
| Gwynne-Jones, Richard | Master of Biology (Marine and Freshwater)                               | Blue Domain                                                  | United Kingdom of Great Britain and Northern Ireland (the) |
| H. N. Chong, Mike     | Independent ornithologist/naturalist                                    | Oriental Bird Club Country representative                    | Malaysia                                                   |
| Haanappel, Evert      | Biophysicist                                                            | CNRS                                                         | France                                                     |
| Haapakoski, Marko     | Post doc researcher / Ecology                                           | University of Jyväskylä / Konnevesi Research Station         | Finland                                                    |
| Haas, Traugott        | Künstlerisch- Wissenschaftlicher Mitarbeiter                            | Universität Vechta                                           | Germany                                                    |
| Haas, Edwin           | Senios Scientist Greenhouse Gas Emissions (N2O)                         | Karlsruhe Institute of Technology (KIT)                      | Germany                                                    |
| Haber, Istvan         | assistant professor                                                     | University of Pecs                                           | Hungary                                                    |
| Haber, Ariela         | Post doc                                                                |                                                              | United States of America (the)                             |
| Haberkern, Andrea     | PhD student of Zoology                                                  | UBC                                                          | Canada                                                     |
| Haberlin, Damien      | Research Scientist                                                      | University College Cork                                      | Ireland                                                    |
| Haberstroh, Simon     | PhD student                                                             |                                                              | Germany                                                    |
| Habibzadeh, Nader     | Assistant professor/Environmental science                               | Islamic Azad University                                      | Iran (Islamic Republic of)                                 |
| Habit, Evelyn         | Professor                                                               | Facultad de Ciencias Ambientales. Universidad de Concepción. | Chile                                                      |
| Hackenberg, Jan       | Tree Biomass modeling                                                   | IGN - French forest inventory                                | Germany                                                    |
| Hacker, Friedrich     | Landscape Ecology                                                       | Institut für Landschaftsökologie und Naturschutz             | Germany                                                    |
| Hackl, Lukas          | Environmental Engineering                                               | UC Berkeley                                                  | United States of America (the)                             |
| Hacquin, Anne-Sophie  | Research Engineer in Cognitive Science                                  | ENS                                                          | France                                                     |
| Haddad, Stephanie     | Research assistant                                                      | Queens                                                       | Canada                                                     |
| Haddad, Célio         | Professor of Vertebrate Zoology                                         | Universidade Estadual Paulista (UNESP)                       | Brazil                                                     |
| Haddock, Joanna       | PhD in Ecology                                                          | The University of Sydney                                     | Australia                                                  |
| Hadfield, Michael G.  | Biology                                                                 | University of Hawaii at Manoa                                | Uruguay                                                    |
| Hadfield, Michael     | Professor of Biology Emeritus                                           | University of Hawaii at Manoa                                | United States of America (the)                             |
| Hadjeras, Lydia       | Postdoctoral researcher                                                 |                                                              | Germany                                                    |
| Hadjoannou, Louis     | Research Director                                                       | Enalia Physis Environmental Research Centre                  | Cyprus                                                     |
| Hadly, Elizabeth      | Professor of Biology                                                    | Stanford University                                          | United States of America (the)                             |
| Haechler, Iwan        | Phd Student, Thermodynamics                                             | ETH Zurich                                                   | Switzerland                                                |
| Haed, Jason           | University Lecturer                                                     | University of Cambridge                                      | United Kingdom of Great Britain and Northern Ireland (the) |
| haegele, anna         | medical doctor                                                          |                                                              | Germany                                                    |
| Haegli, Pascal        | Assistant Professor, Resource and Environmental Management              | Simon Fraser University                                      | Canada                                                     |
| Haeger, Christof      | Physicist, Dr. in Chemistry, PhD Thesis in Global Biogeochemical Cycles | ICH Institut Christof Haeger                                 | Germany                                                    |
| Haesler, Marcel       | lab manager                                                             | University of Bern/Eawag                                     | Switzerland                                                |
| Hagan, Emily          |                                                                         | Hagan                                                        | United States of America (the)                             |
| Hage, Joseph          | Biology Professor/Researcher                                            | Algonquin college Ottawa                                     | Canada                                                     |
| Hagedorn, Gregor      | Senior Scientist                                                        | Museum für Naturkunde                                        | Germany                                                    |
| Haggard, Judy         | Wildlife biologist                                                      | Retired                                                      | United States of America (the)                             |
| Hagge, Jonas          | Forest ecology                                                          | Technical University of Munich                               | Germany                                                    |

|                          |                                                     |                                                                                      |                                                            |
|--------------------------|-----------------------------------------------------|--------------------------------------------------------------------------------------|------------------------------------------------------------|
| Hagolle, Olivier         |                                                     | CESBIO                                                                               | France                                                     |
| Haguet, Vincent          | Engineering                                         | CEA                                                                                  | France                                                     |
| Hahn, Thomas             | Associate Professor in Ecological Economics         | Stockholm University                                                                 | Sweden                                                     |
| Hahn, Dr. Aljoscha Maria | Physics                                             | Martin-Buber-Oberschule Berlin                                                       | Germany                                                    |
| Haigh, Amy               | Zoology                                             | University College Dublin                                                            | Ireland                                                    |
| Haigh, Anthony           | Senior Lecturer in Plant Biology                    | Western Sydney University                                                            | Australia                                                  |
| Haimerl, Gerhard         | Hydraulic Engineering                               | Biberach University of Applied Sciences                                              | Germany                                                    |
| Haines, Andrew           | Professor of Environmental Change and Public Health | London School of Hygiene and Tropical Medicine                                       | United Kingdom of Great Britain and Northern Ireland (the) |
| Haining, Brianna         | PhD Candidate, Plant Science                        | University of California Berkeley                                                    | United States of America (the)                             |
| Hajduczyk, Jesica        | Doctoral Student                                    | IMBIV                                                                                | Argentina                                                  |
| Hajdukovic, Dragan       | Physics and Cosmology                               | Sustainable Society on Earth Foundation                                              | Montenegro                                                 |
| Hakala, Kirsti           | PhD Researcher                                      | University of Zurich                                                                 | Switzerland                                                |
| Hakala, Emma             | Senior Visiting Fellow                              | Finnish Institute of International Affairs                                           | Finland                                                    |
| Hake, Sarah              | Adjunct Professor and Center Director               | Plant Gene Expression Center, Agricultural Research Service                          | United States of America (the)                             |
| Haklay, Mordechai        | Professor of Geographical Information Science       | UCL                                                                                  | United Kingdom of Great Britain and Northern Ireland (the) |
| Halabowski, Dariusz      | Hydrobiology                                        | University of Silesia in Katowice                                                    | Poland                                                     |
| Halajian, Ali            | Senior Researcher                                   | University of Limpopo                                                                | South Africa                                               |
| Halat, Zuzanna           | PhD student                                         |                                                                                      | Poland                                                     |
| Halbert-Howard, Aladdin  | Horticultural Research Assistant                    | Leibniz-Institute of Vegetable and Ornamental Crops (IGZ)                            | Germany                                                    |
| Halbritter, Aud Helen    | Researcher                                          | University of Bergen                                                                 | Norway                                                     |
| Hale, Brack              | Professor of Biology and Environmental Science      | Franklin University Switzerland                                                      | Switzerland                                                |
| Hale, Susanne            | Climate Agroforestry researcher                     | University of Massachusetts Amherst / Tending the Wild Climate Agroforestry Research | United States of America (the)                             |
| HALEN, Henri             | Invited profesor soil science                       | Université or Louvain                                                                | Belgium                                                    |
| Hales, Karen             | Professor of Biology                                | Davidson College                                                                     | United States of America (the)                             |
| Hales, Simon             | Research Associate Professor                        | University of Otago                                                                  | New Zealand                                                |
| Halfter, Norbert         | Chemistry                                           | TU Dresden                                                                           | Germany                                                    |
| Hall, Steven             | Assistant Professor of Biogeochemistry              | Iowa State University                                                                | United States of America (the)                             |
| Hall, William P.         | Retired [PhD Evolutionary Biology, Harvard, 1973]   | Hon. Associate, eScholarship Research Centre, Univ. Melbourne                        | Australia                                                  |
| Hall, Jane               | Wildlife Health                                     |                                                                                      | Australia                                                  |
| Hall, Mark               | Postdoctoral Research Fellow                        | Western Sydney University                                                            | Australia                                                  |
| Hall, Roberta            | Professor of Anthropology, Emeritus                 | Oregon State University                                                              | United States of America (the)                             |
| Hall, Melinda            | PhD, Physical Oceanography, research specialist     | Woods Hole Oceanographic Institution                                                 | United States of America (the)                             |
| Hall, Richard            | Assistant Professor, Ecology                        | Odum School of Ecology, University of Georgia                                        | United States of America (the)                             |
| Hall, Hannah             | Research Technician                                 | University of California, Irvine                                                     | United States of America (the)                             |
| Hall-Spencer, Jason      | Professor of Marine Biology                         | Universities of Plymouth (UK) and Tsukuba (Japan)                                    | United Kingdom of Great Britain and Northern Ireland (the) |



|                               |                                                                       |                                                             |                                                            |
|-------------------------------|-----------------------------------------------------------------------|-------------------------------------------------------------|------------------------------------------------------------|
| Halleran, Patricia C.         | Ph.D. Student, Applied Anthropology                                   | Oregon State University                                     | United States of America (the)                             |
| Hallett, Mark                 | Assistant Research Professor of Biology-Retired                       | Indiana University                                          | United States of America (the)                             |
| Hallewell, Gregory            | Physicist, Particle Physics                                           | Centre de Physique des Particules de Marseille (CNRS/IN2P3) | France                                                     |
| Hallgrímsson, Gunnar Thor     | Professor of zoology                                                  | University of Iceland                                       | Iceland                                                    |
| Halligan, John Gerard Anthony | Psychology/Neuroscience/Cell Biology                                  | University College Dublin                                   | Ireland                                                    |
| Halloran, Maddie              | Fisheries Biologist/Master's Student                                  | Humboldt State University                                   | United States of America (the)                             |
| Halmer, Daniel                | tracegas analysis                                                     | HH university Düsseldorf, Germany                           | Germany                                                    |
| Halmo, David                  | Anthropologist                                                        | EnvAnthro Consulting, LLC                                   | United States of America (the)                             |
| Halpenny, Elizabeth           | Associate Professor / Social Scientist                                | University of Alberta                                       | Canada                                                     |
| Halperin, Alexander           | Professor                                                             | Salisbury University                                        | United States of America (the)                             |
| Halpin, Luke                  | Ecologist and PhD Candidate                                           | Monash University                                           | Australia                                                  |
| Halsey, Richard               | Director/Ecology                                                      | California Chaparral Institute                              | United States of America (the)                             |
| Halupka, Lucyna               | Associate Professor, Biological Sciences                              | University of Wrocław                                       | Poland                                                     |
| Halupka, Lucyna               | biology                                                               | Wrocław University                                          | Poland                                                     |
| Hämäläinen, Hans              | Postdoctoral researcher / Social sciences                             | University of Turku                                         | Finland                                                    |
| Hämäläinen, Anni              | Adjunct Research                                                      | Jagiellonian University                                     | Poland                                                     |
| Hambach, Ulrich               | Senior Scientist, Geography/Geocology/Quaternary Research             | University of Bayreuth                                      | Germany                                                    |
| Hambrey, Michael              | Emeritus Professor of Glaciology                                      | Aberystwyth University                                      | United Kingdom of Great Britain and Northern Ireland (the) |
| Hamel, Nathalie               | Ecosystem analyst                                                     | Puget Sound Partnership                                     | United States of America (the)                             |
| Hamel, Sandra                 | Associate Professor                                                   | Université Laval                                            | Canada                                                     |
| Hamelin, Jérôme               | Senior Researcher in Microbial Ecology                                | INRA                                                        | France                                                     |
| Hamelin, Claire               | PhD                                                                   | CEA                                                         | France                                                     |
| Hames, Fern                   |                                                                       | Arthur Rylah Institute for Environmental Research           | Australia                                                  |
| Hamilton, Alison              | Assistant Teaching Professor, Biological Sciences                     | University of Massachusetts, Lowell                         | United States of America (the)                             |
| Hamilton, Martin              | Botanist                                                              | Royal Botanic Gardens, Kew                                  | United Kingdom of Great Britain and Northern Ireland (the) |
| Hamilton, Terry               | Environmental Scientist                                               |                                                             | United States of America (the)                             |
| Hamilton, Mark                | Fisheries Research Assistant                                          | NAFC Marine Centre                                          | United Kingdom of Great Britain and Northern Ireland (the) |
| Hamm, Joshua                  | Graduate Student                                                      | UNSW                                                        | Australia                                                  |
| Hammecker, Claude             | Senior researcher                                                     | IRD                                                         | France                                                     |
| Hammelehle, Andreas           | Applied sciences in organic agriculture                               | Landesbetrieb Landwirtschaft Hessen                         | Germany                                                    |
| Hammerschmidt, Thomas         | Professor Management/Pharmaceutical Industry                          | Technical University of Applied Sciences Rosenheim          | Germany                                                    |
| Hammett, Julia                | Anthropology Professor / Ecological Anthropology                      | Truckee Meadows Community College                           | United States of America (the)                             |
| Hammond, Keith                | Retired, Senior Officer, Animal Genetic Resources                     | Food & Agriculture of the United Nations                    | Australia                                                  |
| Hampe, Arndt                  | Senior scientist                                                      | INRA                                                        | France                                                     |
| Hampton, Shaun Reid           | Palaeoclimatologist Environmental Sustainability and Green technology | Keele University, UK                                        | United Kingdom of Great Britain and Northern Ireland (the) |
| Hanbury, Hugo                 | Research Associate                                                    | Centre of Development and Environment                       | Switzerland                                                |

|                          |                                                                                   |                                                                           |                                                            |
|--------------------------|-----------------------------------------------------------------------------------|---------------------------------------------------------------------------|------------------------------------------------------------|
| Hancart Petitet, Pascale | Researcher, anthropology                                                          | Institut de Recherche pour le Developpement                               | France                                                     |
| Hance, Thierry           | Professor                                                                         | Université catholique de Louvain                                          | Belgium                                                    |
| Hancock, Trevor          | Retired Professor, Public Health                                                  | School of Public Health and Social Policy, University of Victoria         | Canada                                                     |
| Hancock, Nola            | Postdoctoral Researcher                                                           | Macquarie University                                                      | Australia                                                  |
| Hancock, Dawson          | Professor of Educational Research                                                 | UNC Charlotte                                                             | United States of America (the)                             |
| Handley, Claire          | Clinical Psychology                                                               | Bangor university                                                         | United Kingdom of Great Britain and Northern Ireland (the) |
| Hänel, Anne              | B.Sc., Master Student, Biology                                                    |                                                                           | Germany                                                    |
| Hanford, Jayne           | PhD student, freshwater ecology                                                   | The University of Sydney                                                  | Australia                                                  |
| HANKEN, James            | Director                                                                          | Harvard Museum of Comparative Zoology                                     | United States of America (the)                             |
| Hankins, Richard         | Engineering                                                                       | Cambridge University                                                      | United Kingdom of Great Britain and Northern Ireland (the) |
| Hanna, Dr Liz            | Climate Change & Human Health Researcher                                          | Australian National University                                            | Australia                                                  |
| Hanna, David             | Emeritus professor of Physics                                                     | University of Southampton                                                 | United Kingdom of Great Britain and Northern Ireland (the) |
| Hannam, Kirsten          | Agroecology                                                                       | Agriculture and Agri-Food Canada                                          | Canada                                                     |
| Hanneman, Debra          | CEO                                                                               | Whitehall Geogroup, Inc.                                                  | United States of America (the)                             |
| Hanner, Robert           | Professor, Integrative Biology                                                    | University of Guelph                                                      | Canada                                                     |
| HÄNNI, Catherine         | Researcher, Research Director, Evolutionary sciences, biodiversity, Bioarchaelogy | CNRS                                                                      | France                                                     |
| Hannula, Emilia          | Resercher in microbial ecology                                                    | Netherlands Institute of Ecology                                          | Netherlands (the)                                          |
| Hanold, PhD, Dagmar      | plant virologist                                                                  |                                                                           | Australia                                                  |
| HANOT, Pauline           | Postdoctoral researcher                                                           | Max Planck Institute for the Science of Human History                     | Germany                                                    |
| Hanrieder, Natalie       | Meteorologist                                                                     | German Aerospace Center DLR                                               | Germany                                                    |
| Hanschen, Franziska S.   | Research Group Leader, Food Chemist                                               | Leibniz Institute of Vegetable and Ornamental Crops (IGZ) e.V.            | Germany                                                    |
| Hänsel, Patrick          | PhD student in Geosciences                                                        | GeoZentrum Nordbayern                                                     | Germany                                                    |
| Hansen, Christian        | Scientific Associate                                                              | Center for Marine Environmental Sciences (MARUM)                          | Germany                                                    |
| Hansen, Marten           | PhD, Molecular Biologist                                                          |                                                                           | Netherlands (the)                                          |
| Hansen, Dennis           | Tropical Ecology                                                                  | University of Zurich                                                      | Switzerland                                                |
| Hansen, Dominique        | Marine ecology and evolutionary biology                                           |                                                                           | United States of America (the)                             |
| Hansen, Jennifer         | Landscape Ecologist                                                               | University of South-Eastern Norway                                        | Norway                                                     |
| Hansen, James            | Environmental Scientist                                                           |                                                                           | United States of America (the)                             |
| Hansen, Lara             | Chief Scientist                                                                   | EcoAdapt                                                                  | United States of America (the)                             |
| Hansen, Julia            | Master Student                                                                    | Ruprecht-Karls-Universität Heidelberg                                     | Germany                                                    |
| Hanß, Sebastian          |                                                                                   | Department of Ecosystem Modelling Büsgen-Institut University of Göttingen | Germany                                                    |
| Hansson, Lon             | PhD student                                                                       | Stockholm University                                                      | Sweden                                                     |
| Hansul, Simon            | Phd student                                                                       | Ghent University                                                          | Belgium                                                    |
| Hanukoglu, Israel        | Professor of Biochemistry                                                         | Ariel University                                                          | Israel                                                     |
| HANUS, Cyril             | Group leader                                                                      | Inserm                                                                    | France                                                     |

|                                  |                                                             |                                                                    |                                                            |
|----------------------------------|-------------------------------------------------------------|--------------------------------------------------------------------|------------------------------------------------------------|
| Harbor, Jonathan                 | Departments of Geography and Geosciences                    | University of Montana                                              | United States of America (the)                             |
| Harbottle, Michael               | Senior Lecturer, Geoenvironmental Engineering               | Cardiff University                                                 | United Kingdom of Great Britain and Northern Ireland (the) |
| Harbour, Sophie                  | Paediatric Registrar, Medicine                              | Dorset County Hospital                                             | United Kingdom of Great Britain and Northern Ireland (the) |
| Harbour, Lindsey                 | Obstetrician Gynecologist                                   | Auckland City Hospital                                             | New Zealand                                                |
| Harbour, Gary                    | Medicinal Biochemistry                                      | University of Illinois                                             | United States of America (the)                             |
| Harcourt, Rob                    | Professor of Marine Ecology                                 | Macquarie University                                               | Australia                                                  |
| Harcourt, William                | PhD Student                                                 | University of St Andrews                                           | United Kingdom of Great Britain and Northern Ireland (the) |
| Hardcastle, Kathryn              | CEO of Environmental NGO / BSc EnvSc                        | Murdoch University, Australia                                      | United Kingdom of Great Britain and Northern Ireland (the) |
| Hardenbol, Alwin                 | Early stage researcher in forest ecology                    | University of Eastern Finland                                      | Finland                                                    |
| Harding, Bill                    | Aquatic Science/Environmental Law                           | DH Environmental Consulting (Pty) Ltd                              | South Africa                                               |
| Harding, Cheryl                  | Professor Emerita                                           | Hunter College, CUNY                                               | United States of America (the)                             |
| Harding, Jon                     | Professor of freshwater ecology                             | University of Canterbury                                           | New Zealand                                                |
| Hardman, Francisco Foot          | Full Professor in Cultural Studies                          | State University of Campinas (UNICAMP)                             | Brazil                                                     |
| Hardy, Sam                       | Postdoctoral Research Scientist                             | University of Leeds                                                | United Kingdom of Great Britain and Northern Ireland (the) |
| Hardy, Douglas                   | Senior Research Fellow                                      | University of Massachusetts Amherst                                | United States of America (the)                             |
| Hardy, Ian C.W.                  | Associate Professor and Reader in Animal Population Biology | University of Nottingham                                           | United Kingdom of Great Britain and Northern Ireland (the) |
| Haring, Michel                   | Professor in Plant Physiology                               | SILS, University of Amsterdam                                      | Netherlands (the)                                          |
| Harisoa Mampionona, RAKOTONIRINA | PhD candidate / Architecture                                | Université Grenoble Alpes                                          | France                                                     |
| Haritashya, Umesh                | Associate Professor / Glacial Geologist                     | University of Dayton                                               | United States of America (the)                             |
| Harle, J. Rodney                 | Geneticist                                                  | Retired                                                            | Canada                                                     |
| Harmackova, Zuzana               | Postdoctoral researcher in sustainability science           | Stockholm Resilience Centre                                        | Sweden                                                     |
| Harms, Kyle                      | Professor                                                   | Louisiana State University                                         | United States of America (the)                             |
| Harnad, Stevan                   | Professor of Cognitive Science                              | Université du Québec à Montréal                                    | Canada                                                     |
| Harnett, Julianne                | Astrophysicist                                              | University of Sydney                                               | Australia                                                  |
| Harnisch, Brian                  | Senior Research Scientist                                   | University of Wyoming                                              | United States of America (the)                             |
| Harnos, Andrea                   | associate professor, statistics                             | University of Veterinary Medicine Budapest                         | Hungary                                                    |
| Harpenslager, Sarah Faye         | Postdoctoral Researcher                                     | Leibniz-Institute of Freshwater Ecology and Inland Fisheries (IGB) | Germany                                                    |
| Harper, Ashleigh                 | PhD student                                                 | Swansea University                                                 | United Kingdom of Great Britain and Northern Ireland (the) |
| Harper, David                    | Geography-Planning                                          |                                                                    | Canada                                                     |
| HARPIN, RAYMOND                  | GEOLOGIST                                                   | ACTION ENVIRONMENTAL                                               | United States of America (the)                             |
| Harre, Kathrin                   | Professor for Technical Chemistry                           | Hochschule für Technik und Wirtschaft Dresden                      | Germany                                                    |
| Harrington, Jacquelyn            | Research Support Specialist                                 | Cornell University                                                 | United States of America (the)                             |
| Harris, James                    | Chesebrough Professor ofElectrical Engineering              | Stanford University                                                | United States of America (the)                             |

|                              |                                                               |                                                      |                                                            |
|------------------------------|---------------------------------------------------------------|------------------------------------------------------|------------------------------------------------------------|
| Harris, Rebecca              | Lecturer in Climatology and climate impacts researcher        | University of Tasmania                               | Australia                                                  |
| Harris, Sara                 | Professor                                                     | University of British Columbia                       | Canada                                                     |
| Harris, Richard              | Biochemistry                                                  | Retired                                              | United States of America (the)                             |
| Harris, Emma                 | Head of Scientific Development and Academic Relations         | Humane Solutions Inc                                 | Canada                                                     |
| Harris, John                 | Adjunct Associate Professor                                   | UNSW Sydney                                          | Australia                                                  |
| Harrison, Rachel             | Postdoctoral researcher                                       | Universite de Lausanne                               | Switzerland                                                |
| Harrison, Mark               |                                                               | Borneo Nature Foundation and University of Leicester | United Kingdom of Great Britain and Northern Ireland (the) |
| HARRISS-WHITE, BARBARA       | Emeritus Professor of Development Studies                     | Oxford University                                    | United Kingdom of Great Britain and Northern Ireland (the) |
| Harrod, Ryan                 | Associate Professor of Anthropology                           | University of Alaska Anchorage                       | United States of America (the)                             |
| Harscoat-Schiavo, Christelle |                                                               | CNRS                                                 | France                                                     |
| Hart, Darren                 | CNRS Research Director, Biology.                              | CNRS                                                 | France                                                     |
| Hart, Stephen                | Professor of Ecology                                          | University of California Merced                      | United States of America (the)                             |
| Hart, Emma                   | Zoologist/PhD Candidate                                       | University College Dublin                            | Ireland                                                    |
| Hart, Alex                   | Postdoctoral Research Scholar                                 | Uppsala University                                   | Sweden                                                     |
| Hart-Davis, Adam             | Chemistry                                                     | Dr                                                   | United Kingdom of Great Britain and Northern Ireland (the) |
| Harte, Mary                  | botanical consultant                                          |                                                      | United States of America (the)                             |
| Harte, John                  | Professor of Ecosystem Sciences                               | University of California, Berkeley                   | United States of America (the)                             |
| Hartebrodt, Lena             | PhD student, Marine Science                                   | University of Auckland                               | New Zealand                                                |
| Hartke, Tamara               | Animal Ecology                                                | University of Göttingen                              | Germany                                                    |
| Härtl, Fabian                | Associate Researcher                                          | Technical University of Munich                       | Germany                                                    |
| Hartley, Jesse               | Masters student in Microbiology                               | University of Pretoria                               | South Africa                                               |
| Hartling, Corinna            | PhD student in human neuroscience                             | Charité Universitätsmedizin Berlin                   | Germany                                                    |
| hartmann, catherine          | ingenior                                                      | institut de recherche pour le developpement IRD      | France                                                     |
| Hartmann, Heidi              | Program Manager - Land Resources and Energy Policy            | Argonne National Laboratory                          | United States of America (the)                             |
| Hartmann, Johannes           | Physician, MD                                                 |                                                      | Germany                                                    |
| Hartmann, Andreas            | Junior-Professor in Hydrological Modeling and Water Resources | University of Freiburg                               | Germany                                                    |
| Hartmann, Marcus             | Project Group Leader                                          | Max Planck Institute for Developmental Biology       | Germany                                                    |
| Hartmann, Hanna              | Disturbance Ecology                                           | University of Bayreuth                               | Germany                                                    |
| Hartmann, Dennis             | Professor of Atmospheric Sciences                             | University of Washington Seattle                     | United States of America (the)                             |
| Hartmann, Kai                | Researcher Paleoclimatology                                   | Dept. for Geosciences Freie Universitaet Berlin      | Germany                                                    |
| Hartshorne, Joshua           | Assistant Professor of Cognitive Science                      | Boston College                                       | United States of America (the)                             |
| Hartung, Cynthia             | Professor of Psychology                                       | University of Wyoming                                | United States of America (the)                             |
| Harvey, Violet               | PhD student in astrophysics                                   | The University of Adelaide                           | Australia                                                  |
| Harvey, Eric                 | Assistant Professor - Ecology                                 | University of Montreal                               | Canada                                                     |
| Harvey, Naomi                | Research fellow - Zoology                                     | The University of Nottingham                         | United Kingdom of Great Britain and Northern Ireland (the) |

|                           |                                                                        |                                                                                                                                |                                                            |
|---------------------------|------------------------------------------------------------------------|--------------------------------------------------------------------------------------------------------------------------------|------------------------------------------------------------|
| Harvey, Jeffrey           | Professor and Senior Scientist                                         | Netherlands Institute of Ecology                                                                                               | Netherlands (the)                                          |
| Harwatt, Helen            | Research Fellow                                                        | Harvard Law School                                                                                                             | United States of America (the)                             |
| Harwell, Hugh             | Retired Ecologist & Natural History Resource Management Program Leader | Formerly Bureau of Land Management, Federal Committee on Ecological Reserves & Man And The Biosphere North America Directorate | United States of America (the)                             |
| Hashim, Syafiqah          |                                                                        | University Malaysia of Terengganu                                                                                              | Malaysia                                                   |
| Haskett, Jonathan         | Soil Science                                                           |                                                                                                                                | United States of America (the)                             |
| Hassanin, Alexandre       | Evolution                                                              | Sorbonne Université / Muséum national d'Histoire naturelle                                                                     | France                                                     |
| Hassellöv, Ida-Maja       | Associate professor Maritime environmental science                     | Chalmers University of Technology                                                                                              | Sweden                                                     |
| Hasselwander, Marc        | Civil Engineering                                                      | University of Coimbra                                                                                                          | Portugal                                                   |
| Hassenrück, Christiane    | Postdoc                                                                | Leibniz Centre for Tropical Marine Research                                                                                    | Germany                                                    |
| Hassinger, Denise         | Marine Conservation                                                    | EPA                                                                                                                            | United States of America (the)                             |
| Hastings, Philip          | Professor                                                              | Scripps Institution of Oceanography                                                                                            | United States of America (the)                             |
| Haswell, Peter            | Wildlife Biologist                                                     | Bangor University                                                                                                              | United Kingdom of Great Britain and Northern Ireland (the) |
| Haswell, Melissa          | Environmental Health                                                   | Queensland University of Technology                                                                                            | Australia                                                  |
| Hatch, Walter             | Professor of Biology Emeritus                                          | St Mary's College of Maryland                                                                                                  | United States of America (the)                             |
| Hatjina, Fani             | Seniour Researcher                                                     | Division of Apiculture- H.A.O. "DEMETER"                                                                                       | Greece                                                     |
| Haubrich, Kevin           | PhD student in Structural Biology                                      | European Molecular Biology Laboratory (EMBL)                                                                                   | Germany                                                    |
| Haubrock, Phillip Joschka | PostDoc                                                                | Senckenberg Research Institute and Natural History Museum Frankfurt                                                            | Germany                                                    |
| Hauck, Stefanie           | MS in Sustainability Candidate                                         | Chatham University                                                                                                             | United States of America (the)                             |
| Haudry, Annabelle         | Associate Professor                                                    | University of Lyon1                                                                                                            | France                                                     |
| Hauenstein, Christian     | Research Associate                                                     | Technische Universität Berlin                                                                                                  | Germany                                                    |
| Haugen, Thrond            | Professor                                                              | Norwegian University for Life Sciences                                                                                         | Norway                                                     |
| Hauke, Ronja              | MSc Student in Marine Biology                                          | Victoria University of Wellington                                                                                              | New Zealand                                                |
| Haupt, Heiko              | Biologist                                                              | Federal Agency for Nature Conservation                                                                                         | Germany                                                    |
| Hauptmann, Demian         | PhD Student                                                            |                                                                                                                                | Sweden                                                     |
| Hauray, Maxime            | Associate professor, Mathematics                                       | Aix-Marseille University                                                                                                       | France                                                     |
| Hausmann, Niklas          | Environmental Archaeology                                              | University of York                                                                                                             | United Kingdom of Great Britain and Northern Ireland (the) |
| Hausser, Jacques          | emeritus professor, ecology and evolution                              | University of Lausanne                                                                                                         | Switzerland                                                |
| Hautier, Lionel           | Researcher in Evolutionary Biology                                     | Centre National de la Recherche Scientifique (CNRS)                                                                            | France                                                     |
| Haux, Johannes            | PhD Candidate in Computer Vision                                       | Heidelberg University                                                                                                          | Germany                                                    |
| Haveman, Rense            | Ecologist                                                              | Dutch Ministry of the Interior                                                                                                 | Netherlands (the)                                          |
| Havenga, Minette          | PhD candidate                                                          | University of Pretoria, Genetics department                                                                                    | South Africa                                               |
| Haverkamp, Alexander      | Entomology                                                             | Wageningen University                                                                                                          | Netherlands (the)                                          |
| Havord, Peter             | Petroleum Geologist                                                    | Consultant                                                                                                                     | Australia                                                  |
| Hawkes, William           | PhD student in insect migration                                        | University of Exeter                                                                                                           | United Kingdom of Great Britain and Northern Ireland (the) |

|                      |                                                                 |                                                         |                                                            |
|----------------------|-----------------------------------------------------------------|---------------------------------------------------------|------------------------------------------------------------|
| Hawkins, Heidi-Jayne | Director of Research; and Hon. Research Associate               | Conservation South Africa; and University of Cape Town  | South Africa                                               |
| Haws, Cindy          | Wildlife Biologist                                              | Umpqua Community College                                | United States of America (the)                             |
| Hay, Alistair        | Botany                                                          | Royal Botanic Gardens Sydney                            | Australia                                                  |
| Hayat, Claude        | Professor Mathematics                                           | Universite Toulouse III IMT                             | France                                                     |
| Hayden, Sue          | wildlife management and data analytics                          |                                                         | United States of America (the)                             |
| Hayden, Anders       | Associate Professor, Political Science (Environmental Politics) | Dalhousie University                                    | Canada                                                     |
| Hayden, Mark         | MD, Paediatric Intensive Care                                   | Great Ormond St Hospital, London                        | United Kingdom of Great Britain and Northern Ireland (the) |
| Haydon, Trent        | PhD Candidate, Marine Biology                                   | University of Technology Sydney, Climate Change Cluster | Australia                                                  |
| Hayes, Chuck         | Wildlife Biologist                                              |                                                         | United States of America (the)                             |
| Hayes, John          | Associate Professor of Geography                                | Salem State University                                  | United States of America (the)                             |
| Hayes, Floyd         | Professor of Biology, Zoologist                                 | Pacific Union College                                   | United States of America (the)                             |
| Hayes, Kenneth       | Professor of Physics                                            | Hillsdale College                                       | United States of America (the)                             |
| Hayes, Loren         | Associate Professor                                             | University of Tennessee at Chattanooga                  | United States of America (the)                             |
| Hayes, William       | Professor of Biology                                            | Loma Linda University                                   | United States of America (the)                             |
| Hays, Michelle       | PhD candidate                                                   |                                                         | United States of America (the)                             |
| Hayward, David       | Visitor                                                         | Australian National University                          | Australia                                                  |
| Hayward, Nathan      | Research Scientist - Geophysics                                 | Geological Survey of Canada                             | Canada                                                     |
| Hayward, Matt        | Associate Professor of Conservation Biology                     | University of Newcastle                                 | Australia                                                  |
| Hayward, Angela      | Researcher                                                      | Angela Hayward                                          | United Kingdom of Great Britain and Northern Ireland (the) |
| Hayward, Alice       | Plant molecular biologist                                       | The University of Queensland                            | Australia                                                  |
| Hayward, Kristen     | Conservation Genomics                                           | Queen's University                                      | Canada                                                     |
| Haywood, Julia       | PhD Researcher                                                  | University of Exeter - Biosciences                      | United Kingdom of Great Britain and Northern Ireland (the) |
| Hazard, Christina    | Researcher/Soil microbial ecology                               | University of Lyon                                      | France                                                     |
| Hazel, Julia         | Adjunct Research Fellow                                         | James Cook University                                   | Australia                                                  |
| He, Peng             | PhD candidate in Animal Behavior                                | Max Planck Institute of Animal Behavior                 | Germany                                                    |
| Head, Josephine      | Senior Researcher                                               | Earthwatch Europe                                       | United Kingdom of Great Britain and Northern Ireland (the) |
| Healey, Michael      | Professor emeritus (ecology/environmental science)              | University of British Columbia                          | Canada                                                     |
| Heames, Brennen      | Evolutionary Biologist                                          | Institute for Evolution and Biodiversity                | Germany                                                    |
| Heaney, Lawrence     | Curator of Mammals                                              | Field Museum of Natural History                         | United States of America (the)                             |
| Heap, John           | Associate Professor                                             | University of Nottingham                                | United Kingdom of Great Britain and Northern Ireland (the) |
| Hearn, Alex          | Professor of Marine Biology                                     | Universidad San Francisco de Quito                      | Ecuador                                                    |
| Heath, Martin        | MSc, Director, Energy Services                                  | Basingstoke Energy Services Co-operative                | United Kingdom of Great Britain and Northern Ireland (the) |
| Heather, Freddie     | PhD Student                                                     | Institute for Marine and Antarctic Studies              | Australia                                                  |

|                       |                                                        |                                                                                         |                                                            |
|-----------------------|--------------------------------------------------------|-----------------------------------------------------------------------------------------|------------------------------------------------------------|
| Heatwole, Harold      | Adjunct Professor/Herpetologist                        | The University of New England                                                           | Australia                                                  |
| Heaver, Joseph        | Veterinarian                                           | Zoological Society of London                                                            | United Kingdom of Great Britain and Northern Ireland (the) |
| Hebdon, Chris         | Environmental Anthropology                             | Yale University                                                                         | United States of America (the)                             |
| Hébert, Marie-Pier    | PhD researcher                                         | McGill University                                                                       | Canada                                                     |
| Heck, Stephen         | PhD Candidate in Marine Ecology & Research Assistant   | Stony Brook University                                                                  | United States of America (the)                             |
| Heckel, Gisela        | Professor/Biology-Marine Mammalogy                     | Centro de Investigacion Cientifica y de Educacion Superior de Ensenada, Baja California | Mexico                                                     |
| Heckelman, Amber      | Researcher/Consultant, Food Systems                    | University of British Columbia                                                          | Canada                                                     |
| heckendorn, katrina   | PhD student                                            | Rhodes University                                                                       | United States of America (the)                             |
| Heckenroth, Alma      | PhD in Ecology                                         | Aix-Marseille Université, Université de Bretagne Occidentale                            | France                                                     |
| Heckmann, Ilja        | Biologist                                              | Leibniz Institute for Zoo and Wildlife Research (IZW)                                   | Germany                                                    |
| Heckmann, Tobias      | Senior Lecturer in Physical Geography                  | Cath. University of Eichstaett-Ingolstadt                                               | Germany                                                    |
| Heckötter, Julian     | Physics                                                | TU Dortmund University, Experimentelle Physik 2a                                        | Germany                                                    |
| Hecox-Lea, Bette      | Research Associate                                     | Marine Biological Laboratory                                                            | United States of America (the)                             |
| Hector, Basile        | Researcher, hydrology                                  | IRD                                                                                     | France                                                     |
| HEDDE, Mickael        | Researcher                                             | French National Institute for Agronomy                                                  | France                                                     |
| Hedeler, Barbara      |                                                        | Chalmers University of Technology                                                       | Sweden                                                     |
| Hedger, Katherine     |                                                        | University of Exeter                                                                    | United Kingdom of Great Britain and Northern Ireland (the) |
| Heeb, Luca            | Climate Change Manager                                 | CAB International                                                                       | Switzerland                                                |
| Heeb, Philipp         | Research Director                                      | CNRS / UPS                                                                              | France                                                     |
| Heer, Loreno          | Mathematics                                            | University of Zurich                                                                    | Switzerland                                                |
| Heeren, Paul          | PHD student                                            | Center for Astronomy (ZAH) Heidelberg                                                   | Germany                                                    |
| Heeren, Alexandre     | Research Professor of Cognitive and Affective Sciences | UCLouvain                                                                               | Belgium                                                    |
| Heesch, Svenja        | Phycology                                              | University of Rostock                                                                   | Germany                                                    |
| Hefner, Dorothee      | Post-doctoral Researcher / Communications              | Hanover University of Music, Drama, and Media                                           | Germany                                                    |
| Hegarty, Bridget      | postdoctoral fellow (environmental engineering)        | University of Michigan                                                                  | United States of America (the)                             |
| Hege, Hans-Christian  | Head of Department Visual Data Analysis                | Zuse Institute Berlin (ZIB)                                                             | Germany                                                    |
| Hegemann, Paul        | Medicine                                               | Gemeinschaftspraxis Dres.Hegemann/Franck                                                | Germany                                                    |
| Hegemann, Ingeborg    | Adjunct Professor, Wetland Ecology                     | University of MA/Lowell                                                                 | United States of America (the)                             |
| Heggie-Gracie, Samuel | Environmental Science Consultant                       | Tonkin & Taylor Ltd.                                                                    | New Zealand                                                |
| Heiberger, Lukas      | PhD student                                            | DRFZ                                                                                    | Germany                                                    |
| Heid, Joern           | Informatics                                            | University of Heidelberg                                                                | Germany                                                    |
| Heidemann, Knut       | Research Group Leader                                  | Max Planck Institute for Dynamics and Self-Organization                                 | Germany                                                    |
| Heiden, Gustavo       | Researcher                                             | Embrapa Clima Temperado                                                                 | Brazil                                                     |
| Heidenreich, Uwe      | Biology                                                | Universität Lüneburg                                                                    | Germany                                                    |
| Heidenreich, Marie    | Head of SynCom Office                                  | Helmholtz Earth and Environment                                                         | Germany                                                    |
| Heider, Katharin      | PhD student/ Earth system science                      | Universität Hamburg                                                                     | Germany                                                    |

|                            |                                                               |                                                                         |                                |
|----------------------------|---------------------------------------------------------------|-------------------------------------------------------------------------|--------------------------------|
| Heiderich, Joleen          | PhD Candidate in Physical Oceanography                        | MIT/WHOI Joint Program                                                  | United States of America (the) |
| Heighton, Sean             | PhD student                                                   | Université Paul Sabatier Toulouse III                                   | France                         |
| Heijenk, Geert             | Professor Wireless Networks & Mobility                        | University of Twente                                                    | Netherlands (the)              |
| Heiland, Stefan            | Professor, Landscape Planning and Development                 | Technische Universität Berlin                                           | Germany                        |
| Heiling, Jacob             | Research biologist - Ecology and pollination biology          | Florida State University                                                | United States of America (the) |
| Heilmann, Zeno             | Geophysicist                                                  | CRS4                                                                    | Italy                          |
| Hein, Yannik               | PhD Physics/Biophysics                                        | PTB                                                                     | Germany                        |
| Heindler, Franz Maximilian | PhD candidate                                                 | KU Leuven                                                               | Belgium                        |
| Heinen, Robin              | PhD Candidate                                                 | Netherlands Institute of Ecology (NIOO-KNAW)                            | Netherlands (the)              |
| Heinicke, Stefanie         |                                                               | Max Planck Institute for Evolutionary Anthropology                      | Germany                        |
| Heinrich, Luise            | Department of Physics and Earth Sciences                      | Jacobs University Bremen                                                | Germany                        |
| Heinrichs-Caldas, Waldir   | PhD Candidate                                                 | INPA                                                                    | Brazil                         |
| Heintz-Buschart, Anna      | Postdoctoral Researcher in Microbial Ecology                  | Helmholtz Centre for Environmental Research GmbH - UFZ                  | Germany                        |
| Heinze, Alan               | Production Ecology and Resource Conservation                  | Wageningen UR                                                           | Mexico                         |
| Heise, Christian           | Physician in advanced training, Medicine                      | Martin-Luther-University Halle-Wittenberg                               | Germany                        |
| Heisey, Steven             | Soil Microbiologist                                           | Graduate Student                                                        | United States of America (the) |
| Heisig, Marco              | Scientific Assistant in Computational Engineering             | FAU Erlangen-Nürnberg                                                   | Germany                        |
| Heiss, Georg               | Lecturer/Researcher                                           | Freie Universität Berlin, Dept. of Geosciences                          | Germany                        |
| heitkonig, ignaa           | asst prof, ecology                                            | wageningen university                                                   | Netherlands (the)              |
| Helbach, Jan               | Geoecologist                                                  | Geobotany, University Freiburg                                          | Germany                        |
| Held, Jenny                | PhD, Physics                                                  | ETH Zürich                                                              | Switzerland                    |
| Heleno, Ruben              | Principal investigator Ecology                                | University of Coimbra                                                   | Portugal                       |
| Helfer, Kevin              | PhD Candidate                                                 | Delft University of Technology                                          | Netherlands (the)              |
| Helgen, Kristofer M.       | Professor of Biological Sciences                              | University of Adelaide                                                  | Australia                      |
| Helgert, Sebastian         | PhD                                                           |                                                                         | Germany                        |
| Hellemans, Simon           | PhD, F.R.S.-FNRS Research Fellow                              | Evolutionary Biology & Ecology, Université libre de Bruxelles           | Belgium                        |
| Hellén, Marianna           | Graduate Student/Neurosciences                                | University of Helsinki                                                  | Finland                        |
| Hellequin, Eve             | PhD                                                           |                                                                         | France                         |
| Heller, Johannes           | Research and Teaching Assistant                               | Chair of Operations Management, University of Bayreuth                  | Germany                        |
| Heller, Jens               | Project Scientist, Environmental Genomics and Systems Biology | Lawrence Berkeley National Lab                                          | United States of America (the) |
| Heller, Nicole             | Ecologist, Curator                                            | Carnegie Museum of Natural History                                      | United States of America (the) |
| Heller, Richard Scott      | Research Scientist                                            | Hagedorn Research Institute                                             | Portugal                       |
| Helleu, Quentin            | Postdoctoral fellow                                           | University of Lausanne                                                  | Switzerland                    |
| Hellmann, Fernando         | Professor at Department of Public Health                      | Universidade Federal de Santa Catarina                                  | Brazil                         |
| Hellquist, C. Eric         | Associate Professor of Biological Sciences (Ecology)          | State University of New York Oswego                                     | United States of America (the) |
| Hellwig, Niels             | Postdoc / Environmental Science                               | Institute of Environmental Science and Geography, University of Potsdam | Germany                        |
| Helm, Barbara              | Professor of Biological Rhythms                               | University of Groningen                                                 | Netherlands (the)              |



|                                 |                                                             |                                                                                |                                                            |
|---------------------------------|-------------------------------------------------------------|--------------------------------------------------------------------------------|------------------------------------------------------------|
| Helm, Aveliina                  | Senior researcher in ecology                                | University of Tartu                                                            | Estonia                                                    |
| Helmns, Dre                     | Mechanical Engineering                                      | UC Berkeley                                                                    | United States of America (the)                             |
| Helmstädter, Martin             | Biology                                                     | University of Freiburg                                                         | Germany                                                    |
| Helsens, Nicolas                | PhD Student, Microbiology                                   | INRA                                                                           | France                                                     |
| Hemami, Mahmoud-Reza            | Associate professor of conservation ecology                 | Isfahan University of Technology                                               | Iran (Islamic Republic of)                                 |
| Hemery, Youna                   | Research scientist in Nutrition                             | Institute of Research for Development                                          | France                                                     |
| Heming, Neander                 | Post Doc                                                    | Universidade Estadual de Santa Cruz                                            | Brazil                                                     |
| Hemkemeyer, Michael             | Scientific staff / Soil biology                             | Rhine-Waal University of Applied Sciences                                      | Germany                                                    |
| Hemmendinger, David             | professor emeritus of computer science                      | Union College                                                                  | United States of America (the)                             |
| Hemmer, Ingrid                  | Professor, Geography EDUCATION                              | Cath. Universität Eichstätt                                                    | Germany                                                    |
| Hemming, Michael                | Oceanographic researcher                                    | University of New South Wales                                                  | Australia                                                  |
| Hemptinne, Jean-Louis           | Professor of Ecology                                        | Université Fédérale Toulouse Midi-Pyrénées                                     | France                                                     |
| Hemsley, Victoria               | Oceanography postdoc                                        | Queen Mary university of London                                                | United Kingdom of Great Britain and Northern Ireland (the) |
| Henault-Brunet, Vincent         | Assistant Professor of Astronomy                            | Saint Mary's University, Halifax                                               | Canada                                                     |
| Henckel, Laura                  | Contractual researcher in ecology                           | Swedish University of Agricultural Science                                     | Sweden                                                     |
| Hendawy, Mennatullah            | urban planning                                              | TU Berlin                                                                      | Germany                                                    |
| Hendel, Anna-Lena               | PhD candidate/ Wildlife Ecology                             | University Freiburg                                                            | Germany                                                    |
| Henderson, Deanna               | Zoology                                                     | Minibeast Wildlife Trust                                                       | Australia                                                  |
| Henderson, Lesley               | Invasive plants                                             | Agricultural Research Council                                                  | South Africa                                               |
| Henderson, Alan                 | Wildlife Manager                                            | Minibeast Wildlife                                                             | Australia                                                  |
| Henderson, Wayne                | Full Lecturer Geological Sciences                           | California State University Fullerton                                          | United States of America (the)                             |
| Henderson, Amanda               | DOE Watershed Function Scientific Focus Area, Field Manager | Rocky Mountain Biological Laboratory                                           | United States of America (the)                             |
| Henderson, Laura                | Education for Sustainable Development                       | Charles University Environment Centre                                          | Czech Republic (the)                                       |
| Hendler, Gordon                 | Curator                                                     | Natural History Museum of Los Angeles County                                   | United States of America (the)                             |
| Hendlin, Yogi                   | Environmental Philosopher and Public Health Scientist       | Erasmus University Rotterdam and University of California San Francisco        | Netherlands (the)                                          |
| Hendrickson, Andy               | Clinical Pharmacist                                         |                                                                                | United States of America (the)                             |
| Hendrickx, Jan                  | Professor Emeritus of Hydrology                             | New Mexico Tech                                                                | United States of America (the)                             |
| Hendrickx, Frederik             | Senior scientist                                            | Royal Belgian Institute of Natural Sciences                                    | Belgium                                                    |
| Hener, Claudia                  | PhD student in plant biology                                | University of Tübingen                                                         | Germany                                                    |
| Henkanaththegedara, Sujana      | Associate Professor of Biology                              | Longwood University                                                            | United States of America (the)                             |
| Henke, Jans                     | PhD student                                                 |                                                                                | Netherlands (the)                                          |
| Henke-von der Malsburg, Johanna | PhD Candidate Behavioral Biology                            | German Primate Center (Leibniz Institute) & Georg-August-Universität Göttingen | Germany                                                    |
| Henley, Sian                    | Lecturer in Marine Science                                  | University of Edinburgh                                                        | United Kingdom of Great Britain and Northern Ireland (the) |
| Hennebelle, Patrick             | astrophysics                                                | CEA                                                                            | France                                                     |
| Hennequin, Sabine               | Assistant Professor/Botany                                  | Sorbonne Université                                                            | France                                                     |
| Hennesse, Thomas                | PhD                                                         |                                                                                | Belgium                                                    |
| Hennessey, Kelly                | Biology Teaching Associate, PhD                             | University of Washington                                                       | United States of America (the)                             |

|                                   |                                                        |                                                                       |                                                            |
|-----------------------------------|--------------------------------------------------------|-----------------------------------------------------------------------|------------------------------------------------------------|
| Hennig, Benjamin                  | Professor of Geography                                 | University of Iceland                                                 | Iceland                                                    |
| Hennig, Joerg                     | Senior Lecturer                                        | University of Otago                                                   | New Zealand                                                |
| Hennig, Wolfgang                  | Chemist (PhD)                                          | GAP Gesellschaft fuer Alternativ-Energie-Projekte e.V.                | Germany                                                    |
| Hennig, Wolfgang                  | Professor of Genetics                                  | Johannes Gutenberg University Mainz                                   | Germany                                                    |
| Henniger, Hans                    | Researcher in Forest Modelling                         | Helmholtz-Centre for Environmental Research                           | Germany                                                    |
| Hennion, Françoise                | Researcher in Ecology                                  | CNRS                                                                  | France                                                     |
| Henrique de Frias Castro, Gustavo | Professor / Feed Analyses - Equine                     | Federal University of Jequitinhonha and Mucuri Valleys                | Brazil                                                     |
| Henriques, Sergio                 | Chair of the IUCN Spider and Scorpion Specialist Group | Zoological Society London                                             | United Kingdom of Great Britain and Northern Ireland (the) |
| Henry, Gregory                    | Professor                                              | University of British Columbia                                        | Canada                                                     |
| Henry, Asegun                     | Associate Professor                                    | Massachusetts Institute of Technology                                 | United States of America (the)                             |
| Henry, Dominic                    | Ecologist                                              | University of Cape Town                                               | South Africa                                               |
| Henschell, Max                    | Research Scientist/Ecologist                           | New York Natural Heritage Program                                     | United States of America (the)                             |
| Hensgens, Geert                   | Postdoctoral researcher, Earth and Climate             | Vrije Universiteit Amsterdam                                          | Netherlands (the)                                          |
| Hensoldt, Agnieszka               | associate professor; social philosophy                 | University of Opole                                                   | Poland                                                     |
| Hepner, Elizabeth                 | Veterinarian                                           | Virginia Maryland College of Veterinary Medicine                      | United States of America (the)                             |
| Hérault, Bruno                    | Senior Scientist                                       | Cirad                                                                 | France                                                     |
| Herbeck, Johannes                 | Senior Researcher, Human Geography                     | Sustainability Research Center (artec), University of Bremen          | Germany                                                    |
| Herbert, Betsy                    | Forest management/environmental studies                | Freelance writer                                                      | United States of America (the)                             |
| Herbert, David                    | Honorary Professor - Malacology                        | University of KwaZulu-Natal                                           | South Africa                                               |
| Herbert, Robin                    | PhD Student Plant Biology                              | UC Berkeley                                                           | United States of America (the)                             |
| Herbert, Horst                    | Phd Student Bioatomic 3d Printing                      | Leuphana University Lueneburg                                         | Germany                                                    |
| Herbstritt, Barbara               | Hydrologist                                            | University                                                            | Germany                                                    |
| Hercot, David                     | Public Health Specialist, Advisor                      | Ministry of Welfare, Health and Environment, Brussels Region, Belgium | Belgium                                                    |
| Heredia, Eduardo                  | Physics                                                | CITEDEF                                                               | Argentina                                                  |
| Heres, Melissa                    | Waterfront Assistant                                   | The School for Field Studies                                          | Turks and Caicos Islands (the)                             |
| Hergoualc'h, Kristell             | Scientist                                              | Center for International Forestry Research (CIFOR)                    | Peru                                                       |
| Hering, Jenny                     | PhD student Biochemistry                               | Gothenburg University                                                 | Sweden                                                     |
| Hering, Fabio                     | MSc Geoscience                                         |                                                                       | Germany                                                    |
| Heringer, Gustavo                 | Post-doctoral researcher - Applied Ecology             | Universidade Federal de Lavras (UFLA)                                 | Brazil                                                     |
| Herman, Ivan                      | Senior Researcher, Computer Scientist                  |                                                                       | Netherlands (the)                                          |
| Herman, Jean-Paul                 | Neurobiology                                           | CNRS                                                                  | France                                                     |
| Herman, Ph.D., Maryann            | Associate Professor of Biology                         | St. John Fisher College                                               | United States of America (the)                             |
| Hermann, Julia-Maria              | Associate Researcher                                   | Chair of Restoration Ecology, Munich University of Technology         | Germany                                                    |
| Hermann, Sharon                   | Ecologist                                              | Auburn University                                                     | United States of America (the)                             |
| Herminghaus, Stephan              | Physicist, Professor, Director                         | Max Planck Institute for Dynamics and Self-Organization, Göttingen    | Germany                                                    |
| Hernandez, Karina                 | Biologist                                              | Ecuador Ministry of Environment                                       | Ecuador                                                    |

|                                |                                                                 |                                                                            |                                                            |
|--------------------------------|-----------------------------------------------------------------|----------------------------------------------------------------------------|------------------------------------------------------------|
| Hernandez, Jose M.             | Particle physicist                                              | CIEMAT                                                                     | Spain                                                      |
| Hernandez, Isis                | licenciada en gestión y evaluacion ambiental                    | UBV                                                                        | Venezuela (Bolivarian Republic of)                         |
| Hernandez, Dana                | PhD Student in Environmental Engineering                        | UC Berkeley                                                                | United States of America (the)                             |
| HERNANDEZ, Lionel              | Retired professor, Forest ecology                               | Univarsidad Nacional Experimental de Guayana                               | Venezuela (Bolivarian Republic of)                         |
| Hernández, Laura               | Postdoc researcher                                              | INIA-CIFOR                                                                 | Spain                                                      |
| Hernandez Doring, Xavier       | Astrophysics                                                    | Instituto de Astronomia UNAM                                               | Mexico                                                     |
| Hernandez Lucas, Simon         | Master of Science in Biology                                    |                                                                            | Belgium                                                    |
| Hernández Plaza, María Eva     |                                                                 | Institute for Sustainable Agriculture. Spanish National Resarch Council    | Spain                                                      |
| Hernandez Santin, Lorna        | Postdoctoral Research Fellow                                    | Centre for Mined Land Rehabilitation, University of Queensland             | Australia                                                  |
| Hernández Vázquez, Andrea      | Bióloga                                                         | UNAM                                                                       | Mexico                                                     |
| Hernandez-Lozano, Misha        | PhD student                                                     | UNAM                                                                       | Mexico                                                     |
| Hernández-Manrique, Olga Lucía | Head Social Science and Biodiversity Knowledge Program          | Alexander von Humboldt Biological Resources Research Institute             | Colombia                                                   |
| Hernández-Sandoval, Luis       | Botany Professor                                                | Facultad de Ciencias Naturales, Universidad Autónoma de Querétaro          | Mexico                                                     |
| Hernandez-Santana, Virginia    |                                                                 | IRNAS-CSIC                                                                 | Spain                                                      |
| Hernandez-Serna, Andres        | Senior Faculty Specialist                                       | University of Maryland                                                     | United States of America (the)                             |
| Hernández-Trejo, Esmeralda     | Ciencia Forense                                                 | Universidad Nacional Autónoma de México                                    | Mexico                                                     |
| Hervann, Pierre-Yves           | PhD Marine Ecology                                              | IFREMER / AGROCAMPUS OUEST                                                 | France                                                     |
| Herpell, Johannes              | Microbiologist                                                  | University of Vienna                                                       | Austria                                                    |
| Herrando, Sergi                | Population ecology                                              | Catalan Ornithological Institute / CREAF                                   | Spain                                                      |
| Herranz Barrera, Jesus         | Profesor Contratado Doctor                                      | Universidad Autónoma de Madrid                                             | Spain                                                      |
| Herremans, Marc                | Research Director                                               | Natuurpunt (nature conservation ngo)                                       | Belgium                                                    |
| Herrera, Cayetano              | PhD Student                                                     | University of the Balearic Islands                                         | Spain                                                      |
| Herrera, Santiago              | Deep-Sea Biologist                                              | Lehigh University                                                          | United States of America (the)                             |
| Herrera, Mercedes              | Researcher, fish biology and ecology                            | University of Córdoba (Spain)                                              | Spain                                                      |
| Herrera, Cinthya N.            | Astronomía, postdoc                                             | IRAM                                                                       | France                                                     |
| Herrera, Jose                  | Research staff - Physics                                        | Universidad de Los Andes                                                   | Venezuela (Bolivarian Republic of)                         |
| Herrera Paredes, Sur           | Postdoctoral fellow, Computational Biology                      | Stanford University                                                        | Mexico                                                     |
| Herrero, Mario                 | Chief Research Scientist                                        | CSIRO                                                                      | Australia                                                  |
| Herrero, Asier                 | Researcher: Forest Ecology                                      | University of Alcala                                                       | Spain                                                      |
| HERRERO, MARTA                 | PHD STUDENT                                                     | INSTITUTE FOR GAME AND WILDLIFE RESEARCH                                   | Spain                                                      |
| Herrett, Scott                 | Environmental social researcher                                 | The James Hutton Institute                                                 | United Kingdom of Great Britain and Northern Ireland (the) |
| Herrmann, Maximilian           | PhD student/Environmental physics                               | IWR, Heidelberg University                                                 | Germany                                                    |
| Herrmann, Kathrin              | Veterinary Specialist in Animal Welfare Science, Ethics and Law | Johns Hopkins Bloomberg School of Public Health                            | United States of America (the)                             |
| Herrmann, Pauline              | Senior Scientist for Psychotherapy Research                     | University of Klagenfurt                                                   | Austria                                                    |
| Herron, Darryl                 | PhD Candidate - Forest Pathologist                              | Forestry and Agricultural Biotechnology Institute - University of Pretoria | South Africa                                               |

|                             |                                                     |                                                                            |                                                            |
|-----------------------------|-----------------------------------------------------|----------------------------------------------------------------------------|------------------------------------------------------------|
| Herrón, Pilar               | Marine Biologist                                    | Fundación Ecomares                                                         | Colombia                                                   |
| Hersh, C. Mark              | Aquatic Biologist                                   |                                                                            | United States of America (the)                             |
| Herten, Andreas             | Scientific Researcher                               | Forschungszentrum Jülich                                                   | Germany                                                    |
| Hertweck, Christian         | Professor                                           | Leibniz Institute for Natural Product Research and Infection Biology (HKI) | Germany                                                    |
| Hervas, Guillermo           |                                                     | Museo Nacional de C Naturales                                              | Spain                                                      |
| Hervías-Parejo, Sandra      | Postdoctoral researcher                             | IMEDEA (UIB-CSIC)                                                          | Spain                                                      |
| Herzog, Laura Mae J.        | PostDoc / political science                         | Institute of Environmental Systems Research, University Osnabrück          | Germany                                                    |
| Herzog, Sebastian           | Scientific Director                                 | Asociación Armonía                                                         | Bolivia (Plurinational State of)                           |
| Herzon, Iryna               | adjunct professor                                   | University of Helsinki                                                     | Finland                                                    |
| Hes, Edwin                  | Lecturer in Environmental Systems Analysis          | IHE Delft Institute for Water Education                                    | Netherlands (the)                                          |
| Heslip, Tim                 |                                                     | Simon Fraser University                                                    | Canada                                                     |
| Hesse, Elze                 |                                                     | University of Exeter                                                       | United Kingdom of Great Britain and Northern Ireland (the) |
| Hestvik, Arild              | Associate professor                                 | University of Delaware                                                     | United States of America (the)                             |
| Hettwer Giehl, Eduardo Luis | Professor / Ecology                                 | Federal University of Santa Catarina                                       | Brazil                                                     |
| Hettyey, Attila             | researcher, life sciences                           | MTA ATK NÖVI                                                               | Hungary                                                    |
| Heuchel, Franz              | PhD student in Acoustical Engineering               | Technical University of Denmark                                            | Denmark                                                    |
| Heuertz, Myriam             | Research Scientist                                  | INRA                                                                       | France                                                     |
| Heurich, Marco              | Wildlife Ecology and Conservation Biology           | University of Freiburg                                                     | Germany                                                    |
| Heussler, Carina Desirée    | PhD cand.                                           | University of Innsbruck                                                    | Austria                                                    |
| Heuwinkel, Ludwig           | Teacher and Author                                  | Westfaalen-Kolleg Bielefeld                                                | Germany                                                    |
| Hewitt, Chad                | Professor and Director, Biosecurity Research Centre | Murdoch University                                                         | Australia                                                  |
| Hewitt, Lorraine            | Visiting Research Associate                         | Newcastle University                                                       | United Kingdom of Great Britain and Northern Ireland (the) |
| Heydenreich, Sven           | Postdoctoral researcher in Cosmology                | UC Santa Cruz                                                              | United States of America (the)                             |
| Heymann, Eckhard W.         | Senior researcher & Adjunt professor                | Deutsches Primatenzentrum - Leibniz-Institut für Primatenforschung         | Germany                                                    |
| Heymans, Nicole             | Retired Professor, Polymer Physics                  | Universite Libre de Bruxelles                                              | Belgium                                                    |
| Heynen, Jan                 | Physics Engineer (retired)                          | (na)                                                                       | Canada                                                     |
| hibit, joshua               | PhH candidate, dept. of Botany                      | University of Hawaii at Manoa                                              | United States of America (the)                             |
| Hicks, Klara                | Doctor                                              | Great Western Hospital                                                     | United Kingdom of Great Britain and Northern Ireland (the) |
| Hicks, Thurston             | Associate Professor                                 | University of Warsaw                                                       | United States of America (the)                             |
| Hicks, Thurston C           | Primatology                                         | University of Warsaw                                                       | Poland                                                     |
| Hidalgo, Max                | Jefe Departamento de Ictiología                     | Museo de Historia Natural UNMSM                                            | Peru                                                       |
| Hidalgo-Silva, Hugo         | Computer Science Researcher                         | CICESE                                                                     | Mexico                                                     |
| Hidrovo, Andrei             | Post doctoral researcher                            | CESAM, DAO, University of Aveiro                                           | Portugal                                                   |
| Hiebenthal, Claas           | Marine Ecology                                      | GEOMAR Helmholtz-Centre for Ocean Research Kiel                            | Germany                                                    |
| Hiebert, Laurel             | Postdoctoral Fellow                                 | Universidade de São Paulo                                                  | Brazil                                                     |
| Hielkema, Auke              | Independent biodiversity researcher                 |                                                                            | Suriname                                                   |

|                          |                                                                                    |                                                                 |                                                            |
|--------------------------|------------------------------------------------------------------------------------|-----------------------------------------------------------------|------------------------------------------------------------|
| Hietala-Henschell, Katie | Conservation Biologist                                                             | The Xerces Society                                              | United States of America (the)                             |
| Hietz, Peter             | Professor                                                                          | University of Natural Resources and Life Sciences               | Austria                                                    |
| Higgins, Tim             | Chemistry                                                                          | National University of Ireland Galway                           | Ireland                                                    |
| Higgins, Sandra          | Psychologist                                                                       | Go Vegan World                                                  | Ireland                                                    |
| Higgs, Nicholas          | Director                                                                           | Cape Eleuthera Institute                                        | Bahamas (the)                                              |
| Hijar, Martha            | Senior researcher                                                                  | Fundación Entornos AC                                           | Mexico                                                     |
| Hik, David               | Professor of Ecology                                                               | Simon Fraser University                                         | Canada                                                     |
| Hilaire, Samuel          | Research Technician                                                                | Tour du Valat - Research Institute                              | France                                                     |
| Hilberg, Laura           | Scientist                                                                          | EcoAdapt                                                        | United States of America (the)                             |
| Hilbrandt, Nicole        | Food Sciences                                                                      | Hochschule Weihenstephan-Triesdorf                              | Germany                                                    |
| Hildebrand, Peter        | Director, Earth Sciences, Emeritus                                                 | NASA Goddard Space Flight Center                                | United States of America (the)                             |
| Hildebrandt, Ximena      | PhD student                                                                        | University of Cologne                                           | Germany                                                    |
| Hilgen, Frits            | Associate Professor                                                                | Utrecht University                                              | Netherlands (the)                                          |
| Hill, Jon                | Senior Lecturer                                                                    | University of York                                              | United Kingdom of Great Britain and Northern Ireland (the) |
| Hill, Louise             | Scientific advisor on tree health                                                  | Department for the Environment, Food and Rural Affairs (UK)     | United Kingdom of Great Britain and Northern Ireland (the) |
| Hill, Trevor             | Geography                                                                          | University of KwaZulu-Natal                                     | South Africa                                               |
| Hill, Michael            | Emeritus Professor                                                                 | University of North Dakota                                      | Australia                                                  |
| Hill, Gregory            | Professor of Mathematics and Environmental Studies                                 | University of Portland                                          | United States of America (the)                             |
| Hill, Jaclyn             | Research Scientist                                                                 | Fisheries and Oceans Canada                                     | Canada                                                     |
| Hill, Tessa              | Professor, Earth & Planetary Sciences                                              | UC Davis                                                        | United States of America (the)                             |
| Hill Davidson, Susan     | Snr. Environmental Health Officer- Pollution Science, Occupational Safety & Health | Bermuda Government                                              | Bermuda                                                    |
| HILLAIRE-MARCEL, Claude  | Emeritus professor                                                                 | Université du Québec à Montréal                                 | Canada                                                     |
| Hiller, Christina        | Conservation Biologist                                                             |                                                                 | South Africa                                               |
| Hilliou, Frederique      | Research Engineer/ Bioinformatics                                                  | INRA                                                            | France                                                     |
| Hiltbrunner, Andreas     | Professor of Molecular Plant Physiology                                            | University of Freiburg                                          | Germany                                                    |
| Hilts, Angus             | PhD student in microbiology                                                        | University of Vienna                                            | Austria                                                    |
| Hiltunen, Markus         | PhD student of Biology                                                             | Uppsala University                                              | Sweden                                                     |
| Himes Boor, Gina         | Assistant Research Professor in Ecology                                            | Montana State University                                        | United States of America (the)                             |
| Hinckley, Arlo           | Evolutionary Biologist                                                             | Estación Biológica de Doñana-CSIC                               | Spain                                                      |
| Hines, Nancy             | Medical Technology/Zoology                                                         | Graduate of University of Illinois Retired                      | United States of America (the)                             |
| Hingamp, Pascal          | Life Scientist, Associate Professor                                                | Aix-Marseille Université                                        | France                                                     |
| Hingray, Benoit          | Researcher                                                                         | CNRS                                                            | France                                                     |
| Hinners, Jana            | Postdoc in Biology                                                                 | University of Edinburgh                                         | United Kingdom of Great Britain and Northern Ireland (the) |
| Hinojosa, Eduardo        | Environmental Scientist on Sustainable Development                                 | Universidad Iberoamericana de Puebla                            | Mexico                                                     |
| Hinrichs, Sandrine       | Master of Science student in Psychology                                            | Georg-August-University Goettingen                              | Germany                                                    |
| Hintze, Sara             | Postdoc in animal welfare science                                                  | University of Natural Resources and Life Sciences Vienna (BOKU) | Austria                                                    |
| hintzy, frederique       | phD ,                                                                              | université savoie mont-blanc                                    | France                                                     |

|                        |                                                                        |                                                                 |                                                            |
|------------------------|------------------------------------------------------------------------|-----------------------------------------------------------------|------------------------------------------------------------|
| Hinz, Hariet           | Director of CABI Switzerland                                           | CABI                                                            | Switzerland                                                |
| Hipólito, Dário        | Research fellow                                                        | Universidade de Aveiro                                          | Portugal                                                   |
| Hiraldó, Fernando      | Research Professor Emeritus                                            | Estación Biológica de Doñana CSIC                               | Spain                                                      |
| Hirasuna, Thomas       | Food Science & Technology (PhD), Registered Professional Engineer (NY) |                                                                 | United States of America (the)                             |
| Hirota, Marina         | Assistant Professor                                                    | Federal University of Santa Catarina                            | Brazil                                                     |
| Hirsch, Ann            | Distinguished Professor                                                | UCLA                                                            | United States of America (the)                             |
| Hirschinger, Julien    | PhD candidate Animal Health                                            | Ecole Nationale Vétérinaire de Toulouse                         | France                                                     |
| Hirschkind, Lynn       | Anthropology                                                           |                                                                 | Ecuador                                                    |
| Hirst, Catherine       | Postdoctoral Researcher                                                | Universite Catholique du Louvain                                | Belgium                                                    |
| Hita Garcia, Francisco | Staff Scientist                                                        | Okinawa Institute of Science and Technology Graduate University | Japan                                                      |
| Hively, Dean           | Physical Scientist                                                     | may not declare for this purpose                                | United States of America (the)                             |
| Hixon, Mark            | Hsiao Endowed Professor of Marine Biology                              | University of Hawaii                                            | United States of America (the)                             |
| Hloch, Sergej          | Senior researcher/research on waterjetting                             | Institute of Geonics of the CAS                                 | Czech Republic (the)                                       |
| Hlusko, Leslea         | Professor of Integrative Biology                                       | University of California Berkeley                               | United States of America (the)                             |
| Hmiel, Andrew          | Physicist, ASTM Member                                                 | Solar Light Co. Inc.                                            | United States of America (the)                             |
| HNIA, Karim            | Researcher                                                             | INSERM                                                          | France                                                     |
| Ho, Maureen            |                                                                        | Griffith University                                             | Australia                                                  |
| Ho, Ming-Jay           | Research Specialist                                                    | Biodiversity Research Center/ Academia Sinica                   | Taiwan                                                     |
| Hoareau, Yves          | Research Scientist in Conservation Biology                             | University of Washington                                        | United States of America (the)                             |
| Hoban, Sean            | Conservation Biology                                                   | The Morton Arboretum                                            | United States of America (the)                             |
| Hobbs, Jethro          | Postgraduate research student, upland vegetation ecology               | Durham University                                               | United Kingdom of Great Britain and Northern Ireland (the) |
| Hobern, Donald         | Biodiversity informatician                                             |                                                                 | Australia                                                  |
| Hobkirk, Elana         | Postgraduate researcher, Behavioural Ecology                           | Durham University                                               | United Kingdom of Great Britain and Northern Ireland (the) |
| Hocevar, Sara          | Marine biologist                                                       | University of Jyväskylä                                         | Finland                                                    |
| Höch, Rebekka          | PhD Candidate Evolutionary Developmental Biology                       | University of Konstanz                                          | Germany                                                    |
| Hochberg, Michael      | Research Director                                                      | Centre National de la Recherche Scientifique                    | France                                                     |
| Höche, Nils            | PhD Student in Geoscience                                              | Mainz University                                                | Germany                                                    |
| Hochkirch, Axel        | Associate Professor / Biodiversity                                     | Trier University                                                | Germany                                                    |
| Hock, Robert           | PhD, Cell- and Developmental Biology                                   | University of Würzburg                                          | Germany                                                    |
| Höckendorff, Stefanie  |                                                                        | University of Konstanz                                          | Germany                                                    |
| Hocking, Sophie        |                                                                        | Swansea University                                              | United Kingdom of Great Britain and Northern Ireland (the) |
| Hockings, Marc         | Emeritus Professor                                                     | University of Queensland                                        | Australia                                                  |
| Hódar, José A.         | Full Professor, Ecology                                                | University of Granada                                           | Spain                                                      |
| Hodgins, Nicola        | Marine Biologist                                                       | Whale and Dolphin Conservation                                  | United Kingdom of Great Britain and Northern Ireland (the) |
| Hodgson, Emma          | Postdoctoral Researcher, Ecology                                       | Simon Fraser University                                         | Canada                                                     |

|                       |                                                                 |                                                                               |                                                            |
|-----------------------|-----------------------------------------------------------------|-------------------------------------------------------------------------------|------------------------------------------------------------|
| Hodgson, Christopher  | Research Scientist in Entomology                                | National Museum of Wales                                                      | United Kingdom of Great Britain and Northern Ireland (the) |
| Hodgson, Dave         | Professor of Ecology                                            | University of Exeter                                                          | United Kingdom of Great Britain and Northern Ireland (the) |
| Hodson, Dan           | Research Scientist                                              | University of Reading                                                         | United Kingdom of Great Britain and Northern Ireland (the) |
| Hodum, Peter          | Associate Professor, Conservation Biology                       | University of Puget Sound                                                     | United States of America (the)                             |
| Hoechstetter, Karsten | Professor of Physics                                            | University for Applied Sciences Jena                                          | Germany                                                    |
| Hoek van Dijke, Anne  |                                                                 | Wageningen University                                                         | Netherlands (the)                                          |
| Hoekstra, Marieke     | Research Associate                                              | Imperial College                                                              | United Kingdom of Great Britain and Northern Ireland (the) |
| Hoekstra, Stephanie   | Professor, Climate Sciences                                     | Furman University                                                             | United States of America (the)                             |
| Hoelzel, Rus          | Professor                                                       | Durham University                                                             | United Kingdom of Great Britain and Northern Ireland (the) |
| Hoeppe, Peter         | Meteorologist                                                   | Munich Climate Insurance Initiative                                           | Germany                                                    |
| Hof, anouschka        | Assistant professor Ecology and nature Conservation             | Wageningen university                                                         | Netherlands (the)                                          |
| Hof, Christian        | Junior Research Group Leader; biodiversity science              | Technical University of Munich                                                | Germany                                                    |
| Hofer, Stefan         | Climate researcher                                              | University of Bristol                                                         | United Kingdom of Great Britain and Northern Ireland (the) |
| Hofer, Heribert       | Director, zoology, behavioural ecology, conservation of mammals | Leibniz Institute for Zoo & Wildlife Research                                 | Germany                                                    |
| Höfer, Hubert         | Head of Biosciences Department                                  | State Museum of Natural History Karlsruhe                                     | Germany                                                    |
| hoffman, peter        | emeritus mahematics professor                                   | University of Waterloo                                                        | Canada                                                     |
| Hoffman, Rosemary     | Adjunt Professor of Zoology                                     | Weber State University                                                        | United States of America (the)                             |
| Hoffman, Melanie      | Chemistry                                                       |                                                                               | Canada                                                     |
| Hoffman, Tali         | PhD Zoology                                                     | University of Cape Town                                                       | South Africa                                               |
| Hoffman, Jennifer     | Associate Professor, Physics & Astronomy                        | University of Denver                                                          | United States of America (the)                             |
| Hoffman, Daniel       | Graduate Student, Soil Ecology and Agricultural Ecology         | Michigan State University                                                     | United States of America (the)                             |
| Hoffman, Ian          | Research Scientist, Nuclear Engineering                         | Health Canada                                                                 | Canada                                                     |
| Hoffmann, Karl        | PhD Student                                                     | Max Planck Institute of Molecular Cell Biology and Genetics, Dresden, Germany | Germany                                                    |
| Hoffmann, Linn        | Senior Lecturer, Marine Botany                                  | University of Otago                                                           | New Zealand                                                |
| Hoffmann, Rene        | Head of the microanalytical laborataries / Palaeontologist      | Ruhr-Universitaet Bochum                                                      | Germany                                                    |
| Hoffmann, Dirk        | Research Engineer / Physics                                     | CNRS                                                                          | France                                                     |
| Hoffmann, Michael     | Professor                                                       | Cornell University                                                            | United States of America (the)                             |
| Hoffmann, Antoine     | PhD student in insect neuroethology                             | Max Planck Institute for Animal Behavior & University of Konstanz             | Germany                                                    |
| Hoffmann, Samuel      | Biogeography                                                    | University of Bayreuth                                                        | Germany                                                    |
| Hoffmann, Ilse        | Research Associate Behavioural Ecology                          | Department of Behavioural Biology, Univ. of Vienna                            | Austria                                                    |
| Hoffmann, Andre       | Biologist                                                       | Universidade Federal Fluminense                                               | Brazil                                                     |
| HOFFMANN, RODOLFO     | Senior Professor                                                | University of São Paulo                                                       | Brazil                                                     |

|                         |                                                         |                                                                |                                                            |
|-------------------------|---------------------------------------------------------|----------------------------------------------------------------|------------------------------------------------------------|
| Hoffner, Guylaine       | Academic Researcher in Neuroscience                     |                                                                | France                                                     |
| Hofhansl, Florian       | Researcher                                              | IIASA                                                          | Austria                                                    |
| Höfle, Ursula           | Research professor avian diseases                       | Universidad de Castilla - La Mancha                            | Spain                                                      |
| Hofmann, Erich          | PhD Student - Biological Sciences                       | Clemson University                                             | United States of America (the)                             |
| Hofmeister, Mirella     | Biologist                                               | University Kassel                                              | Germany                                                    |
| Hofmeyr, Sally          | Ecology, ornithology                                    | University of Cape Town                                        | South Africa                                               |
| Hogan, J. Aaron         | Ph.D. Student                                           | Florida International University                               | United States of America (the)                             |
| Hogan, Patrick          | Earth Scientist                                         | NASA Emeritus                                                  | United States of America (the)                             |
| Höge, Marvin            | PostDoc                                                 | Eawag                                                          | Switzerland                                                |
| Hoggett, Richard        | Research Manager, Energy Policy                         | University of Exeter                                           | United Kingdom of Great Britain and Northern Ireland (the) |
| Hohenberger, Annette    | Senior Lecturer/Cognitive Science                       | Osnabrueck University, Institute of Cognitive Science          | Germany                                                    |
| Hohenlohe, Paul         | Associate Professor, Biological Sciences                | University of Idaho                                            | United States of America (the)                             |
| Hohensee, Christiane    | Biologist, M Sc. Toxicology                             | NGO                                                            | Germany                                                    |
| Hohenwarter, Gerhard    | Meteorologist                                           | ZAMG - Zentralanstalt fuer Meteorologie und Geodynamik         | Austria                                                    |
| Hohmann, Marie          | Lecturer                                                | JGU Mainz                                                      | Germany                                                    |
| Höhn, Christoph         | Paediatrician                                           |                                                                | Germany                                                    |
| Höhne, Matthias         | Protein Biochemistry                                    | University of Greifswald                                       | Germany                                                    |
| Højlund Pedersen, Stine | Research scientist                                      | Colorado State University and University of Alaska Anchorage   | United States of America (the)                             |
| Hokan, May              | Programm Manager Conservation / Veterinarian            | WWF Germany                                                    | Germany                                                    |
| Holding, Stephen        | Consultant Clinical Scientist & Honorary Professor      | Hull University Hospitals NHS Trust & Hull York Medical School | United Kingdom of Great Britain and Northern Ireland (the) |
| Holding, Thomas         | Postdoctoral Research Associate                         | University of Exeter                                           | United Kingdom of Great Britain and Northern Ireland (the) |
| Holenstein, Kathrin     | PhD student                                             | University Montpellier /CNRS                                   | France                                                     |
| Holinski, Karsten       | Dipl-Biol.                                              | Ruhr Universität Bochum                                        | Germany                                                    |
| Holl, Karen             | Professor of Environmental Studies                      | University of California, Santa Cruz                           | United States of America (the)                             |
| Holla, Prasida          | Postdoc, Immunogenetics                                 | National Institutes of Health                                  | United States of America (the)                             |
| Holland, Susan          | Biochemistry                                            | Furman University                                              | United States of America (the)                             |
| Hollibaugh, James       | Distinguished Research Professor of Marine Sciences     | University of Georgia                                          | United States of America (the)                             |
| Hollingsworth, Margaret | Associate Professor Emeritus                            | University at Buffalo                                          | United States of America (the)                             |
| Hollins, John           | Ph. D. Biophysics                                       | Canadian Association for the Club of Rome                      | Canada                                                     |
| Hollister, Robert       | Biology Department                                      | Grand Valley State University                                  | United States of America (the)                             |
| Hollmann, Verena        | PhD student                                             | Hochschule Geisenheim                                          | Germany                                                    |
| Hollyer, Justine        | PhD Statistics                                          |                                                                | United Kingdom of Great Britain and Northern Ireland (the) |
| Holm, Federico          | Graduate Research Associate, Env. and Natural Resources | The Ohio State University                                      | United States of America (the)                             |
| Holmern, Tomas          | PhD - Biology                                           | Norwegian University of Science and Technology (NTNU)          | Norway                                                     |



|                               |                                                                                  |                                                                                                          |                                                               |
|-------------------------------|----------------------------------------------------------------------------------|----------------------------------------------------------------------------------------------------------|---------------------------------------------------------------|
| Holmes, Richard               | Professor Emeritus of Biology                                                    | Dartmouth College                                                                                        | United States of America (the)                                |
| Holmes, patricia              | Ecological Science                                                               | Stellenbosch University, Centre For Invasion Biology<br>And Conservation Ecology & Entomology Department | South Africa                                                  |
| Holmes, Glen                  | Marine Scientist                                                                 |                                                                                                          | Australia                                                     |
| Holmes, Ann                   | PhD Student, Ecology                                                             | University of California-Davis                                                                           | United States of America (the)                                |
| Holmes, MD, DrPH, Michelle D. | Associate Professor of Medicine & Epidemiology                                   | Harvard University                                                                                       | United States of America (the)                                |
| Holmgren, Sara                | Researcher in Environmental Communication                                        | Swedish University of Agricultural Sciences                                                              | Sweden                                                        |
| Holmquist, Gunnar             | MD                                                                               | Group Health Cooperative                                                                                 | United States of America (the)                                |
| Hölscher, Katharina           | Senior Researcher                                                                | DRIFT                                                                                                    | Netherlands (the)                                             |
| Holt, Donna                   | medical doctor                                                                   |                                                                                                          | United Kingdom of Great Britain<br>and Northern Ireland (the) |
| Holthuijzen, Wieteke          | NSF Graduate Fellow                                                              | Northern Illinois University                                                                             | United States of America (the)                                |
| Holthuis, Joost               | Professor of Molecular Cell Biology                                              | University of Osnabrueck                                                                                 | Germany                                                       |
| Holtzum, Charlotte            | Biology                                                                          |                                                                                                          | Germany                                                       |
| Holubová, Michaela            | PhD student                                                                      | Czech academy of Sciences                                                                                | Czech Republic (the)                                          |
| Holveck, Marie-Jeanne         | Postdoc Behavioural Ecology                                                      | CEFE-CNRS                                                                                                | France                                                        |
| Holwerda, Benne               | Associate Professor in Astronomy                                                 | University of Louisville                                                                                 | United States of America (the)                                |
| Holz, Joachim                 | Dr. rer. nat (Physicist)                                                         | Siemens AG                                                                                               | Germany                                                       |
| Holzapfel, Helmut             | Prof. Urban Planner Transport Engineer Scientist<br>working on Mobility          | Leader of the Centre for Mobility Culture, Kassel,<br>Germany                                            | Germany                                                       |
| Holzhauser, Sascha            | System Science                                                                   | University of Kassel                                                                                     | Germany                                                       |
| Homberger, Dominique          | Alumni Professor, Dept of Biological Sciences                                    | Louisiana State Universities                                                                             | United States of America (the)                                |
| Homeier, Juergen              | Tropical Plant Ecology                                                           | University of Goettingen                                                                                 | Germany                                                       |
| Homola, Ellen                 | Biologist                                                                        | University of Alberta                                                                                    | Canada                                                        |
| Homsak, Marko                 | Head of EMS; Chem. Eng.                                                          | Production company                                                                                       | Slovenia                                                      |
| Homsak, Miha                  | PhD candidate                                                                    | The Francis Crick Institute                                                                              | United Kingdom of Great Britain<br>and Northern Ireland (the) |
| Honan, Amy                    | Lecturer in Biology                                                              | Western Colorado University                                                                              | United States of America (the)                                |
| Honegger, Matthias            | Research Associate, Environmental and Political<br>Sciences                      | University of Utrecht, IASS and Perspectives Climate<br>Research                                         | Germany                                                       |
| Höner, Oliver                 | Senior Scientist, Evolutionary Ecology, Head<br>Ngorongoro Hyena Project         | Leibniz Institute for Zoo and Wildlife Research                                                          | Germany                                                       |
| Honmrich, Dirk                | Science Policy Advisor                                                           | German Council for Scientific Information<br>Infrastructures (RfII)                                      | Germany                                                       |
| Honorio, Romain               | PhD Student in Evolutionary Ecology                                              | Sorbonne Université                                                                                      | France                                                        |
| Honrado, Carlos               | Postdoctoral Research Associate                                                  | University of Virginia                                                                                   | United States of America (the)                                |
| Hons, Michael                 | Scientist                                                                        | EMBL                                                                                                     | France                                                        |
| Hood AM, Prof David A         | Adjunct Professor, Environmental engineering,<br>sustainability, climate science | University of Queensland                                                                                 | Australia                                                     |
| Hoogesteyn, Almira            | Environmental toxicologist                                                       | Centro de Investigación y de Estudios Avanzados del<br>IPN                                               | Mexico                                                        |
| Hoogmoed, Marinus             | Guest Researcher                                                                 | Museu Paraense Emilio Goeldi                                                                             | Brazil                                                        |

|                          |                                         |                                                                                                                            |                                                            |
|--------------------------|-----------------------------------------|----------------------------------------------------------------------------------------------------------------------------|------------------------------------------------------------|
| Hooijmeijer, Jos         | ecologist                               | University of Groningen                                                                                                    | Netherlands (the)                                          |
| Hooke, Rachel            | Marine Biologist                        | University of Southampton                                                                                                  | United Kingdom of Great Britain and Northern Ireland (the) |
| Hooke, Roger             | Research Professor                      | University of Maine                                                                                                        | United States of America (the)                             |
| Hooker, Sascha           | Professor                               | University of St Andrews                                                                                                   | United Kingdom of Great Britain and Northern Ireland (the) |
| Hopfenmüller, Sebastian  | PHD Student                             | University of Würzburg                                                                                                     | Germany                                                    |
| Hopkins, Stephen         | Physics Researcher (Retired 2017)       | Durham University                                                                                                          | United Kingdom of Great Britain and Northern Ireland (the) |
| Hoppe, Theresa           | Master student in physics               | University of Göttingen                                                                                                    | Germany                                                    |
| Hoppe, Björn             | Senior scientist - Forest pathology     | Julius Kühn-Institut                                                                                                       | Germany                                                    |
| Hoppenreijts, Jacqueline | PhD Candidate                           | Karlstad University                                                                                                        | Sweden                                                     |
| Hora, Karla Emmanuela    | Researcher                              | Goias Federal University                                                                                                   | Brazil                                                     |
| Horak, Julia             | Terrestrial Ecology                     | University Vienna                                                                                                          | Austria                                                    |
| Hordoir, Robinson        | Researcher                              | Institute of Marine Research                                                                                               | Norway                                                     |
| Horne, Jeremy            | Program Committee member and consultant | International Institute of Informatics and Systemics                                                                       | United States of America (the)                             |
| Hornic, Betty            | PhD student                             | Groningen University                                                                                                       | Netherlands (the)                                          |
| Horodyskyj, Ulyana       | scientist                               | Science in the Wild                                                                                                        | United States of America (the)                             |
| Horrell, Sam             | Postdoc in Structural Biology           | Universitaet Hamburg                                                                                                       | Germany                                                    |
| Horrocks, Nicholas       |                                         | University of Cambridge                                                                                                    | United Kingdom of Great Britain and Northern Ireland (the) |
| Horst, Christina         | Masters Student                         | University of British Columbia                                                                                             | Canada                                                     |
| Horta, Paulo             | Associate Professor                     | UNiversidade Federal de Santa Catarina                                                                                     | Brazil                                                     |
| HORTA, Quentin           | PhD student                             | University of Iceland                                                                                                      | Iceland                                                    |
| Hortal, Joaquín          | Tenured Scientist                       | Museo Nacional de Ciencias Naturales (MNCN-CSIC)                                                                           | Spain                                                      |
| Hortas, Francisco        | University Professor of Biology         | University of Cádiz                                                                                                        | Spain                                                      |
| Hörtnagl, Lukas          | Data Scientist                          | ETH Zurich                                                                                                                 | Switzerland                                                |
| Horton, Richard John     | Consultant                              | Tropical Projects                                                                                                          | United Kingdom of Great Britain and Northern Ireland (the) |
| Horton, Tammy            | Research Scientist, Marine Biology      | National Oceanography Centre, Southampton                                                                                  | United Kingdom of Great Britain and Northern Ireland (the) |
| Horton, David            | Palaeoecology (Retired)                 | Australian Institute of Aboriginal & Torres Strait Islander Studies (until 1998)                                           | Australia                                                  |
| Horvath, Anna            | General Coordinator                     | Instituto Montebello, Centro Interdisciplinario para el Fomento del Desarrollo Integral en la Frontera Sur de México, A.C. | Mexico                                                     |
| Horváth, Zsófia          | Research fellow, ecology                | Centre for Ecological Researchm Balaton Limnological Institute                                                             | Hungary                                                    |
| Hosenfeld, Friedhelm     | Computer Scientist                      | DigSyLand                                                                                                                  | Germany                                                    |
| Hosking, Robert          | Medical Practitioner                    |                                                                                                                            | Australia                                                  |
| Hoskins, Dick            | Epidemiologist , retired                | Washington State Department of Health, University of Washington, School of Public Health                                   | United States of America (the)                             |

|                            |                                                                    |                                                                                                |                                                            |
|----------------------------|--------------------------------------------------------------------|------------------------------------------------------------------------------------------------|------------------------------------------------------------|
| Hoskisson, Paul            | Professor of Molecular Microbiology                                | University of Strathclyde                                                                      | United Kingdom of Great Britain and Northern Ireland (the) |
| Hosley, Mark               | Biological Sciences - Retired                                      | Retired                                                                                        | United States of America (the)                             |
| Hosp, Julia                | Biologist                                                          | Vetmeduni Vienna                                                                               | Austria                                                    |
| Hossie, Thomas             | Assistant Professor (Biology)                                      | Trent University                                                                               | Canada                                                     |
| Hough, Gerald              | Neuroscience                                                       | Rowan University                                                                               | United States of America (the)                             |
| Hough-Snee, Nate           | Ecologist                                                          | Meadow Run Environmental LLC                                                                   | United States of America (the)                             |
| Houle, Faith               | Professor/Microbiology                                             | Johns Hopkins University                                                                       | United States of America (the)                             |
| Houle, Mark                | Climate Scientist                                                  | The Royal Institution of Great Britain                                                         | United Kingdom of Great Britain and Northern Ireland (the) |
| Hourdez, Stephane          | Researcher                                                         | CNRS                                                                                           | France                                                     |
| Houska, Tobias             | Postdoc                                                            | Justus Liebig University Giessen                                                               | Germany                                                    |
| Houssaye, Alexandra        | Researcher                                                         | CNRS                                                                                           | France                                                     |
| Houtman, Rachel            | Faculty Research Assistant                                         | Oregon State University                                                                        | United States of America (the)                             |
| Houwman, Evert             | Lecturer, physics                                                  | University of Twente                                                                           | Netherlands (the)                                          |
| Houwman, Joseline          | Biochemistry                                                       | Utrecht University                                                                             | Netherlands (the)                                          |
| Hövel, Marion              | Dipl.-Ing Werkstoffwissenschaft                                    | TK- Steel                                                                                      | Germany                                                    |
| How, Penelope              | Post-Doctoral Researcher                                           | University of York                                                                             | United Kingdom of Great Britain and Northern Ireland (the) |
| Howard, Ryan               | Graduate Student                                                   | Imperial College London                                                                        | United Kingdom of Great Britain and Northern Ireland (the) |
| Howard, Andrew             | PhD Student, Biochemistry                                          | University of Waikato                                                                          | New Zealand                                                |
| Howard, Alexandra          | Researcher in avian biology                                        | VulPro NGO                                                                                     | South Africa                                               |
| Howe, Logan                | Physicist                                                          | National Institute of Standards and Technology                                                 | United States of America (the)                             |
| Howe, Kristy               | Wildlife Biologist                                                 | Nevada Natural Heritage Program                                                                | United States of America (the)                             |
| Hoyo, Carlos               | Professor/Pharmacology                                             | Cinvestav-IPN                                                                                  | Mexico                                                     |
| Hoyte, Stephen             | Scientist Plant pathology and biocontrol                           | The NZ Institute of Plant and Food Research                                                    | New Zealand                                                |
| Hrabalkova, Lenka          | Postdoctoral researcher                                            | Institute of Immunology and Infection Research                                                 | United Kingdom of Great Britain and Northern Ireland (the) |
| Hrabe de Angelis, Isabella | PhD Candidate in Atmospheric Chemistry and Microbiology            | Max Planck Institute for Chemistry                                                             | Germany                                                    |
| Hrachowitz, Markus         | Associate Professor Hydrology                                      | Delft University of Technology                                                                 | Netherlands (the)                                          |
| Hrbek, Tomas               | Professor                                                          | Federal University of Amazonas                                                                 | Brazil                                                     |
| Hrivnák, Richard           | senior researcher, vegetation ecology                              | Institute of Botany, Plant Science and Biodiversity Center, Slovak Academy of Sciences         | Slovakia                                                   |
| Hsu, Huang-Hsiung          | Distinguished Research Fellow/Climate Science                      | Anthropogenic Climate Change Center, Research Center for Environmental Change, Academia Sinica | Taiwan                                                     |
| HSU, JIH-YIH               | Professor                                                          | National Chung Hsing University                                                                | Taiwan                                                     |
| HSU, Gloria Kuang-Jung     | Professor                                                          | National Taiwan University                                                                     | Taiwan                                                     |
| Hu, Darcy                  | Ecologist                                                          | National Park Service, retired                                                                 | United States of America (the)                             |
| Huacuz, Rafael             | Cordinador de la Maestría en Planeación y Ordenamiento Territorial | Universidad Latina de America                                                                  | Mexico                                                     |

|                        |                                                                       |                                                      |                                                            |
|------------------------|-----------------------------------------------------------------------|------------------------------------------------------|------------------------------------------------------------|
| Huang, Danwei          |                                                                       | National University of Singapore                     | Singapore                                                  |
| Huaranca, Juan Carlos  | Ph.D Candidate                                                        | Universidad Mayor de San Simon                       | Bolivia (Plurinational State of)                           |
| Huba, Mikulas          | prof. ,geographer                                                     | Institute of Geography, Slovak Academy of Sciences   | Slovakia                                                   |
| Hubbe, Alex            | Professor                                                             | Universidade Federal da Bahia                        | Brazil                                                     |
| Huber, Martina         |                                                                       | Utrecht University                                   | Netherlands (the)                                          |
| Huber, Djuro           | Professor emeritus                                                    | Faculty of Veterinary Medicine, Zagreb               | Croatia                                                    |
| Huber, Martin          | PhD in Environmental Social Sciences                                  | Universität Bern                                     | Switzerland                                                |
| Huber, Bernhard A.     |                                                                       | Alexander Koenig Zoological Research Museum          | Germany                                                    |
| Huber, Jürgen          | Porfessor of Finance                                                  | Universität Innsbruck                                | Austria                                                    |
| Huberman, Joel         | Professor Emeritus                                                    | Roswell Park Cancer Institute                        | United States of America (the)                             |
| Hubin, Norbert         | Physicist                                                             | European Southern Observatory                        | Germany                                                    |
| Hubler, Shannon        | Aquatic Ecologist                                                     | Oregon Department of Environmental Quality           | United States of America (the)                             |
| Hubot, Nathan          | PhD student in ocean and hearth sciences                              | University of Southampton                            | United Kingdom of Great Britain and Northern Ireland (the) |
| Hubrich, Hanna         | PhD student - chemistry                                               | Georg-August University Göttingen                    | Germany                                                    |
| Huchard, Elise         | Researcher in ecology and evolutionary biology                        | CNRS                                                 | France                                                     |
| Huchon, Dorothee       | Professor in Zoology                                                  | Tel-Aviv University                                  | Israel                                                     |
| Huck, Andreas          | Climate Change Adaptation/Geography                                   | German Environment Agency                            | Germany                                                    |
| Hudcová, Magdalena     | Medical doctor, Oncologist                                            | Palacky University Olomouc                           | Czech Republic (the)                                       |
| Huddleston, Chad       | Instructor, Anthropology                                              | Southern Illinois University, Edwardsville           | United States of America (the)                             |
| Hudiburg, Tara         | Associate Professor                                                   | University of Idaho                                  | United States of America (the)                             |
| Hudson, Spencer        |                                                                       | Utah State University                                | United States of America (the)                             |
| Hudson, John           | Restoration Biologist                                                 | Southeast Alaska Watershed Coalition                 | United States of America (the)                             |
| Hudson, Jonathan       | Ecologist                                                             | Natural resources wales                              | United Kingdom of Great Britain and Northern Ireland (the) |
| Huebener, PD Dr. Heike | Senior Researcher in Meteorology, Lecturer in Climate Geography       | Univerity Gießen                                     | Germany                                                    |
| Huebler, Michael       | Lecturer in Economics                                                 | University Gießen/Hannover                           | Germany                                                    |
| Huebsch, Frank         | Professional Civil Engineer (California)                              |                                                      | United States of America (the)                             |
| Huelamo, Nuria         | Research Scientist/Astrophysics                                       | CAB (CSIC-INTA)                                      | Spain                                                      |
| Huet, Valérie          | Biology                                                               | La Rochelle university-LIENSs                        | France                                                     |
| Hufford, Mary          | Faculty, Social Research Methods                                      | Future Generations University                        | United States of America (the)                             |
| Hufton, Joshua         | Phd                                                                   | Uppsala university                                   | Sweden                                                     |
| Hugé, Jean             | Professor & Postdoctoral Researcher, Biology & Sustainability Science | Université Libre de Bruxelles & Universiteit Hasselt | Belgium                                                    |
| Hughes, Colin          | FRACGP MBBS FORMER HEAD PUBLIC HEALTH                                 | CURTIN UNIVERSITY                                    | Australia                                                  |
| Hughes, Lesley         | Professor                                                             | Macquarie University                                 | Australia                                                  |
| Hughes, Annie          | Staff Astronomer                                                      | Observatoire de Midi-Pyrenees                        | France                                                     |
| Hughes, Mark           | Professor, Wood Science                                               | Aalto University                                     | Finland                                                    |
| HUGHES, ROBERT         | REGIONAL AQUATIC ECOLOGIST                                            | AMNIS OPES INSTITUTE & OREGON STATE UNIVERSITY       | United States of America (the)                             |
| Hughey, Lacey          | Ecology                                                               | University of California, Santa Barbara              | United States of America (the)                             |

|                      |                                                                                  |                                                |                                                            |
|----------------------|----------------------------------------------------------------------------------|------------------------------------------------|------------------------------------------------------------|
| Hugle, Thomas        | PhD candidate in physics                                                         | Max-Planck-Institut für Kernphysik             | Germany                                                    |
| Huguet, S            | PhD Student                                                                      | University of Bristol                          | United Kingdom of Great Britain and Northern Ireland (the) |
| Huillet, Thierry     | CNRS Researcher                                                                  | CY Cergy University                            | France                                                     |
| Huising, Elzo Jeroen | Soil Scientist                                                                   | International Insitute of Tropical Agriculture | Nigeria                                                    |
| Huisman, Robert      | Instrument scientist                                                             | SRON                                           | Netherlands (the)                                          |
| Huizenga, Juliana    | Environmental Engineering                                                        |                                                | United States of America (the)                             |
| Hülber, Karl         | Researcher                                                                       | University of Vienna                           | Austria                                                    |
| Hulbert, Joseph      | PhD Candidate                                                                    | University of Pretoria                         | South Africa                                               |
| Hulett, Eduardo      | professor                                                                        | Universidad Nacional de Cordoba                | Argentina                                                  |
| Hull, Heath          | MSc Zoology and Entomology, Life Science and Academic Head                       | Yeshiva College of South Africa                | South Africa                                               |
| Hull, Kelvin         | PhD Candidate                                                                    | Stellenbosch University                        | South Africa                                               |
| Hulot, Florence      | Researcher - Associate professor in ecology                                      | Paris-Sud University                           | France                                                     |
| Hulshof, Catherine   | Assistant Professor                                                              | Virginia Commonwealth University               | United States of America (the)                             |
| Hulsman, Kees        | Ecologist                                                                        | Griffith University                            | Australia                                                  |
| Hultman, Jenni       | Academy research fellow                                                          | University of Helsinki                         | Finland                                                    |
| Humann, Fernanda     | Professor                                                                        | Instituto Federal Catarinense                  | Brazil                                                     |
| Hummer, Philipp      | Citizen Science                                                                  | SPOTTERON                                      | Austria                                                    |
| Humphrey, Glynis     | Fire Ecologist - Postdoctoral Research Fellow                                    | African Climate and Development Initiaitive    | South Africa                                               |
| Humphreys, James     | Emeritus Professor of Mathenatics & Statistics                                   | U. Massachusetts Amherst                       | United States of America (the)                             |
| Humphreys, William   | Adjunct Professor                                                                | University of Western Australia                | Australia                                                  |
| Humphries, Hope      | Research Associate                                                               | University of Colorado at Boulder              | United States of America (the)                             |
| Hung, Chih-Ming      | Assistant Research Fellow                                                        | Biodiversity Research Center, Academia Sinica  | Taiwan                                                     |
| Hunt, Carter         | Associate Professor / Recreation, Park, and Tourism Management, and Anthropology | Penn State University                          | United States of America (the)                             |
| Hunt, Gaelia         | Veterinary Science                                                               | South Metro TAFE Perth Western Australia       | Australia                                                  |
| Hunter, Jill         | Research Scientist (Cancer Research)                                             | Newcastle University                           | United Kingdom of Great Britain and Northern Ireland (the) |
| Hunter, Art          | Hypersonic Aerodynamics                                                          | Imperial College, University of London         | United Kingdom of Great Britain and Northern Ireland (the) |
| Hunter, Malcolm      | Professor of Wildlife Ecology                                                    | University of Maine                            | United States of America (the)                             |
| Hunter, David        | Ecologist-Retired                                                                |                                                | Australia                                                  |
| Huntley, Brian       | Emeritus Professor of Biosciences                                                | Durham University                              | United Kingdom of Great Britain and Northern Ireland (the) |
| Hunziker, Lukas      | Forest Pathology                                                                 |                                                | Switzerland                                                |
| Hunziker, Yannick    | Master Student / Aquatic Ecology                                                 | Eawag, Kastanienbaum                           | Switzerland                                                |
| huon, Alice          | agronome                                                                         |                                                | France                                                     |
| Hupé, Jean-Michel    | Researcher in Neurosciences and Political Ecology                                | CNRS                                           | France                                                     |
| Huppés, Gjalt        | Senior Researcher                                                                | CML, Leiden University                         | Netherlands (the)                                          |
| Huraux, Thomas       | Researcher in Computer Science                                                   | Scalian Lab                                    | France                                                     |

|                       |                                                            |                                                                  |                                                            |
|-----------------------|------------------------------------------------------------|------------------------------------------------------------------|------------------------------------------------------------|
| Hurford, Anthony      | Water Resources Management                                 | University of Manchester                                         | United Kingdom of Great Britain and Northern Ireland (the) |
| Hurka, Sabine         |                                                            | Justus-Liebig-University Giessen                                 | Germany                                                    |
| Hurni, Kaspar         | PhD in Geography                                           | Centre for Development and Environment (CDE), University of Bern | Switzerland                                                |
| Hurtado, Adriana      |                                                            | Universidad de los Andes                                         | Colombia                                                   |
| Hurth, Victoria       | Senior Associate                                           | University of Cambridge Institute for Sustainability Leadership  | United Kingdom of Great Britain and Northern Ireland (the) |
| husband, vicky        | environmental activist                                     |                                                                  | Canada                                                     |
| Huss, Matthias        | Glaciologist                                               | ETH Zürich                                                       | Switzerland                                                |
| Hussain, Muzafar      | Assistant Professor, Faculty of Natural Sciences           | Shah Abdul Latif University, Khairpur                            | Pakistan                                                   |
| Hussain, Syed Ainul   | Scientist G                                                | Wildlife Institute of India                                      | India                                                      |
| Hussey, Steven        | Senior Lecturer: Genetics                                  | University of Pretoria                                           | South Africa                                               |
| Husso, Aleks          | PhD student                                                | University of Helsinki                                           | Finland                                                    |
| husson, laurent       | researcher, geology                                        | CNRS                                                             | France                                                     |
| Huston, Daniel        | Postdoctoral fellow                                        | University of Tasmania                                           | Australia                                                  |
| Hutárová, Daniela     | Research scientist                                         | Institute of Landscape Ecology SAS, Bratislava                   | Slovakia                                                   |
| Hutchins, Patricia    | Energy Analyst and Operations Research Analyst             | Energy Information Administration                                | United States of America (the)                             |
| Hutchinson, Helen     | Retired social scientist (sociology of health and illness) |                                                                  | Australia                                                  |
| Hutchinson, John      | Professor of Biology                                       | Royal Veterinary College                                         | United Kingdom of Great Britain and Northern Ireland (the) |
| Hüther, Christoph     | Sociology                                                  | University of Cassel                                             | Germany                                                    |
| Hüttel, Hans          | Associate Professor, Computer Science                      | Department of Computer Science, University of Copenhagen         | Denmark                                                    |
| Buttenhofer, Mario    | Chemist                                                    | University of Applied Science Albstadt-Sigmaringen               | Germany                                                    |
| HUTTO, RICHARD        | Emeritus Professor of Biology and Wildlife Biology         | University of Montana                                            | United States of America (the)                             |
| Huycke, Pieter        | PhD researcher                                             | Ghent University                                                 | Belgium                                                    |
| Huynh, Howard         | Postdoctoral Research Fellow                               | University of New Brunswick                                      | Canada                                                     |
| Hwang, Sung-Jin       | Professor                                                  | Woosuk University                                                | Korea (the Republic of)                                    |
| Hwang, Bernice        | Ecosystem Science                                          | Lund University                                                  | Sweden                                                     |
| Hyman, Amanda         | Ecology and Evolutionary Biology                           | University of Tennessee                                          | United States of America (the)                             |
| Hytonen, Timo         | Professor, plant sciences                                  | University of Helsinki                                           | Finland                                                    |
| Hyvonen, Katriina     | Researcher/psychology                                      | University of Jyväskylä                                          | Finland                                                    |
| Iacolina, Laura       | Conservation Biology                                       | University of Zagreb                                             | Croatia                                                    |
| IACONO, FABRIZIO      | PhD student                                                | University of Liège                                              | Belgium                                                    |
| Iannella, Mattia      | Research fellow                                            | University of L'Aquila                                           | Italy                                                      |
| Iannuzzi, Sara        | Pharmacology & Bioinformatics                              |                                                                  | Italy                                                      |
| Ibanez, Thomas        | Postdoctoral researcher in forest ecology                  | University of Hawaii at Hilo                                     | United States of America (the)                             |
| Ibáñez, Manuel        | Professor/Solar energy                                     | Universitat de Lleida                                            | Spain                                                      |
| Ibarbalz, Federico M. | Postdoc - Biology                                          | Institut de biologie de l' Ecole normale supérieure (IBENS)      | France                                                     |
| Ibarguchi, Gabriela   | Conservation Scientist                                     | Living Corridor                                                  | Canada                                                     |

|                         |                                      |                                                                     |                                                            |
|-------------------------|--------------------------------------|---------------------------------------------------------------------|------------------------------------------------------------|
| Ibarra, Daniel          | Postdoctoral Fellow                  | UC Berkeley                                                         | United States of America (the)                             |
| Ibarra, Federico        | PhD student in geology               | CONICET                                                             | Argentina                                                  |
| Ibarra, Jorge           | Professor                            | Cinvestav-Irapuato                                                  | Mexico                                                     |
| Ibrahim, Aya            | PhD student                          | Fondazione Edmund Mach                                              | Italy                                                      |
| ice, charles            | hydrologist                          | state of hawaii                                                     | United States of America (the)                             |
| Idzerda, Rejean         | Pharmacology and Medicine, retired   | University of Washington                                            | United States of America (the)                             |
| IGWE, ORISA             | Professor                            | University of Missouri at Kansas City                               | United States of America (the)                             |
| Ihle, Malika            | post doctoral researcher             |                                                                     | France                                                     |
| Ilany, Amiyaal          |                                      | Bar-Ilan University                                                 | Israel                                                     |
| Ile, Omoyemeh           | Teaching Assistant/M.sc Forestry     | North Carolina State University                                     | United States of America (the)                             |
| Iler, Raeann            | Lab Assistant                        | SCCWRP                                                              | United States of America (the)                             |
| Iler, Amy               | Conservation Scientist, Ecology      | Chicago Botanic Garden                                              | United States of America (the)                             |
| Iles, Alastair          | Professor, Environmental Policy      | UC Berkeley                                                         | United States of America (the)                             |
| Ilievska, Maja          | PhD student in Plant Biology         | University of Helsinki                                              | Finland                                                    |
| Ilka Alina, Fischer     | B. Sc. Biology                       | University of Bremen                                                | Germany                                                    |
| Illan, Javier           | Research Associate                   | Washington State University                                         | United States of America (the)                             |
| Illera, Juan Carlos     | Lecture un Ecology                   | University of Oviedo                                                | Spain                                                      |
| Illian, Janine          | Professor Statistical Sciences       | University of Glasgow                                               | United Kingdom of Great Britain and Northern Ireland (the) |
| Iltis, Corentin         | PhD Student                          | Université de Bourgogne Franche-Comté                               | France                                                     |
| Ilvessalo, Saara        | University Teacher in Law            | Åbo Akademi University                                              | Finland                                                    |
| Ilyad Ahmad, Aria       | Global Health Foresighting Fellow    | Dahdaleh Institute for Global Health, York University               | Canada                                                     |
| Imaz, Mireya            | Ecology                              | UNAM, México                                                        | Mexico                                                     |
| Imbert Auvray, Nathalie | Assistant Professor                  | La Rochelle University, LIENSs Laboratory, UMR                      | France                                                     |
| Imbulana, Upali         | Civil Engineer/Irrigation Specialist | UNDP (Consultant)                                                   | Sri Lanka                                                  |
| Imfeld, Gwenaël         | Research scientist                   | National Centre for Scientific Research (CNRS)                      | France                                                     |
| Imlay, Marc             | Conservation biologist               | Mid-Atlantic Invasive Plant Council                                 | United States of America (the)                             |
| Immerzeel, Walter       | Professor mountain hydrology         | Utrecht University                                                  | Netherlands (the)                                          |
| Immonen, Elina          | Assistant Professor                  | Uppsala University                                                  | Sweden                                                     |
| Impellizzeri, Violette  | astronomer                           | Atacama Large Millimeter/submillimeter Array                        | Chile                                                      |
| Imperio, Simona         | Researcher                           | ISPRA - Italian Institute for Environmental Protection and Research | Italy                                                      |
| Inacio, Luanna          | Biomedical Scientist                 | UNIFESP                                                             | Brazil                                                     |
| İNAN, Yusuf Deniz       | Sustainability                       | Yalova Municipality                                                 | Turkey                                                     |
| Inclan, Maria           | Profesora-Investigadora              | Centro de Investigacion y Docencia Economicas                       | Mexico                                                     |
| Indelicato, Claire      | PhD student                          | ENS Lyon                                                            | France                                                     |
| Indigo, Naomi           | Ecologist/project coordinator        | BirdLife Australia                                                  | Australia                                                  |
| Indraswari, Karlina     | Postdoc in conservation              | University of Queensland                                            | Australia                                                  |
| Indrawan, Mochamad      | environmental scientist              | Universitas Indonesia - Research Center for Climate Change          | Indonesia                                                  |

|                          |                                                                                           |                                                                            |                                        |
|--------------------------|-------------------------------------------------------------------------------------------|----------------------------------------------------------------------------|----------------------------------------|
| Ingalsbee, Timothy       | Executive Director/ Environmental Sociologist                                             | Firefighters United for Safety, Ethics, and Ecology (FUSEE)                | United States of America (the)         |
| Ingeman, Kurt            | Postdoctoral Researcher, David H. Smith Conservation Research Fellow, Marine Conservation | UC Santa Barbara                                                           | United States of America (the)         |
| Ingley, Spencer          | Assistant Professor of Biology                                                            | Brigham Young University-Hawaii                                            | United States of America (the)         |
| Ingólfsson, Ólafur       | Professor of geology                                                                      | University of Iceland                                                      | Iceland                                |
| Inka, Willms             | PhD in microbiology                                                                       | Georg-August-University Göttingen                                          | Germany                                |
| Inogwabini, Bila-Isia    | Researcher                                                                                |                                                                            | Congo (the Democratic Republic of the) |
| Inouye, David            | Professor Emeritus / ecology                                                              | University of Maryland                                                     | United States of America (the)         |
| Inumaru, Mizue           | DVM, PhD student                                                                          | Nihon University                                                           | Japan                                  |
| Iosif, Ruben             | Associate Researcher                                                                      | Unicersity Ovidius of Constanta                                            | Romania                                |
| Iosifidis, Christos      | Remote Sensing Instructor and Researcher                                                  | National Technical University of Athens                                    | Greece                                 |
| Iporac, Lowell Andrew    | Ph.D Candidate                                                                            | Florida International Univeristy                                           | United States of America (the)         |
| Iracane, Elise           | PhD student, microbiology                                                                 | University college Dublin                                                  | Ireland                                |
| Iraeta Orbegoza, Miren   |                                                                                           | GLOBE Institute                                                            | Denmark                                |
| Irastorza azcarate, Ibai | Postdoc / bioinformatics                                                                  | Bimsb, MDC                                                                 | Germany                                |
| Irazuzta, Sebastian      | Biologist                                                                                 | McMaster University                                                        | Canada                                 |
| Iriondo, Jose            | Full Professor Ecology                                                                    | Universidad Rey Juan Carlos                                                | Spain                                  |
| Iriondo-DeHond, Amaia    | PhD Student in Food Science                                                               | Instituto de Investigación en Ciencias de la Alimentación (CIAL, UAM-CSIC) | Spain                                  |
| Irisarri, Iker           | Postdoctoral researcher                                                                   | Museo Nacional de Ciencias Naturales (MNCN-CSIC)                           | Spain                                  |
| Irish, Vivian            | Professor                                                                                 | Yale Univ                                                                  | United States of America (the)         |
| Irish, John              | Entomologist                                                                              | Namibia Biodiversity Database                                              | Namibia                                |
| Irl, Severin             | Professor of Biogeography and Biodiversity                                                | Institute of Physical Geography, Goethe-University Frankfurt               | Germany                                |
| Irmin, Dr. Fruth         | Geology                                                                                   | retired from Bayr. Geologische Staatssammlung                              | Germany                                |
| Irume, Mariana           | Post-Doctoral                                                                             | NATIONAL INSTITUTE OF AMAZONIAN RESEARCH - INPA                            | Brazil                                 |
| Irving, Damien           | Climate scientist                                                                         | University of New South Wales                                              | Australia                              |
| Isaia, Marco             | Associate professor                                                                       | University of Torino                                                       | Italy                                  |
| Isaksen, Katja Elisabeth | PhD student, Animal Science                                                               | Massey University                                                          | New Zealand                            |
| Isaza, Carolina          | Assistant professor                                                                       | Universidad Militar Nueva Granada                                          | Colombia                               |
| Isbell, Forest           | Assistant Professor of Ecology                                                            | University of Minnesota Twin Cities                                        | United States of America (the)         |
| Isensee, Joerg           | Senior Scientist                                                                          | University of Cologne                                                      | Germany                                |
| Iskrzynski, Mateusz      | postdoctoral researcher, complex systems analysis                                         | International Institute for Applied Systems Analysis                       | Austria                                |
| Isla, Enrique            | Researcher                                                                                | Institut de Ciències del Mar-CSIC                                          | Spain                                  |
| Islam, Mohammad Zahirul  | Executive Director, Biologist                                                             | Marinelife Alliance                                                        | Bangladesh                             |
| Islam, Mainul            | Clinician-Scientist (Medicine)                                                            | Rajshahi Medical College Hospital                                          | Bangladesh                             |
| Islam, Shikder Saiful    | PhD student                                                                               | University of Tasmania                                                     | Bangladesh                             |
| Islas-Flores, Tania      | Sciences PhD                                                                              | UNAM                                                                       | Mexico                                 |



|                            |                                                                        |                                                                                              |                                                            |
|----------------------------|------------------------------------------------------------------------|----------------------------------------------------------------------------------------------|------------------------------------------------------------|
| ISSBERNER, LIZ REJANE      | senior researcher                                                      | BRAZILIAN INSTITUTE OF SCIENCE AND TECHNOLOGY INFORMATION                                    | Brazil                                                     |
| Isselin, Francis           | Associate Professor Ecology                                            | CNRS                                                                                         | France                                                     |
| Itescu, Yuval              | Postdoc                                                                | Freie Universität Berlin                                                                     | Germany                                                    |
| Iturriza-Gomara, Miren     | Professor of Virology                                                  | University of Liverpool                                                                      | United Kingdom of Great Britain and Northern Ireland (the) |
| Ivan, Taavi                | PhD in Chemistry, Product Development and Technology Specialist        | Solis BioDyne                                                                                | Estonia                                                    |
| Ivanauskas, Natalia        | Researcher                                                             | Instituto Florestal de São Paulo                                                             | Brazil                                                     |
| Ivančić, Ingrid            | senior researcher/chemical oceanography                                | Institute Ruđer Bošković/Centre for Marine Research                                          | Croatia                                                    |
| Ivanov, Vladislav          | PhD in geosciences                                                     | Politecnico di Milano                                                                        | Italy                                                      |
| Ivanova, Silviya           | PhD student                                                            | University of Windsor                                                                        | Canada                                                     |
| Iverson, Louis             | Research ecologist                                                     | USDA Forest Service                                                                          | United States of America (the)                             |
| Iverson, Autumn            | Ecology                                                                | University of California, Davis                                                              | United States of America (the)                             |
| Ivins, Erik                | American Geophysical Union Fellow / Cryosphere and Solid Earth Science | Jet. Propulsion Lab., California Institute of Technology                                     | United States of America (the)                             |
| Ivkovic, Marija            | Assistant Professor/ Zoology, Ecology                                  | University of Zagreb, Faculty of Science, Department of Biology                              | Croatia                                                    |
| Ivkovich, Milos            | Data Analyst/Scientist                                                 | Tree Breeding Australia/CSIRO                                                                | Australia                                                  |
| Izac, Anne-Marie           | Chair of the CGIAR research program on Forests, Trees and Agroforestry | CIFOR                                                                                        | United Kingdom of Great Britain and Northern Ireland (the) |
| Izadi, Sahar               | Marine Science                                                         |                                                                                              | New Zealand                                                |
| Izzo, Thiago               | Associate professor                                                    | Departamento de Ecologia e Botânica-UFMT                                                     | Brazil                                                     |
| Jaacks, Lindsay            | Assistant Professor of Global Health                                   | Harvard University                                                                           | United States of America (the)                             |
| Jablonowski, Nicolai David | Senior Research Scientist                                              | Forschungszentrum Jülich GmbH, IBG-2: Plant Sciences                                         | Germany                                                    |
| Jabłońska, Ewa             | Assistant professor, Vegetation ecology                                | Faculty of Biology, University of Warsaw                                                     | Poland                                                     |
| Jabot, Richard             | Postgraduate researcher                                                | Audencia                                                                                     | France                                                     |
| Jacic, Ljubomir            | Professor Control systems and Automation                               | Technical College Pozarevac                                                                  | Serbia                                                     |
| Jackisch, Conrad           | Hydro-Geoecologist                                                     | Technical University Braunschweig                                                            | Germany                                                    |
| Jäckle, Sonja              | Scientist in Image Guided Therapy, Statistical Modeling                | Fraunhofer Institute for digital medicine MEVIS                                              | Germany                                                    |
| Jackson, Peter             | Atmospheric Scientist                                                  | University of Northern British Columbia                                                      | Canada                                                     |
| Jackson, Lynn              | Marine Scientist                                                       | Coastal & Environmental Consulting                                                           | South Africa                                               |
| Jackson, Mark              | Postdoctoral research fellow                                           | The University of Queensland                                                                 | Australia                                                  |
| Jackson, Stephen           | Postdoctoral Research Fellow; Microbiology                             | University College Cork                                                                      | Ireland                                                    |
| Jackson, Miriam            | Research scientist (glaciology)                                        | Norwegian water resources and energy directorate                                             | Norway                                                     |
| Jacobi, Pedro Roberto      | Senior Full Professor                                                  | University of São Paulo- Institute of Energy and Environment                                 | Brazil                                                     |
| Jacobi, Johanna            | PhD, Geography                                                         | Centre for Development and Environment, University of Bern                                   | Switzerland                                                |
| Jacobi, Hans-Werner        | Research director, Environmental science                               | Institute for Geosciences and Environmental Research (IGE); CNRS / University Grenoble Alpes | France                                                     |

|                              |                                                                         |                                                                        |                                                            |
|------------------------------|-------------------------------------------------------------------------|------------------------------------------------------------------------|------------------------------------------------------------|
| Jacoboski, Lucilene          | Post doc/Ecology                                                        | Universidade Federal do Rio Grande do Sul                              | Brazil                                                     |
| Jacobs, David                | Professor (Biology:Evolutionary Biology)                                | University of Cape Town                                                | South Africa                                               |
| Jacobs, Valentine            | PhD candidate                                                           | Université Libre de Bruxelles                                          | Belgium                                                    |
| Jacobs, Nicole               | Graduate Student Researcher                                             | University of Alaska Fairbanks                                         | United States of America (the)                             |
| jacobson, zachary            | senior mathematician                                                    | health canada                                                          | Canada                                                     |
| Jacoby, David                | Research Fellow/Marine Biology                                          | Institute of Zoology, Zoological Society of London                     | United Kingdom of Great Britain and Northern Ireland (the) |
| Jacq, Maxime                 | Biology                                                                 | Université de Montréal                                                 | Canada                                                     |
| Jacquemart, Mylène           | Graduate Student Researcher                                             | University of Colorado Boulder                                         | United States of America (the)                             |
| Jacquemin, Bertrand          | Researcher / Marine Ecology, Population Genetics and Aquaculture        | Algae Technology and Innovation Centre (CEVA)                          | France                                                     |
| Jacquemyn, Hans              | Professor                                                               | KU Leuven                                                              | Belgium                                                    |
| Jacqueot, Loic               | Phd student                                                             | Université Laval                                                       | Canada                                                     |
| jacquin, philippe            | Ingénieur d'études                                                      | INRA                                                                   | France                                                     |
| Jacquin, Lisa                | Assistant Professor in Ecology                                          | Université Toulouse 3 Paul Sabatier                                    | France                                                     |
| Jacquot, Maude               | Postdoc                                                                 | INRA                                                                   | France                                                     |
| Jactel, Herve                | Senior scientist in forest ecology and biodiversity                     | French National Institute of Agricultural Research (INRA)              | France                                                     |
| Jadot, Catherine             | Marine Biologist                                                        | ES Caribbean                                                           | United States of America (the)                             |
| Jadoul, Julie                | Laboratory technician                                                   | UCL                                                                    | Belgium                                                    |
| Jady, Beata                  | chargé de recherche                                                     | CNRS                                                                   | France                                                     |
| Jaeger, Jochen               | Associate Professor in Geography, Planning and Environment              | Concordia University, Montreal                                         | Canada                                                     |
| Jaén-Molina, Ruth            | Researcher at Molecular Biodiversity Department and Canarian DNA Bank   | Botanic Garden "Viera y Clavijo" (Cabildo de Gran Canaria)             | Spain                                                      |
| Jaenisch, Thomas             | Associate Professor                                                     | Colorado School of Public Health, Center for Global Health             | United States of America (the)                             |
| Jager, Wander                | Managing director of the Groningen Center for Social Complexity Studies | University of Groningen                                                | Netherlands (the)                                          |
| Jäger, Lucas                 | Biology                                                                 |                                                                        | Germany                                                    |
| Jagoe, Charles               | Professor of Environmental Science                                      | Florida A&M University                                                 | United States of America (the)                             |
| Jagusztyń-Krynicka, Elżbieta | professor                                                               | University of Warsaw                                                   | Poland                                                     |
| Jahnke, Knud                 | Staff astronomer                                                        | Max Planck Institute for Astronomy                                     | Germany                                                    |
| Jaillard, Etienne            | Senior scientist                                                        | Institut de Recherche pour le Développement (IRD)                      | France                                                     |
| Jain, Nandini                | General Practitioner                                                    |                                                                        | Germany                                                    |
| Jairam-Doerga, Sabitrie      | researcher                                                              | Anton de Kom University of Suriname                                    | Suriname                                                   |
| Jakobsson, Elizabeth         | Limnology                                                               | University of Uppsala                                                  | Sweden                                                     |
| Jamali, Sara                 |                                                                         | CNRS                                                                   | France                                                     |
| Jamelli, Davi                | PhD student                                                             | Universidade Federal de Pernambuco (UFPE) - Recife, PE, Brazil         | Brazil                                                     |
| James, Rebecca               | PhD Candidate                                                           | Royal Netherlands Institute for Sea Research   University of Groningen | Netherlands (the)                                          |

|                             |                                                                  |                                                                   |                                |
|-----------------------------|------------------------------------------------------------------|-------------------------------------------------------------------|--------------------------------|
| James, Alex                 | Mathematical modeller                                            | University of Canterbury                                          | New Zealand                    |
| JAMET, Jean-Louis           | Professor                                                        | Université de Toulon - Laboratoire MIO UM 110                     | France                         |
| Janakaraj, Dr Murali        | Director (Discipline - Ecology and Environmental Sciences)       | Innovotek Private Limited, India                                  | India                          |
| Jandt, Jennifer             | Senior Lecturer                                                  | University of Otago                                               | New Zealand                    |
| JANEAU, Jean Louis          | Hydro-ecology                                                    | IRD                                                               | France                         |
| Janel, Sébastien            | Research engineer biophysics                                     | CNRS                                                              | France                         |
| Janes, Michael              | Cell Biologist                                                   |                                                                   | United States of America (the) |
| Janes, Morgan               | Marine biology                                                   | Oregon Institute of Marine Biology, University of Oregon          | United States of America (the) |
| Jänicke, Martin             | Prof. Political Science                                          | IASS, Free University of Berlin                                   | Germany                        |
| Janisch, Judith             | PhD behavioral biology                                           |                                                                   | Austria                        |
| Jankovic, Jasna             | Assistant Professor                                              | University of Connecticut                                         | United States of America (the) |
| Jankowsky, Mayra            | PhD                                                              |                                                                   | Brazil                         |
| Janse van Rensburg, Lomarie | Honours student Entomology                                       | University of Pretoria                                            | South Africa                   |
| Jansen, Patrick             | Associate professor of ecology                                   | Wageningen University                                             | Netherlands (the)              |
| Jansen, Steven              | Prof. Dr., Plant Scientist                                       | Ulm University                                                    | Germany                        |
| Jansen, Boris               | Associate Professor of Soil Chemistry                            | University of Amsterdam                                           | Netherlands (the)              |
| Jansen, henk                | Landscape-ecologist                                              | Buro Elodea                                                       | Netherlands (the)              |
| Jansen, Stefan              | Global Mental Health                                             | University of Rwanda                                              | Rwanda                         |
| Jansen, Hannah              | Project Coordinator, sustainability economics/coastal governance | Leibniz Center for Tropical Marine Research (ZMT)                 | Germany                        |
| Jansen, Marcel              | Professor Plant Biology                                          | University College Cork                                           | Ireland                        |
| Jansen-van Vuuren, Ross     | Postdoctoral Research Fellow                                     | Queen's University                                                | Canada                         |
| Jansman, Hugh               | Wildlife ecologist                                               | Wageningen environmental research                                 | Netherlands (the)              |
| Janson, Charles             | Professor, Biology                                               | The University of Montana                                         | United States of America (the) |
| Janssen, Arne               | Associate professor                                              | University of Amsterdam                                           | Netherlands (the)              |
| Janssen, Luis               | PhD student Molecular Biology                                    | University of Brasília                                            | Brazil                         |
| Janssen, Philippe           | Post-Doc Ecology                                                 | IRSTEA                                                            | France                         |
| Janssens, Ivan              | Biologe professor                                                | Antwerp University                                                | Belgium                        |
| Janssens, Julie             | Hydrochemist, sea ice biogeochemist                              |                                                                   | Australia                      |
| Janssens, Lizanne           | postdoctoral researcher                                          | KU Leuven                                                         | Belgium                        |
| Jansson, Johan              | Associate Professor Sustainability Marketing                     | Lund University                                                   | Sweden                         |
| Jansson, Janet              | Chief Scientist, Emeritus                                        | Retired                                                           | United States of America (the) |
| Jantke, Kerstin             | Postdoctoral Researcher in Conservation Biology                  | University of Hamburg                                             | Germany                        |
| Januchta-Szostak, Anna      | Assoc. Prof. D.Sc. Ph.D. Arch. / Architecture and urban planning | Department of Architecture at the Poznan University of Technology | Poland                         |
| Janus, Thorsten             | Associate Professor of Economics                                 | University of Wyoming                                             | United States of America (the) |
| Janus, Michal               | Psychology                                                       | PZU                                                               | Poland                         |
| Janzen, Thijs               | Postdoc                                                          | University of Groningen                                           | Netherlands (the)              |
| Janzen, Fredric             | Professor of Ecology, Evolution, & Organismal Biology            | Iowa State University                                             | United States of America (the) |

|                          |                                                        |                                                                        |                                                            |
|--------------------------|--------------------------------------------------------|------------------------------------------------------------------------|------------------------------------------------------------|
| Janzen, Daniel           | Professor of Conservation Biology                      | University of Pennsylvania                                             | United States of America (the)                             |
| Jarau, Stefan            | Professor                                              | University College for Teacher Education Vorarlberg                    | Austria                                                    |
| Jarauta-Arabi, Alexandre | Postdoctoral fellow, Mechanical Engineering            | University of Alberta                                                  | Canada                                                     |
| Jarčuška, Benjamín       | senior researcher/ecology                              | Slovak Academy of Sciences - Institute of Forest Ecology               | Slovakia                                                   |
| Jardillier, Ludwig       | Professor in Ecology                                   | Université Paris-Sud                                                   | France                                                     |
| Jarfors, AndersE. W.     | Professor / materials and Manufacturing                | Jönköping University                                                   | Sweden                                                     |
| Jarke-Neuert, Johannes   | Research Associate                                     | Universität Hamburg                                                    | Germany                                                    |
| Jaroszewicz, Bogdan      | Associate Professor / Biology                          | Faculty of Biology, University of Warsaw                               | Poland                                                     |
| Jarraya, Marion          | Associate professor Population Biology                 | university of Perpignan                                                | France                                                     |
| Järvensivu, Paavo        | Researcher, D.Sc. (Econ.)                              | BIOS Research Unit                                                     | Finland                                                    |
| Jarvis, Jessie           | Assistant Professor                                    | University of North Carolina Wilmington                                | United States of America (the)                             |
| Jarvis, Rachel           | Wildlife conservation, primatologist                   |                                                                        | United Kingdom of Great Britain and Northern Ireland (the) |
| Jarvis, Karl             | Lecturer                                               | Southern Utah University                                               | United States of America (the)                             |
| Jashimuddin, Mohammed    | Professor                                              | University of Chittagong                                               | Bangladesh                                                 |
| Jasper, William          | Fisheries Biology - Field Biologist                    | International Pacific Halibut Commission                               | United States of America (the)                             |
| Jasperse, iapi           | Statistics Adviser and Scientific Publisher            | Tokelau National Statistics Office                                     | Tokelau                                                    |
| Jassby, Alan             | Research Ecologist Emeritus                            | University of California at Davis                                      | United States of America (the)                             |
| Jattiot, Romain          | Geology                                                |                                                                        | France                                                     |
| Jaudzims, Susanne        | Researcher                                             | German Centre for Higher Education Research and Science Studies (DZHW) | Germany                                                    |
| Jaugeon, Baptiste        | Fishery scientist                                      | DSA Wallis et Futuna                                                   | Wallis and Futuna                                          |
| Jauhiainen, Jyrki        | Researcher                                             | Department of Forest Sciences/ University of Helsinki                  | Finland                                                    |
| Jaunatre, Renaud         | Researcher in Restoration Ecology                      | Irstea                                                                 | France                                                     |
| Javal, Marion            | PostDoctoral Researcher                                | Stellenbosch University                                                | South Africa                                               |
| Javed, S. A.             | Asst. Prof.                                            | Nanjing University of Information Science and Technology               | China                                                      |
| Javerzat, Sophie         | Professor of Genetics                                  | University of Bordeaux Inserm                                          | France                                                     |
| Javerzat, Jean-Paul      | Scientist / Molecular Biology                          | CNRS                                                                   | France                                                     |
| Javier, Grosfeld         | Biologist                                              | CONICET                                                                | Argentina                                                  |
| Jaworski, Coline         | AXA Postdoctoral Fellow                                | Aix-Marseille Université / University of Oxford                        | France                                                     |
| Jax, Elinor              | Postdoctoral researcher in biology                     | Max Planck Institute for Ornithology                                   | Germany                                                    |
| Jay, Sylvain             | Post doctoral research fellow                          | INRA                                                                   | France                                                     |
| Jayaraman, Jay           | Post-doctoral Scientist                                | Plant and Food Research                                                | New Zealand                                                |
| Jayne, Kimberley         | Senior Science Researcher / Doctor of Animal Behaviour | Animal Defenders International                                         | United Kingdom of Great Britain and Northern Ireland (the) |
| Jbenyeni, Adam           | PhD Student, DVM                                       | ENVT                                                                   | France                                                     |
| Jeal, Corey              | Conservation biology                                   | NGO                                                                    | Zambia                                                     |
| Jean, Kévin              | Lecturer in Epidemiology                               | Conservatoire national des Arts et Métiers                             | France                                                     |
| JEAN, Frédéric           | assistant engineer in forest ecology                   | INRA                                                                   | France                                                     |
| JEAN, Frederic           | Pr Marine Ecology                                      | Université de Brest / IUEM                                             | France                                                     |

|                            |                                                                          |                                                        |                                                            |
|----------------------------|--------------------------------------------------------------------------|--------------------------------------------------------|------------------------------------------------------------|
| Jean Philippe, Tonneau     | geograph                                                                 | CIRAD                                                  | France                                                     |
| Jean-Louis, Charli         | Research Professor                                                       | Universidad Nacional Autonoma de Mexico                | Mexico                                                     |
| JEAN-MAX, NOYER            | PROFESSOR EMERITUS OF UNIVERSITY                                         | university Marseille -Toulon                           | France                                                     |
| Jeanene, Jeanene           | Community development                                                    |                                                        | South Africa                                               |
| Jeanneau, Laurent          | Organic Geochemistry                                                     | CNRS                                                   | France                                                     |
| Jeanniard du Dot, Tiphaine | Research Scientist, Marine Biology and Ecology                           | Centre National de la Recherche Scientifique France    | France                                                     |
| Jeantet, Lorène            | Phd Student                                                              | CNRS                                                   | France                                                     |
| Jeffreys, Rachel           | Marine biologist                                                         | University of liverpool                                | United Kingdom of Great Britain and Northern Ireland (the) |
| Jeffries, Daniel           | Postdoctoral researcher                                                  | University of Lausanne                                 | Switzerland                                                |
| Jégou, Laurent             | Maître de conférences en géographie                                      | Université de Toulouse-2 Jean Jaurès                   | France                                                     |
| Jégou, Anne                | Assistant Profesor - Geography                                           | University of Burgundy                                 | France                                                     |
| Jeleapov, Ana              | researcher, geography                                                    | Institute of Ecology and Geography                     | Moldova (the Republic of)                                  |
| Jemmett, Anna              | PhD student- Conservation biology                                        | University of Kent/Institute of Zoology-ZSL            | United Kingdom of Great Britain and Northern Ireland (the) |
| Jenicek, Michal            | Researcher, hydrology                                                    | Charles University, Prague                             | Czech Republic (the)                                       |
| Jenkins, Alastair          | Visiting scientist, Geophysical Institute                                | University of Bergen                                   | Norway                                                     |
| Jenkins, Holly             | PhD Research Student - marine biogeochemistry                            | University of Southampton                              | United Kingdom of Great Britain and Northern Ireland (the) |
| Jenkins, David             | Professor, Department of Nutritional Sciences and Department of Medicine | University of Toronto                                  | Canada                                                     |
| Jenkins, Stephen           | Professor of Biology Emeritus                                            | University of Nevada, Reno                             | United States of America (the)                             |
| Jenkinson, Ian             | Researcher in oceanography                                               | Agency for Consultation and Research in Oceanography   | France                                                     |
| Jenner, Emma               | Strategic Planning and Operations Manager                                | CABI                                                   | Switzerland                                                |
| Jennings, Michael          | Ecologist specializing in biotic responses to climate change             | University of Idaho; Retired, U.S. Forest Service      | United States of America (the)                             |
| Jennings, Patricia         | Professor of Education                                                   | University of Virginia                                 | United States of America (the)                             |
| Jennings, Richard          | Senior Lecturer in Archaeology                                           | Liverpool John Moores University                       | United Kingdom of Great Britain and Northern Ireland (the) |
| Jennings, W. Bryan         | Research Scientist/Ecology and Evolutionary Biology                      | Museu Nacional, Universidade Federal do Rio de Janeiro | Brazil                                                     |
| Jennions, Michael          | Professor in Biology                                                     | Australian National University                         | Australia                                                  |
| Jenny, Jean-Philippe       | Researcher                                                               | INRA - national institute for agricultural research    | France                                                     |
| Jensen, Marlene Mark       | Senior Researcher                                                        | Technical University of Denmark                        | Denmark                                                    |
| Jensen, Frants             | Marine Biologist                                                         | Woods Hole Oceanographic Institution                   | United States of America (the)                             |
| Jentsch, Anke              | Professor of Disturbanc Ecology                                          | University of Bayreuth                                 | Germany                                                    |
| Jephcott, Freya            | Research fellow in emerging infectious diseases                          | University of Cambridge                                | United Kingdom of Great Britain and Northern Ireland (the) |
| Jeppesen, Erik             | Professor;DSc                                                            | Aarhus University                                      | Denmark                                                    |
| Jepsen, Jane Uhd           | Senior researcher, Ecology                                               | NINA                                                   | Norway                                                     |
| Jepsen, Emma               | MSc Zoology Candidate                                                    | University of Pretoria                                 | South Africa                                               |

|                                   |                                                               |                                                                                                              |                                                            |
|-----------------------------------|---------------------------------------------------------------|--------------------------------------------------------------------------------------------------------------|------------------------------------------------------------|
| Jeran, Matevž                     | Master of nutrition (MSc.)                                    |                                                                                                              | Slovenia                                                   |
| Jeschke, Alina                    | PhD student Evolutionary Genetics                             | Max Planck Institute for Evolutionary Biology                                                                | Germany                                                    |
| Jesse, Wendy                      | PhD Candidate Animal Ecology                                  | Vrije Universiteit Amsterdam                                                                                 | Netherlands (the)                                          |
| Jessen, Lasse                     | Phd student                                                   | University of Copenhagen                                                                                     | Denmark                                                    |
| Jessen, Maria-Theresa             | PhD student in Ecology                                        | Helmholtz Centre for Environmental Research (UFZ)/German Centre for Integrative Biodiversity Research (iDiv) | Germany                                                    |
| Jessie, William                   |                                                               | Oregon State University                                                                                      | United States of America (the)                             |
| Jesson, Julie                     | Post-doctoral Research Fellow, Epidemiology and Public Health | Inserm U1027, Université Toulouse III Paul Sabatier                                                          | France                                                     |
| Jessus, Catherine                 | Senior Researcher / Biology                                   | CNRS                                                                                                         | France                                                     |
| Jesus, Fátima                     | Investigator/Biology                                          | CESAM and Dept of Environment and Planning of University of Aveiro                                           | Portugal                                                   |
| Jesus Fontes, Sónia Alexandra     | Biomedical Sciences researcher                                | Leibniz Institute for Zoo and Wildlife research, Berlin, Germany                                             | Portugal                                                   |
| Jeuken, Alan                      | PhD, Synthetic Chemist                                        | CRO                                                                                                          | United Kingdom of Great Britain and Northern Ireland (the) |
| Jewell, Zoe                       | Wildlife biologist                                            | WildTrack                                                                                                    | United States of America (the)                             |
| Jewitt, Debbie                    | Conservation scientist                                        |                                                                                                              | South Africa                                               |
| Jha, Rohit                        | Research Fellow, Ecology/Wildlife biology                     | Wildlife Institute of India                                                                                  | India                                                      |
| Jhangeer-Khan, Reshad             | Marine and Terrestrial Biodiversity Conservationist           | Mauritian Wildlife Foundation                                                                                | Mauritius                                                  |
| Jiang, Mingkai                    |                                                               | Western Sydney University                                                                                    | Australia                                                  |
| Jiang, Renji                      | MSc student                                                   | University of Canterbury                                                                                     | China                                                      |
| Jiang, Leiwen                     | Senior Associate and Professor                                | Population Council and Shanghai Univesity                                                                    | China                                                      |
| Jiguet, Frédéric                  | Professor in Conservation Biology                             | Muséum National d'Histoire Naturelle, UMR7204 CESCO                                                          | France                                                     |
| Jimenez, Jaime                    | Professor, Conservation Biology                               | University of North Texas                                                                                    | United States of America (the)                             |
| Jimenez, Maria Laura              | Comerciante                                                   |                                                                                                              | Dominican Republic (the)                                   |
| Jimenez, Jose                     | Investigador                                                  | Consejo Superior de Investigaciones Cientificas                                                              | Spain                                                      |
| Jimenez, Maria Dolores            | Associate Professor, Ecology                                  | Universidad Complutense de Madrid                                                                            | Spain                                                      |
| Jimenez, Mercedes                 | scientist                                                     | CSIC                                                                                                         | Spain                                                      |
| Jiménez, Everardo                 | Master in Biology                                             | Universidad Autónoma Metropolitana Iztapalapa                                                                | Mexico                                                     |
| Jiménez, Laura                    | Postdoctoral                                                  | Univeristy of Granada. Department of Ecology                                                                 | Spain                                                      |
| Jiménez Cano, Nayeli G.           | Senior Technical Officer                                      | Universidad Autonoma de Yucataán                                                                             | Mexico                                                     |
| JIMENEZ GONZALEZ, ANTONIO ESTEBAN | RESEARCHER                                                    | UNAM                                                                                                         | Mexico                                                     |
| Jiménez Herrera, Miguel Ángel     | PhD student                                                   | Materials Physics Center                                                                                     | Spain                                                      |
| Jiménez Lalana, Diego Esteban     | PhD Student in Microbiology                                   | National Center of Biotechnologyb - Spanish National Research Council                                        | Spain                                                      |
| Jimenez Vilchez, Ricardo Jesus    | Coordinador del Programa Ambiental/ Biologo                   | Terra Nuova                                                                                                  | Peru                                                       |
| Jiménez-Domínguez, Aris           | Biologist                                                     | Instituto de Ciencias Médicas                                                                                | Panama                                                     |

|                                |                                                             |                                                                             |                                                            |
|--------------------------------|-------------------------------------------------------------|-----------------------------------------------------------------------------|------------------------------------------------------------|
| Jimenez-Guri, Eva              | Postdoctoral Researcher, Evolutionary Developmental Biology | The University of Exeter                                                    | United Kingdom of Great Britain and Northern Ireland (the) |
| Jiménez-Hidalgo, Eduardo       | Full professor                                              |                                                                             | Mexico                                                     |
| Jiménez-Jacinto, Verónica      | Academic                                                    | UNAM                                                                        | Mexico                                                     |
| Jiménez-Melero, Raquel         | Lecturer in Ecology                                         | Universidad de Jaén                                                         | Spain                                                      |
| Jiménez-Morillo, Nicasio T     | Postdoctoral Researcher                                     | University of Evora                                                         | Portugal                                                   |
| Jiménez-Morillo, Nicasio T.    | Ramón y Cajal Researcher / Biogeochemistry                  | IRNAS-CSIC                                                                  | Spain                                                      |
| JIMÉNEZ-MORILLO, NICASIO TOMÁS | Post-Doc Researcher in Biogeochemistry                      | LABORATORIO HERCULES (UNIVERSIDADE DE ÉVORA)                                | Portugal                                                   |
| Jiménez-Rodríguez, César       | Forest Hydrologist                                          | Delft University of Technology                                              | Costa Rica                                                 |
| Jiménez-Ruiz, Jesús            |                                                             | National Institute for Agricultural and Food Research and Technology (INIA) | Spain                                                      |
| Jin, Chenyu                    | Postdoctoral researcher                                     | Max Planck Institute for Dynamics and Self-Organization                     | Germany                                                    |
| Jiskoot, Hester                | Associate Professor of Physical Geography & Glaciology      | University of Lethbridge                                                    | Canada                                                     |
| Job, Dominique                 | Emeritus CNRS REsearch Director                             | CNRS                                                                        | France                                                     |
| Jobard, Gaël                   | associate professor in psychology                           | Université de Bordeaux                                                      | France                                                     |
| Jochum, Malte                  | PostDoc in Biodiversity and Ecology                         | iDiv & Leipzig University, Germany                                          | Germany                                                    |
| Joda, Aisha                    | Medical doctor                                              |                                                                             | United Kingdom of Great Britain and Northern Ireland (the) |
| Joe, Stephanie                 | Forest Pest Biologist                                       | University of Hawaii at Manoa                                               | United States of America (the)                             |
| Joel, Matthew                  | Graduate Student                                            | University of Calgary                                                       | Canada                                                     |
| Joetzjer, Emilie               | Postdoctoral Researcher                                     | CNRM/Météo-France                                                           | France                                                     |
| Joffe, Ricardo                 | PhD student                                                 | Université de Lorraine                                                      | France                                                     |
| Johansen, Tine Sköll           | Master of applied ecology                                   |                                                                             | Norway                                                     |
| Johansson, Robert              | PhD Candidate (Energy Systems)                              | University of Gävle                                                         | Sweden                                                     |
| Johns, David                   | Adjunct Professor Political Science                         | Portland State University                                                   | United States of America (the)                             |
| Johns, Mitchell                | Professor Emeritus Soil and Crop Science                    | California State Univeristy                                                 | United States of America (the)                             |
| Johns, Jennifer                | Faculty, veterinary pathology                               | Oregon State University                                                     | United States of America (the)                             |
| JOHNS, Dominic Tiatou          | Liberia REDD+ Convener                                      | Liberia REDD+ Technical Working Group                                       | Liberia                                                    |
| johnson, geoff                 | Veterinary Surgeon                                          | WHS                                                                         | United Kingdom of Great Britain and Northern Ireland (the) |
| Johnson, Robert                | Adjunct Faculty - Biology                                   | Arizona State University                                                    | United States of America (the)                             |
| Johnson, William               | PhD student - geosciences                                   | Newcastle University                                                        | United Kingdom of Great Britain and Northern Ireland (the) |
| Johnson, Rebecca               | Microbiologist                                              | Pharmaceutical Industry                                                     | Austria                                                    |
| Johnson, Richard               | Professor                                                   | Swedish University of Agricultural Sciences                                 | Sweden                                                     |
| Johnson, Shelly                | Biology                                                     | Pasadena City College                                                       | United States of America (the)                             |
| Johnson, Kira                  | Conservation Biologist                                      | Voices for Biodiversity                                                     | United States of America (the)                             |
| Johnson, H. Thomas             | Economic History                                            | Portland State University (emeritus)                                        | United States of America (the)                             |
| Johnson, Mark                  | Professor and Canada Research Chair                         | University of British Columbia                                              | Canada                                                     |

|                       |                                                        |                                                        |                                                            |
|-----------------------|--------------------------------------------------------|--------------------------------------------------------|------------------------------------------------------------|
| Johnson, Malcolm      | Watershed Manager                                      | The Bureau of Environmental and Coastal Quality (BECQ) | Northern Mariana Islands (the)                             |
| Johnson, Erik         | PhD student - Astrophysics                             | Georg-August Universität Göttingen                     | Germany                                                    |
| Johnson, Raymond      | Chemist/Director Institute of Climate Studies          | NFP                                                    | United States of America (the)                             |
| Johnson, Douglas H    | Statistician                                           | University of Minnesota                                | United States of America (the)                             |
| Johnson, Peter        | Research Assistant Agricultural Science                | Tasmanian Institute of Agriculture                     | Australia                                                  |
| Johnson, Claire       | Life Sciences                                          | EMBL-EBI                                               | United Kingdom of Great Britain and Northern Ireland (the) |
| Johnson, Mark         | Prof. / Microbial Ecologist                            | University of St. Joseph                               | United States of America (the)                             |
| Johnston, Adam        | Professor of Physics                                   | Weber State University                                 | United States of America (the)                             |
| Johnston, Alice       | Research Fellow / Ecology                              | University of Reading                                  | United Kingdom of Great Britain and Northern Ireland (the) |
| Johnston, Theresa     | Environmental toxicology                               | Loyola University Chicago                              | United States of America (the)                             |
| Johnston, Scott       | Professor Earth Science                                | Southern Cross University                              | Australia                                                  |
| Johnston, Lynn        | Forest Fire Research Specialist                        | Natural Resources Canada, Canadian Forest Service      | Canada                                                     |
| Johnstone, Jill       | Adjunct Professor of Biology                           | University of Saskatchewan                             | Canada                                                     |
| Jola, Simone          | Research assisntent                                    | WSL                                                    | Switzerland                                                |
| Joly, Etienne         | Research Scientist in biology                          | INSERM, France                                         | France                                                     |
| Joly, François-Xavier | Soil Ecologist                                         | University of Stirling                                 | United Kingdom of Great Britain and Northern Ireland (the) |
| Joly, Mona            | PhD in social science                                  | WZB                                                    | Germany                                                    |
| JOLY, Carlos Alfredo  | Professor of Ecology                                   | University of Campinas/UNICAMP                         | Brazil                                                     |
| Jonas Levi, Adi       | Lecturer & Researcher                                  | Tel Hai College                                        | Israel                                                     |
| Jonckheere, Inge      | Lead Author                                            | IPCC                                                   | Belgium                                                    |
| Jones, David          | Entomologist                                           | Natural History Museum, London                         | United Kingdom of Great Britain and Northern Ireland (the) |
| Jones, Loretta        | Emeritus Professor of Chemistry                        | University of Northern Colorado                        | United States of America (the)                             |
| Jones, Robert         | Glaciology                                             |                                                        | United Kingdom of Great Britain and Northern Ireland (the) |
| Jones, Morgan         | PhD student                                            | Francis Crick Institute                                | United Kingdom of Great Britain and Northern Ireland (the) |
| Jones, Holly          | Associate Professor                                    | Northern Illinois University                           | United States of America (the)                             |
| Jones, Cynthia        | Professor                                              | University of Connecticut                              | United States of America (the)                             |
| Jones, Roger          | Professorial Research Fellow, Climate risk             | Victoria University                                    | Australia                                                  |
| Jones, Samuel         | PhD researcher                                         | Royal Holloway, University of London                   | United Kingdom of Great Britain and Northern Ireland (the) |
| Jones, Sarah          | Associate Scientist, Farms, Fields and Landscapes Team | Bioversity International                               | France                                                     |
| Jones, Rhiannon       | Chemistry teacher                                      | Lakelands Academy                                      | United Kingdom of Great Britain and Northern Ireland (the) |
| Jones, Mark           | Veterinarian and wildlife conservationist              |                                                        | United Kingdom of Great Britain and Northern Ireland (the) |
| Jones, Robert         | Professor                                              | Universidad Autónoma de Querétaro                      | Mexico                                                     |



|                             |                                                                |                                                                 |                                                            |
|-----------------------------|----------------------------------------------------------------|-----------------------------------------------------------------|------------------------------------------------------------|
| Jones, Lizzie               | PhD Student Conservation Ecology                               | Institute of Zoology, London                                    | United Kingdom of Great Britain and Northern Ireland (the) |
| Jones, Andy                 | Associate Professor                                            | Oregon State University                                         | United States of America (the)                             |
| Jones, Harrison             | PhD Candidate                                                  | University of Florida                                           | United States of America (the)                             |
| Jones, Hefin                | Senior Lecturer - ecological entomology                        | Prifysgol Caerdydd / Cardiff University                         | United Kingdom of Great Britain and Northern Ireland (the) |
| Jones, Alan                 | Senior Fellow, Ecologist                                       | Australian Museum                                               | Australia                                                  |
| Jones, Auriane              | Lecturer in marine biology and ecology                         | Agrocampus Ouest                                                | France                                                     |
| Jones, Christopher          | Marine Ornithology                                             | Independent Researcher                                          | South Africa                                               |
| Jones, Hannah               | Researcher                                                     | University of Liverpool                                         | United Kingdom of Great Britain and Northern Ireland (the) |
| Jones, Gregory              | Director, Center for Wine Education                            | Linfield College                                                | United States of America (the)                             |
| Jones, Melanie              | Professor of Biology                                           | University of British Columbia Okanagan campus                  | Canada                                                     |
| Jones, Richard              | Emeritus Professor of Polymer Science                          | University of Kent, Canterbury                                  | United Kingdom of Great Britain and Northern Ireland (the) |
| Jones, Graham               | Earth Systems Science (Adjunct Associate Professor)            | Southern Cross University                                       | Australia                                                  |
| Jones, Stephanie            | Ornithologist                                                  | US Fish and Wildlife Service                                    | United States of America (the)                             |
| jonker, marlotte            | phd student                                                    | uni freiburg                                                    | Germany                                                    |
| Jonker, Anneke              | retired biologist                                              |                                                                 | Netherlands (the)                                          |
| Jónsdóttir, Ingibjörg Svala | Professor of Ecology                                           | University of Iceland                                           | Iceland                                                    |
| Jordan, Neil                | Lecturer (Conservation Ecology)                                | University of New South Wales                                   | Australia                                                  |
| Jordan, Ferenc              | biologist                                                      | MTA Centre for Ecological Research                              | Hungary                                                    |
| Jordan, Ulrike              | Professor, Thermal Engineering                                 | University of Kassel                                            | Germany                                                    |
| Jordan, Asia                | Research Assistant                                             | University College Dublin                                       | Ireland                                                    |
| Jordan, David               | Lecturer, Soil Physics                                         | LJMU                                                            | United Kingdom of Great Britain and Northern Ireland (the) |
| Jordano, Diego              | Professor / Ecology                                            | Faculty of Sciences, University of Cordoba                      | Spain                                                      |
| Jordano, Pedro              | Research Professor Ecology                                     | Consejo Superior de Investigaciones Científicas                 | Spain                                                      |
| Jorge, Rafael               | PhD Candidate in Ecology                                       | National Institute of Amazon Researches                         | Brazil                                                     |
| JORGE, Rodrigo              | Coordinator                                                    | Intituto Chico Mendes de Conservação da Biodiversidade - ICMBio | Brazil                                                     |
| Jørgensbye, Helle           | PhD Marine Biology                                             |                                                                 | Denmark                                                    |
| Jorgensen, Bethany          | PhD Candidate, Natural Resources                               | Cornell University                                              | United States of America (the)                             |
| Jorgensen, Jesper           | Independent scientist                                          | NCIS                                                            | Denmark                                                    |
| Jorgensen, Julia C.         | Experimental Cognitive Psychology                              | Retired                                                         | United States of America (the)                             |
| Jörgensen, Svea             | Doctoral student in Animal Ethics, DVM                         | Swedish University of Agricultural Sciences                     | Sweden                                                     |
| Jorgenson, Andrew           | Professor of Environmental Studies and Environmental Sociology | Boston College                                                  | United States of America (the)                             |
| Jorna, Jesse                | PhD Candidate in Biology                                       | Brigham Young University                                        | United States of America (the)                             |
| Joseph, Jacques             | Postdoc                                                        | Faculty of Science, Charles University Prague                   | Czech Republic (the)                                       |
| Joseph, Matthieu            | PhD surfent in mathematics                                     | ENS de Lyon                                                     | France                                                     |
| JOSEPH, Philippe            | Profesor                                                       | UMR ESPACE DEV -University oh French West indies                | Martinique                                                 |

|                             |                                                                                 |                                                                                                                                                |                                |
|-----------------------------|---------------------------------------------------------------------------------|------------------------------------------------------------------------------------------------------------------------------------------------|--------------------------------|
| Josephs-Spaulding, Jonathan | Systems Biology                                                                 | Institute of Experimental Medicine                                                                                                             | Germany                        |
| Joshi, Sharad P.            | Cryosphere Analyst                                                              | International Centre for Integrated Mountain Development (ICIMOD)                                                                              | Nepal                          |
| Joshi, Aditya               | Wildlife Biologist                                                              |                                                                                                                                                | India                          |
| Joshi, Jasmin               | Prof. Landscape Ecology                                                         | HSR Hochschule fuer Technik Rapperswil, Institute for Landscape and Open Space                                                                 | Switzerland                    |
| Josiah, Kyrone              | Ecology                                                                         | University of KwaZulu-Natal                                                                                                                    | South Africa                   |
| Jost, Francois              | Postdoctoral Researcher in Climate Change                                       | Royal Roads University                                                                                                                         | Canada                         |
| Jouglin, Maggy              | biology engineer                                                                | Institut National de Recherche Agronomique                                                                                                     | France                         |
| JOURDAN, Hervé              | Research Scientist / Ecology and biological invasions                           | IRD, French National research Institute for Sustainable Development, UMR 237 IMBE                                                              | New Caledonia                  |
| JOURDAN, Clément            | PhD student in Ecology                                                          | CNRS / LIENSs Institute                                                                                                                        | France                         |
| Jourdan-Pineau, Hélène      | Evolutionary Ecology                                                            | CIRAD                                                                                                                                          | France                         |
| Journé, Valentin            | PhD Student                                                                     | INRA                                                                                                                                           | France                         |
| Journet, Alan               | Professor emeritus                                                              | Southeast Missouri State University                                                                                                            | United States of America (the) |
| Journet, Etienne-Pascal     | Senior scientist - Agronomy, Plant biology                                      | CNRS and INRAE                                                                                                                                 | France                         |
| Jouve, Bertrand             | Senior researcher - mathematics                                                 | CNRS                                                                                                                                           | France                         |
| Joux, Fabien                | Associate Professor, Marine microbial ecology                                   | Microbial Oceanography Laboratory, Sorbonne University, CNRS                                                                                   | France                         |
| Jouzel, Jean                | Scientist (Emeritus)                                                            | LSCE/IPSL                                                                                                                                      | France                         |
| Jowers, Michael Joseph      | Postdoctoral Researcher/Evolutionary Genetics                                   | CIBIO/InBIO, Centro de Investigação em Biodiversidade e Recursos Genéticos, Universidade do Porto. Campus de Vairão, 4485-661 Vairão, Portugal | Portugal                       |
| Joy, Mike                   | Ecologist                                                                       | Victoria University                                                                                                                            | New Zealand                    |
| Joye, Patrick               | Phd Student, Evolutionary Biology                                               | Lausanne University                                                                                                                            | Switzerland                    |
| Joye, Samantha              | Oceanography                                                                    | University of Georgia                                                                                                                          | United States of America (the) |
| Juarez, Julio               | Senior Chemist                                                                  | AMSA                                                                                                                                           | Guatemala                      |
| Juárez Núñez, Apolonio      | Responsable del Centro de Estudios en Energía Ambiente y Cambio Climático, BUAP | Benemérita Universidad Autónoma de Puebla                                                                                                      | Mexico                         |
| juarranz, angeles           | Professor of Cell Biology                                                       | Universidad Autonoma de Madrid                                                                                                                 | Spain                          |
| Juarranz, Yasmina           | University Profesor                                                             | Universidad Complutense de Madrid                                                                                                              | Spain                          |
| Judd, Louise                | Laboratory Manager Bacterial Genomics                                           | Monash University                                                                                                                              | Australia                      |
| Jüdes, Ulrich Dr.           | Retired                                                                         | University of Kiel                                                                                                                             | Germany                        |
| Juez, Oscar                 | PhD student                                                                     | Max Planck Institute for Molecular Genetics                                                                                                    | Germany                        |
| Juhi, Zakia                 | Coral Reef Ecologist                                                            | University of Science, Malaysia                                                                                                                | Bangladesh                     |
| Julich, Stefan              | Researcher, Soil Science                                                        | Institute of Soil Science and Site Ecology, TU Dresden                                                                                         | Germany                        |
| Julien, Jean-Francois       | Senior Scientist Ecology                                                        | C.N.R.S. & Museum National d'Histoire Naturelle                                                                                                | France                         |
| Julieta, Carilla            | Researcher - Ecology                                                            | CONICET                                                                                                                                        | Argentina                      |
| Jüling, André               | Physical Oceanography                                                           | Institute for Marine and Atmospheric research Utrecht                                                                                          | Netherlands (the)              |
| Jumman, Ashiel              | Agricultural Engineer                                                           | South African Sugarcane Research Institute                                                                                                     | South Africa                   |
| Jumtow, Jasmin              | Health promoter / Health sciences                                               | Federal Health insurance in Germany                                                                                                            | Germany                        |

|                       |                                                                        |                                                                      |                                        |
|-----------------------|------------------------------------------------------------------------|----------------------------------------------------------------------|----------------------------------------|
| Junaedi, Decky        | Ecologist (Invasion ecology and plant conservation)                    | Cibodas Botanical Garden - Indonesian Institute of Sciences (LIPI)   | Indonesia                              |
| Jung, Sascha          | PD Dr. rer. nat. Dipl.-Ing. Biochemistry and Biotechnology             | Technische Universität Berlin                                        | Germany                                |
| Jung, Patrick         | PostDoc, Botany                                                        | TU Kaiserslautern                                                    | Germany                                |
| Jung, Jean-Luc        | Senior scientist                                                       | Université de Brest                                                  | France                                 |
| Jungbluth, Christian  | Prof. Dr.-Ing.                                                         | FH Aachen University of Applied Sciences                             | Germany                                |
| Junker, Jessica       | Postdoc, conservation biology, primates, large mammals                 | Max Planck Institute for Evolutionary Anthropology                   | Germany                                |
| Junker-Frohn, Laura   | Postdoc Plant Biology                                                  | Forschungszentrum Jülich GmbH                                        | Germany                                |
| Junoy, Juan           | Professor                                                              | Universidad de Alcalá                                                | Spain                                  |
| Junquas, Clementine   | Researcher                                                             | IGE/IRD                                                              | France                                 |
| Junqueira, Andre      | Postdoctoral researcher                                                | Universitat Autònoma de Barcelona                                    | Spain                                  |
| Jupiter, Stacy        | Melanesia Regional Director                                            | Wildlife Conservation Society                                        | Fiji                                   |
| Juras, Roman          | Postdoc in Hydrology                                                   | Czech University of Life Sciences Prague                             | Czech Republic (the)                   |
| Jurasinski, Gerald    | Associate Professor, Landscape Ecology                                 | University of Rostock                                                | Germany                                |
| Juretić, Davor        | Professor Emeritus and scientific adviser/ physics biophysics          | Mediterranean Institute for Life Sciences                            | Croatia                                |
| Jurgensen, Arnd       | lecturer, Political Science                                            | University of Toronto                                                | Canada                                 |
| Jury, Steven          | Professor of Biology                                                   | Saint Joseph's College of Maine                                      | United States of America (the)         |
| Jusik, Szymon         | Assistant Professor, environmental engineering                         | Poznan University of Life Sciences                                   | Poland                                 |
| Juste, Javier         | Assistant Professor                                                    | Doñana Biological Station (CSIC)                                     | Spain                                  |
| Justel, Ana           | Associate Professor in Statistics                                      | Universidad Autónoma de Madrid                                       | Spain                                  |
| Juszczak, Radosław    | Professor                                                              | Poznan University of Life Sciences                                   | Poland                                 |
| Juteau, Christy       | Registered Professional Biologist                                      |                                                                      | Canada                                 |
| Jüttler, Andreas      | Academic Staff Member at the Chair of Business and Economics Education | University of Konstanz                                               | Germany                                |
| Juvany Canovas, Laura | PhD Conservation Biology                                               | SLU Swedish University of Agricultural Sciences                      | Sweden                                 |
| Juvinyà, Carla        | Ecology PhD Candidate                                                  | CTFC                                                                 | Spain                                  |
| K, Yoganand           | Wildlife conservation                                                  |                                                                      | Lao People's Democratic Republic (the) |
| K, Raja               | Scientist                                                              | Dharmavana Nature Ark                                                | India                                  |
| Kaack, Lucian         | PhD student; Biology                                                   | Ulm University                                                       | Germany                                |
| Kaandorp, M.Y.        |                                                                        | NIOO-KNAW                                                            | Netherlands (the)                      |
| Kaaronen, Roope       | Doctoral Candidate, Environmental Policy                               | University of Helsinki, Helsinki Institute of Sustainability Science | Finland                                |
| Kaasik, Marko         | Senior researcher of air pollution modelling                           | Institute of Physics, University of Tartu                            | Estonia                                |
| Kaasik, Helle         | researcher / physics, religious studies                                | University of Tartu                                                  | Estonia                                |
| Kabanshi, Alan        | Associate professor of energy systems                                  | University of Gävle                                                  | Sweden                                 |
| kabasakal, bekir      | post-doc researcher                                                    | akdeniz university                                                   | Turkey                                 |
| Kabdebon, Claire      | Postdoctoral fellow                                                    | Yale University                                                      | United States of America (the)         |
| Kaczanowski, Andrzej  | Professor emeritus , Biology                                           | Faculty of Biology, Warsaw University                                | Poland                                 |

|                       |                                                              |                                                                           |                                |
|-----------------------|--------------------------------------------------------------|---------------------------------------------------------------------------|--------------------------------|
| Kaczmarek, Nicolas    | PhD student                                                  | Evolutionary Biology & Ecology                                            | Belgium                        |
| Kadej, Marcin         | University Professor/biology                                 | University of Wroclaw, Faculty of Biological Sciences                     | Poland                         |
| Kagansky, Alexander   | Scientist, molecular medicine                                | Far Eastern Federal University                                            | Russian Federation (the)       |
| Kagumba, Robert       | Assistant professor of biology and science education         | DELTA STATE UNIVERSITY                                                    | United States of America (the) |
| Kahanamoku, Sara      | PhD Candidate                                                | University of California, Berkeley                                        | United States of America (the) |
| Kahle, Emma           | Paleoclimate                                                 | University of Washington                                                  | United States of America (the) |
| Kahlke, Tim           | Postdoctoral Research Associate, Bioinformatics/Genetics     | Climate Change Cluster, University of Technology Sydney, Australia        | Australia                      |
| Kahnt, Belinda        |                                                              | MLU Halle                                                                 | Germany                        |
| Kainu, Annina         | Economist                                                    |                                                                           | Finland                        |
| Kainz, Martin         | Research Scientist                                           | WasserCluster Lunz                                                        | Austria                        |
| Kaiser, Aurélien      | PhD Student                                                  | UCLouvain                                                                 | Belgium                        |
| Kaiser, Vanessa       | Healthcare Researcher/Psychologist                           | University Medical Center Freiburg - SEVERA                               | Germany                        |
| Kaiser, Sara          | Research Ecologist                                           | Cornell Lab of Ornithology                                                | United States of America (the) |
| Kaiser, Mathsi        | Neuroscience                                                 | Charité Berlin                                                            | Germany                        |
| Kaissling, Karl-Ernst | Biologist, Emeritus                                          | Max-Planck-Society                                                        | Germany                        |
| Kajee, Mohammed       | MSc candidate                                                | University of Cape Town                                                   | South Africa                   |
| Kajzer-Bonk, Joanna   | PhD / Biologist                                              | Institute of Nature Conservation Polish Academy of Sciences               | Poland                         |
| Kakati, Kashmira      | Wildlife Biology                                             |                                                                           | India                          |
| Kakouei, Karan        | Postdoctoral researcher                                      | Leibniz Institute of Freshwater Ecology and Inland Fisheries (IGB)        | Germany                        |
| Kalapala, Babu Rao    | Former Chief Scientist                                       | Indian Institute of Chemical Technology, Hyderabad                        | India                          |
| Kalayil, Sissy        | Postdoctoral Fellow in Biochemistry                          | European Molecular Biology Laboratory Grenoble                            | France                         |
| Kalbe, Johannes       | Researcher in Palaeoecology/Forest Ecology/Landscape Ecology | University of Rostock                                                     | Germany                        |
| KALBOUSSI, Mohsen     | Assistant professor in Animal Ecology                        | Institut Supérieur Agronomique de Chat Mariam                             | Tunisia                        |
| Kalén, Ola            | Oceanographer                                                | Swedish Meteorological and Hydrological Institute                         | Sweden                         |
| KALINOWSKA, ANNA      | Dr, Ecologist- Zoologist, Sustainable Development            | The University of Warsaw                                                  | Poland                         |
| Kalitzkus, Vera       | Senior Researcher, medical anthropologist                    | Institute of General Practice, Medical Faculty, University of Duesseldorf | Germany                        |
| Källander, Hans       | Ecologist. retired                                           | Dept of Biology                                                           | Sweden                         |
| Kallioinen, Petter    | Technician and phd student in cognitive neuroscience         | Stockholm University                                                      | Sweden                         |
| Kallsen, Jan          | Professor / Mathematics                                      | Kiel University                                                           | Germany                        |
| Källström, Björn      |                                                              | Gothenburg Marine Biological Laboratory                                   | Sweden                         |
| Kalmus, Peter         | Data Scientist                                               | Jet Propulsion Laboratory                                                 | United States of America (the) |
| KALOTERAKIS, NIKOLAOS | MSc Student                                                  | Wageningen University/NIOO KNAW                                           | Greece                         |
| Kaltenpoth, Martin    | Professor, Evolutionary Ecology                              | Johannes Gutenberg University Mainz                                       | Germany                        |
| Kalyanaraman, Dhevi   | PhD student, Biology                                         | Institute of Evolution and Biodiversity                                   | Germany                        |
| Kamai, Ronnie         | Dept. of Structural Engineering                              | Ben-Gurion University of the Negev                                        | Israel                         |
| Kamal, Adam           | Conservation biologist                                       | University of Wisconsin                                                   | United States of America (the) |
| KAMBURSKA, Lyudmila   | Researcher                                                   | CNR                                                                       | Italy                          |

|                       |                                                                                                    |                                                                           |                                |
|-----------------------|----------------------------------------------------------------------------------------------------|---------------------------------------------------------------------------|--------------------------------|
| Kamcke, Claudia       | Biologist                                                                                          |                                                                           | Germany                        |
| Kamenova, Stefaniya   | Postdoc in ecology                                                                                 | University of Oslo                                                        | Norway                         |
| Kamgang, Serge Alexis | Conservation biologist                                                                             | Biodiversite-Environnement et Developpement Durable (BEDD)                | Cameroon                       |
| Kamimura, Vitor       | PhD student                                                                                        | São Paulo State University (UNESP)                                        | Brazil                         |
| Kaminski, Gwenaël     | Research Scientist in Cognitive sciences                                                           | Toulouse University                                                       | France                         |
| Kammann, Claudia      | Professor Climate Change Impact Research for Special Crops, Biogeochemistry, greenhouse gas fluxes | Hochschule Geisenheim University                                          | Germany                        |
| Kammerer, Johannes    | Environmental Physics                                                                              | Institute of Environmental Physics, Heidelberg                            | Germany                        |
| Kämmerle, Jim-Lino    | Postdoc scientist / wildlife ecology                                                               | Chair of Wildlife Ecology and Management, University of Freiburg, Germany | Germany                        |
| Kamp, Ulrich          | Professor                                                                                          | University of Michigan-Dearborn                                           | United States of America (the) |
| kampel, silvana       | Ecologist                                                                                          | INPE                                                                      | Brazil                         |
| Kampel, Sonia         | Master Student in Media- and Instructional Psychology                                              | Chemnitz University of Technology                                         | Germany                        |
| Kempel, Milton        | Senior Researcher                                                                                  | National Institute for Space Research - INPE                              | Brazil                         |
| Kampo, Ibrahima       | Network Manager                                                                                    | Sustainable Development Solution Network in SAHEL                         | Mali                           |
| Kamrath, Clemens      | Physician                                                                                          | Justus Liebig University Giessen                                          | Germany                        |
| Kamsteeg, Frans       | Associate Professor Organization Studies                                                           | Vrije Universiteit Amsteden                                               | Netherlands (the)              |
| Kane, gordon          | professor of physics                                                                               | university of michigan                                                    | United States of America (the) |
| Kanerva, Minna        | Researcher / Sustainability Research                                                               | Sustainability Research Center (artec) - University of Bremen             | Germany                        |
| Kaniuth, Philipp      | PhD candidate                                                                                      | Max Planck Institute for Human Cognitive and Brain Sciences               | Germany                        |
| Kanka, Róbert         | Scientific reearcher                                                                               | Institute of Landscape Ecology Slovak Academy of Sciences                 | Slovakia                       |
| Kann, Jacob           | Aquatic Ecologist                                                                                  | Aquatic Ecosystem Sciences                                                | United States of America (the) |
| Kannah, John          | Instructor, Forestry (Marine Ecosystem Based Management and Climate change)                        | University of Liberia                                                     | Liberia                        |
| Kannappan, Sheila     | Professor of Physics & Astronomy                                                                   | University of North Carolina at Chapel Hill                               | United States of America (the) |
| Kapiel, Tarek         | Assistant Professor                                                                                | Al Baha University                                                        | Saudi Arabia                   |
| Kapitulcinova, Dana   | Researcher                                                                                         | Charles University Environment Centre                                     | Czech Republic (the)           |
| Kaplan, Robert        | Professor Emeritus of Biology                                                                      | Reed College                                                              | United States of America (the) |
| Kaplan, Melissa       | Manager of Ecological Sciences                                                                     | BSC Group                                                                 | United States of America (the) |
| Kapme, Florian        | Professor of Strategy                                                                              | ESB Business School, Reutlingen University                                | Germany                        |
| Kappes, Peter         | Wildlife Biologist                                                                                 | National Wildlife Research Center                                         | United States of America (the) |
| Kapsali, Chrysi       | Biologist                                                                                          | EMBL                                                                      | Italy                          |
| Kapun, MARTIN         | Group Leader                                                                                       | University of Zürich                                                      | Switzerland                    |
| Karaduman, Cana       | Phd Candidate                                                                                      | Tilburg University                                                        | Netherlands (the)              |
| karakas, tahir        | Asistant professor - Philosophy                                                                    | Munzur University                                                         | Turkey                         |
| Karaouzas, Ioannis    | Researcher                                                                                         | Hellenic Centre for Marine Research                                       | Greece                         |
| Karell, Patrik        | Academy Research Fellow                                                                            | Novia University of Applied Sciences                                      | Finland                        |

|                            |                                         |                                                                                                                     |                                                            |
|----------------------------|-----------------------------------------|---------------------------------------------------------------------------------------------------------------------|------------------------------------------------------------|
| KARIMI, Elham              | Postdoctoral researcher                 | Station Biologique de Roscoff/ CNRS- Sorbonne University                                                            | France                                                     |
| Karimi-Rouzbahani, Hamid   | Postdoctoral Research Fellow            | Macquarie University                                                                                                | Australia                                                  |
| Karinou, Eleni             | Postdoctoral research associate         | Newcastle University                                                                                                | United Kingdom of Great Britain and Northern Ireland (the) |
| Karis, Demetrios           | Adjunct professor/Cognitive Psychology  | Bentley University                                                                                                  | United States of America (the)                             |
| Karl, Matthias             | coastal environmental chemistry         | Helmholtz-Zentrum Hereon                                                                                            | Germany                                                    |
| Karls, Jens                | former PhD Candidate                    | University of Cologne                                                                                               | Germany                                                    |
| Karlsson, Therese          | PhD                                     | Departement of marine sciences Gothenburg University                                                                | Sweden                                                     |
| Karn, Santosh Kumar        | Associate Professor                     | Sardar Bhagwan Singh University, Balawala, Dehradun, India                                                          | India                                                      |
| Karn, Santosh Kr.          | Associate Professor                     | Sardar Bhagwan Singh University, Balawala, Dehradun, India                                                          | India                                                      |
| Karna, Sandeep             | PhD Candidate                           | Massey University                                                                                                   | New Zealand                                                |
| Karowe, David              | Professor of Biological Sciences        | Western Michigan University                                                                                         | United States of America (the)                             |
| Karp, Tamara               | Environmental Sciences                  | TU Dresden                                                                                                          | Germany                                                    |
| Karpan, Kirby              | Biological Science Technician III       | NOAA - National Marine Fisheries Service, Alaska Fisheries Science Center                                           | United States of America (the)                             |
| Karpińska-Kołaczek, Monika | Postdoctoral researcher                 | Adam Mickiewicz University, Poznań                                                                                  | Poland                                                     |
| Karr, James                | Professor Emeritus                      | University of Washington, Seattle, Washington                                                                       | United States of America (the)                             |
| Karr, Steve                | Professor of Biology                    | Carson-Newman University                                                                                            | United States of America (the)                             |
| Karr, Susan                | Assistant Professor of Biology          | Carson-Newman University                                                                                            | United States of America (the)                             |
| Karvaly, Gellert Balazs    | head of laboratory                      | Laboratory of Mass Spectrometry and Separation Technology, Department of Laboratory Medicine, Semmelweis University | Hungary                                                    |
| Kashef, Youssef            | Graduate Assistant                      | TU Berlin                                                                                                           | Germany                                                    |
| Kashyap, Rajnandani        | PhD Student                             | CSIR-IICT                                                                                                           | India                                                      |
| Kasper, Claudia            | Researcher - Animal Genetics            | Agroscope                                                                                                           | Switzerland                                                |
| Kaspersen, Kristin         | Research scientist, FT-IR gas analysis. | SINTEF                                                                                                              | Norway                                                     |
| Kassam, Shireen            | Doctor                                  | King' s college Hospital                                                                                            | United Kingdom of Great Britain and Northern Ireland (the) |
| Kassouf, Ana Lucia         | Professor and researcher                | University of Sao Paulo and PEP-Partnership for Economic Policy                                                     | Brazil                                                     |
| Kastrup, Ulrike            | Science museum director                 | focusTerra / ETH Zurich                                                                                             | Switzerland                                                |
| Kasuga, Takao              | Research Molecular Geneticist           | USDA-ARS                                                                                                            | United States of America (the)                             |
| Katell, Chantreau          | Dotorante Sciences de l'éducation       | Université Rennes 2                                                                                                 | France                                                     |
| Kater, Ilona               | PhD Candidate in Arctic Ecology         | Durham University                                                                                                   | United Kingdom of Great Britain and Northern Ireland (the) |
| Katharina, Kaiser          | PhD Student, Meteorology                | Institute for Atmospheric Physics, Uni Mainz                                                                        | Germany                                                    |
| Kathmann, Wiebke           | PhD student                             |                                                                                                                     | Germany                                                    |
| Katkov, Egor               | Ph.D Candidate in Freshwater Ecology    | McGill University                                                                                                   | Canada                                                     |
| Kato, Akiko                | Research engineer, Ecology              | CNRS                                                                                                                | France                                                     |

|                        |                                                                                                  |                                                                                                                   |                                                            |
|------------------------|--------------------------------------------------------------------------------------------------|-------------------------------------------------------------------------------------------------------------------|------------------------------------------------------------|
| Katovai, Eric          | Senior Lecturer, Faculty of Science Technology and Environment                                   | The University of the South Pacific                                                                               | Fiji                                                       |
| Kattge, Jens           |                                                                                                  | Max Planck Institute for Biogeochemistry                                                                          | Germany                                                    |
| Kattner, Iris          | Physician                                                                                        | Hausärztliche Gemeinschaftspraxis Lilienthal                                                                      | Germany                                                    |
| Katz, David            | Founder, President                                                                               | True Health Initiative                                                                                            | United States of America (the)                             |
| Katzenberger, Jakob    | Conservation biologist                                                                           | Georg-August University Goettingen                                                                                | Germany                                                    |
| Kauffman, J Boone      | Climate Change Biology                                                                           | Oregon State University                                                                                           | United States of America (the)                             |
| Kauffman, PhD, Stephen | Professor of Social Work                                                                         | Widener University                                                                                                | United States of America (the)                             |
| Kaufman, Les           | Professor of Biology, and Faculty Fellow, Pardee Center for the Study of the Longer-Range Future | Boston University                                                                                                 | United States of America (the)                             |
| Kausrud, Kyrre         | Epidemiologist                                                                                   | Norwegian Veterinary Institute                                                                                    | Norway                                                     |
| Kautz, Lisa-Ann        | Postdoc                                                                                          | Institute of Meteorology and Climate Research, Department Troposphere Research, Karlsruhe Institute of Technology | Germany                                                    |
| Kavanagh, Meaghan      | PhD candidate                                                                                    | University of Toronto                                                                                             | Canada                                                     |
| KAVANAUGH, DAVID       | Curator Emeritus                                                                                 | California Academy of Sciences                                                                                    | United States of America (the)                             |
| Kawada, Ricardo        | Biologist, Systematic, Comparative Anatomy, and Scientific Photography                           | Universidade Federal da Grande Dourados                                                                           | Brazil                                                     |
| Kawharu, Merata        | Research Professor, Social science (social anthropology, Indigenous entrepreneurship)            | University of Otago                                                                                               | New Zealand                                                |
| Kaya, Ebru             | Assistant professor, Medicine                                                                    | University of Toronto                                                                                             | Canada                                                     |
| Kayal, Mohsen          | Researcher                                                                                       | UMR 5110 CEFREM, University of Perpignan                                                                          | France                                                     |
| Kayanne, Hajime        | Professor                                                                                        | Department of Earth and Planetary Science, the University of Tokyo                                                | Japan                                                      |
| Kayhan, Cenk           | Astrophysics                                                                                     | Erciyes University                                                                                                | Turkey                                                     |
| Kazda, Marian          | Professor, Plant Ecology                                                                         | Ulm University                                                                                                    | Germany                                                    |
| kebour, samir          | professeur et auteur scientifique                                                                | Fascine Institute                                                                                                 | Algeria                                                    |
| Keck, François         | Postdoctoral Researcher / Freshwater Ecology                                                     | Institut national de la recherche agronomique                                                                     | France                                                     |
| Kecler, Roza           |                                                                                                  | Exeter University                                                                                                 | United Kingdom of Great Britain and Northern Ireland (the) |
| Keeley, Annika         | Senior Environmental Scientist                                                                   | Delta Stewardship Council                                                                                         | United States of America (the)                             |
| Keeley, Sterling       | Professor of Botany Emerita                                                                      | University of Hawaii at Manoa                                                                                     | United States of America (the)                             |
| Keenan, Tom            | Environmental Scientist                                                                          | NESA - Environmental Consultants                                                                                  | Ireland                                                    |
| Keeping, Malcolm       | Senior Entomologist                                                                              | South African Sugarcane Research Institute                                                                        | South Africa                                               |
| Keerthan, R            | PhD student, Computer Science                                                                    | Chennai Mathematical Institute                                                                                    | India                                                      |
| Kehoe, Laura           | Postdoctoral Researcher in conservation                                                          | University of Oxford                                                                                              | United Kingdom of Great Britain and Northern Ireland (the) |
| Kehoe, Joseph          | Lecturer in Computing                                                                            | Institute of Technology Carlow                                                                                    | Ireland                                                    |
| Keighley, Xénia        | Biologist                                                                                        | University of Copenhagen & University of Groningen                                                                | Netherlands (the)                                          |
| Keighley, Miles        | Honorary senior lecturer                                                                         | Australian national University                                                                                    | Australia                                                  |
| Keil, Katelyn          | Biology                                                                                          | California State University Northridge                                                                            | United States of America (the)                             |
| Keinath, Tobias        | Environmental Scientist for Agrivoltaics                                                         | Fraunhofer Institute for Solar Energy Systems ISE                                                                 | Germany                                                    |

|                        |                                                        |                                                                |                                                            |
|------------------------|--------------------------------------------------------|----------------------------------------------------------------|------------------------------------------------------------|
| Keiter, Mark           | Geology, Deputy Museum Director                        | Naturkunde-Museum Bielefeld                                    | Germany                                                    |
| Keith, Mark            | Lecturer Zoology                                       |                                                                | South Africa                                               |
| Keitt, Timothy         | Professor                                              | University of Texas at Austin                                  | United States of America (the)                             |
| Keizer, Jan            | Principal Researcher                                   | CESAM, University of Aveiro                                    | Portugal                                                   |
| Ķeksis, Džespers       | akadēmīķis                                             | Latvijas Mūldoloģijas akadēmija                                | Latvia                                                     |
| Kelchner, Scot         | Research Associate                                     | Oregon State University                                        | United States of America (the)                             |
| Keller, Peter          | Structural biology and software development            |                                                                | United Kingdom of Great Britain and Northern Ireland (the) |
| Keller, Alexander      | Group Leader, Molecular Ecology                        | University of Würzburg                                         | Germany                                                    |
| Keller, Reuben         | Associate Professor of Environmental Science           | Loyola University Chicago                                      | United States of America (the)                             |
| Kellerer, Aglaé        | Engineer                                               | European Southern Observatory                                  | Germany                                                    |
| Kellermann, Vanessa    | Research Fellow evolutionary biologist                 | Monash University                                              | Australia                                                  |
| Kelleway, Jeff         | Research Fellow                                        | University of Wollongong                                       | Australia                                                  |
| Kelley, Scott T.       | Professor of Biology                                   | San Diego State University                                     | United States of America (the)                             |
| Kelly, Heather         | Assistant Professor (Teaching)                         | Durham University                                              | United Kingdom of Great Britain and Northern Ireland (the) |
| Kelly, Clare           | Associate Professor, School of Psychology              | Trinity College Dublin                                         | Ireland                                                    |
| Kelly, Robert          | retired oncolgy reasearcher (MSc Research in Oncology) | Sunnybrook Hospital                                            | Canada                                                     |
| Kelt, Douglas          | Professor                                              | University of California Davis                                 | United States of America (the)                             |
| Kemenes, Thomas        | Ecology                                                | Ecomares                                                       | Colombia                                                   |
| Kemp, Daniel           | Lab Technician                                         | Capital Regional District                                      | Canada                                                     |
| Kemp, Joanna Lynn      | Researcher, Freshwater Ecology                         | NIVA (Norwegian Water Research Institute)                      | Norway                                                     |
| Kemppinen, Krista      | ASU-CI Postdoctoral Fellow                             | Arizona State University                                       | United States of America (the)                             |
| Kendall, Bruce         | Professor of Environmental Science & Management        | University of California, Santa Barbara                        | United States of America (the)                             |
| Kennard, Deborah       | Professor, Environmental Science                       | Colorado Mesa University                                       | United States of America (the)                             |
| Kennard, Paul          | Fluvial Geomorphologist                                | Mount Rainier National Park                                    | United States of America (the)                             |
| Kennedy, Ashley        | Entomologist, Postdoctoral Researcher                  |                                                                | United States of America (the)                             |
| Kennedy, Martyn        | Research Fellow, Department of Zoology                 | University of Otago                                            | New Zealand                                                |
| Kennedy, Thomas        | Buohydrologist                                         | The Nature Conservancy                                         | United States of America (the)                             |
| Kennedy, Emma          | Research Scientist                                     | University of Queensland                                       | Australia                                                  |
| Kennedy, Peter         | Post-doctoral Research Fellow                          | Environment and Sustainability Institute, University of Exeter | United Kingdom of Great Britain and Northern Ireland (the) |
| Kennedy, Alice         | PhD Student/Biology                                    | KU Leuven                                                      | Belgium                                                    |
| Kenney, Suzanne        | Chemistry Instructor                                   | Colorado Mesa University                                       | United States of America (the)                             |
| Kenny, Dianna          | Professor of Psychology                                | The University of Sydney                                       | Australia                                                  |
| Kensche, Philip Reiner | Bioinformatics                                         | Deutsches Krebsforschungszentrum, Heidelberg                   | Germany                                                    |
| Kent, Rosalind         | Retired Zoologist and Medical Practitioner             | NHS                                                            | United Kingdom of Great Britain and Northern Ireland (the) |
| Kent, Clement          | Research Associate, Honey Bee Genetics                 | York University                                                | Canada                                                     |
| Kent, Vivien           | Wildlife Biologist                                     | Independent                                                    | United Kingdom of Great Britain and Northern Ireland (the) |



|                       |                                                           |                                                                                                                  |                                                            |
|-----------------------|-----------------------------------------------------------|------------------------------------------------------------------------------------------------------------------|------------------------------------------------------------|
| Kent, Graham          | Senior Instructor of Biology Laboratories                 | Smith College                                                                                                    | United States of America (the)                             |
| Kent, David           | Environmental Scientist                                   | Keller & Heckman                                                                                                 | United States of America (the)                             |
| Kent, Ian             | F.F. , C.M.T. And Arborists                               | Bonny Doon Fire and Rescue.                                                                                      | United States of America (the)                             |
| Kenter, Jasper        | Associate Professor in Ecological Economics               | University of York                                                                                               | United Kingdom of Great Britain and Northern Ireland (the) |
| kenward, john         | Veterinary Surgeon                                        | Royal College of Veterinary Surgeons                                                                             | United Kingdom of Great Britain and Northern Ireland (the) |
| Keppel, Gunnar        | Associate Professor in Environmental Biology              | University of South Australia                                                                                    | Australia                                                  |
| Keppel, Erica         | Marine Biologist                                          | Smithsonian Environmental Research Center                                                                        | United States of America (the)                             |
| Keppeler, Friedrich   | Graduate student                                          | Texas A&M University                                                                                             | United States of America (the)                             |
| Keppler, Ruth         | Post-Doc Geology                                          | University Bonn                                                                                                  | Germany                                                    |
| Keppler, Frank        | Professor of Biogeochemistry                              | Heidelberg University                                                                                            | Germany                                                    |
| Kerchev, Ivan         | Senior Researcher, PhD in ecology (forest entomology)     | Institute of Monitoring of Climatic and Ecological Systems of the Siberian Branch of Russian Academy of Sciences | Russian Federation (the)                                   |
| KERDELHUE, Carole     | Researcher, population genetics                           | INRA, CBGP                                                                                                       | France                                                     |
| Kerdiles, Herve       | Scientific Officer, Food Security Unit                    | European Commission Joint Research Centre                                                                        | Italy                                                      |
| Kerfriden, Baptiste   | PhD student in wood and forest science                    | INRA                                                                                                             | France                                                     |
| Kergaßner, Veronika   | Research in buildings, environment & urban planing        | bewusster bauen                                                                                                  | Germany                                                    |
| Kerhervé, Philippe    | Dr., assistant professor                                  | Cefrem, University of Perpignan                                                                                  | France                                                     |
| Kerhoas, daphne       | Lecturer in Conservation Science                          | Bristol Zoological Society                                                                                       | United Kingdom of Great Britain and Northern Ireland (the) |
| Keriö, Susanna        | Postdoctoral research associate                           | Oregon State University                                                                                          | Finland                                                    |
| Kerkamm, Dr. Ingo     | Geoscientist                                              |                                                                                                                  | Germany                                                    |
| Kerkow, Antje         | Freshwater ecologist                                      | Institut für Gewässerökologie und Binnenfischei (IGB)                                                            | Germany                                                    |
| Kerlinger, Paul       | Consultant to wind and solar companies on wildlife issues | Independent Ph.D. - Biology - 50 papers in peer reviewed journals and 5 books                                    | United States of America (the)                             |
| Kermek, Dragutin      | Full Professor Information Systems                        | University of Zagreb                                                                                             | Croatia                                                    |
| Kernecker, Maria      | Postdoctoral Researcher in social-ecological systems      | Leibniz Centre for Agricultural Landscape Researach                                                              | Germany                                                    |
| Kerou, Melina         | Senior Scientist                                          | University of Vienna                                                                                             | Austria                                                    |
| Kerr, Yann            | Expert in remote sensing, head of unit                    | CNES:CESBIO                                                                                                      | France                                                     |
| Kerr, Jeremy          | Professor of Biology                                      | University of Ottawa                                                                                             | Canada                                                     |
| Kerschbaum, Franz     | Full Professor of Observational Astrophysics              | University Vienna                                                                                                | Austria                                                    |
| Kershaw, Michael      | Assoc Prof Cancer Research                                | Peter MacCallum Cancer Centre                                                                                    | Australia                                                  |
| Kershenbaum, Arik     | Zoologist                                                 | Girton College, University of Cambridge                                                                          | United Kingdom of Great Britain and Northern Ireland (the) |
| Kerstel, Erik         | Professor of Physics                                      | Université Grenoble Alpes                                                                                        | France                                                     |
| Kerstens, Karel       | Professor Microbiology (emeritus)                         | Lab. Microbiology, Faculty of Sciences, University Gent                                                          | Belgium                                                    |
| Kersting, Diego K.    | Researcher Marine Ecology                                 | Universitat de Barcelona                                                                                         | Spain                                                      |
| Kersting, Anna Marlen | Peace and Conflict Studies                                | Otto von Guericke Universtiy Magdeburg                                                                           | Germany                                                    |

|                         |                                                                                        |                                                                    |                                                            |
|-------------------------|----------------------------------------------------------------------------------------|--------------------------------------------------------------------|------------------------------------------------------------|
| Kertesz, Miklos         | associate research professor                                                           | MTA Okologiai Kutatokozpont / MTA Centre for Ecological Research   | Hungary                                                    |
| Kervella, Pierre        | Astronomer                                                                             | Observatoire de Paris                                              | France                                                     |
| Kesnerova, Lucie        | microbiology                                                                           | university of lausanne                                             | Switzerland                                                |
| Kesse-guyot, Emmanuelle | Senior Researcher nutritional epidemiology                                             | Inra                                                               | France                                                     |
| Ketcherside, Damien     | Analytical/Environmental Chemistry - Graduate Research Assistant                       | University of Montana                                              | United States of America (the)                             |
| Kett, Gary              | Phd/ecology                                                                            | University college cork                                            | Ireland                                                    |
| Kettner, Albert         | Associate Professor - Research                                                         | University of Colorado - Boulder, INSTAAR                          | United States of America (the)                             |
| Kettwich, Alexander     | Associate Environmental Engineer                                                       | University of Michigan/Environmental Consulting & Technology, Inc. | United States of America (the)                             |
| Keuroghlian, Alexine    | Coordinator Peccary Project and WWF Brazil Consultant on CEPF project Cerrado Pantanal | IUCN/SSC Peccary Specialist Group                                  | Brazil                                                     |
| KEY, Anthony            | Professor Emeritus (Physics)                                                           | University of Toronto                                              | Canada                                                     |
| Khachatryan, Hayk       | Theoretical Physicist                                                                  |                                                                    | United Kingdom of Great Britain and Northern Ireland (the) |
| Khadraoui, Mehdi        | Evolutionary biologist                                                                 |                                                                    | Germany                                                    |
| Khalatbari, Leili       | PhD Student                                                                            | CIBIO/InBIO, University of Porto Portugal                          | Portugal                                                   |
| Khalife, Jade           | Health systems                                                                         | American University of Beirut, Ministry of Public Health           | Lebanon                                                    |
| Khalil, Elie            | Research Assistant - Epidemiology/Remote Sensing                                       | UCLouvain                                                          | Belgium                                                    |
| Khaliq, Imran           | Assistant Professor                                                                    | Ghazi University                                                   | Pakistan                                                   |
| Kharel, Mohan           | Professor, Genetics                                                                    | Tribhuvan University                                               | Nepal                                                      |
| Khebbeb, Khaled         | Research and teaching assistant - Computer Science                                     | University of Pau                                                  | France                                                     |
| Khoo, Benjamin          | CEO   CTO                                                                              | Elion House                                                        | Singapore                                                  |
| Ki, Tiffany             | Applied Ecology and Conservation                                                       | University of East Anglia                                          | United Kingdom of Great Britain and Northern Ireland (the) |
| Kibblewhite, Mark       | Emeritus Professor of Soil Science                                                     | Cranfield University                                               | United Kingdom of Great Britain and Northern Ireland (the) |
| Kick, Leonhard          |                                                                                        | Ludwig-Maximilians-Universität München                             | Germany                                                    |
| Kidawa, Dorota          | PhD in Biology                                                                         | University of Gdansk                                               | Poland                                                     |
| Kidder, Allison         | Director Point Reyes Field Station/plant ecophysiology                                 | University of California Berkeley                                  | United States of America (the)                             |
| Kidyoo, Aroonrat        | Instructor                                                                             | Department of Botany, Faculty of Science, Chulalongkorn University | Thailand                                                   |
| Kielland, Knut          | Professor of Ecology                                                                   | University of Alaska Fairbanks                                     | United States of America (the)                             |
| Kiener, Jürgen          | research scientist                                                                     | CSNSM, CNRS-IN2P3 and University Paris Sud                         | France                                                     |
| Kienle, Cornelia        | Scientist in aquatic ecotoxicology                                                     | Swiss Centre for Applied Ecotoxicology                             | Switzerland                                                |
| Kiermaier, Michael      | Mathematics                                                                            | Universität Bayreuth                                               | Germany                                                    |
| Kiesel, Jens            | Research Scientist                                                                     | Leibniz-Institute of Freshwater Ecology and Inland Fisheries       | Germany                                                    |
| Kiessling, Tim          | Marine biologist                                                                       | Leibniz Institute for Science and Mathematics Education            | Germany                                                    |
| KIHUMURO, Phillip       | Research Associate/Biodiversity/Climate Science                                        | World Agroforestry                                                 | Uganda                                                     |

|                       |                                                        |                                                                             |                                                            |
|-----------------------|--------------------------------------------------------|-----------------------------------------------------------------------------|------------------------------------------------------------|
| Kildisheva, Olga      | Scientist                                              | University of Western Australia                                             | Australia                                                  |
| Kilian, Norbert       |                                                        | Freie Universitaet Berlin, Botanischer Garten und Botanisches Museum Berlin | Germany                                                    |
| Killcoyne, Sarah      | Research Associate, Computational Cancer Genetics      | Cambridge University                                                        | United Kingdom of Great Britain and Northern Ireland (the) |
| Killeen, Daniel       | Chemist                                                | The New Zealand Institute for Plant and Food Research                       | New Zealand                                                |
| Killeen, Helen        | Graduate Student                                       | UC Davis                                                                    | United States of America (the)                             |
| Killen, Richard       | Professor of Microbiology                              | University Center - College of Lake County                                  | United States of America (the)                             |
| Killian, Amanda       | PhD Candidate                                          | Macquarie University                                                        | Australia                                                  |
| Kilolu, Layla         | Ph.D. candidate, Urban and Regional Planning           | University of Hawaii at Manoa                                               | United States of America (the)                             |
| Kim, Christopher      | Master's                                               | University of Hawaii at Manoa                                               | United States of America (the)                             |
| Kimball, Heather      | Lecturer/Consultant                                    | Pacific Science Advocates                                                   | United States of America (the)                             |
| Kimball, Abby         | PhD Student                                            | Washington University in St Louis                                           | United States of America (the)                             |
| Kimble, Steven        | Clinical Assistant Professor                           | Towson University                                                           | United States of America (the)                             |
| Kimbrough, Elizabeth  | Ecology                                                | Dillard University                                                          | United States of America (the)                             |
| Kimmel, Nathan        | Environmental Engineering                              | University of Michigan                                                      | United States of America (the)                             |
| Kin, Alicia           | Profesor Adjunto                                       | Facultad de Agronomía-UNLPam                                                | Argentina                                                  |
| Kindt, Roeland        | senior ecologist                                       | World Agroforestry Centre (ICRAF)                                           | Kenya                                                      |
| King, James           | DPhil Candidate in Climate Science                     | University of Oxford                                                        | United Kingdom of Great Britain and Northern Ireland (the) |
| King, Dr Gaylord Skip | retired pheromone chemist                              | Simon Fraser University                                                     | Canada                                                     |
| King, Alexander       | Postdoctoral Researcher                                | Technical University of Denmark                                             | United States of America (the)                             |
| King, Tania           | Genetics Technician                                    | University of Otago                                                         | New Zealand                                                |
| King, Nicholas        | Independent Consultant and Researcher in global change |                                                                             | South Africa                                               |
| King, GM              | Professor                                              | Louisiana State University                                                  | United States of America (the)                             |
| King, Edward          | Senior Geophysicist                                    | British Antarctic Survey                                                    | United Kingdom of Great Britain and Northern Ireland (the) |
| King, John            | Professor/Ecosystem Science                            | North Carolina State University                                             | United States of America (the)                             |
| King, Paul            | Psychology/ Philosophy (formerly applied chemistry)    | Independent intellectual                                                    | New Zealand                                                |
| King, Melissa         | Project manager                                        | Government                                                                  | Canada                                                     |
| Kingma, Sytze         | associate professor                                    | VU Amsterdam                                                                | Netherlands (the)                                          |
| Kinkel, Hanno         | Science Coordinaor                                     | School of Geography, Earth and Environmental Sciences, Plymouth University  | United Kingdom of Great Britain and Northern Ireland (the) |
| Kinnard, Christophe   | Professor, environmental sciences                      | UQTR                                                                        | Canada                                                     |
| Kinross, Cilla        | Adjunct Lecturer, Environmental Management             | Charles Sturt University                                                    | Australia                                                  |
| Kinsella, Fiadh       | Park Ranger/ Educator/ Medic                           | National Park Service                                                       | United States of America (the)                             |
| Kirby, Keith          | Honorary visiting researcher                           | Department of Plant Sciences, University of Oxford                          | United Kingdom of Great Britain and Northern Ireland (the) |
| Kirca, Simay          | Ass.Prof. / Landscape planning                         | Istanbul University-Cerrahpasa                                              | Turkey                                                     |
| Kirch, Anton          | Physics                                                | TU Dresden                                                                  | Germany                                                    |

|                          |                                                    |                                                                                         |                                                            |
|--------------------------|----------------------------------------------------|-----------------------------------------------------------------------------------------|------------------------------------------------------------|
| Kirchler, Michael        | Professor; Behavioral Economics and Finance        | University of Innsbruck                                                                 | Austria                                                    |
| Kirchoff, Bruce          | Professor of Biology                               | University of North Carolina at Greensboro                                              | United States of America (the)                             |
| Kirkendall, Lawrence     | Professor of Biological Sciences                   | University of Bergen                                                                    | Norway                                                     |
| Kirkland, Hannah         | Conservation biology                               |                                                                                         | United Kingdom of Great Britain and Northern Ireland (the) |
| Kirkland, Maire          | PhD student                                        | Durham University                                                                       | United Kingdom of Great Britain and Northern Ireland (the) |
| Kirkman, Kevin           | Professor: Grassland Science                       | University of KwaZulu-Natal                                                             | South Africa                                               |
| Kirwan, Guy              | Research Associate, Ornithology                    | Field Museum of Natural History, Chicago                                                | United Kingdom of Great Britain and Northern Ireland (the) |
| Kisekelwa, Tchalondawa   | Lecturer/associate professor                       | Institut Supérieur de Bukavu                                                            | Congo (the Democratic Republic of the)                     |
| Kisel, Yael              | Analytics Lead, Climate Smart Program              | City of San Jose                                                                        | United States of America (the)                             |
| Kisela, Angela           | Environmental Scientist                            |                                                                                         | United States of America (the)                             |
| Kisker, Klaus Peter      | Professor                                          | Freie Universität Berlin                                                                | Germany                                                    |
| Kiss, Réka               | Research fellow                                    |                                                                                         | Hungary                                                    |
| Kissas, George           | PhD psychologist - psychotherapist                 | Athens                                                                                  | Greece                                                     |
| Kissel, Jeffrey          | Controls Engineer / Astrophysics                   | LIGO Hanford Observatory (Caltech)                                                      | United States of America (the)                             |
| Kitaba, Abdi             | Biology Teacher                                    | Dambi Dollo University                                                                  | Ethiopia                                                   |
| Kitsa, Hugues            | Mathematics teacher                                | TUT                                                                                     | South Africa                                               |
| Kittel, Martin           | Research Associate, Energy Economics               | German Institute for Economic Research (DIW Berlin)                                     | Germany                                                    |
| Kittelmann, Sebastian    |                                                    | University of Oxford                                                                    | United Kingdom of Great Britain and Northern Ireland (the) |
| Kitts, Nolan             | Research Assistant / Environmental Economics       | Woods Hole Research Center                                                              | United States of America (the)                             |
| Kızırmaklı Demir, Aybüke | PhD Student                                        | Tekirdağ Namık Kemal University                                                         | Turkey                                                     |
| KLACZKO, Louis Bernard   | Professor / Genetics and Evolution                 | UNICAMP - State University of Campinas                                                  | Brazil                                                     |
| Klahr, Barbara           | Observación de Flora y Fauna de la Isla Formentera |                                                                                         | Spain                                                      |
| Klarenbach, Magdalena    | Ph. D student in Sociology                         | Jagiellonian University                                                                 | Poland                                                     |
| Klass, Keren             | PhD candidate                                      | University of Toronto                                                                   | Canada                                                     |
| Klassen, Susanna         | PhD Candidate                                      | Institute for Resources, Environment and Sustainability, University of British Columbia | Canada                                                     |
| Klaus, Marcus            | Postdoc - Biogeochemistry                          | Swedish University of Agricultural Sciences                                             | Sweden                                                     |
| Klauss, Hans-Henning     | Professor of Solid State Physics                   | Technische Universität Dresden                                                          | Germany                                                    |
| Klawitter, Jonathan      | PhD Student                                        | University of Auckland                                                                  | New Zealand                                                |
| Klayn, Stefania          | Researcher, marine biology                         | Institute of Biodiversity and Ecosystem Research, Bulgarian Academy of Sciences         | Bulgaria                                                   |
| Kleemeyer, Maike         | Postdoc                                            | Max-Planck-Institute for Human Development                                              | Germany                                                    |
| Klees van Bommel, Joanna | Master's Student                                   | University of British Columbia                                                          | Canada                                                     |
| Klein, Ákos              | Conservation Biologist PhD                         | The Barn Owl Foundation                                                                 | Hungary                                                    |
| Klein, Nicole            | post doc, paleontology                             | University of Bonn                                                                      | Germany                                                    |
| Klein, Maximilian        | PHD Pediatric Medicine                             |                                                                                         | Germany                                                    |
| Klein, Hildegard         | Researcher                                         | Rhodes University                                                                       | South Africa                                               |

|                       |                                                   |                                                                                                                |                                                            |
|-----------------------|---------------------------------------------------|----------------------------------------------------------------------------------------------------------------|------------------------------------------------------------|
| Klein, Bert           | Biology                                           |                                                                                                                | Canada                                                     |
| KLEIN, Hugh           | Principal Research Scientist                      | National Physical Laboratory (NPL) UK                                                                          | United Kingdom of Great Britain and Northern Ireland (the) |
| Kleine Dr., Matthias  | Agricultural science                              | Agricultural high school                                                                                       | Germany                                                    |
| Kleinhans, Kerstin    | PhD Candidate - circular economy                  | Ghent University                                                                                               | Belgium                                                    |
| Kleinhans, Maarten    | chair in biogeomorphology of rivers and estuaries | Utrecht University, Faculty of Geosciences                                                                     | Netherlands (the)                                          |
| Kleinman Ruiz, Daniel | PhD Student, Genomics and Conservation            | Estación Biológica de Doñana, EBD-CSIC                                                                         | Spain                                                      |
| Klemann, Volker       | Geophysicist                                      | German Research Centre for Geosciences - GFZ Potsdam                                                           | Germany                                                    |
| Klemm, Paul           | Postdoctoral researcher, Bioinformatics           | Max Planck Institute for Metabolism Research                                                                   | Germany                                                    |
| Klemt, Alexander      | Teacher, M.Sc. Physics                            |                                                                                                                | Germany                                                    |
| Klept, Joghan         | Senior Researcher                                 | Belarus Institute of Climate                                                                                   | Belarus                                                    |
| Kliem, Lea            | Researcher                                        | Insitute for Ecological Economy Research / University of Oldenburg                                             | Germany                                                    |
| Kline, Norma          | Conservation Biology                              | US. DOI Fish and Wildlife Service (retired)                                                                    | United States of America (the)                             |
| Klingenfuss, Sara     | PhD student / Plant Ecology and Diversity         | University of Freiburg                                                                                         | Germany                                                    |
| Klinger, Julie        | Assistant Professor of Geography                  | University of Delaware                                                                                         | United States of America (the)                             |
| Klinges, David        | PhD Student                                       | University of Florida                                                                                          | United States of America (the)                             |
| Klinman, Judith       | Professor of the Graduate School                  | UC Berkeley                                                                                                    | United States of America (the)                             |
| Klinsmann, Markus     | Research engineer, PhD, Physicist                 | Robert Bosch Corporate Research                                                                                | Germany                                                    |
| Klöck, Carola         | political science                                 | Sciences Po Paris                                                                                              | France                                                     |
| Kloos, Stephan        | Senior researcher, Social Anthropology            | Austrian Academy of Sciences                                                                                   | Austria                                                    |
| Klop-Toker, Kaya      | Post-doctoral researcher in Conservation Biology  | University of Newcastle                                                                                        | Australia                                                  |
| Kloprogge, Theo       | Adjunct professor geology/chemistry               | University of the Philippines Visayas (Philippines)/University of Queensland (Australia)                       | Philippines (the)                                          |
| Klug, Linus           | PhD-student, geology                              | Universität Bonn                                                                                               | Germany                                                    |
| Klug, Christian       | Professor, palaeontology                          |                                                                                                                | Switzerland                                                |
| Klug, Marius          | PhD student                                       | Technische Universität Berlin                                                                                  | Germany                                                    |
| Kluge, Tobias         |                                                   | Institute of Environmental Physics, Heidelberg University                                                      | Germany                                                    |
| Kluge, Bjoern         | Assistent Professor                               | Technische Universität Berlin                                                                                  | Germany                                                    |
| Kluger, Lotta         | Postdoctoral researcher                           | Leibniz Center for Tropical Marine Research (ZMT); artec Sustainability Research Center - University of Bremen | Germany                                                    |
| Klüppelberg, Achim    | PhD Candidate                                     | KTH Royal Institute of Technology                                                                              | Sweden                                                     |
| Kluschat, Björn       |                                                   | Institute of atmospheric physics Mainz                                                                         | Germany                                                    |
| Kluska, Jacques       | Postdoctoral fellow in Astrophysics               | KU Leuven                                                                                                      | Belgium                                                    |
| Kment, Petr           | researcher                                        | National Museum, Prague                                                                                        | Czech Republic (the)                                       |
| Kmentová, Nikol       | PhD student                                       | Masaryk University                                                                                             | Czech Republic (the)                                       |
| Kmita, Hanna          | Professor of biological sciences                  | Adam Mickiewicz University                                                                                     | Poland                                                     |
| Knacke, Roger         | Astronomer (Emeritus)                             | The Pennsylvania State University Erie                                                                         | United States of America (the)                             |
| Knape, Jonas          | Associate Professor in Ecology                    | Swedish University of Agricultural Sciences                                                                    | Sweden                                                     |

|                           |                                                                                     |                                                                      |                                                            |
|---------------------------|-------------------------------------------------------------------------------------|----------------------------------------------------------------------|------------------------------------------------------------|
| Knapp, William            | Co-Founder, Inventor, President and Chief Executive Officer                         | BIO-H2-GEN Inc.                                                      | Canada                                                     |
| Knapp, Sonja              | Geoecologist                                                                        | Helmholtz-Centre for Environmental Research - UFZ                    | Germany                                                    |
| Kneer, Reinhold           | Professor Heat and Mass Transfer                                                    | RWT Aachen University                                                | Germany                                                    |
| Knees, Sabina             | Research Associate                                                                  | Royal Botanic Garden Edinburgh                                       | United Kingdom of Great Britain and Northern Ireland (the) |
| Knees, Dr Sabina          | Research Associate, Centre for Middle Eastern Plants                                | Royal Botanic Garden Edinburgh                                       | United Kingdom of Great Britain and Northern Ireland (the) |
| Kneib, Marin              | PhD student in glaciology                                                           | Swiss Federal Institute for Forest, Snow and Landscape               | Switzerland                                                |
| Knight, Stefan            | Professor of Structural Biology                                                     | Uppsala University                                                   | Sweden                                                     |
| Knight, David             | Structural Biology                                                                  | Dr.                                                                  | United Kingdom of Great Britain and Northern Ireland (the) |
| Knight, Jon               | Research Scientist                                                                  | Griffith University                                                  | Australia                                                  |
| Knight, Christopher       | PhD Student                                                                         | Stanford University                                                  | United States of America (the)                             |
| Knight, Andrew            | Professor of Animal Welfare and Ethics                                              | University of Winchester                                             | United Kingdom of Great Britain and Northern Ireland (the) |
| Knighton, James           | Postdoctoral Fellow                                                                 | The National Socio-Environmental Synthesis Center                    | United States of America (the)                             |
| Knippertz, Peter          | Professor of Meteorology                                                            | Karlsruhe Institute of Technology                                    | Germany                                                    |
| Knisley, Keith            | Biologist                                                                           | Retired - W.L. Gore & Associates Inc                                 | United States of America (the)                             |
| Knispel de Acosta, Saskia | climate science                                                                     | Scientists 4 Future                                                  | Germany                                                    |
| Knoben, Wouter            | Hydrology                                                                           |                                                                      | Canada                                                     |
| Knödlseider, Jürgen       | Astrophysicist                                                                      | CNRS                                                                 | France                                                     |
| Knoerzer, Kai             | Principal Research Scientist / Food Process Engineering                             | Commonwealth Scientific and Industrial Research Organisation (CSIRO) | Australia                                                  |
| Knohl, Alexander          | Professor of Bioclimatology                                                         | University of Goettingen                                             | Germany                                                    |
| Knoll, Lars               | PhD, Physics                                                                        | University of Heidelberg, Germany                                    | Norway                                                     |
| Knop-Huelss, Katharina    | Research Associate                                                                  | Hanover University of Music, Drama, and Media                        | Germany                                                    |
| Knope, Matthew            | Assistant Professor of Biology                                                      | University of Hawaii at Hilo                                         | United States of America (the)                             |
| Knörnschild, Mirjam       | Biologist                                                                           | Museum für Naturkunde Berlin                                         | Germany                                                    |
| Knorr, Wolfgang           | visiting research scientist                                                         | Lund University                                                      | Sweden                                                     |
| Knott, Alistair           | Associate Professor, Computer Science                                               | University of Otago                                                  | New Zealand                                                |
| Knowles, Travis           | Associate Professor of Biology                                                      | Francis Marion University                                            | United States of America (the)                             |
| Knudsen, Kerry            | Lichenologist, Mycologist                                                           | University of Life Sciences in Prague                                | Czech Republic (the)                                       |
| Knutson Jr, Arthur C      | Retired Senior Fishery Biologist, MS Fisheries Biologist, Humboldt State University | California Department of Fish and Game                               | United States of America (the)                             |
| Kobrow, Christian         | Physic Master Student                                                               | University Heidelberg                                                | Germany                                                    |
| Koç, Gökçe                | Phd Candidate                                                                       | Ege University                                                       | Turkey                                                     |
| Koch, Natalia             | PhD in Ecology                                                                      | Universidade Federal de Mato Grosso do Sul                           | Brazil                                                     |
| Koch, Jack                | Graduate Student                                                                    | Oregon State University                                              | United States of America (the)                             |
| Koch, Susanne             | MD Dr.                                                                              | Charité                                                              | Germany                                                    |
| Koch, Claudia             | Herpetologist                                                                       | Zoological Research Museum Alexander Koenig                          | Germany                                                    |
| Koch, André               | Herpetologist                                                                       | Zoologisches Forschungsmuseum Alexander Koenig                       | Germany                                                    |

|                         |                                                                                              |                                                                                                                                                                                                                   |                                                            |
|-------------------------|----------------------------------------------------------------------------------------------|-------------------------------------------------------------------------------------------------------------------------------------------------------------------------------------------------------------------|------------------------------------------------------------|
| Koch, Alain             | Engineer, chemistry                                                                          | Université de Lorraine                                                                                                                                                                                            | France                                                     |
| Koch, Rainald           | Physicist, PhD                                                                               | <a href="https://www.bayceer.uni-bayreuth.de/atchem/de/mitarbeiter/mit/mitarbeiter_detail.php?id_obj=32357">https://www.bayceer.uni-bayreuth.de/atchem/de/mitarbeiter/mit/mitarbeiter_detail.php?id_obj=32357</a> | Germany                                                    |
| Koch, Matthias          | PhD Student                                                                                  | Institute for Heat and Mass Transfer, RWTH Aachen                                                                                                                                                                 | Germany                                                    |
| Koch, Sebastian         | PHD Student                                                                                  | TU Berlin                                                                                                                                                                                                         | Germany                                                    |
| Kociniewska, Katarzyna  | PhD student and specialist of environmental protection                                       | University of Sciences and Technology in Bydgoszcz                                                                                                                                                                | Poland                                                     |
| Kock, Lutz (geschäftl.) | Dipl.-Ing., Mechanical Engineer                                                              |                                                                                                                                                                                                                   | Germany                                                    |
| Kock, Richard           | Professor Wildlife Health Dept Pathobiology and Population Sciences                          | Royal Veterinary College                                                                                                                                                                                          | United Kingdom of Great Britain and Northern Ireland (the) |
| Kocken, Ilja            | PhD candidate in Palaeoceanography                                                           | Utrecht University                                                                                                                                                                                                | Netherlands (the)                                          |
| Kocsis, Adam            | PostDoc Researcher, Paleocology                                                              | University of Erlangen-Nuremberg                                                                                                                                                                                  | Germany                                                    |
| Koebler, Juergen        | Physicist                                                                                    | ScientaOmicron Technology GmbH                                                                                                                                                                                    | Germany                                                    |
| Koeck, Barbara          | Research associate at the Institute of Biodiversity, Animal Health, and Comparative Medicine | University of Glasgow                                                                                                                                                                                             | United Kingdom of Great Britain and Northern Ireland (the) |
| Koehler, Sabrina        | Evolutionary Ecology                                                                         | Kiel University                                                                                                                                                                                                   | Germany                                                    |
| Koehn, Monica           | Psychology                                                                                   | Western Sydney University                                                                                                                                                                                         | Australia                                                  |
| Koelmeyer, Eloise       | Veterinarian                                                                                 | Gungahlin Veterinary hospital                                                                                                                                                                                     | Australia                                                  |
| Koen, Carla             | Professor of Technology Strategy and Innovation                                              | Tias School for Business; Tilburg and Eindhoven University                                                                                                                                                        | Netherlands (the)                                          |
| Koenig, Guillaume       | PhD Physical Oceanography                                                                    | Mediterranean Institute of Oceanography                                                                                                                                                                           | France                                                     |
| Koenig, Walter          | Research Zoologist, Emeritus                                                                 | Univ. California Berkeley                                                                                                                                                                                         | United States of America (the)                             |
| Koenigsberger, Gloria   | Researcher, Astrophysics                                                                     | Universidad Nacional Autonoma de Mexico                                                                                                                                                                           | Mexico                                                     |
| Koentges, Georgy        | Professor of Biomedicine and Evolution                                                       | University of Warwick                                                                                                                                                                                             | United Kingdom of Great Britain and Northern Ireland (the) |
| Koester, Larissa        | Scientific Associate                                                                         | Center of Excellence for Cogeneration Technologies                                                                                                                                                                | Germany                                                    |
| Koeth, Monica           | Entomology                                                                                   |                                                                                                                                                                                                                   | Germany                                                    |
| Koetje, David           | Professor of Biology                                                                         | Calvin University                                                                                                                                                                                                 | United States of America (the)                             |
| Kohl, Matthias          | Mathematics in Biology and Medicine                                                          | Furtwangen University                                                                                                                                                                                             | Germany                                                    |
| Kohlbecker, Andreas     | Research associate / biodiversity informatics                                                | Botanic Garden and Botanical Museum Berlin-Dahlem                                                                                                                                                                 | Germany                                                    |
| Kohler, Quentin         | Nature project Manager                                                                       | ProNatura                                                                                                                                                                                                         | Switzerland                                                |
| Kohler, Tyler           | Postdoc                                                                                      | EPFL                                                                                                                                                                                                              | Switzerland                                                |
| Köhler, Meike           | ICREA Prof. Head Paleobiology                                                                | Institut Català de Paleontologia                                                                                                                                                                                  | Spain                                                      |
| Köhler, Karsten         | Dr., Dipl. Biochem.                                                                          | In Biotech Industry                                                                                                                                                                                               | Germany                                                    |
| Kohout, Tomas           | University researcher, planetary science                                                     | University of Helsinki                                                                                                                                                                                            | Finland                                                    |
| Kohring, Malte          | PhD student in Physics                                                                       | Friedrich-Alexander-Universität Erlangen-Nürnberg, Chair of Applied Physics                                                                                                                                       | Germany                                                    |
| Koizumi, Shuntaro       | PhD Student                                                                                  | Umeå University                                                                                                                                                                                                   | Sweden                                                     |
| Kok, Anna-Mari          | PhD student in Medicinal Plant Sciences                                                      | University of Pretoria                                                                                                                                                                                            | South Africa                                               |
| Koker, Liane            | Engineering                                                                                  | Karlsruhe Institute of Technology (KIT)                                                                                                                                                                           | Germany                                                    |
| Kokeš, Rae              | Field Biologist                                                                              | Matusadona Lion Project                                                                                                                                                                                           | Zimbabwe                                                   |

|                             |                                                                                                     |                                                                             |                                                            |
|-----------------------------|-----------------------------------------------------------------------------------------------------|-----------------------------------------------------------------------------|------------------------------------------------------------|
| Kokkoris, Vasilis           | postdoctoral fellow. Mycology, ecology, genetics                                                    | University of Ottawa                                                        | Canada                                                     |
| Kokurewicz, Tomasz          | University teacher, ecology                                                                         | Wroclaw University of Environmental and Life Sciences                       | Poland                                                     |
| Kolada, Agnieszka           | DSc. senior researcher                                                                              | Institute of Environmental Protection - National Research Institute         | Poland                                                     |
| Kolankiewicz, Leon          | Senior Environmental Manager                                                                        | Solv LLC                                                                    | United States of America (the)                             |
| Kolanowski, Wojciech        | professor / health science                                                                          | Siedlce University                                                          | Poland                                                     |
| Kolb, Chelsea               | Environmental engineering                                                                           |                                                                             | United States of America (the)                             |
| Kolb, Melanie               | Associate Professor                                                                                 | Geographical Institute, UNAM                                                | Mexico                                                     |
| Kolda, Anamarija            | M.Sc. Environmental Science                                                                         | Ruder Boskovic Institute                                                    | Croatia                                                    |
| Koleček, Jaroslav           | Researcher in ecology                                                                               | The Czech Academy of Sciences, Institute of Vertebrate Biology              | Czech Republic (the)                                       |
| Kolesnikow, Tassia          | Molecular Genetics                                                                                  | University of New South Wales                                               | Australia                                                  |
| Kollenda, Diana             | PhD candidate                                                                                       | Giessen University                                                          | Germany                                                    |
| Koller, Julia               | PhD student, Health Psychology                                                                      | University of Konstanz                                                      | Germany                                                    |
| Kolmes, Steven              | Professor of Environmental Studies and Biology, Molter Chair in Science                             | University of Portland                                                      | United States of America (the)                             |
| Kolstein, Machiel           | researcher                                                                                          | IFAE                                                                        | Spain                                                      |
| Kolstoe, Simon              | Research Ethics                                                                                     | University of Portsmouth                                                    | United Kingdom of Great Britain and Northern Ireland (the) |
| Koltzenburg, Michael        | Dipl. Biol.                                                                                         | University of Tuebingen                                                     | Germany                                                    |
| Kominoski, John             | Associate Professor                                                                                 | Florida International University                                            | United States of America (the)                             |
| Komonen, Atte               | Senior lecturer in ecology and evolution                                                            |                                                                             | Finland                                                    |
| Komor, Christian            | Neuropsychology                                                                                     | Wright State University                                                     | United States of America (the)                             |
| Komorowski, Jean-Christophe | University professor / volcanology                                                                  | Institut de physique du globe de Paris                                      | France                                                     |
| Kompas, Tom                 | Professor of Environmental Economics                                                                | University of Melbourne                                                     | Australia                                                  |
| Könczey, Réka               | biologist, educational researcher                                                                   | Eszterhazy Karoly University - Hungarian Institute for Educational Research | Hungary                                                    |
| Kondor, Imre                | professor of physics                                                                                | retired                                                                     | Hungary                                                    |
| Kondratow, Floriane         | Ecology                                                                                             |                                                                             | France                                                     |
| Könemann, Markus            | group leader                                                                                        | RWTH Aachen University                                                      | Germany                                                    |
| Konen, Kai                  | PhD Student / Intelligent Systems                                                                   | German Aerospace Center                                                     | Germany                                                    |
| König, Dr. Lutz             | Medicine                                                                                            | Krankenhaus                                                                 | Germany                                                    |
| königson, sara              | researcher                                                                                          | department of aquatic resources                                             | Sweden                                                     |
| Koniuk, Roman               | Professor Physics                                                                                   | York University                                                             | Canada                                                     |
| Konok, Veronika             | Research fellow                                                                                     | Biology Institution, Eötvös University, Budapest                            | Hungary                                                    |
| Konopka, Jan                | PhD student                                                                                         | TU Braunschweig                                                             | Germany                                                    |
| Koocheki, Alireza           | Professor                                                                                           | Ferdowsi University of Mashhad                                              | Iran (Islamic Republic of)                                 |
| Kool, Richard               | Professor, School of Environment and Sustainability                                                 | Royal Roads University                                                      | Canada                                                     |
| Koontz, Fred                | Wildlife Biology                                                                                    | Retired                                                                     | United States of America (the)                             |
| Koopmans, Marion            | Head, viroscience department, director Emering Infectious Disease Netherlands Centre for One Health | ErasmusMC, Rotterdam                                                        | Netherlands (the)                                          |



|                         |                                                                                    |                                                                                                       |                                                            |
|-------------------------|------------------------------------------------------------------------------------|-------------------------------------------------------------------------------------------------------|------------------------------------------------------------|
| Koorem, Kadri           | Researcher                                                                         | University of Tartu                                                                                   | Estonia                                                    |
| Koors, Arne             | Research Associate Computer Science                                                | Universität Hamburg (University of Hamburg, Germany)                                                  | Germany                                                    |
| Koot, Emily             | Scientist                                                                          | The New Zealand Institute for Plant & Food Research                                                   | New Zealand                                                |
| Koot, Stasja            | Assistant Professor                                                                | Sociology of Development and Change, Wageningen University                                            | Netherlands (the)                                          |
| Kooyman, Robert         | Research Ecologist-Botanist                                                        | Macquarie University                                                                                  | Australia                                                  |
| Kopach, Andrii          | PhD candidate                                                                      | MPI-CBG                                                                                               | Germany                                                    |
| Kopecky, Vladimir       | researcher / biophysicist                                                          | Charles University                                                                                    | Czech Republic (the)                                       |
| Kopelman, Arthur        | SUNY Distinguished Service Professor and Professor of Science/Ecology at SDUNY/FIT | Fashion Institute of Technology of the State University of New York                                   | United States of America (the)                             |
| Kopljär, Dennis         | Research Associate, Electrochemical Energy Technology                              | Deutsches Zentrum für Luft- und Raumfahrt (DLR)                                                       | Germany                                                    |
| Kopnina, Helen          |                                                                                    | The Hague University of Applied Sciences                                                              | Netherlands (the)                                          |
| Koppel, Maximilian      | Research Engineer in climate research on vegetable crops                           | Hochschule Geisenheim University                                                                      | Germany                                                    |
| Koppelman, Rolf         | Biological Oceanography                                                            | University of Hamburg                                                                                 | Germany                                                    |
| Koppelmeyer, Bernd      | Limnologist                                                                        | enviteam Umwelt-Netzwerk Gewässer & Landschaft                                                        | Germany                                                    |
| Koppenleitner, Reinhard | Pediatrician, MPH, Dr. med.                                                        | KLUG Deutsche Allianz Klimawandel und Gesundheit e.V.                                                 | Germany                                                    |
| Koproski, Leticia       | Wildlife Veterinarian                                                              | Tríade - Instituto Brasileiro para Medicina da Conservação                                            | Brazil                                                     |
| Korb, Julie             | Professor/Environmental Biology                                                    | Fort Lewis College                                                                                    | United States of America (the)                             |
| Korbut, Zofia           | Laboratory Support Specialist                                                      | IIMCB Warsaw                                                                                          | Poland                                                     |
| Kordubel, Katharina     | Masters student                                                                    | Ghent university                                                                                      | Germany                                                    |
| Korell, Lotte           | Postdoc                                                                            | Martin Luther University Halle-Wittenberg, German Centre for Integrative Biodiversity Research (iDiv) | Germany                                                    |
| Koretsky, Carla         | Geochemistry professor                                                             | Western Michigan University                                                                           | United States of America (the)                             |
| Korine, Carmi           | Prof. Animal Ecology                                                               | Ben-Gurion University of the Negev                                                                    | Israel                                                     |
| Kormann, Urs            | Researcher, Ecological Research                                                    | Swiss Ornithological Institute                                                                        | Switzerland                                                |
| Kormas, Konstantinos    | Professor                                                                          | University of Thessaly                                                                                | Greece                                                     |
| Kormos, Laura           | Senior Lecturer in Physics                                                         | Lancaster University                                                                                  | United Kingdom of Great Britain and Northern Ireland (the) |
| Korn, Alexander         | PhD student, Biomedicine/Biophysics                                                | Institut für Medical Physics and Biophysics, Leipzig University                                       | Germany                                                    |
| Korňan, Martin          | Research ecologist and zoologist                                                   | Technical University in Zvolen                                                                        | Slovakia                                                   |
| Kornder, Niklas         | PhD marine ecology                                                                 | University of Amsterdam                                                                               | Netherlands (the)                                          |
| Kornhauser, Isaac       | Physicochemical of surfaces                                                        | Universidad Autónoma Metropolitana                                                                    | Mexico                                                     |
| Korochkina, Maria       | PhD Student in Cognitive Science                                                   | Macquarie University, Australia; University of Potsdam, Germany                                       | Australia                                                  |
| Koroiva, Ricardo        | Postdoctoral researcher                                                            | Instituto Nacional de Pesquisas da Amazônia                                                           | Brazil                                                     |
| Korosi, Jennifer        | Assistant Professor, Limnology & Environmental Science                             | York University                                                                                       | Canada                                                     |

|                            |                                                                    |                                                                                                           |                                                            |
|----------------------------|--------------------------------------------------------------------|-----------------------------------------------------------------------------------------------------------|------------------------------------------------------------|
| Korpelainen, Helena        | Professor                                                          | Unuversity of Helsinki                                                                                    | Finland                                                    |
| KORSTAD, JOHN              | Professor of Biology                                               | Oral Roberts Univ.                                                                                        | United States of America (the)                             |
| Kortschak, R Daniel        | Lecturer in Bioinformatics                                         | The University of Adelaide                                                                                | Australia                                                  |
| Kortsen, Kristoffer        | Post Doctoral Research Associate                                   | university of Manchester                                                                                  | United Kingdom of Great Britain and Northern Ireland (the) |
| Korwin Krukowski, Paolo    | PhD student, Plant Physiology                                      | University of Turin                                                                                       | Italy                                                      |
| Korzeniowski, Konrad       | PhD researcher                                                     | KU Leuven                                                                                                 | Belgium                                                    |
| Kosanic, Sasha             | Lecturer/Senior Lecturer                                           | Liverpool John Moores                                                                                     | United Kingdom of Great Britain and Northern Ireland (the) |
| Kosanic, Aleksandra        | Lecturer in Climate Change Ecology                                 | Liverpool John Moores University                                                                          | United Kingdom of Great Britain and Northern Ireland (the) |
| Koschinski, Sven           | Biologist                                                          | Meereszoologie                                                                                            | Germany                                                    |
| Koschnitzke, Cristiana     | Professor                                                          | Universidade Federal do Rio de Janeiro                                                                    | Brazil                                                     |
| Koselj, Klemen             | Biology                                                            | Max Planck Institute for Ornithology                                                                      | Germany                                                    |
| Koskela, Elli              | postdoc/plant biology                                              | University of Helsinki                                                                                    | Finland                                                    |
| Koslowski, Max             | PhD student                                                        | INATECH, Albert Ludwig University Freiburg                                                                | Germany                                                    |
| Kostakis, Vasilis          | Professor                                                          | Tallinn University of Technology                                                                          | Estonia                                                    |
| Köster, Nils               | Scientific curator, Botanic Garden and Botanical Museum Berlin     | Freie Universität Berlin                                                                                  | Germany                                                    |
| Koster, PhD, Emlyn         | Adjunct Professor   Anthropocene                                   | Department of Marine, Earth and Atmospheric Sciences, North Carolina State University                     | United States of America (the)                             |
| Kotar, Sydney              | Toxicology Laboratory Assistant                                    |                                                                                                           | United States of America (the)                             |
| Kothandaraman, Subashree   | Postdoctoral Fellow in Botany (Ecology and Environmental Sciences) | Dr. Harisingh Gour Vishwavidyalaya (A Central University)                                                 | India                                                      |
| Kotharambath, Ramachandran | Assistant Professor                                                | Central University of Kerala                                                                              | India                                                      |
| Kothawala, Dolly           | Researcher - Freshwater Ecosystems                                 | Uppsala University                                                                                        | Sweden                                                     |
| Kotiaho, Janne             | Professor of Ecology, Chair of Finnish National IPBES-panel        | University of Jyväskylä, Department of Biological and Environmental Science and School of Resource Wisdom | Finland                                                    |
| Kotov, Alexey              | Corresponding Member of Russian Academy of Sciences                | A.N. Severtsov Institute of Ecology and Evolution                                                         | Russian Federation (the)                                   |
| Kotowski, Wiktor           | university professor, biology                                      | University of Warsaw, Faculty of Biology                                                                  | Poland                                                     |
| Kotrlova, Andrea           | Researcher in Astrophysics                                         | Silesian University in Opava, Research Center for Computational Physics and Data Processing               | Czech Republic (the)                                       |
| Kotta, Jonne               | research professor                                                 | Estonian Marine Institute, University of Tartu                                                            | Estonia                                                    |
| Kottelat, Maurice          | Ichthyologists                                                     | .                                                                                                         | Switzerland                                                |
| Kouagou, M'Mouyohoun       | Ecological Modeling                                                | Laboratory of Ecology, Botany and Plant Biology, University of Parakou, Republic of Benin                 | Benin                                                      |
| koubbi, philippe           | Professor                                                          | Sorbonne Université                                                                                       | France                                                     |
| Kouchner, Coline           | Agronomy, PhD Student                                              | INRA                                                                                                      | France                                                     |
| Kouikoglou, Vassilis       | Professor                                                          | Technical University of Crete                                                                             | Greece                                                     |
| Kovács, Margit             | assistant professor, chemistry                                     | University of Pannonia                                                                                    | Hungary                                                    |
| Kovács, Bence              | assistant research fellow                                          | MTA Centre for Ecological Research                                                                        | Hungary                                                    |

|                          |                                                                        |                                                                                              |                                                            |
|--------------------------|------------------------------------------------------------------------|----------------------------------------------------------------------------------------------|------------------------------------------------------------|
| Kovacsova, Zuzana        | Early Stage Researcher, Medical Physics                                | University College London                                                                    | United Kingdom of Great Britain and Northern Ireland (the) |
| Kovarovic, Kris          | Associate Professor of Human Evolution                                 | Durham University                                                                            | United Kingdom of Great Britain and Northern Ireland (the) |
| Kowalczyk, Céline        | PhD student                                                            | UHasselt/Ugent                                                                               | Belgium                                                    |
| Kowalczyk, Agnieszka     | PhD student in mathematics                                             | Jagiellonian University                                                                      | Poland                                                     |
| Kowalewski, Martin       | Director                                                               | Estacion Biologica Corrientes - Museo Argentino de Ciencias Naturales "Bernardino Rivadavia" | Argentina                                                  |
| Kozakiewicz, Thea        | Research Assistant                                                     | Eawag                                                                                        | Switzerland                                                |
| Kozanayi, Witness        | Postdoctoral Research Fellow (Environmental and Geographical Sciences) | University of Cape Town                                                                      | South Africa                                               |
| Kozelova, Ivana          | research scientist                                                     | Institute of Landscape Ecology, Slovak Academy of Sciences                                   | Slovakia                                                   |
| Koziol, Krystyna         | Research Assistant, Environmental Science                              | Gdansk University of Technology                                                              | Poland                                                     |
| Kozlowski, Jessica       | PhD. Microbiology and Biotechnology                                    | University of Vienna                                                                         | Austria                                                    |
| Kozlowski, Jan           | Professor/ecology and evolution                                        | Jagiellonian University                                                                      | Poland                                                     |
| Kraaijeveld, Ken         | Research fellow Evolutionary Biology                                   | Origins Center                                                                               | Netherlands (the)                                          |
| Kraemer, Robert          | Professor Emeritus/Exercise Physiology                                 | Southeastern Louisiana University                                                            | United States of America (the)                             |
| Kraemer, Benjamin        | Global change aquatic ecologist                                        |                                                                                              | Germany                                                    |
| Kraft, Philipp           | Environmental Science Researcher                                       | Justus Liebig University                                                                     | Germany                                                    |
| Kraft, Werner            | Research Assistant and Group Leader for Thermal Energy Storages        | German Aero Space Center                                                                     | Germany                                                    |
| KRAINOVIC, PEDRO         | researcher - Tropical Forest Sciences                                  | Deutsche Gesellschaft für Internationale Zusammenarbeit (GIZ) GmbH                           | Brazil                                                     |
| Krakowski, Vincent       | Grid and PV project manager                                            | HESPUL                                                                                       | France                                                     |
| Kral, Petr               | Professor                                                              | University of Illinois at Chicago                                                            | United States of America (the)                             |
| Kramar, Hans             | Senior Scientist in Spatial Planning and Regional Science              | Vienna University of Technology                                                              | Austria                                                    |
| Kramarz, Paulina         | associate professor, biology                                           | Jagiellonian University                                                                      | Poland                                                     |
| Kramer, Jos              | Evolutionary Biologist                                                 | University of Zurich                                                                         | Switzerland                                                |
| Kramer, Dr. Holger       | Head of Maritime Environment                                           | Institute of Shipping Economics and Logistics (ISL)                                          | Germany                                                    |
| Kramer, Gary             | President, Enlight42 / Health Physics                                  | Enlight42                                                                                    | Canada                                                     |
| Krämer, Dirk             | Dr. rer. nat. in Physics                                               | Schloss Hagerhof                                                                             | Germany                                                    |
| Kramer, PhD, John H.     | Principal Groundwater Geologist                                        | Privately Owned Corporation                                                                  | United States of America (the)                             |
| Kranas, Hanna            | PhD student in Bioinformatics                                          | Institute for Research in Biomedicine (IRB Barcelona)                                        | Spain                                                      |
| Krantz, David            | Doctoral Researcher                                                    | Arizona State University                                                                     | United States of America (the)                             |
| Krappmann, Oliver        | director / geologist                                                   | Gecko Namibia                                                                                | Namibia                                                    |
| Krasnow, Kevin           | Research and graduate faculty                                          | Teton Science Schools                                                                        | United States of America (the)                             |
| Krath Christensen, Søren | Master Student in Biology                                              | Copenhagen University                                                                        | Denmark                                                    |
| Kratina, Pavel           | Lecturer in Aquatic Ecology                                            | Queen Mary University of London                                                              | United Kingdom of Great Britain and Northern Ireland (the) |
| Krattenmacher, Jochen    | PhD Student, Physical Chemistry                                        | BIOCEV                                                                                       | Czech Republic (the)                                       |

|                             |                                                          |                                                                                               |                                                            |
|-----------------------------|----------------------------------------------------------|-----------------------------------------------------------------------------------------------|------------------------------------------------------------|
| Kräuchi, Norbert            | Division Leader Landscape & Waters                       | Department of Environment Canton Aargau                                                       | Switzerland                                                |
| Kraus, Andrea               | Biologist                                                | University of South Bohemia                                                                   | Czech Republic (the)                                       |
| Kraus, Brian                | Graduate Research Assistant in Plasma Physics            | Princeton University                                                                          | United States of America (the)                             |
| Kraus, Robert               | PI                                                       | University of Konstanz & Max Planck Institute for Animal Behavior                             | Germany                                                    |
| Kraus, Fred                 | Research Biologist                                       | University of Michigan                                                                        | United States of America (the)                             |
| Krause, Fayette             | WA Land Steward (ret.)                                   | The Nature Conservancy                                                                        | United States of America (the)                             |
| Krause, Bernie              | Soundscape Ecologist                                     | Wild Sanctuary                                                                                | United States of America (the)                             |
| Krause, Janina              | Scientific Coworker in Biomedicine                       | University of Osnabrueck                                                                      | Germany                                                    |
| Krause, Alexandra           | Physicist                                                | Freie Universität Berlin                                                                      | Germany                                                    |
| Krausmann, Elisabeth        | Principal Scientist                                      | European Commission Joint Research Centre                                                     | Italy                                                      |
| Krauss, Jochen              | Professor of Ecology                                     | University of Würzburg, Department of Animal Ecology and Tropical Biology                     | Germany                                                    |
| Kraut, Ann                  | Junior Researcher, Forest Ecology                        | University of Tartu                                                                           | Estonia                                                    |
| Krautzberger, Maria         | President                                                | German Environmental Agency - UBA                                                             | Germany                                                    |
| Krauze, Kinga               | Ecology                                                  | European Regional Centre for Ecohydrology PAS                                                 | Poland                                                     |
| Krawczyk, Wojciech          | PhD Environment                                          | National Research Institute of Animal Production                                              | Poland                                                     |
| Krebs, Katherine            | Communications Specialist                                | UCSF                                                                                          | United States of America (the)                             |
| Krebs, Isabel               | Postdoctoral Researcher (Theoretical Plasma Physics)     | DIFFER                                                                                        | Netherlands (the)                                          |
| Kreft, Holger               | Professor of Biodiversity, Macroecology and Biogeography | University of Göttingen                                                                       | Germany                                                    |
| Kreft, Peter                | Meteorologist                                            | Meteorological Service of New Zealand Limited                                                 | New Zealand                                                |
| Kreft, Stefan               | Academic lecturer and researcher in nature conservation  | Centre for Ecnics and Ecosystem Management, Eberswalde University for Sustainable Development | Germany                                                    |
| Kreiling, Agnes-Katharina   | PhD student; Freshwater ecology                          | University of Iceland and Hólar University                                                    | Iceland                                                    |
| KREITER, Serge              | Distinguished Professor                                  | Montpellier SupAgro                                                                           | France                                                     |
| Krell, Julian               | PhD Candidate                                            | Ruhr-Universität Bochum                                                                       | Germany                                                    |
| Kremer, Natacha             | researcher / evolutionary biology                        | CNRS/UCBL                                                                                     | France                                                     |
| Kreß, Aljoscha              | Post Doc, Biology                                        | Goethe University Frankfurt                                                                   | Germany                                                    |
| Krettek, Agnes              | Research assistant, soil chemistry                       | Soil science and land evaluation                                                              | Germany                                                    |
| Kreyling, Juergen           | Professor of Plant Ecology                               | University of Greifswald                                                                      | Germany                                                    |
| Krisai-Greilhuber, Irmgard  | Ao.-Univ.-Prof. / Mycology, Botany                       | Department of Botany and Biodiversity Research, University of Vienna                          | Austria                                                    |
| Krishna, Sampath            | CTO                                                      | Asthma & Allergy Specialists, PC                                                              | United States of America (the)                             |
| Kriska, Nadine              | Instructional Academic Staff-Biology                     | UW-Whitewater                                                                                 | United States of America (the)                             |
| Krist, Amy                  | Associate Professor                                      | University of Wyoming                                                                         | United States of America (the)                             |
| Kristensen, Torsten Nygaard | Professor, Evolutionary Biology                          | Aalborg University                                                                            | Denmark                                                    |
| Krofel, Miha                | Assistant Professor of Ecology                           | University of Ljubljana, Biotechnical Faculty, Dept. for Forestry                             | Slovenia                                                   |
| Kröger, Kerstin             | MPA Management Adviser / Marine Ecology                  | Joint Nature Conservation Committee                                                           | United Kingdom of Great Britain and Northern Ireland (the) |
| Kröger, Markus              | Associate Professor of development studies               | University of Helsinki                                                                        | Finland                                                    |

|                         |                                                                     |                                                                              |                                |
|-------------------------|---------------------------------------------------------------------|------------------------------------------------------------------------------|--------------------------------|
| Krogmeier, Katie        | Master's Student of Biology                                         | Appalachian State University                                                 | United States of America (the) |
| Krogseth, Ingjerd Sunde | Senior Scientist Environmental Chemistry                            | NILU - Norwegian Institute for Air Research                                  | Norway                         |
| Krohmer, Julia          | Scientific Coordination and Transfer                                | Senckenberg Gesellschaft für Naturforschung                                  | Germany                        |
| Krohn, Johannes         | Environmental consultant for lake restoration                       | KLS-Gewaesserschutz                                                          | Germany                        |
| Krolewski, Ralph        | MD, Academic Teaching Practice Family Medicine                      | University of Cologne                                                        | Germany                        |
| Kroll, Alexandra        |                                                                     | Oekotoxzentrum                                                               | Switzerland                    |
| Krolow, Tiago           | Professor/Zoology and biogeography                                  | Universidade Federal do Tocantins                                            | Brazil                         |
| Kroneisen, Meike        | Assistant Professor, cognitive Psychology                           | University of Koblenz-Landau                                                 | Germany                        |
| Krook-Riekkola, Anna    | Assistant professor in energy transition and energy system analysis | Luleå University of Technology                                               | Sweden                         |
| Kropp, Juergen          | Professor, head of urban transformation, physics, chemistry         | Potsdam Institute for Climate Impact Research                                | Germany                        |
| Krsinic, Frano          | Prof.dr.sc.                                                         | Institute of Oceanography and Fisheries, Split                               | Croatia                        |
| Krug, Cornelia          | Science Policy Liaison                                              | University of Zurich                                                         | Switzerland                    |
| Krug, Jean              | Dr                                                                  | IFSTTAR                                                                      | France                         |
| Kruitwagen, Astrid      | Evolutionary biologist                                              | University of Groningen                                                      | Netherlands (the)              |
| Krukons, Greg           | Assistant Professor - Biology                                       | Angelo State University                                                      | United States of America (the) |
| Krull, Alex             | Geologist                                                           | Parks Canada                                                                 | Canada                         |
| Krupovic, Mart          | Associate Professor (Microbiology/Virology)                         | Institut Pasteur                                                             | France                         |
| Kruse, Jakob            | PhD student in AI research                                          | Heidelberg University                                                        | Germany                        |
| Krushelnicky, Paul      | Ecologist                                                           | University of Hawaii                                                         | United States of America (the) |
| Krut, Louis             | Medicine                                                            | St. Louis University Retired                                                 | United States of America (the) |
| Krutein, Michelle       | Graduate Student in the Department of Pathology                     | University of Washington                                                     | United States of America (the) |
| Kruuk, Loeske           | Professor                                                           | Australian National University                                               | Australia                      |
| Kryazhimskiy, Sergey    | Assistant Professor in Ecology, Behavior and Evolution              | University of California, San Diego                                          | United States of America (the) |
| Krysko, Kenneth         | Science Instructor                                                  | IB school                                                                    | United States of America (the) |
| KRZISCH, Marine         | post-doctoral researcher                                            |                                                                              | United States of America (the) |
| ksentini, ines          | Biological control/ plant protection                                | Tunisian Olive Institute                                                     | Tunisia                        |
| Kubkowski, Piotr        | assistant professor, cultural studies                               | Institute of Polish Culture, University of Warsaw                            | Poland                         |
| Küblbeck, Martin        | Phd student, behavioral and population ecology                      | Max-Planck-Institute for Ornithology                                         | Germany                        |
| Kübler, Janet           | Senior Research Scientist / Marine Biology                          | California State University at Northridge                                    | United States of America (the) |
| Kuc, Michal             | PhD on earth sciences, geologist, geoarchaeologist                  | Freelance                                                                    | Poland                         |
| Kuchenreuther, Margaret | Associate Professor of Biology                                      | University of Minnesota Morris                                               | United States of America (the) |
| Kücklich, Marlen        | PhD Candidate in Behavioural Ecology                                | University of Leipzig and Max-Planck Institute for Evolutionary Anthropology | Germany                        |
| Kuczyński, Lechosław    | Associate Professor in Ecology                                      | Adam Mickiewicz University in Poznań                                         | Poland                         |
| Kudryashov, Alexei      | PhD Candidate in Mathematics                                        | University of Augsburg                                                       | Germany                        |
| Kuehnhammer, Kathrin    | PHD student, Ecohydrology                                           | TU Braunschweig                                                              | Germany                        |
| Kueltz, Dietmar         | Professor of Physiological Genomics                                 | University of California, Davis                                              | United States of America (the) |
| Kugler, Günter Anton    | Physics                                                             |                                                                              | Germany                        |
| Kuhfuß, Hanna           | Researcher & Project Manager                                        | Making Oceans Plastic Free e.V.                                              | Germany                        |

|                            |                                                                                   |                                                                               |                                                            |
|----------------------------|-----------------------------------------------------------------------------------|-------------------------------------------------------------------------------|------------------------------------------------------------|
| Kuhl, Matthias             | PhD candidate in physics - topic: photoelectrochemical energy conversion          | Technical University Munich, Walter Schottky Institute                        | Germany                                                    |
| Kühl, Susanne              | Biologist / PhD                                                                   | Ulm University                                                                | Germany                                                    |
| Kühl, Michael              | Professor of Biochemistry                                                         | Ulm University                                                                | Germany                                                    |
| Kuhlemann, Ilyas           | PhD Student, Scientific and Teaching Assistant, Biophysics                        | Institute of Physical Chemistry, Georg-August-University Göttingen            | Germany                                                    |
| Kühn, Ingolf               | Professor for Macroecology                                                        | Helmholtz Centre for Environmental Research - UFZ                             | Germany                                                    |
| Kühn, Peter                | Soil Sciences and Physical Geography                                              | eberhard Karls University of Tübingen                                         | Germany                                                    |
| Kuijk, Loes                | Science teacher                                                                   | Hogeschool Leiden                                                             | Netherlands (the)                                          |
| Kuijper, Dries             | Associate professor, Ecology                                                      | Mammal Research Institute, Polish Academy of Sciences                         | Poland                                                     |
| Kuijpers, Antoon           | Senior Scientist (emeritus) Marine Geology / Paleoceanography                     | Geological Survey of Denmark and Greenland (GEUS)                             | Denmark                                                    |
| Kuiken, Thijs              | Professor in Comparative Pathology                                                | Erasmus University Medical Centre , Rotterdam                                 | Netherlands (the)                                          |
| Kuiper, Jan                | Sustainability scientist                                                          | Stockholm Resilience Centre, Stockholm University                             | Sweden                                                     |
| Kujawa, Krzysztof          | Dr., Assoc. Professor, acting deputy director for research; ecology & agriculture | Institute for Agricultural and Forest Environment, Polish Academy of Sciences | Poland                                                     |
| Kukkola, Anna              | Post doc researcher in ecotoxicology                                              | University of Birmingham                                                      | United Kingdom of Great Britain and Northern Ireland (the) |
| Kulczak, Richard P.        | Lecturer, architectural technology and sustainability                             | University of Brighton                                                        | United Kingdom of Great Britain and Northern Ireland (the) |
| Kulikauskas, Andrius Jonas | Philosopher and Mathematician                                                     |                                                                               | Lithuania                                                  |
| Külköylüoğlu, Okan         | Academics/Hydrobiology                                                            | Bolu Abant İzzet Baysal University                                            | Turkey                                                     |
| Kullberg, Alyssa           | PhD Student                                                                       | University of Miami                                                           | United States of America (the)                             |
| Kullmann, Armin            | Scientist, Consultant, Entrepreneur, Cluster-Manager                              | BioRegio-Institut                                                             | Germany                                                    |
| Kumar, Janesh              | Scientist                                                                         | National Centre for Cell Science, Pune                                        | India                                                      |
| Kumar, Biju                | Professor and Head/Aquatic Biology & Fisheries                                    | University of Kerala                                                          | India                                                      |
| Kumar, Arkadeep            | ITRI-Rosenfeld postdoc/ Mechanical engineering and Environment Science            | Berkeley Lab                                                                  | United States of America (the)                             |
| Kumari, Dr.R.Vinolya       | Assistant professor in Botany                                                     | Silver jubilee College (A),                                                   | India                                                      |
| Kümmel, Stephan            | Professor of Physics                                                              |                                                                               | Germany                                                    |
| Kümmerle, Eberhard         | Physicist                                                                         | Forschungszentrum Jülich                                                      | Germany                                                    |
| Kun, Marcelo               | PHD in Biology                                                                    | Universidad Nacional del Comahue                                              | Argentina                                                  |
| Kundel, Dominika           | PhD Student Soil Sciences                                                         |                                                                               | Switzerland                                                |
| Kundrát, Martin            | Research Team Leader / Evolutionary Biodiversity                                  | Pavol Jozef Šafárik University in Košice                                      | Slovakia                                                   |
| Kunkel, Andreas            | Biology                                                                           | Museum für Naturkunde Berlin                                                  | Germany                                                    |
| Kunnathu George, Alex      | Assistant Professor of Forest Operations                                          | Paul Smith's College, NY                                                      | United States of America (the)                             |
| Kunz, Gernot               | Lecturer                                                                          | Karl Franzen University of Graz                                               | Austria                                                    |
| Kunz, Natalie              | Lecturer and scientist                                                            | University of Kaiserslautern                                                  | Germany                                                    |
| Kunzmann, Andreas          | Ecophysiology WG                                                                  | ZMT Leibniz Centre for Tropical Marine Research, Bremen                       | Germany                                                    |
| Kupai, David               | biologist/ ecologist                                                              | Universitiy of Debrecen                                                       | Hungary                                                    |

|                           |                                                                                           |                                                                          |                                                            |
|---------------------------|-------------------------------------------------------------------------------------------|--------------------------------------------------------------------------|------------------------------------------------------------|
| Kuper, Clara              | PhD Cognitive Neuroscience                                                                | Humboldt University Berlin                                               | Germany                                                    |
| Kuppel, Sylvain           | Postdoc                                                                                   | CNRS/IPGP & Irstea                                                       | France                                                     |
| Kupsch, Denis             | Conservation Biology                                                                      | Georg-August-Universität Göttingen                                       | Germany                                                    |
| Kupsjak, Jelena           | Teaching assistant, phd student, Anthropology                                             | University of Zadar, Department of Ethnology and Anthropology            | Croatia                                                    |
| Kuralt, Žan               | researcher                                                                                | Biotechnical Faculty, University of Ljubljana                            | Slovenia                                                   |
| Kurnaz, Levent            | Prof.                                                                                     | Bogazici University Center for Climate Change and Policy Studies         | Turkey                                                     |
| Kürster, Martin           | Astrophysicist                                                                            | Max Planck Institute for Astronomy                                       | Germany                                                    |
| Kurt, Güley               | Assoc. Prof. Dr / Marine Biology                                                          |                                                                          | Turkey                                                     |
| Kurz, Karl H.             | Gynecologist, Research in Reproductive Health, LARC, Long Acting Reversible Contraception | IRIR, International Research Institute of Reproduction                   | Germany                                                    |
| Kurze, Christoph          | Postdoc/Biology                                                                           | MLU Halle                                                                | Germany                                                    |
| Kusmanoff, Alex           | Research Fellow, ICON Science                                                             | RMIT University                                                          | Australia                                                  |
| Kutal, Miroslav           | researcher                                                                                | Department of Forest Ecology, Mendel University in Brno                  | Czech Republic (the)                                       |
| Kuyper, Thomas            | Professor emeritus                                                                        | Wageningen University                                                    | Netherlands (the)                                          |
| Kuzilmbila Yongo, Joachim | Searcher/ Fish farming/ Integrated systems Aquaculture - Agronomy                         | INERA                                                                    | Congo (the Democratic Republic of the)                     |
| Kuzniar, Arnold           | eScience Research Engineer                                                                | Netherlands eScience Center                                              | Netherlands (the)                                          |
| KUZNIK, Frédéric          | Professor, Director of CETHIL laboratory                                                  | INSA LYON                                                                | France                                                     |
| Kuzu, Istemi              | Academic / Chemistry                                                                      | Philipps-Universität Marburg, Fachbereich Chemie                         | Germany                                                    |
| Kvarnström, Marie         | senior programme officer                                                                  | Swedish Biodiversity Centre, Swedish University of Agricultural Sciences | Sweden                                                     |
| Kwasniewski, Slawomir     | Marine Biologist                                                                          | Institute of Oceanology Polish Academy of Sciences                       | Poland                                                     |
| Kwon, Ohkyung             | Postdoctoral Researcher in Physics                                                        | University of Chicago                                                    | United States of America (the)                             |
| Kylin, Henrik             | Full Professor                                                                            | Linköping University, Dept. Environmental Change                         | Sweden                                                     |
| Kythreotis, Andrew        | Senior Lecturer in Political and Social Geography                                         | University of Lincoln                                                    | United Kingdom of Great Britain and Northern Ireland (the) |
| La Manna, Gabriella       | Marine Ecology                                                                            | MARETERRA ONLUS                                                          | Italy                                                      |
| La Puma MD, John          | Founder, AGreenRx.com; Founder, ChefMD                                                    | Chef Clinic                                                              | United States of America (the)                             |
| La Torre, Giuseppe        | Professor of Occupational Medicine                                                        | Sapienza University of Rome                                              | Japan                                                      |
| Laanisto, Lauri           | Senior researcher in macroecology                                                         | Estonian University of Life Sciences                                     | Estonia                                                    |
| Labasque, Thierry         | Research Engineer                                                                         | CNRS                                                                     | France                                                     |
| Labaude, Sophie           | PhD, Research Engineer in ecology and evolution                                           | Ecole Normale Supérieure de Paris                                        | France                                                     |
| Labbe, Aurelie            | Adjunct                                                                                   | Murdoch University                                                       | Australia                                                  |
| Labeguere, Victor         | Arquitecto superior posgraduado en bioclimatismo y certificacion energetica por la UPC    | Labeguere arquitectura y urbanismo s.l.                                  | Spain                                                      |
| LaBella, Abigail Leavitt  | Postdoctoral Scholar                                                                      | Vanderbilt University                                                    | United States of America (the)                             |
| Labiak, Paulo             | Professor                                                                                 | Universidade Federal do Parana                                           | Brazil                                                     |
| LaBrie, Richard           | PhD candidate in biological oceanography                                                  | Université de Montréal                                                   | Canada                                                     |
| Labrousse, Sara           | Postdoctoral Associate                                                                    | Woods Hole Oceanographic Institution                                     | United States of America (the)                             |

|                           |                                                                             |                                                      |                                                            |
|---------------------------|-----------------------------------------------------------------------------|------------------------------------------------------|------------------------------------------------------------|
| Labrut, Sophie            | Veterinary pathologist                                                      | Labocea                                              | France                                                     |
| Laca, Emilio              | Professor in Quantitative Rangeland Ecology                                 | University of California, Davis                      | United States of America (the)                             |
| Lacassin, Robin           | Senior researcher                                                           | CNRS - Institut de Physique du Globe de Paris        | France                                                     |
| Lacava, Mariangeles       | Biologist                                                                   | Universidad de la República                          | Uruguay                                                    |
| LACHAAL, Fethi            | Dr                                                                          | Water Researches and Technologies Centre             | Tunisia                                                    |
| Lachapelle, Paul          | Professor                                                                   | Montana State University                             | United States of America (the)                             |
| LACHAUD, Jean-Paul        | Research Associate - Conservation of Biodiversity                           |                                                      | Mexico                                                     |
| Lachaux, Nicolas          | PhD student in Ecotoxicology                                                | Université de Lorraine                               | France                                                     |
| Lachenaud, Olivier        | Researcher, Botany                                                          | Meise Botanic Garden                                 | Belgium                                                    |
| Lachenbruch, Barbara      | Professor Emeritus                                                          | Oregon State University                              | United States of America (the)                             |
| Lachmuth, Susanne         | Habilitation candidate, Plant evolutionary ecology                          | Martin Luther University Halle Wittenberg            | Germany                                                    |
| Lachner, Robert           | research associate                                                          | University of Vechta                                 | Germany                                                    |
| Lachs, Liam               | ONE Planet Doctoral Candidate, School of Natural and Environmental Sciences | Newcastle University                                 | United Kingdom of Great Britain and Northern Ireland (the) |
| Lacoeuilhe, Aurelie       | Ecology                                                                     | Muséum national d'Histoire naturelle                 | France                                                     |
| LACOMBE, Catherine        |                                                                             | Observatoire de Paris                                | France                                                     |
| Lacoste, Marine           | Researcher in soil science                                                  | INRA                                                 | France                                                     |
| Lacoue-Labarthe, Thomas   | Ecotoxicology                                                               | CNRS / LIENSs Institute France                       | France                                                     |
| Lacroix, Vincent          | Associate professor in bioinformatics                                       | Université Lyon 1                                    | France                                                     |
| Ladin, Emily              | graduate student                                                            | California State University Northridge               | United States of America (the)                             |
| Ladio, Ana                | Researcher in Ethnobiology                                                  | INIBIOMA                                             | Argentina                                                  |
| Ladrón de Guevara, Mónica | Ecology                                                                     | Ecological and Forestry Applications Research Centre | Spain                                                      |
| LaDue, Chase              | PhD Candidate, Environmental Science and Policy                             | George Mason University                              | United States of America (the)                             |
| LaDuke, Thomas            | Associate Professor of Biological Sciences                                  | East Stroudsburg University                          | United States of America (the)                             |
| Ladyman, PhD, Juanita     | Botanist and Ecologist                                                      | JnJ Associates LLC                                   | United States of America (the)                             |
| Laeseke, Philipp          | PhD Student                                                                 | University of Bremen                                 | Germany                                                    |
| Laetz, Elise              | Research Scientist                                                          | Rijksuniversiteit Groningen                          | Netherlands (the)                                          |
| Lafage, Denis             | Postdoc in Ecology                                                          | University of Rennes 1                               | France                                                     |
| Lafayette, Lev            | Information Systems                                                         | University of Melbourne                              | Australia                                                  |
| Lafolie, Francois         | Chargé de Recherches                                                        | INRA                                                 | France                                                     |
| Lafrenière, David         | Professor of physics                                                        | University of Montreal                               | Canada                                                     |
| Lagace, Melia             | MSc Geography PhD candidate in Biology                                      | UQAM                                                 | Canada                                                     |
| Lagache, Guilaine         | Professor - Astronomy                                                       | Aix Marseille University                             | France                                                     |
| Lagerwall, Gareth         | University Lecturer / Researcher, Bioresources Engineering                  | University of KwaZulu-Natal                          | South Africa                                               |
| Lageson, Amanda           | Biochemistry (inorganic&organic oxygen demand)                              | MVTL; South Central, MN                              | United States of America (the)                             |
| Lagesse, Juliette         | Wetland Ecologist                                                           |                                                      | South Africa                                               |
| LAGET, Guillaume          | PhD, Mathematics                                                            | Université Grenoble Alpes                            | France                                                     |
| Laggan, Sophie            | Research fellow - participatory environmental decision making               | UWE Bristol                                          | United Kingdom of Great Britain and Northern Ireland (the) |
| Laglbauer, Betty          | Phd candidate                                                               | University of the Azores                             | Portugal                                                   |



|                            |                                                                     |                                                                                               |                                                            |
|----------------------------|---------------------------------------------------------------------|-----------------------------------------------------------------------------------------------|------------------------------------------------------------|
| Lagnado, Leon              | Professor of Neuroscience                                           | University of Sussex                                                                          | United Kingdom of Great Britain and Northern Ireland (the) |
| Lagroteria, Diogo          | Researcher                                                          | Instituto Chico Mendes de Conservação da Biodiversidade                                       | Brazil                                                     |
| Lague, Dimitri             | Senior Researcher, Earth Sciences                                   | CNRS-Geosciences Rennes                                                                       | France                                                     |
| Lagüela, Susana            | Head of the Catedra Iberdrola VIII Centenario                       | University of Salamanca                                                                       | Spain                                                      |
| Laguionie Marchais, Claire | Researcher in marine biology                                        | National University of Ireland, Galway                                                        | Ireland                                                    |
| Laguna, Eduardo            | Phd Student                                                         | Institute for Game and Wildlife Research                                                      | Spain                                                      |
| Laguna, Emilio             | Head of Section for Wild Plant Conservation                         | Generalitat Valenciana - Centre for Forestry Research and Experimentation                     | Spain                                                      |
| Lahoda, Marek              | PhD student, Climatology                                            | Masaryk University & Global Change Research Institute (CzechGlobe), Czech Academy of Sciences | Czech Republic (the)                                       |
| Lahr, Michael              | Professor                                                           | Rutgers, The State University of New Jersey                                                   | United States of America (the)                             |
| LaHue, Nathaniel           | Public Health                                                       | Wisconsin DHS                                                                                 | United States of America (the)                             |
| Lai, Hsin-Chih             | Chair                                                               | Department of green energy and environmental resources/ Chang Jung Christian University       | Taiwan                                                     |
| Laibach, Natalie           | PostDoc Sustainable Tech & Innovation Management                    | University of Bonn                                                                            | Germany                                                    |
| Laignel, Benoit            | Professor of the University                                         | University of Rouen Normandie                                                                 | France                                                     |
| Laimer, Tobias             | PhD Student, Global land ecosystem modelling                        | Karlsruhe Institute of Technology                                                             | Germany                                                    |
| Laine, Matias              | Academy Research Fellow, Accounting                                 | Tampere University                                                                            | Finland                                                    |
| Laine, Veronika            | Postdoctoral researcher                                             | Netherlands Institute of Ecology (NIOO-KNAW)                                                  | Netherlands (the)                                          |
| Laing, Ingrid              | Senior Research Fellow, Paediatric Respiratory Medicine             | Telethon Kids Institute, The University of Western Australia                                  | Australia                                                  |
| Laird, David               | Professor Emeritus                                                  | Iowa State University                                                                         | United States of America (the)                             |
| Laiet, Rafael              | Profesor                                                            | Universidad Simón Bolívar                                                                     | Venezuela (Bolivarian Republic of)                         |
| LAITUNG, Beryl             | Associate Professor / Plant Ecology                                 | University of Burgundy                                                                        | France                                                     |
| Lajbner, Zdeněk            | Postdoctoral Researcher                                             | Institute of Animal Physiology and Genetics, Czech Academy of Sciences                        | Czech Republic (the)                                       |
| LAJTHA, KATE               | Professor, Biogeochemistry                                          | Oregon State University                                                                       | United States of America (the)                             |
| Laker, Pip                 | Conservation Officer                                                | University of Exeter                                                                          | United Kingdom of Great Britain and Northern Ireland (the) |
| Lakhdar-Ghazal, Nouria     | Neuroscience                                                        | Mohammed V University                                                                         | Morocco                                                    |
| Lakhtakia, Akhlesh         | Evan Pugh University Professor of Engineering Science and Mechanics | Pennsylvania State University                                                                 | United States of America (the)                             |
| Lal, Prof Murari           | Techinal Head (Climate Change)                                      | RMSI                                                                                          | India                                                      |
| Lalander, Cecilia          | Associate Professor Environmental Engineering                       | Swedish University of Agricultural Sciences                                                   | Sweden                                                     |
| Lalechère, Etienne         | Postdoctoral researcher in ecology                                  | IRSTEA                                                                                        | France                                                     |
| Laloë, Francis             | Statistician                                                        | IRD (retired)                                                                                 | France                                                     |
| Lamanna, Christine         | Climate Change Scientist                                            | World Agroforestry                                                                            | Kenya                                                      |
| Lamarque, Laurent J.       | Postdoctoral fellow                                                 | INRA                                                                                          | France                                                     |
| Lamarre, Jean-Michel       | Directeur de Recherche Emerite, Astrophysics                        | Observatoire de Paris, Paris                                                                  | France                                                     |
| Lamas Herrera, Iker        | PhD student                                                         | UNIL                                                                                          | Switzerland                                                |

|                               |                                                          |                                                                   |                                                            |
|-------------------------------|----------------------------------------------------------|-------------------------------------------------------------------|------------------------------------------------------------|
| Lambers, Hans                 | Professor of Plant Ecology and Biology                   | University of Western Australia and China Agricultural University | Australia                                                  |
| Lambert, Joanna               | Professor of Environmental Studies                       | University of Colorado Boulder                                    | United States of America (the)                             |
| Lambert, Amaury               | Professor of Mathematics                                 | Sorbonne Université                                               | France                                                     |
| Lambert, Nicholas             | Physics                                                  | University of Otago                                               | New Zealand                                                |
| Lambert, Erwin                | Postdoc climate physics                                  | Utrecht University                                                | Netherlands (the)                                          |
| Lambertucci, Sergio           | Principal Researcher                                     | INIBIOMA                                                          | Argentina                                                  |
| Lambrechts, M.                | Evolutionary Ecologist                                   | CNRS                                                              | France                                                     |
| Lameira, Adriano              | Assistant Professor                                      | University of Warwick                                             | United Kingdom of Great Britain and Northern Ireland (the) |
| Lamentowicz, Mariusz          | Professor of Geography                                   | Adam Mickiewicz University in Poznań                              | Poland                                                     |
| Lamers, Carolien              | Consultant Clinical Psychologist                         | Bangor University                                                 | United Kingdom of Great Britain and Northern Ireland (the) |
| Lamichhane, Gyanu             | Biomedical Research                                      | Johns Hopkins University                                          | United States of America (the)                             |
| Lamine, Brahim                | Associate professor                                      | University Paul Sabatier                                          | France                                                     |
| Laming, Sven                  | Researcher                                               | University of Aveiro                                              | Portugal                                                   |
| Lamoree, Niek                 | PhD Student Mathematics                                  | Vrije Universiteit Amsterdam                                      | Netherlands (the)                                          |
| LAMOTHE, Alexis               | PhD                                                      | Institut des Géosciences de l'Environnement                       | France                                                     |
| Lampe, Leonie                 | Cognitive Science                                        | Macquarie University                                              | Australia                                                  |
| Lamy, Laurent                 | Astronomer                                               | Observatoire de Paris                                             | France                                                     |
| Lancien, Cécilia              | Researcher in Mathematics                                | Institut de Mathématiques de Toulouse & CNRS                      | France                                                     |
| Lancot, Richard               | Wildlife Biologist                                       |                                                                   | United States of America (the)                             |
| Lande, Russell                | Professor of Biology, Emeritus                           | University of California, San Diego                               | United States of America (the)                             |
| Landeira-Dabarca, Andrea      |                                                          | South Bohemia University                                          | Czech Republic (the)                                       |
| Landeiro, Victor              | Professor / Ecology                                      | Universidade Federal de Mato Grosso                               | Brazil                                                     |
| Landires, Erick               | Medical Critical Care                                    | Instituto de Ciencias Medicas                                     | Panama                                                     |
| Landires, Iván                | MD, PhD                                                  | Instituto de Ciencias Médicas                                     | Panama                                                     |
| Landivar Albis, Carlos Miguel | Ph.D. Researcher                                         | Universitää Freiburg                                              | Germany                                                    |
| Landmann, Johannes            | PhD student                                              | ETH Zurich                                                        | Switzerland                                                |
| Landsbergen, Kim              | Associate Professor of Biology and Environmental Science | Antioch College                                                   | United States of America (the)                             |
| Landsberger, Mariann          | Molecular Cell Biology                                   | University College Dublin                                         | United Kingdom of Great Britain and Northern Ireland (the) |
| Landuyt, Lisa                 | PhD candidate                                            | Ghent University                                                  | Belgium                                                    |
| Lane, Peter                   | Statistical Consultant                                   | Australian National University                                    | United Kingdom of Great Britain and Northern Ireland (the) |
| Lane, Guy                     | BSc (Hons) Environmental Science                         | Griffith University                                               | Australia                                                  |
| Lane, Peter                   | Physicist                                                | Illinois Institute of Technology                                  | United States of America (the)                             |
| Lane, David                   | Professor of Business Informatics                        | Henley Business School, University of Reading                     | United Kingdom of Great Britain and Northern Ireland (the) |
| Lang, Birgit                  | Postdoc                                                  | Senckenberg Museum of Natural History, Görlitz                    | Germany                                                    |
| Lang, Thierry                 | Professor in Public Health                               | Toulouse University                                               | France                                                     |

|                            |                                                                |                                                        |                                                            |
|----------------------------|----------------------------------------------------------------|--------------------------------------------------------|------------------------------------------------------------|
| Lang, Judith               | Scientific Coordinator                                         | Atlantic and Gulf Rapid Reef Assessment (AGRRA)        | United States of America (the)                             |
| Lang, Patricia             | Postdoc, Biology                                               | Stanford                                               | United States of America (the)                             |
| LANG, Michel               | Hydrologist                                                    | IRSTEA                                                 | France                                                     |
| Lange, Jens                | Professor of Hydrology                                         | University of Freiburg                                 | Germany                                                    |
| Lange, Ines                | Postdoctoral Research Fellow, coral reef ecology/geomorphology | University of Exeter                                   | United Kingdom of Great Britain and Northern Ireland (the) |
| Lange, Jörg                | PhD Limnology                                                  | CO2 Abgabe e.V.                                        | Germany                                                    |
| Langenberg, Julius         | Materials Engineering                                          | RWTH Aachen University                                 | Germany                                                    |
| Langendijk-Genevaux, Petra | Bioinformatician, scientific engineer, Microbiology            | CNRS - University of Toulouse                          | France                                                     |
| Langenfeld, Kathryn        | Doctoral Student, Environmental Engineering                    | University of Michigan                                 | United States of America (the)                             |
| Langer, Martin             | Professor of Paleontology                                      | Institut für Geowissenschaften, University of Bonn     | Germany                                                    |
| Langer, David              | Doctoral Student / Renewable Energy Distribution               | Ulm University of Applied Science                      | Germany                                                    |
| Langeveld, Joep            | PhD researcher Geochemistry                                    | Utrecht University/ PBL                                | Netherlands (the)                                          |
| Langhammer, Maria          | Scientist                                                      | Helmholtz Centre for Environmental Research GmbH - UFZ | Germany                                                    |
| Langhans, Simone Daniela   | Marie Curie Fellow                                             | University of Otago                                    | New Zealand                                                |
| Langhans, Kelley           | Biology PhD Student                                            | Stanford University                                    | United States of America (the)                             |
| Langille, Chris            | Principal and Director                                         | Northwind Enterprises Pty Ltd                          | Australia                                                  |
| Langley, Liam              | PhD Student - Seabird Ecology                                  | University of Exeter                                   | United Kingdom of Great Britain and Northern Ireland (the) |
| Langley, Chris             | Freelance science consultant                                   | Leverhulme Trust                                       | United Kingdom of Great Britain and Northern Ireland (the) |
| Langlois, Olivier          | Researcher / archaeology                                       | CNRS                                                   | France                                                     |
| Langridge, Holly           | Ecologist                                                      | University of Manchester                               | United Kingdom of Great Britain and Northern Ireland (the) |
| Lanigan, Liam              | Research Assistant, Palaeoproteomics                           | The Globe Institute, University of Copenhagen          | Denmark                                                    |
| Lanna, Flavia              | Ph.D. student                                                  | The Ohio State University                              | United States of America (the)                             |
| Lanna, Emilio              | Professor                                                      | Universidade Federal da Bahia                          | Brazil                                                     |
| LANNA, ANDRE               | Ecology                                                        | UFRJ                                                   | Brazil                                                     |
| Lanooij, Suzanne           | PhD student Neurobiology                                       | University of Groningen                                | Netherlands (the)                                          |
| Lansdown, Richard          | Chair, IUCN SSC Freshwater Plant Specialist Group              |                                                        | United Kingdom of Great Britain and Northern Ireland (the) |
| Lansø, Anne Sofie          | Researcher, Land surface modelling                             | LSCE (IPSL)                                            | France                                                     |
| Lanza, Guy                 | Research Professor                                             | SUNY ESF                                               | United States of America (the)                             |
| Lanzi Aló, Lia             | Estatística                                                    |                                                        | Brazil                                                     |
| Lanzoni-Mangutchi, Paola   | PhD student                                                    | Newcastle University                                   | United Kingdom of Great Britain and Northern Ireland (the) |
| Lapanja, Tjasa             | Predoctoral fellow                                             | EMBL                                                   | Italy                                                      |
| Laparie, Mathieu           | Research Scientist, Biology/Ecology                            | INRA                                                   | France                                                     |
| Lapeyra Martin, Jon        | PhD Student in Oceanography                                    | Université Libre de Bruxelles                          | Belgium                                                    |
| Lapiidus, Nathanael        | Assistant Professor, Statistics / Epidemiology                 | Sorbonne Université / Inserm                           | France                                                     |
| Laplaze, Laurent           | Directeur de Recherche, Plant Biology                          | IRD                                                    | France                                                     |

|                               |                                                                           |                                                                                      |                                                            |
|-------------------------------|---------------------------------------------------------------------------|--------------------------------------------------------------------------------------|------------------------------------------------------------|
| Lapo, Karl                    | Postdoctoral Researcher                                                   | University of Bayreuth                                                               | Germany                                                    |
| lapostolle, dany              | Assistant professor                                                       | Université de Bourgogne Franche-Comté                                                | France                                                     |
| Lappan, Susan                 | Associate Professor                                                       | Appalachian State University                                                         | United States of America (the)                             |
| Lara, Paloma                  | Postdoctoral researcher                                                   | Instituto de Biotecnología, UNAM                                                     | Mexico                                                     |
| Lara Romero, Carlos           | Postdoctoral researcher                                                   | Universidad Rey Juan Carlos                                                          | Spain                                                      |
| Lares, Marcelo                | Professor and researcher                                                  | CONICET - Universidad Nacional de Córdoba                                            | Argentina                                                  |
| Large, Mark                   | Assoc Professor                                                           | School of Animal and Environmental Science, Unitec, Auckland                         | New Zealand                                                |
| Larivera, Simone              | PhD Student                                                               | University of Regensburg                                                             | Germany                                                    |
| Lark, Murray                  | Professor of Environmetrics                                               | University of Nottingham                                                             | United Kingdom of Great Britain and Northern Ireland (the) |
| Larkin, Kate                  | Deputy Head EMODnet Secretariat, Marine Science                           | European Marine Observation and Data Network Secretariat, Seascope Belgium bvba      | Belgium                                                    |
| Laroche, Jean                 | Professor                                                                 | European Institute for Marine Studies                                                | France                                                     |
| Larouche, Richard             | Assistant Professor, Public Health                                        | University of Lethbridge                                                             | Canada                                                     |
| Larrabee, David               | Professor Emeritus of Physics                                             | East Stroudsburg University                                                          | United States of America (the)                             |
| Larraín-Barrios, Bárbara      | PhD (c) / Ecology                                                         | Universidad Nacional Autónoma de México                                              | Mexico                                                     |
| Larrat, Sylvain               | Wildlife veterinarian                                                     | Independent consultant                                                               | France                                                     |
| Larrea-Alcázar, Daniel        | Associate Researcher                                                      | Herbario Nacional de Bolivia, Instituto de Ecología, Universidad Mayor de San Andres | Bolivia (Plurinational State of)                           |
| Larridon, Isabel              | Researcher                                                                | Royal Botanic Gardens, Kew                                                           | United Kingdom of Great Britain and Northern Ireland (the) |
| Larrinaga, Asier R.           | Postdoc Researcher and Environmental Consultant, Ecology and Conservation | CSIC and eNeBaDa                                                                     | Spain                                                      |
| LARRONDO, SUSANA              | CHEMICAL ENGINEERING PhD                                                  | SCIENTIFIC AND TECNOLÓGICAL RESEARCH COUNCIL-CONICET                                 | Argentina                                                  |
| Larsen, Gregory               | Chemical                                                                  | University of Texas                                                                  | Portugal                                                   |
| Larson, Anne M                | Principal Scientist and Team Leader, Equity, Gender, Justice and Tenure   | Center for International Forestry Research (CIFOR)                                   | Peru                                                       |
| Larsson, Per                  | Associate Professor                                                       | Uppsala University                                                                   | Sweden                                                     |
| Larsson, Johan                | PhD student in Physical Resource Theory                                   | Chalmers University of Technology                                                    | Sweden                                                     |
| Larter, Steve                 | Professor of Geochemistry                                                 | University of Calgary                                                                | Canada                                                     |
| Larue, Fanny                  | Post-doctoral researcher - Cryosphere                                     | Institute of Environmental Geosciences                                               | France                                                     |
| LaRue, Michelle               | Lecturer                                                                  | University of Canterbury                                                             | New Zealand                                                |
| Laskar, Amzad Hussain         | Postdoctoral Fellow                                                       | Utrecht University                                                                   | Netherlands (the)                                          |
| Lasker, Howard                | Professor of Environment and Sustainability                               | University at Buffalo                                                                | United States of America (the)                             |
| Laskowski, Ryszard            | Professor in biology/ecology                                              | Jagiellonian University in Kraków                                                    | Poland                                                     |
| LASOU, Gauthier               | Decommissioning Engineer                                                  | CEA                                                                                  | France                                                     |
| Lasry Benchimol Reis, Luciana | Scientific Researcher                                                     | Agronomic Institute of Campinas                                                      | Brazil                                                     |
| Lassaletta, Luis              | Researcher / Sustainable agriculture                                      | Universidad Politécnica de Madrid                                                    | Spain                                                      |
| Lasser, Jana                  | PostDoc in Physics                                                        | Max Planck Institute for Dynamics and Self-Organization                              | Germany                                                    |

|                                |                                                              |                                                                                  |                                |
|--------------------------------|--------------------------------------------------------------|----------------------------------------------------------------------------------|--------------------------------|
| LASSO, CARLOS                  | Ph D Biology                                                 | Instituto de Investigación de Recursos Biológicos Alexander von Humboldt         | Colombia                       |
| LASSOIS, Ludivine              | Dr. Plant biology and pathology                              | Liège University, Gembloux Agro-Bio tech                                         | Belgium                        |
| Lasue, Jeremie                 | Astronomer                                                   | University of Toulouse                                                           | France                         |
| Lasuik, Jordan                 | Physics                                                      | University of Manitoba                                                           | Canada                         |
| László, Zoltán                 | Assistant professor                                          | Babes-Bolyai University                                                          | Romania                        |
| Latalowa, Malgorzata           | Professor/Earth Sciences, Biology                            | University of Gdansk                                                             | Poland                         |
| Latham, Roger                  | Ecologist / Conservation Biologist                           | continentalconservation.us                                                       | United States of America (the) |
| Latimer, Andrew                | Professor, Ecology/Plant Sciences                            | UC Davis                                                                         | United States of America (the) |
| Latinne, Alice                 | Research Scientist                                           | EcoHealth Alliance                                                               | United States of America (the) |
| Latorre, Claudio               | Professor                                                    | Pontificia Universidad Catolica de Chile                                         | Chile                          |
| Latouche, Morwena              | Assistant professor                                          |                                                                                  | France                         |
| LATOUCHE, Gwendal              | Biophysicist                                                 | Universite Paris-Sud                                                             | France                         |
| Lattorff, Michael              | Senior Scientist                                             | International Centre of Insect Physiology and Ecology                            | Kenya                          |
| Latz, Ellen                    | Post Doctoral Researcher                                     |                                                                                  | Germany                        |
| Latzel, Vít                    | senior researcher                                            | Institute of Botany of the Czech Academy of Sciences                             | Czech Republic (the)           |
| Laubichler, Manfred            | Complex Systems and Theoretical Biology                      | Arizona State University                                                         | United States of America (the) |
| Lauda-Rodriguez, Zenaida Luisa | PhD on Environmental Science                                 | University of São Paulo                                                          | Brazil                         |
| Laudet, Vincent                | Professor, Director of the Marine Station of Banyuls-sur-Mer | Sorbonne Universite                                                              | France                         |
| Laufer, Juliana                | Pos-doc                                                      | Michigan State University                                                        | Brazil                         |
| Laugen, Ane Timenes            | Professor of Marine Ecology                                  | Centre for Coastal Research, Department of Natural Sciences, University of Agder | Norway                         |
| Laukkanen, Sonja               | anthropology                                                 | Helsinki University                                                              | Finland                        |
| Laumann, Raúl                  | Researcher - Entomology                                      | Embrapa                                                                          | Brazil                         |
| Laumonier, Yves                | Associate Professor                                          | CIFOR                                                                            | Indonesia                      |
| Laundre, John                  | Assistant professor                                          | Western Oregon University                                                        | United States of America (the) |
| Launhardt, Ralf                | Astrophysicist                                               | Max Planck Institute for Astronomy                                               | Germany                        |
| Lauper, Bruno                  | Geologist                                                    | University of Fribourg                                                           | Switzerland                    |
| Lauper, Benedikt               | PhD Environmental Sciences                                   | Eawag Dübendorf                                                                  | Switzerland                    |
| Laura, Guerrero-Meseguer       | Postdoctoral researcher                                      | University of Porto                                                              | Portugal                       |
| Laurance, William              | Distinguished Professor                                      | James Cook University                                                            | Australia                      |
| Laureillard, Didier            | Medical Doctor                                               |                                                                                  | France                         |
| Laurent, Julien                | Associate Professor                                          | Ecole Nationale du Génie de l'Eau et de l'Environnement de Strasbourg            | France                         |
| LAURENT, Yann                  | Technician in ecological research                            | AGROCAMPUS OUEST                                                                 | France                         |
| LAURENT, Benoit                | Postdoc, forest pathology                                    | INRA                                                                             | France                         |
| Laurila, Anssi                 | Professor, Animal ecology                                    | Uppsala University                                                               | Sweden                         |
| Laurindo da Silva, Fabio       | Postdoctoral Fellow                                          | University of São Paulo                                                          | Brazil                         |
| Lauriola, Paolo                | Associate                                                    | Italian National Research Council                                                | Italy                          |
| Lautensach, Alexander          | Assoc. Professor, Education                                  | University of Northern British Columbia                                          | Canada                         |

|                       |                                                                  |                                                                                      |                                |
|-----------------------|------------------------------------------------------------------|--------------------------------------------------------------------------------------|--------------------------------|
| Lauvernet, Claire     | Researcher                                                       | IRSTEA                                                                               | France                         |
| Lauzeral, Christine   | Ecology                                                          | Université Paul Sabatier Toulouse                                                    | France                         |
| Lauzier, Benjamin     | associate professor                                              | Nantes university                                                                    | France                         |
| LaVal, Richard        | Founder and Owner                                                | The Bat Jungle                                                                       | Costa Rica                     |
| Laval Najid, sonia    | teacher / physics                                                | lycée Blaise pascal                                                                  | France                         |
| Lavanchy, Guillaume   | PhD Student, Evolutionary Biology                                | University of Lausanne                                                               | Switzerland                    |
| Lavanchy, Anne        | Professor Anthropology and social work                           | University of applied sciences and arts western Switzerland                          | Switzerland                    |
| Lavaniegos, Bertha E. | Researcher/Biological Oceanography                               | Centro de Investigación Científica y Educación Superior de Ensenada, Baja California | Mexico                         |
| laversenne, laetitia  | Researcher                                                       | CNRS - French National Center for Scientific Research                                | France                         |
| Lavoie, Isabelle      | Professor                                                        | INRS-ETE                                                                             | Canada                         |
| Lavoie, Janie         | Master degree in renewable resources                             | UQAC                                                                                 | Canada                         |
| Lavoie, Amy           | Biologie                                                         | Université du Québec à Chicoutimi                                                    | Canada                         |
| Lavorel, Sabine       | Assistant Professor in International Public Law                  | University Grenoble Alpes                                                            | France                         |
| Lavrov, Dennis        | Associate Professor                                              | Iowa State University                                                                | United States of America (the) |
| Law, Mikki            | MSc Ecology and Evolution                                        | University Bern                                                                      | Switzerland                    |
| Law, Beverly          | Professor of Global Change Biology & Terrestrial Systems Science | Oregon State University                                                              | United States of America (the) |
| Law, Peter R          | Research Associate, Mathematical Modeler                         | Centre for African Conservation Ecology, Nelson Mandela University                   | South Africa                   |
| Lawley, Jonathan      | PhD Candidate                                                    | Griffith University                                                                  | Australia                      |
| Lawrence, Cloverley   | Marine Scientist                                                 | National Parks                                                                       | South Africa                   |
| Lawrence, Deborah     | Professor of Environmental Sciences                              | University of Virginia                                                               | United States of America (the) |
| Lawrence, Mark        | Scientific Director                                              | Institute for Advanced Sustainability Studies e.V., Potsdam                          | Germany                        |
| Lawrence, Rick        | Professor Emeritus of Remote Sensing                             | Montana State University                                                             | United States of America (the) |
| Lawson, Caitlin       | PhD Candidate                                                    | Climate Change Cluster, University of Technology Sydney                              | Australia                      |
| Lawson, Sarah         | Assistant Professor                                              | Quinnipiac University                                                                | United States of America (the) |
| Lawson, Dawn M.       | Adjunct Faculty - Biology Department                             | San Diego State University                                                           | United States of America (the) |
| Lawson, Jennifer      | Executive Director                                               | Waikoloa Dry Forest Initiative                                                       | United States of America (the) |
| Lax, Judi             | Ph.D. student in Earth Sciences                                  | Tel Aviv University                                                                  | Israel                         |
| Layet, Jean-Marc      | Professor in Physics                                             | Aix-Marseille University                                                             | France                         |
| Layton, Katharine     | Urban Forester                                                   | Fairfax County Government                                                            | United States of America (the) |
| Lazo, Patricio X.     | PhD candidate                                                    | Universidad de Cuenca                                                                | Ecuador                        |
| Le Blond, Marie       | Research Associate                                               | Plant and Food research                                                              | New Zealand                    |
| LE BOHEC, Céline      | Researcher in Ecology & Evolution                                | CNRS ( France ) & Centre Scientifique de Monaco ( Monaco )                           | France                         |
| Le Boulengé, Éric     | Professor emeritus                                               | Université catholique de Louvain                                                     | Belgium                        |
| Le Bras, Zoé          | PhD                                                              | ETH                                                                                  | Switzerland                    |
| Le Breton, Tom        | PhD Candidate                                                    | University of New South Wales                                                        | Australia                      |

|                            |                                                        |                                                                    |                                |
|----------------------------|--------------------------------------------------------|--------------------------------------------------------------------|--------------------------------|
| Le Brigant, Alice          | Applied Mathematics                                    |                                                                    | France                         |
| Le Bris, Nadine            | Professor Marine Ecology                               | Sorbonne University                                                | France                         |
| Le Chevalier, Hugo         | Research Engineer                                      | CNRS                                                               | France                         |
| le Coarer, Etienne         | Research engineer                                      | Université Grenoble-Alpes                                          | France                         |
| Le Coeur, Didier           | Associate Professeur in Ecology                        | Agrocampus Ouest                                                   | France                         |
| Le Conte, Yves             | Senior Scientist                                       |                                                                    | France                         |
| Le Corre, Valérie          | Researcher, Plant Ecology                              | INRA                                                               | France                         |
| Le Cozannet, Goneri        | Coastal impacts                                        |                                                                    | France                         |
| Le Gall, Philomène         | PhD Student                                            | Université Grebogle Alpes                                          | France                         |
| Le Galliard, Jean-François | Ecology                                                | Centre national de la recherche scientifique                       | France                         |
| le Grange, Odette          | MSc Student                                            | University of Pretoria                                             | South Africa                   |
| Le Lann, Cécile            | Associate professor in Ecology                         | University of Rennes 1                                             | France                         |
| Le Luyer, Diane            | PhD Geography                                          | Université de Rouen - CNRS UMR 6266 IDEES                          | France                         |
| Le Magueresse, Corentin    | Research Scientist, Neurobiology                       | INSERM                                                             | France                         |
| Le Maitre, David           | Principal Researcher - Hydrological Ecosystem Services | Bidiversity & Ecosytem Services, Smart Places, CSIR                | South Africa                   |
| Le Meur, Hervé             | Applied mathematics                                    | CNRS                                                               | France                         |
| Le Moan, Alan              | PhD in evolutionary biology                            | University of Gothenburg                                           | France                         |
| Le mouélic, Stéphane       | Research engineer                                      | Cnrs                                                               | France                         |
| Le Noac'h, Philippe        | PhD student in limnology                               | UQAM                                                               | Canada                         |
| Le pape, Olivier           | Professor in marine ecology                            | Agrocampus ouest                                                   | France                         |
| Le Roux, Christine         | Microbiology                                           | CIRAD                                                              | France                         |
| Le Roux, Gael              | directeur de recherche - Isotope Biogeochemistry       | CNRS Université de Toulouse                                        | France                         |
| Le Roux, Vincent           | Lecturer                                               | EDYSAN, UMR CNRS 7058, UPJV                                        | France                         |
| LE ROUX, Christophe        | Searcher/Chemistry                                     |                                                                    | France                         |
| Le Roy, Benjamin           | PhD student in Urban Climatology                       | Centre National de Recherches Météorologiques                      | France                         |
| Le Sommer, Julien          | Research Scientist / Physical Oceanography             | CNRS                                                               | France                         |
| Le Tacon, François         |                                                        | INRA Institut National de la Recherche Agronomique                 | France                         |
| Le Tiec, Alexandre         | Astrophysicist                                         | Paris Observatory                                                  | France                         |
| Le Vaillant, Justine       | PhD student                                            | EBD-CSIC                                                           | Spain                          |
| Le Viol, Isabelle          | Researcher - Conservation biologist                    | Museum national d'Histoire naturelle                               | France                         |
| Lea, Mary-Anne             | Professor in Marine/Polar Predator Ecology             | Institute for Marine and Antarctic Studies, University of Tasmania | Australia                      |
| Lea, Susan                 | Professor of Physics and Astronomy                     | San Francisco State University                                     | United States of America (the) |
| leal, Cecília              | Postdoctoral researcher                                | University of São Paulo                                            | Brazil                         |
| Leal, Camille V.           | Post-Doc in Genetics                                   | Universidade Federal do Rio de Janeiro                             | Brazil                         |
| Leal, Inara                | Associate Professor                                    | Universidade Federal de Pernambuco                                 | Brazil                         |
| Leal, M Sheila             | postdoctoral researcher                                | Complutense University of Madrid                                   | Spain                          |
| Leal, Camille Victória     | Researcher                                             | Universidade Federal do Rio de Janeiro                             | Brazil                         |
| Leal Meca, María           |                                                        | CEDEX                                                              | Spain                          |
| Leauthaud, Alexie          | Astrophysics                                           | UCSC                                                               | United States of America (the) |

|                        |                                                                     |                                                                            |                                                            |
|------------------------|---------------------------------------------------------------------|----------------------------------------------------------------------------|------------------------------------------------------------|
| Lebel, Thierry         | Hydro-climatologist                                                 | IGE - IRD                                                                  | France                                                     |
| Leberger, Roxanne      | Dr                                                                  |                                                                            | France                                                     |
| leblanc, karine        | Oceanographer                                                       | CNRS                                                                       | France                                                     |
| Leblans, Paul          | Innovation Manager                                                  | Agfa NV                                                                    | Belgium                                                    |
| Leblois, Arthur        | Researcher, Neuroscience                                            | CNRS / University of Bordeaux                                              | France                                                     |
| Leblois, Raphaël       | Researcher, ecology and evolution                                   | French national institute for agronomical and environmental research INRAE | France                                                     |
| Leboulleux, Lucie      | Astronomy                                                           | Observatoire de Paris-Meudon                                               | France                                                     |
| Lebouvier, Marion      | PhD fellow, marine biology                                          |                                                                            | France                                                     |
| Lebreton, Sebastien    | PhD Biology                                                         | CNRS                                                                       | France                                                     |
| Lebugle, Maxime        | Optical scientist                                                   | Paul Scherrer Institute                                                    | Switzerland                                                |
| Lecharlier, Aurore     | PhD in analytical environmental chemistry                           | IPREM - UPPA                                                               | France                                                     |
| Lecina-Diaz, Judit     | predoctoral researcher                                              | CREAF                                                                      | Spain                                                      |
| Leclaire, Sarah        | Researcher in Evolutionary Biology                                  | CNRS - Toulouse                                                            | France                                                     |
| Leclerc, Camille       | PhD student in ecology                                              |                                                                            | France                                                     |
| Leclercq, Samuel       | Physicist in Radioastronomy                                         | IRAM                                                                       | France                                                     |
| Lecocq, Thomas         | Associate professor (senior lecturer) in animal biology and ecology |                                                                            | France                                                     |
| Lecomte, Jane          | Professor of Ecology                                                | University Paris-Sud Paris-Saclay                                          | France                                                     |
| Lecomte, claude        | professor                                                           | universite de lorraine                                                     | France                                                     |
| Leconte, Jeremy        | Astrohysicist                                                       | CNRS                                                                       | France                                                     |
| Lecorps, Benjamin      | PhD position Applied Biology                                        | UNiversity of British Columbia                                             | Canada                                                     |
| Lecours, Vincent       | Assistant Professor of Marine Remote Sensing and Spatial Analysis   | University of Florida                                                      | United States of America (the)                             |
| Leder, Stephanie       | Researcher, Development Studies/ Geography                          | Swedish University of Agricultural Sciences                                | Germany                                                    |
| Ledermann, Florian     | Researcher                                                          | Technische Universität Wien                                                | Austria                                                    |
| Ledesma, José L. J.    | Postdoctoral Researcher - Catchment biogeochemistry                 | Spanish National Research Council                                          | Spain                                                      |
| LEDESMA VAZQUEZ, JORGE | EMERITUS PROFESSOR GEOLOGY                                          | UABC                                                                       | Mexico                                                     |
| Ledoux, Jean-Baptiste  | Associate Researcher                                                | CIIMAR                                                                     | Portugal                                                   |
| Lee, Terrie            | Adjunct Faculty; Research Hydrologist US Geological Survey, Retired | St Petersburg College                                                      | United States of America (the)                             |
| Lee, Phyllis           |                                                                     | University of Stirling                                                     | United Kingdom of Great Britain and Northern Ireland (the) |
| Lee, Ee Ling           | Environmental Policy and governance                                 |                                                                            | Malaysia                                                   |
| Lee, William           | Conservation ecologist                                              | Manaaki Whenua Landcare Research                                           | New Zealand                                                |
| Lee, Kirsty            |                                                                     | University of Greenwich                                                    | United Kingdom of Great Britain and Northern Ireland (the) |
| Lee, Brian C.          | Toxicologist                                                        | Good Afternoon Toxicology Consulting, LLC                                  | United States of America (the)                             |
| Lee, Junbeom           | Ph.D                                                                | Johannes Gutenberg-University Mainz                                        | Germany                                                    |
| Lee, Matthew           | Associate Professor Marine Ecology                                  | Centro i mar, Universidad de Los Lagos                                     | Chile                                                      |
| Lee, Alan              | Editor: Ostrich Journal of African Ornithology                      | Cape Town University; University of KwaZulu Natal                          | South Africa                                               |
| Lee, Jiwoo             | Scientist / Atmospheric Science                                     | Lawrence Livermore National Laboratory                                     | United States of America (the)                             |



|                           |                                                             |                                                           |                                                            |
|---------------------------|-------------------------------------------------------------|-----------------------------------------------------------|------------------------------------------------------------|
| LEE, CHAN WON             | EMERITUS PROFESSOR                                          | KYUNGNAM UNIVERSITY                                       | Korea (the Republic of)                                    |
| Lee-Cruz, Larisa          | Ecology                                                     |                                                           | Mexico                                                     |
| Leeman-Neill, Rebecca     | Assistant Professor, Pathology and Cell Biology             | Columbia University Medical Center                        | United States of America (the)                             |
| Leer, Jaak                | Professor                                                   | Tallinna Kodukirurgia Eraülikool                          | Estonia                                                    |
| Lefebvre, Wouter          | Researcher on air pollution                                 | VITO                                                      | Belgium                                                    |
| Lefevre, Jeanne           | PhD student, signal processing                              | Gipsa-Lab                                                 | France                                                     |
| Lefèvre, Julien           | Associate Prof in Computer Science                          | Aix-Marseille Université                                  | France                                                     |
| Lefèvre, Sophie           | Ecology                                                     |                                                           | France                                                     |
| Legendre, Louis           | Professor Emeritus                                          | Sorbonne University                                       | France                                                     |
| Legendre, Frédéric        | Associate Professor - Evolutionary Biology                  | Museum national d'Histoire naturelle, Paris               | France                                                     |
| Leger, Adrien             | Postdoc in Bioinformatics                                   | EMBL-EBI                                                  | United Kingdom of Great Britain and Northern Ireland (the) |
| Leger, Elsa               | Postdoctoral researcher / Ecology and Evolution             | Royal Veterinary College                                  | United Kingdom of Great Britain and Northern Ireland (the) |
| Léger, Théo               | Scientific Head of the Lepidoptera Collection               | Museum fuer Naturkunde                                    | Germany                                                    |
| Leglise, Joris            | Engineer in atmospheric science                             |                                                           | France                                                     |
| LEGRAND, PIERRE           | Biologist                                                   | Synchrotron-SOLEIL                                        | France                                                     |
| LEGROS, Claude            | University physicist retired                                | Toulouse university                                       | France                                                     |
| Lehar, Mark               | Professional Geoscientist; Certified Professional Geologist | Bifrost Environmental and Remediation Services Inc.       | Canada                                                     |
| Lehikoinen, Petteri       | PhD candidate in Ecology and Evolutionary Biology           | Finnish Museum of Natural History, Univeristy of Helsinki | Finland                                                    |
| Lehikoinen, Aleksi        | Academy Research Fellow                                     | Finnish Museum of Natural History                         | Finland                                                    |
| Lehmann, Julia            | Reader in Life Sciences                                     | University of Roehampton                                  | United Kingdom of Great Britain and Northern Ireland (the) |
| Lehmann, Patrick          | Humanmedizin                                                | Gießen                                                    | Germany                                                    |
| Lehmann, Katja            | Microbial Ecologist                                         | UK Centre for Ecology and Hydrology                       | United Kingdom of Great Britain and Northern Ireland (the) |
| Lehmkuhl, Dr. med. Dieter | retired psychiatrist                                        | German health and climate Alliance (KLUG)                 | Germany                                                    |
| Lehr, Christian           | research assistant                                          | TU Dortmund University Chair of Fluidics                  | Germany                                                    |
| Lehtinen, Sami            | Postdoctoral researcher                                     | University of Jyväskylä                                   | Finland                                                    |
| Leid, Jeff                | Ph.D. Biotechnology/Medical Devices                         |                                                           | United States of America (the)                             |
| Leidenberger, Sonja       | Associate Senior Lecturer in Bioscience                     | School of Bioscience, University of Skövde                | Sweden                                                     |
| Leigh, Mary Beth          | Professor of Microbiology                                   | University of Alaska Fairbanks                            | United States of America (the)                             |
| Leinfelder, Reinhold      | Full Professor, Geology, Geobiology, Anthropocene Studies   | Freie Universität Berlin, Dept. Geologicaal Sciences      | Germany                                                    |
| Leinss, Silvan            | Scientist                                                   | ETH Zürich                                                | Switzerland                                                |
| Leip, Adrian              | Food Systems                                                | European Commission - Joint Research Centre               | Italy                                                      |
| Leis, Jeffrey             | Adjunct Professor, Marine Biologist                         | University of Tasmania                                    | Australia                                                  |
| Leite, Yuri               | Professor                                                   | Universidade Federal do Espirito Santo                    | Brazil                                                     |
| Leite, Renata             | Reseach Associate                                           | Duke University                                           | United States of America (the)                             |
| Leith, Mandy              | Science communications                                      | Ocean Networks Canada                                     | Canada                                                     |

|                         |                                                       |                                                                                  |                                                            |
|-------------------------|-------------------------------------------------------|----------------------------------------------------------------------------------|------------------------------------------------------------|
| Leitner, Wolfgang       | Professor of Production Management and Logistics      | Carinthia University of Applied Science                                          | Austria                                                    |
| Leitner, Melissa        | Actuary                                               | Institute & Faculty of Actuaries UK                                              | Switzerland                                                |
| Lejeune, Benjamin       | Scientific collaborator (PhD)                         | University of Liège                                                              | Belgium                                                    |
| Lejeusne, Christophe    | Associate Professor                                   | Aix-Marseille University                                                         | France                                                     |
| Lejman, Mariusz         | Postdoc researcher/Physics                            | Commissariat à l'énergie atomique et aux énergies alternatives (CEA)             | France                                                     |
| Leles, Suzana           | PhD Student                                           | Swansea University                                                               | Brazil                                                     |
| Lellei-Kovács, Eszter   | research fellow/ecology and geo-informatician         | MTA Centre for Ecological Research                                               | Hungary                                                    |
| Lemaux, Peggy G.        | Faulty, Plant and Microbial Biology                   | University of California, Berkeley                                               | United States of America (the)                             |
| Lemay, Audrey           | Postdoctoral researcher in forest ecology             | Université du Québec à Chicoutimi                                                | Canada                                                     |
| Lemes, Maristerra       | Permanent Researcher                                  | Instituto Nacional de Pesquisas da Amazonia (INPA)                               | Brazil                                                     |
| Lemes Martins, Rodrigo  | Professor                                             | Instituto de Biodiversidade e Sustentabilidade                                   | Brazil                                                     |
| Lemieux, Chris          | Associate Professor                                   | Wilfrid Laurier University                                                       | Canada                                                     |
| Lemieux, Julie          | Biologiste                                            |                                                                                  | Canada                                                     |
| Lemmen, Carsten         | Marine ecology                                        | Helmholtz-Zentrum Geesthacht                                                     | Germany                                                    |
| Lemmens, Christian      | Graduate student Astronomy & Astrophysics             | University of Amsterdam                                                          | Netherlands (the)                                          |
| Lemoine, Anthony        | PhD candidate in Hydroclimatology                     | Irstea                                                                           | France                                                     |
| Lemon, Hannah           | Laboratory Manager                                    | Edinburgh University                                                             | United Kingdom of Great Britain and Northern Ireland (the) |
| LEMONNIER, Gildas       | Field Engineer                                        | CNRS                                                                             | France                                                     |
| LEMOS, LISLEY           | Researcher                                            | INSTITUTO DE DESENVOLVIMENTO SUSTENTÁVEL MAMIRAUÁ                                | Brazil                                                     |
| LENA, Philippe          | Emeritus Researcher, geographer                       | IRD/National Museum of Natural History                                           | France                                                     |
| Lenfant, Philippe       | Professor - Marine Fish Ecology                       | University of Perpignan                                                          | France                                                     |
| Lenferink, Wouter       | PhD Candidate                                         | Radboud University                                                               | Netherlands (the)                                          |
| Lengyel, Attila         | senior lecturer in sustainability and tourism         | University of Debrecen                                                           | Hungary                                                    |
| Lenihan, James          | Research Vegetation Ecologist                         | USDA Forest Service (Retired)                                                    | United States of America (the)                             |
| Lenk, Thomas            | Vicepresident University Leipzig/Prof. Public finance | Leipzig University                                                               | Germany                                                    |
| Lennard, Patrick        | Graduate Student, Infectious Diseases and One Health  | University of Edinburgh                                                          | Australia                                                  |
| Lenoir, Jonathan        | Researcher in Ecology                                 | CNRS based at Université de Picardie Jules Verne                                 | France                                                     |
| Lenz, Claudia           | Research assistant                                    | Eberswalde University for Sustainable Development                                | Germany                                                    |
| Lenzen, Manfred         | School of Physics                                     | The University of Sydney                                                         | Australia                                                  |
| Lenzner, Bernd          | Post-doctoral researcher                              | University of Vienna                                                             | Austria                                                    |
| Léo, Michel             | PhD student                                           | Sorbonnes Université                                                             | France                                                     |
| León, Lorenzo           | Tenured Scientist / Olive Breeding                    | Andalusian Institute of Agricultural and Fisheries Research and Training (IFAPA) | Spain                                                      |
| León-Rojas, Juan-Miguel | Senior Lecturer in Applied Mathematics                | University of Extremadura                                                        | Spain                                                      |
| Leonard, Jennifer       | biologist                                             | Estación Biológica de Doñana, CSIC                                               | Spain                                                      |
| Leonard, Bachman        | Architecture                                          | University of Houston RETIRED                                                    | United States of America (the)                             |
| Leonardi, Jacques       | Professor of Sustainable Logistics                    | University of Westminster                                                        | United Kingdom of Great Britain and Northern Ireland (the) |
| Leonhardt, Sara         | Group leader                                          | University of Würzburg                                                           | Germany                                                    |

|                          |                                                            |                                                                  |                                                            |
|--------------------------|------------------------------------------------------------|------------------------------------------------------------------|------------------------------------------------------------|
| Leote, Catarina          | Former Oceanography Scientist/present Science Communicator |                                                                  | Portugal                                                   |
| Lepczyk, Christopher     | Professor                                                  | Auburn University                                                | United States of America (the)                             |
| Lepennetier, Gildas      | Bioinformatics                                             | TUM                                                              | Germany                                                    |
| Lerman, Cécile           | Researcher in Medical Imaging                              | CEA                                                              | France                                                     |
| Leroy, Valeriane         | Research director                                          | Inserm                                                           | France                                                     |
| Leroy, Céline            | Researcher                                                 | IRD                                                              | France                                                     |
| Leroy, Boris             | Lecturer                                                   | Muséum National d'Histoire Naturelle                             | France                                                     |
| Leroy, Thibault          | Postdoctoral researcher - Evolutionary biology             | ISEM, Univ. Montpellier                                          | France                                                     |
| Lertzman, Ken            | Professor of Resource and Environmental Management         | Simon Fraser University                                          | Canada                                                     |
| Lesage, Philippe         | Assistant profesor, Earth Science                          | Université Savoie Mont Blanc                                     | France                                                     |
| Leslie, Sarah            | Astronomy                                                  | Max Planck Institute for Astronomy                               | Germany                                                    |
| Lessard, Jean            | Emerittus Professor                                        | Université de Sherbrooke                                         | Canada                                                     |
| Lestak, Leanne           | Professional Scientist II                                  | University of Colorado, Institute for Arctic and Alpine Research | United States of America (the)                             |
| Lester, Jack             | PhD Candidate                                              | Max Planck Institute for Evolutionary Anthropology               | Germany                                                    |
| Lester, Andy             | Head of UK Conservation                                    | A Rocha UK                                                       | United Kingdom of Great Britain and Northern Ireland (the) |
| Lesur, Maxime            | Associate Professor of Physics                             | Lorraine University                                              | France                                                     |
| Letaief, Sarah           | Master student                                             | Institut des Sciences de le la mer de Rimouski                   | Canada                                                     |
| Letardi, Agostino        | Senior researcher                                          | ENEA                                                             | Italy                                                      |
| Letelier, Ricardo        | Professor of Oceanography                                  | Oregon State University                                          | United States of America (the)                             |
| Letschert, Jonas         | PhD Student                                                | Thuenen Institute for Sea Fisheries                              | Germany                                                    |
| Lettice, Eoin            | Lecturer, Plant Science                                    | University College Cork                                          | Ireland                                                    |
| Leu, Eva                 | Senior Scientist, Marine Biology                           | Akvaplan-niva                                                    | Norway                                                     |
| Leube, Bettina           | Medicine                                                   |                                                                  | Germany                                                    |
| Leuch, Corina            | Geography (Bsc)                                            | University of Zuricha                                            | Switzerland                                                |
| Leurs, Guido             | PhD. candidate - Marine Conservation Ecology               | University of Groningen                                          | Netherlands (the)                                          |
| Leutenegger, Anne-Louise | Researcher in human genetics                               | Inserm                                                           | France                                                     |
| Leuthold, Luc Alexis     | Chemist                                                    |                                                                  | France                                                     |
| Leuzinger, Sebastian     | Associate Professor                                        | Auckland University of Technology                                | New Zealand                                                |
| Levade, Inès             | PhD candidate in Biology                                   | Université de Montreal                                           | Canada                                                     |
| Leventhal, Sarah         | PhD student in paleontology                                | University of Colorado                                           | United States of America (the)                             |
| Leveque, Lucile          | PhD candidate/Conservation ecology                         | University of Tasmania                                           | Australia                                                  |
| Leverkus, Alexandro B    | Researcher, Ecology and Forestry                           | University of Granada                                            | Spain                                                      |
| Levers, Christian        | Postdoctoral Research Fellow                               | Helmholtz Centre for Environmental Research - UFZ                | Germany                                                    |
| Levi, Dr. Adi            | Enviromental sciences                                      | Achva academic college                                           | Israel                                                     |
| Levi, Taal               | Associate Professor Fisheries and Wildlife                 | Oregon State University                                          | United States of America (the)                             |
| Levikov, Nika            | EU Project Officer                                         | University of Malta                                              | Malta                                                      |
| Levin, Maureece          | Archaeology                                                | Stanford University                                              | United States of America (the)                             |

|                            |                                                                                        |                                                                      |                                                            |
|----------------------------|----------------------------------------------------------------------------------------|----------------------------------------------------------------------|------------------------------------------------------------|
| Levis, Carolina            | Postdoc in the Graduate Program in Ecology                                             | Universidade Federal de Santa Catarina                               | Brazil                                                     |
| Levy, David                | President                                                                              | Levy Research Services Ltd.                                          | Canada                                                     |
| Levy-Marchal, Claire       | MC, scientist, clinical research                                                       | INSERM                                                               | France                                                     |
| Lewandowski, Jörg          | Senior Scientist, Ecohydrology                                                         | Leibniz Institute of Freshwater Ecology and Inland Fisheries (IGB)   | Germany                                                    |
| Lewczuk, Nuria             | Researcher / Biologist                                                                 | INTA                                                                 | Argentina                                                  |
| Lewinsohn, Thomas          | Professor of Ecology                                                                   | University of Campinas (UNICAMP)                                     | Brazil                                                     |
| Lewis, Charlotte           | MSc Marine Biologist                                                                   |                                                                      | United Kingdom of Great Britain and Northern Ireland (the) |
| Lewis, Patrick             | Herbarium Curator/ Botanist                                                            | UWI Herbarium, Mona, University of the West Indies, Mona.            | Jamaica                                                    |
| Lewis, Rick                | Professor of Structural Biology                                                        | Newcastle University                                                 | United Kingdom of Great Britain and Northern Ireland (the) |
| Lewis, Ryan                | Marine Ecologist                                                                       | Institute of Marine and Antarctic Studies                            | Australia                                                  |
| Lewis, Ladonna             | Professor                                                                              | Glendale Community College, AZ                                       | United States of America (the)                             |
| Lewison, Rebecca           | Professor of Ecology                                                                   | San Diego State University                                           | United States of America (the)                             |
| Leyer, Ilona               | Prof. Dr.                                                                              | Geisenheim University                                                | Germany                                                    |
| Leyshon, Catherine         | Associate Professor of Geography                                                       | University of Exeter                                                 | United Kingdom of Great Britain and Northern Ireland (the) |
| Leyvraz Waltz, Francois    | Full Professor                                                                         | Institute of Physical Sciences—Autonomous University of Mexico       | Mexico                                                     |
| Lhano, Marcos              | Associate Professor                                                                    | Universidade Federal do Reconcavo da Bahia (UFRB)                    | Brazil                                                     |
| Lhosmot, Alexandre         | Doctorant                                                                              | Chrono-Environnement                                                 | France                                                     |
| Li, Jiahang                | Doctor                                                                                 | Peking University                                                    | China                                                      |
| Li, Roman                  | Postdoc/ Toxicology                                                                    | EAWAG                                                                | Switzerland                                                |
| Liamou, Evdokia            | Psychologist                                                                           | Aristotelian University of Thessaloniki                              | Greece                                                     |
| Lianos, Theodore P.        | Professor of Political Economy                                                         | Athens University of Economics and Business                          | Greece                                                     |
| Libbrecht, Romain          | Assistant Professor                                                                    | Johannes Gutenberg University of Mainz                               | Germany                                                    |
| liberman, ron              | phd student                                                                            | school of zoology, faculty of life sciences at Tel Aviv university   | Israel                                                     |
| Libertelli, Marcela        | Scientific researcher and head of the Department of Biology of Antarctic Top Predators | Argentinian Antarctic Institute                                      | Argentina                                                  |
| Libertelli, Marcela Monica | Head of the Top Predators Department                                                   | Argentine Antarctic Institute                                        | Argentina                                                  |
| Libois, Roland             | Prof. Zoology                                                                          | University Liège                                                     | Belgium                                                    |
| Libralato, Noemi           | Ecologist                                                                              |                                                                      | Italy                                                      |
| Libralato, Simone          | Scientist, Marine ecology                                                              | Istituto Nazionale di Oceanografia e di Geofisica Sperimentale - OGS | Italy                                                      |
| Lichtenstein, Gabriela     | Researcher                                                                             | CONICET                                                              | Argentina                                                  |
| LICON LUNA, Rosa Maria     | Apidologist                                                                            | Honey Bee Watch                                                      | France                                                     |
| Lidborg, Linda             | PhD student                                                                            | Durham University                                                    | United Kingdom of Great Britain and Northern Ireland (the) |
| Liddle, David              | Ecology                                                                                | Charles Darwin University                                            | Australia                                                  |

|                                         |                                                       |                                                            |                                                            |
|-----------------------------------------|-------------------------------------------------------|------------------------------------------------------------|------------------------------------------------------------|
| Liddle, Andrew                          | Researcher                                            | Perimeter Institute for theoretical Physics                | Canada                                                     |
| Lidicker, Jr., William Z.               | Professor Emeritus, Department of Integrative Biology | University of California, Berkeley                         | United States of America (the)                             |
| Liébana, Raquel                         | PhD                                                   | Chalmers University of Technology                          | Sweden                                                     |
| Lieberman, Susan                        | Vice President, International Policy                  | Wildlife Conservation Society                              | United States of America (the)                             |
| Liede-Schumann, Sigrid                  | Full professor, Botany                                | University of Bayreuth                                     | Germany                                                    |
| Liedtke, Hans Christoph                 | Postdoctoral Researcher                               | Biological Station Doñana                                  | Spain                                                      |
| Liefwalker, Daniel                      | Research Assistant Professor                          | Oregon Health and Science University                       | United States of America (the)                             |
| LIEGEOIS, Maud                          | Agronomist / PhD student in Ecology and Evolution     | University of Lausanne                                     | Switzerland                                                |
| Liehr, Thomas                           | Biology and Genetics                                  | Institute of Human Genetics Jena                           | Germany                                                    |
| Liesaputra, Veronica                    | Lecturer in Computer Science                          | University of Otago                                        | New Zealand                                                |
| Liesenfeld, Marcus Vinicius Athaydes    | Professor                                             | Universidade Federal do Acre                               | Brazil                                                     |
| Liesenfeld, Marcus Vinicius de Athaydes | Professor                                             | Universidade Federal do Acre                               | Brazil                                                     |
| Lieskovský, Juraj                       | Landscape Ecology                                     | Institute of Landscape Ecology, Slovak Academy of Sciences | Slovakia                                                   |
| Light, Ann                              | Cultural Transformation to address climate change     | University of Sussex/Malmo University                      | United Kingdom of Great Britain and Northern Ireland (the) |
| Ligmann-Zielinska, Arika                | Associate Professor, Geography                        | Michigan State University                                  | United States of America (the)                             |
| Likens, Gene E.                         | Founding Director and President Emeritus              | Cary Institute of Ecosystem Studies                        | United States of America (the)                             |
| Lilensten, Jean                         | Research director                                     | CNRS - IPAG                                                | France                                                     |
| Liles, Michael                          | Conservation Scientist                                | Asociación ProCosta                                        | El Salvador                                                |
| Liliane, Meignen                        | Directrice recherches émérite                         | CNRS                                                       | France                                                     |
| Liljebjelke, Karen                      | Assistant Professor                                   | University of Calgary                                      | Canada                                                     |
| Lill, Ross                              | Plant scientist                                       | NZ Institute of Plant and Food Research                    | New Zealand                                                |
| Lillethorup, Thea                       | Postdoc, Department of Clinical Medicine              | Aarhus University                                          | Denmark                                                    |
| Lillo Box, Jorge                        | ESO Fellowship                                        | European Southern Observatory (ESO)                        | Spain                                                      |
| Lilly, Jonathan                         | Physical Oceanographer                                | Theiss Research                                            | United States of America (the)                             |
| Lillywhite, Harvey                      | Professor of Biology                                  | University of Florida                                      | United States of America (the)                             |
| Lily Arison, Rene de Roland             | Biologiste                                            | The Peregrine Fund                                         | Madagascar                                                 |
| Lim, Jun Ying                           | Postdoctoral Researcher                               | University of Amsterdam                                    | Netherlands (the)                                          |
| Lim, Francis                            | Senior and Lead Scientist for Discovery               | Entopsis                                                   | United States of America (the)                             |
| Lim, Joeline                            | M.Sc Biology                                          | Queen's University                                         | Canada                                                     |
| Lima, Elson                             | Project Manager                                       | Casa da Floresta                                           | Brazil                                                     |
| Lima, Ana Luiza                         | Biology student                                       | Rio de Janeiro's Federal University (UFRJ)                 | Brazil                                                     |
| Lima, Jacqueline                        | Post doctoral / molecular ecology                     | UFRGS                                                      | Brazil                                                     |
| Lima, Alice                             | PhD in Biology                                        |                                                            | France                                                     |
| Lima, Fernando P.                       | Researcher                                            | CIBIO/InBIO, University of Porto                           | Portugal                                                   |
| Limbach, Friederich                     | PhD. Physics                                          |                                                            | United States of America (the)                             |
| Limburg, Karin                          | Professor, Fisheries and Ecosystem Sciences           | SUNY College of Environmental Science and Forestry         | United States of America (the)                             |
| Limier, Frantz                          | Botanist (PhD)                                        |                                                            | France                                                     |

|                              |                                                          |                                                |                                                            |
|------------------------------|----------------------------------------------------------|------------------------------------------------|------------------------------------------------------------|
| Limón-Morales, Ofelia        | Dr.                                                      | Universidad Autónoma Metropolitana             | Mexico                                                     |
| Lin, Mu-Xing                 | Predoc Fellow of Tech Laws                               | RSPRC, National Taiwan University              | Taiwan                                                     |
| Linard, Morgane              | MD in public health, PhD student in epidemiology         | INSERM Bordeaux                                | France                                                     |
| Linares, Cristina            | Associate professor                                      | University of Barcelona                        | Spain                                                      |
| Linares-Palomino, Reynaldo   | Ecologist                                                | Smithsonian Conservation Biology Institute     | Peru                                                       |
| Linblad, Inger               | Senior lecturer in social work                           | Sodertorns University                          | Sweden                                                     |
| Lincoln, Johnny              | CEO                                                      | Axiom Materials, Inc                           | United States of America (the)                             |
| Lincoln, James               | Professor of Physics                                     | AAPT                                           | United States of America (the)                             |
| Lind, Johan                  | Associate professor                                      | Stockholm University                           | Sweden                                                     |
| Lind, Ole Christian          | CERAD CoE Research Director, Environmental Radioactivity | Norwegian University of Life Sciences          | Norway                                                     |
| Linde, Niklas                | Professor of Environmental Geophysics                    | University of Lausanne                         | Switzerland                                                |
| Lindén, Leena                | University Lecturer                                      | University of Helsinki                         | Finland                                                    |
| Lindenbaum, Pierre           | Bioinformatics                                           | INSERM                                         | France                                                     |
| Lindenberg, Katrin           | molecular biologist, neurologist                         | Ulm University                                 | Germany                                                    |
| Linder, Hans Peter           | Professor                                                | University of Zurich                           | Switzerland                                                |
| Linder, Ed                   | Registered Professional Geologist                        | University of Memphis                          | United States of America (the)                             |
| Lindeza, Ana                 | PhD student                                              | Institute for Evolution and Biodiversity       | Germany                                                    |
| Lindig, Sascha               | Post Doc in PV system performannce and reliability       | EURAC Research                                 | Italy                                                      |
| Lindner, Andre               | Biologist/Ecologist, postgraduate course coordinator     | TU Dresden, CIPSEM                             | Germany                                                    |
| Lindner, Claudia             | Doctoral student in Geography                            | Ruhr-University Bochum                         | Germany                                                    |
| Lindroth, Richard            | Vilas & Sorenson Distinguished Achievement Professor     | University of Wisconsin-Madison                | United States of America (the)                             |
| Lindsey, Kieran              | Wildlife Biology                                         | Virginia Tech                                  | United States of America (the)                             |
| Lindsjö, Johan               | DVM, lecturer/PhD-student                                | Swedish University of Agricultural Sciences    | Sweden                                                     |
| Lindström, Kristina          | Professor                                                | University of Helsinki                         | Finland                                                    |
| Lindstrom Friggens, Nina     | Plant-Soil Ecologist, PhD                                | University of Stirling                         | United Kingdom of Great Britain and Northern Ireland (the) |
| Ling, W                      | Research Scientist                                       | Institut de Biologie Structurale               | France                                                     |
| Ling, Rich                   | Professor (retired)                                      | Norwegian Academy of Science                   | Norway                                                     |
| Ling, Wai Li                 | Scientist                                                | Institut de Biologie Structurale               | France                                                     |
| Ling, Robert                 | Professor of Biology                                     | Kankakee Community College                     | United States of America (the)                             |
| Lingaraju, Mahesh            | PhD student                                              | Max-Planck Institute                           | Germany                                                    |
| Linge, Stefan                | Nordic Master in Cold Climate Engineering                | DTU Space                                      | Denmark                                                    |
| Lingnau, Rodrigo             | Professor                                                |                                                | Brazil                                                     |
| Lingua, Emanuele             | Associate Professor in forest ecology and management     | University of Padova                           | Italy                                                      |
| Linhares Dantas, Maria Luiza | PhD Candidate Astrophysics                               | Universidade de São Paulo                      | Brazil                                                     |
| Link, Andrés                 | Associate Professor in Biology                           | Universidad de Los Andes                       | Colombia                                                   |
| Link, Roman Mathias          | Research Fellow                                          | Institute of Botany II, University of Würzburg | Germany                                                    |
| Link, Steffen                | PostDoc, Electrochemistry                                | Coburg University of Applied Sciences and Arts | Germany                                                    |
| Linke, Natalie               | Project Manager                                          | Monash University                              | Australia                                                  |

|                           |                                                             |                                                                                                                            |                                                            |
|---------------------------|-------------------------------------------------------------|----------------------------------------------------------------------------------------------------------------------------|------------------------------------------------------------|
| Linkhorst, Annika         |                                                             | Uppsala University                                                                                                         | Sweden                                                     |
| Linnanen, Lassi           | Professor, Sustainability Science                           | Lappeenranta-Lahti University of Technology                                                                                | Finland                                                    |
| Lino, Sofia               | PhD student                                                 | Faculty of Sciences University of Lisbon                                                                                   | Portugal                                                   |
| Lins, Lidia               | Postdoctoral researcher                                     | Ghent University                                                                                                           | Belgium                                                    |
| Lintermans, Mark          | Principal Research Fellow, Centre for Applied Water Science | Institute for Applied Ecology, University of Canberra                                                                      | Australia                                                  |
| LINTON, MARIA ANGELICA    | Professor - Phycology                                       | Universidade Federal de Santa Maria                                                                                        | Brazil                                                     |
| Lintulaakso, Kari         | Collection Coordinator                                      | Finnish Natural History Museum (FNHM)                                                                                      | Finland                                                    |
| Lintzel, Esther-Marie     | Finished Master student, Biology (soil and fauna ecology)   | Institut für integrative Biodiversitätsforschung - iDIV                                                                    | Germany                                                    |
| Lipp, Vladimir            | Postdoc                                                     | Institute of Nuclear Physics, Polish Academy of Sciences                                                                   | Poland                                                     |
| Lippmann, Tanya           | PhD Candidate                                               | Vrije Universiteit Amsterdam                                                                                               | Netherlands (the)                                          |
| Lipsewers, Tobias         | PhD student                                                 | Finnish Environment Institute                                                                                              | Finland                                                    |
| Lisboa, Carolina          | Biologist                                                   | Universidade Federal do Rio Grande do Norte                                                                                | Brazil                                                     |
| Lissau, Jonas Sandby      | Postdoc, Chemical Physics, Solar Energy                     | University of Southern Denmark                                                                                             | Denmark                                                    |
| Lister, Adrian            | Professor and Research Leader                               | Natural History Museum                                                                                                     | United Kingdom of Great Britain and Northern Ireland (the) |
| Lisztes-Szabó, Zsuzsa     | Researcher                                                  | Isotope Climatology and Environmental Research Centre (ICER) Institute for Nuclear Research, Hungarian Academy of Sciences | Hungary                                                    |
| Litchfield, Carla         | Head of Discipline: Psychology                              | University of South Australia                                                                                              | Australia                                                  |
| Literáková, Petra         |                                                             | Global Change Research Institute Czech Academy of Science                                                                  | Czech Republic (the)                                       |
| Little, Mary              | Lecturer - Environmental Ethics and Human Rights            | School for Field Studies                                                                                                   | Costa Rica                                                 |
| Little, James             | Professor Emeritus                                          | University of Washington                                                                                                   | United States of America (the)                             |
| Litton, Creighton         | Professor                                                   | University of Hawaii at Manoa                                                                                              | United States of America (the)                             |
| Litus, Greg               | Horticulture                                                | Colorado State University                                                                                                  | United States of America (the)                             |
| Litza, Kathrin            |                                                             | Institute of Ecology, University Bremen                                                                                    | Germany                                                    |
| Liu, Dibo                 | Postdoc                                                     | Leibniz-Institute of Freshwater Ecology and Inland Fisheries                                                               | Germany                                                    |
| Livingston, Jack          | Associate Professor                                         | Slippery Rock University                                                                                                   | United States of America (the)                             |
| Livore, Juan              | Marine Ecology Researcher                                   | IBIOMAR-CONICET                                                                                                            | Argentina                                                  |
| Liz, André Vicente        | PhD candidate                                               | CIBIO/InBIO                                                                                                                | Portugal                                                   |
| Lizana, Miguel            | professor of Zoology                                        | Universidad de Salamanca                                                                                                   | Spain                                                      |
| Lizarraga-Celaya, Carlos  | Professor Physics                                           | Universidad de Sonora                                                                                                      | Mexico                                                     |
| Lizotte, Martine          | Oceanographer                                               | Université Laval                                                                                                           | Canada                                                     |
| Ljung, Karl               | Lecturer in geology                                         | Department of geology, Lund University                                                                                     | Sweden                                                     |
| Ljunggren Söderman, Maria | Associate professor                                         | Environmental Systems Analysis, Chalmers University of Technology                                                          | Sweden                                                     |
| Llanos-Garrido, Alejandro | Postdoctoral                                                | Complutense University of Madrid                                                                                           | Spain                                                      |
| Llewellyn, Anne           | Environmental research                                      | Retired                                                                                                                    | United States of America (the)                             |

|                           |                                                                                                |                                                              |                                                            |
|---------------------------|------------------------------------------------------------------------------------------------|--------------------------------------------------------------|------------------------------------------------------------|
| Llewellyn-Zaidi, Aimee    | Genetics and Metabolomics                                                                      |                                                              | United States of America (the)                             |
| Llirós, Marc              | Postdoctoral Researcher                                                                        | Girona Biomedical Research Institute                         | Spain                                                      |
| Llopis, Jorge C.          | PhD candidate                                                                                  | University of Bern                                           | Switzerland                                                |
| Llorens, Laura            | Associate Professor, Department of Environmental Sciences                                      | University of Girona                                         | Spain                                                      |
| Llorens, Pilar            | Researcher, Hydrology                                                                          | IDAEA-CSIC                                                   | Spain                                                      |
| Llorente, Miquel          | Director                                                                                       | Institut de Recerca i Estudis en Primatologia, IPRIM         | Spain                                                      |
| Llorente Rodríguez, Laura | Assistant Professor                                                                            | Universiteit Leiden                                          | Netherlands (the)                                          |
| Llort, Joan               | Researcher in Marine Biogeochemistry                                                           | Barcelona Supercomputing Centre                              | Spain                                                      |
| Llosa, Matxalen           | Professor                                                                                      | University of Cantabria                                      | Spain                                                      |
| LLOVEL, William           | Researcher                                                                                     | CNRS                                                         | France                                                     |
| Lloyd, Thomas             | Conservation Scientist                                                                         |                                                              | Australia                                                  |
| Lloyd, John               | Associate Director of Research                                                                 | American Wind Wildlife Institute                             | United States of America (the)                             |
| Lo, Min-Hui               | Associate Professor                                                                            |                                                              | Taiwan                                                     |
| Lo, Kim                   | Senior Research Associate                                                                      |                                                              | New Zealand                                                |
| Loader, María Cristina    | Infectious Diseases Specialist Registrar                                                       | Imperial College London                                      | United Kingdom of Great Britain and Northern Ireland (the) |
| Loaiza del Pozo, Kathia   | M.D.                                                                                           |                                                              | Australia                                                  |
| Lobão, Adriana            | Botanist/systematic of Angiosperms, Biogeography                                               | Universidade Federal Fluminense                              | Brazil                                                     |
| Lobo, Catarina            | Professor Auxiliar/Researcher Physics and Astronomy                                            | Universidade do Porto                                        | Portugal                                                   |
| Lobo, Jorge               | Research Professor                                                                             | CSIC                                                         | Spain                                                      |
| Loboda, Sarah             | Entomology                                                                                     | Université McGill                                            | Canada                                                     |
| Lobry, Olivier            | Research Engineer in Computer Science                                                          | CNRS                                                         | France                                                     |
| Locatelli, Bruno          | Scientist                                                                                      | CIRAD, University of Montpellier (France), CIFOR (Peru)      | Peru                                                       |
| Lochon, Iris              | PhD, Agroecology                                                                               |                                                              | France                                                     |
| Lockley, Catherine        | Nutrition Scientist                                                                            | Charles Sturt University                                     | Australia                                                  |
| Loconto, Paul             | Consultant in Analytical Chemistry and in Chemical Education                                   | none                                                         | United States of America (the)                             |
| Lodynsky, Lydia           | Health & Wellness                                                                              | Yale University                                              | United States of America (the)                             |
| Loeffler, Ivonne          | PostDoc, Lab head Nephrology                                                                   | University Hospital Jena, Friedrich-Schiller-University Jena | Germany                                                    |
| Loening, Ulrich           | Molecular biology and human ecology                                                            | retired from Universtiy of Edinburgh                         | United Kingdom of Great Britain and Northern Ireland (the) |
| Loew, Thomas              | Director / Corporate Sustainability Management, Governance. Management of Climate Related Risk | Institute for Sustainability                                 | Germany                                                    |
| Loewen, Ann               | Medical doctor and population health graduate student                                          | University of Manitoba                                       | Canada                                                     |
| Löf, Annette              | Researcher in Environmental communication                                                      | Swedish University of Agricultural Science                   | Sweden                                                     |
| Löffler, Christin         | Scientist                                                                                      | Rostock University Medical Center                            | Germany                                                    |
| Löffler, Peter            | Head of test, comissioning & QS / Physics                                                      | ELAC Sonar GmbH                                              | Germany                                                    |
| Löffler, Berndt           | Dr. med. Dipl.Psych., Cardiologist                                                             |                                                              | Germany                                                    |



|                         |                                                          |                                                              |                                                            |
|-------------------------|----------------------------------------------------------|--------------------------------------------------------------|------------------------------------------------------------|
| Logan, Stuart           | Scientific Sales Specialist                              |                                                              | United Kingdom of Great Britain and Northern Ireland (the) |
| Logan, Mitchel          | Biocontrol for Hawaii Department of Agriculture          | HDOA                                                         | United States of America (the)                             |
| Logiudice, Frank        | Senior instructor                                        | University of Central Florida                                | United States of America (the)                             |
| LoGiudice, Kathleen     | Professor of Biology                                     | Union Collete                                                | United States of America (the)                             |
| Logrono, Washington     | PhD student                                              | UFZ                                                          | Germany                                                    |
| Loh, Alan               | Astrophysics                                             | Paris Observatory                                            | France                                                     |
| Loh, Jonathan           | Honorary Research Fellow                                 | University of Kent                                           | United Kingdom of Great Britain and Northern Ireland (the) |
| Lohbeck, Madelon        | scientist functional ecology and land restoration        | World Agroforestry                                           | Kenya                                                      |
| Lohmann, Sophie         | Research Scientist                                       | Max Planck Institute for Demographic Research                | Germany                                                    |
| Lohmus, Asko            | Research Professor and Chair of Natural Resources        | University of Tartu                                          | Estonia                                                    |
| Lõhmus, Piret           | senior researcher on conservation biology                | Institute of Ecology and Earth Sciences, University of Tartu | Estonia                                                    |
| Lohse, Tim              | Sustainability Consultant                                | GreenDelta                                                   | Germany                                                    |
| Loik, Michael           | Professor                                                | University of California, Santa Cruz                         | United States of America (the)                             |
| Loiseau, Vincent        | PhD student in Biology                                   | CNRS                                                         | France                                                     |
| Lojewski, Christian     | Doctor                                                   | Charité                                                      | Germany                                                    |
| Loke, Vivienne          | Environmental science                                    |                                                              | Malaysia                                                   |
| Lomaeva, Maria          | Young Graduate Trainee                                   | European Space Agency                                        | Netherlands (the)                                          |
| Lombaert, Eric          | Research engineer in Evolutionary Biology                | INRA                                                         | France                                                     |
| Lombal, Anicee          | PhD Candidate                                            | University of Tasmania                                       | Australia                                                  |
| Lombardero, María       | Associate Professor                                      | Universidad de Santiago de Compostela                        | Spain                                                      |
| Lombardi, Celia         | Psychology                                               | privat                                                       | Argentina                                                  |
| Lombroso, Luca          | Meteorologist AMPRO                                      | Geophysical Observatory, DIEF UNIMORE                        | Italy                                                      |
| Lona Durazo, Frida      | PhD candidate                                            | University of Toronto                                        | Canada                                                     |
| Lôndero, Vinícius       | Geology                                                  | UNISINOS                                                     | Brazil                                                     |
| London, Annamaria       | Pharmacist                                               | University of Szeged                                         | Hungary                                                    |
| Long, Kelsie            | Postdoctoral researcher                                  | Australian National University                               | Australia                                                  |
| Long, Channen           | PhD candidate in Ecophysiology                           | University of Pretoria                                       | South Africa                                               |
| Long, Andrew            | Associate Professor of Mathematics and Statistics        | Northern Kentucky University                                 | United States of America (the)                             |
| Longaretti, Pierre-Yves | CNRS researcher — Sustainability Science                 | Université Grenoble Alpes / CNRS / INRIA                     | France                                                     |
| Longmore, Steven        | Professor of Astrophysics                                | Liverpool John Moores University                             | United Kingdom of Great Britain and Northern Ireland (the) |
| Longo, Michael          | Professor emeritus, Physics                              | University of Michigan                                       | United States of America (the)                             |
| Longo, Giuseppe         | Professor/Director of Research Emeritus                  | CNRS - Ecole Normale Supérieure, Paris                       | France                                                     |
| Longuetaud, Fleur       | Researcher on forest growth and wood quality             | INRA                                                         | France                                                     |
| Lonni, Valentin         | Chargé de mission DCSMM                                  | Museum National d'Histoire Naturelle                         | France                                                     |
| Lonsdale, Carol         | Emeritus Scientist, Astrophysics                         | National Radio Astronomy Observatory                         | United States of America (the)                             |
| Loonen, Maarten         | Associate Professor Arctic Ecology                       | University of Groningen, Arctic Centre                       | Netherlands (the)                                          |
| Loos, Sarah             | Postdoctoral Researcher in Physics (Statistical Physics) | ICTP                                                         | Italy                                                      |

|                                 |                                                                 |                                                                                                           |                                |
|---------------------------------|-----------------------------------------------------------------|-----------------------------------------------------------------------------------------------------------|--------------------------------|
| Loot, Céline                    |                                                                 | Institut Pasteur, CR CN, CNRS                                                                             | France                         |
| Lopera-Toro, Alejandro          | Resercher                                                       | Asociación GAICA                                                                                          | Colombia                       |
| lopes, ileyne                   | Ecologist                                                       | Universidade Federal do Ceará - UFC                                                                       | Brazil                         |
| Lopes, Myriam                   | Assitant Professor                                              | CESAM & University of Aveiro                                                                              | Portugal                       |
| Lopes, Luís                     | Engenheiro                                                      | Apief                                                                                                     | Portugal                       |
| Lopes, Cassiane                 | Master student                                                  | Universidade Federal do Pampa                                                                             | Brazil                         |
| Lopes, Priscila                 | Human Ecologist                                                 | Universidade Federal do Rio Grande do Norte                                                               | Brazil                         |
| Lopes, Aline                    | post doctoral in Ecology                                        | Universidade de Brasília                                                                                  | Brazil                         |
| Lopes, Gerson                   | Biologist/Conservation                                          | Instituto de Desenvolvimento Sustentável Mamirauá                                                         | Brazil                         |
| Lopes, Ariadna                  | Professor, Plant Ecology                                        | Universidade Federal de Pernambuco                                                                        | Brazil                         |
| Lopes, Luisa                    | Analista Ambiental                                              | Instituto Chico Mendes de Conservação da Biodiversidade - ICMBio                                          | Brazil                         |
| Lopez, Clément J.R.             | Earth Science                                                   | Experimental Station of Arid Zones - CSIC                                                                 | Spain                          |
| Lopez, Omr                      | Director of the National Research System / Biologist            | Secretaria Nacional de Ciencia Tecnología e Innovación                                                    | Panama                         |
| Lopez, Ariel                    | Herpetology researcher                                          | Instituto Nacional de Medicina Tropical                                                                   | Argentina                      |
| Lopez, Lawrence                 | Postdoctoral Associate in Biological Sciences                   | Florida International University                                                                          | United States of America (the) |
| Lopez, Omar                     | Plant Biologist                                                 | SENACYT                                                                                                   | Panama                         |
| López, Mercedes G.              | Professor/Ph.D.                                                 | Cinvestav                                                                                                 | Mexico                         |
| López, Luis                     | Biologist                                                       | Asociación Vida Silvestre Amazónica                                                                       | Peru                           |
| López, Naiara                   | PhD Candidate                                                   | University of the Basque Country                                                                          | Spain                          |
| López, Daniel                   | Immunologist                                                    | Instituto de Salud "Carlos III"                                                                           | Spain                          |
| López Alvarado, Silvia          | Teacher/researcher (sexology); PhD candidate                    | Universidad de Cuenca and KULeuven                                                                        | Ecuador                        |
| Lopez Barrera, Fabiola          | Full-Time Researcher / restoration ecology                      | Instituto de Ecología, A.C.                                                                               | Mexico                         |
| LOPEZ BAUCCELLS, ADRIA          | BIOLOGIST - CONSERVATIONIST                                     | NATURAL SCIENCES MUSEUM OF GRANOLLERS                                                                     | Spain                          |
| López Calderón, Cosme           | Pos-doc position                                                | University of Seville                                                                                     | Spain                          |
| López Munguía, Agustin          | Resercher                                                       | Instituto de Biotecnología, UNAM                                                                          | Mexico                         |
| López Portillo, Jorge           | Main researcher                                                 | Instituto de Ecología, A.C.                                                                               | Mexico                         |
| López Rodríguez, Manuel Jesús   | Associate Professor                                             | University of Granada                                                                                     | Spain                          |
| LOPEZ VALDES, NESTOR            | VULCANOLOGIST                                                   | UNAM                                                                                                      | Mexico                         |
| López- Lozano, Nguyen Esmeralda | Researcher in microbial ecology                                 | Instituto Potosino de Investigación Científica y Tecnológica (IPICYT)                                     | Mexico                         |
| López-Arbarello, Adriana        | Researcher / Palaeontology                                      | Department of Earth and Environmental Sciences, Palaeontology & Geobiology, Ludwig-Maximilians-University | Germany                        |
| López-Archilla, Ana Isabel      | Full Professor in Microbial Ecology                             | Universidad Autónoma de Madrid                                                                            | Spain                          |
| López-Bao, José Vicente         |                                                                 | Oviedo University                                                                                         | Spain                          |
| López-Barrera, Fabiola          | Researcher                                                      | Instituto de Ecología, A.C.                                                                               | Mexico                         |
| López-Bosch, David              | Biology and ecology                                             | Autonomous University of Barcelona                                                                        | Spain                          |
| Lopez-Bustins, Joan A.          | Associate Professor                                             | University of Barcelona                                                                                   | Spain                          |
| López-Corona, Oliver            | Cátedras CONACyT Researcher and asocieted researcher at C3-UNAM | CONACyT-CONABIO; C3, UNAM                                                                                 | Mexico                         |

|                                  |                                                       |                                                                                         |                                |
|----------------------------------|-------------------------------------------------------|-----------------------------------------------------------------------------------------|--------------------------------|
| López-Fernández, Hernán          | Associate Professor and Curator                       | University of Michigan                                                                  | United States of America (the) |
| Lopez-Garcia, Jose Maria         | Geologist                                             | Instituto Geologico y Minero de España (Geological Survey of Spain)                     | Spain                          |
| Lopez-Garcia, Purificacion       | Research Director                                     | CNRS                                                                                    | France                         |
| Lopez-Gomez, Carlos              | Postdoctoral/Biomedicine                              | IBIMA                                                                                   | Spain                          |
| Lopez-Gonzalez, Celia            | Professor /Systematics and Biogeography               | Instituto Politecnico Nacional                                                          | Mexico                         |
| Lopez-Jimenez, Nicolas           | Species Conservation Program Officer / Biology Doctor | SEO/BirdLife (Sociedad Española de Ornitología / BirdLife International)                | Spain                          |
| López-Jiménez, Nicolás           | Species Conservation Program Officer / Biology        | Sociedad Española de Ornitología / BirdLife International                               | Spain                          |
| Lopez-Mariscal, Manuel           | Research Scientist, Physical Oceanography             | CICESE                                                                                  | Mexico                         |
| Lopez-Marquez, Violeta           | PhD Student                                           | Museo Nacional de Ciencias Naturales                                                    | Spain                          |
| López-Martínez, Sergio           | PhD candidate in Biological Sciences                  | University of Almeria                                                                   | Spain                          |
| Lopez-Massaguer, Oriol           | PhD in Biomedicine. Computer Scientist                | Not affiliated                                                                          | Spain                          |
| Lopez-Mobilia, Rafael            | Physics                                               | The University of Texas at San Antonio                                                  | United States of America (the) |
| López-Núñez, Francisco Alejandro | PhD student                                           | Centre for Functional Ecology, University of Coimbra                                    | Portugal                       |
| López-Núñez, Franciso Alejandro  | Researcher                                            | Centre for Functional Ecology - University of Coimbra                                   | Portugal                       |
| López-Quiroga, Eva               | Biologist                                             | Universidad de Vigo                                                                     | Spain                          |
| López-Silva, Diana V.            | PhD student                                           | Centro de Investigación Científica y de Educación Superior de Ensenada, Baja California | Mexico                         |
| López-Victoria, Mateo            | Director of the Biology Program                       | Pontificia Universidad Javeriana Cali                                                   | Colombia                       |
| LOPEZ-WILCHIS, RICARDO           | Biological researcher                                 | Universidad Autónoma Metropolitana                                                      | Mexico                         |
| Lorda, Julio                     | Professor                                             | UABC                                                                                    | Mexico                         |
| Lorenz, Eva                      | Epidemiology and Biostatistics                        |                                                                                         | Germany                        |
| Lorenz, Julia                    | Biologist, research associate                         | Leibniz Institute for Zoo and Wildlife Research (IZW)                                   | Germany                        |
| Lorenz, Sabine                   | Agriculture/Pesticides Residues                       | Industry                                                                                | Germany                        |
| Lorenzo, Fabian                  | Researcher and assistant professor                    | University of La Laguna                                                                 | Spain                          |
| LORETTE, Guillaume               | Doctor in Hydrogeology                                | Causses du Quercy UNESCO Global Geoparc                                                 | France                         |
| Loretto, Matthias-Claudio        | Postdoctoral Researcher / Animal Behaviour            | Max Planck Institute of Animal Behavior                                                 | Germany                        |
| Lorimer, Graeme                  | Environmental Scientist                               | Biosphere Pty Ltd                                                                       | Australia                      |
| Lorrilliere, Romain              | Post-Doc                                              | CESCO - National Museum of Natural History, Paris                                       | France                         |
| Lorz, Tamara                     | Researcher in Sustainability Marketing                | Ludwig-Maximilians-Universität München                                                  | Germany                        |
| Losapio, Gianalberto             | Researcher, Ecology                                   |                                                                                         | Switzerland                    |
| Loschi, Matteo                   | PhD Student                                           | University of Trieste                                                                   | Italy                          |
| Losi, Zainuddin                  | Political Science                                     | Universitas Sulawesi Barat                                                              | Indonesia                      |
| Losier, Donald                   | BSc. Physics                                          | Retired                                                                                 | Canada                         |
| Lossen, Jan                      | Project manager, crystalline silicon solar cells      | International Solar Energy Research Center Konstanz e.V.                                | Germany                        |
| Lotufo, Tito                     | Associate Professor                                   | Oceanographic Institute, University of Sao Paulo                                        | Brazil                         |
| Lotzkat, Sebastian               | Biology                                               | Staatliches Museum für Naturkunde Stuttgart                                             | Germany                        |
| Louapre, Philippe                | Associate professor - Ecology                         | University of Burgundy                                                                  | France                         |
| Loubéry, Sylvain                 | Plant biologist                                       | University of Geneva                                                                    | Switzerland                    |

|                          |                                                                                                                                                                                                       |                                                                                           |                                                            |
|--------------------------|-------------------------------------------------------------------------------------------------------------------------------------------------------------------------------------------------------|-------------------------------------------------------------------------------------------|------------------------------------------------------------|
| Loubser, David           | Environmental Consultant in the field of Ecosystem Services and Climate Adaptation                                                                                                                    | Ecosystem Services Ltd                                                                    | New Zealand                                                |
| Louge, Thierry           | Ph.D, computer science                                                                                                                                                                                |                                                                                           | France                                                     |
| Louis, Marie             | Post-doctoral fellow                                                                                                                                                                                  | University of Copenhagen                                                                  | France                                                     |
| Louis, Fiona             | Postdoctoral Researcher in Tissue engineering                                                                                                                                                         | Osaka University                                                                          | Japan                                                      |
| Loukakos, Kyriakos       | Mechanical Engineer, M.Sc. Engineering-Economic Systems. Free-Lance business consultant, manager of Programmes to support the olive oil and table olives sector (Regulation EU 1308/2013, article 29) | Agricultural cooperatives' Union of Laconia S.A. and collaborating producer organizations | Greece                                                     |
| Loureiro, João           | Assistant Professor                                                                                                                                                                                   | Centre for Functional Ecology, Departament of Life Sciences, University of Coimbra        | Portugal                                                   |
| Lourenço, Rui            | Researcher - Animal Ecology                                                                                                                                                                           | University of Évora                                                                       | Portugal                                                   |
| Lourenço, Giselle        | PhD Ecology reaserch                                                                                                                                                                                  | Unicamp                                                                                   | Brazil                                                     |
| Lourenço, Carla R.       | Marine Biology, PhD                                                                                                                                                                                   |                                                                                           | Portugal                                                   |
| Lourenço, André          | PhD student                                                                                                                                                                                           | CIBIO                                                                                     | Portugal                                                   |
| Lourenço, Pedro          | Lecturer                                                                                                                                                                                              | Hanze University of Applied Sciences                                                      | Netherlands (the)                                          |
| Lourie, Sara             | Research Associate                                                                                                                                                                                    | Redpath Museum, McGill University                                                         | Canada                                                     |
| Louvrier, Julie          | PostDoc in Statistical Ecology                                                                                                                                                                        | leibniz IZW, Berlin                                                                       | Germany                                                    |
| Louw, Marike             | MSc Zoology                                                                                                                                                                                           | Stellenbosch University                                                                   | South Africa                                               |
| Louzon, Maxime           | Researcher doctoral                                                                                                                                                                                   | UMR CNRS 6249 Chrono-environnement, Université Franche-Comte                              | France                                                     |
| Lovari, Sandro           | Full professor of Animal Behaviour                                                                                                                                                                    | Maremma Natural History Museum                                                            | Italy                                                      |
| Loveday, Jane            | Post graduate student in landscape design for heat mitigation                                                                                                                                         | Curtin University                                                                         | Australia                                                  |
| Lovegrove-Walsh, Jessica | Research Assistant                                                                                                                                                                                    | University of Vienna                                                                      | Austria                                                    |
| Lovejoy, Thomas          | Univ Prof Environmental Science and Policy                                                                                                                                                            | George Mason University                                                                   | United States of America (the)                             |
| Loveless, Marilyn        | Professor of Biology Emerita                                                                                                                                                                          | The College of Wooster                                                                    | United States of America (the)                             |
| Loveridge, Robin         | PhD Researcher                                                                                                                                                                                        | University of York                                                                        | United Kingdom of Great Britain and Northern Ireland (the) |
| Lovett, Charles          | Professor of Chemistry                                                                                                                                                                                | Williams College                                                                          | United States of America (the)                             |
| Lovett, Jennifer         | Conservation Biologist/Author                                                                                                                                                                         |                                                                                           | United States of America (the)                             |
| Low, Matthew             | Associate Professor in Ecology                                                                                                                                                                        | Swedish University of Agricultural Sciences                                               | Sweden                                                     |
| Löw Beer, David          | Research Associate                                                                                                                                                                                    | IASS Potsdam                                                                              | Germany                                                    |
| Lowe, Rachael            | PhD Scholar                                                                                                                                                                                           | Fenner School of Environment & Society, Australian National University                    | Australia                                                  |
| Lowe, Ian                | Emeritus Professor                                                                                                                                                                                    | Griffith University                                                                       | Australia                                                  |
| Lowenthal, James         | Professor of Astronomy                                                                                                                                                                                | Smith College                                                                             | United States of America (the)                             |
| Lowman, Meg              | Director                                                                                                                                                                                              | Tree Foundation                                                                           | United States of America (the)                             |
| Lowney, Anthony          | Lecturer in Zoology                                                                                                                                                                                   | Animal and Agriculture Research Centre, Hartpury University, Gloucester, UK               | United Kingdom of Great Britain and Northern Ireland (the) |
| LOY, ANNA                | ASSOCIATE PROFESSOR IN ZOOLOGY                                                                                                                                                                        | UNIVERSITY OF MOLISE - DEPT. BIOSCIENCES AND TERRITORY                                    | Italy                                                      |
| Loyau, Adeline           | Researcher in Mountain ecology                                                                                                                                                                        | IGB                                                                                       | Germany                                                    |

|                           |                                                              |                                                                                                                                |                                  |
|---------------------------|--------------------------------------------------------------|--------------------------------------------------------------------------------------------------------------------------------|----------------------------------|
| lozano, clément           | Sorbonne Université                                          |                                                                                                                                | France                           |
| Lozano, Jorge             | Lecturer in Ecology                                          | Complutense University of Madrid                                                                                               | Spain                            |
| Lozano, Diego             | Research Scientist                                           | Neuroelectronics                                                                                                               | Spain                            |
| Lozano, Verónica Laura    | PhD.student in Limnology                                     | IEGEBA-CONICET, Argentina                                                                                                      | Argentina                        |
| Lozano Lazo, Denise       | PhD candidate in Sustainability Science                      | Univesity of Tokyo                                                                                                             | Bolivia (Plurinational State of) |
| Lu, Jingzhong             | PhD student, Animal Ecology                                  | University of Göttingen                                                                                                        | Germany                          |
| Lubitz, Timo              | Postdoctoral researcher in Theoretical Biophysics            | Humboldt University Berlin                                                                                                     | Germany                          |
| Luca, Massimiliano        | Ph.D. Student Computer Science                               | Free University of Bolzano                                                                                                     | Italy                            |
| Lucas, Yolanda            | PhStudent                                                    | Universidad Autónoma de Madrid                                                                                                 | Spain                            |
| Lucas, Matthew Q.         | Assistant Professor of Biology                               | Inter American University, Arecibo, Puerto Rico                                                                                | United States of America (the)   |
| Lucas Trujillo, Laura     | PhD candidate                                                | Unicamp                                                                                                                        | Brazil                           |
| Lucena-Perez, Maria       | PhD Student, Genomics and Conservation                       | Estacion Biologica de Doñana, EBD-CSIC                                                                                         | Spain                            |
| Lucifora, Luis O.         | Full-time Investigator, Aquatic ecology                      | Instituto Nacional de Limnología, Consejo Nacional de Investigaciones Científicas y Técnicas, Universidad Nacional del Litoral | Argentina                        |
| Lucius, Harald            | Dr.med. - MD, painspecialist                                 | Schmerztherapie auf der Geest                                                                                                  | Germany                          |
| Luck, Gary                | Adjunct Professor in Ecology and Interdisciplinary Science   | Charles Sturt University                                                                                                       | Australia                        |
| Lückgen, Janine           | Biotechnology                                                | Heidelberg University Hospital                                                                                                 | Germany                          |
| LUCOT, Eric               | Associate professor                                          | Université de Franche-Comté                                                                                                    | France                           |
| Ludlow, Francis           | Associate Professor of Medieval Environmental History        | Trinity College Dublin                                                                                                         | Ireland                          |
| Ludwig, Katrin            | Scientist Energy, Climate and Infrastructures                | IZT- Institute for Futures Studies and Technology Assessment                                                                   | Germany                          |
| Ludwig, Joachim           | Professor, educational sciences                              | University of Potsdam                                                                                                          | Germany                          |
| Luebke, Ana Katharina     | PhD student                                                  | Max-Planck-Institute for molecular genetics                                                                                    | Germany                          |
| Lueck, Michael            | Professor fo Tourism                                         | Auckland University of Technology                                                                                              | New Zealand                      |
| Luedeke, Jens             | Professor of Environmental Planning (Prof. Dr.)              | Beuth University of Applied Sciences (Berlin)                                                                                  | Germany                          |
| Luetge, Mechthild         | PhD student                                                  | University of Zuurich                                                                                                          | Switzerland                      |
| Luetz, Johannes           | Social Sciences; Interdisciplinarity                         | University of New South Wales (UNSW); Christian Heritage College (CHC)                                                         | Australia                        |
| Luger, Christianne        | Junior Researcher in Hydology                                | Deltares                                                                                                                       | Netherlands (the)                |
| Luhta, Tuija              | Geophysicist, Research Technician                            | University of Helsinki, Institute of Seismology                                                                                | Finland                          |
| Luis Calabuig, Estanislao | Rull                                                         | Catedrático de Ecología Universidad de León                                                                                    | Spain                            |
| Łukasik, Piotr            | Assistant Professor, Biology                                 | Jagiellonian University                                                                                                        | Poland                           |
| Lukaszewicz, Marcin       | Biotechnology                                                | Uniwersytet Wroclawski                                                                                                         | Poland                           |
| Luke, Hanabeth            | Lecturer in the School of Environment, Science & Engineering | Southern Cross University                                                                                                      | Australia                        |
| Luksenburg, Jolanda       | Postdoc, Environmental Biology                               | Leiden University                                                                                                              | Netherlands (the)                |
| Lula Costa, Ana Paula     | Phd student                                                  | Federal University of Parana                                                                                                   | Brazil                           |
| Luma, Sergio              | Professor of Zoology                                         | Universidade Federal do Rio Grande do Norte                                                                                    | Brazil                           |
| Luminet, Jean-Pierre      | Astrophysics                                                 | CNRS                                                                                                                           | France                           |

|                         |                                                                                                                                                                       |                                                                           |                                                               |
|-------------------------|-----------------------------------------------------------------------------------------------------------------------------------------------------------------------|---------------------------------------------------------------------------|---------------------------------------------------------------|
| Luna, Leilton Willians  | Ph.D. Student in Zoology                                                                                                                                              | Emílio Goeldi Museum                                                      | Brazil                                                        |
| Luna, Francisco         | Profesor                                                                                                                                                              | Universidad de Guanajuato                                                 | Mexico                                                        |
| Luna-Laurent, Emilie    | Research Assistant - Hydrology                                                                                                                                        |                                                                           | France                                                        |
| Lund-Ricard, Yasmine    | PhD student in Biology                                                                                                                                                | Sorbonne Université                                                       | France                                                        |
| Lundberg, Petter        | Ph.D. in Experimental Physics                                                                                                                                         | Department of Physics                                                     | Sweden                                                        |
| Lundgren, Magnus        | Geneticist                                                                                                                                                            | Uppsala University                                                        | Sweden                                                        |
| Luporini, Pierangelo    | emeritus zoology                                                                                                                                                      | University Camerino                                                       | Italy                                                         |
| Luque, Ángel            | Titular Professor (Zoology and Marine Biology),<br>Biology Department (retired); Researcher Centro<br>de Investigación en Biodiversidad y Cambio Global<br>(CIBC-UAM) | Universidad Autónoma de Madrid                                            | Spain                                                         |
| Lurie, Patrycja         | Neuron reconstruction specialist                                                                                                                                      | EPFL                                                                      | Switzerland                                                   |
| Luscombe, Christine     | Materials Science and Engineering                                                                                                                                     | University of Washington, Seattle                                         | United States of America (the)                                |
| Lush, Mike              | Ecologist                                                                                                                                                             |                                                                           | United Kingdom of Great Britain<br>and Northern Ireland (the) |
| Lusiana, Betha          | Ecological Modeller                                                                                                                                                   | World Agroforestry                                                        | Indonesia                                                     |
| Lute, Michelle          | Wildlife Conservation Scientist                                                                                                                                       | Texas State University                                                    | United States of America (the)                                |
| Luther, Katja           | Department of Biodiversity Informatics                                                                                                                                | Botanic Garden and Botanic Museum Berlin                                  | Germany                                                       |
| Luther, Andreas         | PostDoc                                                                                                                                                               | IUP Heidelberg                                                            | Germany                                                       |
| Lutz, Stefanie          |                                                                                                                                                                       | Helmholtz Centre for Environmental Research - UFZ                         | Germany                                                       |
| Lutz, Ilka              | Dr.                                                                                                                                                                   | Leibniz-Institute for Freshwater Ecology and Inland<br>Fisheries          | Germany                                                       |
| Lutz, Christopher       | Research Scientist in Nanoscience                                                                                                                                     | IBM Research                                                              | United States of America (the)                                |
| Luu, Hai                | Lecturer                                                                                                                                                              | Travinh University                                                        | Viet Nam                                                      |
| Luyckx, Marie           | phD student                                                                                                                                                           | Université Catholique de Louvain-la-Neuve (UCL)                           | Belgium                                                       |
| Luysaert, Sebastiaan    | Associate professor                                                                                                                                                   | VU Amsterdam                                                              | Netherlands (the)                                             |
| Luz, Lafayette          | Professor                                                                                                                                                             | Federal University of Bahia                                               | Brazil                                                        |
| LUZ, DIRCE FERREIRA LUZ | Biólogo                                                                                                                                                               | Universidade Federal de Mato Grosso do Sul                                | Brazil                                                        |
| Lydecker, Henry         | Researcher / Parasite Ecology                                                                                                                                         | University of Sydney                                                      | Australia                                                     |
| Lynch, Fiona            | Senior Research Officer                                                                                                                                               | Monash University                                                         | Australia                                                     |
| Lyndby, Niclas          | PhD student                                                                                                                                                           | EPFL                                                                      | Switzerland                                                   |
| Lynn, William           | Research Scientist                                                                                                                                                    | Marsh Institute, Clark University                                         | United States of America (the)                                |
| Lynn, Lorene            | Soil Scientist                                                                                                                                                        | Red Mountain Consulting LLC                                               | United States of America (the)                                |
| Lyon, Christopher       | Research Fellow                                                                                                                                                       | University of Leeds                                                       | United Kingdom of Great Britain<br>and Northern Ireland (the) |
| Lyons, Andrew           | Academic Coordinator                                                                                                                                                  | University of California Division of Agriculture and<br>Natural Resources | United States of America (the)                                |
| Lyons, Sarah            | Graduate student                                                                                                                                                      | University of British Columbia                                            | Canada                                                        |
| Lyytimäki, Jari         | Senior researcher                                                                                                                                                     | Finnish Environment Institute                                             | Finland                                                       |
| M Flores, Bernardo      | Postdoc                                                                                                                                                               | UNICAMP                                                                   | Brazil                                                        |
| Ma, Xiaoya              | Senior Research Fellow                                                                                                                                                | University of Exeter                                                      | United Kingdom of Great Britain<br>and Northern Ireland (the) |

|                                |                                                                                  |                                                                                                                              |                                                            |
|--------------------------------|----------------------------------------------------------------------------------|------------------------------------------------------------------------------------------------------------------------------|------------------------------------------------------------|
| Maan, Martine                  | Associate Professor in Evolutionary Biology                                      | University of Groningen                                                                                                      | Netherlands (the)                                          |
| Maas, Bea                      | PostDoc in Biology/Ecology                                                       | University of Vienna                                                                                                         | Austria                                                    |
| Maas, Barbara                  | Wildlife ecology                                                                 | People for Nature & Peace                                                                                                    | United Kingdom of Great Britain and Northern Ireland (the) |
| Mabile, Laurence               | Engineer                                                                         | Université Paul Sabatier Toulouse III, France                                                                                | France                                                     |
| Mabin, Christopher             | Marine ecology                                                                   | University of Tasmania                                                                                                       | Australia                                                  |
| Mabrouk, Ayman                 | Marine Ecologist                                                                 | CSS/NOAA                                                                                                                     | United States of America (the)                             |
| MacAlister, Dunja              | PhD student                                                                      | University of Cape Town                                                                                                      | South Africa                                               |
| Macaulay, Jamie                | Research Bioacoustics                                                            | University of St Andrews                                                                                                     | United Kingdom of Great Britain and Northern Ireland (the) |
| MacColl, Chris                 | PhD Candidate, Ecology                                                           | University of Queensland                                                                                                     | Australia                                                  |
| Macdonald, Ian A W             | International Environmental Consultant                                           | Private Consultancy                                                                                                          | South Africa                                               |
| MacDonald, Michael             | Graduate Student Ecology                                                         | Montana State University                                                                                                     | United States of America (the)                             |
| Macé, Matthias                 | Associate Researcher                                                             | Laboratoire d' Anthropobiologie Moléculaire et Imagerie de Synthèse, CNRS UMR 5288, Université Paul Sabatier, 31000 Toulouse | France                                                     |
| Macedo, Regina                 | Professor                                                                        | Universidade de Brasília                                                                                                     | Brazil                                                     |
| Machado, Liliane               | professor                                                                        | Universidade Federal da Paraíba                                                                                              | Brazil                                                     |
| Machado, Glauco                | Full Professor                                                                   | University of Sao Paulo                                                                                                      | Brazil                                                     |
| Machado, Patrícia              |                                                                                  | Unicamp - SP                                                                                                                 | Brazil                                                     |
| Machado, Marlon Magno Monteiro | Master's in Development Practice / Master's in Science Education and PhD Student | Universidade Federal Rural do Rio de Janeiro / Universidade Federal do Rio de Janeiro                                        | Brazil                                                     |
| Machado, Ana Paula             | PhD candidate - population genetics                                              | Department of Ecology and Evolution, University of Lausanne                                                                  | Switzerland                                                |
| Machado, Raquel                | postdoctoral researcher                                                          | Instituto Nacional de Pesquisas da Amazônia-INPA                                                                             | Brazil                                                     |
| Machado, Ricardo               | Associated Professor - Landscape Ecology                                         | University of Brasília                                                                                                       | Brazil                                                     |
| Machado, Pedro                 | Researcher - Planetary Atmospheres                                               | Institute of Astrophysics and Space Sciences                                                                                 | Portugal                                                   |
| MACHADO, LUIZ AUGUSTO          | Atmospheric Science                                                              | INPE                                                                                                                         | Brazil                                                     |
| Macheriotou, Lara              | PhD candidate                                                                    | Ghent University                                                                                                             | Belgium                                                    |
| Machín, Francisco              | Assistant Lecturer                                                               | Universidad de Las Palmas de Gran Canaria                                                                                    | Spain                                                      |
| Machingura, James              | Ecologist/Entomologist                                                           | Institute for Water Studies, University of the Western Cape                                                                  | South Africa                                               |
| Machon, Cristina               | Research associate                                                               | IBMB                                                                                                                         | Spain                                                      |
| Machon, Nathalie               | Professor of Ecology                                                             | Museum National d'Histoire Naturelle                                                                                         | France                                                     |
| Machordom, Annie               | Senior Researcher                                                                | Museo Nacional de Ciencias Naturales (MNCN-CSIC)                                                                             | Spain                                                      |
| Machura, Michael               | Ecologist                                                                        | The Morton Arboretum                                                                                                         | United States of America (the)                             |
| Macía, Manuel J.               | Associate Professor                                                              | Universidad Autónoma de Madrid                                                                                               | Spain                                                      |
| Macia-Vicente, Jose G.         | Postdoc/mycology                                                                 | Goethe University Frankfurt                                                                                                  | Germany                                                    |
| Macías, Nuria                  | Biologist                                                                        | University of Helsinki                                                                                                       | Finland                                                    |
| Macías Garcia, Constantino     | Full time researcher, Director                                                   | Instituto de Ecología, Universidad Nacional Autónoma de México                                                               | Mexico                                                     |
| Macieira, Raphael              | Professor                                                                        | Universidade Vila Velha                                                                                                      | Brazil                                                     |

|                            |                                                                                                                                                     |                                                                     |                                                            |
|----------------------------|-----------------------------------------------------------------------------------------------------------------------------------------------------|---------------------------------------------------------------------|------------------------------------------------------------|
| Maciel Lyra, Paulo Roberto | Full Professor / Mechanical Engineering                                                                                                             | Federal University of Pernambuco                                    | Brazil                                                     |
| Maciorowski, Anthony       | Deputy Director, Science Advisory Board, Retired                                                                                                    | US Environmental Protection Agency                                  | United States of America (the)                             |
| Mack, Erin                 | Postdoc                                                                                                                                             | University of Idaho                                                 | United States of America (the)                             |
| Mackallah, Chloe           | Climate Science                                                                                                                                     | CSIRO                                                               | Australia                                                  |
| Mackay, Eleanor            | Freshwater Ecologist                                                                                                                                |                                                                     | United Kingdom of Great Britain and Northern Ireland (the) |
| Mackelprang, Becky         | PhD, Plant Biology                                                                                                                                  |                                                                     | United States of America (the)                             |
| Mackenzie, Roy             | Assistant professor                                                                                                                                 | Universidad de Magallanes                                           | Chile                                                      |
| MacKenzie, James           | Professor and Chair of Biological Sciences                                                                                                          | SUNY Oswego                                                         | United States of America (the)                             |
| MacKenzie, James           | Director                                                                                                                                            | MacKenzie Ecological Services CC                                    | South Africa                                               |
| MacKichan, Joanna          | Senior Lecturer in Microbiology                                                                                                                     | Victoria University of Wellington                                   | New Zealand                                                |
| Mackie, Shona              | Research Fellow, Physics                                                                                                                            | Department of Physics, University of Otago                          | New Zealand                                                |
| MacKie, Doug               | Organisational Psychology                                                                                                                           | Centre for Climate Change Leadership in Organisations               | Australia                                                  |
| MacKinnon, Peter           | Today - Senior Research Associate Engineering & former Chief Glaciologist at the World Data Center for Glaciology, University of Colorado (Boulder) | University of Ottawa, Faculty of Engineering                        | Canada                                                     |
| MacLeod, Rebecca           | Research Scientist                                                                                                                                  | Illumina Inc.                                                       | United States of America (the)                             |
| Maclin, Edward             | Instructor, Anthropology                                                                                                                            | University of Memphis                                               | United States of America (the)                             |
| Macnaughtan, Jr., Donald   | PhD in Chemistry, retired                                                                                                                           | Bayer Corp.                                                         | United States of America (the)                             |
| MacNeill, Mia              | Ecology                                                                                                                                             | UC Davis                                                            | United States of America (the)                             |
| MacPherson, PhD, Malcolm   | Physics, retired                                                                                                                                    | retired                                                             | United States of America (the)                             |
| MacRae, Dan                | PhD Student, Marine Biology                                                                                                                         | University of Bristol                                               | United Kingdom of Great Britain and Northern Ireland (the) |
| Macreadie, Peter           | Associate Professor of Marine Science                                                                                                               | Deakin University - Blue Carbon Lab                                 | Australia                                                  |
| Madanes, Nora              | Ecologist                                                                                                                                           | FCEy N. UBA                                                         | Argentina                                                  |
| Madar, Daniel              | Environmental Science implementation in the government                                                                                              | SP Interface                                                        | Israel                                                     |
| MADDI, Franck A.           | Project manager - Botany                                                                                                                            | L'Herminier Natural History Society (SHNLH)                         | France                                                     |
| Madelaire, Carla           | Post doctoral researcher                                                                                                                            | University of Sao Paulo                                             | Brazil                                                     |
| Mader, Frederik            | General Medicine                                                                                                                                    | Gemeinschaftspraxis für Hausärztliche Versorgung                    | Germany                                                    |
| Madhusudhan, K V           | Assistant Professor                                                                                                                                 | Government College for Men, Cluster University, Kurnool AP          | India                                                      |
| Madin, Elizabeth           | Assistant Professor, Marine Ecology                                                                                                                 | Hawai'i Institute of Marine Biology, University of Hawai'i at Manoa | United States of America (the)                             |
| Madin, Laurence            | Senior Science Advisor                                                                                                                              | Woods Hole Oceanographic Institution                                | United States of America (the)                             |
| Madlener, Saskia           | Oceanography/Science Communicator                                                                                                                   | Oregon State University                                             | United States of America (the)                             |
| Madliger, Christine        | Post-doctoral Researcher; Conservation Physiology                                                                                                   | Carleton University                                                 | Canada                                                     |
| Madouasse, Aurélien        | Lecturer in veterinary epidemiology                                                                                                                 | Oniris - INRA                                                       | France                                                     |
| Madrigal, Javier           | Researcher                                                                                                                                          | INIA                                                                | Spain                                                      |
| Madritch, Mike             | Professor                                                                                                                                           | Appalachian State University                                        | United States of America (the)                             |
| Madsen, Kristine           | Associate Professor                                                                                                                                 | UC Berkeley                                                         | United States of America (the)                             |



|                            |                                                                                                                                                                                                                                    |                                                                            |                                                            |
|----------------------------|------------------------------------------------------------------------------------------------------------------------------------------------------------------------------------------------------------------------------------|----------------------------------------------------------------------------|------------------------------------------------------------|
| Mady, Rachael              | Graduate Student                                                                                                                                                                                                                   | Cornell University                                                         | United States of America (the)                             |
| Madysa, Nico               | PhD student in physics                                                                                                                                                                                                             | TU Dresden                                                                 | Germany                                                    |
| Maeda-Obregon, Alejandro   | Master's student in Biology                                                                                                                                                                                                        | University College London                                                  | United Kingdom of Great Britain and Northern Ireland (the) |
| Maehr, Tanja               | Postdoctoral Fellow in Wildlife Disease/Immunology/Zoology                                                                                                                                                                         | University of Surrey                                                       | United Kingdom of Great Britain and Northern Ireland (the) |
| Maeir, Aren                | Professor of Archaeology                                                                                                                                                                                                           | Bar-Ilan University                                                        | Israel                                                     |
| Maes, Tim                  | doctoral researcher                                                                                                                                                                                                                | KU Leuven                                                                  | Belgium                                                    |
| Maes, Alfons               | Professor Communication and Cognition                                                                                                                                                                                              | Tilburg University                                                         | Netherlands (the)                                          |
| Maestre, Fernando T.       | Distinguished Researcher, Ecology                                                                                                                                                                                                  | University of Alicante                                                     | Spain                                                      |
| Maffei, Fabio              | Post Doctoral researcher                                                                                                                                                                                                           | University of São Paulo State                                              | Brazil                                                     |
| Magalhães, Luísa           | Postdoctoral researcher in Biology and Ecology                                                                                                                                                                                     | University of Aveiro & CESAM                                               | Portugal                                                   |
| Magalhães, Célio           | Zoologist (Pesquisador Titular - retired)                                                                                                                                                                                          | Instituto Nacional de Pesquisas da Amazônia                                | Brazil                                                     |
| Magali, GERINO             | Professor                                                                                                                                                                                                                          | University Toulouse 3                                                      | France                                                     |
| Magallanes-Guijón, Gustavo | physicist and philosopher of science                                                                                                                                                                                               | UNAM                                                                       | Mexico                                                     |
| Magalli Henriques, Luiza   | Science and Technology Analyst                                                                                                                                                                                                     | INPA                                                                       | Brazil                                                     |
| Magalon, Helene            | Lecturer/ Marine Ecology                                                                                                                                                                                                           | Reunion Island University                                                  | Réunion                                                    |
| Magellan, Kit              | Research Professor                                                                                                                                                                                                                 | University of Battambang                                                   | Cambodia                                                   |
| Maggini, Ramona            | Researcher in spatial conservation planning under climate change                                                                                                                                                                   |                                                                            | Australia                                                  |
| Maggs, Christine Adair     | Honorary Professor, Biological Sciences                                                                                                                                                                                            | Queen's University Belfast                                                 | United Kingdom of Great Britain and Northern Ireland (the) |
| Magh, Ruth                 | PhD student                                                                                                                                                                                                                        | University of Freiburg                                                     | Germany                                                    |
| Maglio, Ivan Carlos        | Environment and Urban Planning                                                                                                                                                                                                     | IEA - USP. Global Cities Program                                           | Brazil                                                     |
| Magliozzo, Richard         | Executive Officer, PhD Program in Biochemistry                                                                                                                                                                                     | The Graduate Center CUNY                                                   | United States of America (the)                             |
| Magni, Carlo Alberto       | Associate Professor - Mathematics applied to economic decisions                                                                                                                                                                    | University of Modena and Reggio Emilia                                     | Italy                                                      |
| Magnúsdóttir, Edda         | Post doctoral fellow in marine biology                                                                                                                                                                                             | Department of Life and Environmental Sciences at the University of Iceland | Iceland                                                    |
| Magnússon, Eyjólfur        | Research Scientist                                                                                                                                                                                                                 | Institute of Earth Sciences, University of Iceland                         | Iceland                                                    |
| Magny, Michel              | Directeur de Recherche Classe Exceptionnelle Emérite                                                                                                                                                                               | CNRS, UMR 6249                                                             | France                                                     |
| Magrach, Ainhoa            | Ikerbasque Research Fellow                                                                                                                                                                                                         | Basque Centre for Climate Change, BC3                                      | Spain                                                      |
| Magro, Ana                 | Lecturer /Marine Botany                                                                                                                                                                                                            | University of Cádiz                                                        | Spain                                                      |
| Magu, David                | Lecturer                                                                                                                                                                                                                           | Dedan Kimathi University of technology                                     | Kenya                                                      |
| Mah, Thien-Fah             | Professor                                                                                                                                                                                                                          | University of Ottawa                                                       | Canada                                                     |
| Maharajh, Rasigan          | Political Economy                                                                                                                                                                                                                  | Institute for Economic Research on Innovation                              | South Africa                                               |
| Mahdavi, Ahmad             | Entomologist/ ecotoxicologist, ICT for agriculture and environment, Focal point for Mountain Partnership in the University of Tehran, CMS preventing poisoning group, RAMSAR, WWN, SWS/professor emeritus at University of Tehran. | University of Tehran/ and Sustainable agriculture and environment          | Iran (Islamic Republic of)                                 |
| Maher, Ray                 | Postdoctoral Research Fellow                                                                                                                                                                                                       | The University of Queensland                                               | Australia                                                  |

|                                          |                                                        |                                                                                          |                                                            |
|------------------------------------------|--------------------------------------------------------|------------------------------------------------------------------------------------------|------------------------------------------------------------|
| Mahlaba, Themba'lilahlwa                 | Associate Professor, Ecology                           | University of Eswatini                                                                   | Swaziland                                                  |
| Mahler, Bettina                          | Independent Researcher                                 | Conicet                                                                                  | Argentina                                                  |
| Mahmood, Mubasher                        | consultant for ozone repair                            | 21century edition a consulting media producer                                            | United States of America (the)                             |
| Mahmoodi, Mohammad                       | Assistant Professor, Plant Ecology                     | Research Institute of Forests and Rangelands of Iran                                     | Iran (Islamic Republic of)                                 |
| Mahoney, Cynthia                         | Clinical Assoc Professor of Medicine (retired)         | Retired. Stanford University School of Medicine                                          | United States of America (the)                             |
| Mahony, Michael                          | Professor                                              | School of Environmental and Life Sciences                                                | Australia                                                  |
| Mahran, Yossra                           | M.D.                                                   |                                                                                          | Germany                                                    |
| Mahsberg, Dieter                         | Zoology, Ecology                                       | Biocenter, University of Wuerzburg                                                       | Germany                                                    |
| Maia, Leonor                             | Professor                                              |                                                                                          | Brazil                                                     |
| Maia, Monique Rodrigues da Silva Andrade | Master                                                 | Inpa                                                                                     | Brazil                                                     |
| Maida, Carl                              | Professor Emeritus                                     | University of California, Los Angeles                                                    | United States of America (the)                             |
| Maier-Gutheil, Cornelia                  | Professor of Psychosocial Counseling                   | Protestant University of Applied Science Darmstadt                                       | Germany                                                    |
| Maignan, Fabienne                        | Researcher - Land surfaces                             | LSCE/IPSL                                                                                | France                                                     |
| Maillard, Antoine                        | Biochemistry researcher                                | Institut de Biologie Structurale                                                         | France                                                     |
| Maingon, Loys                            | Reasearch Director                                     | Strathcona Wilderness Institute                                                          | Canada                                                     |
| Mainguy, Gaell                           | Director of Development                                | Centre de Recherches Interdisciplinaires (CRI)                                           | France                                                     |
| Mainusch, Jakob                          | Forest Ecology                                         | Frontiers Media SA                                                                       | Switzerland                                                |
| Maiorano, Luigi                          | Assistant Professor                                    | University of Rome "La Sapienza"                                                         | Italy                                                      |
| Mair, Patrick                            | Senior Lecturer in Statistics                          | Harvard University                                                                       | United States of America (the)                             |
| maire, vincent                           | professor in plant-soil ecology                        | UQTR                                                                                     | Canada                                                     |
| Maires Hoppe, João Paulo                 | PhD Student                                            | UFES                                                                                     | Brazil                                                     |
| Maistrello, Lara                         | Associate Professor in General and Applied Entomology  | University od Modena and Reggio Emilia                                                   | Italy                                                      |
| Maitre, Sylvie                           | medical doctor (allergology-immunology specialization) | own office (en français: cabinet médical)                                                | Switzerland                                                |
| Maity, Arijit                            | Post-doctoral researcher                               | Institut de Biologie Structurale Grenoble                                                | France                                                     |
| MAJ, Stanislaw Paul                      | Academic                                               | Southern Cross University                                                                | Australia                                                  |
| Majcher, Małgorzata                      | Associate Professor                                    | UNIWERSYTET PRZYRODNICZY W POZNANIU                                                      | Poland                                                     |
| Majerova, Eva                            | Postdoctoral researcher in coral biology               | Hawai'i Institute of Marine Biology                                                      | United States of America (the)                             |
| Majewska, Roksana                        | Marine biologist                                       | North-West University                                                                    | South Africa                                               |
| Majolo, Bonaventura                      | Reader                                                 | University of Lincoln                                                                    | United Kingdom of Great Britain and Northern Ireland (the) |
| Major, Ian                               | Research Scientist in Forest Genomics                  | Laurentian Forestry Centre, Natural Resources Canada                                     | Canada                                                     |
| Makay Katz, Axel                         | Post-doctoral Researcher                               | Universidade Federal do Rio de Janeiro                                                   | Brazil                                                     |
| Makena, Maryanne                         | Biology of conservation                                | The University of Nairobi                                                                | Kenya                                                      |
| Makhalanyane, Thulani                    | Professor                                              | University of Pretoria                                                                   | South Africa                                               |
| Mäki, Mari                               |                                                        | Institute for Atmospheric and Earth System Research / Forest Sciences, Helsinki, Finland | Finland                                                    |
| Makkonen, Ulla                           | Senior Reseach Scientist                               | Finnish Meteorological Institute                                                         | Finland                                                    |
| Makus, Peter                             | PhD candidate in Solid Earth Geophysics                | Deutsches GeoForschungszentrum GFZ Potsdam                                               | Germany                                                    |

|                            |                                                 |                                                                         |                                                            |
|----------------------------|-------------------------------------------------|-------------------------------------------------------------------------|------------------------------------------------------------|
| MALABAD, Abdoulaye Mahamat | PhD Student Biology                             | Laboratoire Chrono-Environnement UMR 6249 CNRS UBFC                     | Chad                                                       |
| Malai, Doina               | Scientific Advisor                              | INSPQ                                                                   | Canada                                                     |
| Malay, Machel              |                                                 | University of the Philippines                                           | Philippines (the)                                          |
| Malbet, Fabien             | Directeur de Recherche CNRS in Astrophysics     | Université Grenoble Alpes / IPAG                                        | France                                                     |
| Maldonado, Ernesto         | Principal Investigator                          | National University of Mexico (UNAM)                                    | Mexico                                                     |
| Maldonado, Victoria        | Professor, Astronomy                            | Observatorio Astronómico de Córdoba, UNC                                | Argentina                                                  |
| Malej, Milan               | Independent environmental researcher and writer |                                                                         | Slovenia                                                   |
| Malej, Alenka              | marine biologist, retired                       | Marine Biology Station Piran, NIB                                       | Slovenia                                                   |
| Malek, Žiga                | Assistant Professor                             | Institute for Environmental Studies (IVM), Vrije Universiteit Amsterdam | Netherlands (the)                                          |
| Malfait, Nicole            | neuroscience researcher                         | CNRS                                                                    | France                                                     |
| Malgosa, Assumpció         | Full professor, Physical Anthropology           | Universitat Autònoma de Barcelona                                       | Spain                                                      |
| Malik, ABOUBACAR ABDOULAYE | Renewable energy and Energy efficiency Engineer | International Institute of Water and Environment Engineering            | Burkina Faso                                               |
| Malik, Faheem              | Associate lecturer                              | Northumbria University                                                  | United Kingdom of Great Britain and Northern Ireland (the) |
| Malinka, Chloe             | PhD Fellow in bioacoustics                      | Aarhus University                                                       | Denmark                                                    |
| Malinowska, Agata          | Proteomics                                      | IBB PAS                                                                 | Poland                                                     |
| Malinowski, Szymon         | professor, atmospheric physics                  | University of Warsaw                                                    | Poland                                                     |
| Máliš, František           | Assistant Professor                             | Technical University in Zvolen, Faculty of Forestry                     | Slovakia                                                   |
| Malizia, Agustina          | Ecóloga, Investigadora del CONICET              | Instituto de Ecología Regional (CONICET-UNT)                            | Argentina                                                  |
| Maljean-Dubois, Sandrine   | Researcher                                      | CNRS                                                                    | France                                                     |
| Mallach, Dennis            | Physicist                                       | WWU Muenster, Physical Insitute                                         | Germany                                                    |
| Mallefet, Jerome           | Research associate FNRS                         | Université catholique de Louvain, Marine biology Laboratory             | Belgium                                                    |
| Mallet, Christophe         | Functional Morphology PhD student               | Muséum National d'Histoire Naturelle, Paris                             | France                                                     |
| Mallozzi, Michael          | Research Associate                              | University of Arizona                                                   | United States of America (the)                             |
| Malo Larrea, Antonio       | Professor in Ecological Economics               | Universidad Católica de Cuenca                                          | Ecuador                                                    |
| Malone, James              | environmental economics and science             | University of ayork                                                     | United Kingdom of Great Britain and Northern Ireland (the) |
| Malone, Melanie            | Professor                                       |                                                                         | United States of America (the)                             |
| Malone, Timothy            | NHS Research Fellow                             | University of Exeter                                                    | United Kingdom of Great Britain and Northern Ireland (the) |
| Malone, Delia              | Ecologist                                       | Colorado Natural Heritage Program                                       | United States of America (the)                             |
| Malone, Elizabeth L        | Sociology                                       | Pacific Northwest National Laboratory                                   | United States of America (the)                             |
| Malta, Erik-jan            | Project manager / marine ecologist              | CTAQUA                                                                  | Spain                                                      |
| Maluche, Susanne           | PhD biology                                     | Medical University Munich                                               | Germany                                                    |
| Malvy, Denis JM            | Professor of Infectious diseases                | INSERM, University of Bordeaux                                          | France                                                     |
| Malzacher, Peter           | Physcs                                          | GSI                                                                     | Germany                                                    |
| Mamangkey, N. Gustaf F.    | Marine Biologist                                | Sam Ratulangi University                                                | Indonesia                                                  |
| Mamedova, Yuna             | Phd student                                     | Institute of Landscape Ecology SAS                                      | Slovakia                                                   |

|                      |                                                                                             |                                                           |                                                            |
|----------------------|---------------------------------------------------------------------------------------------|-----------------------------------------------------------|------------------------------------------------------------|
| Maminski, Mariusz    | professor, forestry                                                                         | Warsaw University of Life Sciences - SGGW                 | Poland                                                     |
| Mammola, Stefano     | PostDoc, Ecology and Subterranean Biology                                                   | University of Torino                                      | Italy                                                      |
| Mamouridis, Valeria  | Biologist                                                                                   | Unemployed                                                | Italy                                                      |
| Man, Jarrett         | Plant biologist                                                                             | University of Massachusetts Amherst                       | United States of America (the)                             |
| Mančal, Tomáš        | Assistant professor, Physics                                                                | Charles University                                        | Czech Republic (the)                                       |
| Mancheño, Jose M.    | Staff scientist. Molecular Biology                                                          |                                                           | Spain                                                      |
| Mancinelli, Riccardo | PhD                                                                                         | University of Leiden                                      | Netherlands (the)                                          |
| Mancini, Matheus     | Post doctoral student in Applied Ecology                                                    | Federal University of Lavras                              | Brazil                                                     |
| Mancuso, Jasmine     | Biology Aquatic Science Graduate Student                                                    | Grand Valley State University                             | United States of America (the)                             |
| Mancuso, Kristen     | PhD Candidate - Biology                                                                     | University of British Columbia Okanagan                   | Canada                                                     |
| Mandoki, Katya       | Professor of aesthetics, semiotics, theory of culture                                       | Universidad Autónoma Metropolitana                        | Mexico                                                     |
| Mandrioli, Mauro     | Associate Professor in genetics                                                             | Università di Modena e Reggio Emilia                      | Italy                                                      |
| Manelli, Luca        | PhD Student                                                                                 | University of Winchester                                  | United Kingdom of Great Britain and Northern Ireland (the) |
| Manenti, Raoul       | Zoologist                                                                                   | Università degli Studi di Milano                          | Italy                                                      |
| Maner, Jenny         | Research assistant                                                                          | Swiss Federal Institute of Aquatic Science and Technology | Switzerland                                                |
| Maneyro, Raúl        | Herpetologist                                                                               | Facultad de Ciencias. Universidad de la Republica         | Uruguay                                                    |
| Mangan, Mary         | Biology                                                                                     | OpenHelix                                                 | United States of America (the)                             |
| Mangena, Phetole     | Senior Lecturer, Department of Biodiversity (Botany)                                        | University of Limpopo                                     | South Africa                                               |
| Manghi, Manoel       | Physics                                                                                     | Toulouse University                                       | France                                                     |
| Mangilli, Anna       | Astrophysics                                                                                | IRAP                                                      | France                                                     |
| Manguette, Marie     | Biologist, PhD student                                                                      | Max Planck Institute for Evolutionary Anthropology        | Germany                                                    |
| Manhães, Adriana     | PhD in Ecology                                                                              | University of Rio Grande do Norte                         | Brazil                                                     |
| Manies, Kristen      | Ecologist                                                                                   |                                                           | United States of America (the)                             |
| Maniuk, Vadym        | associate professor, PhD in ecology                                                         | Oles Honchar Dnipro National University                   | Ukraine                                                    |
| Mankasingh, Utra     | Soils                                                                                       | University of Iceland                                     | Iceland                                                    |
| Mann, Judy           | Conservation Strategist                                                                     | SAAMBR                                                    | South Africa                                               |
| MANN, BRUCE QUINTIN  | Senior scientist                                                                            | South African Association for Marine Biological Research  | South Africa                                               |
| Mannheim, Karl       | Chair of Astronomy                                                                          | Universität Würzburg                                      | Germany                                                    |
| Manninen, Juha       | Prof. emer.                                                                                 | Dept of History                                           | Finland                                                    |
| Manning, I.P.A.      | Wildlife Biologist                                                                          |                                                           | Canada                                                     |
| Manning, Edward      | Geographer (past president of Canadian Association of Geographers, member the Club of Rome) | Tourisk Inc. , Sustainable Destinations , Ottawa Canada   | Canada                                                     |
| MANNING, Edward      | President Geographer Sustainable Development specialist                                     | TOURISK INC                                               | Canada                                                     |
| Mannocci, Laura      | postdoctoral researcher                                                                     | IRD                                                       | France                                                     |
| Manoharan, Adhavan   | Research student / Biotechnologist                                                          | Vellore Institute of technology                           | India                                                      |
| Manoj, Narayanan     | Associate Professor                                                                         | Indian Institute of Technology Madras                     | India                                                      |
| Manon, Latour        | Ecologist                                                                                   | National Museum of Natural History (Paris)                | France                                                     |

|                           |                                                               |                                                                                               |                                                            |
|---------------------------|---------------------------------------------------------------|-----------------------------------------------------------------------------------------------|------------------------------------------------------------|
| Mantilla-Meluk, Hugo      | Biology                                                       | Center for Highland Studies (Centro de Estudios de Alta Montaña CEAM) Universidad del Quindío | Colombia                                                   |
| Mäntylä, Elina            | Research scientist, ecology                                   | Biology Centre of the Czech Academy of Sciences                                               | Czech Republic (the)                                       |
| Manzanedo, Rubén          | Postdoctoral researcher. Forest ecology                       | Harvard University                                                                            | United States of America (the)                             |
| Manzanilla, Silvia        | Marine mammal ecology                                         | UNAM                                                                                          | Mexico                                                     |
| Manzano, Pablo            | Ecology                                                       | University of Helsinki                                                                        | Finland                                                    |
| Manzatto, Angelo Gilberto | PhD in ecology                                                | Federal University official Rondônia - Unir                                                   | Brazil                                                     |
| Manzi, Florent            | Doctoral student in Biology                                   | Leibniz-Institute of Freshwater Ecology and Inland Fisheries                                  | Germany                                                    |
| Maphalala, Machawe        | Ecologist                                                     | University of Eswatini                                                                        | Swaziland                                                  |
| Mappes, Johanna           | Academy professor                                             | University of Jyväskylä                                                                       | Finland                                                    |
| Mapurunga, Eduardo        | PhD student                                                   | Federal University of Rio Grande do Sul                                                       | Brazil                                                     |
| Maqbool, Massoud          | CEO & Chief AI Officer                                        | DeepWaters AI                                                                                 | United Kingdom of Great Britain and Northern Ireland (the) |
| Marabuto, Eduardo         | PhD student Evolutionary biology                              | Faculty of Sciences, University of Lisbon                                                     | Portugal                                                   |
| Marais, Gabriel           | CNRS Senior Investigator, Biology                             | Univ. Lyon 1                                                                                  | France                                                     |
| Maranhão, Louise          | Veterinária                                                   | Faculdade de Medicina Veterinária e Zootecnia/Universidade de São Paulo                       | Brazil                                                     |
| Marano, Gina              | PhD in Sustainable Forestry, University of Naples Federico II | Italy                                                                                         | Italy                                                      |
| Marañón, Teodoro          | Researcher on Forest Ecology                                  | IRNAS, CSIC                                                                                   | Spain                                                      |
| Marañón Jiménez, Sara     | Postdoctoral research associate                               | CREAF                                                                                         | Spain                                                      |
| Marasco, Valeria          | Post-doctoral fellow                                          | Mrs                                                                                           | Austria                                                    |
| Marc, MAYER               | Chargé de cours ULB (lecturer)                                | ULB                                                                                           | Belgium                                                    |
| Marçais, Benoit           | Forest pathology                                              | INRA                                                                                          | France                                                     |
| Marcati, Carmen           | Associate Professor                                           | UNESP                                                                                         | Brazil                                                     |
| Marcé, Rafael             | Research Scientist                                            | Catalan Institute for Water Research (ICRA)                                                   | Spain                                                      |
| Marcé-Nogué, Jordi        | Research Scientist                                            | University at Buffalo, the State University of New York                                       | United States of America (the)                             |
| Marcec-Greaves, Ruth      | National Amphibian Conservation Center-Director               | Detroit Zoological Society                                                                    | United States of America (the)                             |
| Marcel, Grégoire          | Astrophysicist                                                | Villanova University                                                                          | United States of America (the)                             |
| Marcelino, Joana          | PhD Candidate                                                 | University of Lisbon                                                                          | Portugal                                                   |
| Marcellini, Sylvain       | Professor                                                     | Universidad de Concepcion                                                                     | Chile                                                      |
| march, jaume              | Agragate professor                                            | Universitat de Lleida                                                                         | Spain                                                      |
| March, Rosaleen           | Landscape Ecologist                                           | Leiden University                                                                             | Netherlands (the)                                          |
| MARCHADIER, Elodie        | Assistant professor                                           | Université Paris Sud                                                                          | France                                                     |
| Marchand, Nicolas         | university lecturer                                           | LCE                                                                                           | France                                                     |
| Marchant, Robert          | Professor of Tropical Ecology                                 | University of York                                                                            | United Kingdom of Great Britain and Northern Ireland (the) |
| Marchante, Elizabete      | Researcher                                                    | Centre for Functional Ecology, University of Coimbra                                          | Portugal                                                   |
| Marchaudon, Aurélie       | Researcher                                                    | IRAP/CNRS                                                                                     | France                                                     |
| Marchel, James            | PhD Experimental Psychology                                   | UNIVERSITY OF UTAH (retired)                                                                  | United States of America (the)                             |
| Marchetta, Philine        | PhD student Neuroscience                                      | Molecular Physiology of Hearing, Tübingen                                                     | Germany                                                    |

|                              |                                                                                              |                                                                                             |                                |
|------------------------------|----------------------------------------------------------------------------------------------|---------------------------------------------------------------------------------------------|--------------------------------|
| Marchetti, Michael           | Fletcher Jones Professor of Ecology                                                          | St Marys College of California                                                              | United States of America (the) |
| Marchi, Maurizio             | Researcher On Fixed-Term Contract on <a href="http://b4est.eu/">http://b4est.eu/</a> project | CREA - Research Centre for Forestry and Wood                                                | Italy                          |
| Marchildon, Louis            | Emeritus Professor of Physics                                                                | Universite du Quebec (Trois-Rivieres)                                                       | Canada                         |
| Marchiol, Luca               | Associate Professor in Agronomy & Crop Science                                               | University of Udine                                                                         | Italy                          |
| Marchioni, Andrea            | PhD Candidate in Labour, Development, and Innovation                                         | University of Modena and Reggio Emilia                                                      | Italy                          |
| Marcinko, Kelsey             | PhD Candidate, Applied Mathematics (Mathematical Ecology)                                    | University of Washington                                                                    | United States of America (the) |
| Marcisz, Katarzyna           | Postdoc                                                                                      | Adam Mickiewicz University                                                                  | Poland                         |
| Marcolin, Fabio              | Research assistant                                                                           | MTA Centre for Ecological Research                                                          | Hungary                        |
| Marcon, Eric                 | Researcher                                                                                   | AgroParisTech, UMR EcoFoG                                                                   | France                         |
| Marcos, Magali               | Researcher                                                                                   | IPEEC, CONICET                                                                              | Argentina                      |
| Marcos-García, Maria Angeles | Professor of Zoology                                                                         | Research Institute CIBIO (Centro Iberoamericano de la Biodiversidad), Univertiy of Alicante | Spain                          |
| Marcoux, Julien              | Research Associate                                                                           | Centre National de Recherche Scientifique (CNRS)                                            | France                         |
| Marcq, Emmanuel              | Associate Professor, Planetary Science                                                       | LATMOS, Université Paris-Saclay                                                             | France                         |
| Maréchal, Alexandre          | Adjunct Professor of Biology                                                                 | Université de Sherbrooke                                                                    | Canada                         |
| Marengo, Jose                | Research An Development Directot                                                             | CEMADEN                                                                                     | Brazil                         |
| Mares, Constantin            | Senior scientist                                                                             | Institute of Geodynamics, Romanian Academy                                                  | Romania                        |
| Mares, Ileana                | Senior scientist                                                                             | Institute of Geodynamics, ile Romanian Academy                                              | Romania                        |
| Marescot, Lucile             | Postdoc conservation biology and biostatistics                                               | Center of Functional and Evolutionary Ecology CNRS Montpellier                              | France                         |
| Maresh, Jennifer             | Professor of Biology                                                                         | West Chester University                                                                     | United States of America (the) |
| Margalida, Antoni            | Senior scientist                                                                             | Institute for Game and Wildlife Research                                                    | Spain                          |
| Margaritis, Konstantinos     | Professor of Informatics                                                                     | University of Macedonia                                                                     | Greece                         |
| Margenstern, Maurice         | professor emeritus in computer science                                                       | Université de Lorraine                                                                      | France                         |
| Marggraf, Lara               | Biologist                                                                                    | Leibniz Institute for Zoo & Wildlife Research                                               | Germany                        |
| Marghetis, Tyler             | Cogntive Science                                                                             | Santa Fe Institute                                                                          | United States of America (the) |
| Margirier, Félix             | Oceanographer                                                                                | LOCEAN                                                                                      | France                         |
| Maria, Ana                   | physician (general practitioner)                                                             | Regional Health Administration of Lisbon and Tagus Valley                                   | Portugal                       |
| Maria, Ana Rita de           | physician                                                                                    | Regional Health Administration of Lisbon and Tagus Valley                                   | Portugal                       |
| Maria, Lisa                  | Ecologist/Environmental Scientist                                                            | Government                                                                                  | New Zealand                    |
| María Mar, Areco             | PhD Researcher CONICET and assistant profesor Universidad Nacional de San Martin. Biologist. | CONICET-UNSAM                                                                               | Argentina                      |
| Mariano, Vanessa             | PhD Candidate in Ecology and Natural Resources                                               |                                                                                             | Brazil                         |
| Mariano-Neto, Eduardo        | Full Professor - Ecology                                                                     | Federal University of Bahia                                                                 | Brazil                         |
| Marichal, Raphael            | Researcher                                                                                   | CIRAD                                                                                       | France                         |
| Marie, Amandine              | Research Fellow                                                                              | INR                                                                                         | France                         |
| Marie, Hrabanski             | researcher environmental policy                                                              | CIRAD                                                                                       | France                         |

|                               |                                                       |                                                                        |                                                            |
|-------------------------------|-------------------------------------------------------|------------------------------------------------------------------------|------------------------------------------------------------|
| Marie-Claire, Pierret         | Professor assistant                                   | Strasbourg University                                                  | France                                                     |
| Marie-Orleach, Lucas          | Postdoctoral researcher in Evolutionary Biology       | University of Oslo                                                     | Norway                                                     |
| marie-pascale, colace         | plant ecologist                                       | Laboratoire d'écologie alpine- UMR CNRS-UGA-USMB                       | France                                                     |
| Mariette, Stéphanie           | Scientist ecology&evolution                           | INRA                                                                   | France                                                     |
| Mariette, Mylene              | Behavioural Ecology                                   | Deakin University                                                      | Australia                                                  |
| Marin, Maxime                 | Post graduate student                                 | University of Tasmania                                                 | Australia                                                  |
| Marin da Fonte, Luis Fernando | Biologist / Conservationist                           | IUCN SSC Amphibian Specialist Group / Amphibian Survival Alliance      | Brazil                                                     |
| Marin Menendez, Alejandro     | Postdoc Genomics                                      | Wellcome Sanger Institute                                              | United Kingdom of Great Britain and Northern Ireland (the) |
| MARIN OJEDA, GRISELDA         | BOTANY PROFESSOR/MSC ON CONSERVATION BIOLOGY          | FACULTAD DE CIENCIAS EXACTAS Y NATURALES UNA                           | Paraguay                                                   |
| Marin-Beltran, Isabel         | Researcher (Biogeochemistry)                          | Centro de Ciências do Mar do Algarve                                   | Portugal                                                   |
| Marin-Guirao, Lazaro          | Researcher                                            | Spanish Institute of Oceanography                                      | Spain                                                      |
| Marina, Antongiovanni         | Environment Sub-Coordinator                           | Secretaria de Meio Ambiente e Recursos Hídricos do Rio Grande do Norte | Brazil                                                     |
| Marinach, Carine              | Research Engineer, microbiology                       | Sorbonne-Université                                                    | France                                                     |
| Marincola, Gabriella          | Microbiologist / PostDoc                              | University of Würzburg                                                 | Germany                                                    |
| Maringer, Franz Josef         | Professor Applied Physics                             | University of Natural Resources and Life Sciences Vienna               | Austria                                                    |
| Marinho-Filho, Jader          | Professor of Zoology                                  | Universidade de Brasília                                               | Brazil                                                     |
| Marini, Miguel Ângelo         | Zoology Professor                                     | Universidade de Brasília                                               | Brazil                                                     |
| Marino, Filippo               | PhD research student                                  | University of Exeter                                                   | United Kingdom of Great Britain and Northern Ireland (the) |
| Mariño, Mónica                | Marine Ecology                                        | Leibniz Centre for Tropical Marine Research                            | Germany                                                    |
| Marion, Jeffrey               | Research Biologist & Adjunct Professor, Virginia Tech | U.S. Geological Survey                                                 | United States of America (the)                             |
| Marjakangas, Emma-Liina       |                                                       | Norwegian University of Science and Technology                         | Norway                                                     |
| Mark Welch, David             | Senior Scientist                                      | Marine Biological Laboratory                                           | United States of America (the)                             |
| Mark, FRSNZ, Sir Alan         | Emeritus Professor                                    | University of Otago                                                    | New Zealand                                                |
| Markesteijn, Lars             | Lecturer in Forest Sciences                           | Bangor University                                                      | United Kingdom of Great Britain and Northern Ireland (the) |
| Markham, Virginia             | Plant genetics                                        | UC Berkeley                                                            | United States of America (the)                             |
| Märki, Kathi                  | Biologist                                             | SWILD                                                                  | Switzerland                                                |
| Marklund, Maria               | Ecologist                                             | University of Adelaide                                                 | Australia                                                  |
| Marko, Balint                 | Professor                                             | Babes-Bolyai University                                                | Romania                                                    |
| Marko, Peter                  | Associate Professor of Life Sciences                  | University of Hawaii at Manoa                                          | United States of America (the)                             |
| Markones, Nele                | Marine Ecologist                                      | University of Kiel                                                     | Germany                                                    |
| Marks, Sara                   | Research Scientist                                    | Eawag / Sandec                                                         | Switzerland                                                |
| Marks Marino, Dara            | Research Specialist                                   |                                                                        | United States of America (the)                             |
| Marla, Dr. Soma S             | Principal Scientist, Crop Genomics                    | ICAR NBPGR                                                             | India                                                      |
| Marletta, Michael             | Professor of Chemistry and Biochemistry               | University of California, Berkeley                                     | United States of America (the)                             |
| Marmontel, Miriam             | Wildlife researcher                                   | Instituto de Desenvolvimento Sustentável Mamirauá                      | Brazil                                                     |

|                           |                                                        |                                                                                        |                                                            |
|---------------------------|--------------------------------------------------------|----------------------------------------------------------------------------------------|------------------------------------------------------------|
| Marmorek, David           | Environmental Scientist / Aquatic Ecologist            | ESSA Technologies Ltd. / Adjunct Professor at Simon Fraser University                  | Canada                                                     |
| Marmottant, Philippe      | Physics                                                | CNRS                                                                                   | France                                                     |
| Marneweck, Courtney       | PhD Ecology                                            |                                                                                        | South Africa                                               |
| Marolla, Filippo          | PhD student in Ecology                                 | UiT The Arctic University of Norway                                                    | Norway                                                     |
| Marom, Nimrod             | Associate Professor, Paleobiology                      | University of Haifa                                                                    | Israel                                                     |
| Marone, Eduardo           | Full Professor                                         | Center for Marine Studies - UFPR - Visiting UNCuyo                                     | Brazil                                                     |
| Marquardt, William        | Curator and Professor, retired                         | Florida Museum of Natural History, University of Florida                               | United States of America (the)                             |
| Marquardt, Kristina       | Researcher in Rural development                        | Department of Urban and Rural Development, Swedish University of Agricultural Sciences | Sweden                                                     |
| Marque, Clémence          | Pharmacist                                             | Independant                                                                            | France                                                     |
| marquer, veronique        | manager                                                | FTV                                                                                    | France                                                     |
| MARQUER, Didier           | Professor / Geosciences                                | Université Bourgogne Franche-Comté                                                     | France                                                     |
| Marques, J. Tiago         | Researcher                                             | Universidade de Évora                                                                  | Portugal                                                   |
| Marques, Tiago            | Senior Research Fellow                                 | University of St Andrews                                                               | United Kingdom of Great Britain and Northern Ireland (the) |
| Marques, Antonio C        | Professor, Marine Biodiversity & Evolution             | University of São Paulo                                                                | Brazil                                                     |
| Marques, Marcia           | Professor                                              | Federal University of Parana                                                           | Brazil                                                     |
| Marques, Luiz             | Professor                                              | State University of Campinas Unicamp                                                   | Brazil                                                     |
| Marques, Isabel           |                                                        | University of Lisbon                                                                   | Portugal                                                   |
| Marques, Ana Teresa       | PhD student - Ecology                                  | Universidade de Lisboa                                                                 | Portugal                                                   |
| MARQUES, Fernando         | Director                                               | AdP - Águas de Portugal                                                                | Portugal                                                   |
| Marquet, Pablo            | Professor of Ecology                                   | Pontificia UNiversidad Catolica de Chile                                               | Chile                                                      |
| Marquez, Javier Andrés    | Doctor en Ciencias Biológicas                          | Universidad Nacional de Rio Cuarto                                                     | Argentina                                                  |
| Marquez Arroyo, José Luis | Civil Engineer - Water Specialist                      | Environment and Water Agency of Andalusia                                              | Spain                                                      |
| Marquinez, Jorge          | professor, Head of Indurot                             | Indurot, University of Oviedo                                                          | Spain                                                      |
| Marr, Susanne             | PhD Student Ecophysiology/Eco-Metabolomics             | German Centre for Integrative Biodiversity Research (iDiv)                             | Germany                                                    |
| Marra-Biggs, Paolo        | Marine Biologist                                       | University of Hawaii: Manoa                                                            | United States of America (the)                             |
| Marrec, Ronan             | Assistant Professor in Ecology                         | Université de Picardie Jules Verne                                                     | France                                                     |
| Marrón, Aurora            | Ph.D. student                                          | Universidad Nacional Autónoma de México                                                | Mexico                                                     |
| Marschner, Matthias       | Medical doctor                                         | Sankt Gertrauden Hospital Berlin                                                       | Germany                                                    |
| Marsden, Janet            | Sustainability Science and systems                     | Syracuse University                                                                    | United States of America (the)                             |
| Marsden-Ballard, Danielle | Social Ecologist & Climate Change Science Communicator | Sacred Earth Institute                                                                 | Australia                                                  |
| Marsh, Andrew             | Measurement and Standards Scientist                    | NextEra Analytics                                                                      | United States of America (the)                             |
| Marsh, Helene             | Emeritus Professor of Environmental Science            | James Cook University                                                                  | Australia                                                  |
| Marsh, Anke               | Researcher in Palaeoecology                            | Institute of Archaeology, University College London                                    | United Kingdom of Great Britain and Northern Ireland (the) |
| Marshall, Vic             | Retired Biology Professor                              | Jackson College                                                                        | United States of America (the)                             |
| Marshall, Justin          | Prof in Marine Biology and Neuroscience                | University of Queensland                                                               | Australia                                                  |



|                                    |                                                                   |                                                                             |                                                            |
|------------------------------------|-------------------------------------------------------------------|-----------------------------------------------------------------------------|------------------------------------------------------------|
| Marshall, Andrew Robert            | Associate Professor                                               | University of the Sunshine Coast, University of York and Flamingo Land Ltd. | Australia                                                  |
| Marshall, Benjamin                 | Ecologist                                                         | Suranaree University of Technology                                          | Thailand                                                   |
| Marshall, Victor                   | Retired Biology Professor                                         | Jackson College Michigan                                                    | United States of America (the)                             |
| Marsham, John                      | Associate Professor, Weather and Climate Science                  | University of Leeds and National Centre for Atmospheric Science             | United Kingdom of Great Britain and Northern Ireland (the) |
| Marsico, Travis                    | Professor and Curator, Arkansas State University Herbarium (STAR) | Arkansas State University                                                   | United States of America (the)                             |
| Marson Teixeira de Andrade, Renata | Tutor                                                             | Cambridge                                                                   | Brazil                                                     |
| Marston, Richard                   | University Distinguished Professor Emeritus                       | Kansas State University                                                     | United States of America (the)                             |
| martel, an                         | Prof.                                                             | ghent university                                                            | Belgium                                                    |
| Martel, Antera                     | Curator                                                           | Spanish Bank of Algae - BEA University of Las Palmas de GC                  | Spain                                                      |
| Martel, Jocelyn                    | Associate Professor of Biology                                    | York University                                                             | Canada                                                     |
| Martens, Carola                    | PhD student                                                       | Goethe University Frankfurt                                                 | Germany                                                    |
| Martens, Jan                       | Trained Surgeon, Emergency- and Intensive Care Medicine           | Asklepios Kliniken Hamburg                                                  | Germany                                                    |
| Martens, Koen                      | Head of Research                                                  | Royal Belgian Institute of natural Sciences                                 | Belgium                                                    |
| Martí, Eugènia                     | Permanent staff researcher                                        | Centre d'estudis Avançats de Blanes (CEAB-CSIC)                             | Spain                                                      |
| Martí Rodrigo, Pablo               | Medical doctor. Ophthalmologist                                   | Hospital del Mar Barcelona                                                  | Spain                                                      |
| Martignier, Thomas                 | PhD student Biology                                               | University of Lausanne                                                      | Switzerland                                                |
| Martin, Harry                      | scientist / biological chemistry                                  | Plant and Food Research                                                     | New Zealand                                                |
| Martin, Gabrielle                  | Post-doctoral fellow in ecology                                   | IMBE                                                                        | France                                                     |
| Martin, Christophe                 | Researcher, Materials Science                                     | CNRS, Univ. Grenoble Alpes                                                  | France                                                     |
| Martin, Manuel                     | Research engineer                                                 | INRA                                                                        | France                                                     |
| Martin, Maximilian                 | PhD student in Nutrition Science                                  | Leibniz-Institut für Gemüse- und Zierpflanzenbau (IGZ)                      | Germany                                                    |
| Martin, Freddie                    | PhD Candidate                                                     | University of Bristol                                                       | United Kingdom of Great Britain and Northern Ireland (the) |
| Martin, John                       | Honorary Lecturer                                                 | UNSW                                                                        | Australia                                                  |
| Martin, Ryan                       | Professor of Biology                                              | Case Western Reserve University                                             | United States of America (the)                             |
| Martin, John H                     | Physics                                                           |                                                                             | Canada                                                     |
| Martin, Jeff                       | Ecology & Evolutionary Biology                                    | University of TN                                                            | United States of America (the)                             |
| Martin, Emily A.                   | Postdoc                                                           | University of Wuerzburg                                                     | Germany                                                    |
| Martin, Peter                      | Professor, Theoretical Astrophysics                               | University of Toronto                                                       | Canada                                                     |
| Martin, Meghan                     | Director                                                          | PDXWildlife                                                                 | United States of America (the)                             |
| Martin, Marion                     | Retired environmental scientist                                   |                                                                             | United Kingdom of Great Britain and Northern Ireland (the) |
| Martin, Jake                       | PhD candidate                                                     | Monash University                                                           | Australia                                                  |
| Martin, Jean-Louis                 | Senior Scientist, Ecology                                         | CNRS, Montpellier France                                                    | France                                                     |
| Martin, Olivier                    | Research Scientist, Genetics                                      | Institut National de la Recherche Agronomique                               | France                                                     |
| Martin, Rowan                      | Climate change biology                                            | University of Cape Town                                                     | South Africa                                               |

|                             |                                                                                                        |                                                                                                                                        |                                                            |
|-----------------------------|--------------------------------------------------------------------------------------------------------|----------------------------------------------------------------------------------------------------------------------------------------|------------------------------------------------------------|
| Martin, François-Marie      | Ph.D in ecology                                                                                        | Irstea                                                                                                                                 | France                                                     |
| Martin, Patrick             | Assistant Professor                                                                                    | Nanyang Technological University                                                                                                       | Singapore                                                  |
| Martin, Dave                | Biological Sciences                                                                                    | City Of Port Coquitlam                                                                                                                 | Canada                                                     |
| Martin, Bettina             | Biological Oceanography                                                                                | University of Hamburg                                                                                                                  | Germany                                                    |
| Martin, Nicolas             | researcher forest ecology                                                                              | INRA                                                                                                                                   | France                                                     |
| Martin, Gina                | Postdoctoral Associate                                                                                 | Western University                                                                                                                     | Canada                                                     |
| Martin, Thibaud             | entomologist agroecologist                                                                             | Cirad                                                                                                                                  | Côte d'Ivoire                                              |
| Martin, Verene              | Renewable Energy Forecasting Analyst, Data Scientist                                                   |                                                                                                                                        | United States of America (the)                             |
| MARTIN, MEGHAN              | Director                                                                                               | PDXWildlife                                                                                                                            | United States of America (the)                             |
| Martín, Carlos Alfonso      | Profesor - Zoology                                                                                     | Complutense University of Madrid                                                                                                       | Spain                                                      |
| Martín, Ana                 | Forest engineer. Forest pathology.                                                                     | Regional Forest Service.                                                                                                               | Spain                                                      |
| Martín, María P.            | Scientific Researcher                                                                                  | Real Jardín Botánico-CSIC                                                                                                              | Spain                                                      |
| Martín, Lucas               | Researcher                                                                                             | CERZOS (CONICET-UNS)                                                                                                                   | Argentina                                                  |
| Martin Duque, Jose F        | Senior Lecturer                                                                                        | Complutense University of Madrid                                                                                                       | Spain                                                      |
| Martín Esquivel, Jose Luis  | Head of Nature Conservation                                                                            | National Park of Teide - Canary Island Government                                                                                      | Spain                                                      |
| MARTIN GONZALEZ, Ana        | Postdoctoral researcher in Ecology                                                                     | University of Copenhagen                                                                                                               | Denmark                                                    |
| Martín López, Lucía Martina | Postdoctoral research in marine mammal science                                                         | SMRU, Sea Mammal Research Unit, University of St. Andrews                                                                              | Spain                                                      |
| Martín-Forés, Irene         | PostDoc position                                                                                       | Department of Biogeography and Global Change, National Museum of Natural Sciences, Spanish Council for Scientific Research (MNCN-CSIC) | Spain                                                      |
| Martín-Gamboa, Mario        | Postdoctoral researcher                                                                                | University of Aveiro                                                                                                                   | Portugal                                                   |
| martin-jezequel, veronique  | researcher marine biology                                                                              | CNRS                                                                                                                                   | France                                                     |
| MARTIN-PREVEL, YVES         | Epidemiologist in Public Health Nutrition / Director of the Health and Societies Department of the IRD | IRD (The French National research Institute for Sustainable Development)                                                               | France                                                     |
| Martín-Sanz, Ruth Cristina  | Forest sciences                                                                                        | Universidad de Valladolid                                                                                                              | Spain                                                      |
| Martina, Jason              | Assistant Professor of Wetland Ecology                                                                 | Texas State University                                                                                                                 | United States of America (the)                             |
| Martinez, Mathieu           | Assitant professor in Earth Sciences                                                                   | Géosciences Rennes, Université de Rennes 1                                                                                             | France                                                     |
| Martinez, Cristina          | Associate Professor in Physics                                                                         | Universidad Complutense de Madrid                                                                                                      | Spain                                                      |
| Martinez, Pablo A.          | Professor/Researcher Biology                                                                           | Universidad Nacional de Mar del Plata                                                                                                  | Argentina                                                  |
| Martinez, Nicolas           | PhD Student                                                                                            | Museo Nacional de Historia Natural del Paraguay                                                                                        | Paraguay                                                   |
| Martinez, Virginia          | Professor Biologist                                                                                    | Universidad Nacional de Salta                                                                                                          | Argentina                                                  |
| Martinez, Patrick           | Professor of Mathematics                                                                               | University Toulouse 3                                                                                                                  | France                                                     |
| Martinez, Julien            | Postdoctoral fellow                                                                                    | University of Glasgow                                                                                                                  | United Kingdom of Great Britain and Northern Ireland (the) |
| Martinez, Celia             | researcher                                                                                             | CETEMAS                                                                                                                                | Spain                                                      |
| Martinez, Hector            | Professor of Astronomy                                                                                 | Observatorio Astronomico, Universidad Nacional de Cordoba                                                                              | Argentina                                                  |
| Martinez, Maria             | Director of Research                                                                                   | INSERM                                                                                                                                 | France                                                     |
| Martínez, Brezo             | Associate Professor in Marine Ecology                                                                  | Universidad Rey Juan Carlos                                                                                                            | Spain                                                      |
| Martínez, Joaquín           | Sociologist                                                                                            |                                                                                                                                        | Ecuador                                                    |
| Martínez, Paloma            | PhD student                                                                                            | Mrs.                                                                                                                                   | Spain                                                      |

|                                   |                                                                                                     |                                                                                                                                                                                                 |                                                            |
|-----------------------------------|-----------------------------------------------------------------------------------------------------|-------------------------------------------------------------------------------------------------------------------------------------------------------------------------------------------------|------------------------------------------------------------|
| Martínez, Virginia                | Professor                                                                                           | IBIGEO - Universidad Nacional de Salta                                                                                                                                                          | Argentina                                                  |
| Martínez Adriano, Cristian Adrian | Postdoctoral position                                                                               | Facultad de Ciencias Forestales-UANL                                                                                                                                                            | Mexico                                                     |
| Martínez Almoina, Camille         | Ecology                                                                                             | LECA                                                                                                                                                                                            | France                                                     |
| Martínez Arias, Alfonso           | Professor                                                                                           | Department of Genetics, University of Cambridge                                                                                                                                                 | United Kingdom of Great Britain and Northern Ireland (the) |
| Martínez Carretero, Eduardo       | Curator of the Ruiz Laeal (MERL) Herbarium- Director Geobotany and Phytogeography researching group | Instituto Argentino de Investigaciones de las Zonas Áridas (IADIZA)-Consejo Nacional de Investigaciones Científicas y Técnicas (CONICET) / Fac. Cs. Ex. F. Nat. National University of San Juan | Argentina                                                  |
| Martínez Crosa, Gonzalo           | Director, Forestry System Biologist                                                                 | Instituto Nacional de Investigación Agropecuaria                                                                                                                                                | Uruguay                                                    |
| Martínez de Alba, Ángel Emilio    | Researcher in Plant Science                                                                         | Spanish-Portuguese Agricultural Research Centre (CIALE)                                                                                                                                         | Spain                                                      |
| MARTINEZ DE LA VEGA, ALVARO       | GENERAL DIRECTOR                                                                                    | PAIS XXI FOUNDATION                                                                                                                                                                             | Colombia                                                   |
| Martínez del Río, Carlos          | Professor, Ecological Physiology                                                                    | University of Wyoming                                                                                                                                                                           | United States of America (the)                             |
| Martínez Fontaine, Consuelo       | PhD candidate Earth Sciences                                                                        | Université Paris-Saclay                                                                                                                                                                         | France                                                     |
| Martínez Guimera, Alvaro          | Postdoc / Systems Biology                                                                           | Newcastle University                                                                                                                                                                            | United Kingdom of Great Britain and Northern Ireland (the) |
| Martínez Harms, María José        | Postdoctoral researcher / landscape ecologist                                                       | Center of Applied Ecology and Sustainability                                                                                                                                                    | Chile                                                      |
| Martínez Inigo, Laura             | Primatologist                                                                                       |                                                                                                                                                                                                 | Spain                                                      |
| Martínez Lanfranco, Juan Andrés   | PhD student - Ecology                                                                               | University of Alberta                                                                                                                                                                           | Canada                                                     |
| Martínez Rojas, Enriqueta         | Ph.D. in Biotechnology                                                                              | TU Berlin                                                                                                                                                                                       | Germany                                                    |
| Martínez-Aguero, María            | Professor - Biology                                                                                 | Universidad del Rosario                                                                                                                                                                         | Colombia                                                   |
| Martínez-Anaya, Claudia           | Associate Researcher                                                                                | Instituto de Biotecnología, UNAM                                                                                                                                                                | Mexico                                                     |
| Martínez-Arroyo, Amparo           | General Director and Researcher / Ecology and Climate Change                                        | National Institute of Ecology and Climate Change                                                                                                                                                | Mexico                                                     |
| Martínez-Bauer, Angelica          | postdoctoral researcher                                                                             | ECOSUR, San Cristóbal de Las Casas                                                                                                                                                              | Mexico                                                     |
| Martínez-Blancas, Alejandra       | PhD Student Ecology                                                                                 | Universidad Nacional Autónoma de México                                                                                                                                                         | Mexico                                                     |
| Martínez-Botia, Patricia          | PhD student - Biomedicine                                                                           | University of Oviedo / ISPA                                                                                                                                                                     | Spain                                                      |
| Martínez-Crego, Begoña            | Research contract                                                                                   | University of Algarve (CCMAR-UAlg)                                                                                                                                                              | Portugal                                                   |
| Martínez-Fernández, Julia         | Ecologist, Executive director                                                                       | New Water Culture Foundation                                                                                                                                                                    | Spain                                                      |
| Martínez-Fernández, José          | Professor of Physical Geography                                                                     | University of Salamanca                                                                                                                                                                         | Spain                                                      |
| Martínez-Gordillo, Martha         | Botany                                                                                              | Universidad Nacional Autónoma de México (UNAM)                                                                                                                                                  | Mexico                                                     |
| Martínez-Guijosa, Jordi           | MS in Wildlife Research and Management                                                              | Instituto de Investigación en Recursos Cinegéticos (IREC)                                                                                                                                       | Spain                                                      |
| Martínez-Haro, Mónica             | Postdoctoral Researcher                                                                             | IRIAF - Instituto Regional de Investigación y Desarrollo Agroalimentario y Forestal de Castilla-La Mancha                                                                                       | Spain                                                      |
| Martínez-Meier, Alejandro         | Research                                                                                            | INTA, National Institute of Agricultural Technology                                                                                                                                             | Argentina                                                  |
| Martínez-Morales, Miguel Ángel    | Senior Researcher                                                                                   | El Colegio de la Frontera Sur                                                                                                                                                                   | Mexico                                                     |
| Martínez-Ortega, M. Montserrat    | Full Professor                                                                                      | Universidad de Salamanca                                                                                                                                                                        | Spain                                                      |
| Martínez-Sancho, Elisabet         | Postdoc                                                                                             | Swiss Federal Research Institute WSL                                                                                                                                                            | Switzerland                                                |
| Martínez-Vilalta, Jordi           | Forest ecology                                                                                      | CREAF / UAB                                                                                                                                                                                     | Spain                                                      |

|                                |                                                                                        |                                                                                                        |                                                            |
|--------------------------------|----------------------------------------------------------------------------------------|--------------------------------------------------------------------------------------------------------|------------------------------------------------------------|
| Martínez-Villa, Johanna Andrea | Ph.D student                                                                           | Univertié du Quebec a Montreal                                                                         | Canada                                                     |
| Martinez-Yrizar, Angelina      | PhD Researcher, Ecology                                                                | Institute of Ecology, UNAM                                                                             | Mexico                                                     |
| Martinho, Filipe               | Researcher in Marine Biology and Fisheries                                             | University of Coimbra                                                                                  | Portugal                                                   |
| Martiniano, Hugo               | Investigator                                                                           | Instituto Nacional de Saúde Doutor Ricardo Jorge                                                       | Portugal                                                   |
| Martinko, Edward               | Professor Emeritus, Ecology                                                            | University of Kansas, Lawrence Kansas                                                                  | United States of America (the)                             |
| Martino, Manuela               | Chemistry teacher, Ph.D. Marine Chemistry                                              | Hellesdon High School                                                                                  | United Kingdom of Great Britain and Northern Ireland (the) |
| Martino, David                 | Group Leader, clinical epigenetics                                                     | Telethon Kids                                                                                          | Australia                                                  |
| Martinović, Miloš              | Assistant Ornithologist, PhD candidate                                                 | Croatian Academy of Sciences and Arts, Institute of Ornithology                                        | Croatia                                                    |
| Martins, Marlucia              | titular researcher                                                                     | Museu Paraense Emilio Goeldi                                                                           | Brazil                                                     |
| Martins, Marcio                | Professor of Ecology                                                                   | University of Sao Paulo                                                                                | Brazil                                                     |
| Martins, Isabela               | Biologist                                                                              | UFMG                                                                                                   | Brazil                                                     |
| Martins, Celso                 | Professor/Researcher / Zoology and Biology of Bees                                     | Universidade Federal da Paraíba                                                                        | Brazil                                                     |
| Martins, Bruno Herlander       | Biologist                                                                              | CIBIO - Research Centre in Biodiversity and Genetic Resources                                          | Portugal                                                   |
| Martins, Renato                | Postdoc                                                                                | Instituto Nacional de Pesquisas da Amazônia - INPA                                                     | Brazil                                                     |
| Martins, Eduardo               | Assistant Professor                                                                    | University of Northern British Columbia                                                                | Canada                                                     |
| Martins, Adriana               | Assistant Professor                                                                    | Universidade Católica Portuguesa                                                                       | Portugal                                                   |
| Martins, Fábio                 | Research Fellow                                                                        |                                                                                                        | Portugal                                                   |
| Martins, Elton                 | Graduate Student                                                                       | Unip - Universidade Paulista                                                                           | Brazil                                                     |
| Martins, Helen                 | Senior Scientist Emerita                                                               | University of th Azores                                                                                | Portugal                                                   |
| Martins Sobrinho, Paulo Mateus | PhD. Student                                                                           | Universidade Federal Rural de Pernambuco                                                               | Brazil                                                     |
| Martins-Louçao, Maria Amélia   | Full Professor of Ecology                                                              | Centre for Ecology, Evolution and Environmental Sciences. Faculdade de Ciências Universidade de Lisboa | Portugal                                                   |
| Martinson, Kelly               | science writer                                                                         | ksquare writing, inc.                                                                                  | United States of America (the)                             |
| Martinson, Richard             | Ecological Restoration                                                                 | Oregon State University                                                                                | United States of America (the)                             |
| Martiny, Jennifer              | Professor, Ecology and Evolutionary Biology                                            | University of California, Irvine                                                                       | United States of America (the)                             |
| Martiskainen, Olli             | PhD in Physical Chemistry                                                              | University of Turku (Alumni)                                                                           | Finland                                                    |
| Martius, Christopher           | Managing Director, and Team Leader, Climate Change, Bioenergy and Low-Carbon Emissions | Center for International Forestry Research (CIFOR) Germany gGmbH                                       | Germany                                                    |
| Martorell, Carlos              | Full Professor in Ecology                                                              | Universidad Nacional Autónoma de México                                                                | Mexico                                                     |
| marty, gerard                  | associate researcher                                                                   | INRA                                                                                                   | France                                                     |
| Marty, Laëtitia                | Researcher in nanoscience                                                              | CNRS                                                                                                   | France                                                     |
| Marvin, Rosamund               | Physician                                                                              | Garden House                                                                                           | United Kingdom of Great Britain and Northern Ireland (the) |
| Marx-Rattner, Ruth             | Research Associate                                                                     | Johns Hopkins university                                                                               | United States of America (the)                             |
| Marzal, Virginia               | Professor/Urban Development Planner                                                    | National University of Engineering                                                                     | Peru                                                       |
| Marzano, Raffaella             | Assistant Professor                                                                    | University of Torino                                                                                   | Italy                                                      |
| Marzec, Magdalena              | PhD, biologist                                                                         |                                                                                                        | Poland                                                     |
| Mas Jimenez, Gerard            | PhD student                                                                            | Consejo Superior de Investigaciones Científicas                                                        | Spain                                                      |

|                             |                                                                          |                                                                  |                                                            |
|-----------------------------|--------------------------------------------------------------------------|------------------------------------------------------------------|------------------------------------------------------------|
| Mas-Pla, Josep              | Professor                                                                | Universitat de Girona, and Catalan Institute for Water Research  | Spain                                                      |
| Mascall, John               | Psychologist                                                             |                                                                  | United Kingdom of Great Britain and Northern Ireland (the) |
| Mascarenhas, André          | Post-Doc Researcher                                                      |                                                                  | Germany                                                    |
| Maschke, Judith             | research assistant                                                       | artec-sustainability research center (University of Bremen)      | Germany                                                    |
| Masci, Lorella              | Post Doctoral position                                                   | ISTerre (University Grenoble Alpes)                              | France                                                     |
| Mascia, Michael             |                                                                          | Conservation International                                       | United States of America (the)                             |
| Masciale, Rita              | Research Scientist - Hydrogeologist                                      | National Research Council (CNR) -Water Research Institute (IRSA) | Italy                                                      |
| Masclaux, Hélène            | Associate professor, Limnology                                           | Université de Franche Comté                                      | France                                                     |
| Maselli, Luigi J.           | Neuroscientist                                                           | Mediterranean Society of Lifestyle Medicine                      | Italy                                                      |
| Masello, Juan F.            | Principal Investigator                                                   | Justus Liebig University Gießen                                  | Germany                                                    |
| Maser, Chris                | Ecologist/Author: Social-Environmental Sustainability                    | Self-Employed                                                    | United States of America (the)                             |
| Masese, Frank               | Senior Lecturer of Aquatic aSciences                                     | University of Eldoret                                            | Kenya                                                      |
| Masila, Nicodemus           | Environmental health scholar                                             | Flinders university                                              | Australia                                                  |
| Masiliūnas, Dainius         | PhD candidate in Remote Sensing                                          | Wageningen University & Research                                 | Netherlands (the)                                          |
| Masilkova, Michaela         | PhD candidate in zoology                                                 | Faculty of Science, University of South Bohemia                  | Czech Republic (the)                                       |
| Masino, Susan               | Professor of Applied Science / Neuroscience                              | Trinity College                                                  | United States of America (the)                             |
| Masojć, Mirosław            | archaeologist                                                            | University of Wrocław                                            | Poland                                                     |
| Masolele, Robert            | PhD Student on assessing land use change with remote sensing time series | Wageningen university                                            | Netherlands (the)                                          |
| Mason, Samantha             | PhD Student                                                              | Durham University                                                | United Kingdom of Great Britain and Northern Ireland (the) |
| Mason, Lucy                 | Conservation Scientist                                                   | RSPB                                                             | United Kingdom of Great Britain and Northern Ireland (the) |
| Mason, Kate                 | Epidemiology                                                             | University of Liverpool                                          | United Kingdom of Great Britain and Northern Ireland (the) |
| Mason, Euan                 | Professor                                                                | University of Canterbury                                         | New Zealand                                                |
| Masque, Pere                | Professor                                                                | Edith Cowan University                                           | Australia                                                  |
| Masquelier, Timothée        | Permanent researcher / Neuroscience & AI                                 | CNRS                                                             | France                                                     |
| Massa, Federico             | PhD student                                                              | Centro di Ricerca E. Piaggio                                     | Italy                                                      |
| Massabuau, Jean-Charles     | Emeritus Research Director                                               | CNRS & University of Bordeaux                                    | France                                                     |
| Massad, Raia Silvia         | Environmental sciences                                                   | Inra - ecosys                                                    | France                                                     |
| Massaine Moulatlet, Gabriel |                                                                          | Universidad Regional Amazónica Ikiam                             | Ecuador                                                    |
| Massana, Ramon              | Researcher                                                               | Institut de Ciències del Mar, CSIC                               | Spain                                                      |
| Massari, Christian          | Researcher                                                               | Italian National Research Council                                | Italy                                                      |
| Massé, Stéphanie            | Research Associate / Limnology                                           | Université de Rennes 1                                           | France                                                     |
| Massé, Laurent              | Maitre de conférences palaeoclimatology                                  | UMR EPOC Université de Bordeaux                                  | France                                                     |
| Massei, Nicolas             | Professor of Hydrology                                                   | University of Rouen-Normandie                                    | France                                                     |
| massemin, sylvie            | Professor                                                                | IPHC, CNRS                                                       | France                                                     |

|                            |                                                              |                                                                                                         |                                                            |
|----------------------------|--------------------------------------------------------------|---------------------------------------------------------------------------------------------------------|------------------------------------------------------------|
| Massimino, Dario           | Research Ecologist                                           | British Trust for Ornithology                                                                           | United Kingdom of Great Britain and Northern Ireland (the) |
| Massiot, Inès              | Researcher in Physics                                        | CNRS                                                                                                    | France                                                     |
| Massmann, Sarina           | PhD-candidate                                                | University of Groningen                                                                                 | Netherlands (the)                                          |
| Masson, Thierry            | researcher, mathematical physics                             | CNRS                                                                                                    | France                                                     |
| Massot, Manuel             | Researcher in Ecology and Evolution                          | CNRS                                                                                                    | France                                                     |
| Mast, Joy                  | Professor, Geospatial Science and Biogeography               | Carthage College                                                                                        | United States of America (the)                             |
| Masters, Louise            | MSc Conservation Biology                                     | DICE, University of Kent                                                                                | United Kingdom of Great Britain and Northern Ireland (the) |
| Masto, Nick                | Ecology and Conservation                                     | Clemson University                                                                                      | United States of America (the)                             |
| Mastrogiannopoulos, Alex   | PhD Student                                                  | University of Bristol                                                                                   | United Kingdom of Great Britain and Northern Ireland (the) |
| Mataloni, Gabriela         | Principal researcher - Associate Professor                   | CONICET - UNSAM                                                                                         | Argentina                                                  |
| Matas, Antonio J           | Associate Professor of Plant Physiology                      | Universidad de Málaga                                                                                   | Spain                                                      |
| Mateo-Tomás, Patricia      | Lecturer in Zoology, Researcher in Conservation Biology      | Oviedo University                                                                                       | Spain                                                      |
| Mateus, Simao              | Paleontologist                                               | Parque dos Dinossauros da Lourinha                                                                      | Portugal                                                   |
| Mathas, Andrew             | Professor of Mathematics                                     | University of Sydney                                                                                    | Australia                                                  |
| Mathé-Hubert, Hugo         | Evolutionary Ecology                                         |                                                                                                         | France                                                     |
| Mathes, Thomas             | Phd Student                                                  | TU München                                                                                              | Germany                                                    |
| MATHEVET, Raphaël          | Senior scientist                                             | CEFE CNRS Montpellier                                                                                   | France                                                     |
| Mathews, Christopher       | Biochemistry                                                 | Oregon State University                                                                                 | United States of America (the)                             |
| Mathez-Stiefel, Sarah-Lan  | Senior Research Scientist, Ethnobiologist & Human Geographer | Centre for Development and Environment, University of Bern                                              | Switzerland                                                |
| Matiolli, Cleverson Carlos | Plant Biology                                                | Universidade Estadual de Campinas                                                                       | Brazil                                                     |
| Matiu, Michael             | Postdoctoral Fellow (climate sciences)                       | University of Trento                                                                                    | Italy                                                      |
| Matoničkin Kepčija, Renata | Associate Professor, Biology                                 | University of Zagreb, Faculty of Science, Department of Biology                                         | Croatia                                                    |
| Matschoss, Patrick         | Researcher                                                   | Institute for Future Energy and Material Flow Systems                                                   | Germany                                                    |
| Matson, Gary               | Founder/former owner wildlife services laboratory, retired   | MS University of Montana 1969                                                                           | United States of America (the)                             |
| Matsubara, Shizue          | Biologist                                                    | Forschungszentrum Juelich                                                                               | Germany                                                    |
| Matsudo, Marcelo           | Professor - microbiology and biotechnology                   | Universidade Federal de Itajubá                                                                         | Brazil                                                     |
| Matta, Gustavo             | Public health researcher                                     | Oswaldo Cruz Foundation                                                                                 | Brazil                                                     |
| Matta, Micaela             | Postdoctoral Fellow, Chemistry                               | University of Liverpool                                                                                 | United Kingdom of Great Britain and Northern Ireland (the) |
| Matteodo, Magali           | PhD Environmental Sciences                                   | University of Lausanne                                                                                  | Switzerland                                                |
| Mattera, Lorenzo           | Full Professor Physics                                       | University of Genova                                                                                    | Italy                                                      |
| Mattes, Jannika            | Social Sciences                                              | University of Oldenburg                                                                                 | Germany                                                    |
| Matteucci, Giorgio         | Director and Forest Ecologist                                | Inst. for Agriculture and Forest Systems in the Mediterranean of the National Research Council of Italy | Italy                                                      |

|                                           |                                                                                              |                                                                |                                                            |
|-------------------------------------------|----------------------------------------------------------------------------------------------|----------------------------------------------------------------|------------------------------------------------------------|
| Matteuzzo, Marcela Camargo                | Professora/Bióloga/PhD Recursos Naturais and Sciences de l'Environnement Terrestre           | Instituto Federal de Minas Gerais                              | Brazil                                                     |
| Mattheij, Stijn                           | Lecturer/researcher                                                                          | Avans University                                               | Netherlands (the)                                          |
| Matthew, Richard                          | Professor Urban Planning and Public Policy                                                   | University of California Irvine                                | United States of America (the)                             |
| Matthews, Blake                           | Scientist                                                                                    | Eawag                                                          | Switzerland                                                |
| Matthies, Aila-Leena                      | Professor of Social Work                                                                     | University of Jyväskylä                                        | Finland                                                    |
| Matthies, Michael                         | Prof. em. Environmental Systems Research                                                     | University of Osanbrueck                                       | Germany                                                    |
| Matthiesen, Finn                          | Research in Biology Education                                                                | Göttingen University                                           | Germany                                                    |
| Matthysen, Erik                           | Professor in Biology                                                                         | University of Antwerp                                          | Belgium                                                    |
| Mattila, Anniina                          | Postdoctoral researcher, Ecology and Evolutionary Biology                                    | University of Helsinki                                         | Finland                                                    |
| Mattison, Willis                          | MS Ecologist and MPCA Regional Director (retired)                                            | Minnesota Pollution Control Agency (MPCA) now retired          | United States of America (the)                             |
| Mattoni, Camilo                           | Professor and researcher, Biodiversity                                                       | FCEfyN Universidad Nacional de Córdoba - CONICET               | Argentina                                                  |
| Mattos, Sérgio Henrique Vannucchi Leme de | Professor                                                                                    | Universidade Federal de São Carlos (UFSCar)                    | Brazil                                                     |
| Mattox, George                            | Professor/Vertebrate Zoology, Animal Morphology and Phisiology, Systematics and Biogeography | Universidade Federal de São Carlos - campus Sorocaba           | Brazil                                                     |
| Matutinovic, Igor                         | Professor / Ecological economics                                                             | Zagreb School of Economics and Management                      | Croatia                                                    |
| Matzen, Sarick                            | Doctoral Candidate, Soil Biogeochemistry                                                     | University of California-Berkeley                              | United States of America (the)                             |
| Matzner, Christopher                      | Professor of Astronomy and Astrophysics                                                      | University of Toronto                                          | Canada                                                     |
| Maude, Glyn                               | Ecologist                                                                                    | Kalahari Research and Conservation                             | Botswana                                                   |
| Maugis, Pascal                            | Researcher, Water resources and CC adaptation                                                | LSCE                                                           | France                                                     |
| Mauleon, Fernando                         | Retired engineer                                                                             | My own                                                         | Spain                                                      |
| MAUNY, Fred                               | Professor , Public Helath                                                                    | University of Franche-Comté                                    | France                                                     |
| Maure, Damien                             | PdD student in climatology                                                                   | Université de Liège                                            | Belgium                                                    |
| Maurel, Noëlie                            | Postdoctoral researcher, Ecology                                                             |                                                                | Germany                                                    |
| Maurel, Thomas                            | Ensembl Bioinformatician                                                                     | EMBL-EBI                                                       | United Kingdom of Great Britain and Northern Ireland (the) |
| Maurer, Golo                              | KBA Program Leader                                                                           | BirdLife Australia                                             | Australia                                                  |
| Maurer, Dirk                              | Researcher in Biochemistry                                                                   | Uppsala University                                             | Sweden                                                     |
| maury, chloris                            | PhD - Animal Behaviour                                                                       |                                                                | France                                                     |
| Maury, Anaëlle                            | Astrophysicist                                                                               | CEA/DRF/IRFU, Astrophysics department, Paris Saclay University | France                                                     |
| Mausbach, Jelena                          | Postdoc Aquatic Ecology                                                                      | Eawag                                                          | Switzerland                                                |
| Mauvisseau, Quentin                       | PhD candidate                                                                                | Derby University                                               | United Kingdom of Great Britain and Northern Ireland (the) |
| Maxime, Herve                             | Innovation principal scientist                                                               | GSK                                                            | Singapore                                                  |
| Maxwell, Nicholas                         | Emeritus Reader, Philosophy of Science                                                       | University College London                                      | United Kingdom of Great Britain and Northern Ireland (the) |
| May, Michael                              | Graduate Student in Plasma Physics                                                           | Princeton University                                           | United States of America (the)                             |
| May, Xavier                               | researcher in geography                                                                      | Université Libre de Bruxelles                                  | Belgium                                                    |

|                       |                                                          |                                                                   |                                                            |
|-----------------------|----------------------------------------------------------|-------------------------------------------------------------------|------------------------------------------------------------|
| May, Peter            | Full Professor Development, Agriculture and Society      | Federal Rural University of Rio de Janeiro                        | Brazil                                                     |
| May, Franz            | Scientific Director / Geologist                          | Federal Institute for Geosciences and Natural Resources           | Germany                                                    |
| May, Christine        | Principal Coastal Engineer and Climate Scientist         | Silvestrum Climate Associates                                     | United States of America (the)                             |
| May, Jeffrey          | Department of Biological Sciences, Retired               | Marshall University                                               | United States of America (the)                             |
| May-Collado, Laura J  | Marine Biologist                                         | UNIVERSITY OF VERMONT                                             | United States of America (the)                             |
| Maya, Carmen          | Research                                                 | CICESE                                                            | Mexico                                                     |
| Mayar, Morwarid       | Chemistry                                                | Wageningen University                                             | Netherlands (the)                                          |
| Mayaux, Philippe      | Tropical ecology                                         | European Commission                                               | Belgium                                                    |
| Mayer, Leonard        | Microbiologist                                           | retired from CDC                                                  | United States of America (the)                             |
| Mayer, Marie          | MD                                                       |                                                                   | France                                                     |
| Mayer, Matthias       | Professor                                                | Heidelberg University                                             | Germany                                                    |
| Mayeur, Anaël         | Scientific Ecology                                       | University of Paris Sud                                           | France                                                     |
| maymo, vincent        | Assistant Professor                                      | University of Bordeaux                                            | France                                                     |
| mayo, valerie         | neurosciences                                            | university bordeaux                                               | France                                                     |
| Mayoral, Alfredo      | PhD Geography-Postdoctoral fellow                        | GEOLAB UMR 6042 UCA-CNRS                                          | France                                                     |
| Mayr, Antonia         | PostDoc in Tropical Ecology                              | University of Würzburg                                            | Germany                                                    |
| Mayr, Felix           | PhD student in biology                                   | Max Planck Institute for Biology of Ageing                        | Germany                                                    |
| Mays, Chris           | Lecturer in Palaeontology (Mass Extinction)              | University College Cork                                           | Ireland                                                    |
| Maysels, Rachael      | Environmental Scientist                                  | Universidad del Cauca                                             | Colombia                                                   |
| Mazal, Lucas          | PhD student, Evolutionary biology                        | UCA/CNRS                                                          | France                                                     |
| MAZAN, Sylvie         | Director of research, evolutionary developmental biology | CNRS                                                              | France                                                     |
| Mazeau, Solène        | Ingineer Biology and Genetic                             | IPS2                                                              | France                                                     |
| Mazepa, Glib          | PhD student in evolutionary biology                      | Lausanne University and Uppsala University                        | Switzerland                                                |
| Mazoyer, Marie        | Postdoctoral Researcher                                  | CNRM/Météo-France                                                 | France                                                     |
| Mazoyer, Johan        | Postdoctoral fellow in Astronomy                         | California Institute of Technology                                | United States of America (the)                             |
| Mazzara, Bruno M.     | Full Professor Social Psychology                         | University of Rome - Sapienza                                     | Italy                                                      |
| Mazzei, Irene         | KTP Associate                                            | Edinburgh Napier University/Stoane Lighting Ltd                   | United Kingdom of Great Britain and Northern Ireland (the) |
| Mazzilli, Naomi       | Lecturer of hydrogeology                                 | Avignon University                                                | France                                                     |
| Mazzoldi, Carlotta    | Associate Professor                                      | Department of Biologia, University of Padova                      | Italy                                                      |
| Mazzoli, Claudio      | Associate Professor, Applied Petrography                 | University of Padova, Department of Geosciences                   | Italy                                                      |
| Mazzoni, Valerio      | Researcher, entomologist                                 | Fondazione Edmund Mach                                            | Italy                                                      |
| Mazzorana, Bruno      | Natural Hazard Risks                                     | Universidad Austral de Chile - Instituto de Ciencias de la Tierra | Chile                                                      |
| Mbau, Stella Nyambura | Lecturer                                                 | Jomo Kenyatta University of Agriculture and Technology            | Kenya                                                      |
| MBWANA, HAMIDA        | STUDENT- IMBRSea                                         | GHENT UNIVERSITY                                                  | Belgium                                                    |
| McAdam, Scott         | Assistant Profrssor, Botany                              | Purdue University                                                 | United States of America (the)                             |
| McAfee, Kathleen      | Professor, PhD Geography, UC Berkeley                    | San Francisco State University                                    | United States of America (the)                             |
| McBride, John         | Science Education Director                               | Teachink                                                          | South Africa                                               |



|                            |                                                                                          |                                                                             |                                                               |
|----------------------------|------------------------------------------------------------------------------------------|-----------------------------------------------------------------------------|---------------------------------------------------------------|
| McCairns, Scott            | Research Scientist/Chargé de recherche                                                   |                                                                             | France                                                        |
| mccall, peter              | Professor, Earth, Environmental,& Planetary Sciences,<br>Director, Environmental Studies | Case Western Reserve University                                             | United States of America (the)                                |
| McCallin, Shawna           | Postdoctoral researcher                                                                  | EPFL                                                                        | Switzerland                                                   |
| McCallum, Rupert           | Mathematics                                                                              | Last employer University of Tuebingen, seeking work                         | Netherlands (the)                                             |
| McCallum, Hamish           | Professor                                                                                | Griffith University, Environmental Futures Research<br>Institute            | Australia                                                     |
| McCann, Kevin              | Professor, Canadian Research Chair in Biodiversity                                       | University of Guelph                                                        | Canada                                                        |
| McCann, Patrick            | Virology                                                                                 | Retired                                                                     | United States of America (the)                                |
| McCarren, Sam              | PostDoc Biology                                                                          | University of Cape Town                                                     | South Africa                                                  |
| McCarthy, James J.         | Professor of Oceanography                                                                | Harvard University                                                          | United States of America (the)                                |
| McCarthy, Janine           | Public Health                                                                            | Physicians Committee for Responsible Medicine                               | United States of America (the)                                |
| McCarthy, Chris            | Astronomer                                                                               | San Francisco State Univ.                                                   | United States of America (the)                                |
| McCauley, Ross             | Associate Professor of Biology - Plant Biodiversity                                      | Fort Lewis College                                                          | United States of America (the)                                |
| McClagherty, Charles       | Professor Emeritus, Biology                                                              | University of Mount Union                                                   | United States of America (the)                                |
| McCluskey, Shannon         | Wildlife Biologist                                                                       | Washington State University                                                 | United States of America (the)                                |
| McColl, Hugh               | Postdoc - population genetics                                                            | University of Copenhagen                                                    | Denmark                                                       |
| McConkey, Kim              | Ecologist                                                                                | National Institute of Advanced Studies                                      | India                                                         |
| McConnell, Ruby            | Geology                                                                                  | State of Oregon Registered Geologist #2088                                  | United States of America (the)                                |
| McConville, Kristian       | Research Fellow in Marine Biology                                                        | Plymouth Marine Laboratory                                                  | United Kingdom of Great Britain<br>and Northern Ireland (the) |
| McCook, Laurence           | Ocean Conservation and Conservation Science                                              | James Cook University                                                       | Australia                                                     |
| McCormick, Sheila          | Professor, Plant and Microbial Biology                                                   | UC-Berkeley                                                                 | United States of America (the)                                |
| McCormick, Wanda           | Senior Lecturer in Nutritional Biochemistry                                              | University of Northampton                                                   | United Kingdom of Great Britain<br>and Northern Ireland (the) |
| McCormick-Ray, Jerry       | Marine ecologist                                                                         | University of Virginia                                                      | United States of America (the)                                |
| McCoy, Daniel              | Postdoctoral researcher, Atmospheric Science                                             | University of Leeds                                                         | United Kingdom of Great Britain<br>and Northern Ireland (the) |
| McCoy, Karen               | Researcher - Evolutionary Ecology                                                        | CNRS                                                                        | France                                                        |
| McCreery, Kim              | Carnivore Biologist                                                                      | African Wild Dog Conservancy                                                | United States of America (the)                                |
| McCulloh, Katherine        | Associate Professor of Botany                                                            | University of Wisconsin-Madison                                             | United States of America (the)                                |
| McCullough, Deborah        | Professor                                                                                | Michigan State University                                                   | United States of America (the)                                |
| McCullough Hennessy, Sarah | Conservation Biologist                                                                   | San Diego Zoo Institute for Conservation Research                           | United States of America (the)                                |
| McDaniel, Carl             | Professor Emeritus, Visiting Professor                                                   | Rensselaer, Oberlin                                                         | United States of America (the)                                |
| McDermid, Greg             | Professor of Geography                                                                   | University of Calgary                                                       | Canada                                                        |
| McDonald, Marisa           | Graduate student                                                                         | University of Hawaii at Manoa                                               | United States of America (the)                                |
| McDonald, Luke             | Postdoctoral researcher, Natural photonics                                               | University College Cork                                                     | Ireland                                                       |
| McDougall, John            | MD                                                                                       | The McDougall Program, Santa Rosa, CA                                       | United States of America (the)                                |
| McDowell, William          | Professor                                                                                | University of New Hampshire                                                 | United States of America (the)                                |
| McEwan, Amber              | Consultant - Ecology and PhD candidate - Ecology                                         | Riverscapes Freshwater Ecology Ltd and Victoria<br>University of Wellington | New Zealand                                                   |
| McFarland, Kent            | Conservation Biologist                                                                   | Vermont Center for Ecostudies                                               | United States of America (the)                                |

|                     |                                                                                              |                                                                     |                                                            |
|---------------------|----------------------------------------------------------------------------------------------|---------------------------------------------------------------------|------------------------------------------------------------|
| McGee, John         | Professor of Geospatial Extension, Dept. of Forestry                                         | Virginia Tech                                                       | United States of America (the)                             |
| McGonigal, Portiaa  | Master of Science Student, Biology                                                           | University of British Columbia                                      | Canada                                                     |
| McGowan, Alan       | Lecturer, Environmental Studies                                                              | The New School                                                      | United States of America (the)                             |
| McGrath, Gavan      | Adjunct Research Fellow                                                                      | The University of Western Australia                                 | Australia                                                  |
| McGrath, Andrew     | Director of environmental research institute - remote sensing scientist                      | Airborne Research Australia, Flinders University of South Australia | Australia                                                  |
| McGreevy, PAUL      | Professor of Animal Behaviour and Welfare                                                    | University of New England                                           | Australia                                                  |
| MCGREEVY, PAUL      | Professor of Animal Behaviour and Animal Welfare Science                                     | University of Sydney                                                | Australia                                                  |
| McGrouther, Mark    | Senior Fellow                                                                                | Australian Museum                                                   | Australia                                                  |
| McGuire, Krista     | Associate Professor                                                                          | University of Oregon                                                | United States of America (the)                             |
| McHale, Cliona      | Specialist, Environmental Health Sciences                                                    | University of California Berkeley                                   | United States of America (the)                             |
| McIlvenny, Heidi    | PhD student Coastal Ecology                                                                  | Queen's University Belfast                                          | United Kingdom of Great Britain and Northern Ireland (the) |
| McIlwain, Lisa      | Human Geography                                                                              | University of the Sunshine Coast                                    | Australia                                                  |
| McInnes, Allison    | Biological Oceanographer                                                                     |                                                                     | Australia                                                  |
| McIntosh, Angus     | Professor of Freshwater Ecology                                                              | University of Canterbury                                            | New Zealand                                                |
| McIntosh, Anne      | Assistant Professor Biology                                                                  | University of Alberta                                               | Canada                                                     |
| McIntyre, Jason     | Lecturer in Psychology                                                                       | Liverpool John Moores University                                    | United Kingdom of Great Britain and Northern Ireland (the) |
| McIver, Liam        | MSc Student conservation biology                                                             | University of Canterbury                                            | New Zealand                                                |
| McKechie, Andrew    | Professor of Zoology                                                                         | University of Pretoria                                              | South Africa                                               |
| McKee, Suzanne      | PhD in Experimental Psychology                                                               |                                                                     | United States of America (the)                             |
| McKelvy, Alexander  | Evolutionary Biology / Herpetology                                                           |                                                                     | United States of America (the)                             |
| McKenzie, Elizabeth | Honorary Academic (analytical chemist)                                                       | University of Auckland                                              | New Zealand                                                |
| McKenzie, Katherine | Renewable Energy - Research Engineer                                                         | University of Hawaii                                                | United States of America (the)                             |
| McKinney, Shawn     | Ecologist                                                                                    |                                                                     | United States of America (the)                             |
| McKinnon, John      | Senior Lecturer (adjunct)                                                                    | Southern Cross University                                           | Australia                                                  |
| McKittrick, Leo     | Scientific Officer / Citizen Science (& Radon Advice)                                        | Environmental Protection Agency                                     | Ireland                                                    |
| McLaughlin, John    | Associate Professor of Environmental Sciences                                                | Western Washington University                                       | United States of America (the)                             |
| McLaughlin, Robert  | Assistant Air Pollution Control Officer - Retired. Air Quality Regulatory Enforcement Agency | Butte County Air Quality Management District                        | United States of America (the)                             |
| McLeod, Christa     | Environmental Education Park Ranger                                                          | US Fish & Wildlife Service                                          | United States of America (the)                             |
| McLester, Edward    |                                                                                              | Liverpool John Moores University                                    | United Kingdom of Great Britain and Northern Ireland (the) |
| McMahan, Caleb      | Ichthyologist                                                                                | Field Museum of Natural History                                     | United States of America (the)                             |
| McMahon, Dino       | Professor of Entomology                                                                      | Freie Universität Berlin                                            | Germany                                                    |
| McManus, Hilary     | Associate Professor of Biological and Environmental Sciences                                 | Le Moyne College                                                    | United States of America (the)                             |
| McMurray, Nancy     | Psychology                                                                                   | University of Melbourne (retired)                                   | Australia                                                  |
| McNamee, Jason      | Senior Scientist                                                                             | Lucent Biosciences                                                  | Canada                                                     |
| McQueen, Donald     | Emeritus Research Professor                                                                  | York University                                                     | Canada                                                     |

|                                  |                                                                     |                                                              |                                                            |
|----------------------------------|---------------------------------------------------------------------|--------------------------------------------------------------|------------------------------------------------------------|
| McRae, David                     | Applied Environmental Anthropologist - Research Project Coordinator | University of Texas Southwestern                             | United States of America (the)                             |
| MCRAE, MARJORIE                  | Executive Consultant                                                | Opinion Dynamics Corp                                        | United States of America (the)                             |
| McShane, Heather                 | Program Director, McGill Sustainability Systems Initiative          | McGill University                                            | Canada                                                     |
| McWhorter, Andrea                | Research Scientist -Microbiology                                    | University of Adelaide                                       | Australia                                                  |
| McWhorter, Todd                  | Senior Lecturer in Veterinary Physiology                            | University of Adelaide                                       | Australia                                                  |
| McWilliam, Noel                  | Associate Researcher                                                | UEA                                                          | United Kingdom of Great Britain and Northern Ireland (the) |
| Meaden, Geoff                    | Retired Fisheries/GIS researcher                                    | Canterbury Christ Church University                          | United Kingdom of Great Britain and Northern Ireland (the) |
| Meads, Andrew                    | Lecturer, Computer Science                                          | University of Auckland                                       | New Zealand                                                |
| Meaney, Carron                   | Wildlife Ecologist, Meaney Consulting LLC                           | University of Colorado Boulder                               | United States of America (the)                             |
| Meave, Jorge A.                  | Senior Professor/Vegetation Ecology                                 | Universidad Nacional Autónoma de México                      | Mexico                                                     |
| Mecenero, Silvia                 | Biodiversity Conservation                                           |                                                              | South Africa                                               |
| MECHIN, Laurence                 | Researcher                                                          | CNRS                                                         | France                                                     |
| mechling, katherine              | m.d.                                                                | clear creek family practice                                  | United States of America (the)                             |
| Médail, Frédéric                 | Professor of Ecology                                                | Aix Marseille University / IMBE                              | France                                                     |
| Medawar, Evelyn                  | Dual MSc Brain and Mind Sciences                                    | Max Planck Institute for Human Cognitive and Brain Sciences  | Germany                                                    |
| Medda, Rebecca                   | PostDoc                                                             | Max Planck Institute for Medical Research                    | Germany                                                    |
| Medeiros, Renata                 | Lecturer in Medical Statistics                                      | Cardiff University                                           | United Kingdom of Great Britain and Northern Ireland (the) |
| Medeiros Antar, Guilherme        | Ph.D. Candidate, Plant Systematics                                  | Instituto de Biociências - Universidade de São Paulo         | Brazil                                                     |
| Mederos, Jorge                   | Researcher un Entomology                                            | Museu de Ciències Naturals de Barcelona                      | Spain                                                      |
| Medialdea-Carrera, Raquel        | Epidemiologist Fellow                                               | Infectious Disease Control Unit, Ministry of Health of Malta | Malta                                                      |
| Medianero, Francisco Javier      | Professor Archaeology (Dr)                                          | universidad Catolica de Temuco                               | Chile                                                      |
| Medianero Soto, Francisco Javier | Docente-Investigador / Arqueología (Dr.)                            | Universidad Católica de Temuco                               | Chile                                                      |
| Medic, Nikola                    | PhD student in marine ecology                                       | University Of Copenhagen                                     | Denmark                                                    |
| Medina, Liliana                  | MSc LEED AP BD+C Teacher and LCA Researcher                         | Universidad Colegio Mayor de Cundinamarca                    | Colombia                                                   |
| Medina-Sánchez, Juan Manuel      | Senior Lecturer in Ecology                                          | University of Granada                                        | Spain                                                      |
| Medina-Vega, Jose                | PhD candidate                                                       | Wageningen University and Research                           | Netherlands (the)                                          |
| Medina-Vogel, Gonzalo            | Professor                                                           | Universidad Andres Bello                                     | Chile                                                      |
| Medrano García, Sandra           | PhD student                                                         | Universidad Complutense de Madrid                            | Spain                                                      |
| Medronho, Ricardo                | Emeritus Professor                                                  | Federal University of Rio de Janeiro                         | Brazil                                                     |
| Medvedev, Eugene                 | Junior researcher at the Department of Marine Biogeochemistry       | FSBSI Marine Hydrophysical Institute of RAS                  | Russian Federation (the)                                   |
| Mee, Allan                       | PhD Zoology                                                         | University of Sheffield                                      | United Kingdom of Great Britain and Northern Ireland (the) |
| Meek, Jared                      | Graduate Student, Botany                                            | Columbia University                                          | United States of America (the)                             |
| Meekan, Mark                     | Senior Principal Research Scientist                                 | Australian Institute of Marine Science                       | Australia                                                  |

|                               |                                                              |                                                                    |                                                            |
|-------------------------------|--------------------------------------------------------------|--------------------------------------------------------------------|------------------------------------------------------------|
| Meeuwig, Jessica              | Professor of Marine Ecology                                  | University of Western Australia                                    | Australia                                                  |
| Mehra, Anchal                 | PhD Student - Microbiology & Immunology                      | University of North Carolina at Chapel Hill                        | United States of America (the)                             |
| Mehra, Satya Prakash          | Environmental cum Development Professional                   | Rajputana Society of Natural History                               | India                                                      |
| Mehra, Sarita                 | Environmental cum Development Professional                   | Rajputana Society of Natural History                               | India                                                      |
| Mehta, Ph.D., Michael         | Professor, Department of Geography and Environmental Studies | Thompson Rivers University                                         | Canada                                                     |
| Meienburg, Florian            | PhD Student in environmental physics                         | Heidelberg University/ University of Adelaide                      | Germany                                                    |
| Meier, Philipp                | Machine Learning Research                                    | Tiplu GmbH                                                         | Germany                                                    |
| Meier, Christina              | Postdoctoral Fellow                                          | University of Manitoba                                             | Canada                                                     |
| Meier, Petra                  | Professor of Public Health                                   | University of Glasgow                                              | United Kingdom of Great Britain and Northern Ireland (the) |
| Meier, Erich                  | Scientific Section Head (ret.)                               | Dept. of Geography, University of Zurich                           | Switzerland                                                |
| Meigs, Garrett                | Forest Ecologist                                             | Oregon State University                                            | United States of America (the)                             |
| Meijaard, Erik                | Director                                                     | Borneo Futures                                                     | Brunei Darussalam                                          |
| Meijer, Jan Jaap              | Physical Oceanography                                        | Institute for Marine and Antarctic Studies/ University of Tasmania | Australia                                                  |
| Meijering, Jurian             | Lecturer Research Methodology                                | Wageningen University                                              | Netherlands (the)                                          |
| Meillere, Alizee              | Postdoctoral Research Fellow                                 | Deakin University                                                  | Australia                                                  |
| Meinck, Sabine                | Head of Research unit                                        | IEA (education)                                                    | Germany                                                    |
| Meine, CurtCurt               | Senior Fellow                                                | Aldo Leopold Foundation & Center for Humans and Nature             | United States of America (the)                             |
| Meinertzhagen, Hannah         | PhD student biosciences                                      | University of Exeter                                               | United Kingdom of Great Britain and Northern Ireland (the) |
| Meir, Patrick                 | Professor, Forest Ecology                                    | Australian National University                                     | Australia                                                  |
| Meira-Cardete, Pablo Ángel    | PhD                                                          | Universidad de Santiago de Compostela                              | Spain                                                      |
| Meirelles, Pedro              | Assistant Professor                                          | Federal University of Bahia                                        | Brazil                                                     |
| Meiri, Shai                   | Biodiversity                                                 | Tel Aviv University                                                | Israel                                                     |
| Meis, Jacques F.              | Consultant Microbiologist (MD)                               | Canisius Wilhelmina Hospital Nijmegen                              | Netherlands (the)                                          |
| Meisrimler, Claudia-Nicole    | Lecturer Plant Biology                                       | University of Canterbury                                           | New Zealand                                                |
| Meissner, Dieter              | Prof. for Sustainable Energetics                             | Tallinn University of Technology                                   | Estonia                                                    |
| Meissner, Miriam              | Assistant Professor, Cultural Sociology                      | Maastricht University                                              | Netherlands (the)                                          |
| Meißner, Tilo                 | Medical Doctor                                               | Public Health Service                                              | Germany                                                    |
| Mejia, Lorena                 | Microbiology university teacher and researcher               | Universidad San Francisco de Quito                                 | Ecuador                                                    |
| Mejia de loayza, Jose eduardo | Phd candidate                                                | Museu Nacional/ Universidade Federal do Rio de Janeiro             | Brazil                                                     |
| Melaku Canu, Donata           | Marine research scientist                                    | Istituto Nazionale di Oceanografia e di Geofisica Sperimentale OGS | Italy                                                      |
| Melendez, Elvia               | Professor                                                    | University of Puerto Rico-Rio Piedras                              | United States of America (the)                             |
| Melero, Yolanda               | Postdoctoral Researcher                                      | University of Reading                                              | United Kingdom of Great Britain and Northern Ireland (the) |
| Melin, Eric                   | Researcher                                                   | Université de Liège                                                | Belgium                                                    |
| Melis, Claudia                | Associate Professor                                          | Queen Maud University College                                      | Norway                                                     |

|                                |                                                                            |                                                                                         |                                                            |
|--------------------------------|----------------------------------------------------------------------------|-----------------------------------------------------------------------------------------|------------------------------------------------------------|
| Mellado Díaz, Andrés           | Stream ecologist                                                           | Tragsatec                                                                               | Spain                                                      |
| Mellbye, Brett                 | Postdoctoral Research Scientist                                            | Oregon State University                                                                 | United States of America (the)                             |
| Mellink, Eric                  | Senior Researcher, Wildlife ecology and conservation                       | Centro de Investigación Científica y de Educación Superior de Ensenada, B.C.            | Mexico                                                     |
| Melo, Celine                   | Teacher                                                                    | Federal University of Uberlândia                                                        | Brazil                                                     |
| Melo, Bruno                    | Researcher / Ichthyology                                                   | American Museum of Natural History                                                      | United States of America (the)                             |
| Melo de Almeida, Thaís         |                                                                            | Instituto Nacional de Pesquisas da Amazônia                                             | Brazil                                                     |
| Meloro, Carlo                  | Senior Lecturer in Vertebrate Palaeoecology                                | Liverpool John Moores University                                                        | United Kingdom of Great Britain and Northern Ireland (the) |
| Melovski, Dime                 | Wildlife biologist                                                         | Macedonian Ecological Society                                                           | Macedonia, Republic of (the former Yugoslavia)             |
| Melquiond, Adrien              | Postdoc Bioinformatics                                                     | University Medical Center Utrecht - Utrecht University                                  | Netherlands (the)                                          |
| Melton, Sierra                 | NSF Graduate Research Fellow, Geosciences                                  | Pennsylvania State University                                                           | United States of America (the)                             |
| Melton, Bruce                  | Civil Engineer, Director                                                   | Climate Change Now Initiative                                                           | United States of America (the)                             |
| Mena-Nieto, Angel              | Energy and CO2 emissions researcher and Environmental Management Professor | University of Huelva                                                                    | Spain                                                      |
| Menck, Carlos FM               | Professor on Microbiology and Molecular Biology                            | Institute of Biomedical Sciences, University of Sao Paulo                               | Brazil                                                     |
| Mencuccini, Maurizio           | Professor Plant and Ecosystem Ecology                                      | ICREA                                                                                   | Spain                                                      |
| Mendelow, David                | ecology/behavioural biology, 3D animator, lecturer                         | Media Design School                                                                     | New Zealand                                                |
| Mendes, Sara                   | PhD student                                                                | Universidade de Coimbra                                                                 | Portugal                                                   |
| Mendes Alvarenga, Renato Lúcio | PhD in Fungal Biology                                                      | Universidade Federal de Pernambuco                                                      | Brazil                                                     |
| Mendes Pontes, Antonio Rossano | Associate Scientist, Biodiversity                                          | National Institute of Amazonian Research - INPA                                         | Brazil                                                     |
| Mendes Veiga, Miguel           | PhD candidate                                                              | Leibniz Institute für Zoo und Wildtierforschung                                         | Germany                                                    |
| Mendez, Maria                  | Conservation biology                                                       |                                                                                         | Spain                                                      |
| Mendez, Javier                 | Marine Biology                                                             |                                                                                         | United States of America (the)                             |
| Mendez, David                  | PhD Student/ Industrial Engineer                                           | UNAV                                                                                    | Spain                                                      |
| MENDEZ, Loriane                | Marine ecology                                                             | Mediterranean Science Commission (CIESM)                                                | Monaco                                                     |
| MENDEZ ALONZO, RODRIGO         | Researcher Plant Ecology and Physiology                                    | Centro de Investigacion Cientifica y de Educacion Superior de Ensenada, Baja California | Mexico                                                     |
| Mendicini, Daniel Jose         | Profesor de Física                                                         |                                                                                         | Argentina                                                  |
| Mendonça, André                | Associated professor                                                       | University of Brasília                                                                  | Brazil                                                     |
| Mendonça-Furtado, Olívia       | Posdoc                                                                     | University of São Paulo                                                                 | Brazil                                                     |
| Mendoza, Blanca                | Professor                                                                  | Universidad nacional Autonoma de Mexico                                                 | Mexico                                                     |
| MENDOZA, ROBERTO               | PROFESSOR                                                                  | UNIVERSIDAD AUTÓNOMA DE NUEVO LEÓN                                                      | Mexico                                                     |
| MENDOZA ALFARO, ROBERTO        | Professor                                                                  | UANL                                                                                    | Mexico                                                     |
| Mendoza-García, Manuel         | Senior Scientist                                                           | Museo Nacional de Ciencias Naturales                                                    | Spain                                                      |
| Mendoza-Henao, Angela M.       | Biologist Ph.D candidate                                                   | Universidad Nacional Autónoma de Mexico                                                 | Colombia                                                   |
| Meneghel, Melitta              | herpetologist                                                              | Facultad de Ciencias, Universidad de la República                                       | Uruguay                                                    |
| Meneses, Pablo                 | Geographer                                                                 | Universidad Regional Amazónica Ikiam                                                    | Ecuador                                                    |
| Menezes, Carina                | Biologist                                                                  | INSA                                                                                    | Portugal                                                   |

|                              |                                                            |                                                                  |                                                            |
|------------------------------|------------------------------------------------------------|------------------------------------------------------------------|------------------------------------------------------------|
| Menezes, Lucas               | PhD candidate in Physics                                   | University of Campinas (UNICAMP)                                 | Brazil                                                     |
| Mengo, Luciana               | PhD Student                                                | CICTERRA                                                         | Argentina                                                  |
| Menk, Linda                  | Researcher                                                 | University of Salzburg                                           | Austria                                                    |
| Menkhorst, Peter             | Principal Scientist                                        | Arthur Rylah Institute for Environmental Research                | Australia                                                  |
| Menon, Márcio José           | Prof. Colaborator                                          | Universidade Estadual de Campinas                                | Brazil                                                     |
| Menounos, Brian              | Full Professor and Canada Research Chair in Glacier Change | University of Northern British Columbia                          | Canada                                                     |
| Mentesana, Lucia             | PhD student                                                | Max Planck Institute for Ornithology                             | Germany                                                    |
| Mentges, Andrea              | Postdoc                                                    | German Centre for Integrative Biodiversity Research              | Germany                                                    |
| Menzel, Florian              | Assistant Professor, Biology                               | University of Mainz                                              | Germany                                                    |
| menzel Barraqueta, jan-Lukas | Postdoctoral fellowship Ocean biogeochemistry              | Stellenbosch University                                          | South Africa                                               |
| Meraloğlu, Furkan            | PhD Student / International Relations                      | Özyeğin University                                               | Turkey                                                     |
| MERAZ, MONICA                | PROFESSOR                                                  | UNIVERSIDAD AUTÓNOMA METROPOLITANA - IZTAPALAPA                  | Mexico                                                     |
| MERAZ-RODRIGUEZ, MONICA      | PROFESSOR/ENVIRONMENTAL BIOTECHNOLOGY                      | UNIVERSIDAD AUTÓNOMA METROPOLITANA- IZTAPALAPA                   | Mexico                                                     |
| MERCALLI, Luca               | Climatologist, environmental journalist                    | Italian Meteorological Society                                   | Italy                                                      |
| Mercier, Manuel              | Researcher in Cognitive Neuroscience                       | CNRS                                                             | France                                                     |
| MERCIER, JEAN-PAUL           | naturaliste                                                |                                                                  | France                                                     |
| Merckel, Ryan                | Lecturer                                                   | University of Pretoria                                           | South Africa                                               |
| Merckx, Thomas               | Postdoctoral researcher                                    | University of Oulu                                               | Finland                                                    |
| Mercuri, Anna Maria          | Professor                                                  | University of Modena and Reggio Emilia                           | Italy                                                      |
| Meredith, Don                | semi-retired conservation biologist and communicator       | freelance writer and biologist                                   | Canada                                                     |
| Meredith, Helen              | Conservationist                                            | Amphibian Survival Alliance / Synchronicity Earth                | United Kingdom of Great Britain and Northern Ireland (the) |
| Meregalli, Massimo           | Researcher                                                 | University                                                       | Italy                                                      |
| Meretsky, Vicky              | Professor of Environmental Science                         | Indiana University                                               | United States of America (the)                             |
| Mergan, Lucas                | PhD Student                                                | KU Leuven                                                        | Belgium                                                    |
| Mérigot, Bastien             | Associate professor, marine biodiversity                   | Montpelllier Universtiy                                          | France                                                     |
| Merillet, Laurene            | PhD student                                                | Ifremer                                                          | France                                                     |
| Merino, Santiago             | Professor of Research                                      | Higher Council for scientific research (Spain)                   | Spain                                                      |
| Merino Recalde, Nilo         | PhD student                                                | University of Oxford                                             | United Kingdom of Great Britain and Northern Ireland (the) |
| Merino-Ibarra, Martin        | Senior Researcher                                          | Marine Science and Limnology Institute, UNAM                     | Mexico                                                     |
| Merino-Martín, Luis          | Postdoctoral Researcher                                    |                                                                  | France                                                     |
| Merkel, Fabian               | PhD student                                                | EMBL                                                             | Germany                                                    |
| Merker, Stefan               | Curator of Mammals                                         | Staatliches Museum für Naturkunde Stuttgart                      | Germany                                                    |
| MÉROT, Claire                | Post-doc evolutionary biology                              | Université Laval - Institut de Biologie Intégrative des systèmes | Canada                                                     |
| Merquiol, Louise             | PhD Student in Marine biology                              | Stazione Zoologica Anton Dohrn                                   | Italy                                                      |
| Merrey, Douglas              | Social Scientist                                           |                                                                  | United States of America (the)                             |
| Merrick, Melissa             | Assistant Research Scientist                               | University of Arizona                                            | United States of America (the)                             |

|                           |                                                                   |                                                                           |                                                            |
|---------------------------|-------------------------------------------------------------------|---------------------------------------------------------------------------|------------------------------------------------------------|
| Merritt, Robert           | Climate Change project manager                                    | Conservation International                                                | United States of America (the)                             |
| Merselis, Daniel          | Instructor / Coral Biologist                                      | Florida International University                                          | United States of America (the)                             |
| Merskin, Debra            | Professor Emerit                                                  | University of Oregon                                                      | United States of America (the)                             |
| Mertens, Kewan            | post-doctoral researcher                                          | Vrije Universiteit Brussel                                                | Belgium                                                    |
| Mertens, Stephan          | managing editor/biologist                                         | Deutsches Ärzteblatt (German Medical Journal)                             | Germany                                                    |
| Mertens, Jan              | Professor                                                         | Ghent University                                                          | Belgium                                                    |
| Mertin, Paul              |                                                                   | University of Kassel                                                      | Germany                                                    |
| Mertz, Keiko              | Graduate Student Researcher                                       | University of California, Davis                                           | United States of America (the)                             |
| Merz, Bruno               | Professor Hydrology                                               | GFZ German Research Centre for Geosciences                                | Germany                                                    |
| Mesa, Oscar               | Professor, Hydrology                                              | Universidad Nacional de Colombia                                          | Colombia                                                   |
| Mesbah, Laurent           | Governing Board member                                            | International Environment Forum                                           | Bosnia and Herzegovina                                     |
| Mesléard, François        | Research Director/Professor                                       | Tour du Valat Insitute/Avignon University                                 | France                                                     |
| Mesnager, Robin           | Computational toxicologist                                        | King's College London                                                     | United Kingdom of Great Britain and Northern Ireland (the) |
| Mesquita, Geison          | Researcher                                                        | Universitat Autònoma de Barcelona                                         | Spain                                                      |
| Mesquita Neto, José       | Profesor/Biology                                                  | Universidad Católica del Maule                                            | Chile                                                      |
| Mesquita-Joanes, Francesc | Associate Professor of Ecology                                    | University of Valencia                                                    | Spain                                                      |
| Messal, Mandy             | PhD Candidate Genetics                                            | Forestry and Agricultural Biotechnology Institute, University of Pretoria | South Africa                                               |
| Messer, Lauren            | Postdoctoral Fellow                                               | University of Queensland                                                  | Australia                                                  |
| Messerschmid, Thibaud     | PhD student / Botany                                              | Johannes Gutenberg University Mainz                                       | Germany                                                    |
| Messier, Christian        | Professor of forest ecology                                       | UQAM and UQO                                                              | Canada                                                     |
| Mestdag, Sebastiaan       | Postdoctoral researcher                                           | Royal Netherlands Institute of Sea Research                               | Netherlands (the)                                          |
| Mestre, Mireia            | PostDoc                                                           | Universidad de Concepción                                                 | Chile                                                      |
| Mestre, Frederico         | Posdoc researcher/Biogeography                                    | "Rui Nabeiro" Biodiversity Chair, MED Institute, University of Évora      | Portugal                                                   |
| Mestre Arias, Laia        |                                                                   | University of Koblenz-Landau                                              | Germany                                                    |
| Mestres, Francesc         | Associate Professor of Genetics                                   | Universitat de Barcelona                                                  | Spain                                                      |
| Metcalfe, Jacqueline      | Founder & Director                                                | Poaching Prevention                                                       | United Kingdom of Great Britain and Northern Ireland (the) |
| Metón, Isidoro            | Associate Professor                                               | University of Barcelona                                                   | Spain                                                      |
| Metrustry, Rachael        | Public Health                                                     | London School of Hygiene and Tropical Medicine                            | Ireland                                                    |
| Mettouris, Onoufrios      | Biologist                                                         |                                                                           | Cyprus                                                     |
| Metzker, Thiago           | CEO                                                               | IBAM - Instituto Bem Ambiental                                            | Brazil                                                     |
| Metzl, Nicolas            | Senior Scientist, Dr., Oceanography                               | LOCEAN-IPSL, CNRS                                                         | France                                                     |
| Metzler, Glenn            | Biologist, Habitat Conservation and Endangered Species Management | Consultant                                                                | United States of America (the)                             |
| Metzner, Karin            | Principal Investigator, Virology                                  | University of Zurich                                                      | Switzerland                                                |
| Metzner, Christoph        | PostDoc/Visiting Lecturer Computational Neuroscience              | Technische Universität Berlin                                             | Germany                                                    |
| Meulé, Samuel             | Associate Professor in Coastal Dynamics                           | Aix-Marseille University                                                  | France                                                     |
| Meunier, Cécile           | PhD, Evolutionary biology                                         | University of Rennes 1                                                    | France                                                     |

|                      |                                                              |                                                                   |                                |
|----------------------|--------------------------------------------------------------|-------------------------------------------------------------------|--------------------------------|
| Mevenkamp, Manfred   | Professor (Electrical Engineering)                           | University of Applied Sciences Bremen                             | Germany                        |
| Mey, Eberhard        | Research associate, Zoology                                  | Martin-Luther-University Halle-Wittenberg                         | Germany                        |
| Meyer, Denise        | Researcher (Business Psychologist)                           | Reutlingen University                                             | Germany                        |
| Meyer, Vera          | Head of the Department of Applied and Molecular Microbiology | Technische Universität Berlin, Institute of Biotechnology         | Germany                        |
| Meyer, Carsten       | Head of Macroecology & Society Group                         | German Centre for Integrative Biodiversity Research (iDiv)        | Germany                        |
| Meyer, Katrin        | Senior Lecturer and Researcher                               | University of Goettingen                                          | Germany                        |
| Meyer, Christian     | Professor for Palaeoecology                                  | Departement of Environmental Sciences, University of Basel        | Switzerland                    |
| Meyer, Amelie        | Research Fellow                                              | University of Tasmania                                            | Australia                      |
| Meyer, Michel        | Geologist - Geothermal Energy development                    | Services Industriels de Genève                                    | Switzerland                    |
| Meyer, Andreas       | Professor                                                    | Universidade Estadual do Paraná                                   | Brazil                         |
| Meyer, Holger        | Associate Professor and Director of Physics                  | Wichita State University                                          | United States of America (the) |
| Meyer, Grant         | Professor Emeritus                                           | University of New Mexico                                          | United States of America (the) |
| Meyer, Nicole        | Astrophysics                                                 | CNRS                                                              | France                         |
| Meyer, Svenja        | Soil Biology reseacher                                       | University Goettingen                                             | Germany                        |
| Meyer-Lohmann, Sönke | Psychologist / Psychotherapist                               |                                                                   | Germany                        |
| Meyer-Lucht, Yvonne  | Evolutionary biologist, PhD                                  | Uppsala University                                                | Sweden                         |
| Meyer-Vernet, Nicole | Astrophysics                                                 | CNRS/Observatoire de Paris                                        | France                         |
| Meyers, Desiree      | Professor of Biology                                         | Wayne County Community College District                           | United States of America (the) |
| Meynard, Christine   | Researcher                                                   | INRA                                                              | France                         |
| Meys, Joris          | Statistician                                                 | Ghent university                                                  | Belgium                        |
| Meza-Vargas, Vanessa | Ichthyologist                                                | Museo de Historia Natural - UNMSM (MUSM)                          | Peru                           |
| Mezger, Jörg         | Physician, Professor of Hematology/Medical Oncology          | University of Freiburg, Germany                                   | Germany                        |
| Meziti, Alexandra    | Environmental Microbiologist                                 |                                                                   | Greece                         |
| Mezon, Cécile        | Geophysics                                                   | Amoncompte                                                        | France                         |
| Mialon, Arnaud       | research                                                     | CESBIO                                                            | France                         |
| Michael, Pamela      | Spacio-temporal marine ecology                               |                                                                   | United States of America (the) |
| Michaelis, Carlo     | PhD student, Computational Neuroscience                      | University of Goettingen, Third Institute of Physics - Biophysics | Germany                        |
| Michalak, Rudi       | Senior Lecturer, Physics and Astronomy                       | University of Wyoming                                             | United States of America (the) |
| Michalczyk, Łukasz   | Associate Professor/Biology                                  | Jagiellonian University                                           | Poland                         |
| Michalik, Tanja      | PhD in Geosciences/Planetology                               | German Aerospace Center                                           | Germany                        |
| Michalovič, Matúš    | Assistant professor                                          | Comenius University in Bratislava, Faculty of Law                 | Slovakia                       |
| Micheau, Jacques     | Professor in Neuroscience                                    | University of Bordeaux                                            | France                         |
| Michel, Veronique    | Researcher CNRS                                              | CNRS                                                              | France                         |
| Michel, Alice        | MSc in Biology                                               | Uppsala University                                                | United States of America (the) |
| Michel, Magny        | DR-CNRS émérite - palaeoclimatology/palaeoenvironment        | CNRS                                                              | France                         |
| Michel, Gabriela     | postdoctoral researcher                                      | Institute of Neuroinformatics UZH/ETH Zurich                      | Switzerland                    |



|                          |                                                                      |                                                                    |                                                            |
|--------------------------|----------------------------------------------------------------------|--------------------------------------------------------------------|------------------------------------------------------------|
| Michel, Hanno            | Post-Doctoral Researcher in Science Education                        | IPN - Leibniz-Institute for Science and Mathematics Education      | Germany                                                    |
| Michel, Niklas           | Postdoc, Neurophysiology                                             | Max Planck Institute of Experimental Medicine                      | Germany                                                    |
| Michel, Nicole           | Senior Quantitative Ecologist                                        | National Audubon Society                                           | United States of America (the)                             |
| Michell, Rhiannon        | Masters of Science (Zoology)                                         | The University of Melbourne                                        | Australia                                                  |
| Michetti, Melania        | Researcher in Environmental Economics                                | ENEA                                                               | Italy                                                      |
| Michez, Denis            | Professor                                                            | Université de Mons                                                 | Belgium                                                    |
| Mickiewicz, Katarzyna    | Faculty Fellow/ microbiologist                                       | Newcastle University                                               | United Kingdom of Great Britain and Northern Ireland (the) |
| Middendorf, George       | Professor of Biology                                                 | Howard University                                                  | United States of America (the)                             |
| Middleton, Helen         | Cluster Archive Scientist                                            | ESA                                                                | Spain                                                      |
| Midlane, Neil            | Group Sustainability Manager                                         | Wilderness Safaris                                                 | South Africa                                               |
| Mielcarek, Nathalie      | Director of Research                                                 | Inserm                                                             | France                                                     |
| Miele, Vincent           | Research Engineer / Ecological networks                              | CNRS - Biometry & Evolutionary Biology laboratory                  | France                                                     |
| Mietchen, Daniel         | Data scientist                                                       | Data Science Institute, University of Virginia                     | United States of America (the)                             |
| Mietusch, Joachim        | Science Education                                                    | Justus Liebig University                                           | Germany                                                    |
| Miftari, Iliriana        | Dr.agr.                                                              | University of Prishtina                                            | Albania                                                    |
| Migale, Roberta          | Postdoctoral Fellow                                                  | The Francis Crick Institute                                        | United Kingdom of Great Britain and Northern Ireland (the) |
| Mignon-Risse, Raphaël    | PhD Student                                                          | AIM, Université Paris-Diderot                                      | France                                                     |
| Mignot, Juliette         | Oceanographer                                                        | IRD/IPSL/LOCEAN                                                    | France                                                     |
| Migura-Garcia, Lourdes   | Researche/microbiology                                               | IRTA-CReSA                                                         | Spain                                                      |
| Mihai, Florin-Constantin | Researcher III (Ph.D)                                                | "Alexandru Ioan Cuza" University of Iasi                           | Romania                                                    |
| Mihaychuk, James         | Physicist                                                            | Silktember Corporation                                             | Canada                                                     |
| Mihoub, Jean-Baptiste    | Lecturer in Ecology                                                  | Sorbonne Université                                                | France                                                     |
| Miinalainen, Tuuli       | PhD Student / Aerosol research group                                 | University of Eastern Finland                                      | Finland                                                    |
| Mikac, Stjepan           | Vice Dean for Sci.Researches                                         | University of Zagreb Faculty of Forestry                           | Croatia                                                    |
| Mikolajczyk, Lukasz      | Researcher / Nature conservation                                     | The Institute of Nature Conservation, Polish Academy of Sciences   | Poland                                                     |
| Mikos, Matjaz            | Dean of Faculty and Professor of Hydrology and Hydraulic Engineering | University of Ljubljana, Faculty of Civil and Geodetic Engineering | Slovenia                                                   |
| Mikulski, Andrzej        | Assistant Professor                                                  | University of Warsaw                                               | Poland                                                     |
| Mikusinski, Grzegorz     | Associate Professor/Conservation science                             | Swedish University of Agricultural Sciences SLU                    | Sweden                                                     |
| Mila, Borja              | Research scientist                                                   | Consejo Superior de Investigaciones Cientificas                    | Spain                                                      |
| Miladinova, Irena        | Post-Doc                                                             | University of Graz                                                 | Austria                                                    |
| Milagres, Adriana        | PhD student                                                          | Universidade Federal de Lavras                                     | Brazil                                                     |
| MILAGRES, ADRIANA        | Collaborating Researcher                                             | Universidade Federal de Viçosa                                     | Brazil                                                     |
| Milani, Cristina         | Marine biologist                                                     | Hvalsafari Andenes                                                 | Norway                                                     |
| Milanovic, Marija        | Doctoral researcher in Macroecology                                  | Helmholtz-Centre for Environmental Research - UFZ                  | Germany                                                    |
| Milburn, Stuart          | Oceanographer                                                        | UNSW Sydney                                                        | Australia                                                  |
| Milcu, Alexandru         | Researcher                                                           | CNRS Ecotron                                                       | France                                                     |
| Milde, Petra             | Professor                                                            | Bremerhaven University of Applied Sciences                         | Germany                                                    |

|                       |                                                                               |                                                                                                        |                                                            |
|-----------------------|-------------------------------------------------------------------------------|--------------------------------------------------------------------------------------------------------|------------------------------------------------------------|
| Mildrexler, David     | Ecologist                                                                     | Eastern Oregon Legacy Lands                                                                            | United States of America (the)                             |
| Milec, Leona          | PhD candidate in Biology                                                      | Nord University                                                                                        | Norway                                                     |
| Milenkaya, Olga       | Professor of Conservation Biology                                             | Warren Wilson College                                                                                  | United States of America (the)                             |
| Miles, Katie          | PhD Candidate in Glaciology                                                   | Aberystwyth University                                                                                 | United Kingdom of Great Britain and Northern Ireland (the) |
| Miles, Donald         | Professor                                                                     | Ohio University                                                                                        | United States of America (the)                             |
| Milhorance, Carolina  | Researcher in Political Science and Sustainable Development                   | University of Brasilia                                                                                 | Brazil                                                     |
| Miličić, Marija       | Research Associate                                                            | BioSense Institute                                                                                     | Serbia                                                     |
| milinkovitch, thomas  |                                                                               | université de la rochelle                                                                              | France                                                     |
| Militon, Cecile       | Associate professor - Marine microbial ecology                                | Aix-Marseille University - Mediterranean Institute of Oceanography                                     | France                                                     |
| Mill, Aileen          | Senior Lecturer                                                               | Newcastle Univeristy                                                                                   | United Kingdom of Great Britain and Northern Ireland (the) |
| Milla, Ruben          |                                                                               | Universidad Rey Juan Carlos                                                                            | Spain                                                      |
| Millan, Andres        |                                                                               | Murcia University                                                                                      | Spain                                                      |
| Millan Agudo, Lucia   | Conservation Biologist                                                        |                                                                                                        | Spain                                                      |
| Millard, Joseph       | PhD student (pollinator biodiversity change)                                  | University College London                                                                              | United Kingdom of Great Britain and Northern Ireland (the) |
| Millat Martinez, Pere | Medical research fellow                                                       | ISGlobal                                                                                               | Spain                                                      |
| Miller, Michael       | Licensed Civil Engineer                                                       | States of California (#85418) and Hawaii (#15510)                                                      | United States of America (the)                             |
| Miller, Wolfgang      | Ass. Prof.                                                                    | Medical University of Vienna                                                                           | Austria                                                    |
| Miller, Evonne        | Professor of Design Psychology                                                | QUT                                                                                                    | Australia                                                  |
| Miller, John          | Technical Director, 3M Company and EVP of Operations, Real Industry (retired) | University of Wisconsin-Madison, PhD Chem Eng                                                          | United States of America (the)                             |
| Miller, Charles B.    | Professor Emeritus of Oceanography                                            | Oregon State University                                                                                | United States of America (the)                             |
| Miller, Matthew       | PhD Student - Ocean Sciences                                                  | University of Victoria                                                                                 | Canada                                                     |
| Miller, Quinn         | Genetic technologist                                                          | Nationwide children's hospital                                                                         | United States of America (the)                             |
| Miller, Brian         | Conservation Biology                                                          | Dr.                                                                                                    | United States of America (the)                             |
| Miller, Barbara       | Professor of sociocultural anthropology                                       | George Washington University                                                                           | United States of America (the)                             |
| Miller, Margaret      | Research Director/Coral Ecologist                                             | SECORE Int                                                                                             | United States of America (the)                             |
| Miller, Emiline       | Masters student                                                               | University of the Western Cape                                                                         | South Africa                                               |
| Miller, Fiona         | Professor & Chair in Health Management Strategies                             | University of Toronto, Dalla Lana School of Public Health                                              | Canada                                                     |
| Miller, Jennie        | Senior Scientist                                                              | Defenders of Wildlife                                                                                  | United States of America (the)                             |
| Miller, Jonathan P.   | Dr. Biology                                                                   | Museo Nacional de Ciencias Naturales                                                                   | Spain                                                      |
| Miller, Ingo          | Research Assistant                                                            | Institute for chemistry and biology of the marine environment (ICBM), University of Oldenburg, Germany | Germany                                                    |
| Miller, Ian           | PhD Candidate                                                                 | Princeton University and the Rocky Mountain Biological Laboratory                                      | United States of America (the)                             |

|                               |                                                                                                                                                                        |                                                                                                                                                       |                                                            |
|-------------------------------|------------------------------------------------------------------------------------------------------------------------------------------------------------------------|-------------------------------------------------------------------------------------------------------------------------------------------------------|------------------------------------------------------------|
| Miller, Kathryn               | Independent science consultant, Greenpeace Research Laboratories / Honorary Associate Research Fellow College of Life and Environmental Sciences, University of Exeter | Greenpeace Research Laboratories / University of Exeter                                                                                               | United Kingdom of Great Britain and Northern Ireland (the) |
| Miller, Lee                   | Fisheries Biologist (Retired)                                                                                                                                          | California Department of Fish and Wildlife                                                                                                            | United States of America (the)                             |
| Milleret, Cyril               | Postdoc                                                                                                                                                                | norwegian university of life sciences                                                                                                                 | Norway                                                     |
| Millet, Laurent               | Molecular biologist                                                                                                                                                    | IRD                                                                                                                                                   | New Caledonia                                              |
| Millhouser, Paul              | Landscape Ecologist/GIS Specialist                                                                                                                                     | Rocky Mountain Wild                                                                                                                                   | United States of America (the)                             |
| MILLON-FAURE, Karine          | Maître de conférence en didactique des mathématiques                                                                                                                   | Aix-Marseille Université (FRANCE)                                                                                                                     | France                                                     |
| Mills, Gus                    | Ecologist                                                                                                                                                              | School of Biology and Environmental Sciences, University of Mpumalanga, South Africa                                                                  | South Africa                                               |
| Milne, Eleanor                | Coordinator The carbon Benefits Project                                                                                                                                | Colorado State University                                                                                                                             | United Kingdom of Great Britain and Northern Ireland (the) |
| milos, ron                    | Prof. plant & Env. Sciences                                                                                                                                            | Weizmann Institute of Science                                                                                                                         | Israel                                                     |
| Milodowski, David             | Postdoctoral researcher, Ecology and Remote Sensing                                                                                                                    | University of Edinburgh                                                                                                                               | United Kingdom of Great Britain and Northern Ireland (the) |
| Milon, Emilie                 | Marine biologist                                                                                                                                                       | Centre de la Mer de Biarritz                                                                                                                          | France                                                     |
| Milrs, Albie                  | Assistant Professor, Sustainable Community Food Systems                                                                                                                | University of Hawaii- West Oahu                                                                                                                       | United States of America (the)                             |
| Milton, Randy                 | Ecologist                                                                                                                                                              | Nova Scotia Dept. Lands and Forestry                                                                                                                  | Canada                                                     |
| Milton, Suzanne J             | Plant ecologist                                                                                                                                                        | Wolwekraal Conservation and research Organisation                                                                                                     | South Africa                                               |
| Milward, Adrienne             | Professor                                                                                                                                                              | The University of Newcastle                                                                                                                           | Australia                                                  |
| Milz, Tim                     | Biology                                                                                                                                                                | JGU Mainz                                                                                                                                             | Germany                                                    |
| Miñarro, Sara                 | Postdoctoral researcher in Marine Ecology                                                                                                                              | Autonomous University of Barcelona                                                                                                                    | Spain                                                      |
| Miñarro Acosta, Eva           | Researcher and technician (environment)                                                                                                                                | Work, Economic and Social Council of Catalonia                                                                                                        | Spain                                                      |
| Minaudo, Camille              | Postdoc fellow in ecohydrology                                                                                                                                         | Swiss Federal Institute of Technology EPFL                                                                                                            | Switzerland                                                |
| Mincarone, Michael            | Professor / Zoology                                                                                                                                                    | Universidade Federal do Rio de Janeiro                                                                                                                | Brazil                                                     |
| Minchin, Peter                | Principal Scientist, Plant Physiology                                                                                                                                  | Plant and Food Research                                                                                                                               | New Zealand                                                |
| Mincke, Jens                  | PhD Candidate in Ecophysiology                                                                                                                                         | Ghent University                                                                                                                                      | Belgium                                                    |
| Miner, Kimberley              | Research Assistant Professor                                                                                                                                           | University of Maine                                                                                                                                   | United States of America (the)                             |
| Minett, Jessica               | PhD Researcher                                                                                                                                                         | Swansea University                                                                                                                                    | United Kingdom of Great Britain and Northern Ireland (the) |
| Minguez, Laetitia             | Researcher / Ecotoxicology                                                                                                                                             | CNRS                                                                                                                                                  | France                                                     |
| Minier, Christophe            | Professor / Ecotoxicology                                                                                                                                              | Normandie University                                                                                                                                  | France                                                     |
| Minnich, Aljoscha Jan Philipp | PhD candidate                                                                                                                                                          | Universität Hamburg                                                                                                                                   | Germany                                                    |
| Minns, Charles K.             | Adj. Professor of Freshwater Ecology                                                                                                                                   | University of Toronto                                                                                                                                 | Canada                                                     |
| Miño, Carolina Isabel         | Adjunct Researcher - Genetics and Evolution                                                                                                                            | Instituto de Biología Subtropical - IBS , Universidad Nacional de Misiones & Consejo Nacional de Investigaciones Científicas y Tecnológicas - CONICET | Argentina                                                  |
| Miño, Carolina                | Conservation Genetics                                                                                                                                                  | Instituto de Biología Subtropical - Nodo Posadas, UNaM/ CONICET                                                                                       | Argentina                                                  |
| Minot, Joanne                 | Ecologist                                                                                                                                                              | Sharplex Services                                                                                                                                     | United States of America (the)                             |

|                                      |                                                                                                                                                                        |                                                                                            |                                                            |
|--------------------------------------|------------------------------------------------------------------------------------------------------------------------------------------------------------------------|--------------------------------------------------------------------------------------------|------------------------------------------------------------|
| Minshall, Timothy                    | MSc Student                                                                                                                                                            | University of East Anglia                                                                  | United Kingdom of Great Britain and Northern Ireland (the) |
| Minteguiaga Carbajal, Manuel Agustin | Researcher                                                                                                                                                             | University of the Republic (UdelaR)                                                        | Uruguay                                                    |
| Minter, Melissa                      | PhD in climate change ecology                                                                                                                                          | University of York                                                                         | United Kingdom of Great Britain and Northern Ireland (the) |
| Mintz-Woo, Kian                      | Faculty, Philosophy and Environmental Research Institute                                                                                                               | University College Cork                                                                    | Ireland                                                    |
| Miraldo, Andreia                     | Researcher                                                                                                                                                             | Naturhistoriska riksmuseet                                                                 | Sweden                                                     |
| Miramontes, Octavio                  | Full time researcher - Biocomplexity                                                                                                                                   | Universidad Nacional Autónoma de México                                                    | Mexico                                                     |
| Miranda, Paulo                       | Associate Professor of Physics                                                                                                                                         | University of Sao Paulo                                                                    | Brazil                                                     |
| Miranda, Liliana                     | Phd. Mg. Architect                                                                                                                                                     | Cities for life Foro                                                                       | Peru                                                       |
| Mireles, Alejandra                   | Biologist - Phycology                                                                                                                                                  | UNAM                                                                                       | Mexico                                                     |
| Miró, Alexandre                      | Researcher                                                                                                                                                             |                                                                                            | Spain                                                      |
| Mirowski, Piotr                      | Staff Research Scientist                                                                                                                                               | DeepMind                                                                                   | United Kingdom of Great Britain and Northern Ireland (the) |
| Mirrashidi, Kathleen                 | Microbiology, immunology & Molecular Genetics                                                                                                                          |                                                                                            | United States of America (the)                             |
| Mischke, Steffen                     | Professor of Geology                                                                                                                                                   | University of Iceland                                                                      | Iceland                                                    |
| Misguich, Grégoire                   | Physicist                                                                                                                                                              | Commissariat à l' énergie atomique et aux énergies alternatives (CEA)                      | France                                                     |
| Misguich, Jacques                    | Senior physicist Theoretical physics and Chaos                                                                                                                         | Commissariat à l'Energie Atomique C.E.A.                                                   | France                                                     |
| Mishler, Brent                       | Professor                                                                                                                                                              | University of California, Berkeley                                                         | United States of America (the)                             |
| Mishra, Priyanka                     | Plant science                                                                                                                                                          | MPIPZ                                                                                      | Germany                                                    |
| Mishra, Rashmish                     | Researcher in Theoretical Particle Physics                                                                                                                             | Scuola Normale Superiore, Pisa, Italy                                                      | Italy                                                      |
| Mishra, Anamika                      | Scientist                                                                                                                                                              | Czech Academy Of Sciences                                                                  | Czech Republic (the)                                       |
| Mishra, Kumud Bandhu                 | Scientist                                                                                                                                                              | Global Change Research Institute                                                           | Czech Republic (the)                                       |
| Mishra, Vandana                      | Postdoc in Biology                                                                                                                                                     | National Institutes of Health Bethesda                                                     | United States of America (the)                             |
| Misslin, Renaud                      | Postdoc geography/agronomy                                                                                                                                             | INRA                                                                                       | France                                                     |
| Mitchard, Edward T.A.                | Senior Lecturer, School of GeoSciences                                                                                                                                 | University of Edinburgh                                                                    | United Kingdom of Great Britain and Northern Ireland (the) |
| mittchell, floyd                     | civil/Environmental Engineer                                                                                                                                           | MS Environmental Engineering, Univ. California Berkeley                                    | United States of America (the)                             |
| Mitchell, Randy                      | Professor of Biology                                                                                                                                                   | University of Akron                                                                        | United States of America (the)                             |
| Mitchell, Richard                    | (Former) Sr. Dlr. Pharmacology (MDS Pharma Services, Director of Business Development (Fred Hutchinson Cancer Research Center), VP Business Development (EnWave Corp.) | (Currently Retired) - formerly Fred Hutchinson Cancer Research Center, MDS Pharma Services | United States of America (the)                             |
| Mitchell, Edward A. D.               | Full Professor, Biology                                                                                                                                                | University of Neuchâtel                                                                    | Switzerland                                                |
| Mitchell, Kelly                      | Cryptocurrency trader / writer                                                                                                                                         | Amazix                                                                                     | Canada                                                     |
| Mitchell, Andrew                     | Environmental Social Science                                                                                                                                           |                                                                                            | United Kingdom of Great Britain and Northern Ireland (the) |
| Mitchell-Olds, Thomas                | Professor of Biology                                                                                                                                                   | Duke University                                                                            | United States of America (the)                             |
| Mitiki, Anteneh                      | Research assistant                                                                                                                                                     | Addis Ababa University                                                                     | Ethiopia                                                   |

|                             |                                                                  |                                                                 |                                                            |
|-----------------------------|------------------------------------------------------------------|-----------------------------------------------------------------|------------------------------------------------------------|
| Mitri, Sara                 | Assistant Professor in Microbiology                              | University of Lausanne                                          | Switzerland                                                |
| Mittal, Neha                | Research Fellow                                                  | University of Leeds                                             | United Kingdom of Great Britain and Northern Ireland (the) |
| Mittelbach, Moritz          | Ecology                                                          |                                                                 | Germany                                                    |
| Mitten, Stephen             | Advanced Lecturer in Environmental Science                       | Loyola University Chicago                                       | United States of America (the)                             |
| Mittermüller, Julia         | Environmental Sociology                                          | LMU Munich                                                      | Germany                                                    |
| Mix, Alan                   | Professor of Earth, Ocean, and Atmospheric Sciences              | Oregon State University                                         | United States of America (the)                             |
| Miyaki, Cristina            | Associate Professor                                              | Universidade de São Paulo                                       | Brazil                                                     |
| Mizutani, Hiroshi           | Senior Scientist                                                 | Institute of Sociogeochemistry                                  | Japan                                                      |
| Mjadwesch, Raymond          | Consulting Ecologist                                             | Mjadwesch Environmental Service Support                         | Australia                                                  |
| mobini, sahba               | Postdoctoral Researcher - MSCA_IF                                | IMN-CSIC                                                        | Spain                                                      |
| Möbs, Jakob                 | PhD Student / Chemistry                                          | Philipps-Universität Marburg, Fachbereich Chemie                | Germany                                                    |
| Mochan, W Luis              | Investigador Titular, ICF                                        | Universidad Nacional Autónoma de México                         | Mexico                                                     |
| Mocilnikar, Antoine-Tristan | PhD Mathematics                                                  | PEPS                                                            | France                                                     |
| Mock, Douglas               | George Lynn Cross Research Professor Emeritus                    | University of Oklahoma                                          | United States of America (the)                             |
| Modi, Albert                | Crop Science                                                     | University of KwaZulu_Natal                                     | South Africa                                               |
| Moe, Jannicke               | Senior Researcher                                                | Norwegian Institute for Water Research                          | Norway                                                     |
| Moehrenschrager, Axel       | Director of Conservation & Science                               | Calgary Zoological Society                                      | Canada                                                     |
| Moehs, Charles              | Plant Genetics                                                   |                                                                 | United States of America (the)                             |
| Moen, Jon                   | Professor Ecology                                                | Umeå University                                                 | Sweden                                                     |
| Moeris, Samuel              | PhD Researcher (Ecotoxicology)                                   | Ghent University                                                | Belgium                                                    |
| Moffat, Jennica             | Graduate Student                                                 | California State University, Northridge                         | United States of America (the)                             |
| Moffat, Ryssa               | PhD candidate, Cognitive Science                                 | Macquarie University                                            | Australia                                                  |
| Mohamed, Kamal              | Professor and Director of Rice Creek Field Station               | SUNY at Oswego                                                  | United States of America (the)                             |
| Mohanlal, Shanice           | Environmental and Water Science                                  | University of the Western Cape                                  | South Africa                                               |
| Mohanty, Jitendra           | Former Sr. Principal Scientist                                   | CSIR-Institute of Minerals & Materials Technology               | India                                                      |
| Mohapatra, Souryabrata      | Research Associate, Department of Liberal Arts (Field-Economics) | Indian Institute of Technology Hyderabad                        | India                                                      |
| Möhler, Henrike             | Ecology                                                          | Kiel University                                                 | Germany                                                    |
| Mohr, Franziska             | PhD Geography                                                    | WSL                                                             | Switzerland                                                |
| Mohr, Christine             | Professor Psychology                                             | University of Lausanne                                          | Switzerland                                                |
| Mohr, Dunja                 | Senior Scientist /English Lit - Anthropocene Studies             | University of Erfut                                             | Germany                                                    |
| Mohren, Frits               | Professor of Forest Ecology and Forest Management                | Wageningen University                                           | Netherlands (the)                                          |
| Mohsen, Osama               | PhD student, Physics                                             | Northern Illinois University                                    | United States of America (the)                             |
| Moinet, Marie               | epidemiologist                                                   | Massey University                                               | New Zealand                                                |
| Moiroux, Nicolas            | Researcher, medical entomology                                   | Institut de Recherche pour le Développement (IRD)               | France                                                     |
| Moizo, Bernard              | Senior Social Anthropologist, head of Lab                        | Institute for Research and Sustainable Development (IRD-France) | France                                                     |
| Mojica, Mary                | Researcher                                                       | FNUSA                                                           | Czech Republic (the)                                       |
| Mojica Piscioti, Mary Luz   | Postdoctoral Researcher                                          |                                                                 | Czech Republic (the)                                       |

|                             |                                                                                    |                                                                                                                      |                                                            |
|-----------------------------|------------------------------------------------------------------------------------|----------------------------------------------------------------------------------------------------------------------|------------------------------------------------------------|
| Mojzeš, Peter               | Associate professor / Biophysics                                                   | Charles University, Faculty of Mathematics and Physics                                                               | Czech Republic (the)                                       |
| Mokobela, Masego Jeneje     | Zoology                                                                            | Botswana International University of Science and Technology                                                          | Botswana                                                   |
| Mokus, Nico                 | PhD student, sea ice science                                                       | University of Otago                                                                                                  | New Zealand                                                |
| Mol, Jolanta                | Biology teacher                                                                    | Upper Secondary School                                                                                               | Poland                                                     |
| Molander, Sverker           | Full Professor of Environmental Systems and Risk                                   | Environmental Systems Analysis, Department of Technology Management and Economics, Chalmers University of Technology | Sweden                                                     |
| Moldan, Bedřich             | Professor environmental sciences                                                   | Charles University                                                                                                   | Czech Republic (the)                                       |
| Moldes, Óscar A.            | Physical Chemistry                                                                 | University of Vigo                                                                                                   | Spain                                                      |
| Molero, Dimitri             | doctoral candidate, education                                                      | Humboldt University of Berlin                                                                                        | Germany                                                    |
| Molewa, Dineo               | Medical Virology                                                                   | University of Pretoria                                                                                               | South Africa                                               |
| Mölg, Nico                  | PhD Candidate, Geography                                                           | University of Zurich                                                                                                 | Switzerland                                                |
| Molia, Sophie               | Veterinary epidemiology                                                            | CIRAD                                                                                                                | France                                                     |
| Molina, Ana                 | Botanist                                                                           | University of León (Spain)                                                                                           | Spain                                                      |
| Molina, Marco               | Fundador Representante RAIS AC                                                     | Redes de Apoyo Inteligente y Sostenido AC                                                                            | Mexico                                                     |
| Molina, Ariel de Andrade    | PhD student in Tropical Botany                                                     | INPA - Amazonian National Institute of Research                                                                      | Brazil                                                     |
| Molina Freaner, Francisco   | Professor/Ecology                                                                  | Universidad Nacional Autónoma de México                                                                              | Mexico                                                     |
| Molina Torres, Jorge        | Researcher Plants Biochemistry                                                     | CINVESTAV U. Irapuato                                                                                                | Mexico                                                     |
| Molina-García, Alejandro    | PhD, Leadership on Health and Climate Change                                       | Ministry of Health at Michoacan State                                                                                | Mexico                                                     |
| Molina-Henao, Edward Hernan | Researcher                                                                         | Universidad del Valle                                                                                                | Colombia                                                   |
| Molina-Navarro, Eugenio     | Assistant Professor in External Geodynamics                                        | University of Alcalá                                                                                                 | Spain                                                      |
| Molina-Venegas, Rafael      | Postdoctoral researcher in (plant) Ecology and Evolution                           | University of Alcalá                                                                                                 | Spain                                                      |
| Molinari, Sergio            | Research Director - Astrophysics                                                   | Istituto Nazionale di Astrofisica (INAF)                                                                             | Italy                                                      |
| Molinari-Jobin, Anja        | Conservation Biologist                                                             | Progetto Lince Italia                                                                                                | Italy                                                      |
| Molinas-González, Carlos R. | PhD-Student                                                                        | University of Granada                                                                                                | Paraguay                                                   |
| Molinero, Jon               | Lecturer Researcher                                                                | Pontificia Universidad Católica del Ecuador                                                                          | Ecuador                                                    |
| Molinié, Gilles             | Professor/organic farmer                                                           | IGE                                                                                                                  | France                                                     |
| Molino, Jean-François       | Senior Scientist, Tropical Ecology                                                 | IRD                                                                                                                  | France                                                     |
| Moll, Eugene                | Extraordinary Professor in the Department of Biodiversity and Conservation Biology | University of the Western Cape                                                                                       | South Africa                                               |
| Mollá, Salvador             | Profesor Titular de Universidad                                                    | Universidad Autónoma de Madrid                                                                                       | Spain                                                      |
| Möller, Moritz              | PhD Student, Computational Neuroscience                                            | University of Oxford                                                                                                 | United Kingdom of Great Britain and Northern Ireland (the) |
| Möller, Klas Ove            | Biological Oceanographer                                                           | Helmholtz-Zentrum Hereon                                                                                             | Germany                                                    |
| Möller, Christina           | Professorin                                                                        | Fachhochschule Dortmund                                                                                              | Germany                                                    |
| Mollison, Ewan              | Postdoctoral Research Associate, Evolutionary Biology                              | University of Edinburgh                                                                                              | United Kingdom of Great Britain and Northern Ireland (the) |
| Möllmann, Christian         | Professor Fisheries Science                                                        | Hamburg University                                                                                                   | Germany                                                    |
| Mologni, Luca               | Associate Professor of Molecular Biology                                           | University of Milano-Bicocca                                                                                         | Italy                                                      |

|                               |                                                              |                                                                                  |                                |
|-------------------------------|--------------------------------------------------------------|----------------------------------------------------------------------------------|--------------------------------|
| Moloney, Coleen               | Associate Professor, Marine ecologist                        | University of Cape Town                                                          | South Africa                   |
| Mols, Bjorn                   | PhD student Ecology                                          | University of Groningen                                                          | Netherlands (the)              |
| Mombrial, Florian             | Biologiste                                                   | Conservatoire et jardin botaniques de la Ville de Genève                         | Switzerland                    |
| Mömken, Julia                 | Postdoc                                                      | Institute of Meteorology and Climate Research, Karlsruhe Institute of Technology | Germany                        |
| Mommer, Liesje                | Full Professor Plant Ecology                                 | Wageningen University                                                            | Netherlands (the)              |
| Monachello, Dario             | Biology                                                      | INRA                                                                             | France                         |
| Monaco, Andrea                | Public Officer - Biodiversity Conservation Unit              | Lazio Regional Government                                                        | Italy                          |
| Monaco, Daniela               | Postdoctoral Fellow                                          | Emory University                                                                 | United States of America (the) |
| Monadjem, Ara                 | Professor, Zoology                                           | University of Eswatini                                                           | Swaziland                      |
| Moncef, Masmoudi              | Professor                                                    | National Institute of Agronomy of Tunisia / University of Carthage               | Tunisia                        |
| Monchalin, Renee              | Assistant professor                                          | University of Victoria                                                           | Canada                         |
| Monchanin, Coline             | PhD student                                                  | Research Center on Animal Cognition                                              | France                         |
| Moncrieff, Glenn              | Ecologist                                                    | South African Environmental Observation Network                                  | South Africa                   |
| Mondal, Himadri               | Scientist A                                                  | Bombay Natural History Society                                                   | India                          |
| Mondardini, Rosy              |                                                              | Citizen Science Center Zurich                                                    | Switzerland                    |
| Mondet, Boris                 | PhD in Engineering Acoustics                                 | Technical University of Denmark                                                  | Denmark                        |
| Mondet, Fanny                 | Researcher                                                   | INRA                                                                             | France                         |
| Mondino, Cristina             | PhD candidate in physics                                     | New York University                                                              | United States of America (the) |
| Mondino, Elena                | PhD candidate in Environmental Analysis                      | Uppsala University                                                               | Sweden                         |
| Mondragón Kemper, Angel Farid | Marine Biology                                               | Universidad Austral de Chile                                                     | Chile                          |
| Monier, Cyril                 | Searcher Neuroscience                                        | CNRS                                                                             | France                         |
| Monismith, Stephen            | Professor of Civil and Environmental Engineering             | Stanford University                                                              | United States of America (the) |
| Monk, Julia                   | Ph.D. Candidate in Ecology                                   | Yale School of Forestry and Environmental Studies                                | United States of America (the) |
| Mönkkönen, Mikko              | Professor                                                    | University of Jyväskylä                                                          | Finland                        |
| MONMANY GARZIA, A. Carolina   |                                                              | CONICET-UNT                                                                      | Argentina                      |
| Monnahan, Cole                | Researcher in Quantitative Ecology                           | University of Washington                                                         | United States of America (the) |
| Monneau, Yoan                 | Researcher in structural biology                             | Institute of Analytical Science                                                  | France                         |
| Monnier, Benjamin             | Engineer                                                     | Museum National d'Histoire Naturel                                               | France                         |
| Monnin, Thibaud               | Research Director                                            | CNRS / Sorbonne Université, Paris                                                | France                         |
| Monrós, Juan S.               | Professor of Ecology                                         | University of Valencia                                                           | Spain                          |
| Mons, Ute                     | University Professor of Cardiovascular Epidemiology of Aging | University of Cologne                                                            | Germany                        |
| Monsees, Hendrik              | PostDoc, Aquaculture and Aquaponics                          | Leibniz-Institute of Freshwater Ecology and Inland Fisheries                     | Germany                        |
| Monsel, Juliette              | Physics                                                      | Univ. Grenoble Alpes                                                             | France                         |
| Monsigny, Michel              | Professor Biochemistry                                       | University of Orléans France                                                     | France                         |
| MONTAGGIONI, LUCIEN           | Professor Emeritus of Geosciences                            | Aix-Marseille University                                                         | France                         |
| Montagna, Paolo               | Researcher                                                   | Institute of Polar Sciences                                                      | Italy                          |
| Montagnani, Giovanni Ludovico | Researcher in Nuclear Electronics                            | Politecnico di Milano                                                            | Italy                          |

|                               |                                                                                |                                                                      |                                                            |
|-------------------------------|--------------------------------------------------------------------------------|----------------------------------------------------------------------|------------------------------------------------------------|
| Montagnat, Maurine            | Researcher / Glaciology                                                        | CNRS                                                                 | France                                                     |
| Montagnoli, Antonio           | Researcher in Environmental and Applied Botany                                 | University of Insubria, Department of Biotechnology and Life Science | Italy                                                      |
| Montalban-Lopez, Manuel       | Associate Professor                                                            | University of Granada                                                | Spain                                                      |
| Montana, Quinn                | Geography                                                                      | UARK                                                                 | United States of America (the)                             |
| Montant, Marie                | neurosciences                                                                  | university AMU                                                       | France                                                     |
| Montefalcone, Monica          | Researcher                                                                     | University of Genoa                                                  | Italy                                                      |
| Monteiro, Alexandra           | Environmental researcher                                                       | University of Aveiro                                                 | Portugal                                                   |
| Monteiro Neves, Frederico     | Professor                                                                      | Southern Bahia Federal University (UFSB)                             | Brazil                                                     |
| Montejo Ráez, Arturo          | Assistant Professor                                                            | Universidad de Jaén                                                  | Spain                                                      |
| Montenegro, Maywa             | UC President's Postdoctoral Fellow                                             | UC Davis, Department of Human Ecology                                | United States of America (the)                             |
| Monteoliva, Agustín           | Consultant on aquatic ecology                                                  | Ecohydros                                                            | Spain                                                      |
| Montero, Andres               | Researcher / Solar energy                                                      | Universidad de Cuenca                                                | Ecuador                                                    |
| Montero, B. Karina            | Postdoc                                                                        | Universidad de Costa Rica                                            | Costa Rica                                                 |
| Montero, Carolina             | Researcher                                                                     | CONICET                                                              | Argentina                                                  |
| Monterroso-Rivas, Alejandro   | Scientists                                                                     | Universidad Autónoma Chapingo                                        | Mexico                                                     |
| Montès, Nicolas               | Senior lecturer                                                                | LPED Aix-Marseille Université                                        | France                                                     |
| Montes Vadillo, Elba María    | PhD student in Biodiversity and Project Manager in the Ibiza island Government | Valencia University and Ibiza Island Government                      | Spain                                                      |
| Montesdeoca-Esponda, Sarah    | Postdoctoral researcher in Chemistry                                           | Universidad de Las Palmas de Gran Canaria                            | Spain                                                      |
| Montesinos, Daniel            | Senior Research Fellow                                                         | James Cook University                                                | Australia                                                  |
| Montginoul, Marielle          | Economist                                                                      | UMR G-Eau Irstea Université de Montpellier                           | France                                                     |
| Montgomerie, Robert           | Professor and Research Chair in Evolutionary Biology                           | Queen's University                                                   | Canada                                                     |
| Montgomery, Hugh              | Professor of Intensive Care Medicine                                           | University College London                                            | United Kingdom of Great Britain and Northern Ireland (the) |
| Monticelli, Patrícia Ferreira | Professor                                                                      | University of São Paulo                                              | Brazil                                                     |
| Montiel, Fabien               | Lecturer in Applied Mathematics                                                | University of Otago                                                  | New Zealand                                                |
| Montiel Mendez, Oscar Javier  | Professor                                                                      | Universidad Autonoma de Ciudad Juarez                                | Mexico                                                     |
| Montoro Girona, Miguel        | Professor in Forest Ecology                                                    | Univrsity of Quebec in Abitibi                                       | Canada                                                     |
| Montoya, Guillermo            | Professor                                                                      | NNf-CPR UNiversity of Copenhagen                                     | Denmark                                                    |
| Montoya, Eladio               | Prof. Emérito                                                                  | Universidad de Alcalá                                                | Spain                                                      |
| Montoya, José                 | Researcher / Professor                                                         | Universidad de Las Américas                                          | Ecuador                                                    |
| Montoya-Lerma, James          | Professor                                                                      |                                                                      | Colombia                                                   |
| Montpiéd, Pierre              | Ingénieur de recherche                                                         | INRA                                                                 | France                                                     |
| Montserrat Larrosa, Marta     | Tenured Scientist                                                              | Spanish National Research Council (IHSM La Mayora-UMA-CSIC)          | Spain                                                      |
| Monzon, Javier                | Ecologist                                                                      | Pepperdine University                                                | United States of America (the)                             |
| Mooi, Randall                 | Curator of Zoology                                                             | The Manitoba Museum                                                  | Canada                                                     |
| Moola, Faisal                 | Associate Professor                                                            | Department of Geography, Environment and Geomatics                   | Canada                                                     |
| Moor, Mari                    | Senior Research Fellow of Plant Ecology                                        | University of Tartu                                                  | Estonia                                                    |
| Moore, Harry                  | PhD candidate                                                                  | Charles Sturt University                                             | Australia                                                  |



|                             |                                                                                                                                                                                                   |                                                                                                    |                                                               |
|-----------------------------|---------------------------------------------------------------------------------------------------------------------------------------------------------------------------------------------------|----------------------------------------------------------------------------------------------------|---------------------------------------------------------------|
| Moore, Sarah                | Graduate Student in Biology                                                                                                                                                                       | Indiana State University                                                                           | United States of America (the)                                |
| Moore, Abigail              | Marine and Fisheries Science                                                                                                                                                                      | Universitas Hasanuddin                                                                             | Indonesia                                                     |
| Moore, Jared                | Forest Researcher                                                                                                                                                                                 | Yale-NUS College                                                                                   | Singapore                                                     |
| Moore, Robert               | Professor Emeritus, Oceanography                                                                                                                                                                  | Dalhousie University                                                                               | Canada                                                        |
| Moore, Michael              | Professor & Emeritus PML Fellow; Consultant<br>Environmental Toxicologist, Molecular Cell<br>Pathologist & Systems Biologist                                                                      | Plymouth Marine Laboratory (PML), University of<br>Exeter Medical School, & University of Plymouth | United Kingdom of Great Britain<br>and Northern Ireland (the) |
| Moore, Marianne             | Frost Professor Emerita in Environmental Science &<br>Professor Emerita of Biological Sciences                                                                                                    | Wellesley College                                                                                  | United States of America (the)                                |
| Moorhouse, Tom              | Post doctoral reseacher in conservation science                                                                                                                                                   | University of Oxford                                                                               | United Kingdom of Great Britain<br>and Northern Ireland (the) |
| Moorman, David              | Assistant Professor                                                                                                                                                                               | University of Massachusetts Amherst                                                                | United States of America (the)                                |
| Mooshammer, Maria           | Postdoctoral Scholar in Ecology/Biogeochemistry                                                                                                                                                   | University of California Berkeley                                                                  | United States of America (the)                                |
| Mopai, Maeleletse           | PhD candidate and Research Assistant; Plant<br>Production                                                                                                                                         | University of Limpopo                                                                              | South Africa                                                  |
| Mora Quiñones, Nidia Gloria | Psicóloga, doctora en la línea de las Ciencias Sociales,<br>perteneciente a los Grupos de Investigación COIDESO<br>y ÁGORA, PSI Departamento de Psicología Social,<br>Evolutiva y de la Educación | Universidad de Huelva                                                                              | Spain                                                         |
| Moradi, Shoeib              | Postdoctoral researcher                                                                                                                                                                           | Paul scherrer institute                                                                            | Switzerland                                                   |
| Moraes, Luiz Roberto Santos | Professor in Environmental Sanitation                                                                                                                                                             | Universidade Federal da Bahia/Federal University of<br>Bahia                                       | Brazil                                                        |
| Morales, Hernan             | Research Fellow                                                                                                                                                                                   | The University of Copenhagen                                                                       | Denmark                                                       |
| MORALES, JAVIER             | PhD Biology                                                                                                                                                                                       | University of Salamanca                                                                            | Spain                                                         |
| MORALES, Javie              | PhD Biology                                                                                                                                                                                       | University of Salamanca                                                                            | Spain                                                         |
| Morales Otero, Marian       | PhD candiate                                                                                                                                                                                      | University of Lausanne                                                                             | Switzerland                                                   |
| Morales-Aguirre, Julia      | Cryoseismologist                                                                                                                                                                                  | Arctic Frontiers                                                                                   | Norway                                                        |
| Morales-Baquero, Rafael     | Professor of Ecology                                                                                                                                                                              | Universidad de Granada                                                                             | Spain                                                         |
| Morales-Barquero, Lucia     | Land Cover and Land Cover Change                                                                                                                                                                  | The University of Queensland                                                                       | Australia                                                     |
| Morales-Castilla, Ignacio   | Postdoctoral Fellow                                                                                                                                                                               | Universidad de Alcalá                                                                              | Spain                                                         |
| Morales-López, Esperanza    | Critical discourse analysis                                                                                                                                                                       | University of A Coruña                                                                             | Spain                                                         |
| Morales-Mulia, Sandra       | Resercher in Neuroscience                                                                                                                                                                         |                                                                                                    | Mexico                                                        |
| Morales-Reyes, Zebensui     | Postdoctoral researcher                                                                                                                                                                           | Miguel Hernández University of Elche                                                               | Spain                                                         |
| Moran, James                | Lecturer in Ecology and Biology                                                                                                                                                                   | Galway Mayo Institute of Technology                                                                | Ireland                                                       |
| Moran, Kate                 | President & CEO and Professor, Faculty of Science                                                                                                                                                 | Ocean Networks Canada, University of Victoria                                                      | Canada                                                        |
| Morand, Serge               | DR CNRS - Health Ecology                                                                                                                                                                          | CNRS - Centre National de la Recherche Scientifique                                                | France                                                        |
| Morando, Mariana            | Senior Researcher/Biology                                                                                                                                                                         | CONICET                                                                                            | Argentina                                                     |
| Morant Etxebarria, Jon      | PhD Student                                                                                                                                                                                       | Aranzadi Sciences Society                                                                          | Spain                                                         |
| Morato, Telmo               | Senior Scientist - Marine Biology                                                                                                                                                                 | IMAR - University Azores                                                                           | Portugal                                                      |
| Morcatty, Thais             | PhD researcher                                                                                                                                                                                    | Oxford Brookes University                                                                          | United Kingdom of Great Britain<br>and Northern Ireland (the) |
| Mordue, Simone              | Research Associate                                                                                                                                                                                | Newcastle University                                                                               | United Kingdom of Great Britain<br>and Northern Ireland (the) |

|                              |                                                               |                                                                  |                                |
|------------------------------|---------------------------------------------------------------|------------------------------------------------------------------|--------------------------------|
| Moreau, Corentin             | Biologist                                                     | INRA                                                             | France                         |
| Moreira, Márcio              | PhD student                                                   | IPMA and CCMAR                                                   | Portugal                       |
| Moreira, Ana Paula B.        | PhD researcher                                                | Universidade Federal do Rio de Janeiro                           | Brazil                         |
| Moreira, Jorge               | Environmental Ethics Researcher                               | Centre for Functional Ecology - Science for People & the Planet” | Portugal                       |
| Moreira, Ana Paula           | PhD researcher                                                | Universidade Federal do Rio de Janeiro - UFRJ                    | Brazil                         |
| Moreira Pessôa, Ana Carolina | PhD Student in Remote Sensing                                 | National Institute for Space Research                            | Brazil                         |
| Moreira-Santos, Matilde      | Researcher                                                    | University of Coimbra                                            | Portugal                       |
| Morel, Loïs                  | Dr in Ecology                                                 |                                                                  | France                         |
| Morel, Jean Louis            | Professor emeritus                                            | Université de Lorraine                                           | France                         |
| Morel-Journel, Thibaut       | Postdoc Fellow                                                | INRA                                                             | France                         |
| Morell Miranda, Pedro        | PhD Student in Human Genetics and Evolution                   | Uppsala University                                               | Sweden                         |
| Morellato, Patricia          | Professor of Botany                                           | UNESP                                                            | Brazil                         |
| Morellet, Nicolas            | Researcher / Ecology                                          | INRA                                                             | France                         |
| Morelli, Chiara              | Postdoc (Neuroscience)                                        |                                                                  | Italy                          |
| Morelli, Toni Lyn            | Research Ecologist                                            | U.S. Geological Survey                                           | United States of America (the) |
| Morency, Catherine           | Professor, Chaire Mobilité                                    | Polytechnique Montreal                                           | Canada                         |
| Moreno, Luis                 | Assistant Professor / Human Geography                         | IGOT/CEG-ULisboa                                                 | Portugal                       |
| Moreno, Karen                | Lecturer and researcher/ Paleontology                         | Universidad Austral de Chile                                     | Chile                          |
| Moreno, Emilio               | PhD                                                           | University of Granada                                            | Spain                          |
| Moreno, Gerardo              | Professor of Soil Science and Biogeochemistry                 | Universidad de Extremadura                                       | Spain                          |
| MORENO, GABRIEL              | Professor at the Interdisciplinary Program in Natural Science | University of Puerto Rico                                        | Puerto Rico                    |
| MORENO, JOSE MANUEL          | PROFESSOR OF ECOLOGY                                          | UNIVERSITY OF CASTILLA-LA MANCHA                                 | Spain                          |
| Moreno Jiménez, Eduardo      | Lecturer in Agricultural Chemistry                            | Universidad Autónoma de Madrid                                   | Spain                          |
| Moreno Lampreave, diego      | Technician Environmental Marine Program/Marine Biologist      | Agencia de Medio Ambiente y Agua, Junta de Andalucía             | Spain                          |
| Moreno Mateos, David         | Ikerbasque Research Fellow                                    | Basque Centre for Climate Change - BC3                           | Spain                          |
| Moreno Rincon, Juan Leonardo | MSc. Meteorology PhD (c) Marine Science                       |                                                                  | Colombia                       |
| Moreno-Casasola, Patricia    | Professor, Coastal ecology                                    | Instituto de Ecología A.C.                                       | Mexico                         |
| Morera-Pujol, Virginia       | PhD student                                                   | University of Barcelona                                          | Spain                          |
| Morère, Lucie                | Post-doctorante / Géographie                                  | Muséum National d’Histoire Naturelle / CESCO                     | France                         |
| Morgan, Edward               | Research Fellow                                               | Griffith University                                              | Australia                      |
| Morgan, Sydney               | Ph.D. Biology                                                 | The University of British Columbia                               | Canada                         |
| Morgan, William              | Professor of Biology                                          | The College of Wooster                                           | United States of America (the) |
| Morgan, Simon                | Conservation Ecologist                                        | Stanford University                                              | United States of America (the) |
| Morgan, Dave                 | Chemist                                                       | Retired                                                          | South Africa                   |
| Morgan, Arthur               | Lecturer (retired)                                            | Rhodes University                                                | South Africa                   |
| Morgan II, Dr. Raymond       | Professor Emeritus                                            | University of Maryland - UMCES                                   | United States of America (the) |
| Morgans, Courtney            | Conservation ecologist                                        | University of Queensland                                         | Australia                      |
| Morganti, Michelangelo       | Post-Doc researcher                                           | University of Milan                                              | Italy                          |

|                           |                                                        |                                                                                      |                                                            |
|---------------------------|--------------------------------------------------------|--------------------------------------------------------------------------------------|------------------------------------------------------------|
| Morgenstern, Olaf         | Principal Scientist, Atmosphere and Climate            |                                                                                      | New Zealand                                                |
| Mori, Emiliano            | Post Doc                                               | University of Siena                                                                  | Italy                                                      |
| Mori, Corinna             | Postdoctoral researcher marine biogeochemistry         | ICBM                                                                                 | Germany                                                    |
| Morice, Vincent           | PhD Candidate in Computer Science                      | VERIMAG UGA CNRS Grenoble INP (Grenoble Institut of Technologie)                     | France                                                     |
| Morien, Evan              | Microbial Ecology                                      | University of British Columbia                                                       | Canada                                                     |
| morin, emmanuelle         | Bioinformatician                                       | French National Institute for Agricultural Research                                  | France                                                     |
| Morin, Soizic             | Researcher - Aquatic microbial ecotoxicology           | INRAE                                                                                | France                                                     |
| Morinay, Jennifer         | Teaching Assistant in Ecology and Evolutionary Biology | University Claude Bernard Lyon 1                                                     | France                                                     |
| Morissette, Lyne          | Marine Conservationist                                 | M - Expertise Marine                                                                 | Canada                                                     |
| Moritz, Roxane            | PhD student in environmental microbiology              | Université de Lausanne                                                               | Switzerland                                                |
| Moritz, Max               | UC Cooperative Extension Wildfire Specialist           | University of California, Santa Barbara                                              | United States of America (the)                             |
| Morley, Craig             | Associate Professor                                    | Toi Ohomai Institute of Technology                                                   | New Zealand                                                |
| MORMUL, ROGER             | Professor Ecology of Inland Water Ecosystems           | State University of Maringá                                                          | Brazil                                                     |
| Moro, Paulo Rogério       | Professor Adjunto                                      | Universidade Estadual de Ponta Grossa - UEPG                                         | Brazil                                                     |
| Moron, Vincent            | Professor of geography (climatology)                   | Aix-Marseille University                                                             | France                                                     |
| Morón Zambrano, Vilisa    | research associate                                     | Universidad Simón Bolívar                                                            | Venezuela (Bolivarian Republic of)                         |
| Morończyk, Joanna         | PhD student                                            | University of Silesia in Katowice, Poland                                            | Poland                                                     |
| Moros, Lina               | PhD Candidate                                          | Institute of Environmental Science and Technology, Universitat Autònoma de Barcelona | Spain                                                      |
| Morosi, Elizabeth         | Paleontología                                          | UdelaR                                                                               | Uruguay                                                    |
| Morre, Dr. Susan          | Instructor (Biology and Ecology)                       | Oregon State University and Linn-Benton Community College                            | United States of America (the)                             |
| MORRI, Carla              | Professor of Ecology                                   | University of Genoa                                                                  | Italy                                                      |
| Morrien, Elly             | Soil ecology researcher                                | University of Amsterdam                                                              | Netherlands (the)                                          |
| Morris, Jeffrey           | Ph.D. Economist                                        | Sound Resource Management Group                                                      | United States of America (the)                             |
| Morris, Aaron             | Electrical engineer; Space Technologist                | Ga. Inst. of Tech. & Fla. Inst. of Tech.                                             | United States of America (the)                             |
| Morrison, Hilary          | Senior Scientist                                       | Marine Biological Laboratory                                                         | United States of America (the)                             |
| Morrison, Thomas          | Principal Engineer                                     | Heritage Standing Inc                                                                | Canada                                                     |
| Morrison III, Archie Todd | Senior Ocean Engineer                                  | Woods Hole Group                                                                     | United States of America (the)                             |
| Morrogh-Bernard, Helen    | Conservation Biologist                                 | University of Exeter                                                                 | United Kingdom of Great Britain and Northern Ireland (the) |
| Morrone, Juan             | Full Professor                                         | UNAM                                                                                 | Mexico                                                     |
| Morse, Andy               | Professor of Climate Impacts                           | University of Liverpool                                                              | United Kingdom of Great Britain and Northern Ireland (the) |
| Morse, John               | Professor Emeritus of Entomology                       | Clemson University                                                                   | United States of America (the)                             |
| Mortara, Renato           | Professor, Parasitology                                | Unifesp                                                                              | Brazil                                                     |
| Mortensen, Nicholas       | Assistant Professor of Exercise Science                | Siena Heights University                                                             | United States of America (the)                             |
| Morton, Phoebe            | Postdoctoral research, Water Quality                   |                                                                                      | United Kingdom of Great Britain and Northern Ireland (the) |
| Morton, Alexandra         | Independent Biologist - salmon                         |                                                                                      | Canada                                                     |

|                            |                                                       |                                                                                   |                                |
|----------------------------|-------------------------------------------------------|-----------------------------------------------------------------------------------|--------------------------------|
| Moscatelli, Maria Cristina | Associate Professor - Soil science                    | University of Tuscia - Viterbo                                                    | Italy                          |
| Moscatello, Marco          | Engineer                                              |                                                                                   | Italy                          |
| Moscoso, Alejandra         | Botanist                                              |                                                                                   | Ecuador                        |
| Moscoso-Sánchez, David     | Profesor Titular de Universidad                       | Universidad Pablo de Olavide                                                      | Spain                          |
| Mosebach, Laura            | PhD Student                                           | Institute of Plant Biology and Biotechnology Münster                              | Germany                        |
| moseby, katherine          | Ecologist, Research Fellow                            | University of New South Wales                                                     | Australia                      |
| Mosello, Rosario           | Associated Researcher                                 | Water Research Institute, Italian National Research Council                       | Italy                          |
| Moser, Gerald              | Senior Scientist in Plant Ecology                     | Plant Ecology, Justus-Liebig-University Giessen                                   | Germany                        |
| Moser, Gleyci              | Assistent Professor- Oceanography                     | UERJ                                                                              | Brazil                         |
| Mosner, Eva                | Senior Scientist                                      | Hochschule Geisenheim University, Department of Applied Ecology                   | Germany                        |
| Mosquera, Giovanni         | Doctoral researcher                                   | Universidad de Cuenca                                                             | Ecuador                        |
| Moss, Sarah                | Scientist, Plant Molecular Biology                    | Plant and Food Research Ltd                                                       | New Zealand                    |
| Moss, Alden                | Bioengineering Researcher                             | University of California, Berkeley                                                | United States of America (the) |
| Moss, Alan                 | PhD Candidate - Pollination Ecologist - Himalayas     | Saint Louis University                                                            | United States of America (the) |
| Mossbrucker, Magdalena     | Research Assistant for a shark ecology project        | Charled Darwin Foundation                                                         | Ecuador                        |
| Mossion, Vinciane          | PhD student                                           | University of Neuchâtel                                                           | Switzerland                    |
| Mostaço-Guidolin, Leila    | Postdoctoral Fellow / Biomedical Engineering          | University of British Columbia                                                    | Canada                         |
| Mostaço-Guidolin, Luiz C.  | Assistant Professor, Computational Epidemiology       | University of Manitoba                                                            | Canada                         |
| Mostafavi, Ehsan           | Lecturer/ Research Engineer                           | uOttawa/NRCan                                                                     | Canada                         |
| Mota, Luísa                | PhD student, Ecology                                  | University of Campinas                                                            | Brazil                         |
| Motiwala, Zenia            | PhD, Structural Biology                               | CSIR-National Chemical Laboratory                                                 | India                          |
| Mott, Rowan                | Research Fellow, Ecology                              | The University of Melbourne                                                       | Australia                      |
| Motta Maues, Marcia        | Researcher                                            | Embrapa Eastern Amazon                                                            | Brazil                         |
| Motta Maués, Marcia        | Researcher - Pollination biologist                    | Embrapa Eastern Amazon                                                            | Brazil                         |
| Mouchet, Florence          | Ecotoxicology research                                | CNRS                                                                              | France                         |
| Moulia, Catherine          | Professor- Parasitism-Epidemiology- Ecology-Evolution | Montpellier University                                                            | France                         |
| Moullec, Fabien            | Research associate                                    | Hamburg University                                                                | Germany                        |
| Moulton, Timothy           | Professor                                             | Department of Ecology, State University of Rio de Janeiro                         | Brazil                         |
| Mouquet-Rivier, Claire     | Senior Researcher in Nutrition                        | French Research Institute for sustainable development                             | France                         |
| Moura, Alexandra           |                                                       | Institut Pasteur                                                                  | France                         |
| Moura, Claudio             | Scientific Researcher, Biologist, Master of Science   | Forest Institute / Secretary of Infrastructure and Environment of São Paulo State | Brazil                         |
| Moura, Catarina            | Researcher (Ecology)                                  | Universidade de Coimbra                                                           | Portugal                       |
| Moura Costa, Pedro         | Director                                              | Instituto BVRio                                                                   | Brazil                         |
| Mourão, Guilherme          | Researcher/Ecology                                    | Embrapa Pantanal                                                                  | Brazil                         |
| Mourey, Lionel             | Research director                                     | CNRS                                                                              | France                         |
| Mourier, Tobias            | Research Scientist                                    | KAUST                                                                             | Saudi Arabia                   |
| Mourier, Johann            | Ecology                                               | IRD                                                                               | France                         |

|                                  |                                                    |                                                                          |                                                            |
|----------------------------------|----------------------------------------------------|--------------------------------------------------------------------------|------------------------------------------------------------|
| Mousis, Olivier                  | Professor of Astrophysics and Planetary Science    | Aix-Marseille Université                                                 | France                                                     |
| Mousseau, Laure                  | Assistant professor                                | Sorbonne Université                                                      | France                                                     |
| Mousseau, Timothy                | Professor of Biological Sciences                   | University of South Carolina                                             | United States of America (the)                             |
| MOUTIER, Maryline                | Soil scientist                                     | Ram-Ses (Risk AssessMent - Soil Expert advices and Services)             | Belgium                                                    |
| Moutin, Thierry                  | Professor                                          | Aix Marseille University                                                 | France                                                     |
| Moutinho, Paulo                  | Senior Scientist                                   | Amazon Environmental Research Institute - IPAM                           | Brazil                                                     |
| Moutou, Claire                   | Senior Researcher in Astrophysics                  | CNRS                                                                     | France                                                     |
| Mow, June Marie                  | Regional Planner and Biologist                     | Fundacion Providence                                                     | Colombia                                                   |
| Mowbray, Sherry                  | professor                                          | Department of Cell and Molecular Biology, Uppsala University             | Sweden                                                     |
| Mowo, Jeremias Gasper            | Senior Advisor / Soil Scientist                    | World Agroforestry (ICRAF)                                               | Tanzania, United Republic of                               |
| Moya, Wladimir                   | Doctoral student                                   | Universidad de Los Lagos                                                 | Ecuador                                                    |
| Moya-Laraño, Jordi               | Tenure scientist                                   | Estación Experimental de Zonas Áridas - CSIC                             | Spain                                                      |
| Moyano, Marta                    | Marine ecologist                                   | University of Hamburg                                                    | Germany                                                    |
| Moyer, Ellen                     | Principal                                          | Greenenvironment, LLC                                                    | United States of America (the)                             |
| Moyle, Peter                     | Distinguished Professor Rmeritus, Fish Biology     | University of California, Davis                                          | United States of America (the)                             |
| Moyses, Murdo                    | Chemistry                                          | Durham University                                                        | United Kingdom of Great Britain and Northern Ireland (the) |
| Mrisha, Chediel                  | Climate change adaptation officer                  | Tanzania Wildlife Research Institute                                     | Tanzania, United Republic of                               |
| Mrotzek, Almut                   | PostDoc                                            | Greifswald Mire Centre, University of Greifswald                         | Germany                                                    |
| Mrowka, Rob                      | Senior Scientist Emeritus                          | Center for Biological Diversity                                          | United States of America (the)                             |
| Mrugala, Agata                   | Postdoctoral researcher in Ecology                 | Leibniz-Institute of Freshwater Ecology and Inland Fisheries             | Germany                                                    |
| Msellati, Philippe               | Emeritous research director in epidemiology        | Institut de Recherche pour le Développement                              | France                                                     |
| Muanis, Manoel                   | Pós Doc, Principal Investigator                    | UFRJ                                                                     | Brazil                                                     |
| Mubarrok, Saat                   | Lecturer                                           | Mulawarman University                                                    | Indonesia                                                  |
| MUCHIRI, MUGURE                  | AGRICULTURAL ECONOMICS                             |                                                                          | Kenya                                                      |
| Mucia, Anthony                   | PhD Researcher, Meteorology/Land Surface Modelling | CNRM Météo-France, CNRS                                                  | France                                                     |
| Mueller, Melinda                 | Science Faculty (Biology)                          | Seattle Academy                                                          | United States of America (the)                             |
| Mueller, Ralf C.                 | PhD student                                        | Max Planck Institute of Animal Behaviour                                 | Germany                                                    |
| Mueller, William                 | Ornithologist - Retired                            | Western Great Lakes Bird and Bat Observatory, Inc.                       | United States of America (the)                             |
| Mueller-Schwefe, Dr. med. Thomas | Medical Doctor                                     |                                                                          | Germany                                                    |
| Mugnier, Jean Louis              | Rechearcher earth Sciences                         | CNRS                                                                     | France                                                     |
| Muhammad Ashraf, Tauseef         | Environmental sciences                             |                                                                          | Pakistan                                                   |
| Muhlmann, Susana                 | Arquitecta Docente Investigadora                   | Facultad de Arquitectura Diseño y Urbanismo, Universidad de Buenos Aires | Argentina                                                  |
| Muir, Tom                        | Geoscientist (retired)                             | (Ontario Geological Survey)                                              | Canada                                                     |
| Muir, Barry                      | Adjunct Associate Professor of Ecology             | Retired                                                                  | Australia                                                  |
| Muir, Rebecca                    | PhD Student in Psychiatry                          | University College London                                                | United Kingdom of Great Britain and Northern Ireland (the) |
| Mukhopadhyay, Sudarshana         | PhD candidate, hydroclimatology                    | North Carolina State University                                          | United States of America (the)                             |

|                            |                                                                     |                                                                                                                                          |                                                               |
|----------------------------|---------------------------------------------------------------------|------------------------------------------------------------------------------------------------------------------------------------------|---------------------------------------------------------------|
| Muktupavela, Rasa          | PhD in Population Genetics                                          | University of Copenhagen                                                                                                                 | Denmark                                                       |
| Mukul, Sharif Ahmed        | Research Fellow                                                     | University of the Sunshine Coast                                                                                                         | Australia                                                     |
| Mukul, Sharif              | Senior Resaerch Fellow                                              | Tropical Forests and People Research Centre,<br>University of the Sunshine Coast                                                         | Australia                                                     |
| Mulatier, Margaux          | Postdoc in chemical ecology of insects                              | Institut Pasteur de la Guadeloupe                                                                                                        | France                                                        |
| Mulder, Christa            | Professor of Ecology                                                | University of Alaska Fairbanks                                                                                                           | United States of America (the)                                |
| Mulero, Stephen            | PhD student                                                         | University of Perpignan                                                                                                                  | France                                                        |
| Mulhouse, John             | Botanist                                                            |                                                                                                                                          | United States of America (the)                                |
| Mulkey, Stephen            | Lecturer University of Florida, President emeritus<br>Unity College | University of Florida                                                                                                                    | United States of America (the)                                |
| Mulla, Aziz                | PhD Coral Reef Ecology                                              | Academia Sinica                                                                                                                          | Taiwan                                                        |
| Muller, Rebecca            | Junior researcher Savanna Ecology                                   | University of Cape Town                                                                                                                  | South Africa                                                  |
| Muller, Richard            | Computer Science                                                    |                                                                                                                                          | New Zealand                                                   |
| Muller, Stevell            | PhD Student / Research Assistant in Mathematics                     | Universität des Saarlandes                                                                                                               | Germany                                                       |
| Müller, Antoine            | CEO, Dr. In Physics                                                 | Alpes Lasers SA                                                                                                                          | Switzerland                                                   |
| Müller, Georg              | Master's student                                                    | Universidade Federal do Rio de Janeiro                                                                                                   | Brazil                                                        |
| Müller, Matthias           | Staff Scientist                                                     |                                                                                                                                          | Germany                                                       |
| Müller, Gerd B.            | Professor Emeritus, Biology                                         | University of Vienna                                                                                                                     | Austria                                                       |
| Müller, Ulrich             | Professor                                                           | PH Ludwigsburg, University of Education                                                                                                  | Germany                                                       |
| Müller, Steffen            | Assistant professor of mathematics                                  | University of Groningen                                                                                                                  | Netherlands (the)                                             |
| Müller, Marc               | Vertr.-Prof. für Sachunterricht und seine Didaktik                  | Universität Greifswald                                                                                                                   | Germany                                                       |
| Müller, Andreas            | Principal Investigator in Immunology                                | Otto-von-Guericke-University Magdeburg                                                                                                   | Germany                                                       |
| Müller, Daniel             | Agricultural Sciences                                               | Leibniz Institute of Agricultural Development in<br>Transition Economies (IAMO)                                                          | Germany                                                       |
| Müller, Martin             | Geophysics PhD, Researcher                                          | formerly Technische Universität Berlin                                                                                                   | Germany                                                       |
| Müller, Andreas            | CEO / Chemistry                                                     | chromgruen Planungs- und Beratungs- GmbH & Co.<br>KG                                                                                     | Germany                                                       |
| Müller, Birgit             | Senior Scientist                                                    | Helmholtz Centre for Environmental Research - UFZ                                                                                        | Germany                                                       |
| Müller-Klein, Nadine       | Post Doc in Evolutionary Ecology                                    | Ulm University                                                                                                                           | Germany                                                       |
| Mulligan, Vikram           | Research Scientist (Biochemistry)                                   | Center for Computational Biology, Flatiron Institute                                                                                     | United States of America (the)                                |
| Mullins, Paul              | Reader, Psychology                                                  | Bangor University                                                                                                                        | United Kingdom of Great Britain<br>and Northern Ireland (the) |
| Multon, Bernard            | Electrical Engineering                                              | ENS Rennes                                                                                                                               | France                                                        |
| Mulungula Pascal, Masilya  | Teacher ans Researcher                                              | Hydrobiological Researcher Centre (CRH) and Unité<br>d'enseignement et de Recherche en Hydrobiologie<br>Appliquée (UERHA)                | Congo (the Democratic Republic of<br>the)                     |
| MULUNGULA PASCAL, MASILYA  | Professor/Researcher                                                | Hydrobiological Research Centre (CRH)-Uvira<br>and Unité d'Enseignement et de Recherche en<br>Hydrobiologie Appliquée (UERHA)/ISP-Bukavu | Congo (the Democratic Republic of<br>the)                     |
| Muncke, Jane               | Managing Director                                                   | Food Packaging Forum Foundation                                                                                                          | Switzerland                                                   |
| Mundalamo, Fhatuwani James | Physics and Physics Education                                       | Tshitavha Sambandou Village                                                                                                              | South Africa                                                  |
| Mundhenk, Niklas           | Senior Research Associate                                           | Lawrence Berkeley National Lab                                                                                                           | United States of America (the)                                |

|                             |                                                                                             |                                                                                        |                                                            |
|-----------------------------|---------------------------------------------------------------------------------------------|----------------------------------------------------------------------------------------|------------------------------------------------------------|
| Mundkur, Taej               | Senior Technical Officer                                                                    | Wetlands International                                                                 | Netherlands (the)                                          |
| Munguira, Miguel L.         | Professor Zoology                                                                           | Universidad Autónoma de Madrid                                                         | Spain                                                      |
| Muniz Tagliari, Mario       | PhD student                                                                                 | Federal University of Santa Catarina                                                   | Brazil                                                     |
| Münkemüller, Tamara         | scientist                                                                                   | CNRS                                                                                   | France                                                     |
| Munoz, Joaquin              | Postdoctoral Researcher                                                                     | UIRCP, University of Córdoba                                                           | Spain                                                      |
| Munoz, Isabel               | Professor                                                                                   | University of Barcelona                                                                | Spain                                                      |
| Munoz, Carlos               | Researcher, Marine Sciences                                                                 | Fundacion Ecomares                                                                     | Colombia                                                   |
| Munoz, François             | Professor in Ecology and Biogeography                                                       | Université Grenoble-Alpes                                                              | France                                                     |
| Muñoz, Gabriel              | Phd student community ecology and evolution                                                 | Concordia University Montreal                                                          | Canada                                                     |
| Muñoz, Pao                  | Grad Student Environmental Studies                                                          | Ohio University's Voinovich School of Leadership and Public Affairs                    | Costa Rica                                                 |
| Muñoz Muñoz, María          | PhD. in Marine Spatial Planning / Member of the Mediterranean Climate Change Research Group | Spanish Oceanographic Institute                                                        | Spain                                                      |
| Muñoz-Abril, Laia           | Biologist                                                                                   | Universidad San Francisco de Quito                                                     | Ecuador                                                    |
| Muñoz-Nolasco, Francisco J. | Biologist - MSc student in Ecology                                                          | Universidad Nacional Autónoma de México                                                | Mexico                                                     |
| Muñoz-Sáez, Andrés          | Agroecology and Sustainability                                                              | Center of Applied Ecology and Sustainability (CAPES).<br>Universidad Católica de Chile | Chile                                                      |
| Munoz-Torres, Zeidy         | Neuroscientist                                                                              | UNAM                                                                                   | Mexico                                                     |
| Munson, Alison              | Professor of Forest ecology, PhD                                                            | Université Laval                                                                       | Canada                                                     |
| Münster, Marie              | Professor                                                                                   | Technical University of Denmark                                                        | Denmark                                                    |
| Munzinger, Jérôme           | Researcher, tropical botany                                                                 | IRD                                                                                    | France                                                     |
| Münzner, Karla              | PhD-student, Limnology                                                                      | Uppsala University                                                                     | Sweden                                                     |
| Muradian, Melissa L         | Water Quality Data Analysis                                                                 |                                                                                        | United States of America (the)                             |
| Murall, Carmen Lia          | Infectious disease ecologist                                                                | University of Montreal                                                                 | Canada                                                     |
| Murcia, Juan                | Marine biologist                                                                            |                                                                                        | Puerto Rico                                                |
| Murcott, Susan              | Lecturer                                                                                    | MIT D-Lab                                                                              | United States of America (the)                             |
| Murillo Corrales, Tatiana   | PhD researcher                                                                              | German Primate Center                                                                  | Germany                                                    |
| Murphy, Rosanna             | geology                                                                                     | University of New England                                                              | Australia                                                  |
| Murphy, Thomas              | Laboratory Manager                                                                          | Oregon State University                                                                | United States of America (the)                             |
| Murphy, Kieran              | Marine Ecology PhD Student                                                                  | Institute for Marine and Antarctic Studies                                             | Australia                                                  |
| Murphy, Dennis              | Conservation Biologist                                                                      | University of Nevada, Reno                                                             | United States of America (the)                             |
| Murphy, Michael             | Professor of Astrophysics                                                                   | Swinburne University of Technology                                                     | Australia                                                  |
| Murray, Jon                 | Senior Research Associate                                                                   | Lancaster University                                                                   | United Kingdom of Great Britain and Northern Ireland (the) |
| Murray, Tomas               | Ecologist                                                                                   | National Biodiversity Data Centre                                                      | Ireland                                                    |
| Murray, K. Greg             | Professor of Biology (Ecology)                                                              | Hope College                                                                           | United States of America (the)                             |
| Murray, Kent                | Professor of Geological Sciences                                                            | University of Michigan                                                                 | United States of America (the)                             |
| MURRAY, Hugues              | Professor (Emeritus)                                                                        | Normandy University                                                                    | France                                                     |
| Murray-Rust, Peter          | Reader Emeritus                                                                             | University of Cambridge                                                                | United Kingdom of Great Britain and Northern Ireland (the) |
| Murrell, Zack               | Professor                                                                                   | Appalachian State University                                                           | United States of America (the)                             |
| Murrell, Paul               | Associate Professor                                                                         | The University of Auckland                                                             | New Zealand                                                |

|                           |                                                           |                                                                                   |                                                            |
|---------------------------|-----------------------------------------------------------|-----------------------------------------------------------------------------------|------------------------------------------------------------|
| Murrell, Michael          | Research Ecologist                                        | US Environmental Protection Agency (retired)                                      | United States of America (the)                             |
| Murry, Dr Nick            | Lecturer, Environmental Management                        | Bath Spa University                                                               | United Kingdom of Great Britain and Northern Ireland (the) |
| murthy, nss               | Electrical engineering                                    | IIT KANPUR                                                                        | India                                                      |
| Murugesan, San            | Professor                                                 | BRITE Professional Services                                                       | Australia                                                  |
| Muschler, Reinhold        | Latin-American Chair of Agroecology and Agrobiodiversity  | CATIE (Centro Agronómico Tropical de Investigación y Enseñanza)                   | Costa Rica                                                 |
| Mushinsky, Henry          | Professor Emeritus                                        | University of South Florida                                                       | United States of America (the)                             |
| Musielak, Dora            | Research Position                                         | University of Texas                                                               | United States of America (the)                             |
| Musil, Charles            | Senior Specialist Scientist (Retired)                     | South African National Biodiversity Institute                                     | South Africa                                               |
| Musila, Simon             | Research Biologist                                        | National Museums of Kenya                                                         | Kenya                                                      |
| Musiolek, Lea             | PhD student in cognitive neuroscience                     | Humboldt Universität Berlin                                                       | Germany                                                    |
| Muszevska, Anna           | Assistant Professor/ Biology                              | Institute of Biochemistry and Biophysics, Polish Academy of Sciences              | Poland                                                     |
| Muth, Allan               | Director Emeritus Boyd Deep Canyon Desert Research Center | University of California, Riverside                                               | United States of America (the)                             |
| Mutz, Michael             | Professor / Stream Ecology                                | Brandenburg University of Technology Cottbus - Senftenberg                        | Germany                                                    |
| Mutzel, Ariane            | Postdoctoral Scholar                                      | University of Kentucky                                                            | United States of America (the)                             |
| Muylaert, Renata de Lara  | PhD student                                               | UNESP São Paulo State University                                                  | Brazil                                                     |
| Muys, Bart                | Full Professor of Forest Ecology & Management             | KU Leuven                                                                         | Belgium                                                    |
| Muzaffar, Sabir           | Professor of Ecology                                      | United Arab Emirates University                                                   | United Arab Emirates (the)                                 |
| Mwamhanga, John           | Faculty                                                   | School for Field Studies                                                          | Tanzania, United Republic of                               |
| Mwampamba, Tuyeni H       | Research Professor                                        | National Autonomous University of Mexico                                          | Mexico                                                     |
| Mwangi, Evans             | Conservation Biologist (wildlife/ecosystems)              | University of Nairobi                                                             | Kenya                                                      |
| MWIZERWA, INNOCENT TAYARI | ENVIRONMENTAL SCIENCE AND ENGINEERING                     | MWIZE AND LEINE COMPANY LTD                                                       | Uganda                                                     |
| Myatt, Gerald             | Reader in Physics (Retired)                               | Oxford University                                                                 | United Kingdom of Great Britain and Northern Ireland (the) |
| Mycroft, Abby             | PhD candidate Environmental Science                       | University of York                                                                | United Kingdom of Great Britain and Northern Ireland (the) |
| Myers, Shona              | Principal Ecologist                                       | Myers Ecology Ltd                                                                 | New Zealand                                                |
| Myers, Krista             | Geology and Geophysics                                    | Louisiana State University                                                        | United States of America (the)                             |
| Myers, Philip             | Professor Emeritus                                        | University of Michigan                                                            | United States of America (the)                             |
| Myhren, Jonn Are          | Associate professor head of building technology           | Dalarna university                                                                | Sweden                                                     |
| Mynott, Sara              |                                                           | University of Exeter                                                              | United Kingdom of Great Britain and Northern Ireland (the) |
| Mysłajek, Robert W.       | Assistant Professor                                       | University of Warsaw, Faculty of Biology, Institute of Genetics and Biotechnology | Poland                                                     |
| Myssior, Sergio           | Architecture and Urban Planning                           | MYR                                                                               | Brazil                                                     |
| Mzumara-Gawa, Tiwonge     | Lecturer in Ecology                                       | Malawi University of Science and Technology                                       | Malawi                                                     |
| N., Sivasothi             | Senior Lecturer, Biological Sciences                      | Department of Biological Sciences, National University of Singapore               | Singapore                                                  |



|                               |                                                               |                                                                                     |                                                            |
|-------------------------------|---------------------------------------------------------------|-------------------------------------------------------------------------------------|------------------------------------------------------------|
| Nabielek, Heinz               | Physicist in Energy Research                                  | Forschungszentrum Jülich (Germany), retired                                         | Austria                                                    |
| Nachón García, David José     | Post doc researcher within the project DiadES - Ichthyologist | Universidade de Compostela (USC) - Estación de Hidrobiología "Encoro do Con" (EHEC) | Spain                                                      |
| Nachtigall Maurício, Giovanni | University Professor / zoology and environmental education    | Universidade Federal de Pelotas (Federal University of Pelotas)                     | Brazil                                                     |
| Naciri, Yamama                | Head curator                                                  | Conservatoire & Jardin botaniques de Genève                                         | Switzerland                                                |
| Nackley, Selina               | Biologist                                                     | McGill University                                                                   | Canada                                                     |
| Nadeem, Soha                  | Engineer                                                      | University of Connecticut                                                           | United States of America (the)                             |
| Nadelhoffer, Knute            | Professor, Dept. of Ecology & Evolutionary Biology            | University of Michigan                                                              | United States of America (the)                             |
| Nado, Ladislav                | Behavioral Ecologist                                          | Institute of Forest Ecology, Slovak Academy of Sciences                             | Slovakia                                                   |
| nagalakshmi, r                | associate professor                                           | SRM IST KTR                                                                         | India                                                      |
| Nagamachi, Cleusa Yoshiko     | Full Professor - Genetics                                     | Universidade Federal do Pará                                                        | Brazil                                                     |
| Nagel, Thomas A.              | Forest ecologist                                              | University of Ljubljana                                                             | Slovenia                                                   |
| Nagel, Lisa                   | Research assistant/ PhD candidate                             | University Bremen                                                                   | Germany                                                    |
| nagels, luc                   | emeritus professor Chemistry                                  | University Antwerpen                                                                | Belgium                                                    |
| Nagels, Luc                   | emeritus professor Chemistry                                  | Antwerp University                                                                  | Belgium                                                    |
| Naggay, Benjamin              | PhD Student                                                   | Reutlingen University                                                               | Germany                                                    |
| Naggs, Fred                   | Scientific Associate, Biodiversity & Conservation             | The Natural History Museum, London                                                  | United Kingdom of Great Britain and Northern Ireland (the) |
| Naglik, Carole                | Environmental Geologist / Dr. Sc. Nat. Palaeontology          |                                                                                     | Switzerland                                                |
| Nagy, Laszlo                  | Scientific Advisor                                            | Hungarian Academy of Sciences                                                       | Hungary                                                    |
| Nagy, Zoltán Tamás            | biologist                                                     |                                                                                     | Germany                                                    |
| Nagy, Martina                 | PostDoc Biology                                               | Museum für Naturkunde, Berlin                                                       | Germany                                                    |
| Nahon, Peter                  | Researcher                                                    | University of Neuchâtel                                                             | Switzerland                                                |
| Naia, Marisa                  | MSc student                                                   | Faculty of Sciences, Porto                                                          | Portugal                                                   |
| Naik, Hiral                   | Scientist/Conservationist                                     |                                                                                     | South Africa                                               |
| Naik, Hemal                   | PhD Student                                                   | Max Planck Institute of Animal Behavior                                             | Germany                                                    |
| Nair, Remya                   | Post-Doctoral fellow                                          | Montana State University                                                            | United States of America (the)                             |
| Nair, Tarun                   | Researcher, Conservation Biology                              |                                                                                     | India                                                      |
| Nakayama, Cristina Rossi      | Assistant professor / Environmental Science                   | Federal university of Sao Paulo                                                     | Brazil                                                     |
| Nakoneczny, Mirosław          | Assoc. Prof.                                                  | University of Silesia; Dept. of Animal Physiology and Ecotoxicology                 | Poland                                                     |
| Nanni, Analia                 | Posdoctoral fellow CONICET and chief of practical work        | Instituto de Investigación e Ingeniería Ambiental IIIA(CONICET-UNSAM)               | Argentina                                                  |
| Nanni, Ana Sofia              | Postdoctoral Researcher                                       | Instituto de Ecología Regional (UNT/CONICET)                                        | Argentina                                                  |
| Nanninga, Gerrit              | Postdoctoral Fellow                                           | University of Cambridge                                                             | United Kingdom of Great Britain and Northern Ireland (the) |
| Nannini, Francesco            | PhD student in cancer immunotherapy                           | UCL Cancer Institute                                                                | United Kingdom of Great Britain and Northern Ireland (the) |
| Napolitano, Laura             | Economist                                                     | London School of Economics                                                          | Italy                                                      |
| Napoly, Adrien                | Research Engineer                                             | Météo-France / CNRM                                                                 | France                                                     |

|                                |                                                         |                                                                                                        |                                |
|--------------------------------|---------------------------------------------------------|--------------------------------------------------------------------------------------------------------|--------------------------------|
| Napton, Darrell                | Professor of Geography                                  | South Dakota State University                                                                          | United States of America (the) |
| Narayanappa, DEVARAJU          | Research Scientist                                      | IPSL/LSCE (Laboratoire des Sciences du Climat et de l'Environnement)                                   | France                         |
| Narducci, Rachel               | Vertebrate Paleontology                                 | Florida Museum of Natural History                                                                      | United States of America (the) |
| Narvaez, Diego                 | Assistant Professor                                     | Universidad de Concepción                                                                              | Chile                          |
| Nascimento, Marcelo            | Associate Professor /Plant Ecology                      | Universidade Estadual do Norte Fluminense Darcy Ribeiro (UENF)                                         | Brazil                         |
| Nascimento, Victor             | Professor                                               | UFRGS                                                                                                  | Brazil                         |
| Nascimento Lemos, Leandro      | PhD candidate                                           | University of São Paulo (USP)                                                                          | Brazil                         |
| Naselli-Flores, Luigi          | Associate Professor of Environmental and Applied Botany | University of Palermo                                                                                  | Italy                          |
| Nash, Barbara                  | Professor Emeritus Geology and Geophysics               | University of Utah                                                                                     | United States of America (the) |
| Nasi, Robert                   |                                                         | CIFOR                                                                                                  | Indonesia                      |
| Nasmith, William               | Professor of Climatology                                | University of Windsor                                                                                  | Canada                         |
| NASR, Alexis                   | university professor                                    | Aix Marseille University - France                                                                      | France                         |
| Nass Kovacs, Gabriela          | Postdoc                                                 | Max Planck Institute for medical Research, Heidelberg                                                  | Germany                        |
| Natarajan, Lakshminarayanan    | Project scientist                                       | Wildlife Institute of India                                                                            | India                          |
| Nathan, Lisa                   | Associate Professor                                     | University of British Columbia                                                                         | Canada                         |
| Nathan MD, Martha              | Family Physician                                        | Baystate Brightwood Community Health Center                                                            | United States of America (the) |
| Nätscher, Paulina              | PhD student in Palaeobiology                            | Friedrich-Alexander University Erlangen-Nürnberg                                                       | Germany                        |
| Natskoulis, Pantelis           | Researcher / Enology                                    | Institute of Technology of Agricultural Products / Hellenic Agricultural Organisation (ELGO) - DIMITRA | Greece                         |
| Nattabi, Juliet                | Teacher                                                 | Makerere University                                                                                    | Uganda                         |
| Nau, Darius                    | Paleontology                                            | University of Bonn                                                                                     | Germany                        |
| Nau, Patrick                   | Combustion Scientist                                    | German Aerospace Center (DLR)                                                                          | Germany                        |
| Naud, Marie-Eve                | Scientific and EPO coordinator, astronomy               | Université de Montréal                                                                                 | Canada                         |
| Nauen, Cornelia E.             | Marine Scientist, President                             | Mundus maris - Sciences and Arts for Sustainability asbl                                               | Belgium                        |
| Naumann, Andreas               | Physicist                                               | Fraunhofer Institute for Photonic Microsystems                                                         | Germany                        |
| Navarro, Francisco             | Professor of Applied Mathematics                        | Universidad Politécnica de Madrid                                                                      | Spain                          |
| Navarro, Rene                  | PhD (Zoology)                                           | FitzPatrick Institute of African Ornithology, University of Cape Town                                  | South Africa                   |
| Navarro, Miguel                | Genomic Sciences student                                | Universidad Nacional Autónoma de México                                                                | Mexico                         |
| Navarro, Joan                  | Researcher                                              | Instituto de Ciencias del Mar CSIC                                                                     | Spain                          |
| Navarro, Nuria                 | Professor                                               | Universidad Rey Juan Carlos                                                                            | Spain                          |
| Navarro, Luis                  | Professor of Biology                                    | University of Vigo                                                                                     | Spain                          |
| Navarro Correa, Micaela Andrea | Plant Science PhD student                               | National Centre for Biotechnology (CNB-CSIC)                                                           | Spain                          |
| Navarro Llorens, Juana Maria   | Associate professor                                     | Universidad Complutense de madrid                                                                      | Spain                          |
| Navarro Reyes, Francisco Bruno | Permanent researcher                                    | IFAPA (Andalusian Government)                                                                          | Spain                          |
| Navarro-León, Eloy             | PhD Student in Biology                                  | University of Granada                                                                                  | Spain                          |
| Navas, Marie-Laure             | Ecology                                                 | Montpellier SupAgro                                                                                    | France                         |
| Navascués, Miguel              | Researcher                                              | INRA                                                                                                   | France                         |

|                                      |                                                                       |                                                                         |                                                               |
|--------------------------------------|-----------------------------------------------------------------------|-------------------------------------------------------------------------|---------------------------------------------------------------|
| Navedo, Juan                         | Professor                                                             | Universidad Austral de Chile                                            | Chile                                                         |
| Naya, Hugo                           | Head of Bioinformatics / Associate Professor<br>Quantitative Genetics | Institut Pasteur de Montevideo / Facultad de<br>Agronomía - UDELAR      | Uruguay                                                       |
| Nayak, Ayushi                        | Archaeological Scientist                                              | Max Planck Institute for the Science of Human History                   | Germany                                                       |
| Nayak, Aditya                        | Molecular plant sciences.                                             | ETH Zürich                                                              | India                                                         |
| Nazhah, Maad                         | Resercher                                                             | Museum für Naturkunde                                                   | Germany                                                       |
| Nazmi, Aydin                         | Epidemiology                                                          | California Polytechnic State University San Luis<br>Obispo              | United States of America (the)                                |
| Neal, Jodi                           | Horticultural science                                                 | Department of Agriculture and Fisheries                                 | Australia                                                     |
| Nečada, Marek                        | Nano-optics                                                           | Aalto University                                                        | Finland                                                       |
| Necsulea, Anamaria                   | Researcher                                                            | CNRS                                                                    | France                                                        |
| Nedelec, Sophie                      | Postdoctoral researcher, Marine biosciences                           | University of Exeter                                                    | United Kingdom of Great Britain<br>and Northern Ireland (the) |
| Neelamraju, Cath                     | Water Quality Scientist                                               | State government Department of Environment and<br>Science               | Australia                                                     |
| Neff, Roni                           | Associate Professor, Environmental Health                             | Johns Hopkins Bloomberg School of Public Health                         | United States of America (the)                                |
| Negro Balmaseda, Juan José           | Researcher                                                            | CSIC                                                                    | Spain                                                         |
| Neichel, Benoit                      | Scientist                                                             | Laboratoire Astrophysique de Marseille                                  | France                                                        |
| Neidhardt, Harald                    | Biogeochemistry                                                       | Tübingen University                                                     | Germany                                                       |
| Neier, Thomas                        |                                                                       | WU Wien                                                                 | Austria                                                       |
| Neill, Richard                       | College Lecturer in Physics                                           | Magdalene College, Cambridge                                            | United Kingdom of Great Britain<br>and Northern Ireland (the) |
| Neilson, Roy                         | Soil Ecologist                                                        | The James Hutton Institute                                              | United Kingdom of Great Britain<br>and Northern Ireland (the) |
| Neilson, Ronald                      | Research Professor (adjunct, retired)                                 | Oregon State University                                                 | United States of America (the)                                |
| Neinaka, Valentina                   | Environmental Scientist                                               | Private                                                                 | Papua New Guinea                                              |
| Neldner, Karri                       | PhD student                                                           | University of Queensland                                                | Australia                                                     |
| Neldner, Sina                        | Research / PhD Student                                                | Universität Bielefeld                                                   | Germany                                                       |
| Nelles, Johannes                     | Doctoral Researcher                                                   | Helmholtz Centre for Environmental Research                             | Germany                                                       |
| nelson, matthew                      | lecturer, biology                                                     | university of british columbia                                          | Canada                                                        |
| Nelson, Kirk                         | Former postdoctoral scholar, Civil & Environmental<br>Engineering     | UC Davis                                                                | United States of America (the)                                |
| Nelson, Michael Paul                 | Professor                                                             | Oregon State University                                                 | United States of America (the)                                |
| Nelson, Charlotte                    | PhD candidate                                                         | University of British Columbia                                          | Canada                                                        |
| Nelson, Cara                         | Professor of Restoration Ecology                                      | University of Montana                                                   | United States of America (the)                                |
| Nelson Teixeira Borges Júnior, Vitor | Researcher / Ecology                                                  | Universidade Federal do Rio de Janeiro                                  | Brazil                                                        |
| NEMERY, Julien                       | Associate professor                                                   | Université Grenoble Alpes/Grenoble-INP                                  | France                                                        |
| Nemoz, Benjamin                      | MD Virology                                                           | Université Grenoble Alpes                                               | France                                                        |
| Nepèi, Massimo                       | Associate Professor, Botany                                           | University of Siena                                                     | Italy                                                         |
| Nepote, Ana C.                       | PhD Candidate in Sustainability Sciences                              | Universidad Nacional Autonoma de Mexico                                 | Mexico                                                        |
| Neser, Stefan                        | Professor, Entomology                                                 | Forestry and Agricultural Biotechnology Institute,<br>Univ. of Pretoria | South Africa                                                  |

|                       |                                                          |                                                                                                                         |                                                            |
|-----------------------|----------------------------------------------------------|-------------------------------------------------------------------------------------------------------------------------|------------------------------------------------------------|
| Neser, Otilie         | Entomologist (Retired)                                   | Agricultural Research Institute, Biosystematics Division (retired)                                                      | South Africa                                               |
| Ness, Bryan           | Professor of Biology                                     | Pacific Union College                                                                                                   | United States of America (the)                             |
| Nest, Frank           | Professor for International Management                   | HTWG Konstanz                                                                                                           | Germany                                                    |
| NESTAL GÓMEZ, Enrique | Chemical Engineer                                        | none                                                                                                                    | Spain                                                      |
| Nettelblad, Carl      | Associate Professor                                      | Division of Scientific Computing, Science for Life Laboratory, Department of Information Technology, Uppsala University | Sweden                                                     |
| Netto-Ferreira, Andre | Professor                                                | Universidade Federal do Rio Grande do Sul                                                                               | Brazil                                                     |
| Neubauer, Grzegorz    | researcher, biology                                      | University of Wroclaw                                                                                                   | Poland                                                     |
| Neuberger, Doris      | Professor of Economics                                   | University of Rostock                                                                                                   | Germany                                                    |
| Neufeld, Howard       | Professor of Plant Ecophysiology                         | Appalachian State University                                                                                            | United States of America (the)                             |
| Neufeld, Josh         | Professor                                                | University of Waterloo                                                                                                  | Canada                                                     |
| Neuhaus, Peter        | Adjunct Professor, Biology                               | University of Calgary                                                                                                   | Canada                                                     |
| Neuman-Lee, Lorin     | Biological Sciences                                      | Arkansas State University                                                                                               | United States of America (the)                             |
| Neumann, Peter        | Professor                                                | Institute of Bee Health, Vetsuisse Faculty, University of Bern                                                          | Switzerland                                                |
| Neumann, Rebecca      | Associate Professor in Civil & Environmental Engineering | University of Washington                                                                                                | United States of America (the)                             |
| Neumann, Daniel       | Scientist, Earth System and Environmental Modeling       | German Climate Computing Center                                                                                         | Germany                                                    |
| Neumüller, Ulrich     | PhD candidate/scientific Assistant                       | University of Ulm                                                                                                       | Germany                                                    |
| Neusser, Timea        | Zoology                                                  | Ludwig-Maximilians University Munich                                                                                    | Germany                                                    |
| Neusüß, Christian     | Professor for Analytical Chemistry                       | Aalen University                                                                                                        | Germany                                                    |
| Neveu, Jérémy         | Associate professor in astrophysics                      | Université Paris-Sud / LAL                                                                                              | France                                                     |
| Nevo, Eviatar         | Professor of Evolutionary Biology                        | Director, International Graduate Center of Evolution, Institute of Evolution, University of Haifa                       | Israel                                                     |
| Nevoux, Marie         | Researcher in Ecology                                    | INRA                                                                                                                    | France                                                     |
| Newell, Peter         | Assistant Professor Biological Sciences                  | State University of New York at Oswego                                                                                  | United States of America (the)                             |
| Newell, David         | Senior Lecturer Environmental Science                    | Southern Cross University                                                                                               | Australia                                                  |
| Newhart, KayLynn      | Environmental Scientist                                  | California Environmental Protection Agency                                                                              | United States of America (the)                             |
| Newman, Hector        | PhD Student in Antibiotic Resistance                     | University of Warwick                                                                                                   | United Kingdom of Great Britain and Northern Ireland (the) |
| Newman, Jacalyn       | Ph.D. Biochemistry, Microbiology, and Molecular Biology  |                                                                                                                         | United States of America (the)                             |
| Newman, Sarah         | MSc Entomology                                           | University of Pretoria                                                                                                  | South Africa                                               |
| Newman, Raymond       | Professor of Fisheries                                   | University of Minnesota                                                                                                 | United States of America (the)                             |
| Newman, Erica         | Research scientist, Ecology and Evolutionary Biology     | University of Arizona                                                                                                   | United States of America (the)                             |
| Newport, Mary Ellen   | Secondary School Biology Teacher                         | Interlochen Center for the Arts                                                                                         | United States of America (the)                             |
| Newton, John          | Research Entomologist (retired)                          | Rentokil PLC UK R&D Laboratory                                                                                          | United Kingdom of Great Britain and Northern Ireland (the) |
| Newton, Rosemary      | Plant Scientist                                          | Royal Botanic Gardens, Kew                                                                                              | United Kingdom of Great Britain and Northern Ireland (the) |

|                         |                                                                                                                                             |                                                                      |                                                            |
|-------------------------|---------------------------------------------------------------------------------------------------------------------------------------------|----------------------------------------------------------------------|------------------------------------------------------------|
| Ng, Melissa             | Research Fellow, Immunology                                                                                                                 | Singapore Immunology Network                                         | Singapore                                                  |
| Ng, Katherina           | Ecology                                                                                                                                     | The Australian National University                                   | Australia                                                  |
| NGBANA, Théophile Elias | Etudiant chercheur                                                                                                                          | Université Senghor à Alexandrie                                      | Central African Republic (the)                             |
| NGOC TRAN, NGUYEN       | Professor Doctor Applied Mathematics & Fluid Mechanics                                                                                      | VIETNAM NATIONAL UNIVERSITY HOCHIMINH-CITY                           | Viet Nam                                                   |
| Nguyen, Hong Hai        | Lecturer                                                                                                                                    | Vietnam National University of Forestry                              | Viet Nam                                                   |
| Nguyen, Brittney        | PhD Candidate, Microbiology                                                                                                                 | UC Berkeley                                                          | United States of America (the)                             |
| Nguyen, Karena          | PhD Candidate                                                                                                                               | University of South Florida                                          | United States of America (the)                             |
| Nguyen, Trang           | PhD of Plant Biotechnology                                                                                                                  | University of Canterbury, Christchurch                               | New Zealand                                                |
| Nguyen, Vinh            |                                                                                                                                             | CzechGlobe                                                           | Czech Republic (the)                                       |
| Nguyen, Nhu             | Assistant Researcher                                                                                                                        | University of Hawaii at Manoa                                        | United States of America (the)                             |
| Nguyen, Vinh            | Ecologist                                                                                                                                   | Institute of Tropical Biology                                        | Viet Nam                                                   |
| NGUYEN-HUU, Adrien      | Assistant Professor in Economics                                                                                                            | University of Montpellier                                            | France                                                     |
| Nicholl, Carolyn        | Retired Science Teacher, Inspector and Adviser                                                                                              | Warwickshire County Council                                          | United Kingdom of Great Britain and Northern Ireland (the) |
| Nichols, Hazel          | Lecturer in Biosciences                                                                                                                     | Swansea University                                                   | United Kingdom of Great Britain and Northern Ireland (the) |
| Nichols, J Doland       | Associate Professor, Forest Science and Management, Southern Cross University, BS Uni Oregon, MSc Purdue University, PhD Northern Arizona U | Southern Cross University Lismore NSW Australia                      | Australia                                                  |
| Nicholson, Lisa         | Beach-nesting Birds Project officer (PhD)                                                                                                   | BirdLife Australia                                                   | Australia                                                  |
| Nicholson, Georgina     | Marine Science                                                                                                                              | University of Auckland                                               | New Zealand                                                |
| Nicholson, Lindsey      | Researcher                                                                                                                                  | University of Innsbruck                                              | Austria                                                    |
| Nickels, Lyndsey        | Professor of Cognitive Science                                                                                                              | Macquarie University                                                 | Australia                                                  |
| Nicol, Graeme           | Professor of microbial ecology                                                                                                              | University of Lyon                                                   | France                                                     |
| Nicolai, Annegret       | Researcher in Conservation Biology and Ecological Economics                                                                                 | University Rennes 1, Station Biologique de Paimpont, UMR 6553 EcoBio | France                                                     |
| Nicolas, Stéphane       | Researcher / Plant Geneticist                                                                                                               | INRA                                                                 | France                                                     |
| Nicolas, Delphine       | Researcher                                                                                                                                  | Tour du Valat                                                        | France                                                     |
| Nicolas, Violaine       | Assistant Professor                                                                                                                         | Museum National d'Histoire Naturelle                                 | France                                                     |
| Nicolas, Dubos          | Researcher in macroecology                                                                                                                  | MNHN                                                                 | France                                                     |
| Nicolle, Pierre         | Engineer in Hydrology                                                                                                                       | Irstea                                                               | France                                                     |
| Nieberding, Caroline    | Professor in Ecology and Biology                                                                                                            | University of Louvain (UCLouvain)                                    | Belgium                                                    |
| Nielsen, Luisa          | Research Assistant                                                                                                                          | Globe Institute                                                      | Denmark                                                    |
| Nielsen, Birte L        | Senior Scientist                                                                                                                            | INRA                                                                 | France                                                     |
| Nielsen, Sven N.        | Professor, Geology and Paleontology                                                                                                         | Universidad Austral de Chile                                         | Chile                                                      |
| Nielsen, Uffe           | Senior Lecturer, Ecology                                                                                                                    | Western Sydney University                                            | Australia                                                  |
| Nielsen, Daniel         | Research Scientist, Microbiology                                                                                                            |                                                                      | Australia                                                  |
| Niemann, Sascha         | M.Sc. geoecology                                                                                                                            | Alfred-Wegener-Institut                                              | Germany                                                    |
| Niemeyer, Julia         | PhD student in Ecology                                                                                                                      | Federal University of Rio de Janeiro                                 | Brazil                                                     |
| Niemi, Gerald           | Professor Emeritus                                                                                                                          | University of Minnesota-Duluth                                       | United States of America (the)                             |

|                          |                                                                |                                                                                        |                                                            |
|--------------------------|----------------------------------------------------------------|----------------------------------------------------------------------------------------|------------------------------------------------------------|
| Nieminen, Eini           | PhD Student, Ecology and Conservation Science                  | University of Jyväskylä, Department of Biological and Environmental Science            | Finland                                                    |
| Niepelt, Raphael         | Postdoctoral researcher                                        | Institute for solar energy research Hamelin ISFH                                       | Germany                                                    |
| Nieters, Anne            | Scientific researcher climate economics                        | Institute of economic structure research (GWS mbH)                                     | Germany                                                    |
| Nieto Feliner, Gonzalo   | Researcher, plant evolutionary biology                         | Royal Botanic Garden, CSIC, Madrid                                                     | Spain                                                      |
| Nieto-Lugilde, Diego     | Assistant Professor of Botany (Biology)                        | Universidad de Córdoba                                                                 | Spain                                                      |
| Nieto-Román, Alejandra   | Postdoctoral researcher                                        | Consejo Superior de Investigaciones Científicas                                        | Spain                                                      |
| NIEVA, F. JAVIER J.      | COLLEGE PROFESSOR / ECOLOGY                                    | UNIVERSIDAD DE HUELVA                                                                  | Spain                                                      |
| Nievaes, Marie Frances   | Associate Professor                                            | University of the Philippines Visayas                                                  | Philippines (the)                                          |
| Nieves-Aldrey, Jose Luis | Scientific researcher                                          | Museo Nacional de Ciencias Naturales (CSIC)                                            | Spain                                                      |
| Niewint Gori, Jessica    | STEAM Education                                                | Indire                                                                                 | Italy                                                      |
| Niezrecki, Christopher   | Professor and Chair                                            | University of Massachusetts Lowell                                                     | United States of America (the)                             |
| Niggemann, Jutta         | Research Scientist Geosciences                                 | Institute for Chemistry and Biology of the Marine Environment, University of Oldenburg | Germany                                                    |
| Nigrelli, Guido          | Researcher                                                     | NJational Research Council of Italy                                                    | Italy                                                      |
| Niinemets, Ülo           | Professor, Head of Department                                  | Estonian University of Life Sciences                                                   | Estonia                                                    |
| Nijman, Vincent          | Professor in Anthropology                                      | Oxford Brookes University                                                              | United Kingdom of Great Britain and Northern Ireland (the) |
| Nijsse, Femke            | PhD candidate in climate dynamics                              | University of Exeter                                                                   | United Kingdom of Great Britain and Northern Ireland (the) |
| Nikinmaa, Mikko          | Professor Emaritus of Zoology                                  | University of Turku                                                                    | Finland                                                    |
| Nikleka, Enkeleda        | Academic staff                                                 | Agriculture University of Tirana                                                       | Albania                                                    |
| Nikola, Jajcay           | Postdoctoral fellow                                            | Technische Universität Berlin                                                          | Germany                                                    |
| Nikolaus, Robert         | Scientific Staff                                               | Leibniz Institute of Freshwater Ecology and Inland Fisheries                           | Germany                                                    |
| Nikolausz, Marcell       | Senior scientist / Microbiology                                | UFZ                                                                                    | Germany                                                    |
| Nikolic, Natacha         | Doctor in Sciences                                             | IRD                                                                                    | Réunion                                                    |
| Nikstat, Amelie          | Psychologist                                                   | Bielefeld University                                                                   | Germany                                                    |
| Nilles, Jack             | Physics and Systems Engineering                                | University of Southern California, emeritus                                            | United States of America (the)                             |
| NIR, YAACOV              | Marine Geologist                                               | RETIRED Geological Survey of Israel                                                    | Israel                                                     |
| Nisa, Shahista           | Postdoctoral Fellow                                            | Massey University                                                                      | New Zealand                                                |
| Nisbett, Richard A       | Spiritual Ecology, Public Health, Biological Anthropology      | UL-Pire                                                                                | Liberia                                                    |
| Nishio, John             | CEO (Molecular and physiological plant biologist)              | Sol Dance Technologies LLC; JNT Technologies LLC                                       | United States of America (the)                             |
| Nissani, Moti            | Professor emeritus, Dept. Biology / Geneticist                 | Wayne State University                                                                 | Argentina                                                  |
| Nitsch, Aida             | Behavioural Ecology                                            |                                                                                        | France                                                     |
| Niz, Gustavo             | Associate professor                                            | Universidad de Guanajuato                                                              | Mexico                                                     |
| Nizzetto, Luca           | Senior research scientist/environmental sciences               | Norwegian Institute for Water Research                                                 | Norway                                                     |
| Njabo, Kevin             | Africa Director, Assistant Professfor                          | UCLA Congo Basin Institute                                                             | Cameroon                                                   |
| Nkaizirwa, Josephat Paul |                                                                | University of Dodoma                                                                   | Tanzania, United Republic of                               |
| Nkubli, Flavious         | Senior Lecturer and Honorary Clinical Radiographer/Radiography | University of Maiduguri and University of Maiduguri Teaching Hospital                  | Nigeria                                                    |

|                                |                                                                                |                                                                 |                                                            |
|--------------------------------|--------------------------------------------------------------------------------|-----------------------------------------------------------------|------------------------------------------------------------|
| Nmor, Stanley                  | MSc Student                                                                    | Ghent University                                                | Belgium                                                    |
| Nnaji, Omenmayor               | Marine biologist                                                               | University of Lagos                                             | Nigeria                                                    |
| Noacco, Valentina              | Senior Research Associate                                                      | University of Bristol                                           | United Kingdom of Great Britain and Northern Ireland (the) |
| Nobi, Kenneth                  | REDD+                                                                          | Climate Change & Development Authority (CCDA)                   | Papua New Guinea                                           |
| Noble, Michael                 | Invasive species management                                                    |                                                                 | Australia                                                  |
| Noble, Robert                  | Postdoctoral researcher, Evolutionary biology                                  | ETH Zurich                                                      | Switzerland                                                |
| Nobre, Carlos                  | Senior Researcher                                                              | Institute of Advanced Studies, University of São Paulo          | Brazil                                                     |
| Nobre Carvalho, Lucélia        | Associate Professor                                                            | Universidade Federal de Mato Grosso                             | Brazil                                                     |
| Nogueira, Miodeli              | PERMANENT PROFESSOR                                                            | UFPB                                                            | Brazil                                                     |
| Nogueira dos Reis, Sandra      | Astrophysics PhD student                                                       | Instituto de Astrofísica e Ciências do Espaço                   | Portugal                                                   |
| Noguera-Urbano, Elkin A.       | Biogeography researcher                                                        | Instituto Humboldt                                              | Colombia                                                   |
| Nogues, Xavier                 | University Lecturer                                                            | University of Bordeaux                                          | France                                                     |
| Nokelainen, Ossi               | PhD, Ecology and Evolutionary Biology                                          | University of Jyväskylä                                         | Finland                                                    |
| Nolan, James                   | Associate Professor of Biology                                                 | Georgia Gwinnett College                                        | United States of America (the)                             |
| Nolasco da Silva, Marcos Tadeu | Associate Professor of Pediatrics                                              | State University of Campinas                                    | Brazil                                                     |
| Noll, Markus                   | Prof. em. of Molecular Biology, Molecular Genetics, Development, and Evolution | University of Zurich                                            | Switzerland                                                |
| Nolwenn, Renaud                | Assistant ingénieur                                                            | Cnrs                                                            | France                                                     |
| Nonnis Marzano, Carlotta       | Researcher in Zoology                                                          | University of Bari Aldo Moro                                    | Italy                                                      |
| Noone, Kevin                   | Professor                                                                      | Department of Environmental Science, Stockholm University       | Sweden                                                     |
| Nophut, Sara Lena              | Chemistry, PhD Candidate                                                       | TU Darmstadt                                                    | Germany                                                    |
| Norberg, Peter                 | PhD                                                                            | Ersta Sköndals Högskola                                         | Sweden                                                     |
| Norberg, Rolf Åke              | Docent Emeritus                                                                | Department of Biology and Environment, University of Gothenburg | Sweden                                                     |
| Norby, Richard                 | Ecosystem ecologist                                                            | Oak Ridge, Tennessee                                            | United States of America (the)                             |
| Nord, Christina                | PhD Candidate                                                                  | University of Lethbridge                                        | Canada                                                     |
| Nordeen, Jacqueline-           | B.S., Animal Science                                                           | University of Missouri-Columbia                                 | United States of America (the)                             |
| Norder, Sietze                 | PhD candidate - Island Biogeography in the Quaternary and Anthropocene         | Centre for Ecology, Evolution, and Environmental Changes (cE3c) | Portugal                                                   |
| Nordholm, Johan                | Senior Scientist in Life Science company, PhD in Biochemistry                  | Stockholm University                                            | Sweden                                                     |
| Nordmann, Arne                 | Engineering                                                                    | Robert Bosch GmbH                                               | Germany                                                    |
| Noret, Nausicaa                | Plant biology                                                                  | Université libre de Bruxelles                                   | Belgium                                                    |
| Norgaard, Richard B.           | Professor Emeritus of Energy and Resources                                     | University of California, Berkeley                              | United States of America (the)                             |
| Nori, Javier                   |                                                                                | Universidad Nacional de Córdoba                                 | Argentina                                                  |
| Noriega, Jorge Ari             | Research associate / Ecosystem services                                        | Universidad de los Andes                                        | Colombia                                                   |
| Norlin, Andreas                | PhD student in Marine Biology                                                  | Swansea University                                              | United Kingdom of Great Britain and Northern Ireland (the) |
| Norman, Jenny                  | PhD                                                                            | University of Wollongong                                        | Australia                                                  |
| Normand, Frederic              | researcher in tropical horticulture                                            | CIRAD                                                           | Réunion                                                    |

|                            |                                                               |                                                                             |                                                            |
|----------------------------|---------------------------------------------------------------|-----------------------------------------------------------------------------|------------------------------------------------------------|
| Normandeau, Magdalen       | Physics Instructor                                            | University of New Brunswick                                                 | Canada                                                     |
| norris, catrin             | Marine biologist                                              | University of York                                                          | United Kingdom of Great Britain and Northern Ireland (the) |
| North, Christopher         | Ecologist                                                     |                                                                             | United States of America (the)                             |
| North, Gretchen            | Professor of Biology                                          | Occidental College                                                          | United States of America (the)                             |
| Northcutt MD, Alan         | Pathology/Dermatopathology                                    | Central Texas Pathology Laboratory                                          | United States of America (the)                             |
| norton, marieke            | PhD, Social Anthropology                                      | ACDI, University of Cape Town                                               | South Africa                                               |
| Norton, Michael            | Professor (retired)                                           | Tokyo Institute of Technology                                               | Japan                                                      |
| Norton, Briony             | Postdoctoral Researcher, Ecology                              | University of Derby                                                         | United Kingdom of Great Britain and Northern Ireland (the) |
| Norton, Philipp            | Postdoc, Computational Neuroscience                           | Humboldt Universität zu Berlin                                              | Germany                                                    |
| Norvez, Olivier            | Science outreach coordinator                                  | Biological Field Station of Paimpont - University of Rennes                 | France                                                     |
| Nosetto, Marcelo           | Researcher                                                    | CONICET                                                                     | Argentina                                                  |
| Not, Fabrice               | Senior researcher in ecology and oceanography                 | CNRS                                                                        | France                                                     |
| Nothnagel, Axel            | Geodesist, Science Advisor, Consultant                        | Technische Universität Wien Department für Geodäsie und Geoinformation      | Austria                                                    |
| Nou, Tida                  | Threatened Species Recovery Hub                               | University of Queensland                                                    | Australia                                                  |
| Nougier, Marc              | Research Engineer                                             |                                                                             | France                                                     |
| Novaes, Roberto Leonan M.  | Researcher                                                    | Universidade Federal do Rio de Janeiro                                      | Brazil                                                     |
| Novaes, Renan              | Life cycle assessment                                         |                                                                             | Brazil                                                     |
| Novaes-e-Fagundes, Gabriel | PhD student                                                   | Universidade Estadual de Santa Cruz (UESC)                                  | Brazil                                                     |
| Novak, Lukas VF            | PhD Candidate, Evolutionary Protistology                      | Charles University                                                          | Czech Republic (the)                                       |
| Novak, Mark                | Associate Professor, Ecology                                  | Oregon State University                                                     | United States of America (the)                             |
| Novo, María                | Full Professor/Chairholder                                    | UNESCO Chair in Environmental Education and Sustainable Development         | Spain                                                      |
| NOVO, MARIA                | Honorary President                                            | UNESCO CHAIR IN ENVIRONMENTAL EDUCATION AND SUSTAINABLE DEVELOPMENTS. UNED. | Spain                                                      |
| Novoa, Ana                 | Researcher                                                    | Institute of Botany, Academy of Sciences of the Czech Republic              | Czech Republic (the)                                       |
| Novoa, Carla               | Plant Sociologist                                             | Institute of Geobotany, LUH                                                 | Germany                                                    |
| Nowak, Katarzyna           | Fellow                                                        | The Safina Center                                                           | United States of America (the)                             |
| Nowak, Norman              | Research Scientist, Chemist                                   | Fraunhofer Institute for Toxicology and Experimental Medicine               | Germany                                                    |
| Nowell, Reuben             | Postdoctoral Researcher                                       | Imperial College London                                                     | United Kingdom of Great Britain and Northern Ireland (the) |
| Noyola, Adalberto          | Senior researcher, environmental engineering                  | Instituto de Ingeniería UNAM                                                | Mexico                                                     |
| Nozal García, Vanesa       | PhD in Organic Chemistry                                      | Centro de Investigaciones Biológicas. CSIC                                  | Spain                                                      |
| NTEP TONMAM, Noe Lucien    | Ph.D. Student in Ecology                                      | University of Douala                                                        | Cameroon                                                   |
| Ntloko, Bokang             | Land Management & Rehabilitation Coordinator                  | Letseng Deammk                                                              | Lesotho                                                    |
| Nuerk, Nicolai M.          | Researcher (Dr. rer. nat.) / Biodiversity & Plant Systematics | University of Bayreuth                                                      | Germany                                                    |



|                                   |                                                                                                                                                                     |                                                              |                                                            |
|-----------------------------------|---------------------------------------------------------------------------------------------------------------------------------------------------------------------|--------------------------------------------------------------|------------------------------------------------------------|
| Nüesch-Inderbinen, Magdalena      | Microbiologist                                                                                                                                                      | University of Zürich                                         | Switzerland                                                |
| Nuijten, Rascha                   | PhD candidate                                                                                                                                                       | NIOO-KNAW                                                    | Netherlands (the)                                          |
| Nukarinen, Ella                   |                                                                                                                                                                     | University of Vienna                                         | Austria                                                    |
| Nunes, Pedro M. Sales             | Adjunct Professor, Zoology                                                                                                                                          | Universidade Federal de Pernambuco (UFPE)                    | Brazil                                                     |
| Nunes-Freitas, André Felipe       | Professor/ Forest Ecology                                                                                                                                           | Universidade Federal Rural do Rio de Janeiro                 | Brazil                                                     |
| NunesdaCunha, Catia               | Titular professor                                                                                                                                                   | Federal university of Mato Grosso                            | Brazil                                                     |
| Nunez, Almudena                   | Research Associate                                                                                                                                                  | RIFS Potsdam                                                 | Germany                                                    |
| Núñez, Karen Elizabeth            | PhD student                                                                                                                                                         | Instituto Potosino de Investigación Científica y Tecnológica | Mexico                                                     |
| Núñez Samudio, Virginia           | Medical Doctor                                                                                                                                                      | Instituto de Ciencias Médicas                                | Panama                                                     |
| Núñez Villalobos, María Alejandra | Urbanism                                                                                                                                                            | Independent Researcher                                       | Mexico                                                     |
| Nunez-Mino, Jose                  | Director                                                                                                                                                            | Bat Conservation Trust                                       | United Kingdom of Great Britain and Northern Ireland (the) |
| Nunn, Patrick                     | Professor of Geography                                                                                                                                              | University of the Sunshine Coast                             | Australia                                                  |
| Nunn, Alana                       | Coral Reef Restoration Manager/ Ecology and Environmental Biology                                                                                                   | University of North Carolina                                 | United States of America (the)                             |
| Nunnally, Clifton                 | Research Scientist Biological Oceanography                                                                                                                          | Louisiana Universities Marine Consortium                     | United States of America (the)                             |
| Nuriel, Perach                    | Geochemistry                                                                                                                                                        | Geological Survey Of Israel                                  | Israel                                                     |
| Nursamsi, Ilyas                   | Research Coordinator                                                                                                                                                | BICONS Indonesia                                             | Indonesia                                                  |
| Nusbaumer, David                  | Doctoral Researcher, Ecology & Evolution                                                                                                                            | University of Lausanne                                       | Switzerland                                                |
| Nusko, Robert                     | Vorstand / Chemist                                                                                                                                                  | RAS AG                                                       | Germany                                                    |
| Nuss-Girona, Sergi                | Researcher / Environmental Scientist                                                                                                                                | University of Girona                                         | Spain                                                      |
| Nuttman, Clive                    |                                                                                                                                                                     | Tropical Biology Association                                 | United Kingdom of Great Britain and Northern Ireland (the) |
| Nuyens, Louis                     | B.S. Physics, B.S. Electrical Engineering; High School Teacher, After-school Science Enrichment Program Director, and Consultant: Data Analysis, Advocacy Campaigns | Watershed Preservation Network                               | United States of America (the)                             |
| Nuytinck, Jornde                  | Researcher                                                                                                                                                          | Naturalis Biodiversity Center                                | Netherlands (the)                                          |
| Nyanga, Charles                   | Marine Ecosystems Based Management and Climate Change                                                                                                               | Zambia College of Agriculture                                | Zambia                                                     |
| Nyarko, Samuel                    | PhD Candidate                                                                                                                                                       |                                                              | Belgium                                                    |
| Nygren, Anja                      | Professor, Development Studies                                                                                                                                      | University of Helsinki                                       | Finland                                                    |
| Nyhus, Philip                     | Associate Professor of Environmental Studies                                                                                                                        | Colby College                                                | United States of America (the)                             |
| Nylund, Amanda                    | PhD Student, Marine Science                                                                                                                                         | Chalmers University of Technology                            | Sweden                                                     |
| Nyssen, Jan                       | Senior Professor (physical geography)                                                                                                                               | Ghent University, Department of Geography                    | Belgium                                                    |
| Ó Broin, Eoin                     | Research fellow Energy System Modelling                                                                                                                             | EnvEcon                                                      | Ireland                                                    |
| O' Mahony, Rosella                | PhD Student                                                                                                                                                         | University College Cork                                      | Ireland                                                    |
| O'Born, Reyn                      | Associate Professor                                                                                                                                                 | University of Agder                                          | Norway                                                     |
| O'Brien, Joshua                   | Ecologist                                                                                                                                                           |                                                              | United States of America (the)                             |
| O'Brien, Mary H.                  | Botanist; Utah Forests Program Director                                                                                                                             | Grand Canyon Trust                                           | United States of America (the)                             |
| O'Brien, Justine                  | Manager of Conservation Science                                                                                                                                     | Taronga Conservation Society Australia                       | Australia                                                  |

|                        |                                                                   |                                                                      |                                                            |
|------------------------|-------------------------------------------------------------------|----------------------------------------------------------------------|------------------------------------------------------------|
| O'Connell, Matthew     | Historical Ecology                                                | Charles Sturt University                                             | Australia                                                  |
| O'Connell, Anita       | Teacher Earth Science and Biology                                 | Sydney uni                                                           | Australia                                                  |
| O'Connor, David        | Postdoctoral Research Fellow                                      | Texas A&M University Corpus Christi                                  | United States of America (the)                             |
| O'Connor, Patrick      | Associate Professor Ecological Economics                          | The University of Adelaide                                           | Australia                                                  |
| O'Dea, Aaron           | Staff Scientist                                                   | Smithsonian Tropical Research Institute                              | Panama                                                     |
| O'Donnell, Timothy     | Assistant Professor                                               | McGill University                                                    | Canada                                                     |
| O'Dwyer, Jean          | Lecturer in Environmental Science                                 | University College Cork                                              | Ireland                                                    |
| O'Flynn, Colette       | Invasive Species Officer                                          |                                                                      | Ireland                                                    |
| O'Hare, Adele          | Psychology research assistant and provisional psychologist        | Queensland University of Technology                                  | Australia                                                  |
| O'Higgins, Paul        | Professor researching past human adaptations                      | University of York                                                   | United Kingdom of Great Britain and Northern Ireland (the) |
| O'Neill, Norm          | Professor                                                         | Université de Sherbrooke                                             | Canada                                                     |
| O'Reilly, Andrias      | Lecturer in Neurobiology                                          | Liverpool John Moores University                                     | United Kingdom of Great Britain and Northern Ireland (the) |
| O'Sullivan, Jane       | Honorary Senior Research Associate, Agriculture and Food Sciences | University of Queensland                                             | Australia                                                  |
| O' Brien, Justine      | Research Biologist, Conservation Science Manager                  | Taronga Conservation Society Australia                               | Australia                                                  |
| O' Connor, Louise      | PhD - biodiversity science                                        | Laboratoire d' écologie alpine                                       | France                                                     |
| Oakley, Hazel          | Managing Director                                                 | Tropical Reseach And Conservation Centre                             | Malaysia                                                   |
| Oates, Lori Lee        | Term Teaching Appointment in Sociology                            | Memorial University of Newfoundland                                  | Canada                                                     |
| Obbard, Martyn         | Emeritus Research Scientist                                       | Ontario Ministry of Natural Resources and Forestry                   | Canada                                                     |
| Oberding, Tomas J      | PhD, Ecological and Marine Research                               |                                                                      | United States of America (the)                             |
| Oberding, Tomáš        | Environmental Management faculty                                  | University of Phoenix                                                | United States of America (the)                             |
| Obiakara, Maxwell      | PhD Candidate                                                     | University of Ibadan                                                 | Nigeria                                                    |
| Obleitner, Friedrich   |                                                                   | University of Innsbruck                                              | Austria                                                    |
| Oborny, Beáta          | Associate Professor, Ecology                                      | Loránd Eötvös University, Budapest                                   | Hungary                                                    |
| Obradors, Xavier       | Research Professor / Materials Science                            | Institut Materials Science Barcelona (ICMAB - CSIC)                  | Spain                                                      |
| Obrist, Daniel         | Professor, Environmental Science                                  | University of Massachusetts, Lowell                                  | United States of America (the)                             |
| ocampo, valentina      | biologist master student                                          | barcelona university                                                 | Colombia                                                   |
| Ochoa, Luz             | Posdoctoral research                                              | Museu de Zoologia, Universidade de São Paulo                         | Brazil                                                     |
| Ochoa-Herrera, Valeria | Professor, Environmental Engineering                              | Universidad San Francisco de Quito                                   | Ecuador                                                    |
| Ochoa-Sánchez, Ana     | PhD candidate in Water Resources                                  | University of Cuenca                                                 | Ecuador                                                    |
| OConnell, John         | Professor Emeritus, Chemical Engineering                          | University of Virginia, California Polytechnic State University, SLO | United States of America (the)                             |
| OConnell, Suzanne      | Professor, Earth & Environmental Sciences                         | Wesleyan University                                                  | United States of America (the)                             |
| OConnor, Barrt         | Prof. Emeritus Ecology & Evolutionary Biology                     | University of Michigan                                               | United States of America (the)                             |
| Octaviano, Claudia     | General Coordinator for Climate Change Mitigation                 | National Institute of Ecology and Climate Change                     | Mexico                                                     |
| Oda, Tatiana           | PhD candidate on Civil Engineering                                | Universidade Federal de Viçosa                                       | Brazil                                                     |
| Odriozola, Iñaki       | Postdoc                                                           | Czech Academy of Sciences                                            | Spain                                                      |
| Oehri, Jacqueline      |                                                                   | University of Zurich                                                 | Switzerland                                                |
| Offre, Pierre          | Tenure Track Scientist - Microbiologist                           | NIOZ Royal Netherlands Institute for Sea Research                    | Netherlands (the)                                          |

|                             |                                                                                     |                                                                                                                                      |                                                            |
|-----------------------------|-------------------------------------------------------------------------------------|--------------------------------------------------------------------------------------------------------------------------------------|------------------------------------------------------------|
| Oganesyan, Vaheh            | Sr. Scientist/Protein Crystallography                                               | AstraZeneca                                                                                                                          | United States of America (the)                             |
| Ogbuigwe, Paul              | PhD Candidate                                                                       | Massey University                                                                                                                    | New Zealand                                                |
| Ogg, Derek                  | Chief Scientific Officer - Structural Biology                                       | Peak Proteins Ltd.                                                                                                                   | United Kingdom of Great Britain and Northern Ireland (the) |
| Oggioni, Silvio Daniele     | Ecology and Forestry                                                                | European Forest Institute                                                                                                            | Germany                                                    |
| Ogren, Thomas               | allergy researcher/ horticulturist/ writer                                          |                                                                                                                                      | United States of America (the)                             |
| Oguey, Christophe           | associate professor, physics                                                        | University of Cergy-Pontoise                                                                                                         | France                                                     |
| Oguntuase, Oluwaseun James  | Scholar-practitioner                                                                | Centre for Environmental Studies and Sustainable Development, Nigeria                                                                | Nigeria                                                    |
| Ogutu, Keroboto B. Za'Ngoti | Lecturer in Mathematics                                                             | Dedan Kimathi University of Technology                                                                                               | Kenya                                                      |
| ohara, willian              | Professor                                                                           | Universidade Federal de Rondônia                                                                                                     | Brazil                                                     |
| Ohowski, Brian              | Advanced Lecturer                                                                   | Loyola University Chicago                                                                                                            | United States of America (the)                             |
| Ojeda, Valeria              | Associate Researcher, Ecology                                                       | CONICET                                                                                                                              | Argentina                                                  |
| Ojeda, Jaime                | Assistant Research                                                                  | Universidad de Magallanes                                                                                                            | Chile                                                      |
| Ojeda Luna, Tatiana         | Researcher                                                                          | Georg-August Universität Göttingen                                                                                                   | Ecuador                                                    |
| Ojeh, Vincent               | Senior Lecturer/ Department of Geography,                                           | Taraba State University Jalingo                                                                                                      | Nigeria                                                    |
| Ojo, Theresa                | PhD student                                                                         | University of Kwazulu natal, PMB, South Africa.                                                                                      | South Africa                                               |
| Oklander, Luciana Ines      | Associate Researcher                                                                | CONICET                                                                                                                              | Argentina                                                  |
| Oklander, Luciana           | Associate Researcher                                                                | Consejo Nacional de Investigaciones Científicas y Técnicas, ARGENTINA. (National Scientific and Technical Research Council, CONICET) | Argentina                                                  |
| OKONI-WILLIAMS, ARNOLD      | SENIOR LECTURER AND HEAD OF DEPARTMENT                                              | BIOLOGICAL SCIENCES DEPT, FBC, UNIVERSITY OF SIERRA LEONE                                                                            | Sierra Leone                                               |
| Oksanen, Tarja              | Senior Scientist, Ecology                                                           | UiT - The Arctic University of Norway and University of Turku, Finland                                                               | Norway                                                     |
| Oksanen, Lauri              | emeritus professor, ecology                                                         | UiT - The Arctic University of Norway and University of Turku, Finland                                                               | Norway                                                     |
| Oktaufik, MAM               | PhD., Principal Engineer, Renewable Energy & Energy Efficiency Engineering Research | BPPT                                                                                                                                 | Indonesia                                                  |
| Olaru, Marian               | Postdoctoral researcher chemistry                                                   | FB2 biologie/chemie, Universität Bremen                                                                                              | Germany                                                    |
| Olave, Melisa               | Assistant Researcher                                                                | CONICET                                                                                                                              | Argentina                                                  |
| Olberg, Robert              | Professor of Biological Sciences                                                    | Union College, Schenectady, NY                                                                                                       | United States of America (the)                             |
| Oldeland, Jens              | Ecologist                                                                           | University of Hamburg                                                                                                                | Germany                                                    |
| Oldeman, Arthur             | PhD Candidate                                                                       | Utrecht University                                                                                                                   | Netherlands (the)                                          |
| Oldis, Dale                 | Science Teacher                                                                     | Glen bard West High School                                                                                                           | United States of America (the)                             |
| Olea, Pedro P.              | Assitant Professor                                                                  | Dpto. Ecología, Universidad Autónoma de Madrid                                                                                       | Spain                                                      |
| Oleas, Nora                 | Associate Professor, Biology                                                        | Universidad Tecnológica Indoamérica                                                                                                  | Ecuador                                                    |
| Olefs, Marc                 | Head of climate research, climatologist                                             | ZAMG                                                                                                                                 | Austria                                                    |
| Olesen, Lars                | CEO & Founder                                                                       | Circ.eco                                                                                                                             | Denmark                                                    |
| Oleson, Kirsten             | Ecological Economist                                                                | University of Hawaii at Manoa                                                                                                        | United States of America (the)                             |
| Oliet, Juan A.              | Full professor in Forestry                                                          | Universidad Politécnica de Madrd                                                                                                     | Spain                                                      |
| Oliosio, Albert             | Researcher                                                                          | INRA                                                                                                                                 | France                                                     |

|                              |                                                                         |                                                                                                                                                                                                  |                                                            |
|------------------------------|-------------------------------------------------------------------------|--------------------------------------------------------------------------------------------------------------------------------------------------------------------------------------------------|------------------------------------------------------------|
| Oliveir, Pedro               | Senior Scientist                                                        | Mount Sinai School of Medicine                                                                                                                                                                   | United States of America (the)                             |
| Oliveira, Willams            | Master student in Plant Biology                                         | Universidade Federal de Pernambuco                                                                                                                                                               | Brazil                                                     |
| Oliveira, Teresa             | Wildlife Ecology                                                        |                                                                                                                                                                                                  | Portugal                                                   |
| Oliveira, Leonardo           | Adjunt professor                                                        | Faculdade de Formação de Professores- (FFP/UERJ)                                                                                                                                                 | Brazil                                                     |
| Oliveira, Adriana            | researcher                                                              | Universidade de Brasília                                                                                                                                                                         | Brazil                                                     |
| Oliveira, Marcus             | Professor                                                               | Universidade Estadual de Mato Grosso do Sul                                                                                                                                                      | Brazil                                                     |
| Oliveira, Emiliano Castro de | Professor / Geology                                                     | Federal University of São Paulo                                                                                                                                                                  | Brazil                                                     |
| Oliveira, Daniel             | Biologist                                                               | CIBIO-InBIO                                                                                                                                                                                      | Portugal                                                   |
| Oliveira, Nuno               | Marine Conservation Officer /:Biologist                                 | SPEA - Portuguese Society for the Study of Birds                                                                                                                                                 | Portugal                                                   |
| Oliveira, Claudio            | Full Professor                                                          | Universidade Estadual Paulista                                                                                                                                                                   | Brazil                                                     |
| Oliveira, Jader              | Research                                                                | SCHOOL OF PUBLIC HEALTH - UNIVERSITY OF SÃO PAULO - USP                                                                                                                                          | Brazil                                                     |
| Oliveira, Fernanda           | Postdoctoral Researcher                                                 | Universidade de Pernambuco                                                                                                                                                                       | Brazil                                                     |
| Oliveira, Marcia Divina      | Researcher, freshwater, wetlands                                        | Embrapa                                                                                                                                                                                          | Brazil                                                     |
| Oliveira, Eduardo            | Full Professor, Analytical Chemistry                                    | UFVJM                                                                                                                                                                                            | Brazil                                                     |
| Oliveira, Cláudia            | Postdoctoral researcher in Biological Sciences                          | Institute of Marine Research (IMAR) - University of the Azores                                                                                                                                   | Portugal                                                   |
| Oliveira, Flávio             | PhD student in Biology and Ecology of Global Changes                    | Department of Animal Biology and CESAM – Centre for Environmental and Marine Studies and Department of Animal Biology, Faculty of Sciences, University of Lisbon, Campo Grande, Lisbon, Portugal | Portugal                                                   |
| Oliver, Paul                 | Senior lecturer/Curator                                                 | Queensland Museum/Griffith University                                                                                                                                                            | Australia                                                  |
| Oliver, Margaret             | UT Herbarium collections manager                                        | University of Tennessee, Knoxville                                                                                                                                                               | United States of America (the)                             |
| Olivera Díaz, Domingo        | Profesor Investigador                                                   | Universidad Autónoma Chapingo                                                                                                                                                                    | Mexico                                                     |
| Oliveras, Imma               | Lecturer in Ecosystems Science                                          | University of Oxford                                                                                                                                                                             | United Kingdom of Great Britain and Northern Ireland (the) |
| Olivetti Belardinelli, Marta | Emeritus Professor - Sapienza University of Rome - Cognitive Psychology | Sapienza University of Rome                                                                                                                                                                      | Italy                                                      |
| Olivier, Léa                 | PhD student in Physical Oceanography                                    | LOCEAN - Sorbonne Université                                                                                                                                                                     | France                                                     |
| Olkowski, William            | Retired                                                                 | None                                                                                                                                                                                             | United States of America (the)                             |
| Öllerer, Kinga               | resercher                                                               | Institute of Biology Bucharest, Romanian Academy. MTA Centre for Ecological Research, Hungary                                                                                                    | Romania                                                    |
| Ollerhead, Katherine         | PhD student in Marine Biology                                           | University of Tasmania                                                                                                                                                                           | Australia                                                  |
| Ollerton, Jeff               | Professor of Biodiversity                                               | University of Northampton                                                                                                                                                                        | United Kingdom of Great Britain and Northern Ireland (the) |
| Ollinaho, Ossi               | post-doc, Development Studies                                           | University of Helsinki                                                                                                                                                                           | Finland                                                    |
| Ollivier, Mélodie            | phD student                                                             | Montpellier Supagro                                                                                                                                                                              | France                                                     |
| Olmo, Carla                  | Postdoc Ecology                                                         | University of Valencia                                                                                                                                                                           | Spain                                                      |
| Olmo, Gonzalo                | Theoretical Physics                                                     | University of Valencia                                                                                                                                                                           | Spain                                                      |
| Olmstead, Richard            | Professor of Biology and Herbarium Curator                              | University of Washington, Seattle                                                                                                                                                                | United States of America (the)                             |
| Olofsson, Malin              | Post doc                                                                | Department of Aquatic Sciences and Assessment at the Swedish University of Agricultural Sciences                                                                                                 | Sweden                                                     |

|                            |                                                                        |                                                                                                       |                                                               |
|----------------------------|------------------------------------------------------------------------|-------------------------------------------------------------------------------------------------------|---------------------------------------------------------------|
| Olsen, Penny               | Honorary pP                                                            | The Ayustralian National University                                                                   | Australia                                                     |
| Olsen, Knut                | Staff Astronomer                                                       | National Optical Astronomy Observatory                                                                | United States of America (the)                                |
| Olsen, Kenneth             | Modeling                                                               | University of Copenhagen                                                                              | Denmark                                                       |
| Olthoff, Adriana Ema       | Postdoctoral Researcher                                                | División Académica de Ciencias Biológicas,<br>Universidad Juárez Autónoma de Tabasco                  | Mexico                                                        |
| Olucha-Bordonau, Francisco | Associate Professor in Anatomy                                         | Universitat Jaume I                                                                                   | Spain                                                         |
| Ometto, Jean               | Senior Researcher / Global Change                                      | National Institute for Space Research (INPE)                                                          | Brazil                                                        |
| Omeyer, Lucy               | PhD researcher                                                         | University of Exeter                                                                                  | United Kingdom of Great Britain<br>and Northern Ireland (the) |
| Omoniyi, Gbenga            | Doctoral/écologie                                                      | Université de Rennes1                                                                                 | France                                                        |
| Ondraczek, Janosch         | Environmental and Resource Economist / Energy<br>Economist             | University of Hamburg, Research Unit Sustainability<br>and Global Change / European Investment Bank   | Germany                                                       |
| Onkels, Fabian             | Geography / Climatology / Referat fuer Oekologie und<br>Nachhaltigkeit | Wuerzburg University                                                                                  | Germany                                                       |
| Onnen-Weber, Udo           | Professor                                                              | Hochschule Wismar                                                                                     | Germany                                                       |
| Onstein, Renske            | Junior Research Group Leader Evolution & Adaptation                    | German Centre for Integrative Biodiversity Research<br>(iDiv) Halle-Jena-Leipzig                      | Germany                                                       |
| Oomen, Rebekah             | Postdoctoral Fellow in Evolutionary Ecology                            | University of Oslo                                                                                    | Norway                                                        |
| Oosthuizen, Tasha          | MSc student in Behavioral ecology                                      | University of Pretoria                                                                                | South Africa                                                  |
| Oosthuizen, Ane            | Marine conservationist                                                 | South African National Parks                                                                          | South Africa                                                  |
| Opazo, Juan                | Full Professor/Evolutionary Biology                                    | Universidad Austral de Chile                                                                          | Chile                                                         |
| Öpik, Maarja               | senior researcher, plant and fungal ecology                            | University of Tartu                                                                                   | Estonia                                                       |
| Oppenrieder, Niklas        | Medical Director                                                       | Physicians Association for Nutrition                                                                  | Germany                                                       |
| Oppermann, Serpil          | Professor of Environmental Humanities                                  | Cappadocia University                                                                                 | Turkey                                                        |
| Oppermann, Peter           | Computer-Scientist                                                     | Hamburg University of Technology                                                                      | Germany                                                       |
| oral, mert                 | Materials Science and Engineering                                      | Middle East Technical University                                                                      | Turkey                                                        |
| Orange, Didier             | Senior scientist, Ecohydrologist                                       | IRD                                                                                                   | France                                                        |
| Oras, Sven                 | PhD                                                                    | University of Tartu                                                                                   | Estonia                                                       |
| Orav-Kotta, Helen          | Associate Professor of Marine Biology                                  | Estonian Marine Institute, University of Tartu                                                        | Estonia                                                       |
| Ordaz, Isabel              |                                                                        | Max Planck Institute for Evolutionary Anthropology                                                    | Germany                                                       |
| Ordeix, Marc               | Coordinator of the CERM                                                | Center for the Study of Mediterranean Rivers -<br>University of Vic - Central University of Catalonia | Spain                                                         |
| Ordiz, Andres              | Researcher                                                             | Norwegian University of Life Sciences                                                                 | Spain                                                         |
| Orellana, Daniel           | Principal Professor                                                    | Universidad de Cuenca                                                                                 | Ecuador                                                       |
| Oren, Ram                  | Professor                                                              | Duke University                                                                                       | United States of America (the)                                |
| Orenstein, Daniel          | Associate Professor, Social Ecology                                    | Technion - Israel Institute of Technology                                                             | Israel                                                        |
| Oriolo, Sebastian          | Researcher, Earth Sciences                                             | National Scientific and Technical Research Council                                                    | Argentina                                                     |
| Orizaola, German           | Senior Researcher, Biologist                                           | University of Oviedo                                                                                  | Spain                                                         |
| Orkpeh, Uterdzua           | Plant Genetic Conservation                                             | National Horticultural Research Institute                                                             | Nigeria                                                       |
| Orlikowska, Ewa            | PhD Student Conservation Biology                                       | Swedish University of Agricultural Sciences                                                           | Sweden                                                        |
| Ormeno, Elena              | Research Scientist                                                     | CNRS                                                                                                  | France                                                        |

|                             |                                                                                                 |                                                                 |                                                            |
|-----------------------------|-------------------------------------------------------------------------------------------------|-----------------------------------------------------------------|------------------------------------------------------------|
| Ormerod, Steve              | Professor of Ecology                                                                            | Cardiff University                                              | United Kingdom of Great Britain and Northern Ireland (the) |
| Orozco-Segovia, Alma        | Researcher                                                                                      | Instituto de Ecología, Universidad Nacional Autónoma de México  | Mexico                                                     |
| Orr, Matthew                | Associate Professor, Biology                                                                    | Oregon State University Cascades Campus                         | United States of America (the)                             |
| Orsag, Matej                | Postdoctoral researcher / evapotranspiration monitoring of agricultural landscape               | Global Change Research Institute CAS                            | Czech Republic (the)                                       |
| Ortega, Enrique             | Researcher                                                                                      | University of Campinas                                          | Brazil                                                     |
| Ortega, Fernando            | Postdoctoral - Ecology                                                                          | University of Jaén                                              | Spain                                                      |
| Ortega, Zaida               | Postdoctoral Fellow / Ethology                                                                  | Universidade Federal de Mato Grosso do Sul                      | Brazil                                                     |
| Ortega-Perez, Fernando      | Researcher and full time professor, Health Sciences                                             | Universidad San Francisco de Quito                              | Ecuador                                                    |
| Ortega-Recalde, Oscar       | PhD student Epigenetics and Developmental Biology                                               | University of Otago                                             | New Zealand                                                |
| Ortego, Joaquin             | Científico Titular                                                                              | Estación Biológica de Doñana (EBD-CSIC)                         | Spain                                                      |
| Orth, Donald                | Fisheries and Aquatic Sciences                                                                  | Virginia Tech                                                   | United States of America (the)                             |
| Ortinez, Abraham            | Researcher air quality and Climate change                                                       | Instituto nacional de ecología y cambio climático               | Mexico                                                     |
| Ortiz, Santiago             | Professor Plant Sciences                                                                        | Universidade de Santiago de Compostela                          | Spain                                                      |
| Ortiz, Martin               | Lasers Applications                                                                             | Centro de Investigaciones en Optica, A.C.                       | Mexico                                                     |
| Ortiz Partida, Jose Pablo   | Climate and Water Scientist                                                                     | Union of Concerned Scientists                                   | United States of America (the)                             |
| Ortiz-Rodríguez, Ivan A.    | PhD student- Data Science                                                                       | Scuola Normale Superiore                                        | Italy                                                      |
| Ortman, Tove                | PhD student                                                                                     | Swedish university of Agricultural Sciences                     | Sweden                                                     |
| Ortuno Crespo, Guillermo    | PhD candidate                                                                                   | Duke University                                                 | United States of America (the)                             |
| Osborne, Matthew            | Research Fellow, Behavioural Science                                                            | Stockholm Environment Institute                                 | Sweden                                                     |
| Osborne, Michael            | Preseident, International Union of History and Philosophy of Science and Technology (2020-2021) | Oregon State University                                         | United States of America (the)                             |
| Osei-Owusu, Yaw             | Conservation Scientist                                                                          | Conservation Alliance International                             | Ghana                                                      |
| Osemwegie, Isimemen         | Senior Researcher, West African Biodiversity & Ecosystem Services (WABES)                       | Center for Development Research, University of Bonn             | Germany                                                    |
| Osenberg, Craig W.          | Professor                                                                                       | University of Georgia                                           | United States of America (the)                             |
| Oshant Hawkins, Trica       | Conservation Education / Conservation Biology                                                   | Desert Laboratory at Tumamoc Hill                               | United States of America (the)                             |
| Osiejuk, Tomasz             | Professor of biology                                                                            | Adam Mickiewicz University                                      | Poland                                                     |
| Oskarsson, Patrik           | Researcher                                                                                      | Dept of Rural and Urban Development                             | Sweden                                                     |
| Osman, Suhuur               | PhD/Chemistry                                                                                   |                                                                 | United Kingdom of Great Britain and Northern Ireland (the) |
| Osofsky, Steven             | Professor, Wildlife Health & Health Policy                                                      | Cornell University                                              | United States of America (the)                             |
| Osorio-Aravena, Juan Carlos | Researcher                                                                                      | Universidad Austral de Chile                                    | Chile                                                      |
| Osorno-Covarrubias, Javier  | Profesor, Geography                                                                             | Instituto de Geografía, Universidad Nacional Autónoma de México | Mexico                                                     |
| Ospina-Alvarez, Natalia     | Research Scientist (Environmental Sciences)                                                     | Catalan Institute for Water Research (ICRA)                     | Spain                                                      |
| Ossenkopf-Okada, Volker     | Lecturer/Astrophysics                                                                           | Universität zu Köln                                             | Germany                                                    |
| Ossing, Franz               | Dipl.Meteorologist, retired, former head of GFZ PR Unit                                         | GFZ German research Centre for Geosciences                      | Germany                                                    |
| Ossola, Alessandro          | Honorary Research Fellow                                                                        | University of Melbourne                                         | Australia                                                  |

|                         |                                                     |                                                                        |                                                            |
|-------------------------|-----------------------------------------------------|------------------------------------------------------------------------|------------------------------------------------------------|
| Öst, Markus             | University Lecturer                                 | Åbo Akademi University                                                 | Finland                                                    |
| Ostlie, Dale            | Emeritus Professor of Physics                       | Weber State University                                                 | United States of America (the)                             |
| Ostonen, Ivika          | Senior Researcher, Landscape Ecology                | University of Tartu                                                    | Estonia                                                    |
| Oswald, Wyatt           | Professor of Science                                | Emerson College                                                        | United States of America (the)                             |
| Oswald, Jessica         | Postdoctoral Researcher                             | University of Florida                                                  | United States of America (the)                             |
| Otero, Jaime            | Associate professor                                 | Universidad Politécnica de Madrid                                      | Spain                                                      |
| Otero, Rodrigo A.       | Researcher in vertebrate paleontology               | Universidad de Chile                                                   | Chile                                                      |
| Otero, Olga             | Full Professor, Evolution & Environment             | Université de Poitiers                                                 | France                                                     |
| Oteros-Rozas, Elisa     | PhD Sustainability Science                          | University of Vic                                                      | Spain                                                      |
| OTHMEN, RIADH           | POSTDOC                                             | CNRS Institut Neel                                                     | France                                                     |
| Otley, Tim              | Director Renewables- BSc MSc DMS                    | Suez                                                                   | United Kingdom of Great Britain and Northern Ireland (the) |
| Otruba, Paul            | Exec. Director Environmental Research               | Envroneers                                                             | United States of America (the)                             |
| Ottelin, Juudit         | Postdoc                                             | Aalto University                                                       | Finland                                                    |
| Otti, Oliver            | Evolutionary biologist                              |                                                                        | Germany                                                    |
| Ottlé, Catherine        | Senior Scientist, Hydrology and Remote Sensing      | CNRS                                                                   | France                                                     |
| Ottley, Katrin          | Health science                                      | University of Otago                                                    | New Zealand                                                |
| Otto, Sarah             | Professor                                           | University of British Columbia                                         | Canada                                                     |
| Otto, Jana              | Research Associate                                  | PH Ludwigsburg, University of Education                                | Germany                                                    |
| Otto, Katharina         | Planetary Scientist                                 | German Aerospace Center (DLR)                                          | Germany                                                    |
| Otto, Christopher       | Postdoctoral Researcher, Geologist                  | German Research Centre for Geosciences, GFZ Potsdam                    | Germany                                                    |
| Otto, Felix             | Post-doc in physics                                 | Friedrich Schiller University Jena                                     | Germany                                                    |
| Otto, Alexandra         | Research assistant                                  | University of Regensburg                                               | Germany                                                    |
| Otuu, Dr Chidiebere     | Lecturers and Public Health/Environmental Biologist | Federal University Oye-Ekiti, Ekiti State                              | Nigeria                                                    |
| Ou, Suzanne             | PhD                                                 | Stanford University                                                    | Singapore                                                  |
| Ouayjan, Adib           | Temporary Lecturer and Research Assistant           | Université de Lorraine                                                 | France                                                     |
| Ouboter, Paul           | Director, ecologist                                 | Institute for Neotropical Wildlife and Environmental Studies (NeoWild) | Suriname                                                   |
| Oudar, Thomas           | Postdoctoral researcher                             | CNRM/Météo-France                                                      | France                                                     |
| OUDE-EGBERINK, ISABELLE | Social science                                      | University of the Sunshine Coast                                       | Australia                                                  |
| Oudin, Ludovic          | Lecturer in Hydrology                               | Sorbonne University, UMR7619 METIS Paris                               | France                                                     |
| Oudman, Thomas          | Ecologist                                           | University of St Andrews                                               | United Kingdom of Great Britain and Northern Ireland (the) |
| Ouellet, J.D.           | Biologist MSc                                       | UQAR                                                                   | Canada                                                     |
| Ough dealy, Helen       | PhD candidate School of Science                     | AUT Auckland University of Technology                                  | New Zealand                                                |
| Ouillon, Sylvain        | Senior scientist                                    | French National Research Institute for Sustainable Development         | France                                                     |
| Oulton, Tate            | Research Assistant, Infection Biology               | London School of Hygiene & Tropical Medicine                           | United Kingdom of Great Britain and Northern Ireland (the) |
| Oulu, Martin            | Human Ecologist                                     | University of Nairobi                                                  | Kenya                                                      |
| OUTREMAN, Yannick       | Professor in Ecology                                | Agrocampus Ouest                                                       | France                                                     |

|                             |                                                                                  |                                                              |                                                            |
|-----------------------------|----------------------------------------------------------------------------------|--------------------------------------------------------------|------------------------------------------------------------|
| Outrequin, Clément          | PhD student in Environmental Geosciences/Isotopic Geochemistry                   | AMU                                                          | France                                                     |
| Ouvrard, Pierre             | Dr. Ing. / Entomology                                                            | UCL                                                          | France                                                     |
| Ouwehand, Janne             | postdoctoral researcher Animal Ecology                                           | University of Groningen                                      | Netherlands (the)                                          |
| Ovando, Norberto            | Profesor Licenciado en Ciencias Naturales                                        | Asociación de Parques Nacionales                             | Argentina                                                  |
| Overbeck, Gerhard           | Professor, Dept. of Botany                                                       | Universidade Federal do Rio Grande do Sul                    | Brazil                                                     |
| Overland, Benjamin          | Masters Student in Biological Sciences                                           | Swansea University                                           | United Kingdom of Great Britain and Northern Ireland (the) |
| Overman, Han                | Environmental Consultant                                                         | Former Post-doc SUNY-ESF (USA)                               | Guyana                                                     |
| Owen, Chris                 | PhD Student, Genetics                                                            | University College London                                    | United Kingdom of Great Britain and Northern Ireland (the) |
| Owen, Candice               | Lecturer in Entomology                                                           | Rhodes University                                            | South Africa                                               |
| Owens, Hannah               | Postdoc, Biology                                                                 | University of Copenhagen                                     | Denmark                                                    |
| Owens, Christopher          | Doctoral candidate, public health                                                | University of New South Wales                                | Australia                                                  |
| Owsianny, Paweł M.          | Hydrobiologist, specialist in environmental protection and ecosystem functioning | Nadnotecki Institute UAM in Piła, Adam Mickiewicz University | Poland                                                     |
| Oxarango, Laurent           | Professor                                                                        | IGE / Université Grenoble Alpes                              | France                                                     |
| Oxenford, Hazel             | Professor of Marine Ecology and Fisheries                                        | University of the West Indies                                | Barbados                                                   |
| Oyediji, Olubukola Tolulope | Research Fellow                                                                  | Forestry Research Institute of Nigeria                       | Nigeria                                                    |
| Özbagci, Burak              | Biology - Scientific Assistant                                                   | RWTH Aachen, Germany                                         | Germany                                                    |
| Özdemir, İbrahim            | Professor of Environmental Ethics                                                | Uskudar University and Clark university (Visiting Scholar).  | Turkey                                                     |
| Ozinga, Wim                 | Researcher vegetation ecology                                                    | Wageningen University and Research                           | Netherlands (the)                                          |
| Ozpolat, Duygu              | Scientist, Principal Investigator                                                | Marine Biological Laboratory                                 | United States of America (the)                             |
| Öztürk, Selda               | Assistant Professor, Sustainability Studies/Biologist                            | Cappadocia University                                        | Turkey                                                     |
| P. A. Ramos, Telton         | Biologist                                                                        | Instituto Peixes da Caatinga                                 | Brazil                                                     |
| P. de Sá, Fábio             | PhD Candidate in Zoology                                                         | São Paulo State University                                   | Brazil                                                     |
| P.F. Trindade, Diego        | PhD Student                                                                      | University of Tartu                                          | Estonia                                                    |
| Pablo, RAGUET               | étudiant en pédologie                                                            | AgroParisTech                                                | France                                                     |
| Pacheco, Gustavo            | Reesearch Technician / Enviromental Engineering                                  | Universidad de Cuenca                                        | Ecuador                                                    |
| Pacheco, Luis               | Professor and Researcher                                                         | Universidad Mayor de San Andrés                              | Bolivia (Plurinational State of)                           |
| Pacheco-Portilla, Gustavo   | Environmental Engineering                                                        | Universidad de Cuenca                                        | Ecuador                                                    |
| Pacheco-Torgal, F.          | Principal Investigator - Civil Engineering                                       | University of Minho                                          | Portugal                                                   |
| Paciência, Filipa           | PhD student                                                                      | German Primate Center                                        | Germany                                                    |
| Paço, Teresa                | Professor                                                                        | School of Agriculture, University of Lisbon                  | Portugal                                                   |
| Paddon, Nigel               | BSc Chemistry                                                                    |                                                              | United Kingdom of Great Britain and Northern Ireland (the) |
| Padella, Franco             | Senior scientist, material science                                               | ENEA, retired                                                | Italy                                                      |
| Padial, Andre               | Professor Ecology / Data analysis in Ecology                                     | Universidade Federal do Paraná                               | Brazil                                                     |
| Padilha, Danira             | Postdoctoral fellow                                                              | Universidade Federal de Goiás                                | Brazil                                                     |
| Padovesi Fonseca, Claudia   | Professor                                                                        | University of Brasilia                                       | Brazil                                                     |
| Paetkau, David              | President, Molecular Ecology                                                     | Wildlife Genetics International Inc.                         | Canada                                                     |



|                               |                                                    |                                                              |                                                            |
|-------------------------------|----------------------------------------------------|--------------------------------------------------------------|------------------------------------------------------------|
| Páez, Vivian                  | Ecology Professor                                  | Instituto de Biología, Universidad de Antioquia              | Colombia                                                   |
| Páez de la Cadena, Francisco  | Professor                                          | Universidad de La Rioja                                      | Spain                                                      |
| Páez-Vacas, Mónica            | Evolutionary Ecology and Conservation Genetics     | Jambatu Center for Amphibian Research and Conservation       | Ecuador                                                    |
| Paez-Varas, Claudia           | MSc in Integrated Studies in Land and Food Systems | University of British Columbia                               | Canada                                                     |
| Pag, Felix                    |                                                    | University of Kassel                                         | Germany                                                    |
| Pagani, Laurent               | Astrophysicist                                     | Observatoire de Paris & CNRS                                 | France                                                     |
| Pagano, Daniel Juan           | Full professor                                     | Federal University of Santa Catarina                         | Brazil                                                     |
| PAGANO, MARCELA               | Biologist                                          |                                                              | Brazil                                                     |
| Paganucci de Queiroz, Luciano | Full Professor in Botany                           | Universidade Estadual de Feira de Santana                    | Brazil                                                     |
| Page, Frank                   | Professor of Sociology                             | University of Utahg                                          | United States of America (the)                             |
| Page, Stephen                 | Veterinary Clinical Pharmacologist                 | Advanced Veterinary Therapeutics                             | Australia                                                  |
| Page, David                   | Population Geneticist, Disease Pathology - PhD     | University of Tasmania                                       | Australia                                                  |
| Page, Jay                     | Earth Science (Geology)                            | Retired                                                      | Canada                                                     |
| Pagella, Tim                  | Lecturer/Researcher Agroforestry                   | Bangor University                                            | United Kingdom of Great Britain and Northern Ireland (the) |
| Pagès, Jordi                  | Postdoctoral fellow in Ecology                     | University of Barcelona                                      | Spain                                                      |
| Paget, Nicolas                | Researcher                                         | CIRAD                                                        | France                                                     |
| Pagoto, Amerigo               | Postdoctoral Fellow in biomedical sciences         | Erasmus Medical Center                                       | Netherlands (the)                                          |
| Pai, Shriya                   | PhD student in Physics                             | University of Colorado Boulder                               | United States of America (the)                             |
| Paige, Ken N                  | Professor Evolution and Ecology                    | University of Illinois                                       | United States of America (the)                             |
| Paill, Wolfgang               | Head of National History Museum Graz, Biologist    | Universal Museum Joanneum GmbH                               | Austria                                                    |
| Paingankar, Mandar            | Assistant Professor                                | Government science College gadchiroli                        | India                                                      |
| Painter, Luke                 | Ecologist, Instructor, Researcher                  | Dept. of Fisheries and Wildlife, Oregon State University     | United States of America (the)                             |
| Paisley, Cherer               | Veterinary surgeon                                 | Murdoch University                                           | Australia                                                  |
| Pajares Moreno, Silvia        | Associate resercher in Aquatic Microbial Ecology   | National Autonomous University of Mexico                     | Mexico                                                     |
| Pajdak-Stós, Agnieszka        | Microbial ecologist                                | Institute of Environmental Sciences, Jagiellonian University | Poland                                                     |
| Pajot, François               | Astrophysicist                                     | CNRS                                                         | France                                                     |
| Pal, Rupali                   | Research Associate                                 | Centre de sciences humaines                                  | India                                                      |
| Palá-Paúl, Jesús              | Professor - Botany                                 | Universidad Complutense de Madrid                            | Spain                                                      |
| Palacín, Creu                 | Associate Professor                                | University of Barcelona                                      | Spain                                                      |
| Palacio, Sara                 |                                                    | IPE-CSIC                                                     | Spain                                                      |
| palacios, carmen              | associate professor                                |                                                              | France                                                     |
| Palacios, Rocio               | General Coordinator                                | Andean Cat Alliance                                          | Argentina                                                  |
| Palanchon, Marie              | Veterinarian                                       |                                                              | France                                                     |
| Palanica, Adam                | Behavioral Scientist                               | Klick Health                                                 | Canada                                                     |
| Palau Salvador, Guillermo     | Head of the Rural and Agrifood Department          | Technical University of Valencia                             | Spain                                                      |
| Palen, Stacy                  | Full Professor, Physics                            | Weber State University                                       | United States of America (the)                             |
| Palen, Wendy J.               | Professor of Biology                               | Simon Fraser University                                      | Canada                                                     |

|                                   |                                                   |                                                                                                                                   |                                                            |
|-----------------------------------|---------------------------------------------------|-----------------------------------------------------------------------------------------------------------------------------------|------------------------------------------------------------|
| Palenicek, Tomas                  | Psychiatrist and researcher                       | National Institute of Mental Health, Czech republic                                                                               | Czech Republic (the)                                       |
| Palero, Ferran                    | Postdoc                                           | University of Lodz                                                                                                                | Poland                                                     |
| Pales Espinosa, Emmanuelle        | Research Associate Professor                      | Stony brook University                                                                                                            | United States of America (the)                             |
| Paletou, Frédéric                 | full professor, astrophysics                      | Université Paul Sabatier, Observatoire Midi-Pyrénées, Toulouse                                                                    | France                                                     |
| Palla, Kaitlin                    | Botany Lecturer                                   | University of Tennessee - Knoxville                                                                                               | United States of America (the)                             |
| Palle, Angélique                  | Research Fellow / Geography                       | IRSEM                                                                                                                             | France                                                     |
| Pallett, John                     | Environmental Practitioner                        | Southern African Institute for Environmental Assessment                                                                           | Namibia                                                    |
| Pallewatte, Prof Nirmalie         | Professor                                         | University of Colombo                                                                                                             | Sri Lanka                                                  |
| Palma, Ana                        | Post doctoral research fellow                     | James Cook Univesity                                                                                                              | Australia                                                  |
| Palme, Ulrika                     | Senior Lecturer Environmental Systems Analysis    | Technology Management and Economics                                                                                               | Sweden                                                     |
| Palmeirim, Jorge                  | Associate Professor, Ecology                      | University of Lisbon, Faculty of Sciences                                                                                         | Portugal                                                   |
| Palmer, Meredith                  | Postdoctoral Researcher                           | Princeton University                                                                                                              | United States of America (the)                             |
| Palmer, Tracy                     | Professor of Microbiology                         | Newcastle University                                                                                                              | United Kingdom of Great Britain and Northern Ireland (the) |
| Palmer, Laura                     | Research Assistant                                | University of St Andrews                                                                                                          | United Kingdom of Great Britain and Northern Ireland (the) |
| Palmer, Gregory                   | Lecturer of Environmental Science                 | Loyola University Chicago                                                                                                         | United States of America (the)                             |
| Palmer, Jason                     | Energy and Climate Change Researcher              | Mr                                                                                                                                | United Kingdom of Great Britain and Northern Ireland (the) |
| Palmer, Jonathan                  | Research Scientist                                | University of New South Wales                                                                                                     | Australia                                                  |
| Palmer, Anthony                   | Principal Scientist                               | Agricultural research council                                                                                                     | South Africa                                               |
| Palo, R.Thomas                    | Professor animal ecology                          | Swedish University of Agricultural Sciences                                                                                       | Sweden                                                     |
| Palomares, Salvador               | Professor                                         | UASLP                                                                                                                             | Mexico                                                     |
| Palomera Laforga, Isabel          | Marine biologie - retired                         | CSIC                                                                                                                              | Spain                                                      |
| Palomino Gaviria, Angela Patricia | MSc Oceanography                                  | Universitat de Barcelona                                                                                                          | Spain                                                      |
| Palomo, Ignacio                   | Postdoctoral Researcher in Sustainability Science | CNRS                                                                                                                              | France                                                     |
| Palsson, Gisli                    | Archaeologist                                     | The Institute of Archaeology, Iceland                                                                                             | United States of America (the)                             |
| Pálsson, Arnar                    | Professor, genetics                               | University of Iceland                                                                                                             | Iceland                                                    |
| Pálsson, Finnur                   | Project manager in glaciology                     | Institute of earth sciences, University of Iceland                                                                                | Iceland                                                    |
| Palstra, Robert-Jan               | Senior Scientist/Molecular Biology                | ErasmusMC                                                                                                                         | Netherlands (the)                                          |
| PALU, Marie                       | research ingeneer                                 | Cognitive Neuroimaging unit                                                                                                       | France                                                     |
| Palzer, Robert                    | Adjunct Professor of Chemistry (retired)          | Southern Oregon University                                                                                                        | United States of America (the)                             |
| Palzer-Khomenko, Markus           | Geology MSc.                                      | University of Vienna/Scientists for Future                                                                                        | Austria                                                    |
| Pampuch, Timo                     | PhD student Landscape Ecology                     | University Greifswald                                                                                                             | Germany                                                    |
| Pananceau, Marc                   | Assistant professor                               | Paris-Sud & Paris-Saclay University                                                                                               | France                                                     |
| Panazio, Cristiano                | Assistant Professor                               | University of São Paulo                                                                                                           | Brazil                                                     |
| Panchev, Peter                    | Microbiologist                                    |                                                                                                                                   | France                                                     |
| Pandi-Perumal, Seithikurippu R.   | Distinguished Professor or Research               | Saveetha Medical College and Hospitals, Saveetha Institute of Medical and Technical Sciences, Saveetha University, Chennai, India | India                                                      |

|                                  |                                                                     |                                                                                   |                                |
|----------------------------------|---------------------------------------------------------------------|-----------------------------------------------------------------------------------|--------------------------------|
| Panek, Piotr                     | chief specialist/bioindication, water quality monitoring            | Chief Inspectorate for Environmental Protection                                   | Poland                         |
| Panfil, Steven                   | Nature Conservation and Restoration                                 | Conservation International                                                        | United States of America (the) |
| Pang, Yi Heng                    | Postgraduate student                                                | Malaysian Primatological Society                                                  | Malaysia                       |
| Panikkar, Bindu                  | Assistant Professor of Environmental Studies                        | University of Vermont                                                             | United States of America (the) |
| Panisi, Martina                  | PhD candidate                                                       | Lisbon University                                                                 | Portugal                       |
| PANITZ, ERIC                     |                                                                     | Ferris State University                                                           | United States of America (the) |
| Pannard, Alexandrine             | Assistant Professor / Ecology                                       | University of Rennes                                                              | France                         |
| Pannebakker, Bart                | Assistant Professor in Evolutionary Biology                         | Laboratory of Genetics - Wageningen University                                    | Netherlands (the)              |
| Pannunzio, Valeria               | PhD researcher                                                      | Delft University of Technology                                                    | Netherlands (the)              |
| Pansanel, Jérôme                 | Research engineer in computer science                               | CNRS                                                                              | France                         |
| Pante, Dr. Gregor                | Researcher, Meteorologist                                           | Karlsruhe Institute of Technology                                                 | Germany                        |
| Panthou, Jeremy                  | Researcher, Climatology/hydrology                                   | Institute of Environmental Geosciences (IGE),<br>Grenoble-Alpes University        | France                         |
| Pantle, Iris                     | Lecturer (external) in Technical Acoustics                          | Karlsruhe Institute of Technology - Institute for<br>Thermal Turbomachinery (ITS) | Germany                        |
| Panwar, Rajat                    | Associate Professor, Corporate Responsibility and<br>Sustainability | Oregon State University                                                           | United States of America (the) |
| Panzer, Dr., Wolfram             | Leitender Oberarzt                                                  | Klinikum Sindelfingen-Böblingen                                                   | Germany                        |
| Paolini van Helfteren, Sebastian | Researcher                                                          | Wageningen University / Pachamama Raymi                                           | Netherlands (the)              |
| Paolucci, Lucas                  | Pos-doc Fellow / Ecologist                                          | Federal University of Lavras                                                      | Brazil                         |
| Papa, Roberto                    | Agricultural Genetics                                               | Università Politecnica delle Marche                                               | Italy                          |
| Papa, Maria Nicolina             | Associate Professor                                                 | Civil Engineering Department of Salerno University                                | Italy                          |
| Papa, Fabrice                    | Directeur de Recherche                                              | LEGOS, Institut de Recherche pour le Developpement,<br>IRD                        | France                         |
| Papadaki, Lydia                  | Researcher                                                          | ICRE8                                                                             | Greece                         |
| Papadimitriou, Filothei          | Chemist                                                             |                                                                                   | Greece                         |
| papadopoulos, isabelle           | researcher                                                          | NMU                                                                               | South Africa                   |
| Papadopoulou, Marina             | PhD candidate / Theoretical Biology                                 | University of Groningen                                                           | Netherlands (the)              |
| Papageorgiou, Danai              | PhD student                                                         | Max Planck Institute of Animal Behavior                                           | Greece                         |
| Papagiannakos, Dimitris          | Scientific consultant of a Member of the Hellenic<br>Parliament     | Hellenic Parliament                                                               | Greece                         |
| Papaloizos, Michael              | health scientist                                                    | Center for Hand Surgery                                                           | Switzerland                    |
| Papazzoni, Cesare Andrea         | Palaeontologist                                                     | Università di Modena e Reggio Emilia                                              | Italy                          |
| Pape, Ellen                      | Deep-sea biologist   Post-doctoral scientist                        | Ghent University                                                                  | Belgium                        |
| Papke, Armin                     | Physician                                                           | Practice                                                                          | Germany                        |
| Papp, Gergely                    | Engineer                                                            | EMBL                                                                              | France                         |
| Papp, Viktor                     | Senior lecturer / Mycology                                          | Szent István University, Department of Botany                                     | Hungary                        |
| Paquet, Paul                     | Adjunct Professor & Senior Scientist                                | University of Victoria & Raincoast Conservation<br>Foundation                     | Canada                         |
| Paquette, Cindy                  | PhD Candidate, biological sciences                                  | Université du Québec à Montréal                                                   | Canada                         |
| Paradise, Christopher            | Professor of Biology                                                | Davidson College                                                                  | United States of America (the) |
| Parajuli, Sujun                  | Remote Sensing Scientist                                            | KBR                                                                               | United States of America (the) |

|                         |                                                                         |                                                           |                                                            |
|-------------------------|-------------------------------------------------------------------------|-----------------------------------------------------------|------------------------------------------------------------|
| Paranjpe, Arvin         | Technology Development Manager                                          | Oregon Health & Science University                        | United States of America (the)                             |
| Paravan, Dejan          | chief innovation officer                                                | GEN-I                                                     | Slovenia                                                   |
| Pardini, Renata         | Conservation Science                                                    | Institute of Bioscience - University of São Paulo         | Brazil                                                     |
| Pardo, Mercedes         |                                                                         | University Carlos III of Madrid                           | Spain                                                      |
| Pardo, Deborah          | Doctor in population ecology                                            | Independant                                               | France                                                     |
| Pardonnet, Sylvia       | Biology                                                                 | LBBE - CNRS - UCBL                                        | France                                                     |
| Paredes, Xoán M.        | Geography and Planning (MA, MPhil)                                      | IDG                                                       | Portugal                                                   |
| Parejo, Deseada         | Researcher                                                              | University of Extremadura                                 | Spain                                                      |
| Parent, Christine       | Associate Professor                                                     | University of Idaho                                       | United States of America (the)                             |
| PARENT, Philippe        | Reseacher                                                               | Cnrs                                                      | France                                                     |
| Parente, Jociery        | President                                                               | Fundação Mamíferos Aquáticos                              | Brazil                                                     |
| parera, anibal fernando | Biologist ex-Coordinator The Alliance of the Grasslands (BirdLife Int.) | BirdLife International                                    | Argentina                                                  |
| Pares-Sierra, Alejandro | Research Scientist, Oceanography                                        | Centro de investigación y estudios Superiores de Ensenada | Mexico                                                     |
| Parey, Sylvie           | Research Engineer climate change impact, energy, extreme events         |                                                           | France                                                     |
| Pargana, Katerina       | Postdoc                                                                 | Ghet University                                           | Belgium                                                    |
| Parigi, Fabio           | Clean energy                                                            |                                                           | Italy                                                      |
| Parihar, Anuj           | Project Scientist                                                       | Meghalaya Climate Change Centre                           | India                                                      |
| Paris, Margot           | Postdoc in evolutionary biology                                         | University of Fribourg                                    | Switzerland                                                |
| Paris, Mathilde         | Researcher in Biology                                                   | CNRS, Institut de Genomique Fonctionnelle de Lyon         | France                                                     |
| Paris, Josephin         | Postdoctoral Researcher in Evolutionary Genomics                        | University of Exeter                                      | United Kingdom of Great Britain and Northern Ireland (the) |
| Parisi, Monica          | Retired Environmental Scientist / Graduate Student of Ecology           | University of California, Davis                           | United States of America (the)                             |
| Parizot, Etienne        | Dr. Prof. in Astrophysics                                               | University of Paris / Astroparticle and Cosmology         | France                                                     |
| Park, Taejin            | PhD Student                                                             | Boston University                                         | United States of America (the)                             |
| Parker, Thomas          | Research Fellow                                                         | University of Stirling                                    | United Kingdom of Great Britain and Northern Ireland (the) |
| Parker, Darren J.       | Postdoctoral fellow / Evolutionary Biology                              | University of Lausanne                                    | Switzerland                                                |
| Parker, Kenneth         | Environmental Science/Forest Ecosystem Management                       | Bird/Land Ecosystem Management                            | Japan                                                      |
| Parker, Michael         | Professor of Biology                                                    | Southern Oregon University                                | United States of America (the)                             |
| Parker, Eugene          | Professor Emeritus/Geography and Environmental Systems                  | University of Maryland Baltimore County                   | United States of America (the)                             |
| Parmentier, Eric        | Fuu Professor Biology                                                   | University of Liege                                       | Belgium                                                    |
| Parncutt, Jacqui        | BSc, MPH                                                                | University of Melbourne                                   | Australia                                                  |
| Parncutt, Richard       | Professor for Systematic Musicology                                     | University of Graz                                        | Austria                                                    |
| Paro, Cláudia Moreno    | Biologist - PhD Conservation and Research                               |                                                           | Brazil                                                     |
| Parodi, Mauro           | Full Professor - Mathematical methods forma engineers                   | Università of Genova                                      | Italy                                                      |
| Parra, Navarrete        | Environmental biology                                                   | Universidad de Chile                                      | Chile                                                      |

|                             |                                                          |                                                              |                                                            |
|-----------------------------|----------------------------------------------------------|--------------------------------------------------------------|------------------------------------------------------------|
| Parra, Gema                 | Tenured lecturer                                         | UNIVERSITY OF JAÉN                                           | Spain                                                      |
| Parra Bueno, Paula          | Research Scientist                                       | Max Planck Florida Institute                                 | United States of America (the)                             |
| parsons, daniel             | Prof Sedimentology                                       | Univ Of Hull                                                 | United Kingdom of Great Britain and Northern Ireland (the) |
| Parsons, Martin             | CEng CEnv FIAgrE                                         | Institution of Agricultural Engineers                        | United Kingdom of Great Britain and Northern Ireland (the) |
| Parsons, E.C.M.             | Conservation & Environmental Science                     | University of Glasgow                                        | United Kingdom of Great Britain and Northern Ireland (the) |
| Parsons, David              | Carnivore Conservation Biologist                         | The Rewilding Institute                                      | United States of America (the)                             |
| Pärtel, Meelis              | Professor of botany                                      | University of Tartu                                          | Estonia                                                    |
| Partida-Martinez, Laila P.  | Professor                                                | CINVESTAV - Irapuato                                         | Mexico                                                     |
| Parvin, Shahnaj             | Post doctoral fellow                                     | Southern Cross University                                    | Australia                                                  |
| Pasanen, Miia               | PhD Candidate, Plant Pathology                           | University of Helsinki                                       | Finland                                                    |
| Pasanen-Mortensen, Marianne | Postdoctoral researcher in Animal ecology                | Stockholm University                                         | Sweden                                                     |
| Pascal, Mathilde            | Epidemiologist                                           |                                                              | France                                                     |
| Pascal, Thiébeau            | Agronome                                                 | INRA                                                         | France                                                     |
| Pascale, Dietrich-Ragon     | Sociologue                                               | INED                                                         | France                                                     |
| Pascale, Celine-Marie       | Sociology                                                | American University                                          | United States of America (the)                             |
| Paschke, Mark               | Professor of Restoration Ecology                         | Colorado State University                                    | United States of America (the)                             |
| Pascoe, Gary                | Consultant. PhD in Environmental toxicology              | Pascoe Environmental Consulting                              | United States of America (the)                             |
| Pascon, Renata              | University professor                                     | Federal University of São Paulo                              | Brazil                                                     |
| Pascual, Miguel             | Researcher                                               | IPEEC-CENPAT-CONICET                                         | Argentina                                                  |
| Pascual Roman, Eduardo      | Senior Anesthesiologist                                  | Hospital Denia                                               | Spain                                                      |
| Pashay Ahi, Ehsan           | Researcher / biology                                     | Uppsala University                                           | Sweden                                                     |
| Pasotti, Francesca          | Post doc Fellow                                          | Ghent University                                             | Belgium                                                    |
| Pasquet, Sylvain            |                                                          | Institut de Physique du Globe de Paris - CNRS                | France                                                     |
| Pasquini, Lorena            | Research Fellow, Climate Change Adaptation               | University of Cape Town                                      | South Africa                                               |
| Pass, Thomas                | Postdoctoral Neuroscientist                              | University of Cologne                                        | Germany                                                    |
| Passaler, Linnea            | Doctor & Surgeon                                         | –                                                            | Italy                                                      |
| Passmore, Rachel            | Professional Teaching Fellow                             | University of Auckland                                       | New Zealand                                                |
| Pastana, Murilo             | Post Doctorate fellow                                    | Museu de Zoologia da Universidade de São Paulo - USP         | Brazil                                                     |
| Pasteau, Palmyre            | Master student - Ecology                                 | Université Paris Saclay                                      | France                                                     |
| Pastor, Nina                | Professor                                                | Universidad Autonoma del Estado de Morelos                   | Mexico                                                     |
| Pastor, Amandine            | Researcher                                               | Faculdade de Ciencias de Lisboa (CE3C)                       | Portugal                                                   |
| Pastor, Marina              | Postdoctoral researcher in marine ecology                | CSIC                                                         | Spain                                                      |
| Pastor, Manuel              | Associate professor, Head pharmacoinformatics laboratory | University Pompeu Fabra                                      | Spain                                                      |
| Pastore, José Floriano      | Botany                                                   | Universidade Federal de Santa Catarina                       | Brazil                                                     |
| Pastorino, Guido            | Researcher                                               | Museo Argentino de Ciencias Naturales "Bernardino Rivadavia" | Argentina                                                  |
| Pásztor, Liz                | associate professor                                      | MTA Centre for Ecological Research                           | Hungary                                                    |

|                         |                                                                     |                                                                                                                         |                                                            |
|-------------------------|---------------------------------------------------------------------|-------------------------------------------------------------------------------------------------------------------------|------------------------------------------------------------|
| Patarra, Rita           | Aquaculture                                                         | Expolab and cE3c - Centre for Ecology, Evolution and Environmental Changes                                              | Portugal                                                   |
| Pate PhD, MSc, David W. | Director                                                            | CASIL                                                                                                                   | Canada                                                     |
| Patel, Vibhuti          | PhD Researcher                                                      | University of Sheffield                                                                                                 | United Kingdom of Great Britain and Northern Ireland (the) |
| Patel, Neem             | PhD Candidate in Microbiology                                       | UC Berkeley                                                                                                             | United States of America (the)                             |
| Patelli, Niccolò        | PhD in Supply Chain Traceability                                    | University of Modena and Reggio Emilia                                                                                  | Italy                                                      |
| Patenković, Aleksandra  | Research Associate - Population genetics                            | Institute for Biological Research "Siniša Stanković" - National Institute of Republic of Serbia, University of Belgrade | Serbia                                                     |
| Paterno, Gustavo Brant  | Postdoctoral fellow                                                 | Universidade Federal do Rio Grande do Norte (UFRN)                                                                      | Brazil                                                     |
| Paternoster, Giulia     | PhD student in Epidemiology and Biostatistics                       | University of Zurich                                                                                                    | Switzerland                                                |
| Paterson, James         | University Teacher in Carbon Management                             | University of Edinburgh                                                                                                 | United Kingdom of Great Britain and Northern Ireland (the) |
| Patey, Tony             | Social Scientist                                                    | Independent                                                                                                             | United Kingdom of Great Britain and Northern Ireland (the) |
| Patience, Richard       | Petroleum Geochemist                                                | Albion Petroleum Geochemistry LLC                                                                                       | United States of America (the)                             |
| Patil, Pratik           | Researcher                                                          | International Institute for Applied Systems Analysis                                                                    | Austria                                                    |
| Patkó, Ferenc           | Zoológia - Ökológia kutatója , tanára                               | Kutatás - ZOOROYAL Egyesület ,                                                                                          | Romania                                                    |
| Patomäki, Heikki        | Professor of World Politics                                         | University of Helsinki                                                                                                  | Finland                                                    |
| Patrick, Michael        | Research Assistant                                                  | Eawag                                                                                                                   | Switzerland                                                |
| Patriksson, Michael     | Professor of applied mathematics                                    | Chalmers University of Technology                                                                                       | Sweden                                                     |
| Pattazhy, Sainudeen     | Scietist and Professor                                              | International University in Singapore                                                                                   | India                                                      |
| Patterson, David        | Professor Emeritus                                                  | University of Sydney, Australia.                                                                                        | Australia                                                  |
| Pattison, Zarah         | Lecturer in Environmental Sciences                                  | Newcastle University                                                                                                    | United Kingdom of Great Britain and Northern Ireland (the) |
| Patton, James L         | Professor Emeritus                                                  | Museum of Vertebrate Zoology, University of California, Berkeley                                                        | United States of America (the)                             |
| Patton, John            | Biotech Scientist                                                   | Dance Biopharm                                                                                                          | United States of America (the)                             |
| Patton, Austin          | Ph.D Candidate, Biology                                             | Washington State University                                                                                             | United States of America (the)                             |
| Patton, Nicholas        | PhD students                                                        | University of Queensland                                                                                                | Australia                                                  |
| Pätzig, Marlene         | Postdoc                                                             | Leibniz Centre for Agricultural Landscape Research (ZALF) e.V.                                                          | Germany                                                    |
| Pauchard, Anibal        | Professor in Ecology                                                | Universidad de Concepción                                                                                               | Chile                                                      |
| Paudel, Rashmi          | PhD Scholor                                                         | University of Konstanz                                                                                                  | Germany                                                    |
| paul, Josephat          | Environmental psychology                                            | University of Rwanda                                                                                                    | Rwanda                                                     |
| Paul, Maitry            | Doctoral Researcher                                                 | University of Helsinki, Finland                                                                                         | Finland                                                    |
| Paul, Bryan             | Postgraduate Student                                                | Jeffrey Sachs Center on Sustainability Development, Sunway University                                                   | Malaysia                                                   |
| Paul-Marie, GUINCHARD   | Ing Environnement                                                   |                                                                                                                         | France                                                     |
| Paulay, Gustav          | Professor                                                           | University of Florida                                                                                                   | United States of America (the)                             |
| Paule, BENIT            | PhD, IR (physiopathologie et thérapie des maladies mitochondriales) | INSERM U1141                                                                                                            | France                                                     |

|                             |                                                        |                                                                                                     |                                                            |
|-----------------------------|--------------------------------------------------------|-----------------------------------------------------------------------------------------------------|------------------------------------------------------------|
| Pauli, Harald               | plant ecologist                                        | GLORIA-Coordination, Austrian Academy of Sciences & BOKU University Vienna                          | Austria                                                    |
| Pauli, Natasha              | Lecturer, Environmental Geography                      | The University of Western Australia                                                                 | Australia                                                  |
| Paulick, Sven               | Scientist for Energy Technology                        | TU Dresden                                                                                          | Germany                                                    |
| Paulino-Afonso, Ana         | Postdoctoral Fellow, Astronomy and Astrophysics        | Centro de Astrofísica e Gravitação, Instituto Superior Técnico                                      | Portugal                                                   |
| Pausata, Francesco          | Professor in Climate Dynamics                          | UQAM                                                                                                | Canada                                                     |
| Pausch, Franziska           | Marine Biologist/PhD student                           | Alfred Wegener Institute, Helmholtz Center for Polar and Marine Research                            | Germany                                                    |
| Pauthenet, Etienne          | postdoctoral researcher                                | Laboratoire d'Océanographie et du Climat : Expérimentations et Approches Numériques (LOCEAN)        | France                                                     |
| Pauwels, Ine                | Aquatic Ecologist                                      | Research Institute for Nature and Forest, Belgium                                                   | Belgium                                                    |
| Pavanelli, Carla            | Researchers on fish taxonomy                           | Universidade Estadual de Maringa                                                                    | Brazil                                                     |
| Pave, Alain                 | emeritus professor                                     | Claude Bernard University (Lyon) and CNRS (France)                                                  | France                                                     |
| Pavia, Edgar                | Scientist                                              | CICESE                                                                                              | Mexico                                                     |
| Pavlaki, Maria              | Assistant Researcher                                   | Department of Biology and CESAM, University of Aveiro                                               | Portugal                                                   |
| Pavlek, Martina             | postdoc, Biology                                       | Rudjer Boskovic Institute                                                                           | Croatia                                                    |
| Pavlicev, Mihaela           | Professor, Evolutionary Biology                        | University of Vienna                                                                                | Austria                                                    |
| Pavlinec, Željko            | Molecular biologist                                    | Croatian Veterinary Institute, Zagreb // University of Zagreb, Faculty of Science                   | Croatia                                                    |
| Pavlushchick, Tatiana       | researcher, ornithologist                              | Scientific-practical Centre of the National Academy of Sciences of Belarus for Biological Resources | Belarus                                                    |
| Pavón Paneque, Altai Carlos | PhD student                                            | University of Seville                                                                               | Spain                                                      |
| Pavón-Jordán, Diego         | postdoctoral researcher                                | Norwegian Institute for Nature Research                                                             | Norway                                                     |
| Pawar, Sayali               | Research Assistant (GIS and Climate change)            | Swansea University                                                                                  | United Kingdom of Great Britain and Northern Ireland (the) |
| Pawelec, Alicja             | phD student - biology                                  | University of Warsaw                                                                                | Poland                                                     |
| Pawlikowski, Paweł          | assistant professor; vegetation ecology                | University of Warsaw, Faculty of Biology                                                            | Poland                                                     |
| Pawula, Florent             | PhD in Physics                                         | Université de Bordeaux                                                                              | France                                                     |
| Pay, James                  | PhD student                                            | University of Tasmania                                                                              | Australia                                                  |
| Payan, Sebastien            | Professor in Atmospheric Physics                       | Sorbonne Université                                                                                 | France                                                     |
| Payne, Richard              | Oceanographer Emeritus                                 | Woods Hole Oceanographic Institution                                                                | United States of America (the)                             |
| Payo-payo, Ana              | Theoretical Ecology Research Fellow                    | Doctor                                                                                              | United Kingdom of Great Britain and Northern Ireland (the) |
| PAYRASTRE, Bernard          | Professor                                              | University of Toulouse 3                                                                            | France                                                     |
| Payraudeau, Sylvain         | Professor in Hydrology                                 | National School for Water and Environmental Engineering - University of Strasbourg                  | France                                                     |
| Payri, Claude               | Senior scientist                                       | French Institut for research for development IRD                                                    | New Caledonia                                              |
| Paz, Claudia                | Postdoc researcher                                     | Sao Paulo State University                                                                          | Brazil                                                     |
| Paz-Vinas, Ivan             | Post-doc / Molecular Ecology and Conservation Genetics | Université de Toulouse, UMR 5174, Laboratoire Évolution et Diversité Biologique (EDB)               | France                                                     |

|                             |                                                                |                                                                                                                                                             |                                                            |
|-----------------------------|----------------------------------------------------------------|-------------------------------------------------------------------------------------------------------------------------------------------------------------|------------------------------------------------------------|
| Pazderkova, Marketa         | Researcher / Biophysics                                        | Charles University                                                                                                                                          | Czech Republic (the)                                       |
| Pe'er, Guy                  | Conservation Biologist                                         | German Centre for Integrative Biodiversity Research (iDiv) Halle-Jena-Leipzig, UFZ - Helmholtz Centre for Environmental Research, and University of Leipzig | Germany                                                    |
| Péan, Thibault              | PhD Candidate                                                  | Catalonia Institute for Energy Research IREC                                                                                                                | Spain                                                      |
| Pearcy, William             | biological oceanography                                        | Oregon State Univ.                                                                                                                                          | United States of America (the)                             |
| Pearse, William             | Assistant Professor of Biology                                 | Utah State University                                                                                                                                       | United States of America (the)                             |
| Pearson, Ben                | Geomorphologist                                                |                                                                                                                                                             | Australia                                                  |
| Pearson, Richard            | Emeritus Professor, Ecology                                    | James Cook Uni                                                                                                                                              | Australia                                                  |
| Pearson, David              | Professor, School of the Environment                           | Laurentian University                                                                                                                                       | Canada                                                     |
| Peaucelle, Marc             | Postdoctoral researcher in ecology and environment             | Ghent University                                                                                                                                            | Belgium                                                    |
| Pebsworth, Paula            | Primatology                                                    | The University of Texas San Antonio                                                                                                                         | United States of America (the)                             |
| Pecchio, Maydelin           | Infectious diseases                                            | Instituto de Ciencias Médicas                                                                                                                               | Panama                                                     |
| Peck, Mika                  | Senior Lecturer in Conservation Biology                        | University of Sussex                                                                                                                                        | United Kingdom of Great Britain and Northern Ireland (the) |
| Peckarsky, Barbara          | Emeritus Professor - Aquatic Ecology                           | University of Wisconsin Madison                                                                                                                             | United States of America (the)                             |
| Pecl, Greta                 | Director, Centre for Marine Socioecology                       | University of Tasmania                                                                                                                                      | Australia                                                  |
| Peco, Begoña                | Professor of Ecology                                           | Universidad Autonoma de Madrid                                                                                                                              | Spain                                                      |
| Pecquerie, Laure            | Researcher / Marine Ecology                                    | IRD                                                                                                                                                         | France                                                     |
| Pecqueur, David             | Microbial ecologist                                            | CNRS                                                                                                                                                        | France                                                     |
| Pecuchet, Laurene           | Postdoctoral researcher                                        |                                                                                                                                                             | Norway                                                     |
| Pedraza, Manuel             | Carcinologist                                                  |                                                                                                                                                             | Colombia                                                   |
| Pedraza Jiménez, Verónica   | PhD Biosciences and Agrifood Sciences with a research contract | IAS-CSIC                                                                                                                                                    | Spain                                                      |
| Pedrosa Harand, Andrea      | Associate Professor                                            | Universidade Federal de Pernambuco, Recife/PE                                                                                                               | Brazil                                                     |
| Pedroso-ROussado, Cristiano | Microbiology                                                   | Instituto Superior Técnico                                                                                                                                  | Portugal                                                   |
| Peel, Joanne                | PhD biology and health sciences                                | UAM                                                                                                                                                         | Mexico                                                     |
| Pegalajar Jurado, Antonio   | Postdoctoral Researcher                                        | Technical University of Denmark                                                                                                                             | Denmark                                                    |
| Pegoretti, Valentina        | PhD student in Molecular Neurobiology                          | University of Groningen                                                                                                                                     | Netherlands (the)                                          |
| Pei, Kurtis Jai-Chyi        | Professor/ Wildlife Ecology, Conservation and Management       | Institute of Wildlife Conservation, National Pingtung University of Science & Technology                                                                    | Taiwan                                                     |
| Peinetti, Raul              | Associated professor                                           | Universidad Nacional de La Pampa                                                                                                                            | Argentina                                                  |
| Peixoto, Ariane Luna        | Pesquisador Afiliado                                           | Instituto de Pesquisas Jardim Botânico do Rio de Janeiro                                                                                                    | Brazil                                                     |
| Peixoto, Paulo Enrique      | Professor                                                      | Universidade Federal de Minas Gerais                                                                                                                        | Brazil                                                     |
| Peixoto, Luiz               | PosDoc                                                         | MZUSP                                                                                                                                                       | Brazil                                                     |
| Pejchar, Liba               | Associate Professor                                            | Colorado State University                                                                                                                                   | United States of America (the)                             |
| Pekar, Stephen              |                                                                | Queens College, City University of NY                                                                                                                       | United States of America (the)                             |
| Pekrun, Katja               | Senior Scientist, Gene Therapy                                 | Stanford School of Medicine                                                                                                                                 | United States of America (the)                             |
| Pekrun, Carola              | Prof Agronomy and Vice Rector of the University                | Nuertingen-Geislingen University (NGU)                                                                                                                      | Germany                                                    |
| Pelé, Anne-Laure            | Optical physics                                                | CNRS                                                                                                                                                        | France                                                     |
| Pelé, Marie                 | Animal behaviour / Cognition                                   | Université de Strasbourg                                                                                                                                    | France                                                     |



|                             |                                                                      |                                                              |                                                            |
|-----------------------------|----------------------------------------------------------------------|--------------------------------------------------------------|------------------------------------------------------------|
| peleg, gili                 | Lecturer                                                             | HIT Israel                                                   | Israel                                                     |
| Peleg, Ofer                 | C.S.O Bioinformatics and Molecular Biology                           | Genaphora Ltd                                                | Israel                                                     |
| Pelejero, Carles            | ICREA Research Professor                                             | Institut de Ciències del Mar, CSIC                           | Spain                                                      |
| Pelet, Serge                | Lecturer Biology                                                     | University of Lausanne                                       | Switzerland                                                |
| Pelicice, Fernando          | Professor                                                            | Universidade Federal do Tocantins                            | Brazil                                                     |
| Pellarin, Thierry           | Researcher in hydrology                                              | Institute of Environmental Geosciences (IGE), CNRS           | France                                                     |
| Pellaud, Francine           | Pr.Dr. Science education - Education for sustainable development     | HEP FR                                                       | Switzerland                                                |
| Pellegrini, Lorenzo         | Associate Professor, Economics of Environment and Development        | Erasmus University Rotterdam                                 | Netherlands (the)                                          |
| Pellegrini Masini, Giuseppe | Associate Professor in environmental social science                  | Norwegian University of Science and Technology NTNU          | Norway                                                     |
| Pellens, Roseli             | Macroecologist                                                       | Museum National d'Histoire naturelle                         | France                                                     |
| Pelletier, Nathan           | Assistant Professor                                                  | University of British Columbia                               | Canada                                                     |
| Pellicciari, Simone         | Research Assistant                                                   | Newcastle University                                         | United Kingdom of Great Britain and Northern Ireland (the) |
| Pellizari, Vivian           | Associate Professor                                                  | University of Sao Paulo                                      | Brazil                                                     |
| Pellizari, Vivian Helena    | Associate Professor                                                  | Oceanographic Institute. University of Sao Paulo             | Brazil                                                     |
| Pellkofer, Sarah            | PhD plant ecology & soil science                                     | University of Zurich                                         | Switzerland                                                |
| Pels, Christophe            | Research Technician                                                  | UCLouvain                                                    | Belgium                                                    |
| Pelser, Pieter              | Associate Professor in Systematic Botany                             | University of Canterbury                                     | New Zealand                                                |
| Peltier, Carly S.           | PhD candidate                                                        | Columbia University                                          | United States of America (the)                             |
| Peluso, Livia               | PhD Candidate in Ecology and Evolution                               | Universidad Austral de Chile                                 | Chile                                                      |
| Pena-Ramirez, Yuri Jorge    | Tropical Tree Biotechnology                                          | El Colegio de la Frontera Sur                                | Mexico                                                     |
| Peñaloza, Diego             | Researcher / Industrial Ecology                                      | IVL Swedish Environmental Research Institute                 | Sweden                                                     |
| Peñaranda, Diego            | PhD student in Ecology and Evolutionary Biology                      | Universidad de Chile                                         | Chile                                                      |
| Peñaranda, Victor           | Doctoral student                                                     | Universidad Nacional de Colombia                             | Colombia                                                   |
| Peñas, Francisco J.         | Postdoc Researcher                                                   | Environmental Hydraulics Institute - University of Cantabria | Spain                                                      |
| Peñas, Julio                | Professor of Botany and Biogeography                                 | University of Granada                                        | Spain                                                      |
| Pende, Marko                | PhD Student/Neuroscience                                             |                                                              | Austria                                                    |
| Pende, Nika                 | Postdoc; Prokaryotic Cell Biology                                    | Institut Pasteur                                             | France                                                     |
| Pender, Robyn               | Building physicist                                                   | Historic England                                             | United Kingdom of Great Britain and Northern Ireland (the) |
| Pendleton, Steve            | Physics                                                              | Warwickshire County Council                                  | United Kingdom of Great Britain and Northern Ireland (the) |
| Pengelley, David            | Professor Emeritus, Mathematics                                      | New Mexico State University                                  | United States of America (the)                             |
| PENGUE, WALTER ALBERTO      | ECOLOGICAL ECONOMICS                                                 | GEPAMA UNIVERSITY OF BUENOS AIRES                            | Argentina                                                  |
| Penha, Thales               | Geographer/Ms in Remote Sensing/ PhD CAndidate in Physical Geography | University of São Paulo                                      | Brazil                                                     |
| Penha, Jerry                | Professor of Ecology                                                 | Universidade Federal de Mato Grosso                          | Brazil                                                     |

|                                                 |                                                 |                                                                                         |                                                            |
|-------------------------------------------------|-------------------------------------------------|-----------------------------------------------------------------------------------------|------------------------------------------------------------|
| Peniche, Gabriela                               | PhD student                                     | University of Edinburgh                                                                 | United Kingdom of Great Britain and Northern Ireland (the) |
| Penido, Iago                                    | Phd Student                                     | Universidade Estadual de Maringá                                                        | Brazil                                                     |
| Penn, Jill                                      | Assistant Professor of Biology                  | Georgia Gwinnett College                                                                | United States of America (the)                             |
| Penner, Amber                                   | Flood Forecasting Hydrologist                   |                                                                                         | Canada                                                     |
| Penner, Joyce                                   | Professor of Atmospheric Science                | University of Michigan                                                                  | United States of America (the)                             |
| Penner, Johannes                                | Senior Scientist / Biology                      | University of Freiburg                                                                  | Germany                                                    |
| Penning, Ellis                                  | Senior researcher aquatic ecology               | Deltares                                                                                | Netherlands (the)                                          |
| Penning de Vries, Frits                         | emeritus                                        | formerly: International Water Management Institute                                      | Netherlands (the)                                          |
| Penone, Caterina                                | Postdoctoral researcher - Ecology               | University of Bern                                                                      | Switzerland                                                |
| Penot, Eric                                     | researcher                                      | CIRAD UMR Innovation                                                                    | France                                                     |
| Penteriani, Vincenzo                            | permanent researcher, animal ecology            | Spanish Council for Scientific Research (CSIC)                                          | Spain                                                      |
| Penuelas, Josep                                 | Research Professor in Global Ecology            | CSIC-CREAF                                                                              | Spain                                                      |
| Peper, Eva                                      | PhD candidate in MRI research                   | Academic Medical Center (AMC)                                                           | Netherlands (the)                                          |
| Pepin, Pierre                                   | Senior scientist                                | Memorial University                                                                     | Canada                                                     |
| Pequeno, Pedro                                  | Ecology                                         | Federal University of Roraima                                                           | Brazil                                                     |
| Peralta, Luciano                                | Doctorando en ciencias biológicas               | Universidad Nacional de Mar del Plata                                                   | Argentina                                                  |
| Peralta, Guadalupe                              | Postdoctoral Fellow                             | University of Canterbury                                                                | New Zealand                                                |
| Peralta, Ariane                                 | Assistant Professor of Microbial Ecology        | East Carolina University                                                                | United States of America (the)                             |
| Peralta Sánchez, Juan Manuel                    | Postdoc                                         | University of Granada                                                                   | Spain                                                      |
| Percival, Anthony                               | Graduate Student, Horticulture                  | Colorado State University                                                               | United States of America (the)                             |
| Perdereau, Olivier                              | Researcher in Cosmology                         | IN2P3/CNRS                                                                              | France                                                     |
| Perea Paizal, Julia                             | PhD Candidate                                   | Imperial College London                                                                 | United Kingdom of Great Britain and Northern Ireland (the) |
| pereira, luis                                   | Professor Emeritus, Water Resources and Climate | universidade de Lisboa                                                                  | Portugal                                                   |
| Pereira, Joana                                  | Assistant Researcher                            | CESAM, University of Aveiro                                                             | Portugal                                                   |
| Pereira, Adriana                                | environmental engineer                          | Aveiro University                                                                       | Portugal                                                   |
| Pereira, Mariana                                | PhD candidate                                   | Donders Institute for Brain and Cognition                                               | Netherlands (the)                                          |
| Pereira, Paulo                                  | Professor/Environmental Sciences                | Mykolas Romeris Univeristy                                                              | Lithuania                                                  |
| Pereira, Luís Filipe                            | PhD Student in Biology                          | CIBIO                                                                                   | Portugal                                                   |
| Pereira, Francisco                              | Professor, AI and Transport                     | Technical University of Denmark (DTU)                                                   | Denmark                                                    |
| Pereira, Luis                                   | Prof. Emeritus, agriculture water management    | University of Lisbon                                                                    | Portugal                                                   |
| Pereira Coutinho, Miguel                        | Sociologist                                     | Universidade Algarve                                                                    | São Tomé and Príncipe                                      |
| Pereira, PhD, Fulbright Scholar, Prof. Dr. Tony | Science & Engineering                           | UCLA                                                                                    | United States of America (the)                             |
| Perelberg, Amir                                 | Manager, Ecological & Landscape Surveys Unit    | Open Landscape Institute, The Steinhardt Museum of Natural History, Tel Aviv University | Israel                                                     |
| PEREÑA, JAIME                                   | BIOLOGY PHD                                     | AULA DEL MAR DE MÁLAGA                                                                  | Spain                                                      |
| Perenon, Louis                                  | Cosmology                                       | University of the Western Cape                                                          | South Africa                                               |
| Peres, Carlos                                   | Professor of Ecology                            | University of East Anglia                                                               | United Kingdom of Great Britain and Northern Ireland (the) |
| PERES, CARLOS                                   | Ecology                                         | Instituto Juruá                                                                         | Brazil                                                     |

|                                 |                                                                                               |                                                                |                                |
|---------------------------------|-----------------------------------------------------------------------------------------------|----------------------------------------------------------------|--------------------------------|
| Peretti, Alfredo                | Associate Professor, Zoologist                                                                | Universidad Nacional de Córdoba                                | Argentina                      |
| Pereyra, Martín O.              | Dr.                                                                                           | Instituto de Biología Subtropical-CONICET                      | Argentina                      |
| Perez, Denise                   | Marine Biologist                                                                              |                                                                | Northern Mariana Islands (the) |
| Perez, Paul                     | MD, PhD in Epidemiology                                                                       | Bordeaux University Hospital                                   | France                         |
| Perez, Ilan                     | Research associate in Fisheries                                                               | Agrocampus Ouest Rennes                                        | France                         |
| Perez, Maria Eugenia            | Chemistry Professor                                                                           | CURE - Udelar                                                  | Uruguay                        |
| Perez, Analia                   | Biologist/ Science Teacher                                                                    | Craighouse School                                              | Chile                          |
| Perez, Grégoire                 | Ecologist                                                                                     |                                                                | France                         |
| Pérez, Martín                   | PhD student                                                                                   | Universidad de Burgos                                          | Spain                          |
| Pérez, Diego                    | Proffesor, Ecology and Environmental Pollution                                                | Universidad Nacional Andres bello                              | Chile                          |
| Perez Baliero, Maria del Carmen | Biologist                                                                                     | Water Supply Company                                           | Uruguay                        |
| Perez Bissaro, Cassiana         | Biologist                                                                                     | Prefeitura Municipal de Ribeirão Preto, SP                     | Brazil                         |
| Pérez Brunius, Paula            | Physical oceanography                                                                         | Center of Scientific Research and Higher Education of Ensenada | Mexico                         |
| Perez Campo, Flor María         | Assistant Professor                                                                           | Universidad de Cantabria                                       | Spain                          |
| Pérez Farinós, Gema             | Researcher                                                                                    | Centro de Investigaciones Biológicas, CSIC                     | Spain                          |
| Perez Gamote, Ringo             | Senior Research Associate                                                                     | Hochschule Luzern                                              | Switzerland                    |
| Pérez Hernández, Cisteil Xinum  | Postdoctoral researcher                                                                       | National Autonomous University of Mexico                       | Mexico                         |
| Perez Vega, Catherine           | Doctoral Candidate in Biology, Interdisciplinary research - Light Pollution and Ecophysiology | Leibniz Institute of Freshwater Ecology and Inland Fisheries   | Germany                        |
| Pérez Viñuela, Javier           | Postdoctoral researcher / limnologist                                                         | University of the basque country                               | Spain                          |
| Perez-Calpe, AV                 | PhD student                                                                                   | University of the Basque Country                               | Spain                          |
| Pérez-Contreras, Tomás          | Researcher                                                                                    | University of Granada                                          | Spain                          |
| Pérez-García, Juan Manuel       | Postdoctoral researcher in Ecology                                                            | Universidad Miguel Hernández                                   | Spain                          |
| Perez-Garijo, Ainhoa            | Research Associate                                                                            | The Rockefeller University                                     | United States of America (the) |
| Pérez-Luque, Antonio Jesús      | Researcher / Ecology                                                                          | University of Granada                                          | Spain                          |
| Pérez-Martínez, Carmen          | ecologist                                                                                     | University of Granada                                          | Spain                          |
| Pérez-Méndez, Néstor            | Researcher                                                                                    | IRNAD                                                          | Spain                          |
| Pérez-Ortega, Sergio            | Senior scientist                                                                              | Real Jardín Botánico (CSIC)                                    | Spain                          |
| Pérez-Pérez, Antonio            | Scientific                                                                                    | Hospital Universitario Virgen Macarena                         | Spain                          |
| Pérez-Quintero, Juan Carlos     | Biologist. Professor of Zoology, Faculty of Experimental Sciences                             | Department of Integrated Sciences, University of Huelva        | Spain                          |
| Perez-Rovira, Patricia          | Botanist                                                                                      | Vaersa - Generalitat Valenciana                                | Spain                          |
| Pérez-Salicrup, Diego R         | Researcher Ecology of Forest Reseources                                                       | Universidad Nacional Autónoma de México                        | Mexico                         |
| Pérez-Stuardo, Diego            | PhD student                                                                                   | Universidad Mayor                                              | Chile                          |
| Pérez-Tris, Javier              | Professor - Zoology                                                                           | Complutense University of Madrid                               | Spain                          |
| Perezgasga, Lucia               | Molecular microbiology                                                                        | National Autonomous University of Mexico (UNAM)                | Mexico                         |
| PERICARD, Jean-Marie            | VETERINARIAN Doctor in Veterinary Medicine                                                    | VETO FAUNE                                                     | France                         |
| Perier, Aurélie                 | PhD / biology                                                                                 |                                                                | France                         |
| Perilli, Alessia                | Postdoc in Physics                                                                            | Tel Aviv University                                            | Israel                         |
| Perin, Rodrigo                  | Scientist                                                                                     | EPFL                                                           | Switzerland                    |

|                     |                                                                     |                                                                                   |                                                            |
|---------------------|---------------------------------------------------------------------|-----------------------------------------------------------------------------------|------------------------------------------------------------|
| Perina, Fernando    | Postdoctoral Researcher                                             | São Paulo State University - UNESP                                                | Brazil                                                     |
| Périquet, Stéphanie | Resident Scientist-Behaviour and spatial ecology                    | Ongava Research Centre                                                            | Namibia                                                    |
| Perissinotto, Renzo | Honorary Professor, Marine Science                                  | Nelson Mandela University                                                         | South Africa                                               |
| Perkins-Taylor, Ian | Fish and Wildlife Biologist                                         | U.S. Fish and Wildlife Service                                                    | United States of America (the)                             |
| Pernetta, Angelo    | Principal Lecturer in Environmental Biology                         | University of Brighton                                                            | United Kingdom of Great Britain and Northern Ireland (the) |
| Perona, John        | Professor of Environmental Biochemistry                             | Portland State University                                                         | United States of America (the)                             |
| Perosa, Bruno       | Professor and Researcher on Environmental and Agriculture Economics | Federal University of Uberlandia                                                  | Brazil                                                     |
| Perrault, Sébastien |                                                                     | ENPC Ponts Paris Tech                                                             | France                                                     |
| perrier, christian  | former Director of laboratory / Astrophysicist                      | OSUG - Univ. Grenoble Alpes                                                       | France                                                     |
| perrier, charles    | Researcher                                                          | CNRS                                                                              | France                                                     |
| Perrier, Charles    | Geneticist                                                          | Inrae                                                                             | France                                                     |
| Perrin, Abigail     | Postdoctoral Research Scientist                                     | The Francis Crick Institute                                                       | United Kingdom of Great Britain and Northern Ireland (the) |
| Perrin, Charles     | Hydrology                                                           | Irstea                                                                            | France                                                     |
| Perrin, Guy         | Astronomer                                                          | Paris Observatory                                                                 | France                                                     |
| Perrin, Nicolas     | Professor, Ecology & Evolution                                      | University of Lausanne                                                            | Switzerland                                                |
| Perrin, Coline      | Researcher                                                          | INRA                                                                              | France                                                     |
| Perro, Michelle     | MD                                                                  | GMOScience.org                                                                    | United States of America (the)                             |
| Perry, Holly        | Lecturer in Medical Laboratory Sciences                             | Auckland University of Technology                                                 | New Zealand                                                |
| Perry, George       | Professor, Environmental Science                                    | University of Auckland                                                            | New Zealand                                                |
| Perry, Allison      |                                                                     | Oceana                                                                            | Spain                                                      |
| Perry, JIm          | Professor                                                           | University of Minnesota                                                           | United States of America (the)                             |
| Perry, David        | Professor (emeritus)                                                | Oregon State University                                                           | United States of America (the)                             |
| Perry, Edward       | aquatic biologist                                                   | US Fish and Wildlife Service                                                      | United States of America (the)                             |
| Persico, Andrea     | Biologist                                                           | Pro Natura Ticino                                                                 | Switzerland                                                |
| Person, Renaud      | Modeling engineer in marine biogeochemistry                         | IRD                                                                               | France                                                     |
| Persson, Tomas      | Associate Professor                                                 | Dalarna University (Högskolan Dalarna), School of Technology and Business Studies | Sweden                                                     |
| pertoldi, cino      | professor in conservation genetics                                  | Aalborg University                                                                | Denmark                                                    |
| Pertoldi, Cino      | Professor in Conservation Biology                                   | Aalborg University                                                                | Denmark                                                    |
| Perumal, Balu       | Head of Conservation                                                | Malaysian Nature Society                                                          | Malaysia                                                   |
| Pesce, Diego        | Postdoc                                                             | University of Wageningen                                                          | Netherlands (the)                                          |
| Pesce, Stéphane     | Senior Researcher in Aquatic Microbial Ecology and Ecotoxicology    | Irstea                                                                            | France                                                     |
| Pescott, O.L.       | Plant Ecologist                                                     | Centre for Ecology & Hydrology                                                    | United Kingdom of Great Britain and Northern Ireland (the) |
| Pessato, Anais      | PhD candidate                                                       | CIE - Deakin university                                                           | Australia                                                  |
| Pessi, Igor         | Postdoctoral Researcher, Microbial Ecology                          | University of Helsinki                                                            | Finland                                                    |
| Pestana, João       | Researcher ( Ecotoxicology)                                         | University of Aveiro & CESAM                                                      | Portugal                                                   |
| Petean, Flavia      | PhD student in Systematics and Evolution                            | Universidade Federal do Rio Grande do Norte                                       | Brazil                                                     |

|                       |                                                     |                                                                                 |                                                            |
|-----------------------|-----------------------------------------------------|---------------------------------------------------------------------------------|------------------------------------------------------------|
| Petean Bove, Claudia  | Professor                                           | Museu Nacional, Universidade Federal do Rio de Janeiro                          | Brazil                                                     |
| Peter, Jakob          | PhD                                                 | EWI                                                                             | Germany                                                    |
| Peter, Craig          | Associate Professor, Department of Botany           | Rhodes University                                                               | South Africa                                               |
| Peter, Francisc       | Professor                                           | University Politehnica of Timisoara                                             | Romania                                                    |
| Peterman, Randall     | Professor Emeritus                                  | School of Resource and Environmental Management, Simon Fraser University        | Canada                                                     |
| Petermann, Holger     | Geologist                                           |                                                                                 | United States of America (the)                             |
| Petermann, Jana       | Associate Professor, Biosciences                    | University of Salzburg                                                          | Austria                                                    |
| Peters, Daniel        | Post-doctoral Research Associate/Synthetic Biology  |                                                                                 | United Kingdom of Great Britain and Northern Ireland (the) |
| Peters, Stefan        |                                                     | UniSA-NBE                                                                       | Australia                                                  |
| Peters, Greg          | Professor of Quantitative Sustainability Assessment | Chalmers University of Technology                                               | Sweden                                                     |
| Peters, Kevin         | Ph.D. Materials Science Engineer, also Entrepreneur | Northwestern University, also Terrestrial Ecosystems Research Associates        | United States of America (the)                             |
| Peters, Mark          | PA-C Emeritus                                       |                                                                                 | United States of America (the)                             |
| Peters, Szarah        | Medecin                                             | Universität Heidelberg (zi Mannheim)                                            | Germany                                                    |
| Peters, Lena          |                                                     | Kiel University                                                                 | Germany                                                    |
| Peters, Richard L.    | Postdoc                                             | Ghent University                                                                | Belgium                                                    |
| Peters, Judith        | Professor in physics                                | Université Grenoble Alpes                                                       | France                                                     |
| Peters, Jens          | MSCA Research Fellow                                | University of Alcalá                                                            | Spain                                                      |
| Petersen, Hauke       | Researcher                                          | Freie Universität Berlin                                                        | Germany                                                    |
| Petersen, Mareike     | Researcher                                          | Museum für Naturkunde Berlin                                                    | Germany                                                    |
| Petersen, Juliane     | Scientist                                           | Helmholtz-Zentrum hereon GmbH                                                   | Germany                                                    |
| Petersen, Stefan      | Scientific research Assistant and Project Manager   | TU Berlin                                                                       | Germany                                                    |
| Peterson, Christopher | Professor - Aquatic Ecology                         | Loyola University Chicago                                                       | United States of America (the)                             |
| Peterson, Anna        | Conservation Biologist                              | University of Minnesota                                                         | United States of America (the)                             |
| Petit, Sophie         | Associate Professor of Wildlife Ecology             | University of South Australia                                                   | Australia                                                  |
| Petit, Laurent        | Researcher in Neuroscience                          | CNRS                                                                            | France                                                     |
| Petit, Jean Robert    | Emeritus scientist /Glaciology                      | IGE-univ Grenoble Alpes                                                         | France                                                     |
| Petit Bon, Matteo     | PhD candidate                                       | The University Centre in Svalbard (UNIS), The Arctic University of Norway (UiT) | Norway                                                     |
| Petkov, Nikolai       | Ornithology                                         | Bulgarian Society for the Protection of Birds                                   | Bulgaria                                                   |
| Petracca, Lisanne     | Conservation Scientist                              | Panthera                                                                        | United States of America (the)                             |
| PETRENKO, Anne        | Professor - Oceanographer                           | MIO                                                                             | France                                                     |
| PETRETTO, Marie       | Conservation Biologist                              | Marwell Wildlife                                                                | United Kingdom of Great Britain and Northern Ireland (the) |
| Petridou, Maria       | PhD student                                         | University of Ioannina                                                          | Greece                                                     |
| Petrocelli, Antonella | Researcher                                          | Institute for Water Research - CNR                                              | Italy                                                      |
| Petrou, Katherina     | Senior Lecturer                                     | University of Technology Sydney                                                 | Australia                                                  |
| Petrucci, Romina      | Astronomer                                          | IA-UNAM                                                                         | Mexico                                                     |

|                           |                                                                 |                                                          |                                                            |
|---------------------------|-----------------------------------------------------------------|----------------------------------------------------------|------------------------------------------------------------|
| Petrucchio, Enrico        | Principal Scientist                                             | Johnson Matthey                                          | United Kingdom of Great Britain and Northern Ireland (the) |
| Petrucio, Mauricio        | Senhor Professor                                                | Federal University of Santa Catarina - UFSC/Brazil       | Brazil                                                     |
| Petry, Cláudia            | Professor                                                       | Universidade de Passo Fundo - UPF                        | Brazil                                                     |
| Petry, Ana                | Professor                                                       | Federal University of Rio de Janeiro                     | Brazil                                                     |
| Pettersen, Amanda         | Postdoctoral fellow                                             | Lund University                                          | Sweden                                                     |
| Pettersson, Katarina      | Researcher                                                      | Swedish University of Agricultural Sciences              | Sweden                                                     |
| Pettex, Emeline           | Marine ecologist                                                | La Rochelle Université                                   | France                                                     |
| Pettorelli, Nathalie      | Senior Research Fellow                                          | Institute of Zoology                                     | United Kingdom of Great Britain and Northern Ireland (the) |
| Petty, Ross               | Professor Emeritus, Pediatrics                                  | University of British Columbia                           | Canada                                                     |
| Petz, Marcus              | Social Science and Public Policy                                | University of Jyväskylä                                  | Finland                                                    |
| Petzold, Dirk             | Behavioural Biologist                                           | Stiftung Artenschutz                                     | Germany                                                    |
| Peugeot, Christophe       | Researcher, Hydrologist                                         | French National Research Institute for Development (IRD) | France                                                     |
| Peyré Tartaruga, Iván G.  | Researcher and professor in Economic and Social Geography       | University of Porto                                      | Portugal                                                   |
| Peyré-Tartaruga, Leonardo | Associate Professor                                             | Universidade Federal do Rio Grande do Sul                | Brazil                                                     |
| Peyton Jones, Meg         | PhD student (Cell Biology)                                      | University of Edinburgh                                  | United Kingdom of Great Britain and Northern Ireland (the) |
| Pezaro, Nadav             | Postdoctoral Fellow                                             | University of Haifa                                      | South Africa                                               |
| Pfaff, Claas-Thido        | Ecology                                                         | Special Botany And Functional Biodiversity               | Germany                                                    |
| Pfannerstill, Eva         | Doctoral researcher                                             |                                                          | Germany                                                    |
| Pfeiffer, Mirjam          |                                                                 | Senckenberg Biodiversity and Climate Research Centre     | Germany                                                    |
| Pfeiffer, Sven            | PhD Candidate in Aerospace Engineering                          | TU Delft                                                 | Netherlands (the)                                          |
| Pfeilsticker, Klaus       | Environmental Physics                                           | University of Heidelberg                                 | Germany                                                    |
| Pfenniger, Daniel         | Professor of Astrophysics                                       | University of Geneva                                     | Switzerland                                                |
| Pfreundt, Ulrike          | Postdoc Marine Sciences                                         | ETH Zürich                                               | Switzerland                                                |
| Phakisi, Tshepo           | Environmental Health Practitioner - Climate & Health Researcher | University of Cape Town                                  | South Africa                                               |
| PHAM, Jean-Louis          | Senior Scientist                                                | Institut de recherche pour le développement              | France                                                     |
| Pham-Truffert, Myriam     | Research Scientist                                              | CDE, University of Bern                                  | Switzerland                                                |
| Philip, Justine           | PhD Ecosystem Management and Environmental History              | Museum Victoria (Associate)                              | Australia                                                  |
| Philipp, Sonja            | Adjunct Professor in Geology                                    | University of Göttingen                                  | Germany                                                    |
| Philipp, Madison          | Biology MSc student                                             | Memorial university of Newfoundland                      | Canada                                                     |
| Philippe, Boltenhagen     | Physics                                                         | CNRS                                                     | France                                                     |
| Philippe, Durand          | Enseignant chercheur                                            | Agroparistech                                            | France                                                     |
| Philippe, Gontier         | Software engineer working on animal health and welfare          | INRA                                                     | France                                                     |
| Philippe, Charlotte       | PhD in Biology                                                  | KULeuven                                                 | Belgium                                                    |

|                          |                                                                                                                      |                                                                                                                                                                  |                                                            |
|--------------------------|----------------------------------------------------------------------------------------------------------------------|------------------------------------------------------------------------------------------------------------------------------------------------------------------|------------------------------------------------------------|
| Philips, Mari-Anne       | PhD Biomedicine                                                                                                      | University of Tartu                                                                                                                                              | Estonia                                                    |
| Phillipp, Rhodri         | Ecologist                                                                                                            |                                                                                                                                                                  | United Kingdom of Great Britain and Northern Ireland (the) |
| Phillips, John G.        | Postdoctoral Fellow in Biological Sciences                                                                           | University of Idaho                                                                                                                                              | United States of America (the)                             |
| Phillips, Molly          | Natural History Collections Professional                                                                             | Florida Museum of Natural History                                                                                                                                | United States of America (the)                             |
| Phillips, Helen          | Post Doc                                                                                                             | German Center for Integrative Biodiversity Research (iDiv) Halle-Jena-Leipzig                                                                                    | Germany                                                    |
| Phillips, Amy            | Medical Doctor                                                                                                       | NHS                                                                                                                                                              | United Kingdom of Great Britain and Northern Ireland (the) |
| Phillips, Craig          | Senior Scientist                                                                                                     | AgResearch                                                                                                                                                       | New Zealand                                                |
| Phillips, Helen          | Associate Professor and Physical Oceanographer                                                                       | University of Tasmania                                                                                                                                           | Australia                                                  |
| Phillis, Anastasia       | Physicist, currently masters student production and management engineering                                           | Technical university of Crete                                                                                                                                    | Greece                                                     |
| Phillis, Nili            | Ecology                                                                                                              | Retired                                                                                                                                                          | Greece                                                     |
| Phillis, Yannis          | Professor Emeritus                                                                                                   | Technical University of Crete                                                                                                                                    | Greece                                                     |
| Philp, Alex              | Senior Research Fellow                                                                                               | University of Montana                                                                                                                                            | United States of America (the)                             |
| Philpot, William         | Professor (Remote Sensing)                                                                                           | Civil & Environmental Engineering, Cornell University                                                                                                            | United States of America (the)                             |
| Phoma, Sandra            | PhD candidate in Marine Microbiology and Genomics                                                                    | University of Pretoria                                                                                                                                           | South Africa                                               |
| Piacentini, Rubén        | Researcher (Investigador Superior) and Honorary Professor in Atmospheric Physics, Solar Radiation and Climate Change | Institute of Physics Rosario (CONICET - National University of Rosario) and Faculty of Exact Sciences, Engineering and Surveying, National University of Rosario | Argentina                                                  |
| Piano, Valentina         | Group leader                                                                                                         | University of Cologne                                                                                                                                            | Germany                                                    |
| PIASECKI, Fabien         | Information and Communication Science                                                                                | Association Sciences Citoyennes                                                                                                                                  | France                                                     |
| Piątkowski, Jakub        | Research Assistant, Biology                                                                                          | Faculty of Biology, University of Warsaw                                                                                                                         | Poland                                                     |
| Piazzzi, Gaia            | Postdoctoral researcher / Hydrology                                                                                  | IRSTEA                                                                                                                                                           | France                                                     |
| Picanco, Ana             | PhD scholarship                                                                                                      | University of Azores                                                                                                                                             | Portugal                                                   |
| PICART PICOLO, Ariadna   | PhD molecular biology                                                                                                | Laboratoire Génome et Développement des Plantes (UMR5096: CNRS-UPVD)                                                                                             | Andorra                                                    |
| Picasso, Valentin        | Agroecology                                                                                                          | University of Wisconsin - Madison                                                                                                                                | United States of America (the)                             |
| Picazo, Felix            | Post-doctoral researcher in macroecology                                                                             | Nanjing Institute of Geography and Limnology                                                                                                                     | China                                                      |
| Piccardi, Philippe       | Ecology and Evolution                                                                                                | University of Lausanne                                                                                                                                           | Switzerland                                                |
| Piccardo, Paolo          | Professor Metallurgy                                                                                                 | University of Genoa                                                                                                                                              | Italy                                                      |
| Picchi, Malayka Samantha | Research Assistant in Applied Entomology                                                                             | Sant'Anna School of Advanced Studies                                                                                                                             | Italy                                                      |
| PICCIN, Luca             | phD student                                                                                                          | CIRAD                                                                                                                                                            | France                                                     |
| Picco, Lorenzo           | Assistant Professor - Fluvial Geomorphologist                                                                        | Dept. Land, Environment, Agriculture and Forestry - University of Padova                                                                                         | Italy                                                      |
| Pichevin, Laetitia       | marine geochemist                                                                                                    | University of Edinburgh                                                                                                                                          | United Kingdom of Great Britain and Northern Ireland (the) |
| Pichler, Arthur          | PhD candidate                                                                                                        | University of Vienna                                                                                                                                             | Austria                                                    |
| pichon, noémie           | PhD student - Ecology                                                                                                |                                                                                                                                                                  | Switzerland                                                |
| Pichot, Christian        | Researcher                                                                                                           | INRA                                                                                                                                                             | France                                                     |

|                          |                                                                                                         |                                                                                                  |                                                            |
|--------------------------|---------------------------------------------------------------------------------------------------------|--------------------------------------------------------------------------------------------------|------------------------------------------------------------|
| Pickard, Barbara         | Faculty fellow, NSF Center for Engineering Biomechanics and Faculty, Electrical and Systems Engineering | Washington University in St Louis                                                                | United States of America (the)                             |
| Pickering, Kim           | Associate Dean (Research), Division of Health, Engineering, Computing and Science                       | University of Waikato                                                                            | New Zealand                                                |
| Pickering, Nigel         | Reseach Associate Professor/Water Resoruces Engineer                                                    | Washington State University                                                                      | United States of America (the)                             |
| Pickett, Simon           | Ecologist                                                                                               | Bat Conservation Ireland                                                                         | Ireland                                                    |
| Pickett, Kate            | Professor of Epidemiology                                                                               | University of York                                                                               | United Kingdom of Great Britain and Northern Ireland (the) |
| Piclet, Jules            | Medical doctor                                                                                          | Aix marseille university                                                                         | France                                                     |
| Picó, Sara               | PhD Student                                                                                             | Centro Biologia Molecular Severo Ochoa                                                           | Spain                                                      |
| Picone, Christopher      | Ecology Professor                                                                                       | Fitchburg State University                                                                       | United States of America (the)                             |
| Pieczarka, Julio         | Full Professor / genetics                                                                               | Universidade Federal do Para                                                                     | Brazil                                                     |
| Piedade, Maria Teresa F. | Senior Researcher                                                                                       | Instituto Nacional de Pesquisas da Amazônia - INPA                                               | Brazil                                                     |
| Piek, Marjolein          |                                                                                                         | Skåne hospital, Lund                                                                             | Sweden                                                     |
| Piel, Tim                | Phd student                                                                                             | University of Amaterdam                                                                          | Netherlands (the)                                          |
| Piera, Jaume             | Tenured Scientist                                                                                       | Institute of Marine Sciences (ICM-CSIC)                                                          | Spain                                                      |
| Pierce, Benjamin         | Henry Salvatori Professor of Computer and Information Science                                           | University of Pennsylvania                                                                       | United States of America (the)                             |
| PIERCE, ELIN             | Wildlife Biologist/Ecology                                                                              | GOVT                                                                                             | United States of America (the)                             |
| PIERCE, Ph.D., ELIN      | Wildlife Biologist                                                                                      | GOVT                                                                                             | United States of America (the)                             |
| Pierotti, Raymond        | Biologist                                                                                               | University of Kansas                                                                             | United States of America (the)                             |
| Pierre-Henri, Fabre      | Associate Researcher in Zoology, Evolution and Ecology                                                  | Institut des Sciences de l'Evolution de Montpellier                                              | France                                                     |
| Piers, Kenneth           | Professor Emeritus, Chemistry                                                                           | Calvin University                                                                                | United States of America (the)                             |
| Piersma, Theunis         | Professor - Rudi Drent Chair in Global Flyway Ecology                                                   | University of Groningen and NIOZ Royal Netherlands Institute for Sea Research                    | Netherlands (the)                                          |
| Pierson, Donald          | Senior Research Scientist Limnology                                                                     | Uppsala University                                                                               | Sweden                                                     |
| Pieruschka, Roland       | Senior Scientist / Plant Sciences                                                                       | Forschungszentrum Jülich                                                                         | Germany                                                    |
| Pietras, Cynthia         | Psychology                                                                                              | Western Michigan University                                                                      | United States of America (the)                             |
| Pietroluongo, Guido      | Doctor of Veterinary Medicine, Conservationist                                                          | Archipelagos Institute of Marine Conservation                                                    | Italy                                                      |
| Pietsch, Katherina       | PhD                                                                                                     | University of Leipzig                                                                            | Germany                                                    |
| pigeau, benjamin         | Physics                                                                                                 | CNRS                                                                                             | France                                                     |
| Pignati, Marco           | PhD in Electrical Engineering                                                                           | Swiss Federal Institute of Technology                                                            | Switzerland                                                |
| Pigot, Alex              | Royal Society University Research Fellow                                                                | UCL                                                                                              | United Kingdom of Great Britain and Northern Ireland (the) |
| Pigott, J. Patrick       | Research Ecologist                                                                                      | Parks Victoria                                                                                   | Australia                                                  |
| Piikkila, Erik           | Forest and Watershed Ecologist                                                                          | Wildwood Ecoforest, Yellowpoint Ecological Society, Coastal Douglas-fir Conservation Partnership | Canada                                                     |
| Pijanowska, Joanna       | Professor/Ecology                                                                                       | University of Warsaw                                                                             | Poland                                                     |
| Pilastro, Andrea         | Professor of Evolutionary Biology                                                                       | University of Padova, Italy                                                                      | Italy                                                      |



|                             |                                                                                                                                           |                                                                              |                                                            |
|-----------------------------|-------------------------------------------------------------------------------------------------------------------------------------------|------------------------------------------------------------------------------|------------------------------------------------------------|
| Pilecky, Matthias           | Biochemistry                                                                                                                              | Donau Universität Krems                                                      | Austria                                                    |
| Pilia, Maura                | Astronomy, Postdoc                                                                                                                        | INAF - Cagliari Observatory                                                  | Italy                                                      |
| Pilkington, Fred            | Programme Officer for Plant Conservation                                                                                                  | Fauna and Flora International                                                | United Kingdom of Great Britain and Northern Ireland (the) |
| Pillai, Ajit                | Lecturer                                                                                                                                  | University of Exeter                                                         | United Kingdom of Great Britain and Northern Ireland (the) |
| Pillay, Thanusha            | MSc Med Student                                                                                                                           | University of the Witwatersrand, Johannesburg                                | South Africa                                               |
| Pilon, André Francisco      | Associate Professor (Senior)                                                                                                              | University of São Paulo / International Academy of Science, Health & Ecology | Brazil                                                     |
| Pilotto, Francesca          | Postdoctoral researcher                                                                                                                   | Umeå University                                                              | Sweden                                                     |
| PilsI, Sebastian            | PhD student                                                                                                                               | LIMES Institut fuer Chemische Biologie & Chemische Genetik                   | Germany                                                    |
| Pim, David                  | Staff scientist, molecular virology                                                                                                       | International Centre for Genetic Engineering and Biotechnology               | Italy                                                      |
| Pimbert, Michel             | Professor and Director of Centre for Agroecology, Water and Resilience                                                                    | Coventry University                                                          | United Kingdom of Great Britain and Northern Ireland (the) |
| Pimenta, Janielly           | Farmacêutica                                                                                                                              | Universidade de Fortaleza                                                    | Brazil                                                     |
| Pimentel, Edson             | Doctor                                                                                                                                    | State University of Campinas                                                 | Brazil                                                     |
| Pimentel, Gumerindo         | Biologist                                                                                                                                 | Instituto de Ciencias Médicas                                                | Panama                                                     |
| Pimentel-Peralta, Gumerindo | Biologist                                                                                                                                 | Instituto de Ciencias Médicas                                                | Panama                                                     |
| Piña, Carlos                | CONICET Researcher                                                                                                                        | CONICET and UADER                                                            | Argentina                                                  |
| PINAUD, Silvain             | Postdoc Host-Parasite Interaction                                                                                                         | Wellcome Sanger Institute                                                    | United Kingdom of Great Britain and Northern Ireland (the) |
| Pincebourde, Sylvain        | Researcher in organismal biology                                                                                                          | CNRS                                                                         | France                                                     |
| Pine, Ronald                | Zoology                                                                                                                                   | University of Kansas                                                         | United States of America (the)                             |
| Pine, Samuel                | Bioanalysis and Immunogenicity                                                                                                            |                                                                              | Belgium                                                    |
| Pineda, Mari-Carmen         | Marine Scientist                                                                                                                          |                                                                              | Australia                                                  |
| Pinheiro, Diego             | Postdoctoral Scholar                                                                                                                      | University of California, Davis                                              | United States of America (the)                             |
| Pinheiro, Frederico         | PHD student                                                                                                                               | ISCTE - Instituto Universitário de Lisboa                                    | Portugal                                                   |
| Pinheiro Dutra Rulli, Mayra | PhD candidate                                                                                                                             | Lund University                                                              | Sweden                                                     |
| Pinho, Luiz Carlos          | Professor of Zoology                                                                                                                      | Universidade Federal de Santa Catarina                                       | Brazil                                                     |
| Pinho, José                 | Associate Professor                                                                                                                       | University of Minho                                                          | Portugal                                                   |
| Pink, Ivo                   | Doctoral researcher / Geography                                                                                                           | Durham University                                                            | United Kingdom of Great Britain and Northern Ireland (the) |
| Pinkerton, Evelyn           | Professor, political ecology (anthropology)                                                                                               | School of Resource & Environmental Management, Simon Fraser University       | Canada                                                     |
| Pinna, Thomas               | PhD student                                                                                                                               | Sorbonne Université - UPMC                                                   | France                                                     |
| Pino Piderit, Andrea        | Transdisciplinary Center of Environmental and Human Sustainable Development Studies Chief // Researcher in Cape Horn International Center | Universidad Austral de Chile                                                 | Chile                                                      |
| Pinshow, Berry              | Professor Emeritus - Physiological Ecology                                                                                                | Ben-Gurion University of the Negev                                           | Israel                                                     |
| Pintar, Matthew             | Postdoctoral Associate                                                                                                                    | Florida International University                                             | United States of America (the)                             |

|                                |                                                    |                                                                                                                  |                                                            |
|--------------------------------|----------------------------------------------------|------------------------------------------------------------------------------------------------------------------|------------------------------------------------------------|
| Pinto, Manuel                  | Full Professor / Communication Sciences            | Universidade do Minho, Communication Sciences Department, ICS                                                    | Portugal                                                   |
| Pinto Figueroa, Eric Alejandro | Microbial Ecology / Soil Health                    | Terrabiom                                                                                                        | Switzerland                                                |
| Pinto-Ledezma, Jesus           | Evolutionary ecology                               | Department of Ecology, Evolution and Behavior, University of Minnesota                                           | United States of America (the)                             |
| Pinzner, Anika                 | PhD student/ Geoscience                            | University of Alaska Fairbanks                                                                                   | Germany                                                    |
| Pinzon, Jaime                  | Research Scientist                                 | Natural Resources Canada - Canadian Forest Service                                                               | Canada                                                     |
| Pioz, Maryline                 | epidemiologist                                     | INRA                                                                                                             | France                                                     |
| Piquer, Jose                   | Geologist                                          | Universidad Austral de Chile                                                                                     | Chile                                                      |
| Piraino, Stefano               | Chairman, Academic Board of Biology                | University of Salento                                                                                            | Italy                                                      |
| Pires, Mathias                 | Assistant Professor                                | Universidade Estadual de Campinas                                                                                | Brazil                                                     |
| Pires, Filipe                  | Astronomy                                          | Planetário do Porto, Centro Ciência Viva                                                                         | Portugal                                                   |
| Pires do Prado, Livia          | PhD Student                                        | Museu Paraense Emílio Goeldi                                                                                     | Brazil                                                     |
| Pirhadi, Negin                 | IMBRSEA Erasmus student                            | Ghent University                                                                                                 | Iran (Islamic Republic of)                                 |
| Pirhofer Walzl, Karin          | Post Doc                                           | Freie Universität Berlin                                                                                         | Germany                                                    |
| Pirog, Mirosław                | assistant professor                                | University of Silesia                                                                                            | Poland                                                     |
| Pischedda, Doris               | Postdoc in Neuroscience                            | Charité – Universitätsmedizin Berlin                                                                             | Germany                                                    |
| Piskorowski, Rebecca           | Team Leader, Principle investigator                | Institute of Psychiatry and Neuroscience of Paris, INSERM UMR1266                                                | France                                                     |
| Pita, Miguel                   | Senior lecturer and researcher                     | Universidad Autónoma de Madrid                                                                                   | Spain                                                      |
| Pitman, Nigel                  | Mellon Senior Conservation Ecologist               | Field Museum of Natural History                                                                                  | United States of America (the)                             |
| Piton, Gabin                   | PhD in Ecology                                     | Laboratory of Alpine Ecology                                                                                     | France                                                     |
| Pitre, Karolane                | Biologist                                          |                                                                                                                  | Canada                                                     |
| Pittalis, Sophie               | Lecturer in Information and Communication Sciences | Université de Lille                                                                                              | France                                                     |
| Pitte, Pierre                  | Assistant researcher/Glaciology                    | IANIGLA-CONICET                                                                                                  | Argentina                                                  |
| Pittermann, Jarmila            | Associate Professor/Plant Eco-physiology           | University of California, Santa Cruz                                                                             | United States of America (the)                             |
| Pittman, Simon                 | Researcher                                         | University of Plymouth                                                                                           | United Kingdom of Great Britain and Northern Ireland (the) |
| Pittock, Jamie                 | Professor of Geography                             | Australian National University                                                                                   | Australia                                                  |
| Piuz, André                    | Researcher - Geology & Paleontology                | Natural History Museum Geneva                                                                                    | Switzerland                                                |
| Piwoz, Kasia                   | Aquatic Microbial Ecology                          | Institute of Microbiology, Czech Academy of Sciences                                                             | Czech Republic (the)                                       |
| Pizarro, Valeria               | Senior Research Associate                          | Cape Eleuthera Institute                                                                                         | Bahamas (the)                                              |
| Pizo, Marco Aurelio            | professor                                          | São Paulo State University                                                                                       | Brazil                                                     |
| Pizzigalli, Cristian           | Ph.D candidate                                     | CIBIO-InBio                                                                                                      | Portugal                                                   |
| Plachetka, Uwe-Christian       | agricultural anthropologist and risk researcher    |                                                                                                                  | Austria                                                    |
| Placi, Sarah                   | Post-doc researcher in cognitive sciences          | German Primate Center - University of Göttingen                                                                  | Germany                                                    |
| Plag, Hans-Peter               | Professor and Director                             | Old Dominion University, Department of Ocean and Earth Sciences and Mitigation and Adaptation Research Institute | United States of America (the)                             |
| plain, nicolas                 | PhD Candidate                                      | Institut des Géosciences de l' Environnement (IGE)                                                               | France                                                     |
| Plaisance, Laetitia            | tropical marine and terrestrial biodiversity       | CNRS                                                                                                             | France                                                     |

|                        |                                                                     |                                                                         |                                                            |
|------------------------|---------------------------------------------------------------------|-------------------------------------------------------------------------|------------------------------------------------------------|
| Planchon, Olivier      | Climate scientist                                                   | CNRS / UMR 6282 Biogéosciences, University of Burgundy, Dijon (France)  | France                                                     |
| Planer, Katarina       | Professor                                                           | Hochschule Esslingen                                                    | Germany                                                    |
| Planillo, Aimara       | Postdoc                                                             | Leibniz Institute for Zoo and Wildlife Research                         | Germany                                                    |
| Plank, Michael         | Professor in Applied Mathematics                                    | University of Canterbury                                                | New Zealand                                                |
| Plantard, Olivier      | Senior Researcher                                                   | INRA                                                                    | France                                                     |
| Plat, Nattan           | PhD Student                                                         | INRAE                                                                   | France                                                     |
| Platenberg, Renata     | Wildlife Biologist                                                  | University of the Virgin Islands                                        | Virgin Islands (U.S.)                                      |
| Platts, Philip         | Research Fellow in Conservation Science                             | University of York                                                      | United Kingdom of Great Britain and Northern Ireland (the) |
| Plaza Pinto, Míriam    | Professor                                                           | Universidade Federal do Rio Grande do Norte                             | Brazil                                                     |
| pleguezuelos, juan m   | Full Professor                                                      | Granada University                                                      | Spain                                                      |
| Plentz, Annelie        | clinical virologist                                                 | university clinics of Regensburg                                        | Germany                                                    |
| Plevin, Richard        | Research Scientist (retired)                                        | University of California, Berkeley                                      | United States of America (the)                             |
| Plieninger, Tobias     | Professor of Social-Ecological Interactions in Agricultural Systems | University of Göttingen and University of Kassel                        | Germany                                                    |
| Plischoff, Patricio    | Professor Institute of Geography and Department of Ecology          | Universidad Catolica de Chile                                           | Chile                                                      |
| Plóciennik, Mateusz    | assistant professor/palaeoclimatology, paleolimnology               | Department of Invertebrate Zoology and Hydrobiology, University of Lodz | Poland                                                     |
| Ploeger, Felix         | Prof. / Atmospheric Physics                                         | –                                                                       | Germany                                                    |
| plomion, christophe    | scientist                                                           | INRA                                                                    | France                                                     |
| Ploog, Peter           | Manager / Health care                                               |                                                                         | Germany                                                    |
| Plotz, Roan            | Lecturer in Environmental Science                                   | Victoria University                                                     | Australia                                                  |
| Plougonven, Riwal      | Professor                                                           | Ecole Polytechnique                                                     | France                                                     |
| Plutoni, Cedric        | Postdoctoral Fellow                                                 | University of Montréal - IRI                                            | Canada                                                     |
| Pocock, Naomi          | Lecturer                                                            | University of Waikato                                                   | New Zealand                                                |
| Pocza, Péter           | Associate Professor                                                 | University of Helsinki                                                  | Finland                                                    |
| Podadera, Diego        | PhD Student                                                         | University of Campinas/UNICAMP                                          | Brazil                                                     |
| Podger, Neil           | Agriculture - Poultry Production                                    | Retired - formerly Experimental Officer CSIRO Australia                 | Australia                                                  |
| Poesch, Mark           | Associate Professor                                                 | University of Alberta                                                   | Canada                                                     |
| POETA, MARIA LUANA     | Assistant Professor                                                 |                                                                         | Italy                                                      |
| Pogány, Ákos           | Researcher, Behavioural Ecology                                     | Department of Ethology, Eötvös Loránd University                        | Hungary                                                    |
| Poggi, Rado Carlo      | director of the institute / political analyst and economist         | raum AU                                                                 | Slovenia                                                   |
| Pohlmann, Kirsten      | Ecology                                                             | Leibniz Institute for freshwater ecology and inland fisheries           | Germany                                                    |
| Pointecouteau, Etienne | Astrophysicist                                                      | IRAP/CNRS                                                               | France                                                     |
| Poirier, Vincent       | Professor of soil science                                           | Université du Québec en Abitibi-Témiscamingue (UQAT)                    | Canada                                                     |
| Pokladnik, Randi       | Environmental studies                                               | Ohio Valley Environmental Coalition                                     | United States of America (the)                             |

|                             |                                                               |                                                                |                                                            |
|-----------------------------|---------------------------------------------------------------|----------------------------------------------------------------|------------------------------------------------------------|
| Pokrant, Bob                | Adjunct Professor of Anthropology                             | Curtin University                                              | Australia                                                  |
| Pola, Marta                 | Marine biologist                                              | Universidad Autónoma de Madrid                                 | Spain                                                      |
| Poland, Blake               | Associate Professor                                           | University of Toronto                                          | Canada                                                     |
| Polati, Flávia              | Physics Teacher                                               | Universidade Federal do Rio Grande do Norte                    | Brazil                                                     |
| Polazzo, Francesco          | PhD student                                                   | IMDEA water institute                                          | Spain                                                      |
| Polesello, Stefano          | Environmental Chemistry Researcher                            | Water Research Institute-CNR                                   | Italy                                                      |
| Poletto, Davide             | International Consultant - Sustainable development governance | UNESCO                                                         | Italy                                                      |
| Poli, Anna                  | Postdoc                                                       | Università of Torino                                           | Italy                                                      |
| Polissi, Alessandra         | Microbiologist                                                | University of Milano                                           | Italy                                                      |
| Politi, Natalia             | Researcher Conservation Biologist                             | Instituto de Ecorregiones Andinas CONICET/UNJu                 | Argentina                                                  |
| Polizzi, Stefano            | Prof. Physical Chemistry                                      | Università Ca' Foscari Venezia                                 | Italy                                                      |
| Polk, Sarah                 | Graduate student, neuroscience                                | Max Planck Institute for Human Development                     | Germany                                                    |
| Pollard, Chris              | Conservation Science                                          | Forest Research                                                | United Kingdom of Great Britain and Northern Ireland (the) |
| Pollard, John               | Professor Emeritus                                            | The University of Sydney                                       | Australia                                                  |
| Pollari, Maija              | postdoctoral researcher                                       | University of Helsinki                                         | Finland                                                    |
| Pollok Narayanan, Andrea    | Dipl Physicist                                                | Multifunctional Fairnecion                                     | Germany                                                    |
| Pols, Auke                  | Lecturer Knowledge, Technology and Innovation                 | Wageningen University & Research                               | Netherlands (the)                                          |
| Poltronieri, Palmiro        | researcher in biology                                         | National Research Council of Italy                             | Italy                                                      |
| Polushkina, Oliver          | Bioinformatician/biotech                                      | IDIBELL                                                        | Spain                                                      |
| Polvé, Mireille             | University Professor, Geochemistry                            | Observatoire Midi-Pyrénées-CNRS-Université de Toulouse         | France                                                     |
| Pomeroy, Patrick            | senior scientist                                              | University of St Andrews                                       | United Kingdom of Great Britain and Northern Ireland (the) |
| Pommerening, Florian        | Post-doctoral researcher                                      | University of Basel                                            | Switzerland                                                |
| Pompeu, Paulo               | Professor                                                     | University of Lavras                                           | Brazil                                                     |
| Ponce, Reina                | Administrador de Fauna Silvestre                              | Instituto Veterinario y de ecología m                          | Mexico                                                     |
| Ponce Toledo, Rafael Isaac  | Evolutionary Biology                                          | University of Vienna                                           | Austria                                                    |
| Ponge, Jean-François        | professor emeritus in soil ecology                            | Muséum National d'Histoire Naturelle                           | France                                                     |
| Pons, Pere                  | Associate professor. Animal ecology and Conservation.         | University of Girona                                           | Spain                                                      |
| Pons, Jean-Marc             | Assistant Professor, Biologist                                | Museum National d'Histoire Naturelle                           | France                                                     |
| Pons Buades, Guillem Xavier | Professor UIB/Biogeography                                    | University of the Balearic Islands                             | Spain                                                      |
| Ponte, Gilian               | PhD Candidate                                                 | Rijksuniversiteit Groningen                                    | Netherlands (the)                                          |
| Pontius, Jennifer           | Research Professor                                            | University of Vermont                                          | United States of America (the)                             |
| Ponton, Jose                | PhD student in Bioscience Engineering                         | Ghent University                                               | Ecuador                                                    |
| Ponton, Stephane            | Scientist                                                     | INRA                                                           | France                                                     |
| Ponton, Dominique           | Senior Research Officer                                       | French National Research Institute for Sustainable Development | Madagascar                                                 |
| Pool, Monique               | Director, Environmental Activist                              | Green Heritage Fund Suriname                                   | Suriname                                                   |
| Poorter, Hendrik            | Plant Ecophysiologicalist                                     | Forschungszentrum Jülich                                       | Germany                                                    |

|                             |                                                                                      |                                                           |                                                            |
|-----------------------------|--------------------------------------------------------------------------------------|-----------------------------------------------------------|------------------------------------------------------------|
| Pope, Lisa                  | PhD in Biology                                                                       | The University of Queensland                              | Australia                                                  |
| Popescu, Daniel             | Pharmacy                                                                             |                                                           | Spain                                                      |
| Popko, Svitlana             | MD, PhD, assistant professor of the Department of Histology, Cytology and Embryology | Zaporizhzhya state medical university                     | Ukraine                                                    |
| Popoff, Nadège              | PhD                                                                                  | Irstea                                                    | France                                                     |
| Popov, Todor                | professor                                                                            | University Hospital Sv. Ivan Rilski                       | Bulgaria                                                   |
| Popova, Iskra               | Associated professor at the department for Computer and System Sciences              | Stockholm University                                      | Sweden                                                     |
| Popovici, Dan               | Professor, Mathematics                                                               | Université Paul Sabatier, Toulouse                        | France                                                     |
| POPOVICI, Eduard-Cristian   | Assoc. Prof.                                                                         | Politehnica University of Bucharest                       | Romania                                                    |
| Popovsky, Josiane           | Biologist                                                                            |                                                           | France                                                     |
| Popp, Andrea                |                                                                                      | ETH Zurich                                                | Switzerland                                                |
| Popp, Sharon                | Anthropology                                                                         | Retired                                                   | United States of America (the)                             |
| Poppe, Annika Elena         | Political Science                                                                    | Peace Research Institute Frankfurt                        | Germany                                                    |
| Porcar Anento, Roger        | Research collaborator (Sustainability Science and Technologies)                      | Universitat Politècnica de Catalunya                      | Spain                                                      |
| Porcher, Emmanuelle         | Professor of Ecology                                                                 | Muséum national d'Histoire naturelle                      | France                                                     |
| Porfido, Joseph             | Chemist                                                                              |                                                           | United States of America (the)                             |
| Porras-Bernardez, Francisco | Lecturer/Researcher, Cartography                                                     | TU Wien                                                   | Austria                                                    |
| Porro, Roberto              | Researcher                                                                           | Embrapa                                                   | Brazil                                                     |
| Porta, Miquel               | Professor of Preventive Medicine, Epidemiology & Public Health                       | IMIM UAB PSMar PRBB                                       | Spain                                                      |
| Portabella, Marcos          | Senior Researcher                                                                    | Spanish Research Council (CSIC)                           | Spain                                                      |
| portail, Marie              | Marine ecologist                                                                     |                                                           | France                                                     |
| Portanier, Elodie           | Post doctoral / ecology                                                              | University Lyon 1                                         | France                                                     |
| Portas, Ruben               | Wildlife Researcher                                                                  | Leibniz Institute for Zoo and Wildlife Research of Berlin | Namibia                                                    |
| Porter, Christine           | Associate Professor and Wyoming Excellence Chair in Community & Public Health        | University of Wyoming                                     | United States of America (the)                             |
| Portier, Christopher        | Environmental Health Research                                                        | Private                                                   | Switzerland                                                |
| Portillo Estrada, Miguel    | Post-doc researcher in plant ecophysiology                                           | University of Antwerp                                     | Belgium                                                    |
| Pörtner, Lukas              | Doctoral researcher                                                                  | Ruhr-University Bochum                                    | Germany                                                    |
| Portoghese, Ivan            | Research Scientist                                                                   | National Research Council                                 | Italy                                                      |
| Portugal, Steve             | Reader in Animal Behaviour and Physiology                                            | Royal Holloway University of London                       | United Kingdom of Great Britain and Northern Ireland (the) |
| Posada, Zulay               | Biologa                                                                              | independiente                                             | Colombia                                                   |
| Pospech, Jola               | Assistant Professor in Organic Chemistry                                             | Leibniz Institute for Catalysis Rostock                   | Germany                                                    |
| Post, Yanina                | Biologist                                                                            | Osnabrueck University                                     | Germany                                                    |
| Post, David                 | Senior Hydrologist                                                                   | CSIRO                                                     | Australia                                                  |
| Postic, Sebastien           | Researcher - Taxation, Development, and Climate                                      | Institute for Climate Economics                           | France                                                     |
| Postma, Johannes            | Seignior researcher plant biology, agronomy                                          | Forschungszentrum Juelich                                 | Germany                                                    |
| Potapova, Elena             | ecologist-urbanist                                                                   | Irkutsk State University                                  | Russian Federation (the)                                   |

|                        |                                                                           |                                                                                     |                                |
|------------------------|---------------------------------------------------------------------------|-------------------------------------------------------------------------------------|--------------------------------|
| Poteete, Amy           | Co-Director, Loyola Sustainability Research Centre/Political Science      | Concordia University                                                                | Canada                         |
| Potkamp, Gerrit        | PhD student, Evolutionary biology                                         | University of Groningen                                                             | Netherlands (the)              |
| Potter, Joei           | Assistant Professor                                                       | University College Dublin                                                           | Ireland                        |
| Potter, Kevin M.       | Research Associate Professor                                              | Department of Forestry and Environmental Resources, North Carolina State University | United States of America (the) |
| Potter, Tamara         | TERN Field Assistant                                                      | University of Adelaide                                                              | Australia                      |
| Potter, Joanna         | Assistant professor - veterinary anaesthesia                              | University college Dublin                                                           | Ireland                        |
| Potter, William        | Professor                                                                 | University of Tulsa                                                                 | United States of America (the) |
| Potterf, Maria         | Postdoctoral researcher                                                   | University of Jyväskylä                                                             | Finland                        |
| Potters, Hans          | Retired Physicist                                                         |                                                                                     | Netherlands (the)              |
| Potti, Jaime           | Senior researcher, Ecology                                                | CSIC                                                                                | Spain                          |
| Pottler, Klaus         | Managing Director, Solar Energy Consulting                                | CSP Servcies GmbH                                                                   | Germany                        |
| Potts MD, PhD, Malcolm | Population, family planning, women's education                            | UC Berkeley                                                                         | United States of America (the) |
| Potvin, Catherine      | Professor                                                                 | McGill University                                                                   | Canada                         |
| Potvin, Dominique      | Lecturer (Assistant Professor), Animal Ecology                            | University of the Sunshine Coast                                                    | Australia                      |
| Pou Àlvarez, Núria     | Projects Officer at Biodiversity and Animal Conservation Lab              | Forest Sciences Centre of Catalonia                                                 | Spain                          |
| Poujol, Marc           | University Associate Professor in Earth Sciences                          | University of Rennes                                                                | France                         |
| poulain, cedric        | scientist (fluid mechanics)                                               | CEA Grenoble,                                                                       | France                         |
| Poulet, Lucie          | Postdoctoral Research Fellow                                              | NASA Kennedy Space Center                                                           | United States of America (the) |
| Poulin, Robert         | Professor of Zoology                                                      | University of Otago                                                                 | New Zealand                    |
| Poulos, Didier         | Data scientist                                                            | Clean Ocean Hub                                                                     | France                         |
| Poulsen, Anne          | Honorary Associate Professir                                              | The University of Queensland                                                        | Australia                      |
| POUNOT, Kevin          | PhD Student                                                               | Institut Laue-Langevin                                                              | France                         |
| poupaud, mariline      | phd student in veterinary public health                                   | CIRAD & University of Liege                                                         | Finland                        |
| Pourret, Olivier       | Associate Professor Biogeochemistry                                       | UniLaSalle                                                                          | France                         |
| Pouteau, Robin         | Associate Professor                                                       | Taizhou University                                                                  | China                          |
| Pouyet, Robin          | PhD student / Polymer chemist                                             | Université de Reims Champagne-Ardenne                                               | France                         |
| POVEDA, GERMAN         | FULL PROFESSOR - HYDROCLIMATOLOGY                                         | UNIVERSIDAD NACIONAL DE COLOMBIA AT MEDELLIN                                        | Colombia                       |
| Povinelli, Benjamin    | Staff Fellow                                                              | FDA                                                                                 | United States of America (the) |
| Powell, Samuel         | Postdoctoral Research Fellow                                              | The University of Queensland                                                        | Australia                      |
| Powell, Roger A        | Professor Emeritus                                                        | North Carolina State University                                                     | United States of America (the) |
| Powell, David          | Forest ecology                                                            | Eastern Oregon Climate Change Coalition                                             | United States of America (the) |
| Powell, Amy            | Climate scienitst (sea ice), evolutionary biologist and software engineer | Sandia National Laboratories                                                        | United States of America (the) |
| Power, Donovan         | Lead scientist at Power Economic Consulting/ Glaciologist/Geologist       | Power Economic Consulting (www.powereconconsulting.com)                             | United States of America (the) |
| Power, Thomas          | Professor Emeritus                                                        | Economics Univ. of Montana                                                          | United States of America (the) |
| Powers, Breanna        | Post doctoral researcher                                                  | Boise State University                                                              | United States of America (the) |

|                            |                                                          |                                                                           |                                                            |
|----------------------------|----------------------------------------------------------|---------------------------------------------------------------------------|------------------------------------------------------------|
| Poynter, Alexander         | Lecturer in Ecology and Conservation                     | University of Cumbria                                                     | United Kingdom of Great Britain and Northern Ireland (the) |
| Pozsgai, Gabor             | Post-Doctoral Research Fellow/Ecology                    | Fujian Agriculture and Forestry University                                | China                                                      |
| Pozzobon, Allan            | Posdoc                                                   | UFRJ                                                                      | Brazil                                                     |
| Prach, Karel               | Professor, Plant Ecology                                 | Faculty of Science USB, Ceske Budejovice                                  | Czech Republic (the)                                       |
| Pradella, Fabienne         | Chair of Statistics & Econometrics                       | Mainz University                                                          | Germany                                                    |
| Prado, Ivo                 | Freshwater fish researcher                               | Universidade Federal de Lavras/Pisces - consultoria e serviços ambientais | Brazil                                                     |
| Prado, Jefferson           | Scientific Researcher - Botany                           | Instituto de Botânica                                                     | Brazil                                                     |
| Prados, Ana                | Research Associate Professor /Atmospheric Chemistry      | University of Maryland Baltimore County                                   | United States of America (the)                             |
| Prados, Emmanuel           | Researcher                                               | INRIA                                                                     | France                                                     |
| Pramono, Albertus          | Researcher                                               | Research Center for Climate Change, University of Indonesia               | Indonesia                                                  |
| Prang, Renee               | Senior scientist - Astrophysics                          | Observatoire de Paris                                                     | France                                                     |
| Prantzos, Nikos            | Director of Research in French CNRS/Astrophysicist       | Centre National pour la Recherche Scientifique                            | France                                                     |
| Prat Fornells, Narcís      | Professor Ecology                                        | Universitat de Barcelona                                                  | Spain                                                      |
| Prates, Maria Paula        | Research Fellow                                          | City, University of London                                                | United Kingdom of Great Britain and Northern Ireland (the) |
| Prato, Tony                | Professor Emeritus of Agricultural and Applied Economics | University of Missouri-Columbia                                           | United States of America (the)                             |
| Prats-Llinàs, Maria Teresa | PhD in agriculture                                       |                                                                           | Spain                                                      |
| Pratt, Jessica             | Associate Professor- Ecology and Evolution               |                                                                           | United States of America (the)                             |
| Predavec, Martin           | Ecologist                                                | Royal Zoological Society of New South Wales                               | Australia                                                  |
| Preece, Noel               | Adj. Assoc. Prof.                                        | James Cook University                                                     | Australia                                                  |
| Preece, Catherine          | Postdoc in ecology                                       | CREAF                                                                     | Spain                                                      |
| Preiser, Wolfgang          | Professor and Head: Division of Medical Virology         | Stellenbosch University                                                   | South Africa                                               |
| Preisner, Balint           |                                                          | MTA Centre for Ecological Research                                        | Hungary                                                    |
| Premchand, Brian           | Scientist/Neuroscience                                   |                                                                           | Singapore                                                  |
| Premier, Giuliano          | Emeritus Professor                                       | University of South Wales                                                 | United Kingdom of Great Britain and Northern Ireland (the) |
| Prendergast, Amy           | Senior Lecturer, School of Geography                     | University of Melbourne                                                   | Australia                                                  |
| Prendergast, Kit           | PhD, ecology                                             | Curtin University                                                         | Australia                                                  |
| Prendini, Lorenzo          | Curator and Professor                                    | American Museum of Natural History                                        | United States of America (the)                             |
| Prentice, Honor C.         | Professor/Biology                                        | Department of Biology, Lund University                                    | Sweden                                                     |
| Presley, Steven            | Postdoctoral Associate, Ecologist                        | University of Connecticut                                                 | United States of America (the)                             |
| Preston, Elizabeth         | PhD student Behavioural Ecology                          | University of Exeter                                                      | United Kingdom of Great Britain and Northern Ireland (the) |
| Preston, Joanne            | Principal Lecturer - Marine Biology                      | University of Portsmouth                                                  | United Kingdom of Great Britain and Northern Ireland (the) |
| Presto, César              |                                                          | Civil engineer                                                            | France                                                     |
| Previero, Marília          | Biologist Research                                       | Fishery Institute of São Paulo State                                      | Brazil                                                     |
| Prevost, Genevieve         | University Professor in Insect Ecology                   | University of Picardie - Jules Verne                                      | France                                                     |

|                              |                                                                      |                                                                                      |                                                            |
|------------------------------|----------------------------------------------------------------------|--------------------------------------------------------------------------------------|------------------------------------------------------------|
| PREVOST, Genevieve           | University Professor of Insect Ecology                               | University of Picardie - Jules Verne                                                 | France                                                     |
| Price, Mary                  | Professor of Biology, Emerita                                        | University of California                                                             | United States of America (the)                             |
| Price, Catherine             | Postdoctoral Researcher                                              | University of Sydney                                                                 | Australia                                                  |
| Price, Cormac                | PhD candidate herpetology                                            | University of KwaZulu-Natal                                                          | South Africa                                               |
| Price, Donald                | Professor of Biology                                                 | University of Nevada, Las Vegas                                                      | United States of America (the)                             |
| Price, Rebecca               | Professor                                                            | University of Washington Bothell                                                     | United States of America (the)                             |
| Price, Eluned                |                                                                      | Durrell Wildlife Conservation Trust                                                  | United Kingdom of Great Britain and Northern Ireland (the) |
| Price, Frank                 | Retired Ecologist                                                    | Utica College                                                                        | United States of America (the)                             |
| Price, Karen                 | Ecological consultant (PhD)                                          | Self-employed                                                                        | Canada                                                     |
| Price, Melissa               | Wildlife Management                                                  | University of Hawaii at Manoa                                                        | Zimbabwe                                                   |
| Priess, Joerg                | Senior scientist, environmental science                              | Helmholtz Center for Environmental Research - UFZ                                    | Germany                                                    |
| Priest, Neal                 | Emergency Medicine Physician                                         | St. Mary's Hospital, Athens, GA                                                      | United States of America (the)                             |
| Prieto, Iván                 | Postdoctoral researcher                                              | Centro de Edafología y Biología Aplicada del Segura (CEBAS-CSIC)                     | Spain                                                      |
| PRIETO, FERNANDO             | PHD IN ECOLOGY                                                       | OBSERVATORIO SOSTENIBILIDAD                                                          | Spain                                                      |
| Prieto-Torres, David A.      | Posdoctoral Researcher                                               | Universidad Nacional Autónoma de México                                              | Mexico                                                     |
| Pringels, Lentel             | PhD                                                                  | KULeuven                                                                             | Belgium                                                    |
| Prinz, Rainer                | Glaciologist                                                         | Department of Atmospheric and Cryospheric Sciences, University of Innsbruck          | Austria                                                    |
| Priotto, José                | Investigador Principal CONICET, Profesor Asociado UNRC               | ICBIA, , CONICET-UNRC                                                                | Argentina                                                  |
| Pritchett, Thomas            | Chemist                                                              | Cedar Crest College                                                                  | United States of America (the)                             |
| Priyadarshini, K V R         | Independent Researcher                                               |                                                                                      | Lao People's Democratic Republic (the)                     |
| Prodocimo, Viviane           | Comparative Physiology Professor                                     | Federal University of Paraná, Brazil                                                 | Brazil                                                     |
| Prodon, Roger                | emeritus, animal ecology                                             | Ecole Pratique des Hautes Etudes                                                     | France                                                     |
| Proença-Ferreira, António    | PhD Student                                                          | CIBIO-InBio / Universidade de Évora                                                  | Portugal                                                   |
| Professor Dr. Stehr, Nico    | Social Science                                                       | Zeppelin University                                                                  | Germany                                                    |
| Proffitt, Geoffrey           | Professor applied ecology                                            | Swansea university                                                                   | United Kingdom of Great Britain and Northern Ireland (the) |
| Prokop, Zofia                | assistant professor, biology                                         | Jagiellonian Univewrsity in Krakow                                                   | Poland                                                     |
| Prokopavicius, Renée Marchin | Plant Biology                                                        | Western Sydney University                                                            | Australia                                                  |
| Promberger, Markus           | Professor, head of department, sociology, labour and poverty studies | Institute for Employment Research (IAB), Nuremberg, and University of Erlangen (FAU) | Germany                                                    |
| Promponas, Vasilis           | Head, Bioinformatics Research Laboratory                             | Department of Biological Sciences, University of Cyprus                              | Cyprus                                                     |
| Prospathopoulos, Aristeidis  | Associate Researcher                                                 | Hellenic Centre for Marine Research                                                  | Greece                                                     |
| Protzer, Ulrike              | Full Professor                                                       | Technical University of Munich                                                       | Germany                                                    |
| Proust, Sébastien            | Scientist, Fluid Mechanics                                           | Irstea                                                                               | France                                                     |
| Prowe, Steffen               | Prof. for Microbiology                                               | Beuth University of Applied Sciences                                                 | Germany                                                    |
| Pruegger, Valerie            | Adjunct Professor                                                    | University of Calgary                                                                | Canada                                                     |



|                            |                                                   |                                                                                                                 |                                                            |
|----------------------------|---------------------------------------------------|-----------------------------------------------------------------------------------------------------------------|------------------------------------------------------------|
| Prume, Julia               | phd in environmental sciences                     | Philipps-Universität Marburg                                                                                    | Germany                                                    |
| Psalti, Marina             | PhD student                                       | University of Mainz, Germany                                                                                    | Germany                                                    |
| Psalti, Marina Natalia     | PhD student                                       | Institute of Molecular and Evolutionary Biology                                                                 | Germany                                                    |
| Pseiridis, Anastasia       | Assistant Professor (tenured) of Microeconomics   | Panteion University                                                                                             | Greece                                                     |
| Puccinelli, Eleonora       | Postdoc                                           | University of Cape Town                                                                                         | South Africa                                               |
| Puchi, Paulina             | PhD student Land Environment Resources and Health | University of Padova                                                                                            | Italy                                                      |
| Puechmaille, Sebastien J.  | Associate Professor                               | ISEM, University of Montpellier                                                                                 | France                                                     |
| Puerta, Yarin              | Environmental engineer                            | University of Antioquia                                                                                         | Colombia                                                   |
| Puértolas, Laura           | PhD Ecology & Env. Science                        | ALBIEM                                                                                                          | Spain                                                      |
| Pugnaire, Francisco        | Ecologist                                         | EEZA-CSIC                                                                                                       | Spain                                                      |
| Puig, Daniel               | Senior Advisor                                    | Technical University of Denmark                                                                                 | Denmark                                                    |
| Puig i Boix, Josep         | Retired university professor on energy            | Autonomous University of Barcelona                                                                              | Spain                                                      |
| Puig-Gironès, Roger        | Biodiversity researcher                           | Universitat de Girona - Universitat de Barcelona                                                                | Spain                                                      |
| Puillandre, Nicolas        | Assistant Professor in Evolutionary Biology       | Muséum National d'Histoire Naturelle                                                                            | France                                                     |
| Pujol, Benoit              | Researcher in evolutionary quantitative genetics  | CNRS                                                                                                            | France                                                     |
| Pulkkinen, Lauri           | PhD student, microbiology & structural biology    | University of Helsinki                                                                                          | Finland                                                    |
| Pullen, Kirsten            | Director of Conservation and Education            | Wild Planet Trust                                                                                               | United Kingdom of Great Britain and Northern Ireland (the) |
| Puniamoorthy, Nalini       | Assistant professor                               | National university of Singapore                                                                                | Singapore                                                  |
| Puotinen, Marji            | Geographer and coral reef scientist               | Australian Institute of Marine Science                                                                          | Australia                                                  |
| Pupim, Fabiano             | Professor/Geographer                              | Federal University of São Paulo                                                                                 | Brazil                                                     |
| Purdie, Gordon             | Biostatistician                                   | University of Otago                                                                                             | New Zealand                                                |
| Purhonen, Jenna            | Postdoctoral Researcher, Conservation science     | University of Jyväskylä                                                                                         | Finland                                                    |
| Purohit, Divyadarshan      | Director,Scientist,Engineer                       | Gurudev Observatory                                                                                             | India                                                      |
| Purton, Chris              | retired; astronomy                                |                                                                                                                 | Canada                                                     |
| Purvis, Andy               | Research Leader and Individual Merit Researcher   | The Natural History Museum, London                                                                              | United Kingdom of Great Britain and Northern Ireland (the) |
| Pushkareva, Ekaterina      | Postdoctoral researcher                           | University of Rostock                                                                                           | Germany                                                    |
| Pushpakaran, Prof Prem raj | Professor & Scientist - BioTechnology             | NITC                                                                                                            | India                                                      |
| Püttker, Thomas            | Assistant Professor                               | Federal University of Sao Paulo                                                                                 | Brazil                                                     |
| Pütz, Peter                | Statistician                                      | University of Göttingen                                                                                         | Germany                                                    |
| Pütz, Gerhard              | Senior Scientist Clinical Chemistry               | University Freiburg Medical Center                                                                              | Germany                                                    |
| Putzke, Jair               | Professor                                         | UNIPAMPA                                                                                                        | Brazil                                                     |
| Puyravaud, Jean-Philippe   | Ecologist                                         | Sigur Nature Trust                                                                                              | India                                                      |
| Pyhälä, Mikko              | Nonfiction writer global environment              | Jyväskylä University YTL (PhD) 1984                                                                             | Finland                                                    |
| Pyke, Graham               | Adjunct Professor                                 | Macquarie University                                                                                            | Australia                                                  |
| Pyle, Robert               | ecology                                           | independent                                                                                                     | United States of America (the)                             |
| Pypkker, Thomas            | Ecohydrologist                                    | Thompson Rivers University                                                                                      | Canada                                                     |
| Pyšek, Petr                | researcher, ecologist                             | Institute of Botany, Czech Academy of Sciences & Faculty of Science, Charles University, Prague, Czech Republic | Czech Republic (the)                                       |

|                             |                                                                                  |                                                                                      |                                                            |
|-----------------------------|----------------------------------------------------------------------------------|--------------------------------------------------------------------------------------|------------------------------------------------------------|
| Qi, Yueling                 | PhD student                                                                      | Wageningen University & Research                                                     | Netherlands (the)                                          |
| Qilsaon, Mark               | Professor Emeritus                                                               | University of Alberta                                                                | Canada                                                     |
| Quadra, Gabrielle           | PhD student                                                                      | Federal University of Juiz de Fora                                                   | Brazil                                                     |
| Quadri, Paulo               | Researcher and Consultant in Consevation Science                                 | UC Santa Cruz                                                                        | Mexico                                                     |
| Quagliarotti, Desirée A.L.  | Researcher, Environmental Economics                                              | National Research Council (CNR) - Institute for Studies on the Mediterranean (ISMed) | Italy                                                      |
| Quagliarotti, Desiree A.L.  | Researcher                                                                       | National Research Council - CNR                                                      | Italy                                                      |
| Quaglietta, Lorenzo         | Post-doc researcher                                                              |                                                                                      | Italy                                                      |
| Quaranta, Giuseppe          | responsible for photoelectronics research                                        | Scientia Group Italia                                                                | Italy                                                      |
| Quartermain, Evan           | Head of Programs / Ecologist                                                     | Humane Society International                                                         | Australia                                                  |
| quatrini, myriam            | maitre de conferences                                                            | AMU/CNRS                                                                             | France                                                     |
| Queen, Kathryn              | Aquatic Ecologist                                                                | Western Washington University & Institute for Watershed Studies                      | United States of America (the)                             |
| Queenan, Kevin              | Veterinarian, One Health Researcher                                              | Royal Veterinary College, University of London                                       | United Kingdom of Great Britain and Northern Ireland (the) |
| Quéguiner, Bernard          | Professor                                                                        | Aix-Marseille University                                                             | France                                                     |
| Queiroga, Henrique          | Associate Professor, Marine Ecology                                              | University of Aveiro                                                                 | Portugal                                                   |
| Queirolo, Diego             | Associate Professor of animal ecology                                            | Universidad de la República                                                          | Uruguay                                                    |
| Queiroz, Antonio            | Postdoc Fellow                                                                   | University of Lavras - UFLA                                                          | Brazil                                                     |
| Queiroz, Nuno               | Assistant researcher - marine ecology                                            | CIBIO / InBIO - Research Center in Biodiversity and Genetic Resources                | Portugal                                                   |
| Queiroz, Helder             | Researcher                                                                       | Instituto de Desenvolvimento Sustentável Mamirauá - IDSME/OS-MCTIC                   | Brazil                                                     |
| Queiroz A. Silva, Carolina  | Ph.D. Physics                                                                    | University of Sao Paulo                                                              | Brazil                                                     |
| Quéméré, Erwan              | Associate researche in ecology                                                   | INRA                                                                                 | France                                                     |
| Quennehen, Marine           | PHD                                                                              | INED                                                                                 | France                                                     |
| Quentin, Yves               | Researcher                                                                       | CNRS                                                                                 | France                                                     |
| Querejeta, José Ignacio     | Permanent Staff Scientist                                                        | National Research Council (Consejo Superior de Investigaciones Científicas_CSIC)     | Spain                                                      |
| Quero, Grazia Marina        | Researcher in Microbial Ecology                                                  | Stazione Zoologica Anton Dohrn di Napoli                                             | Italy                                                      |
| Quero, Jose Luis            | Assistant Professor of Forestry                                                  | University of Cordoba                                                                | Spain                                                      |
| QUERO, Solène               | PhD student in pedology                                                          | CEREGE                                                                               | France                                                     |
| Quesada Avendaño, Florencia | University Researcher, Adjunct Professor, Latin American and Development Studies | University of Helsinki                                                               | Finland                                                    |
| Quetstroey, Manon           | Biodiversity conservation                                                        | Leibniz Institute for Zoo and Wildlife Research                                      | Germany                                                    |
| Quevedo, Mario              | Senior lecturer; Ecology                                                         | Oviedo University                                                                    | Spain                                                      |
| Qui Minet, Zujaila          | Researcher                                                                       | Sorbonne University                                                                  | France                                                     |
| Quigley, Martin             | Executive Director, UCSC Arboretum & Botanic Garden                              | University of California, Santa Cruz                                                 | United States of America (the)                             |
| Quigley, William            | Child and Family Behavioral Health                                               | Dept of Health Hawaii [Retired]                                                      | United States of America (the)                             |
| Quillfeldt, Petra           | university professor, biologist                                                  | Justus Liebig University Giessen                                                     | Germany                                                    |
| Quinn, Andrew               | Postdoctoral Scientist, Cell Biology                                             | Universitié de Lausanne                                                              | Switzerland                                                |

|                              |                                                                                                                                                                         |                                                     |                                                            |
|------------------------------|-------------------------------------------------------------------------------------------------------------------------------------------------------------------------|-----------------------------------------------------|------------------------------------------------------------|
| Quinn, John                  | Zoology                                                                                                                                                                 | University College Cork                             | Ireland                                                    |
| Quiñones Gines, Laura        | Postgraduate student                                                                                                                                                    | Swansea university                                  | United Kingdom of Great Britain and Northern Ireland (the) |
| Quinson, Jonathan            | Researcher                                                                                                                                                              | University of Copenhagen                            | Denmark                                                    |
| Quintana-Ascencio, Pedro     | Professor, Ecology                                                                                                                                                      | University of Central Florida                       | United States of America (the)                             |
| Quintana-Cardona, Josep      | Paleontologist                                                                                                                                                          | Institut Catala de paleontologia Miquel Crusafont   | Spain                                                      |
| Quintão Fonseca, Ana Flávia  | Pesquisadora e professora na área de vulnerabilidade humana à mudança do clima, saúde e natureza, impacto do agronegócio e da mineração na saúde humana e ecossistêmica | Instituto Cordilheira                               | Brazil                                                     |
| Quintas Soriano, Cristina    | Postdoc                                                                                                                                                                 | Kassel University                                   | Germany                                                    |
| Quintela-Sabaris, Celestino  | PhD. Plant-Soil ecology                                                                                                                                                 |                                                     | Spain                                                      |
| Quintilhan, Manolo           | PhD student at IB/UNICAMP                                                                                                                                               | UNICAMP                                             | Brazil                                                     |
| Quintin, Luc                 | Physiology, anesthesia-critical care                                                                                                                                    | Cnrs-university of lyon 1                           | France                                                     |
| Quirion, Philippe            | researcher, economics                                                                                                                                                   | CNRS                                                | France                                                     |
| Quirk, Julia                 | Biomedical Scientist, PhD                                                                                                                                               | University of Iceland                               | Iceland                                                    |
| Quiroga, María Victoria      | Researcher                                                                                                                                                              | CONICET                                             | Argentina                                                  |
| Quiroga Canaviri, Jorge León | Doctor en Proyectos e Investigación Científica                                                                                                                          | UNIB Puerto Rico                                    | Bolivia (Plurinational State of)                           |
| Quque, Martin                | PhD candidate in Zoology                                                                                                                                                | CNRS - University of Strasbourg                     | France                                                     |
| R., Jorge                    | Researcher in Freshwater Ecosystems                                                                                                                                     | Universitat de Lleida                               | Spain                                                      |
| R. Silva, Rogerio            | Researcher                                                                                                                                                              | MPEG                                                | Brazil                                                     |
| Raab, Ted K.                 | Senior Investigator (Biogeochemistry)                                                                                                                                   | Carnegie Institution for Science                    | United States of America (the)                             |
| Rabaiotti, Daniella          | Researcher                                                                                                                                                              | Zoological Society of London                        | United Kingdom of Great Britain and Northern Ireland (the) |
| Rabatel, Antoine             | Research Scientist, Glaciology                                                                                                                                          | University of Grenoble Alpes                        | France                                                     |
| Rabbani, Khondkar            | Academic                                                                                                                                                                | Independent University, Bangladesh                  | Bangladesh                                                 |
| Rabelo, Rafael               | PhD student/Ecology                                                                                                                                                     | Instituto Nacional de Pesquisas da Amazônia         | Brazil                                                     |
| Rabie, Joseph                | Urban Studies                                                                                                                                                           |                                                     | France                                                     |
| Rabier, Robin                | PhD Ecology                                                                                                                                                             | Museum National d'Histoire Naturelle de Paris       | France                                                     |
| Rabier, Jacques              | Retired Associate Professor of plant Biology                                                                                                                            | Mediterranean institute of biodiversity and ecology | France                                                     |
| Rabouille, Sophie            | Scientist, PhD in biological oceanography                                                                                                                               | CNRS                                                | France                                                     |
| Rabovsky, Milena             | Professor of Cognitive Neuroscience                                                                                                                                     | University of Potsdam                               | Germany                                                    |
| Raby, Graham                 | Post-Doctoral Researcher, Fish Ecology                                                                                                                                  | –                                                   | Canada                                                     |
| Racimo, Fernando             | Assistant Professor of Population Genetics                                                                                                                              | University of Copenhagen                            | Denmark                                                    |
| Racker, Juan                 | Researcher                                                                                                                                                              | CONICET - Universidad Nacional de Córdoba           | Argentina                                                  |
| Raczka, Marco                | Postdoctoral Researcher                                                                                                                                                 | University of Amsterdam                             | Netherlands (the)                                          |
| Radanovic, Milica            | PhD Candidate - biogeosciences                                                                                                                                          | Washington State University                         | United States of America (the)                             |
| Radanovics, Sabine           | Meteorology                                                                                                                                                             |                                                     | France                                                     |
| Radchuk, Viktoriia           | Post-Doc, Ecology                                                                                                                                                       | Leibniz Institute for Zoo and Wildlife Research     | Germany                                                    |
| Raddi, Adriano               | Head of bioeconomy and governance program                                                                                                                               | Forest Science and Technology Center of Catalonia   | Spain                                                      |
| Rademacher, Laura            | Professor, Geological and Environmental Sciences                                                                                                                        | University of the Pacific                           | United States of America (the)                             |
| Radenac, Gilles              | Assistant Professor                                                                                                                                                     | UMR LIENSs - University of La Rochelle - CNRS       | France                                                     |

|                             |                                                                         |                                                                           |                                                            |
|-----------------------------|-------------------------------------------------------------------------|---------------------------------------------------------------------------|------------------------------------------------------------|
| Radermacher, Nico           | PhD Student / Animal ecologist                                          | J.F. Blumenbach Institute, Georg- August University, Göttingen            | Germany                                                    |
| Radford, Lucy               |                                                                         | Sumatran Orangutan Society                                                | United Kingdom of Great Britain and Northern Ireland (the) |
| Radinger, Johannes          | PostDoc                                                                 | University of Girona                                                      | Spain                                                      |
| Radjenovic, Jelena          | Environmental engineer, Research Professor                              | Catalan Institute for Water Research                                      | Spain                                                      |
| Rädle, Viola                | Environmental Physicist                                                 | Heidelberg University                                                     | Germany                                                    |
| Radloff, Frans              | Senior Lecturer                                                         | Cape Peninsula University of Technology                                   | South Africa                                               |
| Radominska, Monika          | PhD student                                                             | IGB Berlin                                                                | Germany                                                    |
| Radosta, Elisa              | Scientist/Biology                                                       | Bioscope / University of Geneva                                           | Switzerland                                                |
| Radoux, Julien              | Research fellow - remote sensing                                        | Université catholique de Louvain                                          | Belgium                                                    |
| Radovic, Jagos              | Research Associate                                                      | University of Calgary                                                     | Canada                                                     |
| Radtke, Hans                | Ph.D Natural Resources Economics                                        | Independent Natural Resources Consultant                                  | United States of America (the)                             |
| Radujkovic, Dajana          | PhD student in Biology                                                  | University of Antwerp                                                     | Belgium                                                    |
| Radwan, Jacek               | Professor in evolutionary biology                                       | Adam Mickiewicz University in Poznan                                      | Poland                                                     |
| Radzki, Dominik             | Medicine                                                                | Medical University of Gdansk                                              | Poland                                                     |
| Raavel, Valerie             | Associate researcher                                                    | French Institute of Pondicherry                                           | France                                                     |
| Raeymaekers, Joost          | Professor                                                               | Nord University                                                           | Norway                                                     |
| Ráez-Luna, Ernesto          | Ecologist                                                               | Universidad Antonio Ruiz de Montoya                                       | Peru                                                       |
| Rafa, Miquel                | Director of Land and Environment                                        | Fundació Catalunya La Pedrera                                             | Spain                                                      |
| Rafacho, Alex               | Associate professor                                                     | Federal University of Santa Catarina                                      | Brazil                                                     |
| Rafie, Karim                | PhD in Structural Biology, Postdoctoral researcher in infection biology | Umeå University                                                           | Sweden                                                     |
| Raga, Graciela B.           | Senior scientist in Atmospheric Sciences                                | Instituto de Ciencias de la Atmósfera y Cambio Climático/UNAM             | Mexico                                                     |
| Ragavander, Nanta           | Master Organic Agriculture                                              | Wageningen University                                                     | India                                                      |
| Ragazzola, Federica         | Senior Lecturer in Marine Biology                                       | Institute of Marine Sciences, School of Biology, University of Portsmouth | United Kingdom of Great Britain and Northern Ireland (the) |
| Ragnarsdottir, Kristin Vala | Professor of Earth Sciences                                             | University of Iceland                                                     | Iceland                                                    |
| Raguin, Gilles              | Médical doctor                                                          | IMEA                                                                      | France                                                     |
| Rahbé, Yvan                 | Research Director. Plant Health Sciences                                | INRA                                                                      | France                                                     |
| Rahbek, Carsten             | Professor in Biodiversity                                               | <a href="https://macroecology.ku.dk/">https://macroecology.ku.dk/</a>     | Denmark                                                    |
| Rahman, Syed                | Forestry                                                                | The Center for International Forestry Research (CIFOR)                    | Indonesia                                                  |
| Rahman, Anisur              | Program Specialist                                                      | Ontario Ministry of the Environment, Conservation and Parks               | Canada                                                     |
| Rahman, Md. Habibur         | PhD student                                                             | Kyoto University                                                          | Japan                                                      |
| Rahmani, Mohammad Hussein   | Professor assistant                                                     | Lorestan university                                                       | Iran (Islamic Republic of)                                 |
| Rai, Neha                   | PhD Student                                                             | University of Helsinki                                                    | Finland                                                    |
| Raicevich, Saša             | Researcher, Marine Ecology                                              | Istituto Superiore per la Protezione e la Ricerca Ambientale (ISPRA)      | Italy                                                      |
| Raimonet, Melanie           | Biogeochemistry                                                         | ECOLAB                                                                    | France                                                     |

|                                |                                                      |                                                                   |                                |
|--------------------------------|------------------------------------------------------|-------------------------------------------------------------------|--------------------------------|
| Raines, Adam John              | MS Environmental Science                             | University of Idaho                                               | United States of America (the) |
| Rainey, Paul                   | Director, Department of Microbial Population Biology | Max-Planck Institute for Evolutionary Biology                     | Germany                        |
| Rainham, Daniel                | Associate Professor                                  | Dalhousie University                                              | Canada                         |
| Rainville, Stéphane            | Vision Scientist/Vision Science                      | VizirLabs Consulting                                              | Canada                         |
| Raisch, Kurt                   | Biochemistry                                         | Max-Planck-Institut für Biochemie                                 | Germany                        |
| Raj, Kiran                     | Assistant Professor in Botany                        | SN College Kollam                                                 | India                          |
| Raja, Mathankumar              | PhD Student in Physics & Applied Mathematics         | University of Navarra                                             | Spain                          |
| Rajaei, Hossein                | Curator of Lepidoptera collection                    | Staatliches Museum für Naturkunde Stuttgart                       | Germany                        |
| Rajkaran, Anusha               | Senior Lecturer / Estuarine Ecology                  | University of the Western Cape                                    | South Africa                   |
| Rakes, Patrick                 | Ichthyologist                                        | Conservation Fisheries, Inc.                                      | United States of America (the) |
| Rakosy, Laszlo                 | Prof. Head of the Departmentn Taxonomy and Ecology   | Babes-Bolyai University, Cluj, Romania                            | Romania                        |
| Rakotomalala, Zafimahery       | Lecturer                                             | University of Antananarivo                                        | Madagascar                     |
| Rakowski, Chase                | PhD Candidate, Ecology                               | University of Texas at Austin                                     | United States of America (the) |
| Rakowski, Joseph               | Associate Professor, Oncology                        | Wayne State University School of Medicine, Detroit, MI            | United States of America (the) |
| Ralko, Arnaud                  | Associate professor in theoretical physics           | University Grenoble Alpes                                         | France                         |
| RAMADE, François               | Emeritus Professor of Ecology                        | University of Paris Sud                                           | France                         |
| Ramahavelo, Jean Luc           | Fisheries Programme Support Technician               |                                                                   | Madagascar                     |
| Ramalho, Emiliano              | Technical Scientific Director                        | Mamirauá Sustainable Development Institute                        | Brazil                         |
| Raman, Vanitha                 | Immunologist                                         |                                                                   | United States of America (the) |
| Ramaswamy, Jagannathan         | Retired Professor of Physics                         | The Institute of Mathematical Sciences, Chennai, India            | India                          |
| Ramaswamy, Ram                 | Visiting Professor, Chemistry                        | IIT Delhi                                                         | India                          |
| Rambaud, Maëlle                | Informatic manager                                   | National Museum of Natural History                                | France                         |
| Ramirez, Octavio               | Director, Biochemical Engineer                       | Biotechnology Institute, National Autonomous University of Mexico | Mexico                         |
| Ramirez, Claudio               | Associate Professor                                  | Universidad de Talca                                              | Chile                          |
| Ramirez, Jorge                 | Professor/Hydrologic Science                         | Colorado State university                                         | United States of America (the) |
| Ramirez, Jorge A               | Professor/Hydrologic Science                         | Colorado State University                                         | United States of America (the) |
| Ramírez, Miguel Ángel          | Scientific research                                  | INIA                                                              | Spain                          |
| Ramírez, Ana Cristina          | Professor                                            | Universidad Michoacana de San Nicolás de Hudalgi                  | Mexico                         |
| Ramirez Prado, Juan Sebastian  | postdoctoral fellow                                  | KU Leuven                                                         | Belgium                        |
| Ramirez-Macias, Deni           | Whale Shark Mexico Director / sharks and rays        | Whale Shark Mexico                                                | Mexico                         |
| Ramirez-Sanchez, Marcia        | Biology                                              | Universidad nacional autónoma de México                           | Mexico                         |
| Ramirez-Zierold, Jorge Alberto | Junior Researcher                                    | Institute for Marine Science and limnology                        | Mexico                         |
| Ramón, Giovanni                | Professor / Biology                                  | Universidad San Francisco de Quito                                | Ecuador                        |
| Ramos, Rita                    | Research fellow                                      | InBIO - CIBIO                                                     | Portugal                       |
| Ramos, Xavier                  | Professor of Economics                               | Universitat Autònoma Barcelona                                    | Spain                          |
| Ramos, Daniel                  | Ph.D student in Biology                              | J.F. Blumenbach Institute of Zoology and Anthropology             | Germany                        |
| RAMOS, SERGIO                  | PHD                                                  | UNIVERSITY OF ZURICH                                              | Switzerland                    |

|                         |                                               |                                                                |                                                            |
|-------------------------|-----------------------------------------------|----------------------------------------------------------------|------------------------------------------------------------|
| RAMOS, CARLOS HENRIQUE  | Professor                                     | UNICAMP                                                        | Brazil                                                     |
| RAMOS, ELOISA           | Associate Professor of Ecology                | University of Granada                                          | Spain                                                      |
| Ramos-Esplá, Alfonso A. | Senior Professor Zoology                      | University of Alicante                                         | Spain                                                      |
| Ramos-Musalem, Karina   | Assistant Professor, Physical Oceanography    | Instituto de Ciencias de la Atmósfera y Cambio Climático, UNAM | Mexico                                                     |
| Rampasek, László        | CEO / Engineer                                | OurOffset Nonprofit llc.                                       | Hungary                                                    |
| Ramsayer, Johan         | Evolution and Ecology                         |                                                                | France                                                     |
| Ramsden, David          | Head of Conservation                          | Barn Owl Trust                                                 | United Kingdom of Great Britain and Northern Ireland (the) |
| Randall, Jan            | Professor Emerita of Biology                  | San Francisco State University                                 | United States of America (the)                             |
| Randi, Ettore           | Professor, Conservation Biology               | University of Bologna                                          | Italy                                                      |
| Randi, Marco            | Professor - Cellular Biology                  | Federal University of Paraná                                   | Brazil                                                     |
| Rangel, Rodrigo         | PhD student in Permafrost Geophysics          | University of Wyoming                                          | Brazil                                                     |
| Ranits, Christian       | Master Student                                | University of Vienna                                           | Austria                                                    |
| Ranker, Tom             | Professor Emeritus                            | University of Hawaii at Manoa                                  | United States of America (the)                             |
| Rannap, Riinu           | researcher                                    | University of Tartu                                            | Estonia                                                    |
| Ranson, William         | Professor of Geoscience                       | Furman University                                              | United States of America (the)                             |
| Rao, sathyanarayan      | PhD student                                   | UCLouvain                                                      | India                                                      |
| Rao, Mrinalini Lianne   | Doctoral student                              | Institute of Structural Biology, Grenoble                      | France                                                     |
| Raos, Guido             | Full professor of chemistry                   | Politecnico di Milano                                          | Italy                                                      |
| Rapaport, Hannah        | PhD candidate (cognitive neuroscience)        | Macquarie University                                           | Australia                                                  |
| Rapp, Michael           | Professor for Social and Preventive Medicine  | University of Potsdam                                          | Germany                                                    |
| Rapp, Josephine         | PhD in Arctic Marine Microbiology             | University of Washington                                       | Germany                                                    |
| Raskin, Paul            | President/physicist                           | Tellus Institute                                               | United States of America (the)                             |
| Rassool, Bertrand       | Economist / Consultant                        | EcoWatt Company Limited                                        | Seychelles                                                 |
| Rastogi, Anshu          | Associate professor                           | Poznan University of Life Sciences                             | Poland                                                     |
| Ratay, Sarah            | M.S. Ecology                                  | UCLA                                                           | United States of America (the)                             |
| Ratcliffe, Brett        |                                               | University of Nebraska                                         | United States of America (the)                             |
| ratet, pascal           | Research director                             | CNRS                                                           | France                                                     |
| Rathgeber, Cyrille      | Researcher Forest Ecology                     | INRA                                                           | France                                                     |
| Rathnayake, Kaushalya   | Assistant Lecturar/demonstrator - Biology     | Rajarata University                                            | Sri Lanka                                                  |
| rathore, ishan          | Researcher                                    | IIT-Bombay                                                     | India                                                      |
| Ratier Backes, Amanda   | Ecology                                       |                                                                | Brazil                                                     |
| Ratti, John             | Research Sci3ntist and Orofessor, Retired     | University of Idaho                                            | United States of America (the)                             |
| Rattner, Amir           |                                               | Johns Hopkins University                                       | United States of America (the)                             |
| Ratzbor, Ronja          | PhD Student                                   | University of Tuebingen                                        | Germany                                                    |
| Rau, E-Ping             | PhD student                                   | University of Toulouse 3                                       | France                                                     |
| Rau, Jaime R.           | Full Professor/Ecologist                      | Universidad de Los Lagos                                       | Chile                                                      |
| Rau, Gabriel            | Assistant Professor                           | Karlsruhe Institute of Technology                              | Germany                                                    |
| Raupp, Jamie            | Fisheries and Wildlife - Conservation biology | Michigan State University                                      | United States of America (the)                             |
| Rausch, Sebastian       | Professor, Energy and Environmental Economics |                                                                | Switzerland                                                |

|                               |                                                                 |                                                                            |                                                            |
|-------------------------------|-----------------------------------------------------------------|----------------------------------------------------------------------------|------------------------------------------------------------|
| Rausing, Lisbet               | Science Historian                                               |                                                                            | United Kingdom of Great Britain and Northern Ireland (the) |
| Raven, Nynke                  | Molecular ecology                                               | Deakin University                                                          | Australia                                                  |
| Ravetto Enri, Simone          | PhD, Rangeland Ecology and Management                           | University of Torino, Department of Agricultural, Forest and Food Sciences | Italy                                                      |
| Ravichandran, Ramanibai       | Former Professor and Head Dept of Zoology                       | University of Madras Chennai                                               | India                                                      |
| Raw, Anthony                  | Professor                                                       | Universidade estadual de Santa Cruz, ilhéus                                | Brazil                                                     |
| Rawson, Andrew                | Adjunct Associate Professor                                     | Charles Sturt University                                                   | Australia                                                  |
| Ray Mukherjee, Jayanti        | Associate Professor                                             | Azim Premji University                                                     | India                                                      |
| Ray Sarkar, Sneha             | PhD Student                                                     | University of Copenhagen                                                   | Denmark                                                    |
| Raymond, Michel               | Evolutionary anthropology                                       | CNRS                                                                       | France                                                     |
| Raymundo, Laurie              | Professor, Marine Ecology                                       | University of Guam Marine Laboratory                                       | Guam                                                       |
| Rayne, Aisling                |                                                                 | University of Canterbury                                                   | New Zealand                                                |
| Raynolds, Martha              | Researcher - Arctic vegetation                                  | University of Alaska Fairbanks                                             | United States of America (the)                             |
| Rayo, Enrique                 | PhD student                                                     | University of Zürich                                                       | Switzerland                                                |
| Razgour, Orly                 | Lecturer in Ecology                                             | University of Southampton                                                  | United Kingdom of Great Britain and Northern Ireland (the) |
| Re, Barbara                   | PostDoc in Applied Mathematics                                  | University of Zurich                                                       | Switzerland                                                |
| Re, Simona                    | Research fellow, Biologist                                      | National Research Council of Italy                                         | Italy                                                      |
| Reading, Richard              | Director of Research and Conservation                           | Butterfly Pavilion                                                         | United States of America (the)                             |
| Ready, Jonathan               | Associate Professor                                             | Universidade Federal do Pará                                               | Brazil                                                     |
| Reardon, James T.             | Scientist - conservation ecologist                              | Department of Conservation                                                 | New Zealand                                                |
| Reardon, James                | Scientist: herpetology, invasive species ecology and management | Department of Conservation                                                 | New Zealand                                                |
| Reasoner, Mel                 | Earth and Atmospheric Sciences                                  | Climatic Resources Consulting                                              | Canada                                                     |
| Reay, Dave                    | Professor of Carbon Management                                  | University of Edinburgh                                                    | United Kingdom of Great Britain and Northern Ireland (the) |
| Rebeillard, Florian           | Neuroscience PhD                                                | Inserm                                                                     | France                                                     |
| Rebelo, Maria Teresa          | Assistant Professor / Integrated Pest Management                | FCUL                                                                       | Portugal                                                   |
| Rebelo, Rui                   | Professor                                                       | Faculty of Sciences University of Lisbon                                   | Portugal                                                   |
| Rebelo, Anthony               | Conservation Biologist                                          | South African National Biodiversity Institute                              | South Africa                                               |
| Rebelo, Alanna                | Postdoctoral Researcher                                         | Stellenbosch University                                                    | South Africa                                               |
| Rebelo, José Eduardo          | Assistant Professor, Biology                                    | Universidade de Aveiro                                                     | Portugal                                                   |
| Reboa, Anna                   |                                                                 | University of Genoa                                                        | Italy                                                      |
| Reboleira, Ana Sofia          | Associate Professor                                             | Natural History Museum of Denmark, University of Copenhagen                | Denmark                                                    |
| Rebollo-Hernanz, Miguel       | PhD student in Food Chemistry                                   | Universidad Autónoma de Madrid                                             | Spain                                                      |
| Rebstock, Ginger              | Research Scientist, marine ecology                              | University of Washington                                                   | United States of America (the)                             |
| Recalde-Salas, Angela         | Quantitative ecologist                                          | Curtin University                                                          | Australia                                                  |
| Recasens, Jordi               | Full Professor. Agronomy and Plant Ecology                      | University of Lleida                                                       | Spain                                                      |
| Recchia, Francesco            | Researcher, nuclear physics                                     | University of Padova                                                       | Italy                                                      |
| Recco-Pimentel, Shirlei Maria | Professor                                                       | Universidade Estadual de Campinas, São Paulo                               | Brazil                                                     |

|                                 |                                                                      |                                                                        |                                                            |
|---------------------------------|----------------------------------------------------------------------|------------------------------------------------------------------------|------------------------------------------------------------|
| receveur, auore                 | PhD student                                                          | IRD & SPC                                                              | New Caledonia                                              |
| Rech, Andre Rodrigo             | Professor of Ecology                                                 | Universidade Federal dos Vales do Jequitinhonha e Mucuri               | Brazil                                                     |
| Rech, Sabine                    | Principal Investigator, Marine biology/ ecology                      | ESMOI research center, Universidad Católica del Norte, Campus Coquimbo | Chile                                                      |
| Reche, Isabel                   | Professor of Ecology                                                 | Universidad de Granada                                                 | Spain                                                      |
| Recher, Harry                   | Senior Fellow                                                        | The Australian Museum                                                  | Australia                                                  |
| Rechisky, Erin                  | Research Scientist                                                   | Kintama Research Services                                              | Canada                                                     |
| Reczynska, Kamila               | Vegetation Ecology                                                   | University of Wroclaw                                                  | Poland                                                     |
| Redden, George                  | retired, environmental science and engineering                       | Montana State University                                               | United States of America (the)                             |
| Reddy, Lashantha                | Science Education                                                    | Curro Aurora                                                           | South Africa                                               |
| Redlich, Sarah                  | Postdoc, Agricultural Ecology                                        | University of Wuerzburg                                                | Germany                                                    |
| Redmond, Ian                    | Ambassador                                                           | UN Convention on Migratory Species                                     | United Kingdom of Great Britain and Northern Ireland (the) |
| Redondo, Tomas                  | Researcher Behavioural Ecology                                       | Estacion Biologica de Doñana, CSIC                                     | Spain                                                      |
| Redondo Díaz, Míriam            | Biology teacher                                                      | Departament d'Educació                                                 | Spain                                                      |
| Redü, Darlan Rutz               | Phd Candidate                                                        | Universidade de São Paulo (USP)                                        | Brazil                                                     |
| Reed, David                     | Curator of Mammals                                                   | University of Florida                                                  | United States of America (the)                             |
| Reed, James                     | Scientist                                                            | Center for International Forestry Research                             | Indonesia                                                  |
| Reed, Thomas                    | Senior Lecturer in Zoology                                           | University College Cork                                                | Ireland                                                    |
| Reemer, Menno                   | Entomologist                                                         | Naturalis Biodiversity Center                                          | Netherlands (the)                                          |
| Reepmeyer, Christian            | Senior Lecturer                                                      | James Cook University                                                  | Australia                                                  |
| Rees, Jean-Francois             | Professor                                                            | University of Louvain                                                  | Belgium                                                    |
| Rees, William                   | Professor emeritus, ecological economics and human ecology           | University of British Columbia                                         | Canada                                                     |
| Rees, Robert                    | Professor of Agriculture and Climate Change                          | Scotland's Rural College                                               | United Kingdom of Great Britain and Northern Ireland (the) |
| Rees, David                     | Senior Engineer, Marine Biodiversity                                 | University of Bergen                                                   | Norway                                                     |
| Rees, Peter                     | Atmospheric researcher                                               | RMIT                                                                   | Australia                                                  |
| Rees, Jasper                    | Senior Advisor: Bioeconomy                                           | Independent                                                            | South Africa                                               |
| Refoyo Martínez, Alba           | PhD                                                                  | Globe institute. Geogenetics                                           | Denmark                                                    |
| Refrégier, Guislaine            | Ass. Prof                                                            | Univ. Paris-Sud                                                        | France                                                     |
| Regalado Fernandez, Omar Rafael | PhD Earth Sciences                                                   | University College London                                              | Mexico                                                     |
| Regard, Vincent                 | Earth Sciences - Lecturer                                            | Université de Toulouse                                                 | France                                                     |
| REGNARD, Jean-Luc               | Professor (emeritus)                                                 | Montpellier SupAgro                                                    | France                                                     |
| Regts, Guus                     | Mathematician                                                        | University of Amsterdam                                                | Netherlands (the)                                          |
| Regula, Lis                     | Lecturer                                                             | University of Dayton                                                   | United States of America (the)                             |
| Reguzzoni, Marcella             | university researcher                                                | University of Insubria                                                 | Italy                                                      |
| Rehbein Lucero, José Andres     | Research Assistant                                                   | The University of Queensland                                           | Australia                                                  |
| Rehm, Eric                      | Senior Research Associate                                            | Université Laval                                                       | Canada                                                     |
| Rehman, Attiq ur                | Student at Erasmus Mundus Master Program in Plant Breeding (emPLANT) | The University of Helsinki                                             | Finland                                                    |



|                      |                                                           |                                                                   |                                                            |
|----------------------|-----------------------------------------------------------|-------------------------------------------------------------------|------------------------------------------------------------|
| Rehren, Oliver       | Researcher in Psychology and Mediapsychology              | Institution for Media Research, University of Technology Chemnitz | Germany                                                    |
| Rehren, Jennifer     | Postdoctoral Researcher                                   | Agrocampus Ouest                                                  | France                                                     |
| Reichard, Ulrich     | Professor for Anthropology                                | Southern Illinois University Carbondale                           | United States of America (the)                             |
| Reiche, Johannes     | Assistant Professor                                       | Wageningen University                                             | Netherlands (the)                                          |
| Reiche, Johannes     | Assistant Professor                                       | Wageningen University                                             | Netherlands (the)                                          |
| Reichhart, Jean-Marc | Emeritus Professor of Developmental Biology               | University of Strasbourg                                          | France                                                     |
| Reid, Lee            | Post-doctoral Research Fellow, Neuroscience               |                                                                   | Australia                                                  |
| Reid, Carolyn        | Environmental Specialist                                  | Trent University                                                  | Canada                                                     |
| Reid, J. Leighton    | Restoration Ecologist                                     | Missouri Botanical Garden                                         | United States of America (the)                             |
| Reid, Janice         | Wildlife Biologist                                        | Umpqua Watersheds                                                 | United States of America (the)                             |
| Reid, Donald         | Conservation Biologist                                    | Wildlife Conservation Society Canada                              | Canada                                                     |
| Reid, Robin          | Professor                                                 | Colorado State University                                         | United States of America (the)                             |
| Reid, Kimberley      | PhD Researcher - Rainfall Extremes                        |                                                                   | Australia                                                  |
| Reidsma, Pytrik      | Associate Professor Plant Production Systems              | Wageningen University                                             | Netherlands (the)                                          |
| Reijerd, Bas         | Chemistry                                                 | Utrecht University                                                | Netherlands (the)                                          |
| Reijnders, Mirjam    | PhD student                                               | Vrije Universiteit Amsterdam                                      | Netherlands (the)                                          |
| Reimer, James        | Associate Professor                                       | University of the Ryukyus                                         | Japan                                                      |
| Reimer, Tormey       | PhD Candidate, Ecological Modelling                       | University of Tasmania                                            | Australia                                                  |
| Reina, Orlando       | Licenciado en Administración de la Fauna Silvestre        | Instituto Veterinario y de Ecología                               | Mexico                                                     |
| Reinacher, Kai       | Plant Science                                             | Institut of Organic Agriculture (FiBL)                            | Switzerland                                                |
| Reineke, Annette     | Professor Agriculture                                     | Geisenheim University                                             | Germany                                                    |
| Reinhardt, Liam      | Lecturer in environmental science                         | University of Exeter                                              | United Kingdom of Great Britain and Northern Ireland (the) |
| Reinhold, Steffi     | PhD student                                               | University of Liverpool                                           | United Kingdom of Great Britain and Northern Ireland (the) |
| Reinschmidt, Svenja  | Graduate Student - Plant Ecology                          | RPTU Kaiserslautern                                               | Germany                                                    |
| Reis, Roberto        | Full Professor                                            | Pontificia Universidade Católica do Rio Grande do Sul             | Brazil                                                     |
| Reisinger, Ryan      | Postdoctoral fellow, Ecology                              | CEBC, UMR 7372 du CNRS-Université de La Rochelle                  | France                                                     |
| Reiss, John          | Professor of Zoology                                      | Cal Poly Humboldt                                                 | United States of America (the)                             |
| Reiter, Bernhard     | Applied Systems Scientist, MSc Geography                  | University of Wisconsin-Milwaukee                                 | Germany                                                    |
| Reiter, Karsten      | scientific staff                                          | TU Darmstadt, Institute of Applied Geoscience                     | Germany                                                    |
| Reither, Jack        | BForSci (Hons), DNA transfer in a casework context        | Deakin University                                                 | Australia                                                  |
| Reitsma, Leonard     | Professor of Ecology                                      | Plymouth State University                                         | United States of America (the)                             |
| REJAUD, Alexandre    | PhD student in evolutionary biology                       | University Toulouse III Paul Sabatier                             | France                                                     |
| Rejmankova, Eliska   | Professor                                                 | University of California Davis                                    | United States of America (the)                             |
| Rekker, Saphira      | Dr                                                        | University of Queensland                                          | Australia                                                  |
| Relton, Clare        | Health                                                    | Queen Mary University of London                                   | United Kingdom of Great Britain and Northern Ireland (the) |
| Remans, Kim          | Head of Protein Expression and Purification Core Facility | EMBL                                                              | Germany                                                    |

|                                   |                                                                                                     |                                                                                                    |                                                            |
|-----------------------------------|-----------------------------------------------------------------------------------------------------|----------------------------------------------------------------------------------------------------|------------------------------------------------------------|
| Remelgado, Ruben                  | Macroecology                                                                                        | German Centre for Integrative Biodiversity Research (iDiv)                                         | Germany                                                    |
| Remenak, Brad                     | Engineer                                                                                            |                                                                                                    | United States of America (the)                             |
| Rementilla, Gpw. Bernard Bautista | Chairman & CEO/Professor                                                                            | World Center for Ocean Power & Energy Research and Green Technology Development Inc.               | Philippines (the)                                          |
| Rementilla, Gpw Bernard Bautista  | Founder/Chairman/CEO. Climate Change Engg Scientist: MEPS-CMS Project (NRE & Facilities) CONSULTANT | World Center for Ocean Power and Energy Research & Green Technology Development Inc (WC-OPER-GTDI) | Philippines (the)                                          |
| Remigy, Jean-Christophe           | Professor, Chemical Engineering                                                                     | Laboratoire de Génie Chimique, Université Paul Sabatier                                            | France                                                     |
| Remke, Eva                        | Senior scientist - landscape ecology                                                                | B-WARE                                                                                             | Netherlands (the)                                          |
| Remke, Michael                    | Lecturer of Biology                                                                                 | Fort Lewis College                                                                                 | United States of America (the)                             |
| Remm, Liina                       | Research fellow                                                                                     | University of Tartu                                                                                | Estonia                                                    |
| Remus-Emsermann, Mitja            | Microbiologist                                                                                      | School of Biological Sciences, University of Canterbury                                            | New Zealand                                                |
| Remy, Denise                      | Professor of Surgery and Ethics                                                                     | VetAgro Sup                                                                                        | France                                                     |
| Renart, Jaime                     | Molecular biologist. Retired                                                                        |                                                                                                    | Spain                                                      |
| Renaudin, Jean-Pierre             | Professor of biology                                                                                | University of Bordeaux                                                                             | France                                                     |
| Rendell, Luke                     | Reader in Biology                                                                                   | University of St Andrews                                                                           | United Kingdom of Great Britain and Northern Ireland (the) |
| RENDON RESTREPO, Steven           | PhD student in Astrophysics                                                                         | Laboratoire d'Astrophysique de Marseille - Aix-Marseille-Université                                | France                                                     |
| Renn, Ortwin                      | Scientific Director                                                                                 | Institute of Advanced Sustainability Studies                                                       | Germany                                                    |
| Renne, Dr. Ian J.                 | Associate Professor of Ecology                                                                      | Youngstown State University                                                                        | United States of America (the)                             |
| Renner, Kathrin                   | Geoscientist                                                                                        | Eurac Research                                                                                     | Italy                                                      |
| Rennó Braga, Raul                 | Ph. D. / Ecology and Conservation                                                                   | Universidade Federal do Paraná                                                                     | Brazil                                                     |
| Renoud, Julie                     | PhD                                                                                                 | IRSAMC-Université Paul Sabatier                                                                    | France                                                     |
| Renouf, Jean S.                   | Lecturer, Politics and International Relations                                                      | Southern Cross University                                                                          | Australia                                                  |
| Renwick, Katherine                | Ecologist                                                                                           | Montana State University                                                                           | United States of America (the)                             |
| Renwick, James                    | Professor of Physical Geography & Climate Science                                                   | Victoria University of Wellington                                                                  | New Zealand                                                |
| Reponen, Tuulia                   | PhD student in human geography                                                                      | University of Eastern Finland                                                                      | Finland                                                    |
| Reppucci, Juan                    | Researcher                                                                                          | CONICET                                                                                            | Argentina                                                  |
| Requena Suarez, Daniela           | PhD Candidate                                                                                       | Wageningen University and Reserach                                                                 | Netherlands (the)                                          |
| Requena-Mullor, Juan Miguel       | Post Doctoral Research Associate                                                                    | Boise State University                                                                             | United States of America (the)                             |
| Reques, Ricardo                   | Profesor Sustituto Interino                                                                         | Área de Ecología. Universidad de Córdoba                                                           | Spain                                                      |
| Requier, Fabrice                  | Postdoctoral Research Associate                                                                     | University of Würzburg                                                                             | Germany                                                    |
| Resende, Pedro                    | Associate Professor of Mathematics                                                                  | Instituto Superior Tecnico, Univ. Lisboa                                                           | Portugal                                                   |
| Resende, Fernando                 | Postdoc in Ecology                                                                                  | Universidade Federal de Minas gerais                                                               | Brazil                                                     |
| Resende, Angélica                 | PhD in Botany                                                                                       | National Institute of Amazonian Research                                                           | Brazil                                                     |
| Ressouche, Eric                   | Physics                                                                                             | CEA Grenoble                                                                                       | France                                                     |
| Rest, Armin                       | Associate Astronomer with Tenure                                                                    | STScI                                                                                              | United States of America (the)                             |
| Restrepo González, Alejandro      | PhD student in Ecology and Conservation                                                             | Federal University of Paraná                                                                       | Brazil                                                     |

|                          |                                                              |                                                                                      |                                                            |
|--------------------------|--------------------------------------------------------------|--------------------------------------------------------------------------------------|------------------------------------------------------------|
| Restrepo Sáenz, Claudia  | Consultant                                                   | Independent                                                                          | Colombia                                                   |
| Restrepo-Tarquino, Inés  | Investigadora                                                | Instituto Cinara/Universidad del Valle                                               | Colombia                                                   |
| Retailleau, Aude         | Post-doctorant in Neuroscience                               |                                                                                      | France                                                     |
| Retelle, Michael         | Professor of Geology_Quaternary Geology and Paleoclimatology | Bates College and University Centre in Svalbard                                      | United States of America (the)                             |
| Retkowski, Alexandra     | Professor for Social Work                                    | BTU                                                                                  | Germany                                                    |
| Retter, Alice            | PhD                                                          | University of Vienna                                                                 | Austria                                                    |
| Retuerto, Rubén          | Full Professor / Ecology                                     | Universidade de Santiago de Compostela                                               | Spain                                                      |
| Reul, Andreas            | Profesor Titular de UNiversidad                              | Universidad de Málaga                                                                | Spain                                                      |
| Reuland, Andreas         | Ophthalmology                                                |                                                                                      | Germany                                                    |
| Reusche, Gary            | Professor, Agricultural Science and Agribusiness Expert      | World Bank group IFC                                                                 | Ukraine                                                    |
| Revers, Frederic         | Scientist                                                    | INRA                                                                                 | France                                                     |
| Reverté Saiz, Sara       | Researcher                                                   |                                                                                      | Spain                                                      |
| Revilla, Eloy            | Investigador científico                                      | Estacion Biologica de Doñana CSIC                                                    | Spain                                                      |
| Revillion, Jean Philippe | Professor                                                    | Federal University of Rio Grande do Sul                                              | Brazil                                                     |
| Revuelto, Jesús          | Postdoctoral researcher                                      | Pyrenean Institute of Ecology (IPE-CSIC)                                             | Spain                                                      |
| Rexin, Daniel            | Post-Doc                                                     | MPI for Evolutionary Biology                                                         | Germany                                                    |
| Rey, Pierre-Louis        | Assistant professor/PhD                                      | Idyst, UNIL                                                                          | France                                                     |
| Rey, Olivier             | Assistant professor                                          | Université de Perpignan Via Domitia                                                  | France                                                     |
| Reyes, Rene              | Researcher in Forest Economy (Ph.D.)                         | Instituto Forestal                                                                   | Chile                                                      |
| Reyes, Alejandra         | Sustainability                                               | UNAM                                                                                 | Mexico                                                     |
| Reyes-García, Victoria   | ICREA Research Professor (Anthropology)                      | Institute of Environmental Science and Technology, Universitat Autònoma de Barcelona | Spain                                                      |
| Reyes-Puig, Carolina     | Professor                                                    | Universidad San Francisco de Quito                                                   | Ecuador                                                    |
| Reynaert, Simon          | PhD Candidate                                                | University of Antwerp                                                                | Belgium                                                    |
| Reynaud, Enrique         | Professor                                                    | Instituto de Biotecnología, Universidad Nacional Autónoma de México                  | Mexico                                                     |
| Reynolds, John           | Managing Director and Glacial Hazard Specialist              | Reynolds International Ltd                                                           | United Kingdom of Great Britain and Northern Ireland (the) |
| Reynolds, Jessie         | Master's Candidate - Biology and aquatic ecotoxicology       | Queen's University                                                                   | Canada                                                     |
| Reynolds, Heather        | Associate Professor, Biology                                 | Indiana University                                                                   | United States of America (the)                             |
| Reynolds, Barbara        | Professor of Environmental Studies, retired                  | UNCAsheville                                                                         | United States of America (the)                             |
| Reynolds, Samantha       | PhD Candidate                                                | The University of Queensland                                                         | Australia                                                  |
| Rezende, Felipe          | MSc in Ecology                                               | State University of Campinas (UNICAMP)                                               | Brazil                                                     |
| Rezende, Andréia         | Professor                                                    | Universidade Estadual Paulista (UNESP)                                               | Brazil                                                     |
| Rhea, Tina               | MS Wildlife Biology                                          |                                                                                      | United States of America (the)                             |
| Rheinberger, Klaus       | Researcher and Lecturer                                      | FH Vorarlberg University of Applied Sciences                                         | Austria                                                    |
| Rheinschmidt, Rolf       | Scientific Assistant Life Sciences                           | Rhine-Waal University of Applied Sciences                                            | Germany                                                    |
| Rheinwald, Goetz         | Leader Orn. Department, retired                              | Zoolog. Forschungsmuseum A. Koenig, Bonn                                             | Germany                                                    |
| Rhoades, Fred M.         | Mycologist, retired                                          | Western Washington University                                                        | United States of America (the)                             |

|                                |                                            |                                                                  |                                                            |
|--------------------------------|--------------------------------------------|------------------------------------------------------------------|------------------------------------------------------------|
| Rhodes, Chris                  | Professor, Chemistry                       | Fresh-lands Environmental Actions                                | United Kingdom of Great Britain and Northern Ireland (the) |
| Riani, Cristina                |                                            | UC Santa Cruz                                                    | United States of America (the)                             |
| Riascos, José M.               | Professor, Marine Ecology                  | Universidad de Antioquia                                         | Colombia                                                   |
| Riaz, Asher                    | PhD Candidatue at IMAS                     | IMAS, University of Tasmania, Australia.                         | Australia                                                  |
| Ribas, Camila                  | Researcher / Biodiversity                  | Instituto Nacional de Pesquisas da Amazônia                      | Brazil                                                     |
| Ribau Mendes, Vinícius         | Professor                                  | Institute of Marine Science - Federal University of São Paulo    | Brazil                                                     |
| Ribeiro, Ricardo               | Research Fellows                           | Instituto Nacional da Mata Atlântica                             | Brazil                                                     |
| Ribeiro, Wagner                | Professor Geography                        | University of Sao Paulo                                          | Brazil                                                     |
| Ribeiro, Frank                 | Associate Professor                        | Universidade Federal do Oeste do Pará                            | Brazil                                                     |
| Ribeiro, Ângela M.             | Evolutionary Biology                       | University of Copenhagen                                         | Denmark                                                    |
| Ribeiro da Costa, Tércio       | Chemistry                                  | IFCE                                                             | Brazil                                                     |
| Ribeiro da Silva, Fernanda     | post doc                                   | UFsC                                                             | Brazil                                                     |
| Ribeiro Miranda Antunes, Elisa | PhD Student                                | University of Campinas                                           | Brazil                                                     |
| Ribeiro Prist, Paula           | Pós-Doc/ Landscape Ecologist               | University of São Paulo                                          | Brazil                                                     |
| RiBSTEIN, Pierre               | Professor                                  | Sorbonne University                                              | France                                                     |
| Rich, Sara                     | Assistant Professor                        | Coastal Carolina University                                      | United States of America (the)                             |
| Rich, Anina                    | Professor of Cognitive Science             | Macquarie University                                             | Australia                                                  |
| Rich, Bob                      | Psychology (retired)                       |                                                                  | Australia                                                  |
| Rich, Joe                      | B.S. Chemical Engineering                  | Missouri University of Science & Technology                      | United States of America (the)                             |
| Rich, Albert                   | Independent research / Mathematician       | —                                                                | United States of America (the)                             |
| richard, julien                | Oceanography engineer                      | Seaneo                                                           | France                                                     |
| Richard, Alison                | Professor of Anthropology emerita          | Yale University                                                  | United States of America (the)                             |
| Richard, Freddie-Jeanne        | Assistante Professor                       | Université de Poitiers                                           | France                                                     |
| Richard, Hervé                 | Research Director, paleoenvironmentalist   | CNRS-Chrono-environment - University of Franche-Comté - Besançon | France                                                     |
| Richard-Molard, Céline         | Senior Scientist in Crop physiology        | INRA                                                             | France                                                     |
| Richards, Claire               | Postdoctoral Fellow, Health Services       | University of Washington                                         | United States of America (the)                             |
| Richards, Jane                 | Marine Biologist                           | Fowey Harbour Commissioners                                      | United Kingdom of Great Britain and Northern Ireland (the) |
| Richardson, Michael            | Ecologist, mycologist                      | Independent                                                      | United Kingdom of Great Britain and Northern Ireland (the) |
| Richardson, Vanessa            | Research Associate                         | UEA                                                              | United Kingdom of Great Britain and Northern Ireland (the) |
| Richardson, Leif               | Ecologist                                  | University of Vermont                                            | United States of America (the)                             |
| Richerson, Hannah              | Environmental Science and Law              | University of Wisconsin-Madison                                  | United States of America (the)                             |
| Richert, Laura                 | Associate Professor in Public Health       | Univ Bordeaux                                                    | France                                                     |
| Richings, Nadine               | Teaching Associate                         | Monash University                                                | Australia                                                  |
| Richman, David                 | College Professor Emeritus                 | New Mexico State University                                      | United States of America (the)                             |
| Richmond, Courtney             | Professor of Biological Sciences           | Rowan University                                                 | United States of America (the)                             |
| Richmond, James                | Teaching Support Fellow, School of Physics | The University of Melbourne                                      | Australia                                                  |

|                             |                                                                                                                                                                       |                                                           |                                                            |
|-----------------------------|-----------------------------------------------------------------------------------------------------------------------------------------------------------------------|-----------------------------------------------------------|------------------------------------------------------------|
| Richter, Philipp Konstantin | PhD student/biochemist                                                                                                                                                | Leipzig University                                        | Germany                                                    |
| Richter, Andreas            | Professor, Ecology                                                                                                                                                    | University of Vienna                                      | Austria                                                    |
| Rickard, Nikki              | Adjunct Associate Professor                                                                                                                                           | Monash University                                         | Australia                                                  |
| Rickert-Sperling, Silke     | Professor of Cardiovascular Genetics                                                                                                                                  | Charite - University Medicine Berlin                      | Germany                                                    |
| Rico, Eugenio               | University professor and researcher. Ecology                                                                                                                          | Universidad Autónoma de Madrid                            | Spain                                                      |
| Rico Cernohorska, Adriana   | Docente investigador                                                                                                                                                  | Instituto de Ecología - UMSA                              | Bolivia (Plurinational State of)                           |
| Rico Ramirez, Adriana       | Postdoc                                                                                                                                                               | UC BERKELEY                                               | United States of America (the)                             |
| RIDAME, Celine              | Oceanography                                                                                                                                                          | LOCEAN-SU-IPSL                                            | France                                                     |
| Riddle, Brett               | Professor Emeritus of Life Sciences                                                                                                                                   | University of Nevada Las Vegas                            | United States of America (the)                             |
| Ridenour, Natasha           | PhD Student                                                                                                                                                           | University of Alberta                                     | Canada                                                     |
| Riding, Timothy             | Marine Scientist                                                                                                                                                      | Ministry for the Environment                              | New Zealand                                                |
| Ridley, Amanda              | Associate Professor, Behavioural Ecology                                                                                                                              | University of Western Australia                           | Australia                                                  |
| Ridwansyah, Muhammad        | Head, Center of Excellent Higher Education for Investment and Business Planning Agroindustry and Environment/Environmental and Natural Resources Economics and Energy | University of Jambi                                       | Indonesia                                                  |
| Riede, Moritz               | Professor                                                                                                                                                             | University of Oxford, UK                                  | United Kingdom of Great Britain and Northern Ireland (the) |
| Riede, Felix                | Professor of Environmental Humanities and Climate Change Archaeology                                                                                                  | Aarhus University                                         | Denmark                                                    |
| Riedel, Christian           | Lecturer, Microbiology                                                                                                                                                | Ulm University                                            | Germany                                                    |
| Riedel, Julia               | PhD student                                                                                                                                                           | Max Planck Institute for evolutionary Anthropology        | Germany                                                    |
| Riedel, Jendrian            | PhD student/Biology                                                                                                                                                   | James Cook University                                     | Australia                                                  |
| Riedl, Anna Luisa           | PhD in biophysical chemistry                                                                                                                                          | Georg-August-University Göttingen                         | Germany                                                    |
| Riedstra, Bernd             | scientist                                                                                                                                                             |                                                           | Netherlands (the)                                          |
| Riehl, Jennifer             | Postdoctoral Fellow                                                                                                                                                   | University of Wisconsin-Madison                           | United States of America (the)                             |
| Riekenberg, Philip          | Postdoctoral Researcher                                                                                                                                               | NIOZ Royal Netherlands Institute for Sea Research         | Netherlands (the)                                          |
| Ries, Christian             | Curator at Department of Ecology                                                                                                                                      | National Museum of Natural History                        | Luxembourg                                                 |
| Rieser, Philipp             | phd student, Quantum Physics                                                                                                                                          | University of Vienna                                      | Austria                                                    |
| Riess, Christoph            | Master of Physics                                                                                                                                                     | Institute for Environmental Physics, Heidelberg           | Germany                                                    |
| Riesz, Jenny                | Physics                                                                                                                                                               | University of Queensland                                  | Australia                                                  |
| Riffo, Valentina            | Licenciada en Biología                                                                                                                                                | Universidad de Chile                                      | Chile                                                      |
| Rifkin, Riaan Francois      | Research Fellow/Palaeo-Microbiology                                                                                                                                   | University of Pretoria                                    | South Africa                                               |
| Riganti Fulginei, Francesco | Full Professor                                                                                                                                                        | Roma Tre University                                       | Italy                                                      |
| Rigg, Robin                 | Zoologist                                                                                                                                                             | Slovak Wildlife Society                                   | Slovakia                                                   |
| Rigo, Gabriele              | PhD Student, Physics                                                                                                                                                  | Syracuse University                                       | United States of America (the)                             |
| Rigolot, Eric               | Fire ecology                                                                                                                                                          | French National Institute of Agricultural Research (INRA) | France                                                     |
| Riina, Ricarda              | Research Scientist                                                                                                                                                    | Real Jardín Botánico (RJB), CSIC                          | Spain                                                      |
| Rijkers, Ger                | Prof Biomedical and Life Sciences                                                                                                                                     | University College Roosevelt                              | Netherlands (the)                                          |
| Rijsberman, Frank           | Director General                                                                                                                                                      | Global Green Growth Institute                             | Korea (the Republic of)                                    |
| Rijsdijk, Kenneth           | Researcher Lecturer in Biogeography                                                                                                                                   | University of Amsterdam, IBED                             | Netherlands (the)                                          |

|                        |                                                                                                    |                                                                                    |                                                               |
|------------------------|----------------------------------------------------------------------------------------------------|------------------------------------------------------------------------------------|---------------------------------------------------------------|
| Rimbach, Rebecca       | Postdoc                                                                                            |                                                                                    | Germany                                                       |
| Rimcheska, Biljana     | PhD student                                                                                        | Institute of Biodiversity and Ecosystem Research,<br>Bulgarian Academy of Sciences | Macedonia, Republic of (the former<br>Yugoslavia)             |
| Rime, Valentin         | PhD Student in Earth Sciences                                                                      |                                                                                    | Switzerland                                                   |
| Rimet, Frédéric        | Dr. in aquatic ecology, expert on lake phytoplankton,<br>microalgae used for ecological monitoring | INRA                                                                               | France                                                        |
| Rinaldi, Giovanni      | Research Fellow                                                                                    | University of Exeter                                                               | United Kingdom of Great Britain<br>and Northern Ireland (the) |
| Rinaldi, Renaud        | Assistant Professor                                                                                | INSA Lyon                                                                          | France                                                        |
| Rinde, Eli             | Senior researcher                                                                                  | NIVA                                                                               | Norway                                                        |
| Rinderer, Michael      | Group Leader                                                                                       | University of Freiburg                                                             | Germany                                                       |
| Ringler, Eva           | Post doc, biology                                                                                  | University of veterinary medicine vienna                                           | Austria                                                       |
| Ringler, Max           | PostDoc, Behavioural Ecology                                                                       | University of Vienna                                                               | Austria                                                       |
| Ringot, Gabrielle      | PhD Ecology                                                                                        | IEES PARIS                                                                         | France                                                        |
| Rink, Thomas           | PhD student in particle physics                                                                    | MPIK Heidelberg                                                                    | Germany                                                       |
| Rinke, Christian       | Microbial Ecology                                                                                  | The University of Queensland                                                       | Australia                                                     |
| Rinnan, D. Scott       | Landscape Ecologist                                                                                | Yale University                                                                    | United States of America (the)                                |
| Rintala, Danielle      | Biological Safety Officer                                                                          | University of Wisconsin-Milwaukee                                                  | United States of America (the)                                |
| Riolo, Francesca       | Scientific Officer                                                                                 | European Food Safety Authority                                                     | Italy                                                         |
| Rios, Noelia           | Marine biologist research technician                                                               | MARE-ISPA                                                                          | Portugal                                                      |
| Ríos, Jerónimo         | Research Fellow in Geopolitics                                                                     | Universidad Complutense de Madrid                                                  | Spain                                                         |
| Ríos, Carlos           |                                                                                                    | Universidad de Magallanes                                                          | Chile                                                         |
| Riou, Catherine        | Lecturer in Plant Sciences                                                                         | Limoges University                                                                 | France                                                        |
| Ripoll Alves, Alan     | Teacher on Biology                                                                                 | Federal University of Paraná                                                       | Brazil                                                        |
| Ripoll Capilla, Bernat | Co-Director                                                                                        | Borneo Nature Foundation                                                           | Indonesia                                                     |
| Rippin, David          | Senior Lecturer in Physical Geography (and<br>Glaciologist)                                        | University of York                                                                 | United Kingdom of Great Britain<br>and Northern Ireland (the) |
| Ripple, Robert         | Geophysics                                                                                         | Retired                                                                            | United States of America (the)                                |
| Rique Fernandes, Mario | Anthropology                                                                                       | Fundação Oswaldo Cruz                                                              | Brazil                                                        |
| Risch, Denise          | Marine scientist                                                                                   | SAMS                                                                               | United Kingdom of Great Britain<br>and Northern Ireland (the) |
| Risco, Cristina        | Group Leader / Cell Biology of Viral Infections                                                    | Centro Nacional de Biotecnologia, CNB-CSIC                                         | Spain                                                         |
| Rising-Moore, Carl     | Professor Emeritus.... Economics                                                                   |                                                                                    | Philippines (the)                                             |
| Risio allione, Lucia   | Post doctoral research                                                                             | Nacional University of san Luis                                                    | Argentina                                                     |
| Risos, Lamprini        | Physician cardiologist                                                                             | Erasme                                                                             | Belgium                                                       |
| Ristorcelli, Isabelle  | Researcher in Astrophysics                                                                         | CNRS                                                                               | France                                                        |
| Rita, Juan             | Professor of Botany                                                                                | Universitat de les Illes Balears                                                   | Spain                                                         |
| Ritchie, Euan          | Associate Professor in Wildlife Ecology and<br>Conservation                                        | Deakin University                                                                  | Australia                                                     |
| Ritchie, Kimberly B.   | Associate Professor                                                                                | University of South Carolina Beaufort                                              | United States of America (the)                                |
| Ritter, Fabian         | Director of Research                                                                               | M.E.E.R. e.V.                                                                      | Germany                                                       |

|                          |                                                           |                                                                      |                                                            |
|--------------------------|-----------------------------------------------------------|----------------------------------------------------------------------|------------------------------------------------------------|
| Ritter, Guido            | Professor                                                 | University of Applied Sciences - Institute for sustainable Nutrition | Germany                                                    |
| Ritter-Fiebekorn, Nils   | Dipl. Environmental Scientist Climate Protection Manager  | Leuphana University Lueneburg                                        | Germany                                                    |
| Ritz, Simon              | PhD archaeology                                           | University of Lorraine                                               | France                                                     |
| Ritz, Catherine          | Senior Scientist in glaciology                            | IGE Grenoble, CNRS / Univ Grenoble Alpes                             | France                                                     |
| Riul, Pablo              | Lecturer                                                  | Universidade Federal da Paraiba                                      | Brazil                                                     |
| Rius, Marc               | Senior Researcher                                         | Centre for Advanced Studies of Blanes                                | Spain                                                      |
| Riva, Riccardo           | Associate Professor, Sea level change                     | Delft University of Technology                                       | Netherlands (the)                                          |
| Riva, Clemence           | Biology                                                   | INRA                                                                 | France                                                     |
| Rivarola, Maria          | Ecologist                                                 | University of Tennessee                                              | United States of America (the)                             |
| Rivas, Marga             | Assistant professor                                       | University of Almeria                                                | Spain                                                      |
| Rivas, Luis              | Software Engineer                                         | CENTIMX                                                              | Mexico                                                     |
| Rivera, Vania            | PhD student                                               | University of Groningen                                              | Netherlands (the)                                          |
| Rivera, Norma            | Botanist                                                  | University of Vienna                                                 | Austria                                                    |
| Rivera, Luis Osvaldo     | Researcher Conservation Biologist                         | Instituto de Ecorregiones Andinas CONICET/UNJu                       | Argentina                                                  |
| Rivera, Luis             | Researcher in Conservation Biology                        | CONICET                                                              | Argentina                                                  |
| RIVERA-CORREA, MAURICIO  | Professor/Herpetology                                     | UNIVERSIDAD DE ANTIOQUIA                                             | Colombia                                                   |
| Rivera-Ferre, Marta G.   | Chair Agroecology and Food Systems                        | University of Vic-Central University of Catalonia                    | Spain                                                      |
| Rivera-Lavado, Alejandro | Researcher/RF and antennas                                | Carlos III University of Madrid                                      | Spain                                                      |
| Rivero, Carlos           | Environmental scientist                                   |                                                                      | Spain                                                      |
| Rivero Vega, Rafael A    | Graduate Student in Paleontology                          | University of Michigan                                               | United States of America (the)                             |
| Rivers, Jerry            | Environmental Scientist                                   | North American Climate, Conservation and Environment(NACCE)          | United States of America (the)                             |
| Rivers, William          | Associate Professor of Science                            | SUNY Canton                                                          | United States of America (the)                             |
| Rivington, Mike          | Scientist                                                 | The James Hutton Institute                                           | United Kingdom of Great Britain and Northern Ireland (the) |
| Rivoirard, Sophie        | Dr Researcher Materials Science                           | CNRS                                                                 | France                                                     |
| Rivot, Etienne           | Associate Professor, Fisheries, Ecology                   | Agrocampsu Ouest                                                     | France                                                     |
| Rizzato, Pedro           | Postdoc in Sciences: Comparative Biology                  | FFCLRP-University of São Paulo                                       | Brazil                                                     |
| Rizzo, Lucia             | Researcher                                                | Stazione Zoologica Anton Dohrn, Naples                               | Italy                                                      |
| RIZZO, LUCIANA           | Professor/ Environmental Sciences                         | Federal University of Sao Paulo                                      | Brazil                                                     |
| Rizzuto, Simone          | PhD candidate Environmental Sciences                      | Lancaster University                                                 | United Kingdom of Great Britain and Northern Ireland (the) |
| Roast, Michael           | PhD Candidate - Ecology                                   | Monash University                                                    | United Kingdom of Great Britain and Northern Ireland (the) |
| roberston, loretta       | Associate Researcher, Marine Biology                      | Marine Biological Laboratory                                         | United States of America (the)                             |
| Roberson, Leslie         | PhD Candidate, School of Earth and Environmental Sciences | University of Queensland                                             | Australia                                                  |
| Robert, Julien           | Physicist                                                 | Institut Néel CNRS                                                   | France                                                     |
| Robert, Mélanie          | PhD student in biology                                    |                                                                      | France                                                     |

|                                     |                                                                                |                                                                                                                           |                                                            |
|-------------------------------------|--------------------------------------------------------------------------------|---------------------------------------------------------------------------------------------------------------------------|------------------------------------------------------------|
| Robert, Alexandre                   | Planetary Health Student Ambassador                                            | London School of Hygiene and Tropical Medicine                                                                            | United Kingdom of Great Britain and Northern Ireland (the) |
| ROBERT, Charly                      | Researcher                                                                     | University of Liege                                                                                                       | Belgium                                                    |
| Roberto, Danovaro                   | Prof.                                                                          | Polytechnic University of Marche                                                                                          | Italy                                                      |
| Roberts, Alexander J.               | Postdoctoral Research Fellow - Meteorology                                     | Institute of Climate and Atmospheric Science (ICAS) & National Centre for Atmospheric Science (NCAS), University of Leeds | United Kingdom of Great Britain and Northern Ireland (the) |
| Roberts, Callum                     | Professor of Marine Conservation                                               | University of York                                                                                                        | United Kingdom of Great Britain and Northern Ireland (the) |
| Roberts, Christine                  | Mycology                                                                       |                                                                                                                           | United States of America (the)                             |
| Robertshaw, Gary                    | Director                                                                       | Scio Learning & Research                                                                                                  | United Kingdom of Great Britain and Northern Ireland (the) |
| Robertson, Craig                    | Lecturer in Marine Biology                                                     | Bangor University                                                                                                         | United Kingdom of Great Britain and Northern Ireland (the) |
| Robertson, Iain                     | Dr                                                                             | Swansea University                                                                                                        | United Kingdom of Great Britain and Northern Ireland (the) |
| Robertson, Mel                      | Professor of Biology                                                           | Queen's University at Kingston                                                                                            | Canada                                                     |
| Robertson, Yarrow                   | Director of Indonesia Programmes / Conservation of primates and their habitats | Orangutan Foundation                                                                                                      | United Kingdom of Great Britain and Northern Ireland (the) |
| Robertson, Lynette                  | Honorary Research Fellow (Environmental Scientist)                             | University of Edinburgh                                                                                                   | United Kingdom of Great Britain and Northern Ireland (the) |
| Robertson, Bruce                    | Professor in Conservation Genetics and Wildlife Management                     | University of Otago                                                                                                       | New Zealand                                                |
| Robidoux, Marilyne                  | Research associate in biology                                                  |                                                                                                                           | Canada                                                     |
| Robillard, Tony                     | Associate proessor in Evolutionary biology                                     | Muséum national d'Histoire naturelle, Paris                                                                               | France                                                     |
| robin, jean patrice                 | DR CNRS biology/ecophysiology                                                  | cnrs                                                                                                                      | France                                                     |
| Robin, Geneviève                    | PhD                                                                            | École Polytechnique                                                                                                       | France                                                     |
| ROBIN, Christophe                   | Directeur de Recherche INRA/Agronomy - Plant Science                           | INRA                                                                                                                      | France                                                     |
| Robin Carneiro de Rezende, Michelle | MSc in Ecology student                                                         | Instituto Nacional de Pesquisas da Amazônia                                                                               | Brazil                                                     |
| Robinne, François-Nicolas           | Postdoctoral fellow                                                            | University of Alberta                                                                                                     | Canada                                                     |
| Robins, Robert                      | Senior Biologist                                                               | University of Florida, Florida Museum of Natural History                                                                  | United States of America (the)                             |
| Robins, Anthony                     | Professor of Computer Science                                                  | University of Otago                                                                                                       | New Zealand                                                |
| Robinson, Natasha                   | Research Fellow (ecology)                                                      | The Australian National University                                                                                        | Australia                                                  |
| Robinson, David                     | Hospital Scientist (Retired)                                                   | Dept of Microbiology and Infectious Diseases, Liverpool                                                                   | Australia                                                  |
| Robinson, Simon                     |                                                                                | Swansea University                                                                                                        | United Kingdom of Great Britain and Northern Ireland (the) |
| Robinson, Wendy                     | Professor Medical Genetics                                                     | University of British Columbia                                                                                            | Canada                                                     |
| Robinson, Alexander                 | Assistant professor of climate science                                         | Complutense University of Madrid                                                                                          | Spain                                                      |



|                                |                                                                                                           |                                                                                          |                                                            |
|--------------------------------|-----------------------------------------------------------------------------------------------------------|------------------------------------------------------------------------------------------|------------------------------------------------------------|
| Robinson, Joshua               | Post-doc in statistical physics                                                                           | University of Bristol                                                                    | United Kingdom of Great Britain and Northern Ireland (the) |
| Robinson-Rechavi, Marc         | Professor - Bioinformatics                                                                                | University of Lausanne                                                                   | Switzerland                                                |
| Robledo-Arnuncio, Juan J.      | Forest Geneticist                                                                                         | INIA-CIFOR                                                                               | Spain                                                      |
| Robles, Rafael                 | Climate Change Director                                                                                   | Secretaría de Ecología y Medio Ambiente, Gobierno del estado de Quintana Roo             | Mexico                                                     |
| Robroek, Bjorn                 | Lecturer in Ecology                                                                                       | University of Southampton                                                                | United Kingdom of Great Britain and Northern Ireland (the) |
| Robson, T Matthew              | Plant Scientist, UNEP EEAP (Environmental Effects Assessment Panel) on Climate Change and Ozone Depletion | University of Helsinki                                                                   | Finland                                                    |
| robson-williams, melissa       | Environmental Scientist and transdisciplinary researcher                                                  | Manaaki Whenua                                                                           | New Zealand                                                |
| Robson-Williams, Roger         | General Manager of Science - Sustainable Production                                                       | New Zealand Institute of Plant and Food Research Ltd                                     | New Zealand                                                |
| Roca, Jordi                    | prof.                                                                                                     | Universitat de Lleida                                                                    | Spain                                                      |
| Roces, Flavio                  | Professor of Zoology, behavioral sciences                                                                 | Biocenter, University of Würzburg                                                        | Germany                                                    |
| Roces-Diaz, Jose V             | Postdoctoral researcher                                                                                   | Swansea University                                                                       | United Kingdom of Great Britain and Northern Ireland (the) |
| Rocha, Iolanda                 | PosDoc                                                                                                    | CIBIO                                                                                    | Portugal                                                   |
| Rocha, Inês                    | PhD student Biosciences                                                                                   | University of Coimbra                                                                    | Portugal                                                   |
| Rocha, Afonso                  |                                                                                                           | Universidade Aveiro                                                                      | Portugal                                                   |
| Rocha, Carlos Frederico Duarte | Full Professor                                                                                            | Universidade do Estado do Rio de Janeiro                                                 | Brazil                                                     |
| Rocha, Fernanda                | Ichthyologist                                                                                             | PUCRS                                                                                    | Brazil                                                     |
| Rocha, Alfredo                 | Professor                                                                                                 | University of Aveiro                                                                     | Portugal                                                   |
| Roche, Bernadette              | Ecologist                                                                                                 | Loyola University Maryland                                                               | United States of America (the)                             |
| ROCHE, Nicolas                 | Professor (full), Chemical Engineering                                                                    | Aix-Marseille University                                                                 | France                                                     |
| Rocheleau, Ghislain            | Statistical genomics                                                                                      | Icahn School of Medicine at Mount Sinai                                                  | United States of America (the)                             |
| Rocío, López-Orozco            | PhD Student                                                                                               | University of Cordoba                                                                    | Spain                                                      |
| Röck, Martin                   | Research Fellow, Environmental Modelling of the Built Environment                                         | KU Leuven, Belgium                                                                       | Austria                                                    |
| Rodda, Gordon                  | Emeritus Zoologist                                                                                        | US Geological Survey                                                                     | United States of America (the)                             |
| Roddy, Adam                    | Postdoctoral Fellow, Plant physiology and evolution                                                       | School of Forestry and Environmental Studies, Yale University                            | United States of America (the)                             |
| Rodel, Lasco                   | Senior Scientist/Executive Director                                                                       | ICRAF/OML Center                                                                         | Philippines (the)                                          |
| Rödel, Mark-Oliver             | Researcher in Ecology and Conservation Biology                                                            | Museum für Naturkunde - Leibniz Institute for Evolution and Biodiversity Science, Berlin | Germany                                                    |
| Rodenhause, Nicholas           | Professor of Biological Sciences, Emeritus                                                                | Wellesley College                                                                        | United States of America (the)                             |
| Roder, Stefanie                | Biologist                                                                                                 |                                                                                          | Switzerland                                                |
| Röder, Juliane                 | Ecology                                                                                                   | Philipps-University Marburg                                                              | Germany                                                    |
| Röder, Johannes                | Research Associate in Renewable Energy Systems                                                            | Department Resilient Energy Systems, University of Bremen                                | Germany                                                    |
| Rodgers, Ku'ulei               | Marine Researcher                                                                                         | University of Hawaii, Hawaii Institute of Marine Biology                                 | United States of America (the)                             |

|                                       |                                                   |                                                            |                                    |
|---------------------------------------|---------------------------------------------------|------------------------------------------------------------|------------------------------------|
| Rodrigo, Maria                        | Associate professor of Ecology                    | University of Valencia                                     | Spain                              |
| Rodrigue, Sebastien                   | Professor, Biology                                | Université de Sherbrooke                                   | Canada                             |
| Rodrigues, Clara                      | Assistant Researcher                              | CESAM, Universidade de Aveiro                              | Portugal                           |
| Rodrigues, Elizabeth                  | Msc. Zoology/PCI of CNPq-DC                       | Instituto de Desenvolvimento Sustentável Mamirauá (IDSM)   | Brazil                             |
| Rodrigues, Ricardo R                  | Titular professor                                 | University of São Paulo                                    | Brazil                             |
| Rodrigues, Alice Cristina             | PHD student                                       | Universidade Federal de Viçosa                             | Brazil                             |
| Rodrigues, Kameron                    | Immunology PhD Student                            | Stanford University                                        | United States of America (the)     |
| Rodrigues, Alice                      | PhD candidate                                     | Universidade Federal de Viçosa                             | Brazil                             |
| Rodrigues, Patricia                   | PhD Scholar                                       | Leuphana University                                        | Germany                            |
| RODRIGUES, DOMINGOS                   | Associate professor/ Ecology and Natural Resource | Federal University of Mato Grosso                          | Brazil                             |
| Rodriguez, Slendy                     | PhD student                                       | University of Tartu                                        | Colombia                           |
| Rodriguez, Javier                     | Professor, School of Life Sciences                | University of Nevada, Las Vegas                            | United States of America (the)     |
| Rodriguez, Carolina                   | PhD student                                       | Swedish University of Agricultural Science                 | Sweden                             |
| Rodriguez, Cristina                   | Biology                                           | UNAM                                                       | Mexico                             |
| Rodriguez, Nicolas                    | PhD candidate                                     | Luxembourg Institute of Science and Technology             | Luxembourg                         |
| Rodriguez, Alicia                     | Research technician                               | CSIC                                                       | Spain                              |
| Rodriguez, Dolores                    | Plant Biology                                     | University of Salamanca                                    | Spain                              |
| Rodriguez, Enrique                    | Ph.D. Student                                     | University of Michigan - Ann Arbor                         | United States of America (the)     |
| Rodriguez, Ana                        | Professor                                         | NYU School of Medicine                                     | United States of America (the)     |
| Rodriguez, Juan J.                    | Professor of Chemical Engineering                 | University Autonoma of Madrid                              | Spain                              |
| Rodriguez, Dayron                     | Zootecnista- Educador ambiental                   | institución educativa santiago apostol                     | Colombia                           |
| RODRIGUEZ, DENI                       | Titular Professor, Phycology (Biology)            | Universidad Nacional Autónoma de México                    | Mexico                             |
| Rodríguez, Teresa                     | Zoologist                                         | Universidade de Santiago de Compostela                     | Spain                              |
| Rodríguez, Alejandro                  | Researcher                                        | EBD - CSIC                                                 | Spain                              |
| Rodríguez, Alexandra                  | Postdoctoral fellow                               | Centre for Functional Ecology, University of Coimbra       | Spain                              |
| Rodríguez, Sara M                     | Professor / Ecologist                             | Universidad Católica de la Santísima Concepción            | Chile                              |
| Rodríguez Álvarez, Matheus            | PhD student in Physics                            | Martin-Luther-Universität Halle-Wittenberg                 | Germany                            |
| Rodriguez Carvajal, Alan              | Postdoctoral Researcher, Biochemistry             | Zentrum für Molekulare Biologie der Universität Heidelberg | Germany                            |
| Rodriguez Frade, Jose Miguel          |                                                   | CSIC                                                       | Spain                              |
| Rodríguez García, Encarna             | Researcher Collaborator/ Forest Ecology           | Universidad de Valladolid                                  | Spain                              |
| Rodriguez Olarte, Douglas             | Professor Titular                                 | Universidad Centroccidental Lisandro Alvarado              | Venezuela (Bolivarian Republic of) |
| Rodríguez Rodríguez, Juanita Carolina | Biologist                                         | Universtié du Québec en Abitibi-Témiscamingue              | Canada                             |
| Rodríguez Uña, Asun                   | PhD student                                       | Basque Centre for Climate Change - BC3                     | Spain                              |
| Rodriguez Venturelli, Caterina        | Molecular Biology                                 | Cinvestav                                                  | Mexico                             |
| Rodriguez Vives, Clara                | PhD student                                       | University of Tasmania                                     | Australia                          |
| Rodríguez y Silva, Francisco          | Professor of Forest Fires Sciences and Management | Universidad de Córdoba                                     | Spain                              |
| Rodríguez-Estival, Jaime              | Environmental Scientist/Ecotoxicologist           | University of Castilla-La Mancha                           | Spain                              |

|                                        |                                                                                                  |                                                                               |                                                            |
|----------------------------------------|--------------------------------------------------------------------------------------------------|-------------------------------------------------------------------------------|------------------------------------------------------------|
| Rodríguez-Figueroa, Griselda Margarita | Geochemistry                                                                                     | Centro Interdisciplinario de Ciencias Marinas, Instituto Politécnico Nacional | Mexico                                                     |
| Rodríguez-Gómez, Carlos F.             | PhD/Marine ecology                                                                               | Instituto de Ecología, A.C.                                                   | Mexico                                                     |
| Rodríguez-Lazaro, Julio                | Professor of Paleontology                                                                        | University of the Basque Country UPV/EHU                                      | Spain                                                      |
| Rodríguez-Martínez, Rosa               | Academic                                                                                         | Universidad Nacional Autónoma de México                                       | Mexico                                                     |
| Rodríguez-Merino, Argantonio           | Plant Biology and Ecology                                                                        | University of Seville                                                         | Spain                                                      |
| Rodríguez-Muñoz, Rolando               | Biology research (evolution and behaviour)                                                       | University of Exeter                                                          | United Kingdom of Great Britain and Northern Ireland (the) |
| Rodriguez-Puebla, Aldo                 | Research associate/astronomy                                                                     | IA-UNAM                                                                       | Mexico                                                     |
| Rodriguez-R, Luis Miguel               | Research Engineer                                                                                | Georgia Institute of Technology                                               | United States of America (the)                             |
| Rodríguez-Rodríguez, Eduardo José      | PhD student. Honorary assistant.                                                                 | University of Seville                                                         | Spain                                                      |
| Rodriguez-Ros, Pablo                   | PhD student, Fulbright Fellow                                                                    | Scripps Institution of Oceanography - University of California San Diego      | United States of America (the)                             |
| Rodríguez-Santiago, Amparo             | Researcher in Parasitology of Aquatic Organisms                                                  | Conacyt-Universidad Autónoma del Carmen                                       | Mexico                                                     |
| Roe, Frank                             | retired                                                                                          | Center for Biofilm Engineering, Montana State University                      | United States of America (the)                             |
| Roebert, Sebastian                     | Juniorprofessor                                                                                  | University of Leipzig/Saxon Academy of Sciences                               | Germany                                                    |
| Roedl, Thomas                          | lecturer / wildlife biology                                                                      | Technical University of Munich (TUM)                                          | Germany                                                    |
| Roeleke, Manuel                        | Ecologist                                                                                        | University of Potsdam                                                         | Germany                                                    |
| Roellig, Kathleen                      |                                                                                                  | Leibniz Institute for Zoo and Wildlife Research                               | Germany                                                    |
| Roemer, Charlotte                      | Ecology                                                                                          | Muséum National d'Histoire Naturelle                                          | France                                                     |
| Roemer, Gary                           | Professor of Wildlife Ecology                                                                    | New Mexico State University                                                   | United States of America (the)                             |
| Roemhild, Roderch                      | Postdoctoral Researcher, Medical Biochemistry and Microbiology                                   | Uppsala University                                                            | Sweden                                                     |
| Roessiger, Joerg                       | Forest Economics                                                                                 | National Forest Center - Forest Research Institute Zvolen                     | Slovakia                                                   |
| Roessingh, Peter                       | Assistent Professor, Evolutionary Biology                                                        | Institute for Biodiversity and Ecosystem Dynamics, University of Amsterdam    | Netherlands (the)                                          |
| Roethig, Till                          | Postdoctoral Researcher                                                                          | University of Derby                                                           | United Kingdom of Great Britain and Northern Ireland (the) |
| Roffman, Itai                          | PhD in Evolutionary Anthropology, lecturer & researcher at the dept. of Sociology & Anthropology | The Max Stern Yezreel Valley College, Israel                                  | Israel                                                     |
| Rogalsky, Tim                          | Associate Professor of Mathematics                                                               | Canadian Mennonite University                                                 | Canada                                                     |
| Rogan, Andrew                          | Science Manager                                                                                  | Ocean Alliance                                                                | United States of America (the)                             |
| Rogaway, Phillip                       | Professor, Dept. of Computer Science                                                             | University of California, Davis                                               | United States of America (the)                             |
| ROGER, FRANCOIS                        | HEAD RESEARCH UNIT, EPIDEMIOLOGY                                                                 | CIRAD                                                                         | France                                                     |
| Röger, Marc                            | Senior Scientist                                                                                 | DLR e.V. - German Aerospace Center                                            | Germany                                                    |
| Rogers, Kerrylee                       | Associate Professor in coastal and estuarine science                                             | University of Wollongong                                                      | Australia                                                  |
| Rogers, Garry                          | President, PhD in Biogeography                                                                   | Agua Fria Open Space Alliance, Inc.                                           | United States of America (the)                             |
| Rogers, Brendan                        | Scientist                                                                                        | Woods Hole Research Center                                                    | United States of America (the)                             |
| Rogers, Amy                            | Conservation Ecology                                                                             | UCLA Center for Tropical Research                                             | United States of America (the)                             |
| Roget, Elena                           | Associate Professor / Environmental Physics                                                      | Universitat de Girona, Catalonia                                              | Spain                                                      |

|                              |                                                     |                                                                                          |                                                            |
|------------------------------|-----------------------------------------------------|------------------------------------------------------------------------------------------|------------------------------------------------------------|
| Rogic, Anita                 | Senior Research Associate                           | Icahn School of Medicine at Mount Sinai                                                  | United States of America (the)                             |
| Rogissart, Lucile            | PhD candidate in Economics                          | INRA                                                                                     | France                                                     |
| Rogner Ramos, Renato         | Associated researcher / Ecology                     | UNICAMP                                                                                  | Brazil                                                     |
| Rogora, Michela              | Researcher - Freshwater                             | CNR Water Research Institute                                                             | Italy                                                      |
| Rogowski, Johanna            | Scientific Associate                                | University of Vechta                                                                     | Germany                                                    |
| Rogozinska, Ewelina          | Research Fellow in Evidence Synthesis               | UCL                                                                                      | United Kingdom of Great Britain and Northern Ireland (the) |
| Rohde, Klaus                 | Professor emeritus Zoology                          | University of New England                                                                | Australia                                                  |
| Rohlf, Marko                 | Professor, Ecology                                  | University of Bremen                                                                     | Germany                                                    |
| Rohloff, Roland              | PhD-Student in Atmospheric Sciences                 | Max Planck Institute for Chemistry                                                       | Germany                                                    |
| Rohr, Christian              | Full Professor of Environmental and Climate History | Institute of History and Oeschger Centre for Climate Change Research, University of Bern | Switzerland                                                |
| Rohrer, Jana                 | Bachelor in Physics                                 | University of Zurich                                                                     | Switzerland                                                |
| Rohs, Susanne                | Atmospheric Research                                | Research Center Juelich GmbH                                                             | Germany                                                    |
| Rohwer, Dr. Klaus            | Senior Scientist Research & Development / Physics   |                                                                                          | Germany                                                    |
| Roig, Anna                   | Research Professor/Materials Science                | ICMAB-CSIC                                                                               | Spain                                                      |
| Roig-Gómez, Sonia            | Professor of Silviculture                           | Universidad Politécnica de Madrid                                                        | Spain                                                      |
| Roiz, David                  | Researcher                                          | Institut de Recherche pour le Développement                                              | France                                                     |
| Rojas, Bibiana               | Academy of Finland Research Fellow                  | University of Jyväskylä                                                                  | Finland                                                    |
| Rojas Nossa, Sandra V.       | Researcher in Ecology                               | University of Vigo                                                                       | Spain                                                      |
| Rojas-Runjaic, Fernando J.M. | Researcher, Herpetology                             | Museo de Historia Natural La Salle, Fundación La Salle de Ciencias Naturales             | Venezuela (Bolivarian Republic of)                         |
| Rojas-Silva, Patricio        | Professor                                           | Universidad San Francisco de Quito                                                       | Ecuador                                                    |
| Rokem, Stefan                | Biotechnologist                                     | The Hebrew University of Jerusalem                                                       | Israel                                                     |
| Roland, Marilyn              |                                                     | University of Antwerp                                                                    | Belgium                                                    |
| Roland, David                | Psychology                                          | University of Sydney                                                                     | Australia                                                  |
| Rolandi, Ranieri             | Professor, Applied Physics, retired                 | University of Genoa                                                                      | Italy                                                      |
| Rolf, Christian              | Scientist                                           | Research Center Jülich                                                                   | Germany                                                    |
| Rolfe, Kevin                 | Chartered Chemical Engineer and Chartered Scientist | Institution of Chemical Engineers                                                        | New Zealand                                                |
| Rolff, Jens                  | Professor of Evolutionary Biology                   | Freie Universitaet Berlin                                                                | Germany                                                    |
| Roll, Uri                    | Senior Lecturer                                     | Ben Gurion University of the Negev                                                       | Israel                                                     |
| Rolland, Loïc                | Researcher                                          | CNRS/LAPP                                                                                | France                                                     |
| Rolland, Filip               | Professor Molecular Plant Biology                   | KU Leuven - Leuven University                                                            | Belgium                                                    |
| Rollins, Randi               | Research Assistant PhD student                      | University of Hawaii at Manoa                                                            | United States of America (the)                             |
| ROLLO, Fernanda              | Full Professor                                      | NOVA University of Lisbon - Centre for Functional Ecology                                | Portugal                                                   |
| Rolls, Robert                | Research Fellow in Ecology                          | University of New England                                                                | Australia                                                  |
| Rolo, Victor                 | Postdoctoral Fellow                                 | University of Extremadura                                                                | Spain                                                      |
| Rolvering, Catherine         | R&D specialist / Life Sciences                      | University of Luxembourg                                                                 | Luxembourg                                                 |
| Romagnoli, Beatrice          | Marine biology and Natural science                  | Alma Mater Studiorum, University of Bologna                                              | Italy                                                      |
| Romagnoliq, Federica         | Post Doc research                                   | EURAC Research                                                                           | Italy                                                      |

|                          |                                                               |                                                                 |                                                            |
|--------------------------|---------------------------------------------------------------|-----------------------------------------------------------------|------------------------------------------------------------|
| Romagnuolo, Taea         | Conservation                                                  | University of Kent                                              | United Kingdom of Great Britain and Northern Ireland (the) |
| Romanczuk, Pawel         | Senior Researcher, Theoretical Biology and Biophysics         | Humboldt Universität zu Berlin                                  | Germany                                                    |
| Romanini, Rebeca         | PhD student, Botany                                           | UNICAMP                                                         | Brazil                                                     |
| Romano, Pedro S. R.      | Professor Associado                                           | Universidade Federal de Viçosa                                  | Brazil                                                     |
| Romanowska, Elzbieta     | professor                                                     | University of Warsaw                                            | Poland                                                     |
| Romeo, Yves              | Lecturer in Genetics                                          | University of Toulouse                                          | France                                                     |
| Romeo, Daina             | PhD student in Environmental science                          | ETH Zurich                                                      | Switzerland                                                |
| Romeralo, Carmen         | Postdoctoral Researcher on Forest Pathology                   | Swedish University of Agricultural Sciences                     | Sweden                                                     |
| Romero, Jose Maria       | Phd. Behavioral ecology                                       | CSIC                                                            | Spain                                                      |
| Romero, Camila           | Medical student                                               |                                                                 | Dominican Republic (the)                                   |
| Romero, Víctor           | Mammalogist                                                   | Universidad Simón Bolívar                                       | Venezuela (Bolivarian Republic of)                         |
| Romero, David            | Professor in Molecular Genetics                               | Ctr. Of Genomic Sciences, Natl. Autonomous University of Mexico | Mexico                                                     |
| Romero, Gustavo          | Associate Professor, Ecologist                                | University of Campinas (UNICAMP)                                | Brazil                                                     |
| Romero García, Pablo     | Biotechnology                                                 | Universidad de Valencia                                         | Spain                                                      |
| Romero Noguera, Pablo    | PhD Dr Social Anthropology                                    | University of Barcelona                                         | Spain                                                      |
| Romero-Centeno, Rosario  | Research Scientist                                            | UNAM                                                            | Mexico                                                     |
| Romero-Ortiz, Catalina   | PhD (c). Biology                                              | Universidad Nacional de Colombia                                | Colombia                                                   |
| Rommevaux, Céline        | Researcher / Geomicrobiology                                  | CNRS-UMR7294 MIO Marseille                                      | France                                                     |
| Roncero-Ramos, Beatriz   | Soil restoration, biocrusts, cyanobacteria                    | University of Almería                                           | Spain                                                      |
| Ronchail, Josyane        | Teacher and researcher                                        | Paris-Diderot University                                        | France                                                     |
| Ronga, Domenico          | Researcher as Agronomist                                      | University of Modena and Reggio Emilia                          | Italy                                                      |
| Rönnelid, Mats           | Professor in Energy Technology                                | Dalarna UNiversity                                              | Sweden                                                     |
| Ronse, Anne              | Plant conservation biology                                    | Meise Botanic Garden                                            | Belgium                                                    |
| Rood, Richard            | Professor, Climate and Space Sciences and Engineering (CLaSP) | University of Michigan                                          | United States of America (the)                             |
| Rooney-Varga, Juliette   | Climate change and sustainability                             | UMass Lowell Climate Change Initiative                          | United States of America (the)                             |
| Roos, Ruben Erik         | Postdoctoral researcher, Ecology                              | Norwegian University of Life Sciences                           | Norway                                                     |
| Roosens, Veerle          | Teacher                                                       | St-Jozefscollege                                                | Belgium                                                    |
| Root, Terry L            | Senior Fellow, Emerita                                        | Stanford University                                             | United States of America (the)                             |
| Root-Bernstein, Meredith | Conservation ecologist                                        | Instituto de Ecología y Biodiversidad                           | Chile                                                      |
| Roper, Andrea            | Biologist, Human Therapeutic Product Evaluator                | Health Canada, Federal Government                               | Canada                                                     |
| Roper, Erika             | PhD researcher, Urban Ecology                                 | The University of Western Australia                             | Australia                                                  |
| ROPERT-COUDERT, Yan      | Permanent researcher                                          | CNRS-CEBC UMR7372                                               | France                                                     |
| Roque, Fabio             | Professor/Ecology and Conservation Conservation               | UFMS                                                            | Brazil                                                     |
| Roques, Francoise        | astronome                                                     | Observatoire de Paris                                           | France                                                     |
| Roques, Sébastien        | PhD Student, Ecology                                          | Université Paul Sabatier Toulouse 3                             | France                                                     |
| Rosa, Clarissa           | Researcher                                                    | Instituto Nacional de Pesquisas da Amazônia (INPA)              | Brazil                                                     |
| Rosa, Gonçalo M.         |                                                               | Institute of Zoology, Zoological Society of London              | United Kingdom of Great Britain and Northern Ireland (the) |

|                             |                                                               |                                                                                           |                                                            |
|-----------------------------|---------------------------------------------------------------|-------------------------------------------------------------------------------------------|------------------------------------------------------------|
| Rosa, Augusto               | PhD student                                                   | Universidade Estadual de Campinas                                                         | Brazil                                                     |
| Rosa Cota, Vinícius         | Associate Professor / Neuroengineering                        | Federal University of São João Del-Rei                                                    | Brazil                                                     |
| Rosa Varella, Henrique      | Post doctoral scientist                                       | Universidade Estadual Paulista                                                            | Brazil                                                     |
| Rose, Kenneth               | Professor                                                     | University of Maryland Center for Environmental Science                                   | United States of America (the)                             |
| Rosell, Julieta             |                                                               | Universidad Nacional Autónoma de México                                                   | Mexico                                                     |
| Roselló, Juan               | Biochemistry                                                  |                                                                                           | Dominican Republic (the)                                   |
| Rosemond, Amy               | Professor of Ecology                                          | University of Georgia                                                                     | United States of America (the)                             |
| Rosen, Rudolph              | Professor and Director Inst. Water Resources Science and Tech | Texas A&M University in San Antonio                                                       | United States of America (the)                             |
| Rosenbaum, Peter A          | Professor of Biological Sciences                              | State University of New York @ Oswego                                                     | United States of America (the)                             |
| Rosenblatt, Adam            | Assistant Professor, Biology                                  | University of North Florida                                                               | United States of America (the)                             |
| Rosenburgh, Angus           | Assistant Professor, Biosciences                              | Durham University                                                                         | United Kingdom of Great Britain and Northern Ireland (the) |
| Rosenfeld, Viktor           | Research Assistant                                            | Technische Universität Berlin                                                             | Germany                                                    |
| Rosenfield, Gabriel         |                                                               | UC Berkeley                                                                               | United States of America (the)                             |
| Rosengrave, Patrice         | Research fellow                                               | Otago University                                                                          | New Zealand                                                |
| Rosenow, Patrick            | Editor-in-Chief                                               | German Review on the United Nations / United Nations Association of Germany (UNA Germany) | Germany                                                    |
| Rosenthal, Michael          | Graduate Student in Conservation Biology                      | State University of New York                                                              | United States of America (the)                             |
| ROSENTHAL, GIL GUASTONI     | Professor of Biology                                          | University of Padua                                                                       | Italy                                                      |
| Rosier, Anne Sophie         | veterinary                                                    |                                                                                           | Congo (the)                                                |
| Rosnell, Harrison           | Environmental scientist                                       | Griffith University                                                                       | Australia                                                  |
| Rosner, Sabine              | Assoc. Professor                                              | University of Natural Resources and Life Sciences, Vienna                                 | Austria                                                    |
| Ross, Samuel                | PhD: Global change and ecological stability                   | Trinity College Dublin                                                                    | Ireland                                                    |
| Rossi, Natacha              | Post doc in ethology                                          |                                                                                           | France                                                     |
| Rossi, Sergio               | Associate Professor                                           | University of Salento                                                                     | Italy                                                      |
| Rossi, María Susana         | Evolutionary Genetics                                         | Investigator of CONICET                                                                   | Argentina                                                  |
| Rossi, Sergio               | Full Professor of Economics                                   | University of Fribourg                                                                    | Switzerland                                                |
| ROSSI, Vincent              | Research Scientist in Ocean Sciences                          | MIO-CNRS                                                                                  | France                                                     |
| Rossi Caruzo, Maria Beatriz | Adjunct Professor / Botany                                    | Universidade Federal de São Paulo (Unifesp)                                               | Brazil                                                     |
| Rossi Nakayama, Cristina    | Assistant professor                                           | Federal University of Sao Paulo                                                           | Brazil                                                     |
| Rossigalli, Nathalia        | PhD Student                                                   | University of São Paulo                                                                   | Brazil                                                     |
| Rossignol, Benoit           | Tenured assistant professor on history                        | Université Paris 1 Panthéon-Sorbonne                                                      | France                                                     |
| Rosswall, Thomas            | Professor emeritus                                            |                                                                                           | Sweden                                                     |
| Rost, Nicolas               | PhD student                                                   | Max Planck Institute of Psychiatry, Munich                                                | Germany                                                    |
| Rostan, Julie               | PhD student in Marine Social Sciences                         | University of the Highlands and Islands                                                   | United Kingdom of Great Britain and Northern Ireland (the) |
| Rostański, Adam             | DSc. PhD                                                      | Uniwersytet Śląski                                                                        | Poland                                                     |
| ROTA, THIBAUT               | Researcher in Ecology                                         | CNRS                                                                                      | France                                                     |
| Roth, Nicolas               | Environmental Physics                                         | IUP Heidelberg                                                                            | Germany                                                    |

|                       |                                                         |                                                                                                           |                                                            |
|-----------------------|---------------------------------------------------------|-----------------------------------------------------------------------------------------------------------|------------------------------------------------------------|
| Roth, Aurora          | Geophysics                                              | University of Alaska Fairbanks                                                                            | United States of America (the)                             |
| Roth, Markus          | Senior scientist / Astroparticle physics                | Karlsruhe Institute of Technology                                                                         | Germany                                                    |
| Rothgang, Heinz       | Professor of Health Economics                           | University of Bremen                                                                                      | Germany                                                    |
| Rothgang, Michael     | PhD student, Mathematics                                | Humboldt-Universität zu Berlin                                                                            | Germany                                                    |
| Rothlauf, Franz       | Full Professor of Information Systems                   | University of Mainz                                                                                       | Germany                                                    |
| Rothman, Andrea       | Biology                                                 |                                                                                                           | United States of America (the)                             |
| Rotmann, Sea          | Operating Agent                                         | IEA DSM Technology Collaboration Programme                                                                | New Zealand                                                |
| Rotschi, Julie        | PhD student in paleolimnology and ecology               | INRA                                                                                                      | France                                                     |
| rotter, shlomo        | CEO                                                     | Smart Diamond Technologies Lda                                                                            | Israel                                                     |
| ROTURIER, jacques     | Physicist                                               | Independent researcher (retired from Bordeaux University)                                                 | France                                                     |
| Rouby, Etienne        | PhD Student                                             | La Rochelle Université                                                                                    | France                                                     |
| Rouch, Laly           | PhD Student                                             | INRA                                                                                                      | France                                                     |
| Rouco, Carlos         | Assitant Professor in Ecology                           | Ecology area of the University or Córdoba                                                                 | Spain                                                      |
| Roucoux, Katherine    | Senior Lecturer, physical geography                     | University of St Andrews                                                                                  | United Kingdom of Great Britain and Northern Ireland (the) |
| Rougemont, Quentin    | Postdoctoral researcher                                 | Université Laval                                                                                          | Canada                                                     |
| Rougeux, Clément      | Postdoctoral Researcher                                 | University of Calgary                                                                                     | Canada                                                     |
| Rouhan, Germinal      | Assistant Professor / Plant Systematics and Evolution   | Museum national d'Histoire naturelle                                                                      | France                                                     |
| Roukema, Boudewijn    | professor, cosmology                                    | Toruń Centre for Astronomy, Faculty of Physics, Astronomy and Informatics, Nicolaus Copernicus University | Poland                                                     |
| Roulé, Thomas         | Phd student, Molecular Biology                          | Institute of Plant Sciences Saclay                                                                        | France                                                     |
| Roulet, Mélanie       | PhD Student                                             | Laboratoire d'Astrophysique de Marseille (LAM)                                                            | France                                                     |
| Round, Christopher    | Senior Climate Change Specialist                        | Booz Allen Hamilton                                                                                       | United States of America (the)                             |
| Roura Grabulosa, Pere | Professor in Materials Science                          | Universitat de Girona                                                                                     | Spain                                                      |
| Rousi, Heta           | Philosophy Doctor/Marine biology                        | Åbo Akademi University                                                                                    | Finland                                                    |
| rousseau, marine      | PhD student                                             | Chrono-environment laboratory (Besançon)                                                                  | France                                                     |
| Rousseau, Guillaume   | Professor                                               | Maranhão State University                                                                                 | Brazil                                                     |
| Rousseau, Elsa        | Postdoc in mathematical modeling of infectious diseases |                                                                                                           | France                                                     |
| Rousselle, Marjolaine | Post-doctoral fellow in genetic and genomics            | Bioinformatics Research Center, Aarhus University                                                         | Denmark                                                    |
| Rousset, Francois     | Senior scientist, Evolutionary Biology                  | CNRS                                                                                                      | France                                                     |
| Rout, Tracy           | Senior Research Fellow, Conservation Science            | University of Queensland                                                                                  | Australia                                                  |
| Routledge, Paul       | Professor in Geography                                  | University of Leeds                                                                                       | United Kingdom of Great Britain and Northern Ireland (the) |
| Roux, Natacha         | PhD in Marine Biology                                   | Observatoire Océanologique de Banyuls sur mer BIOM UMR7232                                                | France                                                     |
| Roux, Camille         | CR                                                      | CNRS - Univ. Lille                                                                                        | France                                                     |
| Roux, Nicolas         | PhD candidate, Land use and social ecology              | University of Natureal resources and life sciences, Vienna                                                | Austria                                                    |
| ROUX, David           | Assistant professor / Plant Biology                     | Avignon university                                                                                        | France                                                     |

|                         |                                                                        |                                                                                                     |                                                            |
|-------------------------|------------------------------------------------------------------------|-----------------------------------------------------------------------------------------------------|------------------------------------------------------------|
| ROUX, Philippe          | Research in Life Cycle Assessment (LCA)                                | Irstea                                                                                              | France                                                     |
| ROUX, Olivier           | Researcher / ecology                                                   | IRD                                                                                                 | France                                                     |
| Rouyer, Marie-Morgane   | MSc student / Applied Ecology                                          | University of East Anglia                                                                           | France                                                     |
| Rouys, Sophie           | Dr Zoology                                                             | Swansea University                                                                                  | United Kingdom of Great Britain and Northern Ireland (the) |
| Rovelli, Giacomo        | PhD Student                                                            | University of Perugia                                                                               | Italy                                                      |
| Rovero, Francesco       | Assistant Professor in Ecology                                         | University of Florence                                                                              | Italy                                                      |
| Roveta, Camilla         | PhD student in Environmental and Civil Protection                      | Polytechnic University of Marche                                                                    | Italy                                                      |
| Rovira, Pere            | Researcher / Soil Science                                              | Forest Sciences Centre of Catalonia (CTFC)                                                          | Spain                                                      |
| Rowe, Randall           | Plant Pathologist                                                      | Ohio State University                                                                               | United States of America (the)                             |
| Rowe, Noel              | Director                                                               | Primate Conservation Inc. Co Editor of All the Worlds' Primates                                     | United States of America (the)                             |
| Rowland, Mary           | Research wildlife biologist                                            | PNW Research Station, USDA Forest Service                                                           | United States of America (the)                             |
| Rowland, Lucy           | Senior lecturer in physical geography                                  | University of Exeter                                                                                | United Kingdom of Great Britain and Northern Ireland (the) |
| Roy, Rajshri            | Senior Lecturer, Nutrition & Dietetics                                 | University of Auckland                                                                              | New Zealand                                                |
| Roy, Lise               | assistant professor in Ecology                                         | Université Paul-Valéry Montpellier 3 - Centre d'Ecologie Fonctionnelle et Evolutive (UMR 5175 CEFE) | France                                                     |
| ROY, Mélanie            | Assistant professor in ecology                                         | Université Paul Sabatier                                                                            | France                                                     |
| Roy Chaudhuri, Nairita  | PhD Researcher (Climate change law and autonomous adaptation in India) | Tilburg University                                                                                  | Netherlands (the)                                          |
| Royer, Mark             | PhD Candidate / Marine Biology                                         | Hawaii Institute of Marine Biology                                                                  | United States of America (the)                             |
| Royer, Colin            | PhD in Oceanography                                                    | Université Libre de Bruxelles                                                                       | Belgium                                                    |
| Royle, Nick             | Senior Lecturer in Behavioural Ecology                                 | University of Exeter                                                                                | United Kingdom of Great Britain and Northern Ireland (the) |
| Royo-Esnal, Aritz       | Professor                                                              | Universitat de Lleida                                                                               | Spain                                                      |
| Rozen-Rechels, David    | Behavioral Ecologist                                                   | Institut d'Écologie et des Sciences de l'Environnement de Paris                                     | France                                                     |
| Rozenberg, Philippe     | Research director, forest scientist                                    | INRA                                                                                                | France                                                     |
| Rozgonjuk, Dmitri       | Junior Research Fellow                                                 | University of Tartu                                                                                 | Estonia                                                    |
| Rozsa, Lajos            | senior researcher                                                      | Hungarian Academy of Sciences                                                                       | Hungary                                                    |
| Rua, Alex               | Adjunct Professor, Oceanography                                        | University of Antioquia                                                                             | Colombia                                                   |
| Ruano, Irene            | Postdoc in forestry                                                    | Instituto Universitario de investigación gestión forestal sostenible -universidad de Valladolid     | Spain                                                      |
| Ruano, Francisca        | Professor of Zoology/Entomology/Biogeography/Agroecology               | University of Granada                                                                               | Spain                                                      |
| Ruault, Jean-François   | Researcher                                                             |                                                                                                     | France                                                     |
| Ruaux, Geoffrey         | PhD Animal Behaviour                                                   |                                                                                                     | France                                                     |
| Rubalcava-Gracia, Diana | Postdoctoral Researcher                                                | Karolinska Institute                                                                                | Sweden                                                     |
| Rubbens, Peter          | PhD Student                                                            | Ghent University                                                                                    | Belgium                                                    |
| Rüber, Lukas            | Curator Ichthyology                                                    | Naturhistorisches museum Bern                                                                       | Switzerland                                                |
| Rubido, Nicolás         | Adjunct Professor                                                      | Universidad de la República                                                                         | Uruguay                                                    |



|                         |                                                                       |                                                                         |                                                            |
|-------------------------|-----------------------------------------------------------------------|-------------------------------------------------------------------------|------------------------------------------------------------|
| Rubinat-Ripoll, Laura   | PhD student in Microbial Ecology                                      | Station Biologique de Roscoff (CNRS - Sorbonne Université)              | Spain                                                      |
| Rubinoff, Daniel        | Professor                                                             | University of Hawaii                                                    | United States of America (the)                             |
| Rubio, José Luis        | Soil Scientist                                                        | Deputy President World Association o Soil and Water Conservation-WASWAC | Spain                                                      |
| Rubio, Ignacio          | Biochemist, head of sepsis & infection reserach                       | University Hospital Jena                                                | Germany                                                    |
| Rubolini, Diego         | Associate Professor of Ecology                                        | Dipartimento di Scienze e Politiche Ambientali, Università di Milano    | Italy                                                      |
| Rücker, Gerta           | Senior Researcher and Guest Scientist                                 | University of Freiburg                                                  | Germany                                                    |
| Rücklin, Martin         | Senior researcher Palaeobiology                                       | Naturalis Biodiversity Center                                           | Netherlands (the)                                          |
| Rudd, Jennifer A.       | Research Officer, Chemistry                                           | Swansea University                                                      | United Kingdom of Great Britain and Northern Ireland (the) |
| Rudelt, Lucas           | Doctoral student in computational neuroscience                        | MPI Dynamics and Self-Organization                                      | Germany                                                    |
| Rüdiger, Marc           | Scientist/Teacher                                                     | College                                                                 | Germany                                                    |
| Rudolph, Barbara        | Scientist, Phylogeography and Evolution of Plants                     | Universität Hamburg                                                     | Germany                                                    |
| Rudolph, Terence        | PhD Astro-Geophysics                                                  |                                                                         | United States of America (the)                             |
| Rué, Mathieu            | Geoarchaeologist / PhD student                                        | Paléotime / UMR5140 Montpellier                                         | France                                                     |
| Rueda Sevilla, Juan     | Researcher/Biodiversity                                               | University of Valencia                                                  | Spain                                                      |
| Ruedas, Luis            | Professor of Biology                                                  | Portland State University                                               | United States of America (the)                             |
| Ruedas, Thomas          | Postdoctoral research associate                                       | Museum für Naturkunde Berlin                                            | Germany                                                    |
| RUEDAS, REMI            | Study Engineer                                                        | CNRS (Centre National de la Recherche Scientifique)                     | France                                                     |
| Ruedenauer, Fabian A.   | Nutritional Ecology                                                   | Zoology III, Biocenter, University of Würzburg                          | Germany                                                    |
| Ruess, Anja K           | Research Associate / Doctoral Student, Science and Technology Studies | Technical University of Munich                                          | Germany                                                    |
| Ruff, Martin            | Physics                                                               | Universität Ulm (PhD)                                                   | Germany                                                    |
| Ruffini, Giulio         | CSO                                                                   | Starlab                                                                 | Spain                                                      |
| Rüffler, Claus          | Associate Professor/Biology                                           | Uppsala University                                                      | Sweden                                                     |
| Rufin, Philippe         | Researcher in Remote Sensing                                          | Humboldt-Universität zu Berlin                                          | Germany                                                    |
| Rugg, Kyle              | Senior Scientist                                                      | Boehringer Ingelheim Pharmaceuticals, Inc.                              | United States of America (the)                             |
| Ruggeri, Nancy          | Director of Research Mentor and Mentee Education                      | University of Wisconsin-Madison                                         | United States of America (the)                             |
| Rugh, John              | Professor & Director, Evidence-Based Practice Program                 | Univ of Texas Health Science San Antonio TX                             | United States of America (the)                             |
| Rughani, Deepak         | Co-director                                                           | Biofuelwatch                                                            | United Kingdom of Great Britain and Northern Ireland (the) |
| Ruhl, Nathan            | Lecturer                                                              | Rowan University                                                        | United States of America (the)                             |
| Ruhl, Tatjana           | Political Science                                                     | FU Berlin                                                               | Germany                                                    |
| Ruhland, Christopher T. | Professor of Biological Sciences                                      | Minnesota State University, Mankato                                     | United States of America (the)                             |
| Ruimy, Anne             | PhD in Ecology                                                        | EDP Sciences                                                            | France                                                     |
| Ruitton, Sandrine       | Full professor                                                        | Aix-Marseille University                                                | France                                                     |
| Ruiz, Mateo             | Assistant Conservation & Science Officer                              | Barn Owl Trust                                                          | United Kingdom of Great Britain and Northern Ireland (the) |
| Ruiz, Jose Luis         | PhD Student                                                           | IPBLN-CSIC                                                              | Spain                                                      |

|                                |                                                        |                                                             |                                                            |
|--------------------------------|--------------------------------------------------------|-------------------------------------------------------------|------------------------------------------------------------|
| Ruiz, Lidia                    | Astronomy/Physics                                      |                                                             | United States of America (the)                             |
| Ruiz, Philippe                 | Ingenier                                               | INRA                                                        | France                                                     |
| Ruiz, Ana                      | Researcher in Marine Environmental Science             | IMEDEA (UIB-CSIC)                                           | Spain                                                      |
| Ruiz, Lucas                    | Researcher                                             | IANIGLA CONICET                                             | Argentina                                                  |
| Ruiz, Daniel                   | Affiliate Researcher in Peace Studies                  | SSSUP                                                       | Italy                                                      |
| RUIZ, PEDRO PAREDES            | ENVIRONMENT TECHNICAL                                  | PUBLIC ADMINISTRATION                                       | Spain                                                      |
| Ruiz Pino, Diana               | Research Scientist Oceanographer Climatologiste        | Sorbonne Université                                         | France                                                     |
| Ruiz Buendía, Gustavo          | PhD student in Genomic Sciences                        | Center for Integrative Genomics                             | Switzerland                                                |
| Ruiz De Gamboa, Margarita      | PhD, Biologist                                         | Arturo Prat University                                      | Chile                                                      |
| Ruiz Lopez, Maria Jose         | Postdoctoral Researcher in Molecular Ecology           | Consejo Superior de Investigaciones Cientificas             | Spain                                                      |
| Ruiz Lopez, Daniel             | Affiliate Researcher in Peace Studies                  | Scuola Superiore Sant'Anna di Pisa                          | Italy                                                      |
| Ruiz Peyré, Fernando           | Geographer                                             | University of Innsbruck                                     | Austria                                                    |
| Ruiz Ramos, Marga              | Professor of Crop Ecology                              | Universidad Politécnica de Madrid                           | Spain                                                      |
| Ruiz Suárez, Luis Gerardo      | Tenure Scientist/ Atmospheric Chemistry                | Universidad Nacional Autónoma de México                     | Mexico                                                     |
| RUIZ-FONS, FRANCISCO           | WILDLIFE DISEASE EPIDEMIOLOGIST                        | Spanish National Research Council                           | Spain                                                      |
| Ruiz-Frau, Ana                 | Postdoctoral Fellow                                    | Consejo Superior de Investigaciones Cientificas             | Spain                                                      |
| Ruiz-Mirazo, Kepa              | Full time researcher                                   | University of the Basque Country                            | Spain                                                      |
| Ruiz-Navarro, Ana              |                                                        | Universidad de Murcia                                       | Spain                                                      |
| Rulik, Björn                   | Taxonomic Coordination GBOL / Dipterist                | Zoologisches Forschungsmuseum A. Koenig                     | Germany                                                    |
| Rullán Silva, Cristóbal Daniel | Research professor/Remote Sensig and GIS of Vegetation | DACBiol, Universidad Juárez Autónoma de Tabasco             | Mexico                                                     |
| Rullière, Pauline              | Chemist Researcher                                     | University Paul Sabatier                                    | France                                                     |
| Rullman, Stan                  | Director of Research                                   | Earthwatch Institute                                        | United States of America (the)                             |
| Rumeu, Beatriz                 | Postdoc fellow, Ecology                                | Universidad de Oviedo                                       | Spain                                                      |
| Rumpel Teixeira, Lauren        | Doutorando                                             | Universidade de Brasília                                    | Brazil                                                     |
| Rumpf, Sabine                  | Postdoc                                                | University of Vienna                                        | Austria                                                    |
| Runge, Anne Kathrine           | PhD student in Archaeology and Molecular Biology       | University of York                                          | United Kingdom of Great Britain and Northern Ireland (the) |
| Ruokolainen, Kalle             | Plant ecologist                                        | University of Turku                                         | Finland                                                    |
| Ruoss, Engelbert               | Lecturer                                               | University of Southern Switzerland                          | Switzerland                                                |
| Rupke, David                   | Associate Professor of Physics                         | Rhodes College                                              | United States of America (the)                             |
| Rupp, Sebastian                | Post Doc Biology                                       | Heidelberg University                                       | Germany                                                    |
| Ruppert, Jan Christian         | Assistant Professor in Plant Ecology                   | Institute of Evolution and Ecology, University of Tuebingen | Germany                                                    |
| Ruppert, Nadine                | Primatologist                                          | Universiti Sains Malaysia                                   | Malaysia                                                   |
| Ruprecht, Eszter               | associate professor                                    | Babes-Bolyai University Cluj                                | Romania                                                    |
| Rurali, Riccardo               |                                                        | Institut de Ciència de Materials de Barcelona (ICMAB-CSIC)  | Spain                                                      |
| Rusch, Verónica                | Researcher, Forest Ecology                             | INTA                                                        | Argentina                                                  |
| Ruscher, Paul                  | Earth & Environmental Sciences                         | Florida State University (retired)                          | United States of America (the)                             |
| Rusconi, Filippo               | Researcher                                             | Centre national de la recherche scientifique (CNRS, France) | France                                                     |

|                          |                                                                      |                                                                                                             |                                                            |
|--------------------------|----------------------------------------------------------------------|-------------------------------------------------------------------------------------------------------------|------------------------------------------------------------|
| Rushforth, Sam           | Dean of Science Emeritus                                             | Utah Valley University                                                                                      | United States of America (the)                             |
| Rushworth, Ian           | Ecologist and Scientific Manager                                     | Ezemvelo KwaZulu-Natal Wildlife                                                                             | South Africa                                               |
| Russak, Zeev             | CTO                                                                  | Diagnostics.Ai                                                                                              | United Kingdom of Great Britain and Northern Ireland (the) |
| Russell, Tracey          | Conservation biologist                                               |                                                                                                             | Australia                                                  |
| Russell, Andy            | Professor in Animal Behaviour                                        | University of Exeter                                                                                        | United Kingdom of Great Britain and Northern Ireland (the) |
| Russell, Debbie          | Senior Research Fellow                                               | University of St Andrews                                                                                    | United Kingdom of Great Britain and Northern Ireland (the) |
| Russell, Roly            | Ecology and society                                                  | Sandhill Institute / Columbia University (most recent)                                                      | Canada                                                     |
| Russell, Greg            | Profess of Chemistry, and President of the Polymer Division of IUPAC | University of Canterbury                                                                                    | New Zealand                                                |
| Russell-Buckland, Joshua | Research Assistant in Medical Physics and Biomedical Engineering     | University College London                                                                                   | United Kingdom of Great Britain and Northern Ireland (the) |
| Russo, Arturo            | Full professor (retired) of History of Physics                       | University of Palermo (Italy)                                                                               | Italy                                                      |
| Rustenbach, Christian    | Senior Cardiac Surgeon / PhD                                         | University of Colone                                                                                        | Germany                                                    |
| Rustin, Pierre           | Research Director CE Cnrs                                            | Cnrs/Inserm                                                                                                 | France                                                     |
| Rusu, Alina Simona       | Associate Professor/ Animal Psychology                               | Babes-Bolyai University                                                                                     | Romania                                                    |
| Rüter, Sebastian         | Senior Scientist                                                     | Thünen Institute of Wood Research at the Federal Research Institute for Rural Areas, Forestry and Fisheries | Germany                                                    |
| Rutger, Wilschut         | PostDoc                                                              | University of Konstanz                                                                                      | Germany                                                    |
| Ruth, Nicolas            | Postdoctoral researcher in Psychology                                | Goldsmiths, University of London                                                                            | United Kingdom of Great Britain and Northern Ireland (the) |
| Rutschmann, Benjamin     | PhD Student                                                          | University of Würzburg                                                                                      | Germany                                                    |
| Ruskanen, Taina          | Director of Bachelor in Physical Sciences                            | University of Helsinki                                                                                      | Finland                                                    |
| RUY, Stephane            | Scientist in soil physics, agronomy, hydrology                       | INRA                                                                                                        | France                                                     |
| Ruzickova, Natalia       | PhD student                                                          | Institute of Science and Technology Austria                                                                 | Austria                                                    |
| Ryan, Greer              | Renewable Energy Research                                            | Center for Biological Diversity                                                                             | United States of America (the)                             |
| Ryan, Ken                | Associate Professor of Antarctic Biology                             | Victoria University of Wellington                                                                           | New Zealand                                                |
| Ryan, Kathleen           | Associate Professor                                                  | University of California, Berkeley                                                                          | United States of America (the)                             |
| Ryan, Peter G.           | Director, FitzPatrick Insititute of African Ornithology              | University of Cape Town                                                                                     | South Africa                                               |
| Ryan, Patrick (Paddy)    | Professor                                                            | Colorado School of Mines and Metropolitan State University of Denver                                        | United States of America (the)                             |
| Ryan, Sadie              | Associate Professor, Medical Geography                               | University of Florida                                                                                       | United States of America (the)                             |
| Rybak, Ivan              | Junior Researcher , cosmology                                        | Institute of Astrophysics and Space Sciences (IA), Porto                                                    | Portugal                                                   |
| Rybizki, Jan             | Postdoc Astronomy                                                    | Max Planck Institute for Astronomy                                                                          | Germany                                                    |
| Rybka, Harald            | Climate Scientist                                                    | German Weather Service                                                                                      | Germany                                                    |
| Rybníček, Michal         | Assoc. Prof., researcher, dendrochronologist                         | Mendel University in Brno & Global Change Research Institute Czech Academy of Sciences                      | Czech Republic (the)                                       |
| Rybski, Paul             | Professor Emeritus, Physics                                          | University of Wisconsin-Whitewater                                                                          | United States of America (the)                             |
| Rychlak, Yvonne          | Biodiversity and Nature Protection                                   |                                                                                                             | Germany                                                    |

|                              |                                                             |                                                                                                  |                                |
|------------------------------|-------------------------------------------------------------|--------------------------------------------------------------------------------------------------|--------------------------------|
| Ryerson, William             | President                                                   | Population Media Center                                                                          | United States of America (the) |
| Ryffel, Gerhart              | Professor of Cell Biology                                   | Institut für Zellbiologie                                                                        | Germany                        |
| Rykaczewski, Shawn           | Tropical Marine Biology                                     | University of Essex                                                                              | United States of America (the) |
| Rykowski, Kazimierz          | Professor forest ecology                                    | Forest Research Institute                                                                        | Poland                         |
| Ryszawska, Bożena            | Profesor/ Economics                                         | Wroclaw University of Economics                                                                  | Poland                         |
| Rzedowski, Martha            | Mathematics                                                 | Cinvestav                                                                                        | Mexico                         |
| S, Santosh                   | Graduate Student                                            | JNCASR                                                                                           | India                          |
| S, Faizi                     | Ecologist                                                   | Independent consultant as Biodiversity Expert to Japan International Cooperation Agency and UNDP | India                          |
| S. de Souza, Rafael          | Researcher, Astrophysics                                    | University of North Carolina at Chapel Hill                                                      | United States of America (the) |
| S. Hofmann, Gabriel          | Researcher/Climate                                          | Universidade La Salle, Canoas                                                                    | Brazil                         |
| Sá, Rui M.                   | Integrated Researcher                                       | University of Lisbon                                                                             | Portugal                       |
| Saada, Georges               | Physics                                                     | Retired                                                                                          | France                         |
| Saalmann, Franziska          | Marine Biology                                              | University of Groningen                                                                          | Netherlands (the)              |
| Saathoff, Elmar              | Research Scientist, Epidemiology                            | Ludwig-Maximilians-Universitaet, München (LMU)                                                   | Germany                        |
| Sabaté, Santi                | Prof. of Ecology                                            | University of Barcelona and CREAF                                                                | Spain                          |
| Sabatino, Stephen            | Evolutionary Biologist/Bioinformatician                     | University of Porto                                                                              | Portugal                       |
| Sabbadini, Roger             | Emeritus Professor of Biology                               | San Diego State University                                                                       | United States of America (the) |
| Sabbagh, Audrey              | Associate Professor                                         | Université de Paris                                                                              | France                         |
| Sabbi, Kris                  |                                                             | University of New Mexico                                                                         | United States of America (the) |
| Sabel, Maike                 | PhD Student, Limnology                                      | University of Konstanz                                                                           | Germany                        |
| Sabine Adeline, Fanta Yadang | Researcher                                                  | Institute of Medical Research and Medicinal Plants Studies                                       | Cameroon                       |
| Sabogal, Nelson              | Master of Science in Meteorology                            | Former, Scientist Ozone Secretariat, UNEP                                                        | Colombia                       |
| Saccoccio, Muriel            | Engineer + Ph D/ Space observation/Physics                  | Cnes (French Space Agency)                                                                       | France                         |
| Saccol, Suelen               | PhD Candidate                                               | Universidade Federal de Santa Maria (UFSM)                                                       | Brazil                         |
| Sach, Michael                | Pre-Service-Teacher-Trainer, physicist                      | Studienseminar für Gymnasien Bad Vilbel                                                          | Germany                        |
| Sachdeva, Himani             | postdoc                                                     | IST Austria                                                                                      | Austria                        |
| Sache, Ivan                  | Professor of Plant Pathology and Epidemiology               | AgroParisTech                                                                                    | France                         |
| Sackett, Penny D             | PhD Physics, Honorary Professor at Climate Change Institute | Australian National University                                                                   | Australia                      |
| Sacks, Laura                 | Hydrologist (retired)                                       | U.S. Geological Survey                                                                           | Canada                         |
| Saclier, Nathanaëlle         |                                                             | Université Claude-Bernard lyon1                                                                  | France                         |
| Sadai, Shaina                | PhD Candidate, Climate Systems Research                     | UMass Amherst                                                                                    | United States of America (the) |
| Saddique, Qaisar             | Postdoctoral Researcher                                     | Potsdam Institute for Climate Impact Research (PIK)                                              | Germany                        |
| Sadedin, Suzanne             | Evolutionary biologist                                      |                                                                                                  | United States of America (the) |
| Saebelfeld, Manja            | Postdoc, Evolutionary Biology                               |                                                                                                  | Germany                        |
| Saeed, Uzma                  | PhD Research Scholar                                        | University of Massachusetts                                                                      | United States of America (the) |
| Sáenz-Romero, Cuauhtémoc     | Researcher                                                  | Universidad Michoacana de San Nicolás de Hidalgo                                                 | Mexico                         |
| Safari, Ignas                | Conservation Biologist                                      | University of Dodoma                                                                             | Tanzania, United Republic of   |
| Safdar Abbas Khan, Muhammad  | Agro forestry                                               | Self employed                                                                                    | Pakistan                       |

|                               |                                                       |                                                                 |                                                            |
|-------------------------------|-------------------------------------------------------|-----------------------------------------------------------------|------------------------------------------------------------|
| Safdari, Pezhman              | Researcher                                            | University of Helsinki                                          | Finland                                                    |
| Safer, Anton                  | Senior Scientist                                      | Heidelberg University                                           | Germany                                                    |
| Sage, Samuel H.               | Senior Scientist                                      | Atlantic States Legal Foundation, Inc.                          | United States of America (the)                             |
| Sagouis, Alban                | Ecology                                               | iDlv                                                            | Germany                                                    |
| Sagristà, Sònia               | Research Support Office Coordinator, Marine Research  | Institute of Marine Sciences (ICM-CSIC)                         | Spain                                                      |
| saha, amartya                 | Ecohydrologist/Instrumentation                        | Archbold Biological Station                                     | United States of America (the)                             |
| Saha, Haymanti                | PhD Student                                           | NIOO                                                            | Netherlands (the)                                          |
| Saharan, Ketul                | Junior Research Fellow                                | Institute of Life Sciences Bhubaneshvar                         | India                                                      |
| Sahonero Canavesi, Diana X.   | Postdoctoral researcher                               | NIOZ                                                            | Netherlands (the)                                          |
| Sahoo, Gobardhan              | Postdoctoral researcher                               | University of Haifa                                             | Israel                                                     |
| Sahu, Abhipsa                 | PhD student - Biological Sciences                     | Xi'an Jiaotong-Liverpool University                             | China                                                      |
| Saigo, Miguel                 | PhD Biology                                           |                                                                 | Argentina                                                  |
| Saini, Romesh                 | Clinical Scientist                                    | Multicare Health System                                         | United States of America (the)                             |
| Sainsbury, Nigel              | Geography                                             | University of Exeter                                            | United Kingdom of Great Britain and Northern Ireland (the) |
| Sainsbury, Anthony            | Senior Lecturer                                       | Institute of Zoology                                            | United Kingdom of Great Britain and Northern Ireland (the) |
| Saint-Amand, Antoine          | PhD Student in bioscience engineering                 | UCLouvain                                                       | Belgium                                                    |
| Saint-Charles, Johanne        | Professor                                             | Université du Québec à Montréal                                 | Canada                                                     |
| Saito, Carlos Hiroo           | Vice-Director of the Institute of Biological Sciences | University of Brasilia                                          | Brazil                                                     |
| Sakdapolrak, Patrick          | Professor / Geography                                 | University of Vienna                                            | Austria                                                    |
| Saksa, Kristin                | Graduate Researcher in ichthyology                    | Moss Landing Marine Labs                                        | United States of America (the)                             |
| Sala, Iria                    | PhD student                                           | University of Cádiz                                             | Spain                                                      |
| Salado, Isabel                | PhD candidate                                         | Spanish Research Council CSIC                                   | Spain                                                      |
| Salafsky, Susan               | Ecologist                                             | 500 Women Scientists                                            | United States of America (the)                             |
| Šalamon, Dragica              | assistant professor                                   | University of Zagreb Faculty of Agriculture                     | Croatia                                                    |
| Salari, Seppe                 | Entomologist                                          | corporate                                                       | Netherlands (the)                                          |
| Salas Reyes, Raul             | PhD candidate                                         | University of Toronto Scarborough                               | Canada                                                     |
| Salas-Vidal, Enrique          | Professor/Developmental Biology                       | UNAM                                                            | Mexico                                                     |
| Salat, Jordi                  | Oceanographer                                         | Institut de Ciències del Mar (CSIC)                             | Spain                                                      |
| Salazar, Noel B.              | Professor of Anthropology                             | KU Leuven                                                       | Belgium                                                    |
| Salazar-Mendías, Carlos       | Tenured Professor (Botany)                            | University of Jaén                                              | Spain                                                      |
| Salcido Guevara, Luis Antonio | Research Professor                                    | Autonomous University of Sinaloa                                | Mexico                                                     |
| Saldanha Bueno, Anderson      | Lecturer in Biology and Ecology                       | Instituto Federal de Educação, Ciência e Tecnologia Farroupilha | Brazil                                                     |
| Saldanha-Correa, Flavia       | Biologist                                             | São Paulo University                                            | Brazil                                                     |
| Sale, Peter F                 | Distinguished University Professor (Emeritus)         | University of Windsor                                           | Canada                                                     |
| Salemi, Taddei                | Neurobiology                                          | EMBL Rome                                                       | Italy                                                      |
| Salerno, Franco               | researcher                                            | IRSA-CNR                                                        | Italy                                                      |
| Salerno, Carlo                | Biologist                                             | Italian National Researches Council - Water Research Institute  | Italy                                                      |

|                             |                                                           |                                                                      |                                                            |
|-----------------------------|-----------------------------------------------------------|----------------------------------------------------------------------|------------------------------------------------------------|
| Salesa, David               | PhD Student                                               | CEAM Foundation                                                      | Spain                                                      |
| Salgado, Paula              | Senior Lecturer                                           | Newcastle University                                                 | United Kingdom of Great Britain and Northern Ireland (the) |
| Salgado, Moises             | Msc. on Remote Sensing                                    | National Institute for Space Research                                | Brazil                                                     |
| Salgueiro, Pedro            | Manager in Science and Technology (Fellowship)            | University of Évora                                                  | Portugal                                                   |
| Saliendra, Nicanor          | Ecologist                                                 | USDA ARS                                                             | United States of America (the)                             |
| Salinas, María J.           | University professor                                      | University of Almería                                                | Spain                                                      |
| Salinger, Jim               | Professor                                                 | University of Florence                                               | Italy                                                      |
| Salino, Alexandre           | Full Professor/ Botany                                    | Universidade Federal de Minas Gerais                                 | Brazil                                                     |
| Salisbury, Brian            | Retired scientist                                         |                                                                      | United States of America (the)                             |
| Salles, Luis                | PhD Candidate / Ecology                                   | Universidade Estadual de Campinas                                    | Brazil                                                     |
| Salliou, Nicolas            | Postdoc                                                   | ETH Zürich                                                           | Switzerland                                                |
| Salmon, Yann                | University researcher                                     | University of Helsinki                                               | Finland                                                    |
| Salmon, Tristan             | Economist                                                 |                                                                      | Belgium                                                    |
| Salmon, Loic                | Researcher, Biophysics                                    | CNRS                                                                 | France                                                     |
| Salmon-Monviola, Jordy      | PhD, Engineer                                             | INRAE                                                                | France                                                     |
| Salmon-Mulanovich, Gabriela | Public Health                                             |                                                                      | Peru                                                       |
| Salmona, Jordi              | Research associate, Evolution                             | CNRS/ IRD/ University of Toulouse                                    | France                                                     |
| Salo, Matti                 | Research Scientist                                        | Natural Resources Institute Finland                                  | Finland                                                    |
| Salomidi, Maria             | Researcher                                                | Hellenic Centre for Marine Research                                  | Greece                                                     |
| Saloña-Bordas, Marta        | Full Time Lecturer, Forensic Entomologist                 | University of the Basque Country                                     | Spain                                                      |
| Salpeteur, Matthieu         | Researcher, anthropologist                                | IRD                                                                  | France                                                     |
| Saltori, Cristiano          | PhD candidate                                             | University of Trento                                                 | Italy                                                      |
| Salvadó, Victoria           | Professor of Analytical Chemistry                         | Universitat de Girona <a href="http://udg.edu">udg.edu</a>           | Spain                                                      |
| Salvador, Gilberto          | PhD Student                                               | Universidade Federal do Pará                                         | Brazil                                                     |
| Salvador, Ricardo           | Director and Senior Scientist, Food & Environment Program | The Union of Concerned Scientists                                    | United States of America (the)                             |
| SALVI, DANIELE              | ASSISTANT PROFESSOR                                       | University of L'Aquila                                               | Italy                                                      |
| Salvo, Adriana              | Principal Researcher Ecology Entomology                   | CONICET                                                              | Argentina                                                  |
| Salzmann, Sebastian         |                                                           | EAWAG                                                                | Switzerland                                                |
| Salzwedel, Horst            | Marine Biologist                                          | Retired, formerly GIZ - German Society for International Cooperation | Colombia                                                   |
| Samaha, Jason               | Psychology Professor                                      | University of California, Santa Cruz                                 | United States of America (the)                             |
| Samani, Pouya               | Postdoctoral researcher                                   | Maastricht University                                                | Netherlands (the)                                          |
| Samelis, Vasileios          | Master's student                                          | Francis Crick Institute                                              | United Kingdom of Great Britain and Northern Ireland (the) |
| Samitier, Salvador          | Head of the Catalan Office for Climate Change / Chemistry | Generalitat de Catalunya                                             | Spain                                                      |
| Sampaio, Marta              | Biologist                                                 | CIBIO/InBIO University of Porto; STRIX Lda.                          | Portugal                                                   |
| Sample, James               | Research Scientist                                        | NIVA                                                                 | Norway                                                     |
| Sampou, Peter               | PhD Oceanography                                          | Sturgis charter School                                               | United States of America (the)                             |
| Samson, Roeland             | Full professor in urban and environmental ecology         | University of Antwerp                                                | Belgium                                                    |

|                                |                                             |                                                                                                    |                                                               |
|--------------------------------|---------------------------------------------|----------------------------------------------------------------------------------------------------|---------------------------------------------------------------|
| Samson, Cheyenne               |                                             | Green Heritage Fund Suriname                                                                       | Suriname                                                      |
| samuel, barreto                | phd student, biology                        | Laboratoire de Biométrie et Biologie Évolutive (LBBE)<br>—Laboratoire d'Écologie Microbienne (LEM) | France                                                        |
| Samuel, Marsha                 | PhD Candidate in Environmental Science      | University of Nottingham Malaysia Campus                                                           | Malaysia                                                      |
| Samuelsson, Karl               | PhD student, geospatial information science | University of Gävle                                                                                | Sweden                                                        |
| Samways, Michael               | Distinguished Professor                     | Stellenbosch University                                                                            | South Africa                                                  |
| Samyn, Denis                   | Glaciologist                                | ICIMOD                                                                                             | Nepal                                                         |
| San Cristobal, Magali          | Senior scientist                            | INRA                                                                                               | France                                                        |
| San Martín, Carmen             |                                             | Centro Nacional de Biotecnología (CNB-CSIC)                                                        | Spain                                                         |
| Sana, Thibault                 | Postdoctoral Researcher                     | INRAE                                                                                              | France                                                        |
| Sanaphre Villanueva, Lucía     | Restoration ecology                         | Global Change and Sustainability Centre                                                            | Mexico                                                        |
| Sanborn, Paul                  | Associate Professor, Soil Science           | University of Northern British Columbia                                                            | Canada                                                        |
| Sanches Iglesias, German Dario | Sociologist                                 | University of La Laguna                                                                            | Spain                                                         |
| Sanchez, Andres                | phD student                                 | UNAM                                                                                               | Mexico                                                        |
| Sanchez, Michele               | Plant conservation                          |                                                                                                    | United Kingdom of Great Britain<br>and Northern Ireland (the) |
| Sanchez, Pablo                 | Earth Sciences                              | Universidad Austral                                                                                | Chile                                                         |
| Sanchez, Lucile                | Postdoc fellow in Atomic Physics            | University of Otago                                                                                | New Zealand                                                   |
| Sanchez, Alfonso               | Political Ecologist                         | Loyola University                                                                                  | Spain                                                         |
| Sanchez, Angel M.              | Conservation Biology                        | University of Alcalá (UAH), Madrid, Spain                                                          | Spain                                                         |
| Sanchez, Juan Armando          | Professor, Biological Sciences              | Universidad de los Andes                                                                           | Colombia                                                      |
| Sánchez, Kevin                 | PhD student                                 | Instituto Patagónico para el Estudio de los Ecosistemas<br>Continetales (IPEEC-CONICET)            | Argentina                                                     |
| Sánchez, Carlos                | Emeritus Prof.                              | Universidad Autónoma Madrid                                                                        | Spain                                                         |
| Sánchez Barreiro, Fátima       | PhD student                                 | The Globe Institute, University of Copenhagen                                                      | Denmark                                                       |
| Sanchez Gonzalez, Jorge R.     | Researcher in Freshwater Ecosystems         | Universitat de Lleida                                                                              | Spain                                                         |
| Sánchez González, Jorge Rubén  | Researcher                                  | Sociedad Ibérica de Ictiología - Universitat de Lleida                                             | Spain                                                         |
| Sanchez Meseguer, Andrea       | Postdoc                                     | Real Jardin Botanico Madrid (CSIC)                                                                 | Spain                                                         |
| Sánchez Navarro, Sonia         | Bat research                                | Estación Biológica de Doñana                                                                       | Spain                                                         |
| SANCHEZ PEREZ, José Miguel     | Research Director                           | CNRS                                                                                               | France                                                        |
| Sanchez Vidal, Anna            | Associate Professor                         | Universitat de Barcelona                                                                           | Spain                                                         |
| Sanchez-Alonso, Sara           | Postdoctoral Associate                      | Haskins Laboratories & Yale University                                                             | United States of America (the)                                |
| Sanchez-Diaz, Alberto          | Professor Assistant                         | Universidad de Cantabria                                                                           | Spain                                                         |
| Sanchez-Donoso, Ines           | Postdoc on Evolutionary Biology             | Doñana Biological Station (Spanish National Research<br>Council)                                   | Spain                                                         |
| Sanchez-Escalante, Jose Jesus  | Herbario USON curator                       | Universidad de Sonora                                                                              | Mexico                                                        |
| Sánchez-Fernández, David       | Ecology andconservation biology             | University of Murcia                                                                               | Spain                                                         |
| Sanchez-Herranz, Antonio       | Biologist retired                           | Hospital Ramón y Cajal Madrid                                                                      | Spain                                                         |
| Sánchez-Lizaso, José Luis      | Professor Marine Biology                    | University of Alicante                                                                             | Spain                                                         |
| Sánchez-Ruiz, Manuel           | Entomologist.                               | Museo Nacional de Ciencias Naturales (MNCN-CSIC)                                                   | Spain                                                         |
| Sánchez-Sáenz, Mauricio        | Associate professor/Biologist               | National University of Colombia                                                                    | Colombia                                                      |

|                                |                                                           |                                                                                  |                                                            |
|--------------------------------|-----------------------------------------------------------|----------------------------------------------------------------------------------|------------------------------------------------------------|
| Sanchez-Salcedo, Javier        | Researcher/Astrophysics                                   | Universidad Nacional Autonoma de Mexico                                          | Mexico                                                     |
| Sanchez-Vialas, Alberto        | PhD evolutionary biology                                  | National Museum of Natural Sciences, Madrid                                      | Spain                                                      |
| SÁNCHEZ-VICENTE, INMACULADA    | Postdoc researcher                                        | University of Salamanca                                                          | Spain                                                      |
| Sanchez-Vila, Xavier           | Professor civil engineering                               | Universitat Politecnica de Catalunya                                             | Spain                                                      |
| Sandahl, Johan                 | Senior lecturer, Geography education                      | Department of humanities and social sciences education, Stockholm University     | Sweden                                                     |
| Sandberg, Marie                | Associate Professor, European Ethnology                   | University of Copenhagen                                                         | Denmark                                                    |
| Sandbrook, Richard             | Professor Emeritus of Political Science                   | University of Toronto                                                            | Canada                                                     |
| Sander, Rolf                   | atmospheric chemistry                                     | Max-Planck Institute of Chemistry                                                | Germany                                                    |
| Sanders, Ernst                 | Professor, Biochemical Engineering                        | Hamburg University of Applied Sciences                                           | Germany                                                    |
| SANDERS, Malcolm               | Postdoctoral researcher                                   | Muséum national d'Histoire naturelle                                             | France                                                     |
| Sandgren, Anna                 | Director Sevent generation                                | Unilever                                                                         | United Kingdom of Great Britain and Northern Ireland (the) |
| Sandhu, Deven                  | Executive Director                                        | Biocule Inc                                                                      | Canada                                                     |
| Sandin, Gustav                 | Researcher, PhD Chemical Environmental Science            | IVL Swedish Environmental Research Institute                                     | Sweden                                                     |
| Sandmeier, Ernst               | Energy Engineer                                           | Hochschule Luzern, TEchnik & Architektur                                         | Switzerland                                                |
| Sándor, Attila D.              | Researcher, PI                                            | University of Agricultural Sciences and Veterinary Medicine                      | Romania                                                    |
| Sandoval Gil, JOSE MIGUEL      | RESEARCHER/PROFESSOR                                      | UNIVERSITY OF BAJA CALIFORNIA                                                    | Mexico                                                     |
| Sandoval Gil, Jose Miguel      | Principal Researcher in Marine Botany                     | Universidad Autónoma de Baja California                                          | Mexico                                                     |
| Sandoval Salinas, Maria Leonor | Assistant Researcher and Professor - Biology              | National University of Tucumán - CONICET                                         | Argentina                                                  |
| Sandoval-Sierra, Jose Vladimir | Post-Doctoral Trainee                                     | University of Tennessee Health Science Center, Department of Preventive Medicine | United States of America (the)                             |
| Sandoz, Jean-Christophe        | Research Director                                         | CNRS - Evolution Genomes Behaviour and Ecology                                   | France                                                     |
| Sandri, Marcus                 | Senior Consultant - Cardiology                            | University of Leipzig - Heart Center                                             | Germany                                                    |
| Sandstrom, Claes-Goran         | Chairman                                                  | Energy company                                                                   | United Kingdom of Great Britain and Northern Ireland (the) |
| Sandu, Irina                   | Researcher - Conservation scientist                       | Munchmuseet                                                                      | Norway                                                     |
| Sanford, Robert                | Ecological Sciences                                       | Northern Arizona University                                                      | United States of America (the)                             |
| Sang, Neil                     | Researcher, Geographical Information Science              | Swedish University of Agricultural Science (SLU)                                 | Sweden                                                     |
| Sanganyado, Edmond             | Associate Professor                                       | Shantou University                                                               | China                                                      |
| SANGARE, SHEICK KHALIL         | Soil scientist                                            | CILSS                                                                            | Mali                                                       |
| Sangari, Félix J               | Microbiology assistant professor                          | University of Cantabria                                                          | Spain                                                      |
| Sanger, Jennifer               | Research Associate                                        | University of Tasmania                                                           | Australia                                                  |
| Sangster, George               | Postdoc, Systematics                                      | Naturalis Biodiversity Center                                                    | Netherlands (the)                                          |
| Sanguet, Arthur                | PhD in biodiversity conservation                          | University of Geneva                                                             | Switzerland                                                |
| Sanguinetti, Michael           | Chemistry                                                 | Jacobs University Bremen                                                         | Germany                                                    |
| Sanguinetti, Linn              | Scientific employee                                       | University of Bremen                                                             | Germany                                                    |
| Saniger, Jose M                | Material Science Professor                                | Universidad Nacional Autónoma de Mexico -UNAM                                    | Mexico                                                     |
| Sankara Narayan, Abishek       | Doctoral Researcher, Water and Sanitation for Development | Eawag - ETH Zurich                                                               | Switzerland                                                |



|                                  |                                                                     |                                                                       |                                                            |
|----------------------------------|---------------------------------------------------------------------|-----------------------------------------------------------------------|------------------------------------------------------------|
| Sanne, Moritz                    | Wood Technology                                                     | University for sustainable Developement Eberswalde                    | Germany                                                    |
| SANT ANNA, PAULO AFRANIO         | PROFESSOR ASSOCIADO                                                 | UNIV. FEDERAL DOS VALES DO JEQUITINHONHA E MUCURI                     | Brazil                                                     |
| Santabarbara, Stefano            | Researcher                                                          | National Research Council                                             | Italy                                                      |
| Santamaria, Flavia               | Lecturer & Researcher                                               |                                                                       | Australia                                                  |
| Santamaria, Marta                | Research Intern                                                     | Technical University od Catalunya - Barcelona Tech                    | Spain                                                      |
| Santamaria Gomez, Angela Marcela | Biologist                                                           | Resnatur (Colombina Network of private natural reserves - Colombia)   | Colombia                                                   |
| Santamaria Perez, Jorge          | PhD student                                                         | Universitat de Girona                                                 | Spain                                                      |
| Santana, Quentin                 | Post doctoral research fellow                                       | University of Pretoria                                                | South Africa                                               |
| Santana, William                 | Professor of Zoology                                                | Universidade do Sagrado Coração                                       | Brazil                                                     |
| Santana, Diego                   | Zoology Professor                                                   | UFMS                                                                  | Brazil                                                     |
| Santana, Flávia                  | Pos-doc researcher                                                  | Inpa                                                                  | Brazil                                                     |
| Santana Dias, Felipe             | Researcher                                                          | University of Campinas                                                | Brazil                                                     |
| Santana-Flores, Pablo            | marine science                                                      | Cinvestav-IPN                                                         | Mexico                                                     |
| Santander, Javier                | Assistant Professor                                                 | Memorial University of Newfoundland                                   | Canada                                                     |
| Santander-Neto, Jones            | Professor                                                           | Instituto Federal de Educação, Ciência e Tecnologia do Espírito Santo | Brazil                                                     |
| Santangeli, Andrea               | Post-doc researcher                                                 | University of Helsinki                                                | Finland                                                    |
| Santangelo, Marco                | Associate Professor of Geography                                    | Politecnico di Torino                                                 | Italy                                                      |
| Santarém, Frederico              | PhD Student                                                         | CIBIO/InBIO-UP                                                        | Portugal                                                   |
| Santerne, Alexandre              | Astronomer                                                          | Aix-Marseille University                                              | France                                                     |
| Santesteban, Luis Gonzaga        | Head of Agronomy, Biotechnology and Food Science Department         | Universidad Pública de Navarra                                        | Spain                                                      |
| Santi, Nicole                    | Biologist                                                           | Maddalena & associati sagl                                            | Switzerland                                                |
| Santilli, Paulo                  | Professor                                                           | São Paulo Estate University                                           | Brazil                                                     |
| Santinelli, Veronica             | Phd student in Marine Ecology                                       | University of Palermo                                                 | Italy                                                      |
| Santini, Nadia S.                | Research Fellow                                                     | Instituto de Ecología UNAM                                            | Mexico                                                     |
| Santo, Debora                    | Research Assistant in Plant genetics                                | BioSense Institute                                                    | Serbia                                                     |
| Santo, Andrea                    | Professor of Sciences                                               | Ministry of Education, University and Research                        | Italy                                                      |
| Santo, Anna                      | Institute for a Sustainable Environment, Faculty Research Assistant | University of Oregon                                                  | United States of America (the)                             |
| santos, leonor                   | mathematics                                                         |                                                                       | Portugal                                                   |
| Santos, Flavio                   | Professor of Plant Ecology                                          | UNICAMP                                                               | Brazil                                                     |
| Santos, Cinthya                  | Msc in Ecology and Biodiversity Conservation                        |                                                                       | Ecuador                                                    |
| Santos, Mário                    | Molecular Microbiology                                              | University of Lisbon                                                  | Portugal                                                   |
| Santos, Ana                      | Ressearcher                                                         | CITAB-UTAD                                                            | Portugal                                                   |
| Santos, Marcilio                 | Physics                                                             | University Of Aberdeen                                                | United Kingdom of Great Britain and Northern Ireland (the) |
| Santos, Joaquim                  |                                                                     | Centre for Functional Ecology, University of Coimbra                  | Portugal                                                   |
| Santos, Eduardo                  | Lecturer in Behavioural Ecology                                     | Universidade de São Paulo                                             | Brazil                                                     |
| Santos, Xavier                   | Researcher                                                          | CIBIO/ INBIO                                                          | Portugal                                                   |

|                           |                                                                      |                                                                                                 |                                                            |
|---------------------------|----------------------------------------------------------------------|-------------------------------------------------------------------------------------------------|------------------------------------------------------------|
| Santos, Nuno              | post-doc researcher, wildlife disease ecology                        | CIBIO-InBIO, University of Porto                                                                | Portugal                                                   |
| Santos, Marcos            | Chemical Engineer - inspector coordinator                            |                                                                                                 | Spain                                                      |
| Santos, Tiago             | professor                                                            | Universidade Federal do Pampa                                                                   | Brazil                                                     |
| Santos, Teresa            | PhD student                                                          | University of Lisbon                                                                            | Portugal                                                   |
| Santos, Filipe Duarte     | Full professor geophysics, climate change science and sustainability | University of Lisbon                                                                            | Portugal                                                   |
| Santos, Diana             | Computer Science                                                     |                                                                                                 | Norway                                                     |
| Santos, Carlos David      | Professor                                                            | Federal University of Pará                                                                      | Brazil                                                     |
| Santos, Carlos Davod      | Assistant Professor                                                  | NOVA School of Science and Technology, NOVA University of Lisbon                                | Portugal                                                   |
| Santos, Rui               | Associate Professor                                                  | University of Algarve / Center of Marine Sciences                                               | Portugal                                                   |
| Santos, Cristina          | Associate professor Biological Anthropology                          | Universitat Autònoma de Barcelona                                                               | Spain                                                      |
| Santos, Arturo            | Lecturer - Psychology of Sustainability                              | San Diego State University - Imperial Valley Campus                                             | United States of America (the)                             |
| Santos, Luís António      | Auxiliar Professor / Communication                                   | Universidade do Minho                                                                           | Portugal                                                   |
| Santos-Granero, Fernando  | Senior Scientists // Social Anthropology                             | Smithsonian Tropical Research Institute                                                         | Panama                                                     |
| Santschi, Peter           | Professor                                                            | Texas A&M University at Galveston                                                               | United States of America (the)                             |
| SANTUCCI, Pierre          | PostDoctoral Training Fellow                                         | The Francis Crick Institute                                                                     | United Kingdom of Great Britain and Northern Ireland (the) |
| Santure, Anna             | School of Biological Sciences                                        | University of Auckland                                                                          | New Zealand                                                |
| Sanuy Castells, Delfi     | Ph Doctor and Profesor                                               | Lleida universitay. Catalonia Spain.                                                            | Spain                                                      |
| Sanz, Nuria               | Dr Biologia                                                          | UdG                                                                                             | Spain                                                      |
| Sanz-Pérez, Ana           | PhD candidate                                                        | Forest Science Center of Catalonia                                                              | Spain                                                      |
| Sanz-Ros, Antonio Vicente | Researcher and technician                                            | IDEAGRO                                                                                         | Spain                                                      |
| Sapinski, JP              | Assistant professor of Environmental Studies and Public Policy       | Université de Moncton                                                                           | Canada                                                     |
| Sapir, Yuval              | Senior Lecturer and director of Botanic Garden                       | Tel Aviv University                                                                             | Israel                                                     |
| Saporito, Dafne           | PhD student                                                          | UNC                                                                                             | Argentina                                                  |
| Sarabian, Cécile          | Postdoctoral fellow in Primatology                                   | Kyoto University                                                                                | Japan                                                      |
| Sarah, Martinez           | marine biologist                                                     |                                                                                                 | France                                                     |
| Saravia, Leonardo         | Professor/Researcher Ecology                                         | Universidad Nacional de General Sarmiento                                                       | Argentina                                                  |
| Sardanyés, Josep          | Principal Investigator (Theoretical Biology)                         | Centre de Recerca Matemàtica                                                                    | Spain                                                      |
| Sargent, Isabel           | Senior Researcher (Applied AI), Chartered Scientist                  |                                                                                                 | United Kingdom of Great Britain and Northern Ireland (the) |
| Saric, Tomo               | Group Leader, Biomedicine                                            | Medical Faculty, University of Cologne                                                          | Germany                                                    |
| Sarkar, Priyanka          | Doctoral student                                                     | Department of Ecology and Environmental Science, Assam University, Silchar-788011, INDIA        | India                                                      |
| Sarmiento Afonso, Álvaro  | Integrated Researcher                                                | Centre for Functional Ecology - Science for People & the Planet   Coimbra University - Portugal | Portugal                                                   |
| Sarmiento, Carolina       | Researcher - Microbial Ecology                                       |                                                                                                 | Colombia                                                   |
| Sarmiento, Carlos Eduardo | Associate professor                                                  | Instituto de Ciencias Naturales, Universidad Nacional de Colombia                               | Colombia                                                   |

|                          |                                                         |                                                                      |                                                            |
|--------------------------|---------------------------------------------------------|----------------------------------------------------------------------|------------------------------------------------------------|
| Sarmiento, Jaime         | Researcher Freshwater Fishes / Soil macroinvertebrates  | Museo Nacional de Historia Natural, La Pas - Bolivia                 | Bolivia (Plurinational State of)                           |
| Sarmiento, Antonio       | Staff scientist                                         | Universidad Nacional Autonoma de Mexico                              | Mexico                                                     |
| Sarmiento-Galan, Antonio | Staff scientist                                         | Universidad Nacional Autonoma de Mexico                              | Mexico                                                     |
| Sarrazin, François       | Professor of Ecology                                    | Sorbonne Université                                                  | France                                                     |
| Sarret, Geraldine        | Directrice de recherche CNRS                            | CNRS, Université Grenoble Alpes                                      | France                                                     |
| Sarron, Julien           | researcher                                              | CIRAD                                                                | France                                                     |
| SARTHOU, Jean-Pierre     | Full Professor of Agronomy-Agroecology                  | University of Toulouse - Institut National Polytechnique de Toulouse | France                                                     |
| Sarvary, Joseph          | Deputy Director                                         | Fundacion Para La Tierra                                             | Paraguay                                                   |
| SARVER, DALE             | Research Biologist                                      | Kampachi Farms                                                       | United States of America (the)                             |
| SARVER, Ph.D., DALE      | Research Biologist                                      | Kampachi Farms LLC                                                   | United States of America (the)                             |
| Sasco, Annie J           | Medical cancer prevention epidemiologist                | Bordeaux University                                                  | France                                                     |
| Sasidhar, Dr. K.         | Faculty Member                                          | Acharya Nagarjuna University, Andhra Pradesh, India                  | India                                                      |
| Sass, Nelson             | Professor, Department of Obstetrics                     | UNIFESP - Universidade Federal de São Paulo                          | Brazil                                                     |
| Sassi, Paola             | Biology                                                 | CONICET                                                              | Argentina                                                  |
| sassine, jad             | Molecular biology                                       | Newcastle University                                                 | United Kingdom of Great Britain and Northern Ireland (the) |
| SATNEY, ISABELLE         | Senior Scientist in Life Sciences                       | INSERM                                                               | France                                                     |
| Sato, Chloe              | Research Fellow in Ecosystem Risk Assessment            | Deakin University                                                    | Australia                                                  |
| Satterfield, Dara        | Research Associate                                      | Smithsonian Migratory Bird Center                                    | United States of America (the)                             |
| Sattler, Tobias          | Researcher in atmospheric chemistry                     | Max Planck Institute for Chemistry                                   | Germany                                                    |
| Sattler, Thomas          | Director Monitoring Department                          | Swiss Ornithological Institute                                       | Switzerland                                                |
| Satyajith, Aashish       | Research Scholar                                        | Chennai Mathematical Institute                                       | India                                                      |
| Sauer, Ursula            | Scientist Biology                                       | Austrian Institute of Technology                                     | Austria                                                    |
| Sauerbrei, Willi         | Medical Biometry                                        | Medical Center - University of Freiburg                              | Germany                                                    |
| Saulnier, Erwan          | Marine ecology                                          | Agrocampus ouest                                                     | France                                                     |
| Saulnier-Talbot, Emilie  | Aquatic Ecology                                         | Université Laval                                                     | Canada                                                     |
| sauma, tania             | PhD Physics, Geology Department                         | Universidad Mayor                                                    | Chile                                                      |
| Saunders, James          | Lecturer, Geology                                       | University of New England                                            | Australia                                                  |
| Saunders, Alan           | Conservation biology                                    | Waikato Regional Council                                             | New Zealand                                                |
| Saunders, Timothy        | Assistant Professor / Developmental biology             | National University of Singapore                                     | Singapore                                                  |
| Saunders, Karen          | PhD Candidate, forest ecology, paleoecology             | Environmental Studies Program, Antioch University New England        | United States of America (the)                             |
| Sauter, Brittany         | PhD Student Microbiology and Biotechnology              | University of Alberta                                                | Canada                                                     |
| Sauvage, jean-francois   | Researcher astrophysics and instrumentation             | ONERA                                                                | France                                                     |
| Sauvage, Sébastien       | Researcher in Nanosciences/Physics                      | CNRS - Centre National de la Recherche Scientifique                  | France                                                     |
| Sauvage, Sabine          | Modelling in water resources and environmental sciences | CNRS                                                                 | France                                                     |
| Sauvageau, Dominic       | Professor, Chemical and Materials Engineering           | University of Alberta                                                | Canada                                                     |
| sauvagnargues, sophie    | PR. teacher researcher                                  | IMT Mines Ales                                                       | France                                                     |
| Sauvain, Michel          | Director of Research                                    | Institut de Recherche pour le Développement                          | France                                                     |

|                          |                                                                       |                                                                                             |                                                            |
|--------------------------|-----------------------------------------------------------------------|---------------------------------------------------------------------------------------------|------------------------------------------------------------|
| Sauvard, Daniel          | Entomologist                                                          | INRA                                                                                        | France                                                     |
| Sauve, Drew              | PhD Student - Ecological and Evolutionary Responses to Climate Change | Queen's University                                                                          | Canada                                                     |
| Sauvion, Nicolas         | entomologist - senior researcher                                      | INRA                                                                                        | France                                                     |
| Savage, Rick             | President                                                             | Carolina Wetlands Association                                                               | United States of America (the)                             |
| Savage, Melissa          | Associate Professor Emerita                                           | University of California Los Angeles                                                        | United States of America (the)                             |
| Savary, Romain           | Researcher on coral reef response to climate change                   | EPFL, Lausanne                                                                              | Switzerland                                                |
| Savary, Paul             | PhD Student - Landscape genetics                                      | University of Bourgogne-Franche-Comté                                                       | France                                                     |
| Savi, Tadeja             | University Assistant / Post doc                                       | University of Natural Resources and Life Sciences Vienna, BOKU                              | Austria                                                    |
| Savic, Sara              |                                                                       | Scientific veterinary insitute                                                              | Serbia                                                     |
| Savill, Charlotte        | Research Technician                                                   | University of Exeter                                                                        | United Kingdom of Great Britain and Northern Ireland (the) |
| Savli, Matic             | Post-Doc                                                              | Météo France, Centre National de Recherches Météorologiques                                 | France                                                     |
| Savolainen, Ville        | Physics                                                               | CSC - IT Center for Science                                                                 | Finland                                                    |
| Savvides, Andreas        | Research Fellow - Plant Ecophysiology                                 | Cyprus University of Technology                                                             | Cyprus                                                     |
| Savy, Mathilde           | Scientist in Nutrition                                                | Institut de Recherche pour le Développement                                                 | France                                                     |
| Sawyer, Gerald           | Professor (retired) of Archaeology                                    | CCSU                                                                                        | United States of America (the)                             |
| Saxby, Tracey            | Visual Science Communication Consultant (environmental science)       | Visual Science                                                                              | Canada                                                     |
| Saxena, Shivi            | Pursuing PhD in chemistry                                             | Western Michigan University                                                                 | United States of America (the)                             |
| Sayeg Michelazzo, Luan   | Oceanographer with focus on biogeochemistry                           | Instituto Oceanográfico da Universidade de São Paulo                                        | Brazil                                                     |
| Sayrany, Melody          | Masters                                                               | University of British Columbia                                                              | Canada                                                     |
| Scabin, Andressa Barbara | P.h.D candidate                                                       | Universidade Federal do Rio Grande do Norte                                                 | Brazil                                                     |
| Scaccini, Davide         | PhD student, Entomology                                               |                                                                                             | Italy                                                      |
| Scandura, Massimo        | associate professor - Zoology                                         | University of Sassari                                                                       | Italy                                                      |
| Scanlon, Keith           | Master of Engineering Science                                         | University of Galway (M Eng Sc) and Dublin City University (student, MSc in Climate Change) | Ireland                                                    |
| Scao, Vincent            | Paleoclimate                                                          | CEA                                                                                         | France                                                     |
| Scapin, Giovanna         | Sr. Principal Scientist                                               | MSD                                                                                         | United States of America (the)                             |
| scapino, julie           | anthropology                                                          | université paris-est                                                                        | France                                                     |
| Scariot, Aldicir         | Researcher                                                            | Embrapa                                                                                     | Brazil                                                     |
| Scasso, Roberto Adrián   | Profesor                                                              | Universidad de Buenos Aires - CONICET                                                       | Argentina                                                  |
| Schaal, Gauthier         | Assistant professor in marine ecology                                 | Université de Bretagne Occidentale                                                          | France                                                     |
| Schabacker, Theresa      | PhD Student Biology                                                   | Natural History Museum Berlin                                                               | Germany                                                    |
| Schäberle, Till          | Professor                                                             | Justus-Liebig-University of Giessen                                                         | Germany                                                    |
| Schade, Gunnar           | Atmospheric Sciences                                                  | Texas A&M University                                                                        | United States of America (the)                             |
| Schaefer, Hanno          | University Professor of Plant Biodiversity                            | Technical University of Munich                                                              | Germany                                                    |
| Schaefer, Hinrich        | Research Scientist                                                    |                                                                                             | New Zealand                                                |
| Schaefer, Christina      | President, Landscape Ecologist                                        | Schaefer Ecological Solutions                                                               | United States of America (the)                             |
| Schaeffer, Amandine      | Oceanographer                                                         |                                                                                             | Australia                                                  |

|                       |                                                                             |                                                                               |                                |
|-----------------------|-----------------------------------------------------------------------------|-------------------------------------------------------------------------------|--------------------------------|
| Schaeffer, Paul       | 700 E High St.                                                              | Miami University                                                              | United States of America (the) |
| Schafer, Daniel       | Emeritus Professor of Statistics                                            | Oregon State University                                                       | United States of America (the) |
| Schäfer, Marvin       | researcher/ Chemical Ecology                                                | Museum für Naturkunde Berlin                                                  | Germany                        |
| Schäfer, Katrin       | Professor, Evolutionary Anthropology                                        | University of Vienna                                                          | Austria                        |
| Schäfer, Michael      | Junior Scientist / Biochemistry                                             | Universität Innsbruck                                                         | Austria                        |
| Schaffer, Alina       | Behavioral Ecology                                                          | University of Leipzig                                                         | Germany                        |
| Schaffer, Janin       | PostDoc / Physical Oceanography of the Polar Seas                           | Alfred Wegener Institute, Helmholtz Centre for Polar and Marine Research      | Germany                        |
| Schaffner, Urs        | Ecologist                                                                   | CABI                                                                          | Switzerland                    |
| Schafft, Malwina      | PhD student                                                                 | IGB                                                                           | Germany                        |
| Schaller, Stefan      | Medicine                                                                    | Technical University of Munich                                                | Germany                        |
| Scharf, Anne K.       | Movement Ecology                                                            | Max Planck Institute of Animal Behavior                                       | Germany                        |
| Scharmann, Mathias    |                                                                             | University of Lausanne                                                        | Switzerland                    |
| Schatz, George        | Curator                                                                     | Missouri Botanical Garden                                                     | United States of America (the) |
| Schau, John           | Electronics Engineering Technologist                                        |                                                                               | Canada                         |
| Schauberger, Clemens  | PhD Student                                                                 | University of Southern Denmark                                                | Denmark                        |
| Schauer, Isaiah       | Division Chair for Math & Life Sciences, and Associate Professor of Biology | Brazosport College                                                            | United States of America (the) |
| Schaumburg, Federico  | Researcher/Paper based microfluidics                                        | INTEC, CONICET-UNL                                                            | Argentina                      |
| Schechter, Eric       | Professor Emeritus, Mathematics                                             | Vanderbilt University                                                         | United States of America (the) |
| Scheckenbach, Isabel  | Phd Student in Finance and Economics                                        | University of Regensburg                                                      | Germany                        |
| Scheelen, Lucie       | B.Sc. Landscape Ecology                                                     | University of Göttingen                                                       | Germany                        |
| Scheepens, J.F. Niek  | Assistant Professor - Plant Evolutionary Ecology                            | University of Tübingen                                                        | Germany                        |
| Scheer, Clemens       | Senior Researcher                                                           | Karlsruhe Institute for Technology                                            | Germany                        |
| Scheffers, Dirk-Jan   | Associate Professor, molecular microbiology                                 | University of Groningen                                                       | Netherlands (the)              |
| Scheffler, Bernhard   | Senior Lecturer, Physicist, retired                                         | University of Pretoria                                                        | South Africa                   |
| Scheiber, Isabella    | Academic Staff/ Behavioural Biology                                         | The University of Vienna                                                      | Austria                        |
| Scheidegger, Andreas  | Statistician in Aquatic Research                                            | Eawag                                                                         | Switzerland                    |
| Scheidler, Alexander  | Scientist                                                                   | Fraunhofer                                                                    | Germany                        |
| Scheier, Matthias     | Head                                                                        | Ambulatorium für Fetalmedizin                                                 | Austria                        |
| Scheiffele, Lena      | PhD student, Subsurface Hydrology                                           | University of Potsdam                                                         | Germany                        |
| Schell, Jeffrey       | Oceanography Professor                                                      | Sea Education Association                                                     | United States of America (the) |
| Schelling, Michael    | Research Assistant                                                          | Ulm University - Institute for Media Informatics                              | Germany                        |
| Schelz, Charles       | Ecologist                                                                   |                                                                               | United States of America (the) |
| Schembri, Parick J.   | Professor of Biology                                                        | University of Malta                                                           | Malta                          |
| Schenberg, Eduardo    | PhD, neuroscience researcher                                                |                                                                               | Brazil                         |
| Schenk, Hanna         | Post-Doc                                                                    | German Centre for Integrative Biodiversity Research (iDiv) Halle-Jena-Leipzig | Germany                        |
| Schenk, Thomas        | Researcher (chargé de recherche)                                            | Institut Jean Lamour                                                          | France                         |
| Schenkenfelder, Josef | PhD Candidate                                                               | University of Natural Resources and Life Sciences, Vienna                     | Austria                        |

|                        |                                                        |                                                                          |                                                            |
|------------------------|--------------------------------------------------------|--------------------------------------------------------------------------|------------------------------------------------------------|
| Scheper, Reiny         | Senior Scientist / Plant Pathology                     | The New Zealand Institute for Plant & Food Research Limited              | New Zealand                                                |
| Scheppach, Johannes    | Doctor of Medicine, Master of Public Health            | Charité University Berlin                                                | Germany                                                    |
| Scherber, Christoph    | Professor of Animal Ecology                            | University of Münster                                                    | Germany                                                    |
| Scherer, Laura         | Assistant Professor                                    | Leiden University                                                        | Netherlands (the)                                          |
| Scherr, Sara           | Agriculture and Resource Economist, President and CEO  | EcoAgriculture Partners                                                  | United States of America (the)                             |
| Scherwath, Martin      | Senior Staff Scientist and Adjunct Assistant Professor | Ocean Networks Canada, University of Victoria                            | Canada                                                     |
| Scheu, Stefan          | University Professor / Biology                         | University of Göttingen                                                  | Germany                                                    |
| Schewe, Ingo           | Senior researcher (PhD) deep-sea biology and ecology   | Alfred Wegener Institute, Helmholtz Centre for polar and marine research | Germany                                                    |
| Schianchi, Francesco   | PhD research                                           | Maastricht University                                                    | Netherlands (the)                                          |
| Schiavini, Adrián      | Researcher in Applied Ecology                          | Consejo Nacional de Investigaciones Científicas y Técnicas               | Argentina                                                  |
| Schick, Lisa           | Student Physics                                        | Georg-August-Universität Göttingen                                       | Germany                                                    |
| Schick, Thomas         | Professor, Mathematics                                 | University of Göttingen                                                  | Germany                                                    |
| Schiele, Melissa       | PhD researcher                                         | Loughborough University and the Zoological Society of London             | United Kingdom of Great Britain and Northern Ireland (the) |
| Schierenbeck, Anne     | Professor for energy management                        | Hochschule Osnabrück                                                     | Germany                                                    |
| Schild, Johanna        | Researcher in Landscape Ecology                        | Wageningen University                                                    | Netherlands (the)                                          |
| Schimann, Heidy        | Scientist                                              | INRAE                                                                    | France                                                     |
| Schimp, Michael        | Astroparticle Physics                                  | University of Wuppertal                                                  | Germany                                                    |
| Schindler, Johannes    | PhD Climate Science, MSc Physics                       |                                                                          | Switzerland                                                |
| Schindler, David       | Killam Memorial Professor of Ecology Emeritus          | University of Alberta                                                    | Canada                                                     |
| Schindler, Jakob       | Research Associate                                     | Friedrich-Alexander-Universität Erlangen-Nürnberg                        | Germany                                                    |
| Schindler, Janina      | PhD in Physics                                         | TU Dortmund                                                              | Germany                                                    |
| Schipfer, Fabian       | Postdoc scientist / circular bioeconomy                | TU Wien (EU)                                                             | Austria                                                    |
| Schlageter, Summer     | Wildlife Biologist                                     | UC Davis                                                                 | United States of America (the)                             |
| Schläpfer, Nina        | Marine Ecologist                                       |                                                                          | Switzerland                                                |
| Schlecker, Martin      | PhD student in Astrophysics                            | Max Planck Institute for Astronomy                                       | Germany                                                    |
| Schlegel, Sabine       | Biostatistician, Medical Biometry                      | Ulm University                                                           | Germany                                                    |
| Schlegelmann, Paul     | Computer Scientist                                     | NCSU, OSU                                                                | United States of America (the)                             |
| Schleimer, Anna        | Marine Biology                                         | University of St Andrews                                                 | United Kingdom of Great Britain and Northern Ireland (the) |
| Schlenstedt, Stefan    | Astrophysics                                           |                                                                          | Germany                                                    |
| Schleper, Christa      | Professor in Microbiology                              | University of Vienna                                                     | Austria                                                    |
| Schlesinger, William H | President, emeritus                                    | Cary Institute of Ecosystem Studies                                      | United States of America (the)                             |
| Schliephacke, Martin   | scientific employee/human genetics                     | University of Giessen                                                    | Germany                                                    |
| Schloegl, Christian    | Cognitive Biology                                      | German Primate Center                                                    | Germany                                                    |
| Schloegl, Brigitte     | Postdoctoral Researcher, Behavioural Ecology           | University of Leipzig                                                    | Germany                                                    |
| Schlott, Anja          | PhD                                                    | The Francis Crick Institute                                              | United Kingdom of Great Britain and Northern Ireland (the) |

|                                       |                                               |                                                                               |                                |
|---------------------------------------|-----------------------------------------------|-------------------------------------------------------------------------------|--------------------------------|
| Schlupp, Ingo                         | Professor                                     | University of Oklahoma                                                        | United States of America (the) |
| Schluter, Dolph                       | Professor                                     | The University of British Columbia                                            | Canada                         |
| Schmeller, Dirk                       | Professor for Functional Mountain Ecology     | Toulouse INP-ENSAT                                                            | France                         |
| Schmid, Peter A.                      | Prof. Dr.                                     | Hochschule Luzern - Departement Soziale Arbeit                                | Switzerland                    |
| Schmid, Sarah                         | Biologist                                     | University of Lausanne                                                        | Switzerland                    |
| Schmid, Benedikt                      | Postdoctoral Researcher / Geography           | University of Freiburg                                                        | Germany                        |
| Schmidt, Tobias                       | Life Science                                  | Reutlingen University                                                         | Germany                        |
| Schmidt, Hannes                       | Postdoc Ecosystem Science                     | University of Vienna                                                          | Austria                        |
| Schmidt, Katy                         | Cell Biology                                  | Med Uni Vienna                                                                | Austria                        |
| Schmidt, John Paul                    | Research Scientist, Ecology                   | University of Georgia                                                         | United States of America (the) |
| Schmidt, Ulrich Wihelm                | Fisheries management expert/socioeconmist     | free lance consultant                                                         | Cambodia                       |
| Schmidt, Garbi                        | Professor, Cultural Encounters                | Roskilde University                                                           | Denmark                        |
| Schmidt, Goran                        | Wood Science                                  | University Hamburg                                                            | Germany                        |
| Schmidt, Susanne                      | Researcher                                    | Czech Academy for Sciences                                                    | Czech Republic (the)           |
| Schmidt, Lena Katharina               | Environmental Science                         | University of Potsdam                                                         | Germany                        |
| Schmidt, Lisa                         | Phd student, Biophysical Chemistry            | MPI Nat, Göttingen                                                            | Germany                        |
| Schmidt, Ulrich                       | Historian                                     | Akademie der Wissenschaften Mainz                                             | Germany                        |
| Schmidt, Christoph G.                 | Scientific Director, Archaeologist            | Nordfriisk Instituut / Northfrisian Institute                                 | Germany                        |
| Schmidt, JP                           | Lecturer/Ecology                              | University of Georgia                                                         | United States of America (the) |
| Schmidt, Jana                         | Scientific Officer                            | Federal Environment Agency                                                    | Germany                        |
| Schmied, Alexander                    | Technical Assistanc in Conservation biology   | Waldrappteam                                                                  | Austria                        |
| Schmiedel, Ute                        | Scientist, Dryland rangelands                 | Universität Hamburg                                                           | Germany                        |
| Schmitt, Christian                    | Dr.med, DL, MHA                               | VGR                                                                           | Sweden                         |
| Schmitt, Thomas                       | Professor, Cultural Heritage Studies          | Heidelberg Center Cultural Heritage, Heidelberg                               | Germany                        |
| Schmitt Olabisi, Laura                | Associate Professor, Community Sustainability | Michigan State University                                                     | United States of America (the) |
| Schmitt-Siegel, Prof. Helmut M.       | Professor em.                                 | University of Applied Art + Science Bielefeld                                 | Germany                        |
| Schmitz, Daniela                      | PhD in Botany/polar plant communities         | Universidade Federal de Viçosa                                                | Brazil                         |
| Schmitz, Mark                         | Technology Director                           | TSK Flagsol Engineering GmbH                                                  | Germany                        |
| Schmoeller do Prado Rodrigues, Marina | PhD Student - Ecology                         | Universidade Federal do Rio de Janeiro                                        | Brazil                         |
| Schnabel, Kareen                      | Marine Biologist                              |                                                                               | New Zealand                    |
| Schnabel, Florian                     | Doctoral Researcher, Forest Sciences          | German Centre for Integrative Biodiversity Research (iDiv) Halle-Jena-Leipzig | Germany                        |
| Schnattinger, Andrea                  | Biologist                                     | Ombudsoffice for environmental protection                                     | Austria                        |
| Schnecker, Jörg                       | Ecology                                       | University of Vienna                                                          | Austria                        |
| Schneebeli, Martin                    | Senior Scientist (retired)                    | WSL Institute for Snow and Avalanche Research                                 | Switzerland                    |
| Schneider, Sebastian                  | Senior Research Fellow                        | Max-Planck-Institute for Research on Collective Goods                         | Germany                        |
| Schneider, Judith                     | Biologist                                     | University of Lausanne                                                        | Switzerland                    |
| Schneider, Christoph                  | Full Professor, Geography                     | Geography Department, Humboldt-Universität zu Berlin                          | Germany                        |

|                          |                                                            |                                                                                |                                                            |
|--------------------------|------------------------------------------------------------|--------------------------------------------------------------------------------|------------------------------------------------------------|
| Schneider, Lisa          | PhD Candidate Modelling of Marine Primary Production       | Deltares                                                                       | Netherlands (the)                                          |
| Schneider, Eric          | Research Associate, Marine Biology                         | Cape Eleuthera Institute                                                       | Bahamas (the)                                              |
| Schneider, Johannes      | Atmospheric research, senior scientist                     | Max Planck Institute for Chemistry                                             | Germany                                                    |
| Schneider, Antonia       | Institute of Spatial Planning                              | Vienna University of Technology                                                | Austria                                                    |
| Schneider, Achim         | Senior research fellow                                     | University of Applied Sciences Lucerne                                         | Switzerland                                                |
| SCHNEIDER, David         | Professor, Oceanography                                    | Memorial University, St. John's                                                | Canada                                                     |
| Schnitzler, Franz-Rudolf | Scientist/Entomology                                       |                                                                                | New Zealand                                                |
| Schnuelle, Christian     | Researcher in Energy Systems                               | University of Bremen, Department Resilient Energy Systems                      | Germany                                                    |
| Schnurbusch, Thorsten    | Professor (Full) for Developmental Genetics of Crop Plants | Leibniz Institute of Plant Genetics and Crop Plant Research (IPK), Gatersleben | Germany                                                    |
| Schobin, Janosch         | Research Group Leader/Sociology                            | University of Kassel                                                           | Germany                                                    |
| Schoedel, Rainer         | Astrophysicist                                             | Instituto de Astrofísica de Andalucía (CSIC)                                   | Spain                                                      |
| Schoellhamer, David      | Hydrologist                                                | United States Geological Survey (retired)                                      | United States of America (the)                             |
| Schoenberg, Natalia      | Marine Biologist                                           |                                                                                | United States of America (the)                             |
| Schoenenberger, Ursula   | Aquatic Science                                            | Eawag                                                                          | Switzerland                                                |
| Schoenenberger, Rene     | Aquatic research                                           | Eawag                                                                          | Switzerland                                                |
| Schoenherr, Christoph    | Environmental Physics                                      | Scientists for Future                                                          | Germany                                                    |
| Schofield, Lucy          | Geography Lecturer                                         | York St John University                                                        | United Kingdom of Great Britain and Northern Ireland (the) |
| Scholl, Michael          | CEO                                                        | Save Our Seas Foundation                                                       | Switzerland                                                |
| Scholtens, Simone        | Business Science                                           | Amsterdam University of Applied Sciences                                       | Netherlands (the)                                          |
| Scholz, Michael          | Head of EEG lab                                            | Technische Universität Berlin                                                  | Germany                                                    |
| Scholze, Marko           | Associate Professor                                        | Lund University                                                                | Sweden                                                     |
| Schön, Michael           | postdoc, anatomy, neuroscience                             | Institute for Anatomy and Cell Biology, Ulm University                         | Germany                                                    |
| Schön, Daniele           | Researcher in Neurosciences                                | CNRS, Inserm, AMU                                                              | France                                                     |
| Schönenberger, Jürg      | Professor of Structural Botany                             | University of Vienna                                                           | Austria                                                    |
| Schöner, Michael         | Head of Graduate Academy and University Didactics          | University of Greifswald                                                       | Germany                                                    |
| Schönitzer, Klaus        | Apl. Professor                                             | Ludwigs-Maximilians-Universität München                                        | Germany                                                    |
| Schoonvaere, Karel       | PhD student                                                | Ghent University                                                               | Belgium                                                    |
| Schöpke, Benito          | PhD cand. Vegetation ecology                               | Leibniz-Zentrum für Agrarlandschaftsforschung (ZALF)                           | Germany                                                    |
| SCHORLE, Katia           | Ancient History and Archaeology                            | Nice                                                                           | France                                                     |
| Schrader, Günther        | MD - anesthesiologist                                      | Regionshospitalet Nordjylland Hjørring                                         | Denmark                                                    |
| Schradin, Carsten        | Director of Research                                       | CNRS, IPHC-DEPE                                                                | France                                                     |
| Schrama, Maarten         | Assistant Professor                                        | Leiden University                                                              | Netherlands (the)                                          |
| Schramkowski, Barbara    | Professor for Social Work                                  | Duale Hochschule Baden-Württemberg                                             | Germany                                                    |
| Schramm, Michael J.      | M.D.                                                       | University Hospital Cologne                                                    | Germany                                                    |
| Schramski, John          | Associate professor of engineering                         | University of Georgia                                                          | United States of America (the)                             |
| Schraube, Ernst          | Professor, Social Psychology of Technology                 | Roskilde University                                                            | Denmark                                                    |



|                           |                                                                                    |                                                                                                             |                                                            |
|---------------------------|------------------------------------------------------------------------------------|-------------------------------------------------------------------------------------------------------------|------------------------------------------------------------|
| Schreel, Jeroen           | PhD student                                                                        | Ghent University                                                                                            | Belgium                                                    |
| Schreer, Viola            | Post-doc researcher in anthropology                                                | Department of Social and Political Sciences, Brunel University London                                       | Germany                                                    |
| Schreiber, Ingo           | Dipl. Chem. rer. nat                                                               | Aromatarius et Unguentarius                                                                                 | Germany                                                    |
| Schreiber, Rebecca        | Research Officer                                                                   | University of Münster                                                                                       | Germany                                                    |
| Schreiber, Juergen        | Physicist                                                                          | Max Planck Institute for Astronomy                                                                          | Germany                                                    |
| Schreiber, Elizabeth      | Ornithologist: retired                                                             | Los Angeles County Museum of Natural History                                                                | United States of America (the)                             |
| Schreier, Amy             | Associate Professor of Biology                                                     | Regis University                                                                                            | United States of America (the)                             |
| Schreiner, Matthias       | Geologist at retirement                                                            | Hessian state department of nature preservation environment and geology                                     | Germany                                                    |
| Schreiner, Benjamin       | Doctoral Student                                                                   | Institute for Environmental Physics                                                                         | Germany                                                    |
| Schreven, Kees            | PhD candidate                                                                      | Netherlands Institute of Ecology (NIOO-KNAW)                                                                | Netherlands (the)                                          |
| Schriever, Tiffany        | Assistant professor                                                                | Western Michigan University                                                                                 | United States of America (the)                             |
| Schrijvers-Gonlag, Marcel | PhD student in plant ecology                                                       | Inland Norway University of Applied Sciences                                                                | Norway                                                     |
| Schrödl, Michael          | Professor and curator, Zoology                                                     | SNSB - Bavarian State Collection of Zoology, LMU - Ludwig Maximilians Universität München, GeoBioCenter LMU | Germany                                                    |
| Schroeder, Frank          | Physics                                                                            | University of Delaware                                                                                      | United States of America (the)                             |
| Schroeder, Katrin         | Researcher -                                                                       | CNR-Istituto di Scienze Marine (ISMAR)                                                                      | Italy                                                      |
| Schroeder, Heike          | Professor of Environmental Governance                                              | University of East Anglia                                                                                   | United Kingdom of Great Britain and Northern Ireland (the) |
| Schroot, Zoë              | PhD Mathematics                                                                    | University of Amsterdam                                                                                     | Netherlands (the)                                          |
| Schrudde, Daniela         | Veterinarian / Program Director                                                    |                                                                                                             | Germany                                                    |
| Schtickzelle, Nicolas     | Professor of Ecology and Conservation Biology                                      | Université catholique de Louvain                                                                            | Belgium                                                    |
| Schubert, Sven            | Professor for Plant Nutrition                                                      | Justus Liebig University Giessen                                                                            | Germany                                                    |
| Schubert, Philipp         | Marine Biologist                                                                   | GEOMAR - Helmholtz Center for Ocean Research Kiel                                                           | Germany                                                    |
| Schubert, Stefan          | Junior Researcher / Computer Science                                               | Institute of IT-Security Research                                                                           | Austria                                                    |
| Schubert, Nadine          | Marine Researcher                                                                  | Center of Marine Sciences (CCMAR)                                                                           | Portugal                                                   |
| Schuck, Götz              | Structure and Dynamics of Energy Materials                                         | Helmholtz Centre Berlin for Materials and Energy                                                            | Germany                                                    |
| schueler, fred            | Research Curator                                                                   | Fragile Inheritance Natural History                                                                         | Canada                                                     |
| Schuerz, Florian          | Environmental Science                                                              | eawag                                                                                                       | Switzerland                                                |
| Schuessler, Steffen       | Technician                                                                         | MPI of Biochemistry                                                                                         | Germany                                                    |
| Schug, Hannah             | PhD Environmental Toxicologist                                                     | Eawag                                                                                                       | Switzerland                                                |
| Schug, Malcolm            | Associate Professor of Biology                                                     | University of North Carolina Greensboro                                                                     | United States of America (the)                             |
| Schuh, Matheus            | PhD Candidate                                                                      | Verimag                                                                                                     | France                                                     |
| Schuler, Reiner           | Forester                                                                           | retired                                                                                                     | Australia                                                  |
| Schuler, Douglas          | Professor emeritus, computer science                                               | The Evergreen State College                                                                                 | United States of America (the)                             |
| Schüler, Thomas           | CEO, Computer Scientist                                                            | Halocline GmbH & Co. KG                                                                                     | Germany                                                    |
| Schulman, Leif            | Director, Professor, Biodiversity Science                                          | Finnish Museum of Natural History LUOMUS, University of Helsinki                                            | Finland                                                    |
| Schulte, Sven             | NGO Project Director/ MA Environmental Security (UN-mandated University for Peace) | Various                                                                                                     | Germany                                                    |

|                      |                                            |                                                                                 |                                |
|----------------------|--------------------------------------------|---------------------------------------------------------------------------------|--------------------------------|
| Schulte, Sonja       | Organic Geochemistry                       |                                                                                 | Germany                        |
| Schulte, Joern       | PhD in Business Administration & Economics | Ruhr-University Bochum                                                          | Germany                        |
| Schultner, Eva       | Postdoctoral researcher                    | Universität Regensburg                                                          | Germany                        |
| Schulz, Christiane   | PostDoc, Atmospheric Sciences              | Max Planck Institute for Chemistry; Leibniz Institute for Tropospheric Research | Germany                        |
| Schulz, Robert Simon |                                            | Federal Institute of Hydrology                                                  | Germany                        |
| Schulz, Christian    | Anesthesiology                             | Technical University Munich                                                     | Germany                        |
| Schulz, Christof     | Professor                                  | Institute for Combustion and Gas Dynamics, University of Duisburg-Essen         | Germany                        |
| Schulz, Karsten      | Assistant Professor of Political Science   | University of Groningen                                                         | Netherlands (the)              |
| Schulze, Christian   | General practitioner                       | Praxis Dres Wagner und Schulze                                                  | Germany                        |
| Schulze, Wito        | Medicine                                   | Orthopedic surgery                                                              | Germany                        |
| Schulze, Sebastian   | Civil Engineering                          | Federal Institute of Materials Research and Testing (BAM), Berlin, Germany      | Germany                        |
| Schulze, Jonathan    | M.Sc. in Renewable Energies                | Beuth Hochschule für Technik Berlin                                             | Germany                        |
| Schulzke, Carola     | Professor/Chair of Bioinorganic Chemistry  | Universitaet Greifswald                                                         | Germany                        |
| Schumacher, Paul     | Prof, Computer Science                     | Winona State University                                                         | United States of America (the) |
| schumann, susann     | gp                                         | hausarztpraxis im kunkerkiez, berlin                                            | Germany                        |
| Schure, K.M          | Researcher Energy                          | PBL                                                                             | Netherlands (the)              |
| Schure, Jolien       | Associate, Social Science                  | CIFOR                                                                           | Sweden                         |
| Schüssler, Manfred   | Astrophysicist                             | Max Planck Institute for Solar System Research                                  | Germany                        |
| Schüßler, Christina  | PhD Student                                | Staatliches Museum für Naturkunde Stuttgart                                     | Germany                        |
| Schuster, William J. | Full Profesor -Astronomy                   | Institute of Astronomy, UNAM                                                    | Mexico                         |
| Schuster, Richard    | Liber Ero Postdoctoral Fellow              | Carleton University                                                             | Canada                         |
| Schuster, Sandra     | researcher                                 | TU Munich                                                                       | Germany                        |
| Schutte, Hester      | Astrophysicist                             | North-West University                                                           | South Africa                   |
| Schütte, Stefanie    | Researcher, Hydrology                      | University of KwaZulu-Natal                                                     | South Africa                   |
| Schütze, Nora        |                                            | University of Kassel                                                            | Germany                        |
| Schutzman, Corry     | Environmental Biology                      | SUNY college of Environmental Science and Forestry                              | United States of America (the) |
| Schuv, Malcolm       | Associate Professor of Biology             | University of North Carolina Greensboro                                         | United States of America (the) |
| Schwab, Niels        | Research assistant                         | Center for Earth System Research and Sustainability (CEN), Universität Hamburg  | Germany                        |
| SCHWABL, HUBERT      | PROFESSOR OF BIOLOGY                       | WASHINGTON STATE UNIVERSITY                                                     | United States of America (the) |
| Schwager, Kathy      | Ecologist                                  |                                                                                 | United States of America (the) |
| Schwander, Tanja     | Professor - Evolution                      | University of Lausanne                                                          | Switzerland                    |
| Schwantes, Ulrich    | Prof. Dr. med., General Practitioner       | Institute for General Practice, MEDizinische Hochschule Brandenburg             | Germany                        |
| Schwartz, Orlando    | Ecology of animals                         | Retired professor                                                               | United States of America (the) |
| Schwartz, Christophe | Professor - urban soil sciences            | Université de Lorraine                                                          | France                         |
| Schwarz, Jana        | PhD, Agricultural Economics                | KU Leuven                                                                       | Belgium                        |
| Schwarz, Abby        | Tenured Instructor, Faculty of Biology     | Langara College (ret'd)                                                         | Canada                         |
| Schwarz, Julia       | Postdoctoral researcher in Forest sciences | University of Freiburg                                                          | Germany                        |

|                          |                                                         |                                                                   |                                                            |
|--------------------------|---------------------------------------------------------|-------------------------------------------------------------------|------------------------------------------------------------|
| Schwarz, Jill            | Lecturer, Marine Remote Sensing                         | University of Plymouth                                            | United Kingdom of Great Britain and Northern Ireland (the) |
| Schwarzbach, Erik        | Researcher, Plant genetics and breeding, biostatistics  | retired                                                           | Czech Republic (the)                                       |
| Schwarzer, Julia         | Junior group leader                                     | Museum Alexander Koenig Bonn                                      | Germany                                                    |
| Schwegmann, Sebastian    | Phd-Student, Environmental Science                      | Albert-Ludwigs Universität Freiburg                               | Germany                                                    |
| Schweiger, Brittany      | Wildlife Science Graduate Student                       | New Mexico State University                                       | United States of America (the)                             |
| Schweigkofler, Wolfgang  | Research Associate Professor Plant Pathology            | Dominican University of California                                | United States of America (the)                             |
| Schweinfurth, Manon      | Lecturer                                                | University of St Andrews                                          | United Kingdom of Great Britain and Northern Ireland (the) |
| Schweinsberg, Maximilian | Post Doc                                                | Animal Ecology, Evolution and Biodiversity Ruhr University Bochum | Germany                                                    |
| Schweisfurth, Hans       | Director/Respiratory Diseases                           | Institute for Pulmonary Research (IPR)                            | Germany                                                    |
| Schweithelm, James       | Geographer/Tropical Forests Governance Expert           | Forest Mountain Services                                          | United States of America (the)                             |
| Schweitzer, Alejandro    | Reserarcher in political ecology                        | CONICET                                                           | Argentina                                                  |
| Schweizer, Daniella      | Postdoc                                                 | ETH                                                               | Switzerland                                                |
| Schwendenmann, Luitgard  |                                                         | School of Environment, University of Auckland                     | New Zealand                                                |
| Schwensow, Nina          | Biologist                                               | University of Ulm                                                 | Germany                                                    |
| Schwerdtner, Ulrike      | Soil Ecology & Biogeochemistry                          | University of Bayreuth                                            | Germany                                                    |
| Schwieder, Marcel        | Researcher (PHD)                                        | Humboldt-Universität zu Berlin                                    | Germany                                                    |
| Schwientek, Marc         | Research Assistant, Hydrology                           | Center of Applied Geoscience, University of Tuebingen             | Germany                                                    |
| Schwitalla, Jan          | Microbiology                                            |                                                                   | Germany                                                    |
| Schwonbeck, Susanne      | Senior Risk Assessor                                    | Fraunhofer Institute for Toxicology and Experimental Medicine     | Germany                                                    |
| Scollay, Roland          | Professor                                               | University of Melbourne                                           | Australia                                                  |
| Scollick, Andy           | Independent Consultant / PhD in Sustainability Science  | Self-employed                                                     | Ireland                                                    |
| Scott, Shaunna           | Sociology (Associate Professor)                         | University of Kentucky                                            | United States of America (the)                             |
| Scott, Terence           | Senior Teaching Fellow                                  | University of Otago                                               | New Zealand                                                |
| Scott, Nicholas          | Lead Research Scientist, Astronomy                      |                                                                   | United States of America (the)                             |
| Scott, Alexander         | Research and Development Technologist                   | Heathcoat Fabrics Limited                                         | United Kingdom of Great Britain and Northern Ireland (the) |
| Scott, Glenda            | Forester                                                | US Forest #ervice (retired)                                       | United States of America (the)                             |
| Scott, Alyssa            | Cetacean Acoustician                                    | National Oceanic & Atmospheric Administration                     | United States of America (the)                             |
| Scott, Christopher       | Research technician archaeology                         | University of Liverpool                                           | United Kingdom of Great Britain and Northern Ireland (the) |
| Scott, Monique           | PhD Student - Cell Biology                              | University of Edinburgh                                           | United Kingdom of Great Britain and Northern Ireland (the) |
| Scotti, Ivan             | Senior scientist, forest ecology / evolutionary biology | INRA                                                              | France                                                     |
| Scotti, Alberto          | Freshwater Ecology                                      | Eurac Research                                                    | Italy                                                      |
| Scow, Kate               | Professor Soil Science                                  | UC Davis                                                          | United States of America (the)                             |
| sculfort, ombeline       | DOCTOR BIOCHEMISTRY                                     | CNRS                                                              | France                                                     |

|                                |                                                                                |                                                                                                                |                                                               |
|--------------------------------|--------------------------------------------------------------------------------|----------------------------------------------------------------------------------------------------------------|---------------------------------------------------------------|
| Scullion, Jason                | Assistant Professor of Environmental Studies                                   | McDaniel College                                                                                               | United States of America (the)                                |
| Seaborn, Travis                | NSF Research Fellow                                                            | University of Idaho                                                                                            | United States of America (the)                                |
| Seabra, Sofia                  | Researcher - Biology                                                           | Faculty of Sciences, University of Lisbon                                                                      | Portugal                                                      |
| Seah, Samantha                 | PhD Student                                                                    | EMBL Heidelberg                                                                                                | Germany                                                       |
| Seal, Alan                     | Plant Breeder                                                                  |                                                                                                                | New Zealand                                                   |
| Searle, Josephine              | Supervising hydrogeologist                                                     | Department of Water and Environmental Regulation,<br>Western Australai                                         | Australia                                                     |
| Sears, Kenneth                 | Civil Engineering                                                              | Carnegie Mellon University                                                                                     | United States of America (the)                                |
| Seastedt, Tim                  | Professor emeritus, EBIO and Senior Fellow, INSTAAR                            | University of Colorado, Boulder                                                                                | United States of America (the)                                |
| Seavey, Matthew                | Scientist                                                                      | Heat Biologics, Inc.                                                                                           | United States of America (the)                                |
| Sebbenn, Alexandre             | Prfoessor doctor in Forest Genetics                                            | Sao Paulo Forestr Institute                                                                                    | Brazil                                                        |
| Séchaud, Robin                 | Phd student in Biology/Ecology                                                 | Lausanne University, Department of Ecology and<br>Evolution                                                    | Switzerland                                                   |
| Sedda, Luigi                   | Lecturer in Spatial Epidemiology                                               | Lancaster University                                                                                           | United Kingdom of Great Britain<br>and Northern Ireland (the) |
| Sedlon, Pavel                  | Cardiologist                                                                   | Central Military Hospital Prague                                                                               | Czech Republic (the)                                          |
| Sedmáková, Denisa              | researcher                                                                     | Technical University in Zvolen                                                                                 | Slovakia                                                      |
| Seeger, Danielle               | Bioprocess engineering                                                         | University of Cape Town                                                                                        | South Africa                                                  |
| Seehausen, Ole                 | Professor / Ecology & Evolution                                                | University of Bern + Eawag, Swiss Federal Institute for<br>Aquatic Science & Technology                        | Switzerland                                                   |
| Seeland, Marco                 | Ecological Informatics                                                         | TU Ilmenau                                                                                                     | Germany                                                       |
| Seelig, Frederik               | Medical Entomology                                                             | London School of Hygiene & Tropical Medicine                                                                   | United Kingdom of Great Britain<br>and Northern Ireland (the) |
| Seely, Mary                    | Board Member and Previous Director                                             | Desert Research Foundation of Namibia                                                                          | Namibia                                                       |
| Seery, Marianne                | Biochemistry Graduate                                                          | University College Dublin                                                                                      | New Zealand                                                   |
| Segami, Carolina               | PhD student in evolutionary biologist                                          | Uppsala University                                                                                             | Peru                                                          |
| Segecova, Anna                 | Research Associate, Biologist                                                  | University of Technology Sydney, Climate Change<br>Cluster                                                     | Australia                                                     |
| Segelbacher, Gernot            | Professor                                                                      | University Freiburg                                                                                            | Germany                                                       |
| Seger, Maud                    | Soil science                                                                   | Inra                                                                                                           | France                                                        |
| Segers, Jan                    |                                                                                | University of Antwerp                                                                                          | Belgium                                                       |
| Segers, Hendrik                |                                                                                | Royal Belgian Institute of Natural Sciences                                                                    | Belgium                                                       |
| Segers, Philippe               | Head of European High-Performance Computing<br>projects. Atmospheric Physicist | GENCI                                                                                                          | France                                                        |
| Seghieri, Josiane              | Research Director, Functional Ecology & Agroforestry<br>in West Africa         | Institut de Recherche pour le Développement<br>(IRD, French Research Institute for Sustainable<br>Development) | France                                                        |
| Segner, Helmut                 | Professor/Veterinary Sciences                                                  | University of Bern                                                                                             | Switzerland                                                   |
| Segnon, Alcade                 | PhD Candidate / Agricultural & Environmental<br>Sciences                       |                                                                                                                | Benin                                                         |
| Segovia-Salcedo, María Claudia | Associate Professor                                                            | Universidad de las Fuerzas Armadas - ESPE                                                                      | Ecuador                                                       |
| Segur, Miguel                  | Senior Consultant                                                              | CAF                                                                                                            | Chile                                                         |

|                          |                                                                    |                                                                   |                                                            |
|--------------------------|--------------------------------------------------------------------|-------------------------------------------------------------------|------------------------------------------------------------|
| Segura, Isis Angélica    | PhD student                                                        | UNIFESP                                                           | Brazil                                                     |
| Séguret, Alice           | Postdoctoral researcher                                            | Westfälische Wilhelms-Universität Münster                         | Germany                                                    |
| Seibel, Marc-Ansgar      | Prof. Se.                                                          | University of Applied Sciences Koblenz                            | Germany                                                    |
| Seidel, Jean Luc         | Senior Researcher                                                  | CNRS                                                              | France                                                     |
| Seidel, Andreas          | Lecturer SCM/SCM for New Energies                                  | University of Applied Science Duesseldorf HSD                     | Germany                                                    |
| Seidl, Amy               | Senior Lecturer                                                    | University of Vermont                                             | United States of America (the)                             |
| seidler, ramon           | microbiology, senior research scientist                            | oregon state univ. professor; senior research scientist<br>US EPA | United States of America (the)                             |
| Seidler, Dr. Ramon       | microbiology, senior research scientist US EPA, retired            | oregon state univ. professor; senior research scientist<br>US EPA | United States of America (the)                             |
| Seipel, Katja            | Biomedical research scientist                                      | University of Bern                                                | Switzerland                                                |
| Seitsonen, Oula          | Postdoctoral researcher, archaeology                               | University of Oulu / University of Helsinki                       | Finland                                                    |
| Seitz, Julia             | Post Doc Social Sciences                                           | Johannes Gutenberg University Mainz                               | Germany                                                    |
| Seitz, Philine           | Medical Doctor                                                     | Hospital                                                          | Germany                                                    |
| Seixas, Cristiana        | Academic Researcher                                                | University of Campinas                                            | Brazil                                                     |
| Sekonya, James George    | Doctoral Researcher - Environmental and Geographical Sciences      | University of Cape Town                                           | South Africa                                               |
| Selbach Hofmann, Gabriel | Researcher in climatology and ecology                              | Universidade Federal do Rio Grande do Sul                         | Brazil                                                     |
| Selden, Michael          | CEO & Biochemist                                                   | Finless Foods                                                     | United States of America (the)                             |
| Sellanes, Javier         | Professor / Deep sea and seamount benthic ecology                  | Universidad Catolica del Norte                                    | Chile                                                      |
| Sellers, Jonathan        | Lecturer in Medicinal Chemistry                                    | Newcastle University                                              | United Kingdom of Great Britain and Northern Ireland (the) |
| Selle, Benny             | Professor of Hydrology                                             | Beuth University Of Applied Science Berlin                        | Germany                                                    |
| Sellenriek, Elisabeth    | PhD Ecology                                                        | UFZ - Centre for Environmental Research                           | Germany                                                    |
| Selling, Jörn            | Biologist                                                          | firmm.org                                                         | Spain                                                      |
| Selmeczy, Géza           |                                                                    | University of Pannonia                                            | Hungary                                                    |
| Selsis, Franck           | Researcher - astrophysics                                          | CNRS                                                              | France                                                     |
| Selva Fernandez, Nuria   | Associate Professor, ecology                                       | Institute of Nature Conservation Polish Academy of Sciences       | Poland                                                     |
| Selvais, Arnaud          | Sciences teacher in High School                                    | Second'Air                                                        | Belgium                                                    |
| Selz, Oliver             | Postdoc                                                            | EAWAG                                                             | Switzerland                                                |
| Semensatto, Décio        | Associate Professor                                                | Universidade Federal de São Paulo                                 | Brazil                                                     |
| Sementchoukova, Irina    | MSc Candidate                                                      | Queen's University                                                | Canada                                                     |
| Semenza, Jan C.          | Public Health                                                      | Stockholm Environmental Institute                                 | Sweden                                                     |
| Semmens, Caitlin (Sam)   | Environmental Sciences                                             | ESSA Technologies Ltd.                                            | Canada                                                     |
| Semmouri, Ilias          | Academic Assistant - PhD candidate in Applied Biological Sciences  | UGent                                                             | Belgium                                                    |
| Semper-Pascual, Asunción | PhD student                                                        | Humboldt-Universität zu Berlin                                    | Germany                                                    |
| Sempere-Torres, Daniel   | Director of centre of Applied Research in Hydrometeorology (CRAHI) | Universitat Politecnica de Catalunya - Barcelonatech (UPC)        | Spain                                                      |
| Senar, Juan Carlos       | Head of Research                                                   | Museu de Ciències Naturals de Barcelona                           | Spain                                                      |
| Señaris, Celsa           | Associated Researcher, Herpetology                                 | PROVITA                                                           | Venezuela (Bolivarian Republic of)                         |

|                                |                                                         |                                                                                                                             |                                |
|--------------------------------|---------------------------------------------------------|-----------------------------------------------------------------------------------------------------------------------------|--------------------------------|
| Senay, Senait                  | Assistant Professor                                     | University of Minnesota                                                                                                     | United States of America (the) |
| Sendzimir, Jan                 | Systems Ecologist                                       | Institute of Hydrobiology and Aquatic Ecosystem Management, University of Natural Resources and Applied Life Science (BOKU) | Austria                        |
| Senecah, Susan                 | Professor Emerita, Environmental Studies                | State University of New York College of Environmental Science & Forestry                                                    | United States of America (the) |
| Senese, Andrea                 | Zoologist                                               |                                                                                                                             | Italy                          |
| Senior, John                   | Postdoctoral researcher                                 | Swedish University of Agricultural Sciences                                                                                 | Sweden                         |
| Senkondo, Neema                | Assistant lecturer                                      | University of Dodoma                                                                                                        | Tanzania, United Republic of   |
| Senta, Ivan                    | Senior Research Associate / Environmental Chemistry     | Rudjer Boskovic Institute                                                                                                   | Croatia                        |
| sentchilo, vladimir            | Senior researcher                                       | University of Lausanne                                                                                                      | Switzerland                    |
| Sentinella, Alexander          | Macroecology and evolutionary ecology                   | UNSW Sydney                                                                                                                 | Australia                      |
| Seoane Blanco, Mateo           | PhD candidate                                           | Centro Nacional de Biotecnología                                                                                            | Spain                          |
| Sepplet, Ralf                  | Professor for Landscape Ecology                         | Helmholtz Centre fpr Environmental Research                                                                                 | Germany                        |
| Sepulveda Chaverra, Juan David | PhD in sustainable development                          | Fundación Enerstud para la sostenibilidad e innovación                                                                      | Colombia                       |
| Sequeira, Miguel               | Professor Botany & Ecology                              | University of Madeira                                                                                                       | Portugal                       |
| Seraphim, Noemy                | Professor of Biology                                    | Instituto de Educação Ciência e Tecnologia de São Paulo                                                                     | Brazil                         |
| Serca, Dominique               | Assistant Professor                                     | Laboratoire d'Aerologie, UMS CNRS-UPS, Universite de Toulouse                                                               | France                         |
| Serén, Nina                    | PhD student / Biological Sciences                       | CIBIO-InBIO Porto University of Sciences                                                                                    | Portugal                       |
| Sereni, Laura                  | PhD student                                             | INRA-ENS                                                                                                                    | France                         |
| Seress, Gábor                  | Post doc research fellow / Ecology, Behavioural Ecology | University of Pannonia                                                                                                      | Hungary                        |
| Sergeant, Anne-Sophie          | researcher in forest ecology                            | CONICET-INTA                                                                                                                | Argentina                      |
| Sergeyev, Maksim               | Research Assistant                                      | Texas A&M University - Kingsville                                                                                           | United States of America (the) |
| Sergio, Fabrizio               | Researcher / ecology                                    | Estación Biológica de Doñana - CSIC                                                                                         | Spain                          |
| Serino, Dominic                | Conservation Biology                                    | Audubon Maryland-DC                                                                                                         | United States of America (the) |
| Seror, Marta                   | Outreach coordinator                                    | IFCA                                                                                                                        | Spain                          |
| Seroude, Laurent               | Associate-Professor Biology                             | Queen's University                                                                                                          | Canada                         |
| Serpa, Dalila                  | Researcher                                              | Centre for Environmental and Marine Studies, Department of Environment and Planning, University of Aveiro                   | Portugal                       |
| Serra, Lorenzo                 | Senior Researcher Ornithology                           | Istituto Superiore per la Protezione e Ricerca Ambientale                                                                   | Italy                          |
| Serra, Gianluca                | Ecologist and biologist                                 | freelance                                                                                                                   | Italy                          |
| SERRADILLA, GARCIA             | PHD/VIROLOGY                                            | CNB-CSIC                                                                                                                    | Spain                          |
| Serralheiro, Ricardo           | Professor and Researcher, emeritus                      | MED-Mediterranean Institute for Agriculture, Environment and Development-University of Évora                                | Portugal                       |
| Serranito, Bruno               | PhD Ecology and marine biology                          | Université de Limoges                                                                                                       | France                         |
| Serrano, David                 | Tenure scientific, ecology                              | EBD-CSIC                                                                                                                    | Spain                          |
| Serrano, Mario                 | Associate Professor                                     | Center for Genome Sciences, UNAM                                                                                            | Mexico                         |

|                        |                                                                |                                                                            |                                                            |
|------------------------|----------------------------------------------------------------|----------------------------------------------------------------------------|------------------------------------------------------------|
| Serrano, Daniela       | Phd candidate                                                  | Cide                                                                       | Mexico                                                     |
| Serrano-Saiz, Esther   | Principal Investigator. Development and Neuroscience           | CBMSO-CSIC                                                                 | Spain                                                      |
| SERRE, Guy             | Professor of Cell Biology                                      | Toulouse University                                                        | France                                                     |
| Serres, Coline         | PhD Student in Management Science                              | Université libre de Bruxelles                                              | Belgium                                                    |
| Serret, Pablo          | Associate Professor Ecology / Oceanography                     | University of Vigo                                                         | Spain                                                      |
| Serret, Hortense       | Postdoc researcher, Ecology                                    | Ewha Womans University                                                     | Korea (the Republic of)                                    |
| Sersic, Alicia Noemi   | Principal resercher. Evolutinary abiology                      | Instituto Multidisciplinario de Biologia Vegetal CONICET                   | Argentina                                                  |
| Sérsic, Alicia         | Scientific researcher                                          | Instituto multidisciplinario de biologia vegetal                           | Argentina                                                  |
| Servedio, Maria        | Professor of Biology                                           | University of North Carolina, Chapel Hill                                  | United States of America (the)                             |
| Seuntjens, Eve         | Professor of Biology                                           | KU Leuven                                                                  | Belgium                                                    |
| Séverin, Pistre        | Professor of University                                        | Montpellier University                                                     | France                                                     |
| Sevestre, Heidi        | Glaciology                                                     | St Andrews University                                                      | United Kingdom of Great Britain and Northern Ireland (the) |
| Sévigny, Marcel        | Ph. D. Candidate (student)                                     | Université Laval                                                           | Canada                                                     |
| Sevink, Sevink         | Emeritus Full Professor in Physical Geography and Soil Science | University of Amsterdam, Institute for Biodiversity and Ecosystem Dynamics | Netherlands (the)                                          |
| SEYLER, Patrick        | Headmaster of Hydrosclnces Lab. Montpellier, France            | IRD                                                                        | France                                                     |
| Seymour, Colleen       | Ecologist                                                      | South African National Biodiversity Institute                              | South Africa                                               |
| Sfair, Julia           | Visiting Professor                                             | Universidade Federal do Ceará                                              | Brazil                                                     |
| Sforzi, Andrea         | Director                                                       | Maremma Natural History Museum                                             | Italy                                                      |
| Sgolastra, Fabio       | Assistant professor in Applied Entomology                      | University of Bologna                                                      | Italy                                                      |
| Shabalin, Ivan         | Research Scientist, Biophysics                                 | University of Virginia                                                     | United States of America (the)                             |
| Shacham, Boaz          | Manager of Herpetological Collection                           | National Natural History Collections, The Hebrew University of Jerusalem   | Israel                                                     |
| Shackelford, Nancy     |                                                                | Colorado University at Boulder                                             | United States of America (the)                             |
| Shackleton, Sheona     | Climate and Development                                        | Univ of Cape Town                                                          | South Africa                                               |
| Shackleton, Charlie    | Environmental scientist                                        | Rhodes University                                                          | South Africa                                               |
| shackley, tilly        | PhD Student                                                    | Imperial College London                                                    | United Kingdom of Great Britain and Northern Ireland (the) |
| Shadkam, Somayeh       | Senior Scientist                                               | Geothe University                                                          | Germany                                                    |
| Shadrack, Andy         | Agriculture/Political Science                                  | Retired                                                                    | Canada                                                     |
| Shafer, Craig          | Conservation Biologist                                         | George Wright Society                                                      | United States of America (the)                             |
| Shafir, Sharoni        | Professor of Entomology                                        | The Hebrew University of Jerusalem                                         | Israel                                                     |
| Shah, Poonam           | PhD Student                                                    | University of Warwick                                                      | United Kingdom of Great Britain and Northern Ireland (the) |
| Shah, Aisha            | Medical Doctor                                                 | National health service                                                    | United Kingdom of Great Britain and Northern Ireland (the) |
| Shahsavari, Azadeh     |                                                                | Aarhus University                                                          | Denmark                                                    |
| Shahyar, Mohammad Reza | MD. Surgeon                                                    |                                                                            | Germany                                                    |
| Shake, Corey           | Wildlife Biologist                                             |                                                                            | United States of America (the)                             |
| Shakou, Louisa Marie   | Risk Assessment                                                | University of Antwerp                                                      | Belgium                                                    |

|                      |                                                         |                                                       |                                                            |
|----------------------|---------------------------------------------------------|-------------------------------------------------------|------------------------------------------------------------|
| SHAMBROOK, KEVIN     | PH.D ENGINEERING                                        | RETIRED                                               | United States of America (the)                             |
| Shamimi, Leili       | Research scientists                                     |                                                       | Australia                                                  |
| Shanas, Uri          | Conservation Biology                                    | University of Haifa                                   | Israel                                                     |
| Shanee, Sam          | Projects Director                                       | Neotropical Primate Conservation                      | Peru                                                       |
| Shangguan, Wei       | Associate professor                                     | Sun Yat-sen University                                | China                                                      |
| Shank, Genevieve     | Wildlife Biologist                                      |                                                       | United States of America (the)                             |
| Shankar, Shiva       | Professor, Applied Mathematics                          | Chennai Mathematical Institute                        | India                                                      |
| Shannon, Caitlyn     | MSc student in Marine Biology                           | Victoria University of Wellington                     | New Zealand                                                |
| Shannon, Joe         | Adjunct Professor                                       | Northern AZ University                                | United States of America (the)                             |
| Shapiro, Gary        | President of Environmental NGO                          | Orang Utan Republik Foundation, Inc.                  | United States of America (the)                             |
| Shapiro, Robert      | Simulation Models and Business Processes                | Town of Wellfleet Energy and Climate Committee        | United States of America (the)                             |
| Sharma, Richa        | Research Scientist                                      | Public Health Foundation of India                     | India                                                      |
| Sharma, Gyan Prakash | Assistant Professor                                     | University of Delhi, Delhi                            | India                                                      |
| Sharma, Vivek        | Biotechnology                                           |                                                       | India                                                      |
| Sharma, Dhruvaraj    | PhD Student                                             | QUT                                                   | Australia                                                  |
| Sharma, Akanksha     | Doctoral Student - Integrative Conservation and Ecology | Odum School of Ecology, University of Georgia         | India                                                      |
| Sharp, Joanna        | Agricultural systems modelling                          | The New Zealand Institute for Plant and Food Research | New Zealand                                                |
| Sharp, Carly         | Civil Engineering                                       | University of Michigan                                | United States of America (the)                             |
| Sharp, Sean          | Postdoctoral fellow                                     | University of Michigan                                | United States of America (the)                             |
| Sharp, Geoffrey      | Bsc. Environmental Geoscience                           | Acadia University                                     | Canada                                                     |
| Sharpe, Lisa         | Health Science BSc & Science PGCE QTS                   | Kings College London & University of Exeter           | United Kingdom of Great Britain and Northern Ireland (the) |
| SHARPE, WILLIAM      | Professor Emeritus of Forest Hydrology                  | The Pennsylvania State University                     | United States of America (the)                             |
| Shaw, Sigourney      | HBSc Biology                                            | University of Ottawa                                  | Canada                                                     |
| Shaw, Alex           |                                                         | The University of Auckland                            | New Zealand                                                |
| Shaw, David          | Physicist                                               | University of York                                    | United Kingdom of Great Britain and Northern Ireland (the) |
| Shea, Glenn          | Senior Lecturer in Veterinary Anatomy                   | University of Sydney                                  | Australia                                                  |
| Shea, Daniel         | Postdoctoral Research Fellow / Ph.D. in Agriculture     | Iwate Biotechnology Research Center                   | Japan                                                      |
| Shearer, Julie       | Assistant Professor of Biology                          | Georgia Gwinnett College                              | United States of America (the)                             |
| Shearman, Philip     | Researcher                                              | Australian National University                        | Australia                                                  |
| Shearman, David      | Emeritus Professor, Medicine                            | Adelaide University                                   | Australia                                                  |
| Sheehan, Stephen     | Divisional Director (Qualified Meteorologist)           | Willis Towers Watson                                  | United Kingdom of Great Britain and Northern Ireland (the) |
| Sheehan, Tim         | Environmentals Sciences                                 |                                                       | United States of America (the)                             |
| Sheehy, Griffin      |                                                         | Florida Museum of Natural History                     | United States of America (the)                             |
| Sheeren, David       | Associate Professor / Geographical Information Sciences | Toulouse INP-ENSAT                                    | France                                                     |
| Sheffield, Dr. Steve | Professor of Biology                                    | Bowie State University                                | United States of America (the)                             |



|                                           |                                                           |                                                                                            |                                                            |
|-------------------------------------------|-----------------------------------------------------------|--------------------------------------------------------------------------------------------|------------------------------------------------------------|
| Sheik Abbass, Mohammad Imthiaz Zulfur Ali | Forest conservation & Enforcement officer                 | Forestry Service                                                                           | Mauritius                                                  |
| Shek, Katherine                           | Ph.D. candidate                                           | Institute of Ecology and Evolution, University of Oregon                                   | United States of America (the)                             |
| Shekhawat, Narpatt                        | Retired Professor of Botany                               | Botany Department , jai Narain Vyas University, Jodhpur                                    | United States of America (the)                             |
| Shell, Karen                              | Associate Professor                                       | Oregon State University                                                                    | United States of America (the)                             |
| Shen, Jiawei                              | Computing Science/Earth and Atmospheric Sciences          | University of Alberta                                                                      | Canada                                                     |
| Shenkute, Moges Beletew                   | Fishery and Limnology, and Fish parasitologist            | Debre Markos University, Natural and Computational Sciences College, Department of Biology | Ethiopia                                                   |
| Shennan, Carol                            | Professor of Agrecology                                   | UC Santa Cruz                                                                              | United States of America (the)                             |
| Shennan-Farpón, Yara                      | PhD student Environmental Science                         | University College London                                                                  | United Kingdom of Great Britain and Northern Ireland (the) |
| Shepard, Donald                           | Assistant Professor of Biological Sciences                | Louisiana Tech University                                                                  | United States of America (the)                             |
| Shepherd, Hannah                          | PhD student                                               | Max Planck institute                                                                       | United States of America (the)                             |
| Shepherd, Liz                             | Sustainability                                            | Bangor University                                                                          | United Kingdom of Great Britain and Northern Ireland (the) |
| Shepherd, Harry                           | PhD Student                                               | University of Southampton                                                                  | United Kingdom of Great Britain and Northern Ireland (the) |
| Shepon, Alon                              | environmental sciences and food systems                   | T.H. Chan school of public Health, Harvard University                                      | Israel                                                     |
| Sheppard, Christine S.                    | Ecologist                                                 | University of Hohenheim                                                                    | Germany                                                    |
| Sheppard, Anne                            | Research Associate                                        | University of Warwick                                                                      | United Kingdom of Great Britain and Northern Ireland (the) |
| Sheridan, Katherine                       | Conservation Biology MSc Candidate                        | University of Cape Town                                                                    | South Africa                                               |
| Sheridan, Kate                            | Conservation Biology                                      | Reefscapers                                                                                | United Kingdom of Great Britain and Northern Ireland (the) |
| Sherley, Richard                          | Research Fellow, Environment and Sustainability Institute | University of Exeter                                                                       | United Kingdom of Great Britain and Northern Ireland (the) |
| Sherman, Emma                             | Scientist, Analytical chemistry                           | The New Zealand Institute for Plant & Food Research Limited                                | New Zealand                                                |
| Sherr, Barry                              | Professor emeritus of Microbial Oceanography              | CEOAS- Oregon State University                                                             | United States of America (the)                             |
| Sherr, Evelyn                             | Professor Emeritus, Oceanography                          | Oregon State University                                                                    | United States of America (the)                             |
| Sherren, Kate                             | Associate Professor                                       | Dalhousie University                                                                       | Canada                                                     |
| Sherrow, Hogan                            | Evolutionary Anthropology                                 |                                                                                            | United States of America (the)                             |
| Sherry, Tracey                            | Zoology                                                   |                                                                                            | United States of America (the)                             |
| Sherry, Thomas                            | Professor, Dept. of Ecology and Evolutionary Biology      | Tulane University                                                                          | United States of America (the)                             |
| Sherry, Rebecca                           | Lecturer, Environmental Studies                           | University of Oklahoma                                                                     | United States of America (the)                             |
| Sherwood, Steven                          | Professor, Atmospheric Sciences                           | UNSW Sydney                                                                                | Australia                                                  |
| Sherwood, Orla                            | PhD Student                                               | University College Dublin                                                                  | Ireland                                                    |
| SHERWOOD, ORRIN                           | Professor Emeritus Reproductive Biology                   | University of Illinois                                                                     | United States of America (the)                             |
| Shiel, John                               | PhD(Eng) in adapting Australian houses for climate change | EnviroSustain                                                                              | Australia                                                  |
| Shields, Jimmy                            | Forest Wildlife Management                                | Australian Ecosystems Foundation Inc.                                                      | Australia                                                  |

|                           |                                                                        |                                                                         |                                                            |
|---------------------------|------------------------------------------------------------------------|-------------------------------------------------------------------------|------------------------------------------------------------|
| Shields, Victoria         | PhD student in Chemical and Biological Enigeering                      | University of Sheffield                                                 | United Kingdom of Great Britain and Northern Ireland (the) |
| Shigenaka, Gary           | Senior Marine Biologist                                                | National Oceanic and Atmospheric Administration                         | United States of America (the)                             |
| SHINDLER, BRUCE           | Emeritus Professor                                                     | Oregon State University                                                 | United States of America (the)                             |
| Shinn, Jamie              | Assistant Professor of Geography                                       | West Virginia University                                                | United States of America (the)                             |
| Shirai, Leila             | post-doc Biology                                                       | Unicamp                                                                 | Brazil                                                     |
| Shmaefsky, Brian          | Professor of Environmental Science                                     | Lone Star College - Kingwood                                            | United States of America (the)                             |
| Shoham, Jacob             | Professor emeritus of Life Sciences                                    | Bar Ilan University                                                     | Israel                                                     |
| Shohami, David            | PhD candidate, Ecology, Evolution and Behavior                         | The Hebrew University of Jerusalem                                      | Israel                                                     |
| Sholto Douglas, Deirdre   | Researcher/microbiologist                                              | Illinois Institute of Technology                                        | United States of America (the)                             |
| Short, Michael            | Senior Research Fellow                                                 | University of South Australia                                           | Australia                                                  |
| Short, Timothy            | Associate Professor of Biology, Plant Physiology and Molecular Biology | Queens College of the City University of New York                       | United States of America (the)                             |
| Shrader, Adrian           | Associate Professor Mammalian Behavioural Ecology                      | University of Pretoria                                                  | South Africa                                               |
| Shrum, Trisha             | Assistant Professor of Community Development & Applied Economics       | University of Vermont                                                   | United States of America (the)                             |
| Shumka, Spase             | Biologist                                                              | Agricultural University of Tirana                                       | Albania                                                    |
| Shumway, Nicole           | Conservation Biologist                                                 | The University of Queensland                                            | Australia                                                  |
| Shumway, Caroly           | Director                                                               | Center for Behavior and Climate                                         | United States of America (the)                             |
| Shutler, Jamie            | Associate professor in Earth observation                               | University of Exeter                                                    | United Kingdom of Great Britain and Northern Ireland (the) |
| Shuttleworth, Adam        | Ecological Researcher                                                  | University of KwaZulu-Natal                                             | South Africa                                               |
| Siani, Sacha              | PhD Student in Geography                                               | Indiana University                                                      | United States of America (the)                             |
| Sibeaux, Adelaide         | PhD                                                                    | Deakin University - Center for Integrative Ecology                      | Australia                                                  |
| Sibik, Jozef              | Senior Researcher/Vegetation Scientist                                 | Plant Science and Biodiversity Center, Slovak Academy of Sciences       | Slovakia                                                   |
| Šibíková, Mária           | Senior researcher/geobotany, forest ecology                            | Plant Science and Biodiversity Center, Slovak Academy of Sciences       | Slovakia                                                   |
| Sibille, Brigitte         | PhD                                                                    | University of Nice                                                      | France                                                     |
| sibly, frank              | Consultant Orthopaedic Surgeon                                         | Wye Valley NHS trust                                                    | United Kingdom of Great Britain and Northern Ireland (the) |
| Sibly, Richard            | Ecology Professor                                                      | University of Reading                                                   | United Kingdom of Great Britain and Northern Ireland (the) |
| Sibret, Thomas            | Researcher                                                             | Ghent University                                                        | Belgium                                                    |
| SICARD, Jean-Charles      | Senior scientist - bio statistics - data processing                    | CIRAD                                                                   | France                                                     |
| Siddaramappa, Shivakumara | Faculty Scientist                                                      | Institute of Bioinformatics and Applied Biotechnology                   | India                                                      |
| Siddens, Lisbeth K.       | Environmental Toxicology                                               | Oregon State University                                                 | United States of America (the)                             |
| Siddique, Ilyas           | Adjunct Professor                                                      | Department of Crop Science, Federal University of Santa Catarina (UFSC) | Brazil                                                     |
| SIE, Marion               | Life Cycle Analyst                                                     | VERSo                                                                   | France                                                     |
| Sié, Pierre               | Professor emeritus (Haematology)                                       | University Paul Sabatier                                                | France                                                     |

|                                |                                                  |                                                                                 |                                                            |
|--------------------------------|--------------------------------------------------|---------------------------------------------------------------------------------|------------------------------------------------------------|
| Siebert, Julia                 |                                                  | German Centre for Integrative Biodiversity Research (iDiv) Halle-Jena-Leipzig   | Germany                                                    |
| Siedle, Christoph              | Senior engineer Power Electronics for Renewables | Fraunhofer ISE                                                                  | Germany                                                    |
| Siedlecki, Igor                | biology                                          | Faculty of Biology University of Warsaw                                         | Poland                                                     |
| Siefferman, Lynn               | Professor of Biology                             | Appalachian State University                                                    | United States of America (the)                             |
| Siegel, Lori                   | Senior Modeler                                   | Climate Interactive                                                             | United States of America (the)                             |
| Siegel, Kristen                | Graduate Student                                 | Queen' s University                                                             | Canada                                                     |
| Siegel, Kyle                   | Organismal biology                               | Northwestern University                                                         | United States of America (the)                             |
| Siegert, Thomas                | Astrophysicist                                   | Center for Astrophysics and Space Sciences, University of California, San Diego | United States of America (the)                             |
| Sielaff, Hendrik               | Postdoc, Biophysics                              | National University of Singapore                                                | Singapore                                                  |
| Siemer, Niklas                 | Software developer, computational chemist        | Max-Planck-Institut für Eisenforschung GmbH                                     | Germany                                                    |
| Sieracki, Paul                 | Geospatial Analyst/Wildlife Biologist            | Retired Consultant                                                              | United States of America (the)                             |
| Sierka, Edyta                  | Dr hab. biology/ environmental protection        | University of Silesia in Katowice                                               | Poland                                                     |
| Sierra-de-Grado, Rosario       | Profesor/ Forest genetics                        | Universidad de Valladolid                                                       | Spain                                                      |
| Sieverts, Eric                 | Physicist                                        | retired                                                                         | Netherlands (the)                                          |
| Siewerding Meirelles, Gabriela | PhD student                                      | Lancaster University                                                            | United Kingdom of Great Britain and Northern Ireland (the) |
| Sigala, Jorge                  | Evolutionary Ecology and Climate Change          | National Institute of Ecology and Climate Change                                | Mexico                                                     |
| Sigg, Laura                    | Professor in aquatic chemistry (emerita)         | Eawag, Swiss Federal Institute of Aquatic Science and Technology                | Switzerland                                                |
| Sigmund, Gabriel               | Assistant Professor                              | Wageningen University and Research - Environmental Technology                   | Netherlands (the)                                          |
| SIGURA, MAURIZIA               | RESEARCHER, AGRICULTURAL ENGINEERING             | UNIVERSITY OF UDINE                                                             | Italy                                                      |
| Sigurdsson, Oddur              | Geologist/Glaciologist                           | Icelandic Meteorological Office                                                 | Iceland                                                    |
| Šigut, Ladislav                | Postdoc - Biogeochemistry                        | Global Change Research Institute Czech Academy of Sciences                      | Czech Republic (the)                                       |
| Sikes, Benjamin                | Associate Scientist/Professor                    | University of Kansas                                                            | United States of America (the)                             |
| Silantjeva, Olga               | Postdoctor                                       | Universitet i Oslo                                                              | Norway                                                     |
| Silberberger, Marc             | Marine Ecology                                   | The Institute of Oceanology of the Polish Academy of Sciences (IO PAN)          | Poland                                                     |
| Siles, Jose A.                 | Postdoc on Soil Microbial Ecology                | University of California, Berkeley                                              | United States of America (the)                             |
| Silingardi, Helena Maura       | Professor Doctor                                 | Universidade Federal de Uberlândia, Brazil                                      | Brazil                                                     |
| Siljander, Pia                 | Biosciences                                      | University of Helsinki                                                          | Finland                                                    |
| Silk, Matthew                  | Postdoctoral Researcher, Ecology                 | University of Exeter                                                            | United Kingdom of Great Britain and Northern Ireland (the) |
| Silla Cortés, Fernando         | Assitant Professor                               | University of Salamanca                                                         | Spain                                                      |
| Sillam-Dussès, David           |                                                  | University Paris 13                                                             | France                                                     |
| Sillero, Neftalí               | Principal Researcher                             | CICGE - Faculty of Science - University of Porto                                | Portugal                                                   |
| Sills, Erin                    | Professor                                        | North Carolina State University                                                 | United States of America (the)                             |
| Silova, Iveta                  | Education Policy                                 | Arizona State University                                                        | United States of America (the)                             |
| Silva, Heron                   | Professor                                        | Federal University of São Paulo                                                 | Brazil                                                     |

|                                    |                                                                    |                                                                                                                                                              |                                                            |
|------------------------------------|--------------------------------------------------------------------|--------------------------------------------------------------------------------------------------------------------------------------------------------------|------------------------------------------------------------|
| Silva, Diana                       | Arachnologist/taxonomy, biogeography and biodiversity conservation | Natural History Museum, UNMSM                                                                                                                                | Peru                                                       |
| Silva, Otávio                      | Post-doctoral researcher                                           | Instituto de Botânica                                                                                                                                        | Brazil                                                     |
| Silva, Sofia                       | PhD student                                                        | Durham University                                                                                                                                            | United Kingdom of Great Britain and Northern Ireland (the) |
| Silva, João Gabriel                | Full Professor                                                     | University of Coimbra                                                                                                                                        | Portugal                                                   |
| Silva, Miguel                      | Political Economy                                                  |                                                                                                                                                              | Brazil                                                     |
| Silva, André                       | Doctoral student                                                   | Uppsala University                                                                                                                                           | Sweden                                                     |
| Silva, Luiz                        | Professor in Agricultural Sciences                                 | Universidade Federal de Feira de Santana                                                                                                                     | Brazil                                                     |
| Silva, Bruna                       | master's student                                                   | Federal University of Santa Catarina                                                                                                                         | Brazil                                                     |
| Silva, Monalisa                    | PhD Ecology                                                        | UFRN                                                                                                                                                         | Brazil                                                     |
| Silva, Thiago                      | Lecturer                                                           | Biological and Environmental Sciences, University of Stirling                                                                                                | United Kingdom of Great Britain and Northern Ireland (the) |
| Silva, José                        | PhD Student in Astrophysics                                        | Institute of Astrophysics and Space Sciences                                                                                                                 | Portugal                                                   |
| Silva, Priscilla Caroline          | Taxonomy                                                           | Universidade Federal de Viçosa                                                                                                                               | Brazil                                                     |
| Silva, Teresa Luísa                | External colaborator                                               | InBIO Laboratório Associado, CIBIO, Centro de Investigação em Biodiversidade e Recursos Genéticos, Universidade do Porto, Campus de Vairão, Vairão, Portugal | Portugal                                                   |
| Silva, Suelma                      | Plant Ecology                                                      | Cerrado Biodiversity Assessment, Research and Conservation Center                                                                                            | Brazil                                                     |
| Silva, Flávio                      | Assistant Researcher - Environmental Engineering                   | University of Aveiro, Centre for Environmental and Marine Studies (CESAM)                                                                                    | Portugal                                                   |
| Silva, Mariana Elizabeth           | Biologist                                                          | University of Buenos Aires                                                                                                                                   | Argentina                                                  |
| Silva, Sofia Marques               | Post-Doc Researcher                                                | Research Center in Biodiversity and Genetic Resources, CIBIO/InBIO                                                                                           | Portugal                                                   |
| Silva, Guilherme                   | Biologist                                                          | Campinas State University                                                                                                                                    | Brazil                                                     |
| Silva Junior, Celso Henrique Leite | PhD Candidate                                                      | National Institute for Space Research (INPE)                                                                                                                 | Brazil                                                     |
| Silva Macher, Jose Carlos          | Ecological economist                                               | Pontificia Universidad Católica del Perú                                                                                                                     | Peru                                                       |
| Silva-Dávila, Diana                | Tenured Professor and Researcher/Biological Sciences               | Universidad Nacional Mayor de San Marcos                                                                                                                     | Peru                                                       |
| Silva-Morales, Elysa               | Restoration Ecologist                                              | Universidad de Alicante                                                                                                                                      | Spain                                                      |
| Silvano, Renato                    | Associate Professor/Ecology                                        | Universidade Federal do Rio Grande do Sul                                                                                                                    | Brazil                                                     |
| Silveira, Marcos                   | Full Professor                                                     | Federal University of Acre                                                                                                                                   | Brazil                                                     |
| Silveira, Fernando                 | Professor of Plant Ecology                                         | Federal university of Minas Gerais                                                                                                                           | Brazil                                                     |
| Silveira, Luís                     | Masters Student of Biodiversity, Genetics and Evolution            | CIBIO                                                                                                                                                        | Portugal                                                   |
| Silvério, Natália                  |                                                                    | Research at Observatory of Protected Areas. Federal University of Santa Catarina                                                                             | Brazil                                                     |
| Silvis, Starr                      | Professor Environmental Engineering                                |                                                                                                                                                              | United States of America (the)                             |
| Silvy, Yona                        | PhD student                                                        | LOCEAN/IPSL, Sorbonne Université                                                                                                                             | France                                                     |
| Sim, Texa                          | PhD Researcher in Marine Ecology                                   | Scottish Association for Marine Science                                                                                                                      | United Kingdom of Great Britain and Northern Ireland (the) |
| SIMA, Adriana                      | Research Engineer, climate modeling                                | CNRS                                                                                                                                                         | France                                                     |

|                                  |                                                                                                       |                                                           |                                                            |
|----------------------------------|-------------------------------------------------------------------------------------------------------|-----------------------------------------------------------|------------------------------------------------------------|
| Simba, Lavhelesani Dembe         | Postdoctoral research fellow                                                                          | African Conservation Centre, Nelson Mandela University    | South Africa                                               |
| Sime, Karen                      | Professor                                                                                             | SUNY Oswego                                               | United States of America (the)                             |
| Simelane, Phumlile               | Research Coordinator                                                                                  | All Out Africa                                            | Swaziland                                                  |
| Simelton, Elisabeth              | Climate change scientist                                                                              | World Agroforestry (ICRAF)                                | Viet Nam                                                   |
| Simeone, Pierre                  | MD, PhD                                                                                               | Aix-Marseille University                                  | France                                                     |
| Simeonov, Todor                  | Curator, philosophy                                                                                   | Changing World Foundation                                 | Hungary                                                    |
| Simioni, Guillaume               | Research scientist, Ecology                                                                           | INRA                                                      | France                                                     |
| Simkanin, Christina              | Research Ecologist                                                                                    | Smithsonian Institution                                   | United States of America (the)                             |
| Šimko, Jakub                     | Computer science                                                                                      | Slovak University of Technology in Bratislava             | Slovakia                                                   |
| Simmer, Clemens                  | university professor, meteorology                                                                     | University Bonn                                           | Germany                                                    |
| Simmons, Amie                    | Research Program Coordinator                                                                          | Oklahoma Medical Research Foundation                      | United States of America (the)                             |
| Simmons, Tuesday                 | PhD candidate, Microbiology                                                                           | UC Berkeley                                               | United States of America (the)                             |
| Simoes, Marianna                 | PostDoc                                                                                               | Senckenberg Research Institute and Natural History Museum | Germany                                                    |
| Simões, Marta Filipa             | Assistant Professor, Astromycology                                                                    | Macao University of Science and Technology                | Macao                                                      |
| Simões de Castro, Luiz Alexandre | PhD candidate                                                                                         | São Paulo State University                                | Brazil                                                     |
| Simões Santos Leal, Bárbara      | Postdoc researcher in Plant Biology                                                                   | UNICAMP                                                   | Brazil                                                     |
| Simões VITULE, JEAN RICARDO      | Professor of Ecology                                                                                  | Federal University of Parana                              | Brazil                                                     |
| Simon, Carine                    | Researcher in marine science                                                                          | Instituto de Ciencias Marinas, CSIC                       | Spain                                                      |
| Simon, Rüdiger                   | Professor for Biology                                                                                 | Heinrich Heine University Düsseldorf                      | Germany                                                    |
| Simon, Laurence                  | Professor of International Development and Director, Center for Global Development and Sustainability | Brandeis University                                       | United States of America (the)                             |
| Simon, Stephen J.                | PhD, Chemistry, retired                                                                               | Consultant/ Independent                                   | United States of America (the)                             |
| Simon, Monique                   | Post-doctoral researcher/Evolutionary Biology                                                         | Universidade de Sao Paulo                                 | Brazil                                                     |
| Simon, Judy                      | Plant Ecophysiology                                                                                   | University of Konstanz                                    | Germany                                                    |
| Simon, Jean-Christophe           | Directeur de recherche                                                                                | Institut National de la Recherche Agronomique             | France                                                     |
| Simon, Alexis                    | PhD student, Evolutionary Biology                                                                     | ISEM, Univ Montpellier, CNRS, EPHE, IRD                   | France                                                     |
| Simon, Ondrej Prokop             | hydrobiologist                                                                                        | Czech University of Life Sciences Prague                  | Czech Republic (the)                                       |
| Simon, Amelie                    | Postdoctoral fellow                                                                                   | CNRS                                                      | France                                                     |
| Simoncelli, Stefano              | Research scientist                                                                                    | IGB Berlin                                                | Germany                                                    |
| Simoncic, Valentin               | student in health geography                                                                           | IRD                                                       | France                                                     |
| Simonet, Virginie                | senior scientist in Physics                                                                           | Institut Néel, CNRS                                       | France                                                     |
| Simonet, Camille                 | PhD evolutionary microbiology and medicine                                                            | University of Edinburgh                                   | United Kingdom of Great Britain and Northern Ireland (the) |
| SIMONET, Guillaume               | Independant Researcher on Adaptation to Climate Change - Environmental Sciences                       | Abstraction Services                                      | France                                                     |
| Simonin, Marie                   | Postdoctoral Associate                                                                                | IRD, IPME, Montpellier                                    | France                                                     |
| Simonini, Roberto                | Associate Professor of Ecology                                                                        | University of Modena and Reggio Emilia                    | Italy                                                      |
| Simonneaux, Vincent              | Remote Sensing of agriculture and water resources                                                     | IRD                                                       | France                                                     |
| Simonyi, Gyula Istvan            | President. Economist, mathematician.                                                                  | BOCS Foundation                                           | Hungary                                                    |

|                              |                                                                         |                                                              |                                                            |
|------------------------------|-------------------------------------------------------------------------|--------------------------------------------------------------|------------------------------------------------------------|
| Simpson, Robert              | Soil Biochemist                                                         | The New Zealand Institute for Plant and Food Research        | New Zealand                                                |
| Simpson, Juliet              | Coastal Ecologist                                                       | Massachusetts Institute of Technology                        | United States of America (the)                             |
| Simpson, Gregory             | Lecturer, Veterinary Science                                            | University of Pretoria                                       | South Africa                                               |
| Simpson, Victoria            | PhD candidate, Psychology                                               | Lancaster University                                         | United Kingdom of Great Britain and Northern Ireland (the) |
| Simpson, Dr Nicholas         | Postdoctoral Research Fellow: Africa Climate and Development Initiative | University of Cape Town                                      | South Africa                                               |
| Simpson, Brent               | Senior Natural Resources Management Officer                             | Food and Agriculture Organization of the United Nations      | Italy                                                      |
| Sinaga, Hans                 | Head of Sub Directorate                                                 | Ministry of Environment and Forestry                         | Indonesia                                                  |
| Sinclair, Brent              | Professor of Biology                                                    | Western University                                           | Canada                                                     |
| Sinclair, Amanda             | PhD Candidate                                                           | RMIT Univeristy                                              | Australia                                                  |
| Sinderson, Elias             | Retired, Computer Science                                               | UCSC / NASA                                                  | United States of America (the)                             |
| Sindičić, Magda              | Assistant professor                                                     | Faculty of Veterinary Medicine University of Zagreb          | Croatia                                                    |
| Singels, Abraham             | Principal Agronomist                                                    | South African Sugarcane Research Institute                   | South Africa                                               |
| Singer, Gabriel              | Senior Scientist, Freshwater Ecology                                    | Leibniz-Institute of Freshwater Ecology and Inland Fisheries | Germany                                                    |
| Singer, Michael S.           | Professor of Biology and Environmental Studies                          | Wesleyan University                                          | United States of America (the)                             |
| Singh, Jyotsana              | Junior Research Fellow                                                  | National Centre for Cell Science                             | India                                                      |
| Singh, Gajendra              | Ph.D Scholar                                                            | Guru Gobind Singh Indraprastha University                    | India                                                      |
| Singh, Tanya                 | Researcher climate change and health                                    | Wageningen UR - Wageningen Environmental Research            | Netherlands (the)                                          |
| Singh, Harinder Rai          | Marine & Coastal Ecology                                                | MARA University of Technology (UiTM)                         | Malaysia                                                   |
| Singh, Baljinder             | Marine Biology & Molecular Medicine & Public Health                     |                                                              | Canada                                                     |
| Singh, Gajendra              | Nature Education Officer                                                | Give Me Trees Trust                                          | India                                                      |
| SINGH, HARINDER RAI          | ACADEMIC/MARINE ECOLOGY-BIOLOGY                                         | MARA UNIVERSITY OF TECHNOLOGY                                | Malaysia                                                   |
| Siniscalco, Consolata        | Professor in Plant Ecology                                              | University of Turin                                          | Italy                                                      |
| Sinkakarimi, Mohammad Hosein | Research Center for the Caspian Region                                  | University of Mazandaran                                     | Iran (Islamic Republic of)                                 |
| Sinnadurai, Paul             | Natural Resources Manager                                               | Brecon Beacons National Park Authority                       | United Kingdom of Great Britain and Northern Ireland (the) |
| Sinnesael, Arne              | PhD student                                                             | KU Leuven                                                    | Belgium                                                    |
| sintim, Henry                | Soil Fertility Specialist                                               | University of Georgia                                        | United States of America (the)                             |
| Sion, Letizia                | Researcher in Ecology                                                   | Department of Biology_University of Bari Aldo Moro           | Italy                                                      |
| Siqueira, Felipe             | Professor                                                               | Universidade Federal do Sul e Sudeste do Pará                | Brazil                                                     |
| Siqueira-Gay, Juliana        | Ph.D. Candidate/Environmental Sciencies                                 | University of São Paulo                                      | Brazil                                                     |
| Sirami, Clelia               | Researcher in ecology                                                   | INRA                                                         | France                                                     |
| Sire, Lucas                  | Ph.D student                                                            | Institut de Recherche sur la Biologie de l’Insecte           | France                                                     |
| Siregar, R.S.E.              | Researcher                                                              | Research Center for Climate Change                           | Indonesia                                                  |
| Siregar, Rondang             | Research Associate                                                      | Research Center for Climate Change-University of Indonesia   | Indonesia                                                  |
| Sirén, Anders                | Adjunct professor of geography                                          | University of Turku                                          | Finland                                                    |

|                                 |                                                                       |                                                                   |                                                            |
|---------------------------------|-----------------------------------------------------------------------|-------------------------------------------------------------------|------------------------------------------------------------|
| Siriwardana, Chamindika         |                                                                       | University of North Carolina Wilmington                           | United States of America (the)                             |
| Siriwardane-de Zoysa, Dr. Rapti | Postdoctoral researcher, Marine Anthropology                          | Leibniz Center for Tropical Marine Research                       | Germany                                                    |
| Sischo, David                   | Wildlife Biologist                                                    | Hawaii Department of Land and Natural Resources                   | United States of America (the)                             |
| Sissokho, Papa                  | Mathematics                                                           | Illinois State University                                         | United States of America (the)                             |
| Sist, Plinio                    | Director of Forests&Societies research unit at Cirad/Forest Scientist | Cirad                                                             | France                                                     |
| Sitas, Nadia                    | Senior researcher in sustainability science                           | Centre for Complex Systems in Transition, Stellenbosch University | South Africa                                               |
| Siuda, Waldemar                 | Associate professor                                                   | University of Warsaw, Faculty of Biology                          | Poland                                                     |
| Sivan, Orit                     | Prof. in Environmental Sciences                                       | Ben Gurion University of the Negev                                | Israel                                                     |
| Six, Diana                      | Professor of Forest Entomology and Ecology                            | University of Montana                                             | United States of America (the)                             |
| Sixt, Christina                 | PhD Student                                                           | Hochschule Geisenheim University, Department of Applied Ecology   | Germany                                                    |
| Sjodin, Anna                    | Post doctoral researcher - Ecology, Biology, Genetics, Math           | University of Idaho                                               | United States of America (the)                             |
| Sjödín, Per                     | researcher                                                            | Uppsala University                                                | Sweden                                                     |
| Sjöqvist, Conny                 | Postdoc                                                               | Åbo Akademi University                                            | Finland                                                    |
| Skamantzouras, Apostolis        | Physicist                                                             | National and Kapodistrian University of Athens                    | Greece                                                     |
| Skewes, Timothy                 | Marine ecologist                                                      | CSIRO                                                             | Australia                                                  |
| Skiffington, Janice             | Research Coordinator                                                  | University of Calgary                                             | Canada                                                     |
| Skillman, John                  | Professor of Environmental Biology                                    | California State University                                       | United States of America (the)                             |
| Skinner, PhD, William           | Reproductive Biologist                                                | Male Contraceptive Initiative                                     | United States of America (the)                             |
| Sklair, Leslie                  | EMERITUS PROFESSOR OF SOCIOLOGY                                       | LONDON SCHOOL OF ECONOMICS                                        | United Kingdom of Great Britain and Northern Ireland (the) |
| Skok, John                      | Planetary Science                                                     | SETI Institute                                                    | United States of America (the)                             |
| Sköld, Helen                    | marine biology                                                        | University of Gothenburgh                                         | Sweden                                                     |
| Skoog, Steven                   | Chemist                                                               | Denka Performance Elastomer                                       | United States of America (the)                             |
| Skoracka, Anna                  | Associate Professor in Ecology                                        | Adam Mickiewicz University in Poznań                              | Poland                                                     |
| Skorupa, Agnieszka              | Psychologist                                                          | University of Silesia                                             | Poland                                                     |
| Skoulikidis, Nikolaos           | Research Director                                                     | Hellenic Center for Marine Research                               | Greece                                                     |
| Skovshoved, Rasmus Iversen      | Civil & Environmental Engineering                                     | Technical University of Denmark                                   | Denmark                                                    |
| Skowronek, Sandra               | Researcher / Ecology                                                  | German Federal Agency for Nature Conservation                     | Germany                                                    |
| Skubała, Piotr                  | Professor, soil ecologist                                             | University of Silesia in Katowice                                 | Poland                                                     |
| Skubała, Kaja                   | Assistant professor, biology                                          | Jagiellonian University                                           | Poland                                                     |
| Skwark, Marcin J.               | Research Associate                                                    | University of Cambridge                                           | United Kingdom of Great Britain and Northern Ireland (the) |
| Skwierawski, Andrzej            | Assistant Professor                                                   | University of Warmia and Mazury in Olsztyn                        | Poland                                                     |
| Slack, Megan                    | Graduate Research Assistant                                           | University of Kentucky                                            | United States of America (the)                             |
| Slack, Jay                      | Pharmacology                                                          |                                                                   | United States of America (the)                             |
| Slaney, Larissa                 | Conservation Biologist; PhD (Life Sciences) researcher                | Heriot-Watt University                                            | United Kingdom of Great Britain and Northern Ireland (the) |

|                    |                                                 |                                                                         |                                                            |
|--------------------|-------------------------------------------------|-------------------------------------------------------------------------|------------------------------------------------------------|
| Slater, Nigel      | Professor of Chemical Engineering               | University of Cambridge                                                 | United Kingdom of Great Britain and Northern Ireland (the) |
| Slater, Peter      | Emeritus Kennedy Professor of Natural History   | University of St Andrews                                                | United Kingdom of Great Britain and Northern Ireland (the) |
| Slaus, ivo         | professor emeritus, physics                     | R. Boskovic Institute and World Academy of Art and Science              | Croatia                                                    |
| Slavík, Ondřej     | Zoology                                         | Česká zemědělská univerzita v Praze                                     | Czech Republic (the)                                       |
| SLIMANI, Tahar     | Professor of Biology                            | Cadi Ayyad University                                                   | Morocco                                                    |
| Slingsby, Jasper   | Honorary Research Associate                     | University of Cape Town                                                 | South Africa                                               |
| Sloan, Terry       | Emeritus Professor of Physics, Particle Physics | Lancaster University                                                    | United Kingdom of Great Britain and Northern Ireland (the) |
| Slugovc, Christian | Prof. / Chemistry                               | Graz University of Technology                                           | Austria                                                    |
| Smale, Malcolm     | Marine Biologist                                | BCRE                                                                    | South Africa                                               |
| Smart, Michael     | Zoology                                         | Colorado state university                                               | United States of America (the)                             |
| Smart, Barry       | Professor of Sociology                          | University of Portsmouth                                                | United Kingdom of Great Britain and Northern Ireland (the) |
| Smetacek, Victor   | Professor Emeritus BioOceanography              | Alfred Wegener Institute Helmholtz Centre for Polar and Marine Research | Germany                                                    |
| Smeulders, Marjan  | Researcher                                      | Radboud University                                                      | Netherlands (the)                                          |
| Smid, Marek        |                                                 | BC3                                                                     | Czech Republic (the)                                       |
| smidt, marten      | professor molecular neuroscience                | UVA/SILS                                                                | Netherlands (the)                                          |
| Smirnova, Angela   | Research Associate                              | University of Calgary, Dept. of Biological Sciences                     | Canada                                                     |
| Smiseth, Per       | Reader in Animal Behaviour                      | University of Edinburgh                                                 | United Kingdom of Great Britain and Northern Ireland (the) |
| Smit, Michiel      | Crop physiologist                               | Edamame Development Program                                             | South Africa                                               |
| Smit, Sophie       | PhD student cognitive science                   | Macquarie University                                                    | Australia                                                  |
| Smith, Neil        | (retired) Research Associate - Astrophysics     | The University of Adelaide                                              | Australia                                                  |
| Smith, Raymond     | Prof Emeritus - Marine Ecology                  | University of California Santa Barbara                                  | United States of America (the)                             |
| Smith, Winston     | Principal Research Scientist                    | Institute of Arctic Biology, University of Alaska-Fairbanks             | United States of America (the)                             |
| Smith, Katie       | Post-Doctoral Researcher                        | UC Davis                                                                | United States of America (the)                             |
| Smith, Jonathan    | Scientific Software Engineer                    | Francis Crick Institute                                                 | United Kingdom of Great Britain and Northern Ireland (the) |
| Smith, Bradley     | Senior Lecturer in Psychology                   | Central Queensland University                                           | Australia                                                  |
| Smith, Rachael     | PhD Student in Renewable Energy Engineering     |                                                                         | United Kingdom of Great Britain and Northern Ireland (the) |
| Smith, Marilyn     | Senior Scientist                                | Retired-KU Medical Center; Viracor-Eurofins                             | United States of America (the)                             |
| Smith, Tyler       | Associate Professor of Marine Biology           | University of the Virgin Islands                                        | Virgin Islands (U.S.)                                      |
| Smith, Ward        | Physical Scientist                              |                                                                         | Canada                                                     |
| Smith, Graham      | Lead Scientist / Ecology                        | APHA                                                                    | United Kingdom of Great Britain and Northern Ireland (the) |
| Smith, Steve       | Head of Ecological Genetics                     | University of Veterinary Medicine, Vienna                               | Austria                                                    |
| Smith, James       | Marine Research Scientist                       | University of California, Santa Cruz                                    | United States of America (the)                             |



|                           |                                                                               |                                                                       |                                                            |
|---------------------------|-------------------------------------------------------------------------------|-----------------------------------------------------------------------|------------------------------------------------------------|
| Smith, Pete               | Professor of Soils & Global Change                                            | University of Aberdeen                                                | United Kingdom of Great Britain and Northern Ireland (the) |
| Smith, Sarah              | Biological sciences                                                           | Industry                                                              | United Kingdom of Great Britain and Northern Ireland (the) |
| Smith, L David            | Professor, Biological Sciences                                                | Smith College                                                         | United States of America (the)                             |
| Smith, Darvin Scott       | Physician / Human Biology Department                                          | Stanford University                                                   | United States of America (the)                             |
| Smith, W. Douglas         | Environmental Scientist                                                       | U.S. Environmental Protection Agency                                  | United States of America (the)                             |
| Smith, R. Darrell         | Wetland Ecologist                                                             | Global Environmental Relief                                           | United States of America (the)                             |
| Smith, Lowell             | physicist, retired US Climate Change Research Program agency program director | retired, US Environmental Protection Agency                           | United States of America (the)                             |
| Smith, Joshua             | Wildlife Research Biologist                                                   | Oregon Department of Fish and Wildlife                                | United States of America (the)                             |
| Smith, Judy               | Ecological Consultant                                                         | P & J Smith Ecological Consultants                                    | Australia                                                  |
| Smith, Peter              | Consultant ecologist - wildlife and vegetation                                | P & J Smith Ecological Consultants                                    | Australia                                                  |
| Smith, Abigail            | Professor of Marine Science                                                   | University of Otago                                                   | New Zealand                                                |
| Smith, Ceal               | Research & Policy Analyst                                                     | Alaska Institute for Climate & Energy                                 | United States of America (the)                             |
| Smith, Glen               | Postdoctoral researcher, climate change adaptation.                           | University College Cork, UCC                                          | Ireland                                                    |
| Smith, Lisa               | Master of Science degree. Registered Nurse. Scientist.                        | Kingston Health Sciences Centre                                       | Canada                                                     |
| Smith, Felix              | Public trust fish and wildlife management                                     | Retired                                                               | United States of America (the)                             |
| Smith, Bob                | PhD. Biomedical Sciences                                                      | University of Toronto                                                 | Canada                                                     |
| SMITH, PETER              | Retired Head of Science                                                       | Bexhill College                                                       | United Kingdom of Great Britain and Northern Ireland (the) |
| Smith-Mannschott, Katrina | Ph.D. Student                                                                 | ETH Zurich                                                            | Switzerland                                                |
| Smithers, Richard J.      | Associate Director                                                            | Ricardo Energy & Environment                                          | United Kingdom of Great Britain and Northern Ireland (the) |
| Smoak, Copley             | Biology                                                                       | Conservancy of SW Florida                                             | United States of America (the)                             |
| Smol, John                | Distinguished University Professor                                            | Queen' s University                                                   | Canada                                                     |
| Smoot, James              | Microbiology                                                                  |                                                                       | United States of America (the)                             |
| Smyth, William            | professor of oceanography                                                     | Oregon State University                                               | United States of America (the)                             |
| Snaddon, Kate             | Freshwater ecologist                                                          | Freshwater Research Centre                                            | South Africa                                               |
| Snell, Rebecca            | Assistant Professor of Plant Ecology                                          | Ohio University                                                       | United States of America (the)                             |
| Snell, Katherine          | Post-doctoral Researcher, Macroecology                                        | CMEC                                                                  | Denmark                                                    |
| Snyder, Dr. Jeff          | Assistant Professor of Biology/Ecology                                        | Western Oregon University                                             | United States of America (the)                             |
| Snyers, Luc               | Ass. Prof.                                                                    | Medical University of Vienna                                          | Austria                                                    |
| Soares, Marcelo           | Associate Professor                                                           | Instituto de Ciências do Mar (LABOMAR), Universidade Federal do Ceará | Brazil                                                     |
| Soares, Matheus           | Biologist                                                                     | UFMG                                                                  | Brazil                                                     |
| Soares, Adilson           | Full professor, energy resources, geology, GIS                                | Universidade Federal de São Paulo                                     | Brazil                                                     |
| Soares, Maria             | Post-doc                                                                      |                                                                       | Portugal                                                   |
| Sobek, Sebastian          | Associate Professor, Limnology                                                | Uppsala University                                                    | Sweden                                                     |
| Sobel, Adam               | Professor, Atmospheric Science                                                | Columbia University                                                   | United States of America (the)                             |
| Söber, Virve              | Researcher in Ecology                                                         | University of Tartu                                                   | Estonia                                                    |
| Sobiech-Wolf, Jennifer    | Climate Scientist / Landscape Ecologist                                       | University of Münster (WWU)                                           | Germany                                                    |

|                                   |                                                                 |                                                                 |                                                            |
|-----------------------------------|-----------------------------------------------------------------|-----------------------------------------------------------------|------------------------------------------------------------|
| Sobieski, Rodney                  | Microbiology                                                    | Emporia state university                                        | United States of America (the)                             |
| Sobol, Agnieszka                  | assistant professor, Faculty of Economics                       | University of Economics in Katowice                             | Poland                                                     |
| Šobotník, Jan                     | Professor of tropical entomology                                | Czech University of Life Sciences                               | Czech Republic (the)                                       |
| Sobotta, Andre                    | environmental physics                                           | Federal highway institute                                       | Germany                                                    |
| Sobral, Mar                       | Ecologist                                                       | University of Santiago de Compostela                            | Spain                                                      |
| Sobrinho, José A.                 | Professor Earth Physics/Remote Sensing                          | University of Valencia                                          | Spain                                                      |
| SOBRINO CASTELLO, FRANCISCO       | RESEARCH PROFESOR/VIROLOGY                                      | SPANISH RESEARCH COUNCIL                                        | Spain                                                      |
| Soccodato, Alice                  | Researcher                                                      | Cnes                                                            | France                                                     |
| Söderholm, Annika                 | Postdoctoral researcher in Structural biology                   | Uppsala University                                              | Sweden                                                     |
| Söderlund Kanarp, Christoffer     | Ph.D. Student in Environmental Communication                    | Swedish University of Agricultural Sciences                     | Sweden                                                     |
| Sodré, Elder de Oliveira          | PhD in Ecology                                                  | UFRJ                                                            | Brazil                                                     |
| Soen, Jonathan                    | R&D Engineer, PhD (control systems)                             | Thales Avionics                                                 | France                                                     |
| Soens, Tim                        | University Professor                                            | University of Antwerp                                           | Belgium                                                    |
| Sogbohossou, Deedi                |                                                                 | University of Abomey-Calavi, Benin                              | Benin                                                      |
| Sogbohossou, Etotepe              | Associate Professor                                             | University of Abomey-Calavi                                     | Benin                                                      |
| Soinne, Helena                    | Senior Scientist / Soil Science                                 | Natural Resources Institute Finland                             | Finland                                                    |
| Soja, Constance M                 | Professor of Geology, Emerita                                   | Colgate University                                              | United States of America (the)                             |
| Sojamo, Suvi                      | Post-Doctoral Fellow, water resources management and governance | Aalto University                                                | Finland                                                    |
| Sokolov, Nina                     | PhD student                                                     | UC Berkeley                                                     | United States of America (the)                             |
| Sokolove, Phillip                 | Professor of Biological Sciences, Retired                       | University of Maryland, Baltimore County                        | United States of America (the)                             |
| Sokołowska-Mikołajczyk, Mirosława | Professor / Ichthyobiology                                      | University of Agriculture in Krakow                             | Poland                                                     |
| Solan, Martin                     | Professor                                                       | University of Southampton                                       | United Kingdom of Great Britain and Northern Ireland (the) |
| Solar, Ricardo                    | Professor of Ecology                                            | Universidade Federal de Minas Gerais                            | Brazil                                                     |
| Soldado-Magraner, Saray           | Postdoctoral Researcher                                         | Institute of Neuroinformatics, ETH-UZH Zurich                   | Switzerland                                                |
| Soldatini, Cecilia                | researcher                                                      | CICESE                                                          | Mexico                                                     |
| Soldera, Armand                   | Professor in Chemistry                                          | Université de Sherbrooke                                        | Canada                                                     |
| Sole-Cava, Antonio                | Professor - Genetics. Former Dean of the Biology Institute      | Rio de Janeiro Federal University                               | Brazil                                                     |
| SOLER, Nicolas                    | Associate professor / Microbiology                              | Université de Lorraine                                          | France                                                     |
| Soleri, Daniela                   |                                                                 | University of California, Santa Barbara                         | United States of America (the)                             |
| Solidoro, Cosimo                  | Research director oceanography                                  | National institute fornisce oceanography and applied geophysics | Italy                                                      |
| Soliño, Mario                     | Associate professor in Economics                                | Complutense University of Madrid                                | Spain                                                      |
| Solis, Angel                      | Entomologist                                                    | BioAlfa                                                         | Costa Rica                                                 |
| Soliveres, Santiago               | Ramon y Cajal fellow, Ecology                                   | Department of Ecology, University of Alicante                   | Spain                                                      |
| Solla, Alejandro                  | Full Professor                                                  | Faculty of Forestry of Plasencia, University of Extremadura     | Spain                                                      |
| Soller, Raenell                   | Atmospheric Sciences                                            | Georgia Institute of Technology                                 | United States of America (the)                             |
| Sollin, Lars                      | Retired Theoretical Physicist                                   |                                                                 | Sweden                                                     |
| Sollins, Phillip                  | Professor of Forest Ecology and Soils, Emeritus                 | College of Forestry, Oregon State University                    | United States of America (the)                             |

|                                  |                                                                                   |                                                                                  |                                                            |
|----------------------------------|-----------------------------------------------------------------------------------|----------------------------------------------------------------------------------|------------------------------------------------------------|
| Sollmann, Rahel                  | Assistant Professor, Quantitative Ecology                                         | University of California Davis                                                   | United States of America (the)                             |
| Sollner, Gerhard                 | Engineering Fellow / physicist                                                    | Raytheon Company                                                                 | United States of America (the)                             |
| Solomey, Nickolas                | Prof. Of Physics                                                                  | Wichita State University                                                         | United States of America (the)                             |
| Soltis, Douglas                  | Professor of Plant Biology                                                        | University of Florida                                                            | United States of America (the)                             |
| Solymosi, Gábor                  | Data Scientist                                                                    | Budapest University of Technology and Economics                                  | Hungary                                                    |
| Somerville, Vincent              | PhD candidate                                                                     | University of Lausanne                                                           | Switzerland                                                |
| Somerville, Hugh                 | Microbiology                                                                      | retired Prof University of Surrey                                                | United Kingdom of Great Britain and Northern Ireland (the) |
| Somma, Louis A.                  | Biological Scientist & Research Associate/Disciplines: Herpetology & Entomology   | Florida State Collection of Arthropods                                           | United States of America (the)                             |
| Sommer, Morten                   | Professor in Microbiology                                                         | The Technical University of Denmark                                              | Denmark                                                    |
| Sommer, Stefan                   | Ecologist                                                                         | Northern Arizona University                                                      | United States of America (the)                             |
| Sommer, Julia                    | Bioscience                                                                        | Goethe-University Frankfurt/ Main                                                | Germany                                                    |
| Sommers, Pacifica                | Postdoctoral Associate in Ecology and Evolutionary Biology                        | University of Colorado Boulder                                                   | United States of America (the)                             |
| Sommers, Aleah                   | Postdoctoral Fellow, civil engineering, ice sheet and climate modeling            | National Center for Atmospheric Research                                         | United States of America (the)                             |
| Sondenaa, Angela                 | Botanist                                                                          | Nez Perce Tribe                                                                  | United States of America (the)                             |
| Søndergaard, Tonny               | Materials science engineer                                                        | The Technical University of Denmark                                              | Denmark                                                    |
| Sondermann, Wolfram              | independent researcher, Ph.D., Biology                                            | n/a                                                                              | Germany                                                    |
| Songha, Joydeep                  | Senior research fellow in physics                                                 | Indian Institute of Technology Madras                                            | India                                                      |
| Sonkoly, Judit                   | assistant reserach fellow, ecology                                                | University of Debrecen                                                           | Hungary                                                    |
| Sonneck, Judith                  | Global Landscapes Forum Global Assistant Coordinator                              | Center for International Forestry Research                                       | Germany                                                    |
| Sonnemann, Jürgen                | Paediatric Oncology                                                               | Jena University Hospital                                                         | Germany                                                    |
| Soofi, Mahmood                   | Post-doctoral scientist in the File of Conservation Sciences and wildlife Ecology | Workgroup on Endangered Species, Georg-August University of Goettingen, Germany. | Germany                                                    |
| Soomets, Elin                    | Junior Research Fellow in Conservation Biology                                    | University of Tartu                                                              | Estonia                                                    |
| Soon, Xue Qi                     | PhD candidate, Veterinary Science                                                 | Massey University                                                                | Malaysia                                                   |
| Sorbara, Cathy                   | Neuroscience                                                                      |                                                                                  | Netherlands (the)                                          |
| Soreng, Robert                   | PhD Research Associate                                                            | Smithsonian Institution                                                          | United States of America (the)                             |
| Soriano, Esmeralda               | PhD Student                                                                       | Instituto de Biotecnología, UNAM                                                 | Mexico                                                     |
| Soriano Gabarro, Montse          | Head Partnerships and Integrated Evidence Generation Office                       | Bayer AG                                                                         | Germany                                                    |
| Soriano Sánchez, Martha Angélica | Doctoral student on sustainability sciences                                       | ENES-UNAM, Morelia                                                               | Mexico                                                     |
| Soriano-Redondo, Andrea          | Associate Research Fellow                                                         | University of Lisbon                                                             | Portugal                                                   |
| Sorlin, Mahaut                   | PhD student, Integrative Biology                                                  | University of New Orleans                                                        | United States of America (the)                             |
| Sorrell, Karina                  | Ecology and Geomorphology                                                         |                                                                                  | Australia                                                  |
| Sorsa, Tiia                      | Researcher, Social Sciences                                                       | Population Reserach Institute, Family Federation of Finland                      | Finland                                                    |
| Sosa, Ana                        | Biochemist - Engineer                                                             | Institut de Biologie Structurale de Grenoble                                     | Spain                                                      |
| Sosef, Marc                      | Senior Researcher                                                                 | Meise Botanic Garden                                                             | Belgium                                                    |

|                              |                                                                      |                                                                |                                                            |
|------------------------------|----------------------------------------------------------------------|----------------------------------------------------------------|------------------------------------------------------------|
| Soskolne, Colin              | Professor emeritus (Epidemiology)                                    | University of Alberta                                          | Canada                                                     |
| Sosnowski, Pierre            | PhD Student                                                          | UCLouvain                                                      | Belgium                                                    |
| SOSTHEN ALBAN VALERYN, AKIA  | PhD Student in marine science (working on tropical tuna interaction) | CRO and IRD                                                    | Côte d'Ivoire                                              |
| Soto Padilla, Andrea         | Consultant                                                           | FFUND                                                          | Netherlands (the)                                          |
| Soto-Azat, Claudio           | Director Sustainability Research Centre                              | Universidad Andres Bello                                       | Chile                                                      |
| Sotriffer, Christoph         | Professor                                                            | University of Würzburg                                         | Germany                                                    |
| Soudant, Dominique           | Engineer                                                             | IFREMER                                                        | France                                                     |
| Soulard, Christophe          | Senior Researcher                                                    | INRA                                                           | France                                                     |
| Soulen, Jeffrey              | Adjunct Assistant Professor                                          | University of Maryland School of Medicine                      | United States of America (the)                             |
| Soulignac, Frédéric          | Postdoctoral researcher                                              | École polytechnique fédérale de Lausanne                       | Switzerland                                                |
| Soumia, FAHD                 | Full Professor/Ecology, Biodiversity Conservation                    | Faculté des Sciences de Tétouan, Université Abdelmalek Essaâdi | Morocco                                                    |
| SOUQUET, Louise              | post-doc                                                             | MNHN                                                           | France                                                     |
| Souriau, Abel                | PhD Candidate in Behavioural Ecology and Bioacoustic                 | Charles University (Prague)                                    | Czech Republic (the)                                       |
| Sous, damien                 | Associate Professor                                                  | Mediterranean Institute of Oceanography - University of Toulon | France                                                     |
| Sousa, Jose Paulo            | Associate Professor                                                  | Centre for Functional Ecology, University of Coimbra           | Portugal                                                   |
| Souter, Nicholas             | Conservation Science                                                 | Conservation International                                     | Australia                                                  |
| Southern, Lara               | PhD candidate                                                        | Max Planck Institute EVA                                       | Germany                                                    |
| Souto Melo, Uira             | Post-doc                                                             | Max Planck Institute for molecular genetics                    | Germany                                                    |
| Souviron-Priego, Lucrecia    | PhD in Biology                                                       | (1) Universidad de Málaga and (2) Comité Español de la UICN    | Spain                                                      |
| Souza, Alexandre F           | College de professor ecology                                         | Universidade Federal do Rio Grande do Norte                    | Brazil                                                     |
| Souza, Dorge Paulo           | Research associate / Biochemistry                                    | University College London                                      | United Kingdom of Great Britain and Northern Ireland (the) |
| Souza, Jorge                 | Post-doc fellow                                                      | Instituto Nacional da Mata Atlântica - INMA                    | Brazil                                                     |
| Souza, Valeria               | Senior researcher                                                    | Universidad Nacional Autonoma de México                        | Mexico                                                     |
| Souza, Joice                 | PhD Candidate in Ecology and Evolution                               | Universidade do Estado do Rio de Janeiro                       | Brazil                                                     |
| Souza, Andre                 | Technical Advisor Climate and Energy                                 |                                                                | Brazil                                                     |
| Souza, Emanuel               | Professor Associado - Agroecology                                    | Federal University of Rondônia                                 | Brazil                                                     |
| Souza Dias, Pedro            | Professor                                                            | Museu Nacional, Universidade Federal do Rio de Janeiro         | Brazil                                                     |
| Souza Dias, Arildo           | Biologist, research field - Plant and Forest Ecology                 | Goethe University - Institute for Physical Geography           | Germany                                                    |
| Souza Neto, João Adaauto     | Associate Professor / Geology                                        | Federal University of Pernambuco                               | Brazil                                                     |
| Souza-Formigoni, Maria Lucia | Professor - Department of Psychobiology                              | UNIFESP                                                        | Brazil                                                     |
| Souza-Lima, Rosana           | Associate Professor of Zoology                                       | Universidade do Estado do Rio de Janeiro                       | Brazil                                                     |
| Sovinee, Rudy                | Chemistry                                                            | Lehigh University - '70                                        | United States of America (the)                             |
| Sowa, Agnieszka              | Hydrobiology                                                         | University of Silesia in Katowice                              | Poland                                                     |
| Sox, Inge                    | PhD student                                                          | University of Antwerp                                          | Belgium                                                    |

|                         |                                                                                          |                                                                                         |                                                            |
|-------------------------|------------------------------------------------------------------------------------------|-----------------------------------------------------------------------------------------|------------------------------------------------------------|
| Spadini, Lorenzo        | Associate Professor, Environmental Aqueous Chemistry                                     | University of Grenoble-Alpes, France; IGE laboratory                                    | France                                                     |
| Spaet, Julia            | Postdoctoral Fellow                                                                      | University of Cambridge                                                                 | United Kingdom of Great Britain and Northern Ireland (the) |
| Spahn, Lea              |                                                                                          | Philipps-Universität Marburg                                                            | Germany                                                    |
| Spall, Michael          | Senior Scientist, Physical Oceanography                                                  |                                                                                         | United States of America (the)                             |
| Spangenberg, Joachim H. | Biologist (MSc), Ecologist, Economist (PhD)                                              | Sustainable Europe Research Institute SERI Germany                                      | Germany                                                    |
| Spangler, George        | Professor of Fisheries, Wildlife, and Conservation Biology                               | University of Minnesota                                                                 | United States of America (the)                             |
| Sparagon, Wesley        | Graduate Student                                                                         | University of Hawaii at Manoa                                                           | United States of America (the)                             |
| Sparks, Richard         | Aquatic Ecology                                                                          | University of Illinois at Urbana-Champaign                                              | United States of America (the)                             |
| Spatola, Nicolas        | Post-doc Psychology                                                                      | University of Potsdam                                                                   | Germany                                                    |
| Specht, Stephen         | Environmental Protection Specialist (retired)                                            | US Department of the Interior, Office of the Secretary, Office of Environmental Affairs | United States of America (the)                             |
| Speckhard, Daniel       | Researcher in Physics                                                                    | Fritz Haber Institute of the Max Planck Society                                         | Germany                                                    |
| Spedding, Michael       | Pharmacologist, Secretary General International Union of Basic and Clinical Pharmacology | Spedding Research Solutions SAS                                                         | France                                                     |
| SPEDDING, Michael       | President, research company                                                              | Spedding Research Solutions Sas                                                         | France                                                     |
| Speed, Mark             | PhD Hydrology                                                                            | University of Aberdeen                                                                  | United Kingdom of Great Britain and Northern Ireland (the) |
| Spehar, Stephanie       | Associate Professor of Anthropology                                                      | University of Wisconsin Oshkosh                                                         | United States of America (the)                             |
| Speich, Sabrina         | Professor of Physical Oceanography and Climate Sciences                                  | Ecole Normale Supérieure PSL University, LMD-IPSL                                       | France                                                     |
| Speijer, Robert         | Professor in geology                                                                     | KU Leuven                                                                               | Belgium                                                    |
| Spence-Jones, Helen     | Evolutionary Biology                                                                     | University of St Andrews                                                                | United Kingdom of Great Britain and Northern Ireland (the) |
| Spencer, Hugh           | Director                                                                                 | Australian Tropical Research Foundation                                                 | Australia                                                  |
| Spencer, Wayne          | Chief Scientist                                                                          | Conservation Biology Institute                                                          | United States of America (the)                             |
| Spencer, Hamish         | Professor of Zoology                                                                     | University of Otago                                                                     | New Zealand                                                |
| Sperandio, Giorgio      | PhD Student                                                                              | University of Modena and Reggio Emilia                                                  | Italy                                                      |
| Sperlea, Theodor        | Bioinformatics; Ecology                                                                  | Philipps-Universität Marburg                                                            | Germany                                                    |
| Spescha, Anna           | PhD student                                                                              | ETH Zurich                                                                              | Switzerland                                                |
| Spevak, Edward          | Curator of Invertebrates                                                                 | Saint Louis Zoo                                                                         | United States of America (the)                             |
| Speziale, Karina        | Scientific researcher at National Research Council                                       | INIBIOMA (CONICET-UNCOMA)                                                               | Argentina                                                  |
| Spicer, John            | Professor of Marine Zoology                                                              | University of Plymouth                                                                  | United Kingdom of Great Britain and Northern Ireland (the) |
| Spieckermann, Florian   | Senior Scientist (Materials Physics)                                                     | University of Leoben                                                                    | Austria                                                    |
| Spielmann, Julia        | Graduate Student                                                                         | University of Illinois at Urbana-Champaign                                              | United States of America (the)                             |
| Spielmann, Adriano      | Professor - Lichenology                                                                  | Universidade Federal de Mato Grosso do Sul                                              | Brazil                                                     |
| Spiliotopoulou, Maria   | Sustainability researcher                                                                |                                                                                         | Canada                                                     |
| Spillias, Scott         | PhD Candidate, Marine Biology                                                            | University of Queensland                                                                | Australia                                                  |
| Spindler, Uli           | Professor                                                                                | TH Rosenheim                                                                            | Germany                                                    |

|                                       |                                                                                                                                        |                                                                         |                                                            |
|---------------------------------------|----------------------------------------------------------------------------------------------------------------------------------------|-------------------------------------------------------------------------|------------------------------------------------------------|
| Spinelli, Silvia                      | structural biology                                                                                                                     | CNRS                                                                    | France                                                     |
| Spiro, Michel                         | Physicist Emeritus                                                                                                                     | CEA and CNRS                                                            | France                                                     |
| Spironello, Wilson                    | Researcher                                                                                                                             | Instituto Nacional de Pesquisas da Amazonia - INPA                      | Brazil                                                     |
| Spite, François                       | retired astronomer                                                                                                                     | Observatoire de Paris-Meudon = obspm                                    | France                                                     |
| Spitskiy, Sergey                      | Associate Professor (Docent), Department of Engineering Chemistry and Industrial Ecology (Environmental Management, Environmental Law) | Saint-Petersburg State University of Industrial Technologies and Design | Russian Federation (the)                                   |
| Spitz, Loek                           | Mathematician                                                                                                                          | University of Amsterdam                                                 | Netherlands (the)                                          |
| Sponer, Renate                        | PhD, Evolutionary genetics                                                                                                             | Fundación Balu Uala, Colectivo YA ES YA                                 | Panama                                                     |
| Sponsel, Leslie                       | Professor Emeritus/Anthropology                                                                                                        | University of Hawai'i                                                   | United States of America (the)                             |
| Sposito, Tereza Cristina              | Researcher                                                                                                                             | Instituto Bem Ambiental                                                 | Brazil                                                     |
| Spottiswoode, Claire                  | Professor in Conservation Biology                                                                                                      | University of Cape Town                                                 | South Africa                                               |
| Spreckelsen, Florian                  | PhD student, biomedical physics                                                                                                        | Max Planck Institute for Dynamics and Self-organization                 | Germany                                                    |
| Spreeuw, Robert                       | Associate professor, physics                                                                                                           | University of Amsterdam                                                 | Netherlands (the)                                          |
| Sprenger, Matthias                    | Hydrologist                                                                                                                            | North Carolina State University                                         | United States of America (the)                             |
| springer, sabine                      | environmental science                                                                                                                  | self employed                                                           | Ireland                                                    |
| Springer, Vanessa                     | Environmental Scientist - Air Quality                                                                                                  | Cornell University                                                      | United States of America (the)                             |
| Springer, Sabine                      | environmental science                                                                                                                  | none, self employed                                                     | Ireland                                                    |
| Spruth, Dr. Johannes                  | Energieberater                                                                                                                         | Energieberatung Spruth                                                  | Germany                                                    |
| Squeo, Francisco A.                   | Full Professor / Ecology                                                                                                               | University of La Serena                                                 | Chile                                                      |
| Squire, Jonathan                      | Physics                                                                                                                                | University of Otago                                                     | New Zealand                                                |
| Srbek-Araujo, Ana Carolina            | Titular Professor                                                                                                                      | Vila Velha University                                                   | Brazil                                                     |
| Srednick, Griffin                     |                                                                                                                                        | California State University Northridge                                  | United States of America (the)                             |
| Sreevani, Dr.P.                       | Professor of Botany                                                                                                                    | Govt.Degree College, Vizianagaram                                       | India                                                      |
| Srinivasan, Jaishri                   | Postdoctoral Fellow - Transformation Network                                                                                           | University of New Mexico                                                | United States of America (the)                             |
| Srinivasapura Venkateshmurthy, Nikhil | Public Health                                                                                                                          | Public Health Foundation of India                                       | India                                                      |
| Srinivasulu, Bhargavi                 | Scientist - Wildlife Biology                                                                                                           | Department of Zoology, Osmania University, Hyderabad - 500007           | India                                                      |
| Srinivasulu, Chelmala                 | Senior Assistant Professor - Zoology/Wildlife Biology                                                                                  | Osmania University                                                      | India                                                      |
| Sriskandarajah, Nadarajah             | Professor Emeritus for Environmental Communication                                                                                     | Swedish University of Agricultural Scientists                           | Sweden                                                     |
| Srokosz, Meric                        | Professor of Physical Oceanography                                                                                                     | National Oceanography Centre                                            | United Kingdom of Great Britain and Northern Ireland (the) |
| Srur, Ana                             | Resercher Dendroclimatology                                                                                                            | IANIGLA CONICET CCT Mendoza                                             | Argentina                                                  |
| St-Jean, Etienne                      | Professor of Management                                                                                                                | Université du Québec à Trois-Rivières                                   | Canada                                                     |
| Staab, Michael                        | Assistant Professor, Ecology                                                                                                           | University of Freiburg                                                  | Germany                                                    |
| Staaks, Georg                         | Senior Scientist / Fisheries Sciences                                                                                                  | Leibniz-Institute of Freshwater Ecology and Inland Fisheries            | Germany                                                    |
| Stacey, Adam                          | Environmental Director                                                                                                                 |                                                                         | United Kingdom of Great Britain and Northern Ireland (the) |
| Stachowski-Haberkorn, Sabine          | Researcher, phytoplankton ecotoxicology                                                                                                | Ifremer                                                                 | France                                                     |

|                         |                                                      |                                                                                     |                                                            |
|-------------------------|------------------------------------------------------|-------------------------------------------------------------------------------------|------------------------------------------------------------|
| Stack, Charles          | Doctor of Public Health Candidate                    | University of Illinois at Chicago School of Public Health                           | United States of America (the)                             |
| Stacy, Elizabeth        | Associate Professor of Biology                       | University of Nevada Las Vegas                                                      | United States of America (the)                             |
| Stadler, Konstantin     | Industrial Ecology - Researcher and Lab Manager      | Industrial Ecology Programme, Norwegian University of Science and Technology (NTNU) | Norway                                                     |
| Stafford, Richard       | Professor of Marine Biology and Conservation         | Bournemouth University                                                              | United Kingdom of Great Britain and Northern Ireland (the) |
| Stafford-Smith, Mary    | Coral Reef Research Scientist                        | Coral Reef Research, Townsville                                                     | Australia                                                  |
| Stahl, Clément          | Researcher                                           | INRA                                                                                | French Guiana                                              |
| Stahl-Johnson, Kristin  | Fisheries and Ocean Policy                           | OceanPeople Resources                                                               | United States of America (the)                             |
| Stahler, Anna-Margarete | PhD student in Evolutionary Biology                  | University of St Andrews                                                            | United Kingdom of Great Britain and Northern Ireland (the) |
| Stals, Riaan            | Beetle researcher                                    | SA National Collection of Insects                                                   | South Africa                                               |
| Stam, Maike             | Associate Professor/Molecular Biology                | University of Amsterdam                                                             | Netherlands (the)                                          |
| Stamp, Michelle         | ecologist                                            | University of Aberdeen                                                              | United Kingdom of Great Britain and Northern Ireland (the) |
| Stanback, Mark          | Professor of Biology                                 | Davidson College                                                                    | United States of America (the)                             |
| Stanescu, Florina       | Research Associate/ Biology                          | Universitatea Ovidius Constanta                                                     | Romania                                                    |
| Stangl Jr, David        | Sociology                                            |                                                                                     | United States of America (the)                             |
| Stanley, Margaret       | Associate Professor                                  | Biological Sciences, University of Auckland                                         | New Zealand                                                |
| Stanton, Kathryn        | Professor, Dept. of Physics, Astronomy & Geology     | Sacramento City College                                                             | United States of America (the)                             |
| Stanton, Frank          | Professor of Biological Sciences (Retired)           | University of Hawai'i at Lee CC                                                     | United States of America (the)                             |
| Staples, Timothy        | Post-doctoral fellow, community ecology              | University of Queensland                                                            | Australia                                                  |
| staring, jacqueline     | postdoc (medical biology)                            | university of Copenhagen (GLOBE institute)                                          | Denmark                                                    |
| Stark, Scott            | Environmental Chemist                                | Australian Antarctic Division                                                       | Australia                                                  |
| Stark, Jonathan         | Senior Research Scientist/Marine ecology             | Australian Antarctic Division                                                       | Australia                                                  |
| Starke, Stephan         | PhD candidate                                        | Technical University of Berlin                                                      | Germany                                                    |
| stasheff, James         | Prof Emeritus - Math                                 | UNC-CH                                                                              | United States of America (the)                             |
| Stasnik, Peter          | MSc Genetics and developmental biology               | University of Vienna                                                                | Austria                                                    |
| Stassen, Maurice        | PhD Medical Biology, MSc Education                   |                                                                                     | Netherlands (the)                                          |
| Staudacher, Philipp     | Environmental Science                                | Eawag                                                                               | Switzerland                                                |
| Staufer, Oskar          | Scientist in Synthetic Biology                       | Max-Planck Institute for Medical Research                                           | Germany                                                    |
| Staufer Viveros, RAQUEL | Post-doctorate                                       | Universidade Federal de Minas Gerais                                                | Brazil                                                     |
| Stauvermann, Peter J.   | Professor of economics                               | Changwon National University                                                        | Korea (the Republic of)                                    |
| Steadman, David         | Curator                                              | University of Florida                                                               | United States of America (the)                             |
| Steadson, David         | Behavioural Science                                  |                                                                                     | Sweden                                                     |
| Stearns, Stephen        | Professor of Ecology and Evolutionary Biology        | Yale University                                                                     | United States of America (the)                             |
| Steccari, Irene         | Ecology                                              | Universität Wien                                                                    | Austria                                                    |
| Steel, Duncan           | Professor, biophysics, eecs, physics                 | Univ. Michigan                                                                      | United States of America (the)                             |
| Steel, Zachary          | Ecologist                                            | University of California, Berkeley                                                  | United States of America (the)                             |
| Steele-Ogus, Melissa    | Postdoctoral researcher in evolutionary cell biology | Stanford University                                                                 | United States of America (the)                             |
| Steelman, Toddi         | Dean                                                 | Nicholas School of the Environment                                                  | United States of America (the)                             |

|                       |                                                                        |                                                       |                                |
|-----------------------|------------------------------------------------------------------------|-------------------------------------------------------|--------------------------------|
| Steeves, Tammy        | Associate Professor                                                    | University of Canterbury                              | New Zealand                    |
| Stefan, Christian     | Meteorology                                                            | ZAMG Zentralanstalt für Meteorologie und Geodynamik   | Austria                        |
| Stefanovic, Cordula   |                                                                        | University of Natural Resources and Life Sciences     | Austria                        |
| Stefansson, Robert    | Director                                                               | West Iceland Nature Research Centre                   | Iceland                        |
| Steffen, Will         | Emeritus Professor, Earth System science                               | The Australian National University                    | Australia                      |
| Steffen, Andreas      | Professor of Chemistry                                                 | TU Dortmund University                                | Germany                        |
| Steffens, Jutta       | Lecturer in Mathematics and Statistics (PhD)                           | HS Furtwangen University                              | Germany                        |
| Steil, Benedikt       | Senior Scientist                                                       | Max Planck Institute for Chemistry                    | Germany                        |
| Steimle, Viktor       | associate professor biology                                            | Département de Biologie, Université de Sherbrooke, QC | Canada                         |
| Stein, Lisa           | Professor/Microbiology                                                 | University of Alberta                                 | Canada                         |
| Stein, Anke           | Postdoctoral Researcher, Ecology                                       | University of Konstanz                                | Germany                        |
| Stein, Paul M.        | Physiologist                                                           | Ederstrom Enterprises                                 | United States of America (the) |
| Stein, Theodore       | Conservation biologist                                                 | University of Newcastle                               | Australia                      |
| Stein, Staci          | Natural Resource Scientist                                             | Oregon Department Fish and Wildlife                   | United States of America (the) |
| Stein Weiler, Igor    | Graduation Student                                                     | University of Campinas (UNICAMP)                      | Brazil                         |
| Steinberger, Bernhard | Senior Researcher; Geophysics                                          | GFZ German Research Centre for Earth Sciences         | Germany                        |
| Steiner, Richard      | Professor, Marine Conservation Biology                                 | University of Alaska (retired)                        | United States of America (the) |
| Steiner, Ulrich       | Group Leader Evolutionary Demography                                   | Freie Universität Berlin                              | Germany                        |
| Steiner, William      | Dean, College of Agriculture, Forestry and Natural Resource Management | University of Hawaii, Hilo (retired)                  | United States of America (the) |
| Steinmann, Marc       | Lecturer in geochemistry                                               | University of Burgundy Franche-Comté                  | France                         |
| Steinmetz, Tilmann    | Spatial Data Engineer                                                  | National Institute of Water and Atmospheric Research  | New Zealand                    |
| Steinnes, Lasse       | Biology                                                                |                                                       | Norway                         |
| Steinrueck, Magdalena | PhD, Science Communicator, Biology & Interdisciplinary                 | IST Austria                                           | Austria                        |
| Steinruecke, Peter    | Biochemist Microbiologist                                              | Industry R&D                                          | Germany                        |
| Steinsson, Hlynur     | Ecologist                                                              |                                                       | Iceland                        |
| Steinwandter, Michael | Soil Ecologist                                                         | Eurac Research - Institute for Alpine Environment     | Italy                          |
| Stelbrink, Björn      | Postdoctoral researcher                                                | Justus Liebig University Giessen                      | Germany                        |
| Stelzer, Dominikus    | Medical Biometry and Statistics                                        | Medical Center - University of Freiburg               | Germany                        |
| Stelzer, Volker       | Future of energy supply                                                | Karlsruhe Institute of Technology                     | Germany                        |
| Stenger, Pierre-Louis | Ph. D.                                                                 | Ifremer                                               | French Polynesia               |
| Stenhouse, Alan       | Conservation Technology                                                |                                                       | Australia                      |
| Stenkamp, Ronald      | Professor, protein crystallography                                     | University of Washington                              | United States of America (the) |
| Stenkewitz, Ute       | Wildlife Researcher, PhD                                               | University of Iceland                                 | Iceland                        |
| Stenøien, Hans        | Professor of biology                                                   | NTNU University Museum                                | Norway                         |
| Stenzel, Fabian       | Postdoc                                                                | PIK Potsdam                                           | Germany                        |
| Stepanek, John        | PhD student, Coastal Ecology                                           | Oregon State University                               | United States of America (the) |
| Stephan, Marco        | Mechanical Engineering and Energy Technology                           | ETH Zurich                                            | Switzerland                    |



|                       |                                                                        |                                                                        |                                                            |
|-----------------------|------------------------------------------------------------------------|------------------------------------------------------------------------|------------------------------------------------------------|
| Stephan, Jörg         | Researcher                                                             | Swedish University of Agricultural Sciences                            | Sweden                                                     |
| Stephan, Kirsten      | Forestry                                                               | West Virginia University, Division of Forestry and Natural Resources   | United States of America (the)                             |
| Stephen, Bruce        | Ecology                                                                |                                                                        | United States of America (the)                             |
| Stephens, Tara        | Ecologist                                                              |                                                                        | Canada                                                     |
| Stephens, Robert      | Ichthyology                                                            | Bradley University, Retired                                            | United States of America (the)                             |
| Stephens, Philip      | Ecologist                                                              | Durham University                                                      | United Kingdom of Great Britain and Northern Ireland (the) |
| Stephenson, Jessica   | Assistant Professor                                                    | University of Pittsburgh                                               | United States of America (the)                             |
| Stephenson, Janet     | Social scientist, Director, Centre for Sustainability                  | University of Otago                                                    | New Zealand                                                |
| Stephenson, Garry     | Professor, Crop and Soil Science                                       | Oregon State University                                                | United States of America (the)                             |
| Sterckeman, Thibault  | Agronomist                                                             | INRAE                                                                  | France                                                     |
| sterling, peter       |                                                                        | university of pennsylvania                                             | United States of America (the)                             |
| Sterling, Shannon     | Associate Professor                                                    | Dalhousie University                                                   | Canada                                                     |
| Sterman, John         | Jay W. Forrester Professor of Management                               | MIT                                                                    | United States of America (the)                             |
| Sternberg, Marcelo    | Professor/Ecology                                                      | Tel Aviv University                                                    | Israel                                                     |
| Sterner, Erik O       | Researcher in pedagogics of climate change                             | University of Gothenburg                                               | Sweden                                                     |
| Sterner, thomas       |                                                                        | Univ of Gothenburg; ECONOMICS                                          | Sweden                                                     |
| Stettner, Joeran      | PhD student, Astroparticle Physics                                     |                                                                        | Germany                                                    |
| Steup, Andreas        | Biologist                                                              |                                                                        | Germany                                                    |
| Stevens, Daniel       | PhD Student                                                            | Newcastle University                                                   | United Kingdom of Great Britain and Northern Ireland (the) |
| Stevens, Tim          | Lecturer in Marine Biology                                             | Griffith University                                                    | Australia                                                  |
| Stevens, Victoria     | Protected Areas Ecologist, retired                                     | British Columbia Parks                                                 | Canada                                                     |
| Stevens, John         | Associate Professor Lifestyle Medicine                                 | Southern Cross University                                              | Australia                                                  |
| Steward, Peter        | Research Fellow Agricultural Climate Resilience                        | ICRAF / University of Leeds                                            | Kenya                                                      |
| stewart, gavin        | Senior lecturer in Evidence Synthesis, Director Evidence Synthesis Lab | University of Newcastle                                                | United Kingdom of Great Britain and Northern Ireland (the) |
| Stewart, Jim R        | Physics PhD                                                            | OceanForesters                                                         | United States of America (the)                             |
| Stewart, Dorothy      | Research Officer                                                       | Environmental Protection Agency                                        | Ireland                                                    |
| Stewart, Kathryn      | Postdoctoral researcher                                                | University of amsterdam                                                | Netherlands (the)                                          |
| Stewart, Frank        | Associate Professor                                                    | Georgia Institute of Technology                                        | United States of America (the)                             |
| Stewart, Donald J.    | Emeritus Professor                                                     | State Univ. of New York, College of Environmental Science and Forestry | United States of America (the)                             |
| Stewart, Brian        | Professor of Physics                                                   | Wesleyan University                                                    | United States of America (the)                             |
| Stewart, Ian          | PhD Candidate                                                          | MDC Berlin                                                             | Germany                                                    |
| Stewart, Robert       | Bioinformatician                                                       | Roslin Institute, University of Edinburgh                              | United Kingdom of Great Britain and Northern Ireland (the) |
| STEWART, Nola         | High School Science Teacher                                            | (Retired)                                                              | Australia                                                  |
| Stewart Merrill, Tara | Postdoctoral Fellow                                                    | University of Colorado Boulder                                         | United States of America (the)                             |
| Sthel, Marcelo        | Research /climate change                                               |                                                                        | Brazil                                                     |

|                             |                                                                         |                                                                                               |                                |
|-----------------------------|-------------------------------------------------------------------------|-----------------------------------------------------------------------------------------------|--------------------------------|
| Stiassny, Melanie           | Curator/Professor                                                       | Richard Gilder Graduate School, Department of Ichthyology, American Museum of Natural History | United States of America (the) |
| Stift, Marc                 | Assistant Professor, Evolutionary Ecology                               | University of Konstanz                                                                        | Germany                        |
| Stiles, Daniel              | Member                                                                  | IUCN                                                                                          | Kenya                          |
| Still, Christopher          | Associate Professor                                                     | Oregon State University                                                                       | United States of America (the) |
| Stillman, Jonathon          | Professor                                                               | San Francisco State University and University of California Berkeley                          | United States of America (the) |
| Stinus Ruiz de Gauna, Sonia | Postdoctoral researcher / Cell & molecular biology                      | CNRS                                                                                          | France                         |
| STIRNEMANN, Aurélien        | PhD Student in Biology                                                  | Université du Québec à Montréal                                                               | Canada                         |
| Stitelmann, Magali          | Environmental Education Officer - Botany                                | Conservatoire et Jardin botaniques de Genève                                                  | Switzerland                    |
| Stobbe, Marc                | Scientific Collaborator                                                 | Hochschule Biberach                                                                           | Germany                        |
| Stock, Ryan                 | Assistant Professor                                                     | Northern Michigan University                                                                  | United States of America (the) |
| Stockinger, Florian         | GP in training                                                          | private practice                                                                              | Germany                        |
| Stockton, Dr. Richard       | Physiology/Neurobiology                                                 | University of Buffalo                                                                         | United States of America (the) |
| Stoddard, Philip            | Professor                                                               | Florida International University                                                              | United States of America (the) |
| Stoddart, Mark              | Associate Professor of Sociology                                        | Memorial University of Newfoundland                                                           | Canada                         |
| Stoel, Peter                | Wildlife biologist                                                      | TNC Oregon, retired                                                                           | United States of America (the) |
| Stoelzle, Michael           | PhD, Hydrology                                                          | University of Freiburg                                                                        | Ghana                          |
| Stoett, Peter               | Dean, Faculty of Social Science and Humanities                          | Ontario Tech University                                                                       | Canada                         |
| Stoian, Dietmar             | Lead Scientist, Value Chains, Private Sector Engagement and Investments | World Agroforestry (ICRAF)                                                                    | Germany                        |
| Stojanović, Marko           | Postdoc                                                                 | Global change research institute - CzechGlobe                                                 | Czech Republic (the)           |
| Stoker, Carol               | Planetary scientist                                                     | NASA                                                                                          | United States of America (the) |
| Stokes, Peter               | Ph.D. Candidate - Evolutionary Biology                                  | University of California, Berkeley                                                            | United States of America (the) |
| Stokols, Daniel             | Chancellor's Professor                                                  | University of California, Irvine                                                              | United States of America (the) |
| Stokowski, Paricia          | Professor, Natural resource and recreation social sciences              | University of Vermont                                                                         | United States of America (the) |
| Stoldt, Marah               | PhD student                                                             | Institute for Organismic and Molecular Evolution, Johannes Gutenberg University Mainz         | Germany                        |
| Stoll, Thomas               | Mass Spectrometry                                                       | QIMR Berghofer                                                                                | Australia                      |
| Stoll, Alexandra            | Researcher                                                              | CEAZA                                                                                         | Chile                          |
| Stollberg, Maren            | Research Assistant                                                      | Hochschule Geisenheim university                                                              | Germany                        |
| Stompe, Dylan               | PhD Student, Fisheries Biology                                          | UC Davis                                                                                      | United States of America (the) |
| Ston, Julien                | Researcher in Material Sciences                                         | EPFL                                                                                          | Switzerland                    |
| Ston, Daniel                | Biology                                                                 |                                                                                               | Switzerland                    |
| Stone, Michael              | PhD Student in Geology                                                  | Louisiana State University                                                                    | United States of America (the) |
| STONE, WILLIAM              | DISTINGUISHED PROFESSOR OF GENETICS EMERITUS                            | UNIVERSITY OF WISCONSIN                                                                       | United States of America (the) |
| Stonechild, Alexander       | Professor/Indigenous Studies                                            | First Nations University of Canada                                                            | Canada                         |
| Stoppenbrink, Katja         | Ethics                                                                  | Hochschule München & University of Münster                                                    | Germany                        |
| Stopper, Helga              | University Professor Toxicology                                         | University of Wuerzburg in Germany                                                            | Germany                        |

|                                |                                                                                   |                                                                    |                                                            |
|--------------------------------|-----------------------------------------------------------------------------------|--------------------------------------------------------------------|------------------------------------------------------------|
| Storch, Sabine                 | forestry                                                                          | Forest research and competence centre Gotha / ThüringenForst AöR   | Germany                                                    |
| Storck, Pascal                 | Head of Technology, Vaisala Digital                                               | Vaisala                                                            | United States of America (the)                             |
| Stork, Anne                    | Assistant Professor Department of Environmental Studies and Sciences              | Ithaca College                                                     | United States of America (the)                             |
| STORK, NIGEL                   | Emeritus Professor/ Environment                                                   | Griffith University                                                | Australia                                                  |
| Stoss, MS, MLS, Frederick      | Librarian (Faculty Status as Full Professor)                                      | SUNY University at Buffalo                                         | United States of America (the)                             |
| Stoudmann, Natasha             | Researcher, environmental sciences                                                |                                                                    | Switzerland                                                |
| Straehle, Uwe                  | Professor Biology                                                                 | University of Heidelberg and Karlstruhe Insitute of Technology     | Germany                                                    |
| Strahl, Henrik                 | Senior Lecturer, Microbiologist                                                   | Newcastle University                                               | United Kingdom of Great Britain and Northern Ireland (the) |
| Strahm, Wendy                  | Biologist                                                                         | Nos Oiseaux                                                        | Switzerland                                                |
| Strand, Niklas                 | PhD Human-Technology-Design, Senior Researcher                                    | RISE, Research Institutes of Sweden                                | Sweden                                                     |
| Strasberg, Philipp             | Postdoctoral researcher in theoretical physics                                    | Universitat Autònoma de Barcelona                                  | Spain                                                      |
| Strass, Volker                 | PhD/Senior Scientist/Oceanographer                                                | Alfred-Wegener-Institut (AWI)                                      | Germany                                                    |
| Strate, Mirian Fabiane         | Doutoranda em Desenvolvimento rural                                               | UFRGS                                                              | Brazil                                                     |
| Stratford, BD                  | Public Health, retired                                                            | Centers for Disease Control and Prevention, DHHS                   | United States of America (the)                             |
| Strathdee, Steffanie           | Harold Simon Professor, Associate Dean of Global Health Sciences                  | University of California San Diego                                 | United States of America (the)                             |
| Strathmann, Richard            | Professor Emeritus, Biology                                                       | University of Washington                                           | United States of America (the)                             |
| Strauss, W. Maartin            | Senior Lecturer / Conservatin physiology, wildlife biology and management         | University of South Africa                                         | South Africa                                               |
| Strauss, Veronika              | PhD candidate, carbon farming / carbon dioxide removal in agricultural landscapes | Leibniz Centre for Agricultural Landscape Research (ZALF)          | Germany                                                    |
| Strauss, Philipp               | Board Member                                                                      | DERlab eV                                                          | Germany                                                    |
| Streb, Peter                   | assistant professor                                                               | Université Paris Sud                                               | France                                                     |
| Street, Lorna                  | Research Fellow                                                                   | University of Edinburgh                                            | United Kingdom of Great Britain and Northern Ireland (the) |
| Street-Perrott, Frances Alayne | Emeritus Professor of Science                                                     | Swansea University                                                 | United Kingdom of Great Britain and Northern Ireland (the) |
| Strehl, Anna-Marie             | M.Sc. Student, Climate Physics                                                    | GEOMAR                                                             | Germany                                                    |
| Streicher, Melanie             | PhD candidate                                                                     | University of KwaZulu-Natal                                        | South Africa                                               |
| Stressmann, Franziska          | Postdoctoral Researcher in Microecology                                           | Institute for Freshwater Ecology and Inland Fisheries              | Germany                                                    |
| Streveler, Greg                | Ecology/geology                                                                   | Private consultant                                                 | United States of America (the)                             |
| Strick, James                  | Professor and Chair, STS Program                                                  | Franklin and Marshall College                                      | United States of America (the)                             |
| Strid, Ingrid                  | Research scientist                                                                | Energy and technology, Swedsih university of agricultural sciences | Sweden                                                     |
| Strier, Karen                  | Professor of Anthropology                                                         | University of Wisconsin-Madison                                    | United States of America (the)                             |
| Stringer, Lindsay              | Professor in Environment and Development                                          | University of Leeds                                                | United Kingdom of Great Britain and Northern Ireland (the) |
| Stringer, Chris                | Research Leader                                                                   | The Natural History Museum                                         | United Kingdom of Great Britain and Northern Ireland (the) |

|                          |                                                                                     |                                                                                  |                                                            |
|--------------------------|-------------------------------------------------------------------------------------|----------------------------------------------------------------------------------|------------------------------------------------------------|
| Stritih, Ana             | PhD student, Environmental Science                                                  | ETH Zürich                                                                       | Switzerland                                                |
| Strittholt, James        | President                                                                           | Conservation Biology Institute                                                   | United States of America (the)                             |
| Strobl, Barbara          | PhD Researcher                                                                      | University of Zurich                                                             | Switzerland                                                |
| Stroet, Marc             | PhD candidate Chemical Biology                                                      | Erasmus MC                                                                       | Netherlands (the)                                          |
| Strohm, Erhard           | Professor for Evolutionary Ecology                                                  | University of Regensburg                                                         | Germany                                                    |
| Strolka, Onno            | Chemist                                                                             | Institute of Physical Chemistry and Electrochemistry, Leibniz University Hanover | Germany                                                    |
| Strom, Doug              | Aquatic Ecology                                                                     | Water & Air Research, Inc.                                                       | United States of America (the)                             |
| Strom, Douglas           | Aquatic Ecology                                                                     | Water & Air Research                                                             | United States of America (the)                             |
| Stromvik, Martina        | Associate Professor, Plant Science                                                  |                                                                                  | Canada                                                     |
| Stronen, Astrid Vik      | Researcher, Department of Biology                                                   | University of Ljubljana                                                          | Slovenia                                                   |
| Strong, Donald           | Professor, Dept. of Evolution and Ecology                                           | University of California, Davis                                                  | United States of America (the)                             |
| Strong, Geoffrey         | Atmospheric/Climate Scientist                                                       | Vanvouver Island University                                                      | Canada                                                     |
| Stróżecki, Marcin        |                                                                                     | Poznan University of Life Sciences                                               | Poland                                                     |
| Struckman, Soren         | Forestry and Land Stewardship Research Technician                                   | Western Forest Initiative; VA Dept. of Conservation and Recreation               | United States of America (the)                             |
| Struncova, Dagmar        | Pharmacist, PhD. student                                                            | Masaryk University, Brno, Czech Republic                                         | Czech Republic (the)                                       |
| Strutt, John             | Reliability and engineering risk management (retired)                               | Astrimar Ltd                                                                     | United Kingdom of Great Britain and Northern Ireland (the) |
| Struyf, Eric             | Global Change Ecology                                                               | University of Antwerp                                                            | Belgium                                                    |
| Struzka, Eduardo Adrián  | Ingeniero en sistemas biológicos                                                    | Universidad Politécnica de Cataluña                                              | Spain                                                      |
| Stuart, Robert           | Marine biology with emphasis on fisheries science                                   | Retired from Amec Foster Wheeler Environment and Infrastructure                  | United States of America (the)                             |
| Stuart, Emi              | PhD candidate                                                                       | Hawkesbury Institute for the Environment                                         | Australia                                                  |
| Stubblefield, J. William | Evolutionary Biology                                                                | Harvard                                                                          | United States of America (the)                             |
| Stucchi, Marco           | PhD in Neurobiology                                                                 | International Max Planck Research School for Organismal Biology                  | Germany                                                    |
| Stuewe, Kurt             | Professor of Geology                                                                | Dept of Earth Science, University of Graz                                        | Austria                                                    |
| Stumm, Dorothea          | Glaciologist                                                                        | ICIMOD (most recent association)                                                 | Switzerland                                                |
| Stump, Daryl             | Department of Environment and Geography and Department of Archaeology               | University of York                                                               | United Kingdom of Great Britain and Northern Ireland (the) |
| Sturm, Peter             | Computer Science                                                                    | Inria                                                                            | France                                                     |
| Stürner, Klarissa Hanja  | Head of neuroimmunology department at the University Hospital of Schleswig-Holstein | Kiel University                                                                  | Germany                                                    |
| Sturniolo, Simone        | Computational Scientist                                                             | Science and Technology Facility Council                                          | United Kingdom of Great Britain and Northern Ireland (the) |
| Stutchbury, Bridget      | Professor of Biology                                                                | York University                                                                  | Canada                                                     |
| Stute, Judith            | Researcher, PhD Student                                                             | Fraunhofer Institution for Energy Infrastructures and Geothermal Systems         | Germany                                                    |
| Styskel, Ed              | Certified Wildlife Biologist                                                        |                                                                                  | United States of America (the)                             |
| Suarez, Esteban          | Professor                                                                           | Universidad San Francisco de Quito                                               | Ecuador                                                    |

|                                |                                                                      |                                                                                 |                                                            |
|--------------------------------|----------------------------------------------------------------------|---------------------------------------------------------------------------------|------------------------------------------------------------|
| Suarez, Ivan Suarez da Mota    | Pesquisador Científico                                               | Instituto Florestal de São Paulo - Secretaria de Infraestrutura e Meio Ambiente | Brazil                                                     |
| Suárez, Marta                  | Researcher / Ecology                                                 | Ecology and Education for Sustainable Cities Association - Transitando          | Spain                                                      |
| Suárez-Muñoz, María            | PhD student                                                          | University of Granada                                                           | Spain                                                      |
| Suaud, Nicolas                 | Assistant Professor, Chemistry                                       | Université Toulouse 3                                                           | France                                                     |
| Subke, Jens-Arne               | Associate Professor                                                  | University of Stirling                                                          | United Kingdom of Great Britain and Northern Ireland (the) |
| Subrahmaniam, Harihar Jaishree | PhD student in plant ecology. genomics and evolution                 | INRA                                                                            | France                                                     |
| Sucheki, Deborah               | Full professor of Psychobiology                                      | Universidade Federal de Sao Paulo                                               | Brazil                                                     |
| Sucholutsky, Ilia              | PhD Candidate, Statistics                                            | University of Waterloo                                                          | Canada                                                     |
| Suckow, Axel                   | Senior Research Scientist                                            | CSIRO                                                                           | Australia                                                  |
| sue, christian                 | professor, geosciences                                               | Franche Comte University                                                        | France                                                     |
| Suescun, Uxue                  | molecular biology laboratory technician                              | CNRS, Laboratory EDB (evolution and biological diversity)                       | France                                                     |
| Sueur, Cédric                  | Animal Behaviour / Behavioural Ecology                               | Université de Strasbourg                                                        | France                                                     |
| SUEUR, Jérôme                  | Associate Professor                                                  | Muséum national d'Histoire naturelle                                            | France                                                     |
| Sugiyama, Anna                 | Assistant Professor                                                  | University of Hawaii at Manoa                                                   | United States of America (the)                             |
| Sugrue, Ivan                   | Senior Postdoctoral Researcher, Microbiology and Microbiome Research | APC Microbiome Ireland, University College Cork                                 | Ireland                                                    |
| Suh, Dae-Yeon                  | Professor, Biochemistry                                              | University of Regina                                                            | Canada                                                     |
| Suhm, Martin                   | Professor, Physical Chemistry                                        | Goettingen University                                                           | Germany                                                    |
| Sulashvili, Marika             | Family Phycisian, Medical Geneticist                                 | Tbilisi State Medical University                                                | Georgia                                                    |
| Sulkowska, Aleksandra          | PhD student / molecular biology                                      | Warsaw University Institute of Genetic and Biotechnology                        | Poland                                                     |
| Sullivan, Nicola               | Research associate, entomology                                       |                                                                                 | New Zealand                                                |
| Sullivan, Thomas               | Research Associate                                                   | The New Zealand Institute for Plant and Food Research                           | New Zealand                                                |
| Sullivan, Woodruff             | Prof. of Astronomy (Emeritus)                                        | Univ. of Washington                                                             | United States of America (the)                             |
| Sullivan, Gregory Thomas       | Entomology & Ecology                                                 | University of Queensland                                                        | Australia                                                  |
| sumi, angughali                | post-doctoral researcher                                             | institut Fresnel                                                                | France                                                     |
| Sumida, Paulo                  | Professor of Biological Oceanography                                 | University of Sao Paulo                                                         | Brazil                                                     |
| Summerell, Brett               | Chief Botanist                                                       | Royal Botanic Garden Sydney                                                     | Australia                                                  |
| summerhayes, colin             | Emeritus Associate                                                   | Scott Polar Research Institute, Cambridge University                            | United Kingdom of Great Britain and Northern Ireland (the) |
| Summerscales, John             | Professor of Composites Engineering                                  | University of Plymouth                                                          | United Kingdom of Great Britain and Northern Ireland (the) |
| Suné, Galatea                  | Biología evolutiva                                                   |                                                                                 | Spain                                                      |
| Sung, Alexander                | Senior Researcher                                                    | DFKI GmbH                                                                       | Germany                                                    |
| Sunter, Emily                  | Wildlife Biologist                                                   | University of British Columbia - Okanagan                                       | Canada                                                     |
| Suominen, Otso                 | Station Manager, Adj. Professor, Ecology                             | University of Turku                                                             | Finland                                                    |
| Supek, Fran                    | Research Professor (computational biology)                           | Institute for Research in Biomedicine                                           | Spain                                                      |

|                        |                                                     |                                                                                        |                                                            |
|------------------------|-----------------------------------------------------|----------------------------------------------------------------------------------------|------------------------------------------------------------|
| Supramaniam, Pashiini  | PhD candidate chemistry                             | Imperial College London                                                                | United Kingdom of Great Britain and Northern Ireland (the) |
| Surendranadh, Parvathy |                                                     | IST Austria                                                                            | Austria                                                    |
| Surman, Shae           | Postgraduate Student of Zoology                     | The University of Western Australia                                                    | Australia                                                  |
| Susko, David           | Associate Professor, Department of Natural Sciences | University of Michigan-Dearborn                                                        | United States of America (the)                             |
| Suter, Marc            | Deputy Departmenthead, Environmental Toxicology     | Eawag                                                                                  | Switzerland                                                |
| Suter-Jones, Victoria  | Geriatric Medicine Doctor                           | Hywel Dda University Health Board                                                      | United Kingdom of Great Britain and Northern Ireland (the) |
| Sutton, Kevin          | Science Group Leader, Food & Bioproducts Technology | NZ Institute for Plant and Food Research                                               | New Zealand                                                |
| Sutton, Alicia         | Honourary Research Associate                        | Murdoch University                                                                     | Australia                                                  |
| Sutton, Paul           | Professor of Geography and Environmental Science    | University of Denver                                                                   | United States of America (the)                             |
| suzuki, david          | emeritus professor of biology                       | university of british columbia                                                         | Canada                                                     |
| Suzuki, Marcelino      | Director                                            | Sorbonne Univ. CNRS Laboratory of Microbial Biodiversity and Biotechnology             | France                                                     |
| Suzuri, Jiro           | Associate Professor                                 | School of Forensic Science, National Autonomous University of Mexico                   | Mexico                                                     |
| Svanbäck, Richard      | Associate Professor in Animal Ecology               | Uppsala University                                                                     | Sweden                                                     |
| Svanström, Magdalena   | Professor, Environmental Systems Analysis           | Dept Technology Management and Economics, Chalmers University of Technology            | Sweden                                                     |
| Svensson, Jonas        | Postdoc Environmental Science                       | Finnish Meteorological Institute                                                       | Finland                                                    |
| Svensson, Magdalena    | Primatology                                         | Oxford Brookes University                                                              | United Kingdom of Great Britain and Northern Ireland (the) |
| Svensson, Christer     | Professor emeritus in Electronic devices            | Linköping University                                                                   | Sweden                                                     |
| Svimonoff, Constantine | Emergency Physician                                 |                                                                                        | United States of America (the)                             |
| SVISTOONOFF, Sergio    | Researcher                                          | IRD                                                                                    | France                                                     |
| Svitková, Ivana        | researcher                                          | Institute of Botany, Plant Science and Biodiversity Center, Slovak Academy of Sciences | Slovakia                                                   |
| Svitok, Marek          | Ecology                                             | Faculty of Ecology and Environmental Sciences, Technical University in Zvolen          | Slovakia                                                   |
| Swaegers, Janne        | Evolutionary biology                                | Lund University                                                                        | Belgium                                                    |
| Swaminathan, Sivakumar | Scientist                                           | Bombay Natural History Society                                                         | India                                                      |
| Swan, Kelly            | Conservation Biologist                              | Calgary Zoological Society                                                             | Canada                                                     |
| Swan, Hilton           | Adjunct Fellow, Faculty of Science and Engineering  | Southern Cross University                                                              | Australia                                                  |
| Sweet, Michael         | Associate Professor                                 | University of Derby                                                                    | United Kingdom of Great Britain and Northern Ireland (the) |
| Sweetlove, Maxime      | PhD. in microbiology/biogeography                   | Royal Belgian Institute of Natural Sciences                                            | Belgium                                                    |
| Swergold, Gary         | Md, PhD, Genetics, Drig Development                 | GSDx                                                                                   | United States of America (the)                             |
| Swetnam, Thomas        | Regents Professor, Emeritus                         | University of Arizona                                                                  | United States of America (the)                             |
| Świerkosz, Krzysztof   | Associate Professor, Vegetation Ecology             | Museum of Natural History Wroclaw University                                           | Poland                                                     |
| Swietoslawski, Michal  | Assistant Professor                                 | Jagiellonian University, Faculty of Chemistry                                          | Portugal                                                   |
| Swift, Rene            |                                                     | Scottish Oceans Institute, University of St. Andrews                                   | United Kingdom of Great Britain and Northern Ireland (the) |

|                          |                                                              |                                                                                         |                                                            |
|--------------------------|--------------------------------------------------------------|-----------------------------------------------------------------------------------------|------------------------------------------------------------|
| Swift, Michael           | Director (Retired)                                           | Tropical Soil Biology and Fertility Institute                                           | Kenya                                                      |
| Swinnen, Kristijn        | PhD Biology                                                  | Natuurpunt                                                                              | Belgium                                                    |
| Syangbo, Anjalee         | Biomedical Sciences                                          | University of Bristol                                                                   | United Kingdom of Great Britain and Northern Ireland (the) |
| Sylvan, Jason            | Assistant Professor                                          | Texas A&M University                                                                    | United States of America (the)                             |
| sylvander, matthieu      | assistant professor - geophysics                             | Observatoire Midi-Pyrénées                                                              | France                                                     |
| SYLVIE, HOUTÉ            | ENGINEER                                                     | CNRS                                                                                    | France                                                     |
| Systad, Geir             | Scientific Researcher in Ecology                             | Norwegian Institute for Nature Research                                                 | Norway                                                     |
| Szabo, Judit             | Professora Visitante                                         | UFBA                                                                                    | Brazil                                                     |
| Szabó, Attila            | Associate professor                                          | Debrecen University                                                                     | Hungary                                                    |
| Szasz, Andrew            | Professor Emeritus                                           | University of California, Santa Crzu                                                    | United States of America (the)                             |
| Szendro Morales, Enrique | Coordinator for Sustainable Urban Projects                   | Sustainable Development Ministry of Nuevo Leon, Mexico                                  | Mexico                                                     |
| Szewczyk, Tim            | Postdoctoral Associate                                       | University of Lausanne                                                                  | Switzerland                                                |
| Szitar, Katalin          | Biologist, Scientific research assistant                     | MTA Centre for Ecological Research                                                      | Hungary                                                    |
| Szito, Andras            | entomologus/curator                                          | Dept of Primary Industries & RD Western Australia                                       | Australia                                                  |
| Szyja, Michelle          | Scientific assistant and PhD student in Ecology              | Technische Universität Kaiserslautern                                                   | Germany                                                    |
| Szymankiewicz, James     | Medical doctor                                               | Centre for Sustainable Healthcare                                                       | United Kingdom of Great Britain and Northern Ireland (the) |
| Tabak, Nava              | Director of Conservation Science                             | Scenic Hudson                                                                           | United States of America (the)                             |
| Taber, Christopher       | Sports Physiology and Performance                            | Sacred Heart University                                                                 | United States of America (the)                             |
| Tablado, Alejandro       | Curator of the National Collection of Invertebrates          | Museo Argentino de Ciencias Naturales "Bernardino Rivadavia"                            | Argentina                                                  |
| Taboada, Sergi           | Postdoctoral researcher, Marine Biologist                    | Universidad Autónoma de Madrid                                                          | Spain                                                      |
| Taborski, Tom            | Phd in ecophysiology                                         | INRA                                                                                    | France                                                     |
| Taccoen, Adrien          | PhD Student, Forest Ecology                                  | AgroParisTech                                                                           | France                                                     |
| Tacconi, Luca            | Professor                                                    | Crawford School of Public Policy, The Australian National University                    | Australia                                                  |
| Tadich, Tamara           | Associate Professor PhD Veterinary Sciences - Animal Welfare | Universidad de Chile                                                                    | Chile                                                      |
| Tadier, Solène           | Assistant Professor / Material Sciences                      | INSA Lyon, Univ. Lyon                                                                   | France                                                     |
| Taft, Jody M.            | Herpetologist                                                | South African National Biodiversity Institute                                           | South Africa                                               |
| Tagg, Nikki              | Conservation Scientist                                       | The Born Free Foundation                                                                | United Kingdom of Great Britain and Northern Ireland (the) |
| Taggart, Mark            | Senior Research Fellow                                       | University of the Highlands and Islands                                                 | United Kingdom of Great Britain and Northern Ireland (the) |
| Taggart, Patrick         | Ecology                                                      | Vertebrate Pest Research Unit, Department of Primary Industries, NSW Government         | Australia                                                  |
| Tagle, Ximena            | Forestry researcher                                          | Instituto de Investigaciones de la Amazonía Peruana/ Wageningen University and Research | Peru                                                       |
| Tagüeña, Julia           | Researcher (Physics)                                         | Universidad Nacional Autónoma de México                                                 | Mexico                                                     |
| TAHA, ELZUBEIR           | RECTOR                                                       | NAPATA UNIVERSITY COLLEGE , KHARTOUM                                                    | Sudan (the)                                                |

|                                                     |                                                                                        |                                                                                                    |                                                            |
|-----------------------------------------------------|----------------------------------------------------------------------------------------|----------------------------------------------------------------------------------------------------|------------------------------------------------------------|
| Tai, Ying-Feng                                      | Sociology                                                                              | NCCU                                                                                               | Taiwan                                                     |
| Taieb, Maurice                                      | Honorary Scholar                                                                       | AIX Marseille University-CNRS-IRD-INRA-                                                            | France                                                     |
| Taiti, Stefano                                      | Zoology                                                                                | National Reasearch Council                                                                         | Italy                                                      |
| Taiz, Lincoln                                       | Professor Emeritus, MCD Biology                                                        | University of California, Santa Cruz                                                               | United States of America (the)                             |
| Takacs, George                                      | Senior lecturer, Physics                                                               | University of Wollongong                                                                           | Australia                                                  |
| Takaro, Tim K                                       | Professor and Associate Dean for Research                                              | Faculty of Health Sciences, Simon Fraser University                                                | Canada                                                     |
| Take, Ingo                                          | Political Scientist                                                                    | HHU University of Düsseldorf                                                                       | Germany                                                    |
| Takerkart, Sylvain                                  | Neuroscience, Computer Science                                                         | Centre National de la Recherche Scientifique (CNRS)                                                | France                                                     |
| Taklis, Christos                                    | Marine & Conservation Biologist                                                        |                                                                                                    | Greece                                                     |
| Takolander, Antti                                   | Research Scientist, Ecology                                                            | Natural Resources Institute Finland                                                                | Finland                                                    |
| Takriti, Mounir                                     | Research Associate in Environmental Science                                            | Lancaster University                                                                               | United Kingdom of Great Britain and Northern Ireland (the) |
| Talbi, Roy                                          | PhD student                                                                            | University of Haifa                                                                                | Israel                                                     |
| Talbot, Julie                                       | Department of Geography                                                                | Universite de Montreal                                                                             | Canada                                                     |
| Talebi, Mauricio                                    | Associate Professor                                                                    | Federal University of São Paulo, Campus Diadema, Enviromental Sciences Dept.                       | Brazil                                                     |
| TALEBI, MAURICIO                                    | Associate Professor, Biological Anthropology & Conservation Biology                    | Universidade Federal de São Paulo, Departamento de Ciências Ambientais, Campus Diadema, SP, Brazil | Brazil                                                     |
| Talebi Darestani, Mojdeh                            | PhD student in Cell and Molecular Biology                                              | Heidelberg University                                                                              | Germany                                                    |
| Talhadas Marques Barbosa de Madureira, Maria do Céu | Researcher                                                                             | Centre for Functional Ecology University of Coimbra                                                | Portugal                                                   |
| Talhadas Santos, Paulo                              | Assistant Professor /Ecology                                                           | University of Porto                                                                                | Portugal                                                   |
| Tallent, Nita                                       | Scientist & Public Fervent (Retired)                                                   | US Department of Interior                                                                          | United States of America (the)                             |
| Talley, Drew                                        | Biological Oceanography                                                                | University of San Diego                                                                            | United States of America (the)                             |
| Talley, Nicholas                                    | Laureate Professor, Medicine                                                           | University of Newcastle, Australia                                                                 | Australia                                                  |
| Tam, Jorge                                          | Responsible of the Oceanographic, Ecosystem and Climate Change Laboratory              | Peruvian Marine Reserch Institute                                                                  | Peru                                                       |
| Tamarit, Daniel                                     | Postdoctoral researcher                                                                | Wageningen University                                                                              | Netherlands (the)                                          |
| Tamburino, Lucia                                    | Ecology                                                                                | SLU (Swedish University of Agricultural Sciences)                                                  | Sweden                                                     |
| Tames, Maria Florencia                              | PhD                                                                                    | Grupo de Estudios Atmosféricos y Ambientales                                                       | Argentina                                                  |
| Tamir, Dan                                          | Research Associate                                                                     | Dept. of Evolutionary Biology and Environmental Studies, University of Zurich                      | Switzerland                                                |
| Tamme, Riin                                         | Senior Specialist in Macroecology                                                      | University of Tartu                                                                                | Estonia                                                    |
| Tammemae, Kalle                                     | Assoc. Professor                                                                       | Tallinn University of Technology                                                                   | Estonia                                                    |
| Tan, Boon Chin                                      | Senior Lecturer (Plant Science)                                                        | University of Malaya                                                                               | Malaysia                                                   |
| Tanabe, Lyndsey                                     | PhD Marine Science                                                                     | King Abdullah University of Science and Technology                                                 | Saudi Arabia                                               |
| Tanchez, Karla                                      | Psychologist                                                                           | College of Southern Nevada                                                                         | United States of America (the)                             |
| Tang, Tong Bor                                      | Emeritus professor of physics (HKBU); Honorary prof. (Southeast Univ., Nanjing, China) | Hong Kong Baptist University                                                                       | Hong Kong                                                  |
| Tanguay, Louis                                      | Post-doc researcher                                                                    | University of Quebec in Montreal                                                                   | Canada                                                     |
| Tanneberger, Franziska                              | Researcher, Director Greifswald Mire Centre                                            | Greifswald University                                                                              | Germany                                                    |
| Tanner, Lawrence                                    | Professor, Biological and Environmental Sciences                                       | Le Moyne College                                                                                   | United States of America (the)                             |



|                                 |                                                            |                                                                                   |                                                            |
|---------------------------------|------------------------------------------------------------|-----------------------------------------------------------------------------------|------------------------------------------------------------|
| Tanner, Stephen                 | Principal Scientist at biotechnology company               | UCSD                                                                              | United States of America (the)                             |
| Tannier, Cécile                 | Senior researcher - Geography                              | National Centre for Scientific Research                                           | France                                                     |
| Tannier, Eric                   | Researcher                                                 | Inria                                                                             | France                                                     |
| Tantoh, Henry                   | Researcher in Environmental Management and Sustainability  | Unisa                                                                             | South Africa                                               |
| Tapley, David                   | Professor of Biology                                       | Salem State University                                                            | United States of America (the)                             |
| Tapolczai, Kálmán               | Postdoctoral Researcher / Freshwater biology               | Hungarian Academy of Science (MTA) / University of Pannonia                       | Hungary                                                    |
| Tapp, Bryan                     | Professor Emeritus / Structural Geology                    | University of Tulsa                                                               | United States of America (the)                             |
| Tarasov, Lev                    | Professor, earth system dynamics                           | Memorial University of Newfoundland and Labrador                                  | Canada                                                     |
| Tarayre, Michèle                | assistant professor                                        | university Rennes                                                                 | France                                                     |
| Tardif, Stacie                  | PhD                                                        | University of Copenhagen                                                          | Denmark                                                    |
| Tarducci, Luca                  | Medical doctor                                             | University of Pisa                                                                | Italy                                                      |
| Tarroux, Arnaud                 | Research et                                                | Norwegian Institute for Nature Research                                           | Norway                                                     |
| Tarszisz, Esther                | Veterinarian and Biologist                                 |                                                                                   | Australia                                                  |
| Tartari, Gianni                 | Associate Senior Researcher                                | Water Research Institute-National Research Council                                | Italy                                                      |
| Tasca, Fabiane                  | Environmental engineer                                     | Federal University of Santa Catarina                                              | Brazil                                                     |
| Taschner, Michael               | Postdoctoral researcher                                    | University of Lausanne                                                            | Switzerland                                                |
| Tasdemir, Burcu                 | Master student - Structural geology                        | University of Bonn                                                                | Germany                                                    |
| Tasker, Roy                     | Adjunct Professor of Chemistry                             | Western Sydney University                                                         | Australia                                                  |
| Tatarnic, Nikolai               | Curator of Entomology                                      | Western Australian Museum                                                         | Australia                                                  |
| Tate, Janet                     | Professor of Physics                                       | Oregon State University                                                           | United States of America (the)                             |
| Tatiana, Severin                | postdoc in marine biology                                  | W.K. Kellogg Biological Station, Michigan State University                        | United States of America (the)                             |
| Tatin, Laurent                  | conservation biology                                       | free lance                                                                        | France                                                     |
| Tatischeff, Vincent             | Astrophysicist / CNRS director of research                 | CSNSM, CNRS and Univ Paris-Sud, Université Paris Saclay                           | France                                                     |
| Tatum, Natalie                  | Research Associate                                         | Newcastle University                                                              | United Kingdom of Great Britain and Northern Ireland (the) |
| Taubes, Hannibal                | PhD Student                                                | UC Berkeley                                                                       | United States of America (the)                             |
| Taucce, Pedro                   | Postdoctoral Fellow, Zoology                               | São Paulo State University                                                        | Brazil                                                     |
| Taucher, Jan                    | Scientist, Biological Oceanography                         | GEOMAR                                                                            | Germany                                                    |
| Taupin, Jean-Denis              | Senior Researcher- Geochemistry and Isotope in water cycle | Institut de Recherche pour le Développement/Univ. de Montpellier                  | France                                                     |
| Tausan, Ioan                    | Lecturer                                                   | Lucian Blaga University of Sibiu                                                  | Romania                                                    |
| Tavares, Diogo                  | PhD candidate                                              | University of Lausanne                                                            | Switzerland                                                |
| Tavares, Daniela                | PhD student                                                | Centre for Functional Ecology, Department of Life Sciences, University of Coimbra | Portugal                                                   |
| Tavares Azevedo Vieira, Leandro | Plant Ecology                                              | Universidade Presbiteriana Mackenzie                                              | Brazil                                                     |
| Tavares Wahren, Filipa          | Researcher                                                 | Institute of Soil Science and Site Ecology, TU Dresden                            | Germany                                                    |
| Tavaud-Pirra, Muriel            | Assistant professor in Genetics                            | Montpellier SupAgro                                                               | France                                                     |
| Tavera, Jose                    |                                                            | Universidad Del Valle                                                             | Colombia                                                   |

|                            |                                                        |                                                                                  |                                                            |
|----------------------------|--------------------------------------------------------|----------------------------------------------------------------------------------|------------------------------------------------------------|
| Taviani, Marco             | Research Director                                      | Italian National Research Council (CNR)                                          | Italy                                                      |
| Taylor, Nicola             | Research scientist                                     |                                                                                  | United Kingdom of Great Britain and Northern Ireland (the) |
| Taylor, Nigel              | Postdoctoral Researcher                                | Tour du Valat, Research Institute for the Conservation of Mediterranean Wetlands | France                                                     |
| Taylor, Subhashni          | Senior Lecturer in Science Education                   | James Cook University                                                            | Australia                                                  |
| Taylor, Alison             | Professor                                              | University of North Carolina Wilmington                                          | United States of America (the)                             |
| Taylor, Nicole             | Life Science educator/ Honours in Physiology           |                                                                                  | South Africa                                               |
| Taylor, Mark               | Environmental Scientist                                | University of Queenslannd                                                        | Australia                                                  |
| Taylor, Caz                | Ecologist                                              | Tulane University                                                                | United States of America (the)                             |
| Taylor, Gavin              | Computational biologist                                |                                                                                  | Brazil                                                     |
| Taylor, Graeme             | Adjunct Fellow, Global Change Institute                | University of Queensland                                                         | Australia                                                  |
| Taylor, John W.            | Professor, Evolution, Ecology, Mycology                | University of California                                                         | United States of America (the)                             |
| Taylor, Amanda             | Research Associate                                     | University of Göttingen                                                          | Germany                                                    |
| Taylor, Kirk               | Research & Development Engineer                        | Ford Motor Company of Canada                                                     | Canada                                                     |
| Taylor, Norman             | clinical biochemist                                    | King's College Hospital London                                                   | United Kingdom of Great Britain and Northern Ireland (the) |
| Taylor, Eliot              | Consultant Environmental Scientist                     | Mott MacDonald                                                                   | Rwanda                                                     |
| Taylor, Liam               | PhD Student in Glaciology                              | University of Leeds                                                              | United Kingdom of Great Britain and Northern Ireland (the) |
| Taylor, Christopher        | Professor, Aquatic Ecology                             | University of Texas Rio Grande Valley                                            | United States of America (the)                             |
| Tayyab, Mustafa            | Scientist                                              | Jawaharlal Nehru Madical College India                                           | India                                                      |
| te Brinke, Esra            | Food safety researcher                                 | Wageningen University & Research                                                 | Netherlands (the)                                          |
| Tedesco, Anazelia          | PhD Candidate, Forest Restoration                      | The University of Queensland                                                     | Australia                                                  |
| Tedesco, Letizia           | Senior Research Scientist - Oceanography               | Finnish Environment Institute                                                    | Finland                                                    |
| Teele, Rebecca             | Ecologist                                              |                                                                                  | New Zealand                                                |
| Teertstra, David           | senior researcher PhD materials science Univ. Manitoba | Union of Canadians                                                               | Canada                                                     |
| Tefsen, Boris              | Senior Associate Professor Molecular Microbiology      | Xi'an Jiaotong-Liverpool University                                              | China                                                      |
| Tegen, Ina                 | Atmospheric Sciences                                   | Leibniz Institute for Tropospheric Research                                      | Germany                                                    |
| Teixeira, Daniella         | Conservation science                                   | University of Queensland                                                         | Australia                                                  |
| Teixeira, Carlos           | Post-Doctoral Researcher                               | University of Lisbon; Instituto Superior Técnico (IST)                           | Portugal                                                   |
| Teixeira, Juliana          | PhD student                                            | Universidade Estadual Paulista - Rio Claro - Departamento de Botânica            | Brazil                                                     |
| Teixeira Brandao, Maria    | Engineer                                               | Université de Bourgogne                                                          | France                                                     |
| Tejeda-Martinez, Adalberto | Researcher                                             | Universidad Veracruzana                                                          | Mexico                                                     |
| Tejerina, Silvana Yanina   | Docente Climatología                                   | Universidad Nacional de Jujuy, Facultad de Ciencias Agrarias, Jujuy              | Argentina                                                  |
| Teles, Aristônio           | Professor / Plant Taxonomy                             | Universidade Federal de Goiás                                                    | Brazil                                                     |
| Tella, José L.             | Professor, Conservation Biology                        | Estación Biológica de Doñana (CSIC)                                              | Spain                                                      |
| Tellier, Aurelien          | Professor for Population Genetics                      | Technical University of Munich                                                   | Germany                                                    |

|                                  |                                                              |                                                                                  |                                                            |
|----------------------------------|--------------------------------------------------------------|----------------------------------------------------------------------------------|------------------------------------------------------------|
| Telnov, Dmitry                   | Biology (zoology, nature conservation)                       | Natural History Museum, London                                                   | United Kingdom of Great Britain and Northern Ireland (the) |
| Temino-Boes, Regina              | Water and Environmental Engineering                          | Universitat Politècnica de València                                              | Spain                                                      |
| Temperton, Vicky                 | Full Professor of Ecology                                    | Leuphana University Lüneburg                                                     | Germany                                                    |
| Templ, Barbara                   | Scientific Project Manager                                   | Potsdam Institute for Climate Impact Research                                    | Germany                                                    |
| Templado, José                   |                                                              | Spanish Research Council (CSIC)                                                  | Spain                                                      |
| ten Hooven, Freddy               | Research technician                                          | Netherlands Institute of Ecology                                                 | Netherlands (the)                                          |
| ten Veldhuis, Marie-claire       | Associate professor                                          | Delft University of Technology                                                   | Netherlands (the)                                          |
| Tenan, Simone                    | Tenured Researcher                                           | MUSE - Museo delle Scienze di Trento                                             | Italy                                                      |
| Teneta-Skwiercz, Dorota          | Wroclaw University of Economics Professor                    | Szanowna Pani                                                                    | Poland                                                     |
| Tennessen, Jacob                 | Research Associate, Immunology and Infectious Diseases       | Harvard T.H. Chan School of Public Health                                        | United States of America (the)                             |
| Tenzer, Selina                   | PhD Soil Scientist                                           |                                                                                  | Germany                                                    |
| Tenzin, Jinba                    |                                                              | National University of Singapore                                                 | Singapore                                                  |
| Teplitsky, Celine                | Evolutionary Biologist                                       | CNRS                                                                             | France                                                     |
| Terasmaa, Jaanus                 | Senior Researcher                                            | Institute of Ecology at Tallinn University                                       | Estonia                                                    |
| TerBeek, Emma                    | Environmental Engineer                                       | University of Michigan                                                           | United States of America (the)                             |
| Terborgh, John                   | Professor Emeritus of Environmental Science                  | Duke University                                                                  | United States of America (the)                             |
| Teren, Gabriella                 | Ecologist                                                    | University of the Witwatersrand                                                  | South Africa                                               |
| Terli, Özden                     | Meteorologist (Diploma) on Screen/ Climate Communicator      | German Television                                                                | Germany                                                    |
| Termentzidis, Konstantinos       | CNRS researcher, Physics                                     | CNRS                                                                             | France                                                     |
| Terpitz, Ulrich                  | Lecturer                                                     | Julius Maximilian University Wuerzburg                                           | Germany                                                    |
| Terraube, Julien                 | Senior Research Fellow-Ecology and Biodiversity Conservation | University of Helsinki                                                           | Finland                                                    |
| Terseleer, Nathan                | Marine ecosystems                                            | Royal Belgian Institute of Natural Sciences                                      | Belgium                                                    |
| Terstiege, Thomas                | Cognitive Science (Linguistics / Computer Science)           |                                                                                  | Germany                                                    |
| Teruel Montejano, Santiago Ramón | Biologia                                                     | Parotets S.O.C.V.                                                                | Spain                                                      |
| Tessema, Mekbeb                  | Biodiversity & Environmental Conservation                    | Independent                                                                      | Ethiopia                                                   |
| TESSER, CHARLES                  | Associate Professor of Public Health                         | Federal University of Santa Catarina                                             | Brazil                                                     |
| Tettamanti, Gianluca             | Associate Professor                                          | University of Insubria                                                           | Italy                                                      |
| Tettelbach, Stephen              | Professor Emeritus of Biology                                | Long Island University                                                           | United States of America (the)                             |
| Teubler, Franziska               | Postdoctoral Researcher/ Atmospheric Physics                 | Johannes Gutenberg-University Mainz                                              | Germany                                                    |
| Teufel, Robin                    | Microbiology                                                 |                                                                                  | Germany                                                    |
| Teurlings, Peter                 | Professional Natural Scientist (Environmental Discipline)    | South African Council for Natural Scientific Professions (SACNASP)               | South Africa                                               |
| Thackeray, Stephen               | Freshwater ecologist                                         |                                                                                  | United Kingdom of Great Britain and Northern Ireland (the) |
| Thaden, Eike Martin              | Computer Science                                             | Robert Bosch GmbH, Corporate Research                                            | Germany                                                    |
| Thakore, Renuka                  | Founder of GSFN and Director for CSLS                        | Global Sustainable Futures Network CIC and Centre for Socio-Legal Studies, UCLan | United Kingdom of Great Britain and Northern Ireland (the) |

|                         |                                                       |                                                                   |                                                            |
|-------------------------|-------------------------------------------------------|-------------------------------------------------------------------|------------------------------------------------------------|
| Thakuri, Sudeep         | Associate Professor                                   | Tribhuvan University, Central Department of Environmental Science | Nepal                                                      |
| Thalmann, Philippe      | Professor of environmental economics                  | École Polytechnique Fédérale de Lausanne                          | Switzerland                                                |
| Thaman, Randy           | Emeritus Professor of Pacific Islands Biogeography    | University of the South Pacific                                   | Fiji                                                       |
| Thammineni, Pullaiah    | Professor of Botany                                   | Sri Krishnadevaraya University                                    | India                                                      |
| Thandar, Ahmed          | Emeritus Professor                                    | University of KwaZulu-Natal                                       | South Africa                                               |
| Thapa, Lal              | Asst. Professor                                       | Central Department of Botany, Tribhuvan University                | Nepal                                                      |
| Thapa, Philipp          | Environmental Philosophy, Social Ecology              | University of Greifswald                                          | Germany                                                    |
| Thayer, Margaret        | Curator Emerita of Insects                            | Field Museum of Natural History                                   | United States of America (the)                             |
| Theau, Jerome           | Professor                                             | Universite de Sherbrooke                                          | Canada                                                     |
| Theirlynck, Tom         | PhD candidate                                         | Royal Netherlands Institute for Sea Research (NIOZ)               | Netherlands (the)                                          |
| Theis-Broehl, Katharina | Professor in Physics                                  | University of Applied Sciences Bremerhaven                        | Germany                                                    |
| Thel, Lucie             | PhD student in evolutionary biology                   | LBBE - University of Lyon                                         | France                                                     |
| Themudo, Gonçalo        | Researcher                                            | CIIMAR                                                            | Portugal                                                   |
| Théo, Damasio           | Scientific intern in ecology                          | IRSTEA                                                            | France                                                     |
| theobald, emma          | Bioscience                                            | University of Exeter                                              | United Kingdom of Great Britain and Northern Ireland (the) |
| Theodor, Jessica        | Professor, Biological Sciences                        | University of Calgary                                             | Canada                                                     |
| Theodorakakis, Marios   | Forester, Environmentalist PhD                        | AMBIO S.A.                                                        | Greece                                                     |
| Theodorou, Ioannis      | PhD, Macroalgal morphogenesis                         | Station Biologique de Roscoff                                     | France                                                     |
| Theofilos, Poutahidis   | Professor, Veterinary Pathology                       | Aristotle University of Thessaloniki                              | Greece                                                     |
| Theraulaz, Guy          | Research Director at CNRS, Collective Animal behavior | Centre National de la Recherche Scientifique                      | France                                                     |
| Theurillat, Jean-Paul   | Vegetation science                                    | University of Geneva                                              | Switzerland                                                |
| Thevelein, Johan        | Professor in Molecular Cell Biology and Biotechnology | VIB & KU Leuven                                                   | Belgium                                                    |
| THEVENIN, Charles       | PhD in Biological Conservation                        | Sorbonne Université                                               | France                                                     |
| Thewlis, Richard        | Ecologist                                             | Aecom                                                             | United Kingdom of Great Britain and Northern Ireland (the) |
| Thibault, Nicolas       | Lecturer in Geology                                   | University of Copenhagen                                          | Denmark                                                    |
| THIEBEAU, Pascal        | Agronome                                              | INRA                                                              | France                                                     |
| Thiel, Joana            | Microbial Ecology                                     | University of Konstanz                                            | Germany                                                    |
| Thiele, Torsten         | Senior Research Associate                             | IASS                                                              | Germany                                                    |
| Thiele, Christina       | PhD researcher Environmental Science                  | University of Southampton                                         | United Kingdom of Great Britain and Northern Ireland (the) |
| Thieron, Marcel         | Biologist / Phytopathology                            | amagrar GmbH                                                      | Germany                                                    |
| Thierry, Chloé          | Ecology                                               | Muséum national d'Histoire naturelle                              | France                                                     |
| Thierry, Virginie       | Researcher in physical oceanography                   | Ifremer                                                           | France                                                     |
| Thierry, Anne-Mathilde  | Polar Biology                                         | Norwegian Institute for Nature Research                           | France                                                     |
| Thiery, Wim             | Professor climate science                             | Vrije Universiteit Brussel                                        | Belgium                                                    |
| Thioulouse, Jean        | Senior scientist biostatistics                        | CNRS                                                              | France                                                     |
| Thirel, Guillaume       | Hydrologist                                           | Irstea                                                            | France                                                     |
| Thirumalai, Avinash     | postdoc                                               |                                                                   | India                                                      |

|                        |                                                    |                                                                          |                                                            |
|------------------------|----------------------------------------------------|--------------------------------------------------------------------------|------------------------------------------------------------|
| Tholen, Danny          | Plant Physiologist                                 | University of Natural Resources and Life Sciences, Vienna (BOKU)         | Austria                                                    |
| Thomas, Kelly          | Ecologue                                           | Wild - AFIE                                                              | France                                                     |
| Thomas, Alexander      | PhD student in Environmental Sciences              | SUSTech                                                                  | China                                                      |
| Thomas, Evert          | scientist forest genetic resources                 | Bioversity International                                                 | Peru                                                       |
| Thomas, Haydn          | Ecology                                            | University of Edinburgh                                                  | United Kingdom of Great Britain and Northern Ireland (the) |
| Thomas, Chris D        | Professor of Biology                               | University of York                                                       | United Kingdom of Great Britain and Northern Ireland (the) |
| Thomas, Heather        | Paediatrician                                      | Wexham Park Hospital                                                     | United Kingdom of Great Britain and Northern Ireland (the) |
| Thomas, Zahra          | Associate professor                                | AGROCAMPUS OUEST                                                         | France                                                     |
| Thomas, Pascal         | Professor of mathematics                           | Institut de Mathématiques de Toulouse (Université Paul Sabatier)         | France                                                     |
| Thomas, Kent           | Civil and Disaster Prevention Engineering          | National Taipei University of Technology                                 | Taiwan                                                     |
| Thomas, Camille        | Geologist-Geomicrobiologist                        | University of Geneva                                                     | Switzerland                                                |
| Thomas, Hoaka          | Graduate Assistant                                 | University of Hawaii at Mānoa                                            | United States of America (the)                             |
| Thomas, Richard        | Professor (retired), Biology Department            | University of Puerto Rico                                                | Puerto Rico                                                |
| Thomas, Peyton         | Graduate Student- Biology and Marine Biology       | UNC-Wilmington                                                           | United States of America (the)                             |
| Thomas, Lindsey        | Environmental Scientist                            | EPM                                                                      | United States of America (the)                             |
| Thomas, Alex           | Honorary Research Fellow in Health Informatics     | University of Melbourne                                                  | Australia                                                  |
| Thomas-Bulle, Camille  | PhD student in Evolution                           | Sorbonne Université                                                      | France                                                     |
| Thomason, Michael      | Director, Physics Learning Laboratories            | UC Boulder Physics                                                       | United States of America (the)                             |
| Thomaz, Sidinei Magela | Professor of Ecology                               | Universidade Estadual de Maringá                                         | Brazil                                                     |
| Thomborson, Barbara    | lecturer in Academic communication                 |                                                                          | New Zealand                                                |
| Thomborson, Clark      | Professor, Computer Science                        | University of Auckland                                                   | New Zealand                                                |
| thompson, joanne       | Senior Lecturer                                    | School of Biological Sciences, University of Edinburgh                   | United Kingdom of Great Britain and Northern Ireland (the) |
| Thompson, Madalynn     | Masters Student                                    | University of Calgary                                                    | Canada                                                     |
| Thompson, Troy         | Hydrogeologist                                     |                                                                          | United States of America (the)                             |
| Thompson, Connor       | Ph.D. Candidate in Environmental and Life Sciences | Trent University                                                         | Canada                                                     |
| Thompson, Megan        | Researcher - Wildlife Biology                      | University of Ottawa                                                     | Canada                                                     |
| Thompson, Jeffrey      | Research Scientist                                 | Guyra Paraguay - CONACYT                                                 | Paraguay                                                   |
| Thompson, Kirsten      | Ecologist                                          | University of Exeter                                                     | United Kingdom of Great Britain and Northern Ireland (the) |
| Thompson, Nicola       |                                                    | Wellcome sanger Institute                                                | United Kingdom of Great Britain and Northern Ireland (the) |
| Thompson, Kristin      | PhD researcher                                     | University of Exeter                                                     | United Kingdom of Great Britain and Northern Ireland (the) |
| Thompson, Alton        | Geography                                          | Miami University, but most of career with an avionics firm in Milwaukee. | United States of America (the)                             |
| Thompson, Jamie        | PhD student, Biodiversity and Climate Change       | University of Bath                                                       | United Kingdom of Great Britain and Northern Ireland (the) |

|                               |                                                                                      |                                                                       |                                                            |
|-------------------------------|--------------------------------------------------------------------------------------|-----------------------------------------------------------------------|------------------------------------------------------------|
| Thompson, Alton C.            | Retired; Ph. D. in Urban Economic Geography                                          | Miami University                                                      | United States of America (the)                             |
| Thompson, Claire              | Naturalist                                                                           | Nature Vision                                                         | United States of America (the)                             |
| Thomschke, Susan              | PhD Candidate Geography                                                              | University of Bayreuth                                                | Germany                                                    |
| Thomsen, Corrina              | Plant-Soil Ecology                                                                   | UBC Okanagan                                                          | Canada                                                     |
| Thomson, Robert               | Senior Lecturer                                                                      | FitzPatrick Institute of African Ornithology, University of Cape Town | South Africa                                               |
| Thomson, Jordan               | PhD Ecology                                                                          | –                                                                     | Canada                                                     |
| Thomson, Jordy                | Ecology and Conservation                                                             | Ecology Action Centre                                                 | Canada                                                     |
| Thöni, Armel                  | software development engineer, modelizing of natural processes under human influence | INRA Montpellier                                                      | France                                                     |
| Thoral, Francois              | PhD Student                                                                          | University of Canterbury                                              | New Zealand                                                |
| Thoren, Franz                 | Retired engineer in electrical engineering                                           | Bosch Rexroth AG                                                      | Germany                                                    |
| Thoresen, Joshua              | Ecology                                                                              | University of Cape Town                                               | South Africa                                               |
| Thorn, Jessica                | Climate change adaptation                                                            | University of York, University of Cape Town                           | Namibia                                                    |
| THORNER, Jeremy               | Professor of Biochemistry, Biophysics & Structural Biology                           | University of California, Berkeley                                    | United States of America (the)                             |
| Thornton, Alex                | Associate Professor; Centre for Ecology and Conservation                             | University of Exeter, Penryn Campus                                   | United Kingdom of Great Britain and Northern Ireland (the) |
| Thornton, Catherine           | Marine Biology                                                                       | Shaw Centre for the Salish Sea                                        | Canada                                                     |
| Thorsteinsdottir, Solveig     | Associate Professor, Biology                                                         | University of Lisbon, Faculty of Sciences                             | Portugal                                                   |
| Thrift-Viveros, Dalina        | Pollution Response Chemist                                                           | National Oceanic and Atmospheric Administration                       | United States of America (the)                             |
| Thuesen, Erik V               | Member of the Faculty, Zoology                                                       | Evergreen State College                                               | United States of America (the)                             |
| Thuile Bistarelli, Lukas      | PhD Student                                                                          | Institute of Freshwater Science and Inland Fisheries                  | Germany                                                    |
| Thuiller, Wilfried            | Researcher in ecology and statistics                                                 | CNRS - Univ. Grenoble Alpes                                           | France                                                     |
| Thuillier, Thomas             | Ingénieur de recherche - physique des accélérateurs                                  | CNRS                                                                  | France                                                     |
| Thumfart, Alexander           | Professor of Political Science                                                       | University of Erfurt                                                  | Germany                                                    |
| Thunnissen, Marjolein         | Life Science Director MAX IV synchrotron                                             | MAX IV                                                                | Sweden                                                     |
| Thurland, Michael             | Natural resources management specialist                                              | Conthur environment                                                   | Denmark                                                    |
| Thyagarajan, Harshavardhan    | Evolutionary genetics                                                                | Queen's university                                                    | Canada                                                     |
| Tian, Ye                      | PhD candidate                                                                        | University of Vienna                                                  | China                                                      |
| Tian, Allen                   | Biologist                                                                            | Queen's University                                                    | Canada                                                     |
| Tian, Tian                    | ocean and cryosphere                                                                 | University of Tasmania                                                | Australia                                                  |
| Tibaldo, Luigi                | Staff Astronomer                                                                     | Observatoire Midi-Pyrénées, Toulouse                                  | France                                                     |
| Tibboel, Pieter               | Lecturer                                                                             | Xi'an Jiaotong-Liverpool University                                   | China                                                      |
| Tiberi, Simone                | Postdoc in Statistics                                                                | Institute of Molecular Life Sciences                                  | Switzerland                                                |
| Tibirica, Yara                | Researcher                                                                           | Zavora Marine Lab.                                                    | Mozambique                                                 |
| Ticehurst@anu.edu.au, Jenifer | Research Fellow                                                                      | Australian National University                                        | Australia                                                  |
| Tickle, Ian                   | Structural Molecular Biology                                                         | Global Phasing Ltd.                                                   | United Kingdom of Great Britain and Northern Ireland (the) |
| Ticktin, Tamara               | Professor of Botany                                                                  | University of Hawaii at Manoa                                         | United States of America (the)                             |
| Tiebout, Harry                | Professor of Ecology & Conservation                                                  | West Chester University                                               | United States of America (the)                             |
| Tielbörger, Katja             | Professor for Plant Ecology                                                          | University of Tübingen                                                | Germany                                                    |

|                                 |                                                                     |                                                                            |                                                            |
|---------------------------------|---------------------------------------------------------------------|----------------------------------------------------------------------------|------------------------------------------------------------|
| Tielking, Knut                  | Professor                                                           | University of Applied Sciences Emden/Leer                                  | Germany                                                    |
| Tieman, Gordon                  | Forest Pathologist                                                  | Scion Forestry Research                                                    | New Zealand                                                |
| Tiemann, Tassilo                | Agricultural research consultant                                    | Freelance                                                                  | Lao People's Democratic Republic (the)                     |
| Tiemann, Johanna                | PhD Candidate                                                       | University Leipzig                                                         | Germany                                                    |
| Tierno de Figueroa, José Manuel | Associate Professor                                                 | Universidad de Granada                                                     | Spain                                                      |
| Tietje, Olaf                    | Prof. Dr. (University Applied Science) Mathematics                  | Fachhochschule Ostschweiz (www.ost.ch)                                     | Switzerland                                                |
| Tietjen, Kristina               | Project manager and graduate student                                | University of Victoria - Baum Lab                                          | Canada                                                     |
| Tietjen, Britta                 | Professor for Theoretical Ecology                                   | Freie Universität Berlin                                                   | Germany                                                    |
| Tietze, Dieter Thomas           | Curator Vertebrates                                                 | Natural History Museum Basel                                               | Switzerland                                                |
| Tietze, Max                     | PostDoctoral Fellow                                                 | KU Leuven                                                                  | Belgium                                                    |
| Tigini, Valeria                 | Post Doc                                                            | Department of Natural Sciences and Systems' Biology, University of Turin   | Italy                                                      |
| Tignat, Romie                   | PhD student in microbiology                                         | Ecole Centrale de Lyon                                                     | France                                                     |
| Tikka, Ville                    | Project Researcher, Social and Public Policy                        | University of Jyväskylä                                                    | Finland                                                    |
| Tilder, Jesse                   | Bachelor Plant Science                                              | Wageningen University                                                      | Netherlands (the)                                          |
| Till-Bottraud, Irène            | Researcher in evolutionary biology                                  | CNRS                                                                       | France                                                     |
| Tillmann, Dr. Frank             | Senior Researcher                                                   | German Youth Institute                                                     | Germany                                                    |
| Tilquin, Anaïs                  | PhD student in evolutionary biology                                 | University of Zürich                                                       | Switzerland                                                |
| Tilstra, Arjen                  | PhD candidate                                                       | Universitat of Bremen, Marine Ecology Group                                | Germany                                                    |
| Timberlake, Jonathan            | Botanist                                                            | Biodiversity Foundation for Africa                                         | United Kingdom of Great Britain and Northern Ireland (the) |
| Timm, Robert M.                 | Professor                                                           | University of Kansas                                                       | United States of America (the)                             |
| Timm, Gary                      | Retired                                                             | U.S. Environmental Protection Agency                                       | United States of America (the)                             |
| Timmis, Anna                    | GP                                                                  | RCGP                                                                       | United Kingdom of Great Britain and Northern Ireland (the) |
| Timmis, Kenneth                 | Emeritus Professor                                                  | Technical University Braunschweig                                          | Germany                                                    |
| Timóteo, Sérgio                 | Junior Researcher                                                   | Centre for Functional Ecology                                              | Portugal                                                   |
| Timppte, Candace                | Professor                                                           | Georgia Gwinnett College                                                   | United States of America (the)                             |
| Tinner, Willy                   | Professor in Plant Sciences and Climate Change Research             | University of Bern                                                         | Switzerland                                                |
| Tinya, Flóra                    | research fellow, ecologist                                          | MTA Centre for Ecological Research                                         | Hungary                                                    |
| Tirpitz, Jan-Lukas              | PhD student, Environmental Physics                                  | Institute of Environmental Physics - University of Heidelberg              | Germany                                                    |
| Tiso, Till                      | Research Group Leader, Microbiology                                 | RWTH Aachen UNiversity                                                     | Germany                                                    |
| Tisserand, Lucas                | PhD Student in Aquatic Microbial Ecology                            | Laboratoire d'Océanographie Microbienne - UMR7621 CNRS-Sorbonne Université | France                                                     |
| Tissier, Mathilde               | Research scholar / biology                                          | Bishop's University                                                        | Canada                                                     |
| Tissot, Tazio                   | Postdoctoral fellow in Evolutionary biology                         | Muséum National d'Histoire Naturelle                                       | France                                                     |
| Tissot, Jean-Daniel             | Sysamin                                                             | CNRS                                                                       | France                                                     |
| Titchen, Angie                  | Former Clinical Chair, Knowledge Centre for Evidence-Based Practice | Fontys University of Applied Sciences, Eindhoven, The Netherlands          | United Kingdom of Great Britain and Northern Ireland (the) |

|                                    |                                                                           |                                                                                                             |                                                            |
|------------------------------------|---------------------------------------------------------------------------|-------------------------------------------------------------------------------------------------------------|------------------------------------------------------------|
| Titley, Mark                       | PhD Candidate in Ecology                                                  | Durham University                                                                                           | United Kingdom of Great Britain and Northern Ireland (the) |
| Titschack, Jürgen                  | Researcher, marine geology                                                | MARUM - Center for Marine Environmental Sciences, University of Bremen                                      | Germany                                                    |
| Titshall, Louis                    | Senior Soil Scientist                                                     | South African Sugarcane Research Institute                                                                  | South Africa                                               |
| Tiunov, Alexei                     | Researcher in Ecology                                                     | A.N. Severtsov Institute of Ecology and Evolution, Russian Academy of Sciences, Russian Academy of Sciences | Russian Federation (the)                                   |
| Tjaden, Tjarko                     | Research Associate / Renewable Energy Systems                             | University of Applied Sciences Emden/Leer                                                                   | Germany                                                    |
| Tobajas, Jorge                     | Postdoctoral researcher in Ecology and Wildlife Management                | University of Córdoba                                                                                       | Spain                                                      |
| Tobin, Deborah                     | Professor of Biological Sciences                                          | University of Alaska Anchorage - KBC                                                                        | United States of America (the)                             |
| Tobin, Amanda                      | Meteorology researcher                                                    | Universidad Autónoma de Madrid                                                                              | Spain                                                      |
| Toczylowska-Maminska, Renata       | assistant professor                                                       | Warsaw University of Life Sciences - SGGW, Institute of Biology                                             | Poland                                                     |
| Todaro, M. Antonio                 | Associate professor of Zoology                                            | University of Modena and Reggio Emilia                                                                      | Italy                                                      |
| Todd, Jacqui                       | Ecologist                                                                 | The New Zealand Institute for Plant and Food Research                                                       | New Zealand                                                |
| Todd, Mark                         | Meteorologist                                                             | Meteorological Service of New Zealand                                                                       | New Zealand                                                |
| Tognetti, Arnaud                   | Post doc - Behavioural Ecology                                            | Karolinska Institutet                                                                                       | Sweden                                                     |
| Togni, Pedro                       | Professor                                                                 | Universidade de Brasília                                                                                    | Brazil                                                     |
| Toigo, Flavio                      | Emeritus Professor of Condensed Matter Physics                            | Dept. of Physics - University of Padua                                                                      | Italy                                                      |
| Toivonen, Janne M.                 | Associate professor                                                       | University of Zaragoza                                                                                      | Spain                                                      |
| Tokac, Suzan                       | PhD researcher on Cognitive Science                                       |                                                                                                             | Australia                                                  |
| Tokarska-Guzik, Barbara            | professor, biological sciences                                            | Uniwersytet Śląski                                                                                          | Poland                                                     |
| Tokumaru, Rosana Suemi             | Professor                                                                 | Universidade Federal do Espírito Santo                                                                      | Brazil                                                     |
| Tokunaga, Alan                     | Emeritus Astronomer                                                       | University of Hawaii                                                                                        | United States of America (the)                             |
| Tolche, Abebe Debele               | Hydrology/Hydrogeology                                                    | Haramaya University                                                                                         | Ethiopia                                                   |
| Tolhurst, Bryony                   | Senior Lecturer in Behavioural Ecology and Conservation                   | University of Brighton                                                                                      | United Kingdom of Great Britain and Northern Ireland (the) |
| TOLLE, Florian                     | Assistant professor in geography                                          | Université de Bourgogne Franche-Comté                                                                       | France                                                     |
| Tolmos, Maria Laura                | Master student                                                            | University of Göttingen                                                                                     | Germany                                                    |
| Tomad, Walfrido                    | Researcher                                                                | Embrapa Pantanal                                                                                            | Brazil                                                     |
| Tomas, Walfrido                    | Researcher                                                                | Embrapa Pantanal                                                                                            | Brazil                                                     |
| Tomás, Gustavo                     | Scientist, Evolutionary Ecology                                           | Estación Experimental de Zonas Áridas, EEZA - Spanish National Research Council, CSIC                       | Spain                                                      |
| Tomaselli, Alexandra               | Senior Researcher                                                         | Eurac Research                                                                                              | Italy                                                      |
| Tomasevic, Jorge A.                | Research Coordinator                                                      | Rio Cruces Wetlands Center, Universidad Austral de Chile, Valdivia, Chile                                   | Chile                                                      |
| Tomasson, Johannes Bjarki Urbancic | Biologist                                                                 | University of Iceland                                                                                       | Iceland                                                    |
| Tomassone, Laura                   | Researcher                                                                | University of Turin, Dept. of Veterinary Sciences                                                           | Italy                                                      |
| Tomich, Thomas                     | Professor and Director, Agricultural Sustainability Institute / economist | University of California, Davis                                                                             | United States of America (the)                             |



|                                  |                                                                                                                                           |                                                                  |                                                            |
|----------------------------------|-------------------------------------------------------------------------------------------------------------------------------------------|------------------------------------------------------------------|------------------------------------------------------------|
| Tomlinson, Bill                  | Professor of Informatics                                                                                                                  | University of California, Irvine                                 | United States of America (the)                             |
| Tomsic, Jerneja                  | Staff Scientist                                                                                                                           | City of Hope National Medical Center                             | United States of America (the)                             |
| Tonasetto, Federico              | Senior Research Scientist                                                                                                                 | AgResearch                                                       | New Zealand                                                |
| Tonkin, Jonathan                 | Ecology                                                                                                                                   | University of Canterbury                                         | New Zealand                                                |
| Tonnabel, Jeanne                 | Postdoctoral researcher                                                                                                                   | University of Lausanne                                           | Switzerland                                                |
| Tonne, Cathryn                   | Associate Research Professor, Environmental Epidemiology                                                                                  | Barcelona Institute for Global Health                            | Spain                                                      |
| Tonneijck, Femke                 | Programme Head Wetland Carbon, PhD                                                                                                        | Wetlands International                                           | Netherlands (the)                                          |
| Tonoto, Prayoto                  | Environment                                                                                                                               | Riau environment and forestry office                             | Indonesia                                                  |
| Tooke, Amy                       | PhD student                                                                                                                               | University of Sheffield                                          | United Kingdom of Great Britain and Northern Ireland (the) |
| Tookey, Pat                      | Infectious Diseases Epidemiologist                                                                                                        | University College London                                        | United Kingdom of Great Britain and Northern Ireland (the) |
| Topercer, Jano                   | Senior research worker - ecologist                                                                                                        | Comenius University in Bratislava, Botanical Garden at Blatnica  | Slovakia                                                   |
| Topi, Corrado                    | Senior Scientist                                                                                                                          | Stockholm Environment Institute Centre at the University of York | United Kingdom of Great Britain and Northern Ireland (the) |
| Torcini, Alessandro              | Professor of Physics                                                                                                                      | Universite' de Cergy-Pontoise                                    | France                                                     |
| Tordy, Magdalena                 | Environmental Science                                                                                                                     | IIASA                                                            | Austria                                                    |
| Torezan-Silingardi, Helena Maura | Professor of Plant Physiology and Plant Reproductive Biology                                                                              | Universidade Federal de Uberlândia                               | Brazil                                                     |
| Torices, Rubén                   | Lecturer in Ecology                                                                                                                       | King Juan Carlos University                                      | Spain                                                      |
| Tormo, Jaume                     | Profesor Ayudante Doctor. Ecology.                                                                                                        | Universidad de Zaragoza                                          | Spain                                                      |
| Tornero, Irene                   |                                                                                                                                           | Institute of Aquatic Ecology (IEA), Universitat de Girona        | Spain                                                      |
| TORNERO IRANZO, FRANCISCO        | INGENIERO TECNICO FORESTAL                                                                                                                | CONSEJERIA DE DESARROLLO SOSTENIBLE                              | Spain                                                      |
| Törnroos, Anna                   | Asst. Prof.                                                                                                                               | Environmental and Marine Biology, Åbo Akademi University         | Finland                                                    |
| Torquebiau, Emmanuel             | Agroforestry Researcher                                                                                                                   | CIRAD                                                            | France                                                     |
| Torra, Joel                      | researcher                                                                                                                                | University of Lleida                                             | Spain                                                      |
| Torralba-Burrial, Antonio        | Assistant Professor on Didactics of Experimental Sciences / Coordinator of the Area of Environmental Education & Communication at Indurot | Universidad de Oviedo                                            | Spain                                                      |
| Torrao, Filipa                   | Masters Biochemistry                                                                                                                      | EMBL                                                             | Portugal                                                   |
| Torrecilla, Elena                | Scientific Officer                                                                                                                        | Institut de Ciències del Mar (ICM-CSIC)                          | Spain                                                      |
| Torrent, Laura                   | PhD candidate                                                                                                                             | University of Girona                                             | Spain                                                      |
| Torrente-Vilara, Gislene         | Assistant Professor                                                                                                                       | Instituto do Mar/Universidade Federal de São Paulo               | Brazil                                                     |
| Torres, Tomas                    | Full Professor of Organic Chemistry                                                                                                       | Universidad Autonoma de Madrid                                   | Spain                                                      |
| Torres, Rafael                   | Oceanographer - Proffesor                                                                                                                 | Universidad del Norte                                            | Colombia                                                   |
| Torres, beatriz                  | Amazon Environment Senior Specialist                                                                                                      | USAID                                                            | Peru                                                       |
| Torres, Rita                     | Researcher - Biology                                                                                                                      | University of Aveiro                                             | Portugal                                                   |
| Torres, Arturo                   | Retired, former hydrologist with USGS                                                                                                     | USGS                                                             | United States of America (the)                             |

|                                  |                                                                                   |                                                                                  |                                |
|----------------------------------|-----------------------------------------------------------------------------------|----------------------------------------------------------------------------------|--------------------------------|
| TORRES FIGUEROLA, CATALINA MARIA | ASSOCIATE PROFESSOR                                                               | LINCC-UNIVERSITY OF THE BALEARIC ISLANDS                                         | Spain                          |
| Torres Quezada, Isabel           | PhD student                                                                       | Instituto Hispanoluso de Investigaciones Agrarias (CIALE)                        | Spain                          |
| Torres-Porras, Jeronimo          | Professor                                                                         | University of Cordoba                                                            | Spain                          |
| Torres-Ruiz, José M.             | Research Scientist                                                                | INRA                                                                             | France                         |
| Torresani, Loris                 | Ph.D Candidate in Hydrology/natural hazard mitigation                             | Department of Land, Environment, Agriculture and Forestry - University of Padova | Italy                          |
| TORRETTI, CHARLOTTE              | Geopolitics                                                                       | University of Bordeaux Montaigne                                                 | France                         |
| Torricelli, Gian Paolo           | Professor of Urban Geography and Head of OST (Observatory of spatial development) | Università della Svizzera italiana                                               | Switzerland                    |
| Torsani, Fabrizio                | Research fellow                                                                   | Polytechnic University of Marche                                                 | Italy                          |
| Tosi, Maria Chiara               | professor urbanism                                                                | Università Iuav di Venezia                                                       | Italy                          |
| Tosney, Kathryn                  | Professor Emeritas                                                                | University of Miami                                                              | United States of America (the) |
| Tosto, Ambra                     | PhD Candidate                                                                     | Wageningen University & research                                                 | Netherlands (the)              |
| Toth, Sarah                      | Environmental Engineering, PhD                                                    | RMI                                                                              | United States of America (the) |
| Toth, Mate                       | Biologist                                                                         | Institute of Experimental Medicine                                               | Hungary                        |
| Tóth, Zoltán                     |                                                                                   | Hungarian Academy of Sciences                                                    | Hungary                        |
| Tötzke, Christian                | Postdoctoral research fellow                                                      | University of Potsdam                                                            | Germany                        |
| TOUBANOS, Dimitri                | MCFA of Architecture and Urban Planning                                           | ENSA Paris Val-de-Seine                                                          | France                         |
| Toucanne, Sam                    | paleoclimatology                                                                  | Ifremer                                                                          | France                         |
| TOUCHE, Jeanne                   | PhD Student in biogeochemistry                                                    | INRAe                                                                            | France                         |
| Tougeron, Kevin                  | Chargé de Recherches (postdoc)                                                    | Université Catholique de Louvain                                                 | Belgium                        |
| Toukhsati, Samia                 | Senior Lecturer, Psychology                                                       | Federation University Australia                                                  | Australia                      |
| Toulotte, Justine                | PhD in Plant Ecophysiology                                                        | Utrecht University                                                               | Netherlands (the)              |
| Toum, Ezequiel                   | Hydrology                                                                         | IANIGLA-CONICET                                                                  | Argentina                      |
| Touma, Chadi                     | Professor for Behavioural Biology                                                 | University of Osnabrueck                                                         | Germany                        |
| Tourancheau, Bernard             | Professor in Computer Science                                                     | Grenoble-Alps University                                                         | France                         |
| TOURNANT, Pierline               | Ecology                                                                           |                                                                                  | France                         |
| Tournayre, Orianne               | PhD student                                                                       |                                                                                  | France                         |
| TOURNEBIZE, Julien               | Researcher in Soil Hydrology and Ecological Engineering                           | Irstea / UR HYCAR                                                                | France                         |
| TOURNEBIZE, Regis                | Senior Researcher                                                                 | INSERM                                                                           | France                         |
| Toutounji, Hazem                 | Postdoctoral Researcher in Theoretical Neuroscience                               | Institute of Neuroinformatics, University of Zurich and ETH Zurich               | Switzerland                    |
| TOUZARD, jean-Marc               | Director of Research                                                              | INRA                                                                             | France                         |
| Touzé, Cyril                     | Professor, Mechanics and dynamics                                                 | ENSTA Paris                                                                      | France                         |
| Touzot, Laura                    | PhD Student                                                                       | LBBE CNRS                                                                        | France                         |
| Touzot, Gilbert                  | Professor university                                                              | Université numérique nationale française UNIT                                    | France                         |
| Tovela, Erica                    | Researcher                                                                        | Natural History Museum-Maputo                                                    | Mozambique                     |
| Townsend, Sheena                 | Professional Practice Fellow/Conservation Genetics and Evolution                  | University of Otago                                                              | New Zealand                    |

|                            |                                                         |                                                                   |                                                            |
|----------------------------|---------------------------------------------------------|-------------------------------------------------------------------|------------------------------------------------------------|
| Traba, Juan                | Assistant Professor                                     | Universidad Autonoma de Madrid                                    | Spain                                                      |
| Trabant, Peter             | PhD/Oceanographer                                       | Retired                                                           | United States of America (the)                             |
| Traber, Maret              | Professor/Nutrition                                     | Oregon State University                                           | United States of America (the)                             |
| Trabucchi, Michele         | Post-doctoral researcher in Astrophysics                | University of Geneva - Astronomical Observatory                   | Switzerland                                                |
| Tracy, Morgan              | Pollination Ecologist                                   | University of Canterbury                                          | New Zealand                                                |
| Trajce, Aleksander         | PhD Anthropology                                        | PPNEA                                                             | Albania                                                    |
| Tramblay, Yves             | Research scientist                                      | IRD / HydroSciences Montpellier                                   | France                                                     |
| Tranvik, Lars              | Professor, Limnology                                    | Department of Ecology and Genetics, Uppsala University            | Sweden                                                     |
| Trapp, Michael             | Chemist                                                 | private                                                           | Germany                                                    |
| Travaglini, Davide         | Professor of Forest geomatics                           | University of Florence                                            | Italy                                                      |
| Travers, Toby              | PhD candidate                                           | Institute of Marine and Antarctic Studies, University of Tasmania | Australia                                                  |
| Traveset, Anna             | RESEARCH PROFESSOR BIOLOGY                              | SPANISH RESEARCH COUNCIL, CSIC                                    | Spain                                                      |
| Traving, Sachia            | Postdoctoral researcher in Marine Microbiology          | University of British Columbia                                    | Canada                                                     |
| Traylor, Daniel            | Post Doctoral Fellow Exercise Metabolism Research Group | McMaster University                                               | Canada                                                     |
| Traylor, Wolfgang          | PhD student                                             | Senckenberg Biodiversity and Climate Research Centre Frankfurt    | Germany                                                    |
| Treagus, Samantha          | PhD scientist, Biological water pollution (viruses)     | University of Exeter                                              | United Kingdom of Great Britain and Northern Ireland (the) |
| Treharne, Kate             | Horticultural therapy                                   | Dundee City Council                                               | United Kingdom of Great Britain and Northern Ireland (the) |
| Treich, Nicolas            | Research associate                                      | Toulouse School of Economics and INRA                             | France                                                     |
| Treichler, Désirée         | PostDoc, Cryosphere Sciences/Remote Sensing             | Department of Geosciences, University of Oslo                     | Norway                                                     |
| Tremblay, Emy              | Master student in paleoecology                          | Université du Québec à Chicoutimi                                 | Canada                                                     |
| Tremoleda, Imma            | psychology                                              | Education                                                         | Spain                                                      |
| Trencher, Gregory          | Associate Professor                                     | Kyoto University                                                  | Japan                                                      |
| Tress, Michael             | Staff scientist                                         | Spanish National Cancer Research Centre (CNIO)                    | Macao                                                      |
| Treurnicht, Martina Fynbos | Postdoctoral Researcher                                 | Stellenbosch University                                           | South Africa                                               |
| Trevathan-Tackett, Stacey  | Postdoctoral Fellow                                     | Deakin University                                                 | Australia                                                  |
| Trevino, Marcela           | Biology Professor                                       | Florida Southwestern State College                                | United States of America (the)                             |
| Triana-Moreno, Luz Amparo  | Associate Professor / Botanist                          | Universidad de Caldas                                             | Colombia                                                   |
| Tribollet, Aline           | Marine Ecologist - Researcher                           | Institut de Recherche pour le Développement                       | France                                                     |
| tribot, sandra             | Botanic                                                 | Conservatoire et Jardin botanique de la ville de Genève           | Switzerland                                                |
| Tricault, Yann             | Lecturer in Applied Ecology and Plant Protection        | Agrocampus Ouest                                                  | France                                                     |
| Trick, Charles             | Professor Emeritus                                      | Western University                                                | Canada                                                     |
| Trigo, Dolores             | Associate Professor                                     | Univeristy Complutense of Madrid                                  | Spain                                                      |
| Triguero-Ocaña, Roxana     | PhD student - Epidemiology                              | Instituto de Investigación en Recursos Cinegéticos                | Spain                                                      |
| Trillo, Paula Alejandra    | Assistant Professor of Biology                          | Gettysburg College                                                | United States of America (the)                             |
| Trimmel, Gregor            | University Professor / Materials Chemistry              | Graz University of Technology                                     | Austria                                                    |

|                                       |                                                                                                                    |                                                            |                                                            |
|---------------------------------------|--------------------------------------------------------------------------------------------------------------------|------------------------------------------------------------|------------------------------------------------------------|
| Tripathi, Amarnath                    | Associate Professor of Economics                                                                                   | Sharda University                                          | India                                                      |
| TRIPEPI, Sandro                       | Full professor Zoology                                                                                             | Calabria University                                        | Italy                                                      |
| Tripoli, Vicki                        | Environmental scientist                                                                                            | Retired                                                    | United States of America (the)                             |
| Triviño, María                        | Postdoctoral Researcher                                                                                            | University of Jyväskylä                                    | Finland                                                    |
| Troeschel, Martin                     | R&D Group Leader, Computer Science                                                                                 | OFFIS - Institute for Information Technology, Oldenburg    | Germany                                                    |
| Troia, Angelo                         | Researcher in Botany                                                                                               | University of Palermo, Dept. STEBICEF                      | Italy                                                      |
| Troia, Marion                         | retired lecturer                                                                                                   | Hanze University of Applied Sciences                       | Netherlands (the)                                          |
| Trollip, Hilton                       | Senior Researcher - Associate                                                                                      | Energy Research Centre, University of Cape Town            | South Africa                                               |
| Trommsdorff, Max                      | Head of Group Agrivoltaics                                                                                         | Fraunhofer Institute for Solar Energy Systems ISE          | Germany                                                    |
| Troscianko, Jolyon                    | Research Fellow                                                                                                    | University of Exeter                                       | United Kingdom of Great Britain and Northern Ireland (the) |
| Trott, Dr. Gary R                     | Physicist                                                                                                          | Retired                                                    | United States of America (the)                             |
| Troughton, John                       | Plant Physiology                                                                                                   | Retired                                                    | Australia                                                  |
| Trouillier, Mario                     | Forest Ecologist                                                                                                   | University of Greifswald                                   | Germany                                                    |
| Trouillon, Julian                     | Microbiology                                                                                                       | Grenoble Alpes University                                  | France                                                     |
| Trower, Peter                         | Retired professor of clinical psychology but still active researcher                                               | University of Birmingham, UK                               | United Kingdom of Great Britain and Northern Ireland (the) |
| Trower, Hayley                        | PhD psychology                                                                                                     | University of Warwick                                      | United Kingdom of Great Britain and Northern Ireland (the) |
| Trueba, Santiago                      | Postdoctoral Reserarcher, Ecology                                                                                  | Yale University                                            | United States of America (the)                             |
| Trujillo, Rony                        | Biologist                                                                                                          | Universidad de San Carlos de Guatemala                     | Guatemala                                                  |
| Tsai, Yi-Chien Vita                   | Professional Teaching Fellow, Faculty of Science                                                                   | The University of Auckland                                 | New Zealand                                                |
| Tsai, Fujung                          | associate professor                                                                                                | National Taiwan Ocean University                           | Taiwan                                                     |
| Tsakalakis, Ioannis                   | Post Doc                                                                                                           | Marine Biological Laboratory, Woods Hole                   | United States of America (the)                             |
| Tsalaporta, Eleni                     | Lecturer, Chemical Engineering                                                                                     | University College Cork                                    | Ireland                                                    |
| Tsalyuk, Miriam                       | Postdoctoral researcher, wildlife ecology                                                                          | Hebrew university of Jerusalem                             | Israel                                                     |
| Tscharntke, Teja                      | Professor for Agroecology                                                                                          | University of Göttingen                                    | Germany                                                    |
| Tschigg, Katharina                    | Junior Researcher                                                                                                  | EURAC Research                                             | Italy                                                      |
| Tschöpe, Okka                         | Biologist                                                                                                          | Botanical Garden and Boatnical Museum Berlin               | Germany                                                    |
| Tschöpe, Onno                         | MD                                                                                                                 | Dinan hospital                                             | France                                                     |
| Tschopp, Maurice                      | Post Doc Researcher - Geography and sustainable development                                                        | Centre for development and environment, University of Bern | Switzerland                                                |
| Tseng, Ashley                         | Master of Public Health in Epidemiology Candidate                                                                  | Columbia University                                        | United States of America (the)                             |
| Tsigaris, Panagiotis                  | Professor                                                                                                          | Thompson Rivers University                                 | Canada                                                     |
| Tsogetsaikhan Dursahinhan, Altangerel | Assistant Curator at Manter Laboratory of Parasitology, University of Nebraska-Lincoln State Museum, PhD candidate | University of Nebraska-Lincoln                             | United States of America (the)                             |
| Tsougras, Costas                      | Associate Professor                                                                                                | Aristotle University of Thessaloniki                       | Greece                                                     |
| Tsuji, Jun                            | Assistant Dean, STEM Division                                                                                      | Siena Heights University                                   | United States of America (the)                             |
| Tuano, Philip                         | Assistant Professor, Economics Department                                                                          | Ateneo de Manila University                                | Philippines (the)                                          |
| Tuchman, Nancy                        | Dean, Environmental Science and Ecology                                                                            | Loyola University Chicago                                  | United States of America (the)                             |

|                       |                                                                    |                                                              |                                                            |
|-----------------------|--------------------------------------------------------------------|--------------------------------------------------------------|------------------------------------------------------------|
| Tuchman, nancy        | Professor and Dean Environmental Science                           | Loyola University Chicago                                    | United States of America (the)                             |
| Tuffin, Ashley        | Research Assistant in Molecular Biology                            | John Innes Centre                                            | United Kingdom of Great Britain and Northern Ireland (the) |
| Tuleubekov, Assyl     | Associate Professor                                                | International Information Technologies University            | Kazakhstan                                                 |
| TUMENTA, Pricelia     | Senior Lecturer, Wildlife Ecology and Conservation                 | University of Dschang                                        | Cameroon                                                   |
| Tunon, Håkan          | Senior Research Officer                                            | Swedish Biodiversity Centre                                  | Sweden                                                     |
| Tuomisto, Hanna       | Professor                                                          | University of Turku                                          | Finland                                                    |
| Tura, Pedro           | PhD Oceanography                                                   | Oceanographic Institution - University of São Pulo           | Brazil                                                     |
| Turiégano, Enrique    | Senior Lecturer, Biology                                           | Universidad Autónoma de Madrid                               | Spain                                                      |
| Türkmen, Ant          | Marine Biologist                                                   | Ecological Research Society                                  | Turkey                                                     |
| Turley, Nash          | Postdoctoral fellow in ecology                                     | University of Central Florida                                | United States of America (the)                             |
| Turnbull, Matthew     | Professor and Head of the School of Biological Sciences            | University of Canterbury                                     | New Zealand                                                |
| Turnbull, Lindsay     | Plant Ecologist                                                    | University of Oxford                                         | United Kingdom of Great Britain and Northern Ireland (the) |
| Turner, Andrew        | Restoration Ecologist                                              | CapeNature                                                   | South Africa                                               |
| Turner, Daniel        | PhD student Ecology                                                | University of Southampton                                    | United Kingdom of Great Britain and Northern Ireland (the) |
| Turner, Jake          | Research associate, Astrophysics                                   | Cornell University                                           | United States of America (the)                             |
| Turner, James         | Postdoctoral Research Fellow, wildlife ecophysiology               | Charles Sturt University                                     | Australia                                                  |
| Turner, Anna          | PhD candidate                                                      | Charles Sturt University                                     | Australia                                                  |
| Turner, Lucy          | Lecturer in Marine Biology                                         | University of Plymouth                                       | United Kingdom of Great Britain and Northern Ireland (the) |
| Turner, Rolf          | Statistician (retired; Honorary Research Fellow).                  | University of Auckland                                       | New Zealand                                                |
| Turney, Chris         | Professor of Climate Change and Earth Science                      | University of New South Wales                                | Australia                                                  |
| Turon, Xavier         | Research Professor / Marine Ecology                                | Spanish Research Council (CSIC)                              | Spain                                                      |
| Turrent, Cuauhtemoc   | Researcher, Physical Oceanography                                  | CICESE                                                       | Mexico                                                     |
| Turton, Anthony       | Professor                                                          | Centre for Environmental Management University of Free State | South Africa                                               |
| Tuthill, Cynthia      | Biochemist/Chief Scientific Officer for pharmaceutical development | Retired from SciClone Pharmaceuticals, Inc.                  | United States of America (the)                             |
| Tuzun, Nedim          | Postdoc, Ecology & Evolution                                       |                                                              | Liechtenstein                                              |
| Twardochleb, Laura    | PhD Candidate, Freshwater Ecology                                  | Michigan State University                                    | United States of America (the)                             |
| Twiggs, Matthew       | Senior Conservation Officer                                        | Barn Owl Trust                                               | United Kingdom of Great Britain and Northern Ireland (the) |
| Twining, Joshua Peter | PhD in Ecology                                                     | Queen's University, Belfast                                  | United Kingdom of Great Britain and Northern Ireland (the) |
| Twiss, Sean           | Associate Professor in Behavioural Ecology                         | Durham University                                            | United Kingdom of Great Britain and Northern Ireland (the) |
| Tylianakis, Jason     | Professor of Ecology                                               | University of Canterbury                                     | New Zealand                                                |
| Tyne, Julian          | Marine Ecologist                                                   | Murdoch University                                           | Australia                                                  |
| Tyszka, Stephane      |                                                                    | NUCLIO - Núcleo Interactivo de Astronomia                    | Portugal                                                   |

|                          |                                                                   |                                                                                  |                                                            |
|--------------------------|-------------------------------------------------------------------|----------------------------------------------------------------------------------|------------------------------------------------------------|
| Tyteca, Daniel           | Professor Emeritus, Biodiversity Research Centre                  | Université catholique de Louvain (UCLouvain)                                     | Belgium                                                    |
| Tzanatos, Evangelos      | Assistant Professor in Marine Ecology-Fisheries Management        | University of Patras                                                             | Greece                                                     |
| Tzanetou, Katerina       | Applied physics                                                   | National Technical University of Athens                                          | Greece                                                     |
| Tzscheuschler, Peter     | Senior Researcher                                                 | Technical University of Munich, Department for Energy and Process Engineering    | Germany                                                    |
| U' Ren, Alfred           | Full professor                                                    | UNAM                                                                             | Mexico                                                     |
| Ubaid, Flávio Kulaif     | Adjunct Professor, Ecology                                        | Universidade Estadual do Maranhão (UEMA)                                         | Brazil                                                     |
| Uber, Magdalena          | Doctoral Candidate                                                | Institute for Geosciences and Environmental research / Université Grenoble Alpes | France                                                     |
| Udaloy, Anne             | Hydrogeologist                                                    | Udaloy Environmental Consulting                                                  | United States of America (the)                             |
| Udayar Pillai, Surendran | Senior Scientist                                                  | Centre for Water Resources Development and Management                            | India                                                      |
| Udino, Eve               | PhD candidate                                                     | Deakin University                                                                | Australia                                                  |
| Udy, James               | Adjunct Professor / Marine Scientist /Director Science Under Sail | QUT and Science Under Sail                                                       | Australia                                                  |
| Ueckert, Christian       | Research Engineer                                                 | German Aerospace Center (DLR)                                                    | Germany                                                    |
| Uehara, Thiago H. K.     | Research Fellow                                                   | Imperial College London                                                          | United Kingdom of Great Britain and Northern Ireland (the) |
| Uhl, Michael             | Bioinformatics                                                    | University of Freiburg                                                           | Germany                                                    |
| Uhl, Britta              | M. Sc. Biol, PhD-Student                                          | University of Vienna                                                             | Austria                                                    |
| Uhl, Philipp             | PhD student                                                       | University of Koblenz-Landau                                                     | Germany                                                    |
| Uhrin, Marcel            | associate professor / ecology, zoology                            | Faculty of Science, P. J. Šafárik University in Košice                           | Slovakia                                                   |
| Uilhoorn, Anne           | PhD in Vegetation Ecology                                         | Leiden University                                                                | Netherlands (the)                                          |
| Ukens, Sophia            | Medicine                                                          | Westfälische Wilhelmsuniversität Münster                                         | Germany                                                    |
| Ulimboka, Rehema         | Assistant Lecturer                                                | University of Dodoma                                                             | Tanzania, United Republic of                               |
| Ullah, Manzoor           | Professor                                                         | HED                                                                              | Pakistan                                                   |
| Ullah, Raza              | Research assistant                                                | Masters student                                                                  | Pakistan                                                   |
| Ullrich, Susann          | Biologist in Environmental Psychology                             | Institute of Advanced Sustainability Studies (IASS) Potsdam                      | Germany                                                    |
| Ullrich, Jessica         | Professor for Aesthetics and Art History                          | University of the Arts Münster                                                   | Germany                                                    |
| Ullrich-Lueter, Esther   | Postdoc/Evolutionary Biology                                      | Museum fuer Naturkunde Berlin (Natural History Museum Berlin)                    | Germany                                                    |
| Ulman, Aylin             | Marine biologist                                                  | Mersea Marine Consulting                                                         | Turkey                                                     |
| Ulrich, Yuko             | Research Fellow                                                   | University of Lausanne                                                           | Switzerland                                                |
| Ulrici, Alessandro       | Associate Professor of Analytical Chemistry - Chemometrics        | University of Modena and Reggio Emilia                                           | Italy                                                      |
| Uludag, Ahmet            | Professor on weed science                                         | Plant Protection Dep. Faculty of Agriculture, Canakkale Onsekiz Mart University  | Turkey                                                     |
| Umapathy, Govindhaswamy  | scientist                                                         | CSIR- Centre for Cellular and Molecular Biology                                  | India                                                      |
| Umar, Muhammad           | Research Scientist                                                | Norwegian Institute for Water Research                                           | Norway                                                     |
| Umerez, Jon              | University researcher & lecturer / Philosophy of Biology          | University of the Basque Country (UPV/EHU)                                       | Spain                                                      |

|                               |                                                        |                                                                                           |                                                            |
|-------------------------------|--------------------------------------------------------|-------------------------------------------------------------------------------------------|------------------------------------------------------------|
| Unsworth, Richard             | Lecturer                                               | Swansea University                                                                        | United Kingdom of Great Britain and Northern Ireland (the) |
| Untersteiner, Dr. Hubert      | Ecotoxicologist / Biologist                            |                                                                                           | Austria                                                    |
| Uomini, Natalie               | Senior Scientist                                       | Max Planck Institute for the Science of Human History                                     | Germany                                                    |
| Upham, Nathan                 | Assistant Professor, School of Life Sciences           | Arizona State University                                                                  | United States of America (the)                             |
| UPTON, Murray                 | Entomologist (retired)                                 | CSIRO                                                                                     | Australia                                                  |
| Urban, Alan                   | Entomology                                             | N/A                                                                                       | South Africa                                               |
| Urban, Jan                    | Researcher, Environmental psychology                   | Charles University Environment Center                                                     | Czech Republic (the)                                       |
| Urbanetz, Catia               | Researcher/Plant Ecology                               | Embrapa Pantanal                                                                          | Brazil                                                     |
| Urbano-Bonilla, Alexander     | Investigador                                           | Pontificia Universidad Javeriana, Bogotá D.C                                              | Colombia                                                   |
| Urbat, Stefan                 | physicist                                              |                                                                                           | Germany                                                    |
| Urbez-Torres, Jose Ramon      | Research Scientist / Plant Pathology                   | Agriculture and Agri-Food Canada                                                          | Canada                                                     |
| Urdampilleta, Constanza María | Biology                                                | UBA                                                                                       | Argentina                                                  |
| Urgeles, Roger                | Principal scientist                                    | Institute of Marine Sciences                                                              | Spain                                                      |
| Uria, Jaime                   | Post Doc - Plant Ecology                               | Swedish Agricultural University                                                           | Sweden                                                     |
| URIEN, Charlotte              | Biology                                                |                                                                                           | France                                                     |
| Urmee, Tania                  | Professor                                              | Murdoch University                                                                        | Australia                                                  |
| Urmetzer, Sophie              | Transition and innovation researcher                   | University of Hohenheim                                                                   | Germany                                                    |
| Uroy, Léa                     | PhD student in Ecology                                 | University of Rennes                                                                      | France                                                     |
| Urrego, Dunia H.              | Senior Lecturer Physical Geography                     | University of Exeter                                                                      | United Kingdom of Great Britain and Northern Ireland (the) |
| Urrego, Ligia E               | Professor                                              | Universidad Nacional de Colombia - Sede Medellín                                          | Colombia                                                   |
| URRUTY, Benoît                | PhD in glaciology                                      | Université Grenoble Alpes / Institut des géosciences et de l'environnement                | France                                                     |
| Utsumi, Daniel                | PhD student                                            | Universidade federal de são Paulo - unifesp                                               | Brazil                                                     |
| Utz, Nadine                   | Managing Director                                      | German BioImaging - Society for Microscopy and Image Analysis, c/o University of Konstanz | Germany                                                    |
| Üveges, Bálint                | research fellow - evolutionary ecology and herpetology | Hungarian Academy of Sciences                                                             | Hungary                                                    |
| Uzu, Gaëlle                   | Resarcher in Atmospheric Geochemistry                  | IGE- Institute of Environmental Geosciences                                               | France                                                     |
| Vaccari, Davide               | Junior Researcher                                      | Fondazione Eni Enrico Mattei                                                              | Italy                                                      |
| Vacchiano, Giorgio            | Assistant professor in forest management and planning  | University of Milan, DISAA                                                                | Italy                                                      |
| Vachaud, Georges              | Emeritus Senior Scientist                              | CNRS- French National Reserach Council                                                    | France                                                     |
| Vache, Marian                 | PostDoc, Biophysics                                    | Institute of Physical Chemistry, University of Göttingen                                  | Germany                                                    |
| Vad, Csaba                    | researcher/ecologist                                   | MTA Centre for Ecological Research                                                        | Hungary                                                    |
| Vadén, Tere                   | Researcher                                             | BIOS Research Unit                                                                        | Finland                                                    |
| Vadineanu, Angheluta          | University Proffesor                                   | University of Bucharest                                                                   | Romania                                                    |
| Vafae Eslahi, Aida            | PhD student                                            | University of Tarbiat modares                                                             | Iran (Islamic Republic of)                                 |
| Vágner, Lukáš                 | scientist                                              | Czech Globe                                                                               | Czech Republic (the)                                       |
| Vail, David                   | Adams Catlin Professor of Economics emeritus           | Bowdoin College                                                                           | United States of America (the)                             |

|                            |                                                          |                                                                                                                    |                                                            |
|----------------------------|----------------------------------------------------------|--------------------------------------------------------------------------------------------------------------------|------------------------------------------------------------|
| Vainio, Henna              | doctoral student                                         | University of Jyväskylä                                                                                            | Finland                                                    |
| Vaissière, Anne-Charlotte  | Researcher - Economics, interdisciplinarity with ecology | CNRS - Laboratory Ecology, Systematics, Evolution, University Paris-Saclay                                         | France                                                     |
| Vaizel Ohayon, Dalit       | Microbiologist                                           | Mekorot                                                                                                            | Israel                                                     |
| Vajdic, Claire             | Unit Head, Cancer Epidemiology                           | University of New South Wales                                                                                      | Australia                                                  |
| Val, Adalberto (Dal)       | Researcher                                               | INPA - Brazilian National Institute for Research of the Amazon                                                     | Brazil                                                     |
| Valadares Barroso, Gustavo | Postdoctoral researcher                                  | UCLA                                                                                                               | United States of America (the)                             |
| Valade, Aude               | Environmental science                                    | Creaf                                                                                                              | Spain                                                      |
| Valand, Karishma           | Cancer Biology                                           | Francis Crick                                                                                                      | United Kingdom of Great Britain and Northern Ireland (the) |
| Valavanis, Vasilis         | Research Scientist                                       | Hellenic Center for Marine Research                                                                                | Greece                                                     |
| Valckenborgh, Frank        | Lecturer in Mathematics                                  | Macquarie University                                                                                               | Australia                                                  |
| Valdecantos, Soledad       | Professor-Researcher                                     | IBIGEO                                                                                                             | Argentina                                                  |
| Valdez, Ursula             | Teaching Faculty Env, Science                            | University of Washington Bothell                                                                                   | United States of America (the)                             |
| Valdivia, Sonia            | Programme Manager                                        | WRF                                                                                                                | Switzerland                                                |
| Valdivia, Nelson           | Associate Profesor                                       | Universidad Austral de Chile                                                                                       | Chile                                                      |
| Valdivia Acosta, Jorge     | Electricity Engineering / Renewable Energy               |                                                                                                                    | Chile                                                      |
| Valdivielso, Joaquin       | Associate Professor in Moral Philosophy                  | University of the Balearic Islands                                                                                 | Spain                                                      |
| Vale, Cândida G            | Researcher                                               | CIIMAR - Interdisciplinary Centre of Marine and Environmental Research of the University of Porto                  | Portugal                                                   |
| Vale, Maria                | Marine Biology                                           |                                                                                                                    | Portugal                                                   |
| Vale, Pedro                | Lecturer, Evolutionary Ecology                           | University of Edinburgh                                                                                            | United Kingdom of Great Britain and Northern Ireland (the) |
| Vale Asari, Natalia        | Astrophysics                                             |                                                                                                                    | Brazil                                                     |
| VALEIX, Marion             | Researcher in Ecology                                    | CNRS                                                                                                               | France                                                     |
| Valente, João              | University Lecturer & Researcher                         | Wageningen University & Research                                                                                   | Netherlands (the)                                          |
| Valente, Antonio           | Researcher                                               | IMDEA Energy                                                                                                       | Spain                                                      |
| Valente-Neto, Francisco    |                                                          | Universidade Federal de Mato Grosso do Sul                                                                         | Brazil                                                     |
| Valentim, Gabriela         | MSc Student in Ecology and Conservation                  | Universidade Federal do Paraná                                                                                     | Brazil                                                     |
| Valentine, Leonie          | Research Fellow                                          | University of Western Australia                                                                                    | Australia                                                  |
| Valenzuela, Silvia         | Profesor                                                 | UNMSM                                                                                                              | Peru                                                       |
| Valenzuela Galvan, David   | Profesor e Investigador                                  | Centro de Investigación en Biodiversidad y Conservación (CIByC) Universidad Autónoma del Estado de Morelos (UAEM). | Mexico                                                     |
| Valenzuela-Lamas, Silvia   | Researcher - Archaeology                                 | Consejo Superior de Investigaciones Científicas                                                                    | Spain                                                      |
| Valera, Francisco          | Permanent Researcher/ Evolutionary Ecologist             | Consejo Superior de Investigaciones Científicas                                                                    | Spain                                                      |
| Valérie, Vergé             | Ingineer cell biology                                    | Sorbonne University                                                                                                | France                                                     |
| Valérie, VERNEAUX          | Lecturer in Freshwater Ecology                           | University of Franche-Comté Labor Chrono-Environment (UMR 6249)                                                    | France                                                     |
| Valerio, Francesco         | PhD fellowship                                           | CIBIO - INBIO                                                                                                      | Portugal                                                   |
| Valerio, Alejandro A.      | Entomologist                                             | CIBRC                                                                                                              | Costa Rica                                                 |



|                             |                                                           |                                                               |                                                            |
|-----------------------------|-----------------------------------------------------------|---------------------------------------------------------------|------------------------------------------------------------|
| Valido, Alfredo             | Researcher                                                | Instituto de Productos Naturales y Agrobiología (IPNA-CSIC)   | Spain                                                      |
| Valiente-Banuet, Alfonso    | Tenured Research Ecologist                                | Institute of Ecology, Universidad Nacional Autónoma de Mexico | Mexico                                                     |
| Valkó, Orsolya              | research group leader / ecologist                         | MTA-DE Lendület Seed Ecology Research GRoup                   | Hungary                                                    |
| Valkonen, Tuomo             | Academy of Finland Research Fellow, Mathematics           | University of Helsinki                                        | Finland                                                    |
| Valladares, Fernando        | Research Professor                                        | CSIC                                                          | Spain                                                      |
| Valles, Henri               | Lecturer in Ecology                                       | The University of the West Indies at Cave Hill                | Barbados                                                   |
| Valletta, John Joseph       | Research Fellow                                           | University of Exeter                                          | United Kingdom of Great Britain and Northern Ireland (the) |
| Vallino, Joseph             | Senior Scientist, Biogeochemistry                         | Marine Biological Laboratory                                  | United States of America (the)                             |
| Vallyon, Lolita             |                                                           | University of Waikato                                         | New Zealand                                                |
| Valpuesta, José M.          | Professor in Structural Biology                           | Consejo Superior de Investigaciones Científicas               | Spain                                                      |
| Valsecchi, João             | Director                                                  | Mamirauá Sustainable Development Institute (IDSM)             | Brazil                                                     |
| Valsecchi, Sara             | Senior Research/Biologist                                 | Water Research Institute- National Research Council of Italy  | Italy                                                      |
| Valvin, Pierre              | Research Engineer, Physics                                | CNRS / L2C Montpellier                                        | France                                                     |
| van As, Dirk                | Senior researcher                                         | GEUS                                                          | Denmark                                                    |
| Van Belle, Sarie            | Postdoctoral Research Associate/Animal Behavioral Ecology | University of Texas at Austin                                 | United States of America (the)                             |
| van Belzen, Jim             | Ecology                                                   | Netherlands Institute for Sea Research                        | Netherlands (the)                                          |
| van Bemmelen, Rob           | PhD candidate                                             | Wageningen Marine Research                                    | Netherlands (the)                                          |
| van Bergeijk, Stef          | Postdoctoral Researcher Estuarine Ecology                 | IFAPA Centro El Toruño                                        | Spain                                                      |
| van Bijsterveldt, Celine    | PhD student                                               | Royal Netherlands Institute for Sea Research (NIOZ)           | Netherlands (the)                                          |
| Van Boxel, John H.          | Meteorology and climatology                               | University of Amsterdam                                       | Netherlands (the)                                          |
| van Brakel, Martin          | Independent consultant, water resources & fisheries       |                                                               | Netherlands (the)                                          |
| Van Coppenolle, Rebecca     | Coastal Modeller Analyst                                  | University of Antwerp                                         | Belgium                                                    |
| Van Daele, Paul             | Biologist/Director                                        | Bird Protection Flanders                                      | Belgium                                                    |
| Van Daele, Frederik         | Biology/Phd candidate researcher                          | KU Leuven                                                     | Belgium                                                    |
| van Dam, Annemieke          | PhD candidate Chemistry                                   | Wageningen University                                         | Netherlands (the)                                          |
| Van de Crommenacker, Janske | Postdoc                                                   | University of Groningen                                       | Netherlands (the)                                          |
| van de Giesen, Nick         | Professor Water Resources Engineering                     | Delft University of Technology, The Netherlands               | Netherlands (the)                                          |
| Van de Perre, Frederik      | PhD student                                               | University of Antwerp                                         | Belgium                                                    |
| Van de Velde, Jorn          | PhD Student in Hydrology                                  | Ghent University                                              | Belgium                                                    |
| van de Ven, Dirk-Jan        | Postdoc Researcher, Economics                             | Basque Center for Climate Change                              | Spain                                                      |
| Van de Vijver, Ruben        | Postdoctoral researcher chemical engineering              | Ghent University                                              | Belgium                                                    |
| Van de Voorde, Jonas        | Science communication                                     | Royal Museum for Central Africa                               | Belgium                                                    |
| van de Waal, Erica          | Primateology                                              | University of Lausanne                                        | Switzerland                                                |
| van den Berg, Eduardo       | Full Professor                                            | Universidade Federal de Lavras                                | Brazil                                                     |
| van den Berg, Cassio        | Full Professor - Plant Systematics                        | Universidade Estadual de Feira de Santana                     | Brazil                                                     |
| van den Berg, Rob D.        | Professor                                                 | King's College London                                         | Netherlands (the)                                          |

|                            |                                                               |                                                              |                                                            |
|----------------------------|---------------------------------------------------------------|--------------------------------------------------------------|------------------------------------------------------------|
| Van Den Berge, Sanne       | PhD student                                                   | ForNaLab, Department of Environment, Ghent University        | Belgium                                                    |
| van den Bogaard, Samira    | Doctoral candidate in Computational Biotechnology             | institute of Applied Microbiology, RWTH Aachen University    | Germany                                                    |
| van den Boogaart, Paul     | (micro)biologist                                              |                                                              | Netherlands (the)                                          |
| Van den Bosch, Merijn      | Ecologist                                                     | Ghent University                                             | Belgium                                                    |
| van den Brink, Liesbeth    | PhD candidate                                                 | Plantecology, University Tuebingen                           | Germany                                                    |
| Van den Brink, Valentijn   | Biology                                                       |                                                              | Netherlands (the)                                          |
| Van den Broeck, Maarten    |                                                               | KU Leuven                                                    | Belgium                                                    |
| Van den Broeck, Andreas    | lichenology                                                   | Botanic Garden Meise                                         | Belgium                                                    |
| van den Hout, Piet J.      | Biologist                                                     |                                                              | Netherlands (the)                                          |
| Van den Wyngaert, Silke    | Researcher in aquatic biology                                 | IGB Berlin                                                   | Germany                                                    |
| van der Aart, Lizah        | Postdoctoral researcher, Molecular Biology                    | Newcastle university                                         | United Kingdom of Great Britain and Northern Ireland (the) |
| van der Geer, Alexandra    | Researcher                                                    | Naturalis Biodiversity Center                                | Netherlands (the)                                          |
| van der Heijden, Geertje   | Assistant Professor in Tropical Ecology                       | University of Nottingham                                     | United Kingdom of Great Britain and Northern Ireland (the) |
| van der Jagt, Richard      | Adjunct Professor of Medicine                                 | U of Ottawa                                                  | Canada                                                     |
| van der Kamp, Marije       | Biology-Neuroscience                                          |                                                              | Netherlands (the)                                          |
| van der Kooi, Casper J.    | PostDoc                                                       | University of Groningen                                      | Netherlands (the)                                          |
| van der Lans, Hans         | Biology Ecology                                               | Director of Ecoplan Natuurontwikkeling                       | Netherlands (the)                                          |
| van der Lee, Robin         | Postdoctoral Fellow                                           | The University of British Columbia                           | Canada                                                     |
| van der Made, Jan          | researcher / paleontologist                                   | Consejo Superior de Investigaciones Cientificas              | Spain                                                      |
| van der Meer, Jan Roelof   | Professor in Microbiology                                     | University of Lausanne                                       | Switzerland                                                |
| van der Meer, Yvonne       | Associate Professor Sustainability of Chemicals and Materials | Maastricht University                                        | Netherlands (the)                                          |
| van der Merwe, Stephni     | PhD student                                                   | University of Capet Town                                     | South Africa                                               |
| van der Merwe, Gottlieb    | Systems Engineer Radio Astronomy                              | SARAO                                                        | South Africa                                               |
| van der Plas, Alfons       | postdoctoral researcher, ecology                              | University of Leipzig                                        | Germany                                                    |
| van der Pouw Kraan, Tineke | researcher                                                    | free university medical center                               | Netherlands (the)                                          |
| van der Reijden, Karin     | PhD-student Marine Ecology                                    | University of Groningen                                      | Netherlands (the)                                          |
| van der Sluis, Theo        | Landscape ecologist                                           | Wageningen Environmental Research                            | Netherlands (the)                                          |
| van der Strate, Barry      | Head Research Office                                          | Univeristy of Groningen, University Medical Center Groningen | Netherlands (the)                                          |
| van der Valk, Jan          | postdoctoral researcher, anthropology                         | University of Vienna                                         | Belgium                                                    |
| van der Wateren, Dick      | Retired Earth scientist                                       | Vrije Universiteit Amsterdam                                 | Netherlands (the)                                          |
| van der Werf, Hayo         | researcher                                                    | INRA                                                         | France                                                     |
| van der Zwan, Wiewa        | Ecologist                                                     |                                                              | New Zealand                                                |
| Van Die, Irma              | Associate Professor, biochemistry                             | VU University Medical Center Amsterdam                       | Netherlands (the)                                          |
| van Dijk, Marc             | Biomolecular sciences                                         | Vrije Universiteit Amsterdam                                 | Netherlands (the)                                          |
| van Dis, Natalie           | PhD Candidate Evolutionary Biology                            | NIOO-KNAW                                                    | Netherlands (the)                                          |
| Van Dongen, Stefan         | professor biology and biostatistics                           | Antwerp University                                           | Belgium                                                    |

|                                     |                                                     |                                                                                  |                                                            |
|-------------------------------------|-----------------------------------------------------|----------------------------------------------------------------------------------|------------------------------------------------------------|
| Van Dooren, Tom JM                  | CNRS researcher Evolutionary Ecology                | Sorbonne University Paris                                                        | France                                                     |
| van Doorn, G. Sander                | Assistant professor, evolutionary systems biology   | University of Groningen                                                          | Netherlands (the)                                          |
| Van Echelpoel, Wout                 | PhD Candidate                                       | Ghent University                                                                 | Belgium                                                    |
| van Eeden, Lily                     | PhD student in biodiversity conservation            | The University of Sydney                                                         | Australia                                                  |
| van Eldijk, Timo J. B.              | Phd-candidate evolutionary biology                  | Groningen university                                                             | Netherlands (the)                                          |
| van Elsas, Jan Dirk                 | Professor, Microbial Ecology                        | University of Groningen                                                          | Netherlands (the)                                          |
| van Gent, Paul                      | PhD Researcher / Lecturer                           | Delft University of Technology                                                   | Netherlands (the)                                          |
| van Ginkel, Annelies                | PhD-Student Conservation Biology                    | University of Groningen                                                          | Netherlands (the)                                          |
| van Harskamp, Michiel               | PhD Student / Science Education                     | Freudenthal Institute / Utrecht University                                       | Netherlands (the)                                          |
| van Heezik, Yolanda                 | Associate Professor                                 | University of Otago                                                              | New Zealand                                                |
| van Herwerden, Lynne                | Senior Lecturer, College of Science and Engineering | James Cook University                                                            | Australia                                                  |
| van hiel, boris                     | postdoc                                             | KULeuven                                                                         | Belgium                                                    |
| Van Hooreweghe, Floor               | Ecology, Evolution and Biodiversity Conservation    | KU Leuven                                                                        | Belgium                                                    |
| van Kampenhout, Leo                 | PhD candidate (glaciology)                          | Institute for Marine and Atmospheric research Utrecht (IMAU), Utrecht University | Netherlands (the)                                          |
| van Kerkwijk, Marten                | Professor of Astronomy                              | University of Toronto                                                            | Canada                                                     |
| van Kleunen, Mark                   | Professor of Ecology                                | University of Konstanz                                                           | Germany                                                    |
| van Kuijk, Silvy                    | Graduate student, Anthropology                      | The University of Texas at Austin                                                | United States of America (the)                             |
| Van Landuyt, Josefien               | Phd                                                 | Universiteit gent                                                                | Belgium                                                    |
| Van Langenhove, Leandro             | PhD Student                                         | University of Antwerp                                                            | Belgium                                                    |
| Van Look, Jasper                    |                                                     | University of Antwerp                                                            | Belgium                                                    |
| Van Loon, Anne                      | Senior Lecturer Water Science                       | University of Birmingham                                                         | United Kingdom of Great Britain and Northern Ireland (the) |
| Van Maarseveen, Jan                 | Professor of Organic Chemistry                      | University of Amsterdam                                                          | Netherlands (the)                                          |
| van Maldegem, Febe                  | Postdoc in Immuno-Oncology                          | The Francis Crick Institute                                                      | United Kingdom of Great Britain and Northern Ireland (the) |
| van Munster, Manuella               | Researcher in Plant biology                         | INRA                                                                             | France                                                     |
| van Neerbos, Frank Antonie Cornelus | PhD candidate in Entomology                         | Wageningen University & Research + Catholic University of Leuven                 | Netherlands (the)                                          |
| Van Nevel, Lotte                    | Forest & Nature Lab                                 | Ghent University                                                                 | Belgium                                                    |
| van Niel, Guillaume                 | Research Director, Cell biology                     | Institute of Psychiatry and Neurosciences of Paris                               | France                                                     |
| van Oosten, Roos                    | Assistant Professor Urban Archaeology               | Faculty of Archaeology                                                           | Netherlands (the)                                          |
| Van Oosten, Raoul                   | Postdoc evolutionary ecology                        | Vrije Universiteit Amsterdam                                                     | Netherlands (the)                                          |
| van Oosterzee, Penny                | Adjunct Associate Professor                         | James Cook University                                                            | Australia                                                  |
| Van Opzeeland, Ilse                 | Senior Scientist Ocean Acoustics                    | Alfred-Wegener Institute Helmholtz Institute or Polar and Marine Research        | Germany                                                    |
| Van Oystaeyen, Annette              | Postdoctoral scientist Biology                      | University of Leuven                                                             | Belgium                                                    |
| van Raaij, Mark                     | Dpto de Estructura de Macromoléculas                | Centro Nacional de Biotecnología - CSIC                                          | Spain                                                      |
| van Rees, Charles                   | Postdoctoral researcher, Conservation Biologist     | Tufts University                                                                 | United States of America (the)                             |
| van Rhijn, Jon-Ruben                | Postdoctoral fellow Neuroscience                    | Radboudumc Nijmegen                                                              | Netherlands (the)                                          |
| van Rooyen, Lulu                    | Postdoctoral researcher                             | University of KwaZulu-Natal                                                      | South Africa                                               |

|                               |                                                                             |                                                                             |                                                            |
|-------------------------------|-----------------------------------------------------------------------------|-----------------------------------------------------------------------------|------------------------------------------------------------|
| van Rooyen, Cobus             | Geospatial Information Scientist                                            | Arup                                                                        | United Kingdom of Great Britain and Northern Ireland (the) |
| van Schooten, Bas             | ecology                                                                     | UPR-RP                                                                      | United States of America (the)                             |
| Van Schuylenbergh, Patricia   | Senior researcher - History of Environment                                  | Royal Museum of Central Africa                                              | Belgium                                                    |
| Van Sluys, Monique            | Wildlife Conservation Officer                                               | Taronga Conservation Society Australia                                      | Australia                                                  |
| Van Soest, Rob                | associate scientist                                                         | Naturalis Biodiversity Center                                               | Netherlands (the)                                          |
| Van Steenberge, Maarten       | Scientist                                                                   | Royal Belgian Institute for Natural Sciences                                | Belgium                                                    |
| Van Steenbergen, Laure        | PhD student                                                                 | Ghent University                                                            | Belgium                                                    |
| van Strien, Maarten J.        | Senior researcher                                                           | ETH Zurich                                                                  | Switzerland                                                |
| Van Sundert, Kevin            | PhD researcher in Biology                                                   | University of Antwerp                                                       | Belgium                                                    |
| van Terwingen, Steven         | PhD student, Inorganic Chemistry                                            | RWTH Aachen University                                                      | Germany                                                    |
| van Thienen, Peter            | principal scientist hydroinformatics                                        | KWR Water Research Institute                                                | Netherlands (the)                                          |
| van Treeck, Shari             | PhD Student - Geophysics                                                    | University of Bonn                                                          | Germany                                                    |
| Van Treeck, Ruben             | Ecology                                                                     | IGB Berlin                                                                  | Germany                                                    |
| van Trigt, Radboud            | Scientific director biomarkers                                              |                                                                             | Netherlands (the)                                          |
| van Veelen, Pieter            | PhD Candidate                                                               | Groningen Institute for Evolutionary Life Sciences, University of Groningen | Netherlands (the)                                          |
| van Veen, Frank               | Associate Professor of Ecology and Conservation                             | University of Exeter                                                        | United Kingdom of Great Britain and Northern Ireland (the) |
| van vliet, Jasper             | Assistant Professor in Environmental Geography                              | VU University Amsterdam                                                     | Netherlands (the)                                          |
| van Vliet, Peter              | Environmental Toxicologist                                                  | Board for the Authorisation of Pesticides                                   | Netherlands (the)                                          |
| van Vliet, Arnold             | PhD Biology                                                                 | Wageningen University & Research                                            | Netherlands (the)                                          |
| van Vliet, Oscar              | Lecturer                                                                    | ETH Zürich                                                                  | Switzerland                                                |
| van Vuuren, Gary              | Nuclear physicist                                                           | Atomic Energy Corporation, South Africa                                     | United Kingdom of Great Britain and Northern Ireland (the) |
| Van Wassenhove, Eva           | Master Biology                                                              | UAntwerpen                                                                  | Belgium                                                    |
| Van Wijmeersch, Paul          | MSc in Agricultural Sciences                                                |                                                                             | Belgium                                                    |
| Van Wissen van Veen, Lynn     | Engineer and climate scientist                                              | Wageningen University                                                       | Netherlands (the)                                          |
| van Woesik, Robert            | Professor                                                                   | Florida Institute of Technology                                             | United States of America (the)                             |
| van Wyk, Stephanie            | Researcher (PhD) Microbiology, Genetics, Biochemistry                       | University of Pretoria                                                      | South Africa                                               |
| van Zinnicq Bergmann, Maurits | PhD candidate                                                               | Florida International University                                            | United States of America (the)                             |
| Vanacker, Marie               | Project manager / Risk Assessment                                           | ANSES                                                                       | France                                                     |
| Vanalderweireldt, Lucie       | Postdoctoral Researcher                                                     | Université du Québec à Chicoutimi                                           | Canada                                                     |
| Vandeger, Rebecca             | Postdoctoral Research Fellow                                                | Western Sydney University                                                   | Australia                                                  |
| Vandelac, Louise              | Professor, Institute for environmental sciences and Department of Sociology | Université du Québec à Montréal                                             | Canada                                                     |
| Vandeman, Mike                | Mathematics & Psychology                                                    |                                                                             | United States of America (the)                             |
| Vandenboer, Yens              | Marine biology                                                              | Ghent University                                                            | Belgium                                                    |
| VandenBoer, Trevor            | Assistant Professor - Environmental Analytical Chemistry                    | York University                                                             | Canada                                                     |
| Vandenbroucke, Dirk           | Dr. Sc. - Research Scientist                                                | Agfa NV                                                                     | Belgium                                                    |

|                                 |                                                                       |                                                             |                                                            |
|---------------------------------|-----------------------------------------------------------------------|-------------------------------------------------------------|------------------------------------------------------------|
| Vandeputte, Marc                | Fish Geneticist                                                       | INRA                                                        | France                                                     |
| Vander Linden, Charles          | Soil scientist                                                        | Earth and Life Insititute, Université catholique de Louvain | Belgium                                                    |
| Vanderbush, Joel                | Curator of Conservation, Zoology                                      | Niabi Zoological Park                                       | United States of America (the)                             |
| Vandersteen, James              | Conservation Ecology                                                  | The University of Sydney                                    | Australia                                                  |
| Vandervaere, JP                 | University teacher / Hydrology                                        | IGE Grenoble                                                | France                                                     |
| Vandevoorde, Noé                | Physics                                                               | Université Libre de Bruxelles                               | Belgium                                                    |
| Vandewalle-Capo, Marine         | Postdoc in Molecular Biology                                          | Umeå University                                             | Sweden                                                     |
| Vandrovцова, Marta              | Principal investigator - Cell biology                                 | Institute of Physiology, the Czech Academy of Sciences      | Czech Republic (the)                                       |
| Vandrovcová, Tereza             | Sociology, Critical Animal Studies                                    | University of New York in Prague                            | Czech Republic (the)                                       |
| Vandvik, Vigdis                 | Professor, Plant Ecology                                              | University of Bergen                                        | Norway                                                     |
| Vangansbeke, Pieter             |                                                                       | Universiteit Gent, ForNaLab                                 | Belgium                                                    |
| Vanhaeren, Nina                 | PhD student                                                           | Ghent University                                            | Belgium                                                    |
| vanhille, josefine              | researcher                                                            | university of antwerp                                       | Belgium                                                    |
| Vanholsbeeck, Olivier           | Researcher                                                            | IGB Berlin                                                  | Germany                                                    |
| Vanmaercke, Matthias            | Lecturer, Department of Geography                                     | University of Liege                                         | Belgium                                                    |
| Vanmarcke, Gert                 | pH student in biotechnology                                           | VIB / KULeuven                                              | Belgium                                                    |
| VanMetter, Richard              | Senior Research Physicist (retired)                                   | Eastman Kodak Company                                       | United States of America (the)                             |
| Vanneste, Thomas                | Postdoc                                                               | Ghent University                                            | Belgium                                                    |
| Vanpé, Cécile                   | Research Engineer in Wildlife ecology and conservation                | Office Français de la Biodiversité                          | France                                                     |
| Vanreppelen, Giel               | PhD                                                                   | KU Leuven                                                   | Belgium                                                    |
| Vanuytrecht, Eline              | Research & Development Climate                                        | VITO - Flemish Institute for Technological Research         | Belgium                                                    |
| Vanwonterghem, Inka             | Postdoctoral Research Fellow in marine microbial ecology              | University of Queensland                                    | Australia                                                  |
| Vanzetta, Ivo                   | Senior Permanent Researcher / Neuroscience                            | CNRS                                                        | France                                                     |
| Varaden, Diana                  | Environmental Science                                                 | King’ s College London                                      | United Kingdom of Great Britain and Northern Ireland (the) |
| Varah, Alexa                    | Postdoctoral researcher, ecology                                      | Institute of Zoology                                        | United Kingdom of Great Britain and Northern Ireland (the) |
| Varaldi, Julien                 | Assistant Professor                                                   | University Lyon 1                                           | France                                                     |
| Varassin, Isabela               | Professor/Ecology                                                     | Universidade Federal do Paraná                              | Brazil                                                     |
| Vardag, Sanam                   | Environmental Physics                                                 | Heidelberg Center for the Environment                       | Germany                                                    |
| Varea, Rufino                   | PhD Candidate in Marine Science                                       | The University of the South Pacific                         | Fiji                                                       |
| Varela, Susana A. M.            | Post-doctoral Researcher                                              | IGC - Instituto Gulbenkian de Ciência                       | Portugal                                                   |
| Varelas, Vassileios             | Researcher                                                            | Biodynamic Research Institute                               | Sweden                                                     |
| Varga, Nóra                     | biologist                                                             | MTA Centre for Ecological Research                          | Hungary                                                    |
| Vargas Gastélum, Lluvia Beatriz | PhD. Student                                                          | CICESE                                                      | Mexico                                                     |
| Vargas Parada, Laura            | Molecular Biology and Immunoparasitology, Biology, School of Sciences | Universidad Nacional Autónoma de México (UNAM)              | Mexico                                                     |
| VARGAS PONCINI, JOSE LUIS       | BIOLOGIST. CIVIL SERVANT                                              | CEDEX. MINISTRY FOR ECOLOGICAL TRANSITION                   | Spain                                                      |

|                                |                                             |                                                                                                                   |                                                |
|--------------------------------|---------------------------------------------|-------------------------------------------------------------------------------------------------------------------|------------------------------------------------|
| Vári, Ágnes                    | researcher, ecologist                       | MTA Centre for Ecological Research                                                                                | Hungary                                        |
| Variawa, Tasneem               | Conservation scientist                      | SANBI                                                                                                             | South Africa                                   |
| Varon-Garcia, Daniela          | Biologist                                   | Universidad Icesi                                                                                                 | Colombia                                       |
| Varonen, Sirkka                | Psychotherapist, Psychology                 |                                                                                                                   | Switzerland                                    |
| Varsamopoulou, Evy             | Associate Professor                         | University of Cyprus                                                                                              | Cyprus                                         |
| Vasconcellos, Perola de Castro | Professor/researcher                        | Institute of Chemistry - University of Sao Paulo                                                                  | Brazil                                         |
| VASCONCELLOS, ANGELICA         | Assistant Professor, Environmental Sciences | Pontifical Catholic University of Minas Gerais                                                                    | Brazil                                         |
| Vasconcelos, Raquel            | Researcher                                  | CIBIO-InBIO BIOPOLIS                                                                                              | Portugal                                       |
| Vasey, Adrienne                | Assistant Teaching Professor                | The Pennsylvania State University                                                                                 | United States of America (the)                 |
| Vasilevska, Marinela           | PhD Geneticist                              | Clinical Hospital Acibadem Sistina                                                                                | Macedonia, Republic of (the former Yugoslavia) |
| Vasishth, Ashwani              | Associate Professor of Sustainability       | Ramapo College of New Jersey                                                                                      | United States of America (the)                 |
| Vasques, Ana                   | Senior Lecturer                             | Erasmus University Rotterdam                                                                                      | Netherlands (the)                              |
| Vasquez Correa, Angelly        | Graduate student                            | McGill University                                                                                                 | Canada                                         |
| Vasselon, Valentin             | Postdoctoral researcher - Aquatic Ecology   | AFB                                                                                                               | France                                         |
| Vasser, Madis                  | PhD student in informatics                  | University of Tartu                                                                                               | Estonia                                        |
| Vassiliadis, Christine         | Assistant Professor                         | Universite Paris Sud                                                                                              | France                                         |
| Vasyura-Bathke, Hannes         | Postdoctoral Researcher, Geophysics         | University Potsdam                                                                                                | Germany                                        |
| Vatanen, Tommi                 | Research Fellow                             | University of Auckland                                                                                            | New Zealand                                    |
| VATANT d'OLLONE, Jan           | PhD Student                                 | LMD / IPSL / Sorbonne University                                                                                  | France                                         |
| Vats, Gargi                    | M.Sc. Biodiversity and Conservation         | Guru Gobind Singh Indraprastha University                                                                         | India                                          |
| Vaughan, Brian                 | Staff Scientist                             | Primordial Genetics                                                                                               | United States of America (the)                 |
| Vaz, Carlota                   | Social Sciences, Social Policy              |                                                                                                                   | Portugal                                       |
| Vaz-de-Mello, Fernando         | professor                                   | Universidade Federal de Mato Grosso                                                                               | Brazil                                         |
| Vazey, Elena                   | Assistant Professor                         | –                                                                                                                 | United States of America (the)                 |
| Vazquez, Luis                  | Agroecology                                 | Retired                                                                                                           | Cuba                                           |
| Vazquez, Luis-Bernardo         | Senior Researcher                           | El Colegio de la Frontera Sur                                                                                     | Mexico                                         |
| Vázquez, Víctor                | PhD Student of Molecular Ecophysiology      | Department of Ecology, Faculty of Science, University of Málaga, Spain & Cocosphere Environmental Analysis, Spain | Spain                                          |
| Vázquez Moreno, Liemnys        | Magíster en Ecología Aplicada               | Universidad Austral de Chile                                                                                      | Chile                                          |
| Vázquez-Domínguez, Ella        | Professor                                   | Universidad Nacional Autónoma de México                                                                           | Mexico                                         |
| Veclin, Cloé                   | PhD Student, Analytical Chemistry           | Institute of Analytical Sciences and Physico-Chemistry for Environment and Materials (IPREM)                      | France                                         |
| Vedor, Marisa                  | PhD student                                 | CIBIO-InBio, Universidade do Porto                                                                                | Portugal                                       |
| Veenvliet, Jesse               | Post-Doctoral Researcher                    | Max Planck Institute for Medical Genetics                                                                         | Germany                                        |
| Vega, Cristina                 | PhD                                         | GEOMARE Investigación Terrestre y Marina. Julio Berdegue Aznar 457 CP 82110. Mazatlán, Sinaloa, México.           | Mexico                                         |
| Vega-Cendejas, Maria Eugenia   | Researcher                                  | Centro de Investigación y de Estudios Avanzados del IPN                                                           | Mexico                                         |
| Veiga, Joana                   | Marine Pollution                            | Deltares                                                                                                          | Netherlands (the)                              |

|                            |                                                                     |                                                                             |                                                |
|----------------------------|---------------------------------------------------------------------|-----------------------------------------------------------------------------|------------------------------------------------|
| Velasco, Ana               | professor and researcher/ Sociology                                 | UPM- Universidad Politécnica de Madrid                                      | Spain                                          |
| Velasco, Julian            | PhD                                                                 | Centro de Ciencias de la Atmósfera, Universidad Nacional Autónoma de México | Mexico                                         |
| Velasco, Dandara           | PhD Student                                                         | LIPhy                                                                       | France                                         |
| Velástegui-Montoya, Andrés | Environmental Sciences Researcher and professor                     | Escuela Superior Politécnica del Litoral                                    | Ecuador                                        |
| Velazco, Aileen T.         | Marine Biologist                                                    |                                                                             | Puerto Rico                                    |
| Velazquez, Víctor          | Teacher, Physics                                                    | UNAM                                                                        | Mexico                                         |
| Veldhuis, Michiel          | Assistant Professor in Environmental Biology                        | Leiden University                                                           | Netherlands (the)                              |
| Velevski, Metodija         | Ornithologist                                                       | Macedonian Ecological Society                                               | Macedonia, Republic of (the former Yugoslavia) |
| Velez, Leandro             | PostDoctoral Fellow                                                 | CONICET Argentina                                                           | Argentina                                      |
| Velez, Jorge               | Professor                                                           | Universidad Nacional de Colombia                                            | Colombia                                       |
| Velez, Jorge Julian        | Professor / Water Resources Management                              | Universidad Nacional de Colombia Sede Manizales                             | Colombia                                       |
| Velez-Zuazo, Ximena        | Marine Managing Director, BMAP-Peru                                 | Smithsonian Conservation Biology Institute                                  | Peru                                           |
| Velghe, Katherine          | Research professional, Biology                                      | Université du Québec à Montréal                                             | Canada                                         |
| Venables, Dean             | Lecturer in Physical and Environmental Chemistry                    | University College Cork                                                     | Ireland                                        |
| Vendeth Scavassa, Anelize  | Biologist                                                           |                                                                             | Brazil                                         |
| Veneklaas, Erik            | Plant Physiological Ecology                                         | University of Western Australia                                             | Australia                                      |
| Venier, Marta              | Environmental Chemistry                                             | Indiana University                                                          | United States of America (the)                 |
| Venkatasamy, Ramakrishna   | Director                                                            | EnvironSolutions Ltd                                                        | Mauritius                                      |
| Venkatesan, Madhavi        | Assistant Professor, Economics                                      | Northeastern University                                                     | United States of America (the)                 |
| Venmans, Frank             | Professor Environmental Economics                                   | UMONS                                                                       | Belgium                                        |
| Venn, Susanna              | Plant Ecologist                                                     | Deakin University                                                           | Australia                                      |
| Venolia, Lee               | geneticist                                                          | Williams College                                                            | United States of America (the)                 |
| Venter, Stephanus          | Microbiology                                                        | University of Pretoria                                                      | South Africa                                   |
| Venter, Anita              | Post-natural philosophy and implementation                          | University of the Free State                                                | South Africa                                   |
| Venter, Fanie              | Senior Researcher                                                   | Australian Tropical Herbarium                                               | Australia                                      |
| Venter, Arthurita          | Phycology                                                           | North-west University Potchefstroom                                         | South Africa                                   |
| Ventura, Beth              | Animal science                                                      |                                                                             | United States of America (the)                 |
| Vera, Víctor               | Biologist, ecological restoration                                   | Facultad Politécnica, Universidad Nacional de Asunción                      | Paraguay                                       |
| Verbeeck, Hans             | Professor, forest ecology                                           | Ghent University                                                            | Belgium                                        |
| Verbeek, Sarah             | Doctoral student of biophysical chemistry                           | University of Göttingen                                                     | Germany                                        |
| Verbeke, Sarah             | PhD student in Bioscience Engineering (Laboratory of Plant Ecology) | Ghent University                                                            | Belgium                                        |
| Verberk, Wilco             | Assistant Professor                                                 | Radboud University Nijmegen                                                 | Netherlands (the)                              |
| Verbeylen, Goedeke         | scientific attaché, mammal ecology                                  | Natuurpunt Studie                                                           | Belgium                                        |
| Verburg, Peter             | Professor Environmental Geography                                   | Institute for Environmental Studies, VU University Amsterdam                | Netherlands (the)                              |
| VERCRUYSE, Nathalie        | Foresight (Initial Diploma: Graduated engineer in chemistry)        | European Commission                                                         | Belgium                                        |
| Verdade, Vanessa           | Associate Professor                                                 | Federal University of ABC (UFABC)                                           | Brazil                                         |

|                                           |                                                                                                                                                                                    |                                                                                            |                                                            |
|-------------------------------------------|------------------------------------------------------------------------------------------------------------------------------------------------------------------------------------|--------------------------------------------------------------------------------------------|------------------------------------------------------------|
| Verdade, Luciano                          | Associate Professor                                                                                                                                                                | University of São Paulo                                                                    | Brazil                                                     |
| Verdaguer, Dolors                         | Professor                                                                                                                                                                          | University of girona                                                                       | Spain                                                      |
| Verde Selva, Gracie                       | Environmental Public Policy PhD                                                                                                                                                    | Brazilian Institute of Development and Sustainability                                      | Brazil                                                     |
| VERDEIL, Jean-Luc                         | Scientist/Plant Science                                                                                                                                                            | CIRAD                                                                                      | France                                                     |
| Verdonck, Rik                             | Post doctoral researcher in biology                                                                                                                                                | CNRS                                                                                       | France                                                     |
| Verdoya, Massimo                          | Professor of Geophysics                                                                                                                                                            | DISTAV - Univerisità di Genova                                                             | Italy                                                      |
| Vergara, Walter                           | Climate Change                                                                                                                                                                     | WRI                                                                                        | United States of America (the)                             |
| Vergara, Juan J.                          | Professor Ecology                                                                                                                                                                  | Univ. Cadiz                                                                                | Spain                                                      |
| Vergeiner, Johannes                       | Climate research                                                                                                                                                                   | Zentralanstalt für Meteorologie und Geodynamik                                             | Austria                                                    |
| Vergueiro Júnior, Alexandre Manoel Kirilo | Doctor student                                                                                                                                                                     | National Institute of Amazon Researches                                                    | Brazil                                                     |
| Verhagen, Teun                            | PhD Student                                                                                                                                                                        | CML, department of Industrial Ecology                                                      | Netherlands (the)                                          |
| Verhelst, Pieterjan                       | Postdoctoral researcher                                                                                                                                                            | Ghent University                                                                           | Belgium                                                    |
| Verhey, Steve                             | Plant Molecular Biology                                                                                                                                                            | Wahluke High School                                                                        | United States of America (the)                             |
| Verheyden, Hélène                         | researcher in behavioural ecology of wildlife                                                                                                                                      | INRA                                                                                       | France                                                     |
| Verheyen, Erik                            | Scientist                                                                                                                                                                          | Royal Belgian Institute of Natural Sciences                                                | Belgium                                                    |
| Verhoef, Anne                             | Professor of Soil physics and Micrometeorology                                                                                                                                     | The University of Reading                                                                  | United Kingdom of Great Britain and Northern Ireland (the) |
| Verhulst, Simon                           | Professor of the Evolutionary Biology of Ageing                                                                                                                                    | University of Groningen                                                                    | Netherlands (the)                                          |
| Veríssimo, Nuno                           | Herbarium Technician (Biology)                                                                                                                                                     | Plantentuin Meise                                                                          | Belgium                                                    |
| Verkuil, Yvonne                           | Molecular ecologist                                                                                                                                                                | Conservation Ecology Group, Groningen Institute for Life Sciences, University of Groningen | Netherlands (the)                                          |
| Vermeij, Mark                             | Science director                                                                                                                                                                   | Carmabi Foundation                                                                         | Curaçao                                                    |
| Vernaëve, Hans                            | Mathematics                                                                                                                                                                        | Ghent University                                                                           | Belgium                                                    |
| Vernay, Antoine                           | Postdoc, plant ecology and ecophysiology                                                                                                                                           | SLU, Forest Ecology and Management Department                                              | Sweden                                                     |
| Verneir, Camille                          | Research engineer - Bio-mathematics                                                                                                                                                |                                                                                            | France                                                     |
| Vernon, Philippe                          | CNRS Research Director in Ecology                                                                                                                                                  | University of Rennes 1                                                                     | France                                                     |
| Vernon, Richard                           | Retired, Tropical Agricultural Research Scientist, formerly Chief Agricultural Research Officer, Ministry of Agriculture, Zambia, & Dept for International Development, London, UK | Now: Population Matters charity, Secretary of Oxford UK branch                             | United Kingdom of Great Britain and Northern Ireland (the) |
| Veron, John (Charlie)                     | Scientist                                                                                                                                                                          | CRR                                                                                        | Australia                                                  |
| Veron, Geraldine                          | Professor - Systematics, biogeography and conservation                                                                                                                             | Museum National d'Histoire Naturelle, Paris                                                | France                                                     |
| Veronese, Elisa                           | Environmental Engineer, PhD student in Photovoltaic Systems                                                                                                                        | EURAC Research                                                                             | Italy                                                      |
| Verrangia, Douglas                        | University profesor/researcher                                                                                                                                                     | UFSCar                                                                                     | Brazil                                                     |
| Verrelst, Jochem                          |                                                                                                                                                                                    | University of Valencia                                                                     | Spain                                                      |
| Verro, Kristiina                          | PhD Student in Astrophysics                                                                                                                                                        | Kapteyn Astronomical Institute, University of Groningen                                    | Netherlands (the)                                          |
| Verschoor, Mark                           | PhD candidate                                                                                                                                                                      | University of Groningen                                                                    | Netherlands (the)                                          |
| Verschuren, Louis                         | PhD student in dendroecology                                                                                                                                                       | Ghent university                                                                           | Belgium                                                    |



|                               |                                                                                                      |                                                                               |                                |
|-------------------------------|------------------------------------------------------------------------------------------------------|-------------------------------------------------------------------------------|--------------------------------|
| Verschuuren, Jonathan         | Professor of international and European environmental law                                            | Tilburg University                                                            | Netherlands (the)              |
| Versick, Stefan               | Climate Modeller                                                                                     | Karlsruhe Institute of Technology                                             | Germany                        |
| Versluijs, Erik               | Master student in Applied Ecology                                                                    | inland Norway university of applied science                                   | Norway                         |
| Verweij, Pita                 | Associate Professor ecology                                                                          | Utrecht University, Copernicus Inst. of Sustainable Development               | Netherlands (the)              |
| Veselaj, Zeqir                | Professor                                                                                            | University of Prishtina                                                       | Albania                        |
| Vesely, Cornelia              | Postdoc/Medical Sciences                                                                             | Medical University of Vienna                                                  | Austria                        |
| Vesenska, James               | Professor of Physics                                                                                 | University of New England                                                     | United States of America (the) |
| Vesga Aguado, Maria del Pilar | PhD Student                                                                                          | ETH Zurich                                                                    | Switzerland                    |
| Vesga Blanco, Paola Marcela   | Bióloga independiente                                                                                |                                                                               | Colombia                       |
| Vested, Malene                | PhD Coastal Engineering                                                                              | Technical University of Denmark                                               | Denmark                        |
| Vet, Louise                   | Director Netherlands Institute of Ecology (NIOO-KNAW) and professor in Ecology Wageningen University | Netherlands Institute of Ecology (NIOO-KNAW)                                  | Netherlands (the)              |
| Veteto, James                 | Associate Professor of Environmental Anthropology                                                    | Western Carolina University                                                   | United States of America (the) |
| Vetter, Vanessa               | research assistant                                                                                   | University of Koblenz-Landau                                                  | Germany                        |
| VEYRUNES, Frederic            | CNRS researcher in Evolutionary Biology                                                              | CNRS                                                                          | France                         |
| Veytia, Devi                  | PhD Candidate in Oceans and Cryosphere                                                               | Institute of Marine and Antarctic Studies                                     | Australia                      |
| Vézina, Nicole                | Professeure titulaire (ergonomie)                                                                    | Université du Québec à Montréal                                               | Canada                         |
| Vezirian, Kevin               | Postdoctoral researcher                                                                              | University of Western Australia                                               | Australia                      |
| Vezzulli, Luigi               | Professor                                                                                            | University of Genoa                                                           | Italy                          |
| Via, Sara                     | Professor                                                                                            | University of Maryland, College Park                                          | United States of America (the) |
| Viana, Blandina               | Professor/Ecology                                                                                    | Federal University of Bahia                                                   | Brazil                         |
| Viana, Duarte                 | Postdoc                                                                                              | German Centre for Integrative Biodiversity Research (iDiv) Halle-Jena-Leipzig | Germany                        |
| Viana, Pedro                  | Professor Auxiliar, Astronomy                                                                        | Universidade do Porto                                                         | Portugal                       |
| Viane, Ronald                 | Botany                                                                                               | Ghent University                                                              | Belgium                        |
| Viaud, Valérie                | Agronomist                                                                                           | INRA                                                                          | France                         |
| Viblanç, Vincent A            | Researcher                                                                                           | CNRS                                                                          | France                         |
| Vicca, Sara                   | Researcher / Global Change Ecology                                                                   | University of Antwerp                                                         | Belgium                        |
| Vicent, Jorge                 | Remote sensing scientist                                                                             | Magellium                                                                     | France                         |
| Vicente, Eduardo              | PhD student                                                                                          | Universidad de Alicante                                                       | Spain                          |
| Vickers-Rich, Patricia        | Chair in Palaeontology/Palaeobiology                                                                 | Monash University and Swinburne University of Technology                      | Australia                      |
| Victorero, Lissette           | Post-doctoral researcher                                                                             | Muséum national d'Histoire naturelle                                          | France                         |
| Vida, Gabor                   | Professor emeritus                                                                                   | Hungarian Academy of Sciences                                                 | Hungary                        |
| Vidal, Eric                   | Senior Scientist Conservation Biology                                                                | IRD                                                                           | New Caledonia                  |
| Vidal, Rodrigo                | Civil Engineer                                                                                       | PUCE                                                                          | Ecuador                        |
| Vidal, Jean-Philippe          | Hydroclimatologist                                                                                   | Irstea                                                                        | France                         |
| Vidal, Florian                | Political Science/History                                                                            | Paris Interdisciplinary Energy Research Institute                             | France                         |
| Vidal, Nicolas                | Assistant Professor                                                                                  | MNHN                                                                          | France                         |

|                           |                                                      |                                                                           |                                                            |
|---------------------------|------------------------------------------------------|---------------------------------------------------------------------------|------------------------------------------------------------|
| Vidal, Diogo              | Invited Assistant Researcher / Sociology             | Centre for Functional Ecology, University of Coimbra                      | Portugal                                                   |
| Vidal, Mathilde           | PhD in Zoology                                       | University of Regensburg                                                  | Germany                                                    |
| Vidal, Cynthia            | Research fellow in physics                           | Imperial College London                                                   | United Kingdom of Great Britain and Northern Ireland (the) |
| Vidal Merino, Mariana     | Climate Change Adaptation                            | Technische Universitaet Dresden                                           | Germany                                                    |
| Vidal-Dupiol, Jeremie     | Permanent reasercher                                 | IFREMER                                                                   | France                                                     |
| Vidaller, Christel        | Postdoctoral researcher                              | IMBE                                                                      | France                                                     |
| Videla, Maria Laura       | Ecological Economics                                 | WU Wien                                                                   | Austria                                                    |
| Vidick, Nicolas           | Regulatory toxicologist                              | Sciensano (Public Health Institute)                                       | Belgium                                                    |
| Viegas, Ana Cristina      | Assistant Professor (Microbiology)                   | Instituto Superior Técnico - University of Lisbon                         | Portugal                                                   |
| Viegas, Ivan              | Reseachar                                            | Universidade de Coimbra                                                   | Portugal                                                   |
| Viehboeck, Tobias         | PhD Student                                          | University of Vienna                                                      | Austria                                                    |
| Vieira, Leandro Manzoni   | Professor of Zoology                                 | Universidade Federal de Pernambuco                                        | Brazil                                                     |
| Vieira, Raísa             | Postdoctoral reasearcher                             | Federal University of Goiás (UFG)                                         | Brazil                                                     |
| Vieira, Armando           | Professor Senior                                     | University Federal of São Carlos                                          | Brazil                                                     |
| Vieira, Simone            | Researcher/Ecosystem Ecology                         | NEPAM/UNICAMP                                                             | Brazil                                                     |
| Vieira, Marcus Vinícius   | Professor, Population and Landscape Ecology          | Universidade Federal do Rio de Janeiro                                    | Brazil                                                     |
| Vieira, Diana             | Researcher in Environmental Sciences and Engineering | University of Aveiro, CESAM - Centre for Environmental and Marine Studies | Portugal                                                   |
| Vieira, Joana             | Junior Researcher                                    | University of Coimbra                                                     | Portugal                                                   |
| Vieites, David            | Senior Research Scientist                            | Consejo Superior de Investigaciones Científicas                           | Spain                                                      |
| Viennet, David            | PhD student in environmental geosciences             | Université de Rouen                                                       | France                                                     |
| Viganò, Daniele           | Post-doc researcher in Astrophysics                  | Univeristy of the Balearic Islands                                        | Spain                                                      |
| Vighi, Morgana            | Post doctoral researcher in Marine Biology           | University of Barcelona                                                   | Spain                                                      |
| Vighi, Marco              | Senior Scientist Ecotoxicology                       | IMDEA Water Institute                                                     | Spain                                                      |
| Vigil, Cecilia            | Prof. of Biology                                     | Truckee Meadows Community College                                         | United States of America (the)                             |
| Vignati, Davide A.L.      | Researcher / Ecotoxicology                           | CNRS                                                                      | France                                                     |
| Vignes, Matthieu          | Senior Lecturer in Statistical Genetics              | Massey University                                                         | New Zealand                                                |
| Vignieri, Sacha           | Deputy Editor                                        | Science                                                                   | United States of America (the)                             |
| Vila, Magda               | Biological ecology - phytoplankton                   | Institu de Ciències del Mar (CSIC)                                        | Spain                                                      |
| Vilà Planella, Montserrat | Research Professor                                   | EBD-CSIC                                                                  | Spain                                                      |
| Vila-Concejo, Ana         | Associate Professor                                  | The University of Sydney                                                  | Australia                                                  |
| Vilagrosa, Alberto        | Research in ecology                                  | Depr Ecology, Univ Alicante_Fundacion CEAM                                | Spain                                                      |
| VILAIN, christiane        | History of physics                                   | Observatoryof Paris-Meudon and University Denis Diderot                   | France                                                     |
| Vilar, Ciro               | Postdoc                                              | Universidade Federal do Espírito Santo                                    | Brazil                                                     |
| Vilardy, Sandra           |                                                      | Los Andes University                                                      | Colombia                                                   |
| Vilas, Cesar              | Researcher Marine Ecology                            | IFAPA-ANDALUCIA GOVERNMENT                                                | Spain                                                      |
| Vilasboa, Anderson        |                                                      | UERJ                                                                      | Brazil                                                     |
| Vilches, Oscar            | Physicist                                            |                                                                           | United States of America (the)                             |
| Vilela, Roberto           | Public Health Technologist                           | Fiocruz                                                                   | Brazil                                                     |

|                                  |                                                                                                                                 |                                                                |                                                            |
|----------------------------------|---------------------------------------------------------------------------------------------------------------------------------|----------------------------------------------------------------|------------------------------------------------------------|
| Vilhelmsson, Andreas             | Researcher (PhD) in Public Health                                                                                               | Lund University                                                | Sweden                                                     |
| Villa, Pedro Manuel              | PhD in Ecology                                                                                                                  | Federal University of Vicosa                                   | Brazil                                                     |
| Vilà-Freixa, Jordi               | Full Professor; Computational chemistry                                                                                         | Universitat Internacional de Catalunya                         | Spain                                                      |
| VILLA-NAVARRO, FRANCISCO ANTONIO | RESEARCH PROFESSOR                                                                                                              | UNIVERSIDAD DEL TOLIMA                                         | Colombia                                                   |
| Villacañas de Castro, Carmen     | Ecology                                                                                                                         | Universität Bremen                                             | Germany                                                    |
| Villamil, Nora                   |                                                                                                                                 | University of Edinburgh                                        | United Kingdom of Great Britain and Northern Ireland (the) |
| Villar, Nacho                    | Postdoctoral Fellow                                                                                                             | UNESP Rio Claro                                                | Brazil                                                     |
| Villar, Rafael                   | Ecology Professor                                                                                                               | University of Cordoba                                          | Spain                                                      |
| Villarino, Andrea                | Biochemistry                                                                                                                    | Facultad de Ciencias                                           | Uruguay                                                    |
| Villarreal, María Luisa          | Head Natural Products Laboratory                                                                                                | Universidad Autónoma del Estado de Morelos                     | Mexico                                                     |
| Villasante, Sebastian            |                                                                                                                                 | Universidad Santiago de Compostela                             | Spain                                                      |
| Villasante, Francisco            | Researcher/Ecologist                                                                                                            | Universidad Nacional de San Agustín de Arequipa                | Peru                                                       |
| Villavicencio-Queijeiro, Alexa   | Researcher in Forensic Genetics                                                                                                 | UNAM                                                           | Mexico                                                     |
| Villegas, Juan Camilo            | Profesor Asociado                                                                                                               | Universidad de Antioquia                                       | Colombia                                                   |
| Villegas, Nahuel                 | Chief Scientist Officer                                                                                                         |                                                                | United Kingdom of Great Britain and Northern Ireland (the) |
| Villegas-Montes, Martha Leonor   | Biologist                                                                                                                       | University of Roehampton                                       | United Kingdom of Great Britain and Northern Ireland (the) |
| Villela, Dora M.                 | Associate Professor/ Plant Ecologist                                                                                            | Universidade Estadual do Norte Fluminense Darcy Ribeiro (UENF) | Brazil                                                     |
| Villela, Alexandre               | Junior researcher, natural products chemistry                                                                                   | Wageningen University and Research                             | Netherlands (the)                                          |
| Villela, Helena                  | Researcher                                                                                                                      | UFRJ                                                           | Brazil                                                     |
| Villemaire-Côté, Olivier         | PhD candidate in forest sciences                                                                                                | Université Laval                                               | Canada                                                     |
| Villero, Dani                    | Researcher                                                                                                                      | Forest Sciences Center of Catalonia                            | Spain                                                      |
| Villeval, Jean                   | Applied economics (retired)                                                                                                     | Battelle Memorial Institute (retired)                          | Mexico                                                     |
| Villoch, Pablo                   | Director / Facilitator                                                                                                          | Glocalminds                                                    | Chile                                                      |
| Villoria, Manuel                 | Professor                                                                                                                       | King Juan Carlos University                                    | Spain                                                      |
| Vilu, Raivo                      | Tallinn University of Technolog. Professor emeritus; Advisor to the Board, TFTAK - Center of Food and Fermentation Technologies | TTU: Center of Food and Fermentation Technologies              | Estonia                                                    |
| Vimercati, Giovanni              | Postdoctoral researcher                                                                                                         | University of Fribourg                                         | Switzerland                                                |
| Vina, Luis                       | Full Professor Condensed Matter Physics                                                                                         | Universidad Autonoma de Madrid                                 | Spain                                                      |
| Vincenot, Christian              | Assistant Professor in Ecology/Informatics                                                                                      | Kyoto University                                               | Japan                                                      |
| Vincent, Frederic                | Astrophysicist                                                                                                                  | CNRS / Observatoire de Paris / LESIA                           | France                                                     |
| Vincent, Maibach                 |                                                                                                                                 | Max Planck Institute for Evolutionary Anthropology             | Germany                                                    |
| Vincent, Rinterknecht            | Researcher                                                                                                                      | CNRS                                                           | France                                                     |
| Vincent, Julia                   | phD candidate                                                                                                                   |                                                                | France                                                     |
| Vincent, Jean-Baptiste           | Researcher                                                                                                                      | DLR Institute of Planetary Research                            | Germany                                                    |
| VINCENT, Florian                 | PhD Student                                                                                                                     | iEES Paris                                                     | France                                                     |
| Vincentz, Michel                 | Professor genetics                                                                                                              | UNICAMP                                                        | Brazil                                                     |

|                           |                                                                                                        |                                                                           |                                                            |
|---------------------------|--------------------------------------------------------------------------------------------------------|---------------------------------------------------------------------------|------------------------------------------------------------|
| Vincke, Caroline          | Professor in Forest Sciences                                                                           | Université catholique de Louvain                                          | Belgium                                                    |
| Vincze, Orsolya           | Post Doc                                                                                               | Babes-Bolyai University                                                   | Romania                                                    |
| Vindenes, Yngvild         | Associate professor in ecology and evolution                                                           | University of Oslo                                                        | Norway                                                     |
| Vine, Edward              | Retired Ecologist                                                                                      |                                                                           | United States of America (the)                             |
| Viniegra, Ana             | Bióloga                                                                                                | UNAM                                                                      | Mexico                                                     |
| Vinje, Jessica            | Botanist/Biologist                                                                                     | Conservation Biology Institute                                            | United States of America (the)                             |
| Vinolo, Marco Aurélio     | Immunology                                                                                             | University of Campinas                                                    | Brazil                                                     |
| Viñuela, Javier           | Investigador Científico del CSIC in Natural Resources Area, working on Ecology and Wildlife Management | Instituto de Investigación en Recursos Cinegéticos (IREC; CSIC-UCLM-JCCM) | Spain                                                      |
| Vinyoles, Dolors          | Associate Professor                                                                                    | University of Barcelona                                                   | Spain                                                      |
| Viola, Eduardo            | Professor of International Relations                                                                   | University of Brasilia                                                    | Brazil                                                     |
| Viola, Benjamin           | Ecology and Biological Oceanography                                                                    |                                                                           | Australia                                                  |
| VIOLATO ESPADA, ANA       | PhD Candidate                                                                                          | University of Florida                                                     | United States of America (the)                             |
| Violino, Paolo            | Professor (retired)                                                                                    | Dipartimento di Fisica, Università di Torino, Italy                       | Italy                                                      |
| Viotti, Sofia             | MSc Marine Biology                                                                                     | University of La Laguna                                                   | Spain                                                      |
| Vipond, Joe               | Cinical Assistant Professor, Emergency Medicine                                                        | University of Calgary Cummings School of Medicine                         | Canada                                                     |
| Virga, Vint               | wildlife conservation and welfare veterinarianVet                                                      | Veterinary Wildlife Behavior, Welfare, & Conservation                     | United States of America (the)                             |
| Virginio, Flávia          | Scientific Researcher and Curator of Entomological Collection                                          | Fundação Butantan                                                         | Brazil                                                     |
| Virkkala, Raimo           | Leading Researcher                                                                                     | Finnish Environment Institute                                             | Finland                                                    |
| Virtasalo, Joonas         | Senior Scientist, Marine Geology                                                                       | Geological Survey of Finland (GTK)                                        | Finland                                                    |
| Visconti, Maria Aparecida | Associate Professor- Physiology                                                                        | Instituto de Biociências - Universidade de São Paulo                      | Brazil                                                     |
| VIshniac, Ethan           | Editor in Chief & and Research Professor, Astrophysics                                                 | Johns Hopkins University                                                  | United States of America (the)                             |
| Vishwakarma, Medhavi      | Research Associate/ Biology                                                                            | School of cellular and molecular medicine                                 | United Kingdom of Great Britain and Northern Ireland (the) |
| Vishwanath, Sadhanandh    | Mathematics                                                                                            | Chennai Mathematical Institute                                            | India                                                      |
| Visintin, Francesca       | Ecological Economist                                                                                   | eFrame Ltd                                                                | Italy                                                      |
| Visser, Yvonne            | Neuroscientist                                                                                         | INSERM, France                                                            | France                                                     |
| Visser, Diederik          | Chair, Geologist and active in the field of primatology                                                | Dutch Gorilla Foundation                                                  | Netherlands (the)                                          |
| Visser, Ingrid            | Senior Scientist, Cetologist & Marine Biologist                                                        | Orca Research Trust, Whale Rescue                                         | New Zealand                                                |
| Visserman, Mariko Lisa    | Postdoctoral fellow in social psychology                                                               | University of Toronto                                                     | Canada                                                     |
| Vitalis, Tania            | Associate professor ; CR1                                                                              | INSERM                                                                    | France                                                     |
| Vitasse, Yann             | Researcher                                                                                             | Swiss Federal Research Institute WSL                                      | Switzerland                                                |
| Vitense, Kelsey           | Quantitative Ecologist                                                                                 |                                                                           | United States of America (the)                             |
| Vitikainen, Emma          | Adjunct Professor (docent), Ecology and Evolutionary biology                                           | University of Helsinki                                                    | Finland                                                    |
| Vitoraki, Maria           | Adjunct Professor Environmental Studies                                                                | American College of Greece                                                | Greece                                                     |
| Vitorino Jr, Oscar        | Biologist                                                                                              | Instituto Natureza do Tocantins                                           | Brazil                                                     |
| Vitt, Laurie              | Curator/Professor Ameritus, ecology and evolution                                                      | Sam Noble Museum/University of Oklahoma                                   | United States of America (the)                             |
| Vitule, Jean              | Ecology                                                                                                | Federal University of Parana                                              | Brazil                                                     |
| Vivas, Maria              | Postdoctoral Fellow                                                                                    | University of Extremadura                                                 | Spain                                                      |

|                            |                                                                            |                                                                                                                              |                                                            |
|----------------------------|----------------------------------------------------------------------------|------------------------------------------------------------------------------------------------------------------------------|------------------------------------------------------------|
| Vives, Stephen             | Professor of Biology                                                       | Georgia Southern University                                                                                                  | United States of America (the)                             |
| Vives-Inгла, Maria         | PhD student                                                                | Universitat Autònoma de Barcelona                                                                                            | Spain                                                      |
| Viviani, Pia               | Director, Science Communication and Citizen Science                        | catta gmbh                                                                                                                   | Switzerland                                                |
| Vizentin-Bugoni, Jeferson  | Postdoctoral researcher                                                    | University of Illinois at Urbana-Champaign                                                                                   | United States of America (the)                             |
| Vizina, Yvonne             | Assistant Professor, Indigenous Education                                  | University of Winnipeg                                                                                                       | Canada                                                     |
| Vizzini, Alfredo           | Mycology                                                                   | University of Torino, Dipartimento di Scienze della Vita e Biologia dei Sistemi                                              | Italy                                                      |
| Vlasiuk, Anastasiia        | Predoctoral fellow / Computational Neuroscience                            | European Molecular Biology Laboratory, Rome                                                                                  | Italy                                                      |
| Vleck, Carol               | Emeritus Professor, Biology                                                | Iowa State University                                                                                                        | United States of America (the)                             |
| Voedts, Henri              | PhD student - Microbiology                                                 | Sorbonne Université                                                                                                          | France                                                     |
| Voegel, Tanja              | Research Associate Biology                                                 | UBC Okanagan                                                                                                                 | Canada                                                     |
| Voelker, Bettina           | Professor of Chemistry                                                     | Colorado School of Mines                                                                                                     | United States of America (the)                             |
| Vogel, Yan B.              | PhD, Chemistry                                                             | Curtin University                                                                                                            | Australia                                                  |
| Vogel, Kristine            | Neuroscience                                                               | UT Health San Antonio                                                                                                        | United States of America (the)                             |
| Vogel, Manuel              | Professor fuer Neues Testament                                             | Friedrich Schiller Universitaet Jena                                                                                         | Germany                                                    |
| Vogg, Gerd                 | Curator Botanical Garden                                                   | Botanical Garden University Wuerzburg                                                                                        | Germany                                                    |
| Vogler, Barbara            | Research Associate / Veterinary Assistant                                  | National Reference Center for Poultry and Rabbit Diseases, Vetsuisse Faculty, University of Zurich                           | Switzerland                                                |
| Voigt, Karsten             | Senior Scientist, Bioinformatics of Marine Cyanobacteria                   | University of Freiburg                                                                                                       | Germany                                                    |
| Voigt, Kerstin             | Marine Biology                                                             |                                                                                                                              | United Kingdom of Great Britain and Northern Ireland (the) |
| Voigt, Hartmut             | Teacher Math / Physics (Dr.)                                               | Graduate school                                                                                                              | Germany                                                    |
| Voigt, Holm                | Senior Scientist                                                           | Center for Development Research, University of Bonn                                                                          | Germany                                                    |
| Voigtländer, Jens          | Atmospheric Scientist                                                      |                                                                                                                              | Germany                                                    |
| Voigtmann, Thomas          | Professor, Theoretical Physics                                             | German Aerospace Center                                                                                                      | Germany                                                    |
| Voinov, Alexey             | Distinguished professor                                                    | UTS                                                                                                                          | Australia                                                  |
| Voisin, Didier             | Professor of Atmospheric Chemistry                                         | University Grenoble Alpes                                                                                                    | France                                                     |
| Vojík, Martin              | PhD student of applied ecology                                             | Institute of Botany, Czech Academy of Sciences & Faculty of Environmental Sciences, Czech University of Life Sciences Prague | Czech Republic (the)                                       |
| Volckaert, Filip           | Professor Biology                                                          | KU Leuven                                                                                                                    | Belgium                                                    |
| Volkmer, Tamara            | PhD candidate                                                              | Max Planck Institute for Animal Behavior                                                                                     | Germany                                                    |
| Volkov, Ivan               |                                                                            | Uppsala University                                                                                                           | Sweden                                                     |
| Volkova-Volkmar, Ekaterina | Senior Data Scientist                                                      |                                                                                                                              | Switzerland                                                |
| Vollmer, Waldemar          | Professor of Bacterial Biochemistry                                        | Newcastle University                                                                                                         | United Kingdom of Great Britain and Northern Ireland (the) |
| Vollmer, Sarah             | PhD candidate; MSc Modeling + Computational Science; B.Engineering Physics | York Univeristy                                                                                                              | Canada                                                     |
| Vollmer, Doris             | apl. Prof., Physical chemistry                                             | Max Planck Institute for Polymer Research                                                                                    | Germany                                                    |
| Volovitch, Michel          | Pr in molecular genetics                                                   | Ecole Normale Supérieure                                                                                                     | France                                                     |
| Volponi, Marco             | Environmental Closed Life Support Systems                                  | European Space Agency                                                                                                        | Netherlands (the)                                          |

|                            |                                                          |                                                           |                                                            |
|----------------------------|----------------------------------------------------------|-----------------------------------------------------------|------------------------------------------------------------|
| von Arx, Georg             | Researcher                                               | Swiss Federal Research Institute WSL                      | Switzerland                                                |
| von Below, Jonathan        | Scholarship / Forest engineer - PhD Agricultural Science | CONICET - Institute of Subtropical Biology                | Argentina                                                  |
| von Bergh, Dennis          | Dr.                                                      | Open University Netherlands                               | Netherlands (the)                                          |
| von Dassow, Peter          | Associate Professor, Biological Oceanography             | Pontificia Universidad Católica de Chile                  | Chile                                                      |
| von Delft, Frank           | Professor, Structural Chemical Biology                   | University of Oxford                                      | United Kingdom of Great Britain and Northern Ireland (the) |
| von gillhaussen, philipp   | PhD - Plant scientist                                    | IBG-2 Forschungszentrum Jülich                            | Germany                                                    |
| Von Hagen, Lynn            | Conservation Biologist                                   |                                                           | United States of America (the)                             |
| von Hagke, Christoph       | Geology                                                  | RWTH Aachen University                                    | Germany                                                    |
| Von Heideman, Anne         | MD, PhD, senior consultant                               | Uppsala University                                        | Sweden                                                     |
| von Hessberg, Andreas      | post-doc                                                 | department for disturbance ecology                        | Germany                                                    |
| von Hippel, Barbara        | Biochemistry                                             | Martin-Luther-University Halle-Wittenberg                 | Germany                                                    |
| von Lilienfeld-Toal, Marie | Medicine                                                 |                                                           | Germany                                                    |
| von Malmborg, Fredrik      | Political scientist                                      | Linköping University                                      | Sweden                                                     |
| Von Neuhoﬀ, Christine      | Medical Doctor                                           | Praxis Katrin Herken                                      | Germany                                                    |
| von Nicolai, Constantin    | Postdoc                                                  | University of Tübingen                                    | Germany                                                    |
| von Puttkamer, Beatrix     | Scientific Outreach                                      | Karlsruhe Institute of Technology                         | Germany                                                    |
| von Rege, Inez             | Doctor                                                   | NHS                                                       | United Kingdom of Great Britain and Northern Ireland (the) |
| von Reumont, Frederik      | Research assistant                                       | University of Cologne                                     | Germany                                                    |
| von Schmalensee, Menja     | Ecologist                                                | West Iceland Center of Nature Research                    | Iceland                                                    |
| von Schneidmesser, Dirk    | Research Associate                                       | Institute for Advanced Sustainability Studies             | Germany                                                    |
| Vonk, Arie                 | Assistant Professor Benthic Ecology                      | University of Amsterdam                                   | Netherlands (the)                                          |
| Vonk, Ben                  | CEO                                                      | Compliance Engineering Nederland                          | Netherlands (the)                                          |
| Vonk Noordegraaf, Henco    | Policy Officer/ Senior Lecturer Applied Biology          | HAS University of Applied Sciences                        | Netherlands (the)                                          |
| Vonthron, Simon            | Human geography, PhD candidate                           | French National Institute of Agricultural Research (INRA) | France                                                     |
| Vorauer, Thomas            | PhD Student                                              | Materials Center Leoben                                   | Austria                                                    |
| Vorsatz, Lyle              | Lecture Marine Science                                   | University of Cape Town                                   | South Africa                                               |
| Vorster, Juan              | Associate Professor, Crop Physiology                     | University of Pretoria                                    | South Africa                                               |
| Vos, Vincent Antoine       | MSc in Tropical Ecology                                  | Universidad Autónoma del Beni                             | Bolivia (Plurinational State of)                           |
| Voss, Susan                | Achilles Professor of Engineering                        | Smith College                                             | United States of America (the)                             |
| Voss, Rachel               | PhD Candidate                                            | University of California, Santa Cruz                      | United States of America (the)                             |
| Vosteen, Ilka              | Postdoc                                                  | Wageningen University & Research                          | Netherlands (the)                                          |
| Voswinkel, Merik           | principle investigator                                   | Metamorph Research Institute                              | Netherlands (the)                                          |
| Vouillamoz, Naomi          | Environmental Geophysics                                 | Seismo Earth AG                                           | Switzerland                                                |
| VOUNSERBO, Emmanuel        | Enseignant/ chef Bureau Recherche et Documentation       | Ecole de Faune de Garoua/ Cameroun                        | Cameroon                                                   |
| Vovides, Andrew            | Researcher                                               | Instituto de Ecología, A.C.                               | Mexico                                                     |
| Vowles, Tage               | Ecologist, Ph.D.                                         | University of Gothenburg                                  | Sweden                                                     |
| voz, marianne              | Principal Investigator                                   | University of Liege                                       | Belgium                                                    |

|                            |                                                                 |                                                                     |                                                            |
|----------------------------|-----------------------------------------------------------------|---------------------------------------------------------------------|------------------------------------------------------------|
| Vredenburg, Myriel         | Physical Oceanographer                                          | Alfred Wegener Institute for Polar and Marine Research, Bremerhaven | Germany                                                    |
| Vreede, Jocelyne           | Assistant professor                                             | University of Amsterdam                                             | Netherlands (the)                                          |
| Vriend, Stefan             | PhD candidate in ecology and evolutionary biology               | Norwegian University of Science and Technology (NTNU)               | Norway                                                     |
| Vriens, Eva                | PhD Candidate Sociology                                         | Utrecht University                                                  | Netherlands (the)                                          |
| Vrijdaghs, Alexander       | Postdoc researcher evolutionary botany                          | KU Leuven                                                           | Belgium                                                    |
| VRIZ, Sophie               | Professor                                                       | University Paris Diderot                                            | France                                                     |
| Vu, Van                    | Director                                                        | NTT Hi-Tech Institute, Nguyen Tat Thanh University                  | Viet Nam                                                   |
| Vuarin, Pauline            | Post-doctoral researcher                                        | CNRS-Université de Bourgogne Franche-Comté                          | France                                                     |
| Vuellers, Jutta            | Research Fellow                                                 | School of Earth and Environment, University of Leeds                | United Kingdom of Great Britain and Northern Ireland (the) |
| VUILLERMOZ-BELLOD, Mélissa | Chemical Engineer                                               | Irstea                                                              | France                                                     |
| Vulinec, Kevina            | Professor of Wildlife Ecology                                   | Delaware State University                                           | United States of America (the)                             |
| Vuorinen, Katariina        |                                                                 | Norwegian University of Science and Technology                      | Norway                                                     |
| Vurnek, Maja               | Expert Associate - biologist/ecologist/ freshwater ecosystems   |                                                                     | Croatia                                                    |
| W. Amorim, Felipe          | Professor of Ecology                                            | São Paulo State University                                          | Brazil                                                     |
| Waag, Anne-Sophie          | Doctoral student                                                | University of Mannheim                                              | Germany                                                    |
| Wachocki, Barbara          | Professor                                                       | Weber State University                                              | United States of America (the)                             |
| Wachowicz, Elwira          | PhD/physics                                                     | Institute of Experimental Physics, University of Wrocław            | Poland                                                     |
| Wachter, Bettina           | Scientist, Evolutionary Ecology                                 | Leibniz Institut for Zoo and Wildlife Research                      | Germany                                                    |
| Wachter, Jakob             | Master's Candidate                                              | University of Wuerzburg                                             | Germany                                                    |
| Wadee, Khurram             | Senior Lecturer                                                 | University of Exeter                                                | United Kingdom of Great Britain and Northern Ireland (the) |
| Wadee, Ahmer               | Professor of Nonlinear Mechanics                                | Imperial College London                                             | United Kingdom of Great Britain and Northern Ireland (the) |
| Wadgyrmar, Susana          | Assistant Professor, Biology                                    | Davidson College                                                    | United States of America (the)                             |
| Wadhams, Peter             | Climate change research                                         | Cambridge University                                                | United Kingdom of Great Britain and Northern Ireland (the) |
| Wadsworth, Patricia        | Professor                                                       | university of Massachusetts                                         | United States of America (the)                             |
| Wadt, Willard              | Theoretical Chemist retired from Los Alamos National Laboratory | Los Alamos National Laboratory Foundation (Board Treasurer)         | United States of America (the)                             |
| Waeber, Patrick            |                                                                 | ETH                                                                 | Switzerland                                                |
| waelbroeck, claire         | climate scientist                                               | CNRS                                                                | France                                                     |
| Wagner, Jill               | Forest restoration                                              | Future Forests Nursery, LLC                                         | United States of America (the)                             |
| Wagner, Rabea              | PhD student - microbial infection biology                       | Spanish National Center for Biotechnology                           | Spain                                                      |
| Wagner, Matthias           | Project Manager in Optics Industry, PhD in Physics              | Carl Zeiss SMT GmbH, Rudolf-Eber-Straße 2, 73447 Oberkochen         | Germany                                                    |
| Wagner, Michael            | Professor/Microbial Ecology                                     | University of Vienna                                                | Austria                                                    |
| Wagner, Jan                | Radio Astronomy                                                 | Max Planck Institute for Radio Astronomy                            | Germany                                                    |

|                          |                                                              |                                                                                |                                                            |
|--------------------------|--------------------------------------------------------------|--------------------------------------------------------------------------------|------------------------------------------------------------|
| Wagstaff, Matthew        | Environmental Scientist                                      | University of British Columbia                                                 | Canada                                                     |
| Waheed, Shazia           | Marine biologist                                             |                                                                                | Ireland                                                    |
| Wahren, Henrik           |                                                              | Research Centre for Applied Alpine Ecology                                     | Australia                                                  |
| Waichman, Andrea         | Full professor                                               | Federal University of Amazonas                                                 | Brazil                                                     |
| Wainwright, Hayden       |                                                              | Queen's University                                                             | Canada                                                     |
| Wainwright, Stephen      | Senior Lecturer in Biological Sciences Retired               | Swansea University                                                             | United Kingdom of Great Britain and Northern Ireland (the) |
| Wakelam, Valentine       | Astrophysicist                                               | CNRS                                                                           | France                                                     |
| Wal, Christina           | Ecosystem Services                                           | University of Edinburgh                                                        | Germany                                                    |
| Walakira, John           | Senior Research Scientist: Fisheries and Aquaculture         | National Fisheries Resources Research Institute, NARO                          | Uganda                                                     |
| Walczyńska, Aleksandra   | Researcher                                                   | Jagiellonian University, Faculty of Biology                                    | Poland                                                     |
| Waldhardt, Rainer        | Prof. in Vegetation and Landscape Ecology                    | Justus Liebig University Giessen                                               | Germany                                                    |
| Waldmueller, Dr. Tom     | Biochemist and Head of Marketing                             | Pharma Industry                                                                | Germany                                                    |
| Waldmüller, Johannes     | Research Professor                                           | FLACSO Ecuador                                                                 | Ecuador                                                    |
| waldteufel, philippe     | senior scientist emeritus                                    | CNRS                                                                           | France                                                     |
| Walisser, Wayne          |                                                              | Retired                                                                        | United States of America (the)                             |
| Walker, Wayne            | Associate Scientist                                          | Woods Hole Research Center                                                     | United States of America (the)                             |
| Walker, Lawrence         | Professor Emeritus in Ecology                                | University of Nevada Las Vegas                                                 | United States of America (the)                             |
| Walker, Tony             | Assistant Professor                                          | Dalhousie University                                                           | Canada                                                     |
| Walker, Tracy            | District Biologist                                           | California Dept of Transportation                                              | United States of America (the)                             |
| Walker, Courteney        | MSc Student, Ecology                                         | University of Canterbury                                                       | New Zealand                                                |
| Walker, Alex W           | Physicist                                                    | National Research Council of Canada                                            | Canada                                                     |
| Walker, David            | MRSB CBiol, microbiology                                     | retired                                                                        | United Kingdom of Great Britain and Northern Ireland (the) |
| Walkington, Matt         | Oceanographer                                                | NIWA                                                                           | New Zealand                                                |
| Wall, William            | Investigador                                                 | Instituto Nacional de Astrofísica, Óptica, y Electrónica                       | Mexico                                                     |
| Wallace, Richard         | Professor of Environmental Studies                           | Ursinus College                                                                | United States of America (the)                             |
| Wallace, Kiri Joy        | Restoration Ecologist                                        | University of Waikato                                                          | New Zealand                                                |
| Waller, William          | Regents Professor Emeritus                                   | University of North Texas                                                      | United States of America (the)                             |
| Waller, Don              | Professor of Botany                                          | Univ of Wisconsin- Madison                                                     | United States of America (the)                             |
| Wallhagen, Marita        | Assisdtng Professor                                          | Univeristy of Gävle, Department of Building, Energy and Sustainability Science | Sweden                                                     |
| wallhead, Tristan        | Professor                                                    | University of Wyoming                                                          | United States of America (the)                             |
| Wallis De Vries, Michiel | Special Professor Insect Ecology and Conservation            | Wageningen University & Research                                               | Netherlands (the)                                          |
| Wallner-Novak, Markus    | Civil Engineer                                               | FH JOANNEUM                                                                    | Austria                                                    |
| Walmsley, Sam            | Research Associate                                           | Harvard University                                                             | United States of America (the)                             |
| Walmsley, Clive          | Lead Specialist Advisor - Climate Change and Decarbonisation | Natural Resources Wales                                                        | United Kingdom of Great Britain and Northern Ireland (the) |
| Walsh, Daniel            | Biology and environmental science                            | UNLV                                                                           | United States of America (the)                             |
| Walsh, Seana             | Conservation Biologist                                       | National Tropical Botanical Garden                                             | United States of America (the)                             |
| Walsh, Jessica           | Master of Science                                            | University of Vienna                                                           | Austria                                                    |



|                             |                                                    |                                                                        |                                                            |
|-----------------------------|----------------------------------------------------|------------------------------------------------------------------------|------------------------------------------------------------|
| Walston, Joe                | Senior Vice President                              | Wildlife Conservation Society                                          | United States of America (the)                             |
| Walter, Monika              | Scientist, Plant Pathology                         | The New Zealand Institute of Plant and Food Research Ltd               | New Zealand                                                |
| Walter, Thomas              | Professor                                          | GFZ                                                                    | Germany                                                    |
| Walter, Robert              | Professor of Geoscience                            | Franklin and Marshall College                                          | United States of America (the)                             |
| Walter, Juline              | Postdoc / Marine Microbiology                      | Nord University                                                        | Norway                                                     |
| Walter, Bruno Machado Teles | Senior Researcher                                  | Embrapa Recursos Genéticos e Biotecnologia                             | Brazil                                                     |
| Walter, David               | Postdoc                                            | Max Planck Institute for Chemistry                                     | Germany                                                    |
| Walters, Bradley            | Professor of Geography & Environment               | Mount Allison University                                               | Canada                                                     |
| Walters, Shirley            | Professor Emerita Adult and Continuing Education   | University of the Western Cape                                         | South Africa                                               |
| Waltert, Matthias           | Professor                                          | University of Goettingen                                               | Germany                                                    |
| Walther, Michael            | Postdoctoral researcher in astrophysics            | LMU Munich                                                             | Germany                                                    |
| Walton, Sara                | Associate Professor of Management                  | University of Otago                                                    | New Zealand                                                |
| Wanat, Marek                | Entomologist                                       | Museum of Natural History, University of Wroclaw                       | Poland                                                     |
| Wanek, Wolfgang             | University Professor                               | University of Vienna, Austria                                          | Austria                                                    |
| Wang, Deane                 | Professor Natural Resources                        | University of Vermont                                                  | United States of America (the)                             |
| Wang, Ying                  | Professor                                          |                                                                        | United States of America (the)                             |
| Wang, Denis                 | Retired, Marine Ecology                            | PhD University of Rhode Island                                         | United States of America (the)                             |
| Wang, Chuang                | Professor                                          | University of North Carolina at Charlotte                              | United States of America (the)                             |
| Wang, Ying-Jie              | PhD student                                        | Ecology, Evolution and Biodiversity Conservation, University of Leuven | Belgium                                                    |
| Warburton, Kevin            | Retired academic; Adjunct Research Fellow          | Charles Sturt University                                               | Australia                                                  |
| Ward, Sheila                | Ecology                                            | Independent                                                            | Puerto Rico                                                |
| Ward, Michael               | Scientist, Metrology                               | NPL                                                                    | United Kingdom of Great Britain and Northern Ireland (the) |
| Ward, Rebekah               | Associate Professor of Biology                     |                                                                        | United States of America (the)                             |
| Ward, Barbara J.            | PhD Student, Environmental Engineering             | Eawag: Swiss Federal Institute for Aquatic Science and Technology      | Switzerland                                                |
| Ward, Delphi                | Ecologist                                          | University of Tasmania                                                 | Australia                                                  |
| Ward, Adam                  | PhD Candidate - Epidemiology (Infectious Diseases) | George Washington University                                           | United States of America (the)                             |
| Wardle, Rob                 | Field Representative & Ecologist                   | QEII National Trust                                                    | New Zealand                                                |
| Wardrop, Nick               | Electrical Engineer                                | Sunergy Consulting                                                     | Australia                                                  |
| Ware, Jessica               |                                                    | Swansea University                                                     | United Kingdom of Great Britain and Northern Ireland (the) |
| Waring, Bonnie              | Assistant Professor of Biology                     | Utah State University                                                  | United States of America (the)                             |
| Waring, Kristen             | Professor of Forestry                              | Northern Arizona University                                            | United States of America (the)                             |
| Waring, Richard             | Emeritus Professor of Forest Ecosystems            | Oregon State University                                                | United States of America (the)                             |
| Warne, Tony                 | Senior Investigator Scientist, Structural Biology  | MRC Laboratory of Molecular Biology                                    | United Kingdom of Great Britain and Northern Ireland (the) |
| Warner, John                | research scientist, entomology                     | University of Florida, FLREC                                           | United States of America (the)                             |
| Warner, Emily               | DPhil student Plant Sciences                       | University of Oxford                                                   | United Kingdom of Great Britain and Northern Ireland (the) |

|                            |                                                     |                                                             |                                                            |
|----------------------------|-----------------------------------------------------|-------------------------------------------------------------|------------------------------------------------------------|
| Warners, David             | Professor of Biology                                | Calvin University                                           | United States of America (the)                             |
| Warsink, Stefan            | Lecturer Organic Chemistry                          | Leidn University of Applied Sciences                        | Netherlands (the)                                          |
| Wascher, Claudia           | Senior Lecturer                                     | Anglia Ruskin University                                    | United Kingdom of Great Britain and Northern Ireland (the) |
| Waser, Nickolas            | Professor of Biology/Ecologist                      | University of California                                    | United States of America (the)                             |
| Washington, David          | Internal Medicine and Pediatrics                    | Houston Methodist                                           | United States of America (the)                             |
| Washington, Haydn          | University of New South Wales, Australia            | PANGEA Research Centre                                      | Australia                                                  |
| Wasserman, Michael         | Assistant Professor of Anthropology & Human Biology | Indiana University                                          | United States of America (the)                             |
| Wasserman, Ryan            | Aquatic Ecology                                     | Botswana International University of Science and Technology | Botswana                                                   |
| Wassmer, Thomas            | Associate Professor of Biology                      | Siena Heights University                                    | United States of America (the)                             |
| Wasson, Michael            | Economist, Mathematician                            |                                                             | United States of America (the)                             |
| Waterhouse, Robert         | Assistant Professor                                 | University of Lausanne                                      | Switzerland                                                |
| Watermann, Burkard Theodor | Scientific Head                                     | LimnoMar                                                    | Germany                                                    |
| Watermeyer, Kate           | Postdoctoral fellow                                 | Deakin University                                           | Australia                                                  |
| Waters, Jonathan           | Professor of Zoology                                | University of Otago                                         | New Zealand                                                |
| Waterschoot, Béranger      | Teaching Assistant / PhD Student                    | UCLouvain                                                   | Belgium                                                    |
| Watkins, Nicholas          | Senior Lecturer                                     | Newcastle University                                        | United Kingdom of Great Britain and Northern Ireland (the) |
| Watkins, Nancy             | Neuroscientist and writer                           |                                                             | United States of America (the)                             |
| WATSON, JOHN               | BOTANIST                                            | RETIRED                                                     | Chile                                                      |
| Watts, Heath               | Geochemist                                          | UTEP                                                        | United States of America (the)                             |
| Watts, David               | Professor, Anthropology                             | Yale University                                             | United States of America (the)                             |
| Watts, David               | Postdoctoral Researcher, Ecology                    | Université de Sherbrooke                                    | Canada                                                     |
| Watts, Robyn               | Professor of Environmental Science                  | Charles Sturt University                                    | Australia                                                  |
| Watts, Sophie              | PhD Student                                         | University of British Columbia                              | Canada                                                     |
| Waugh, Rani                | Medical Laboratory Scientist/ Immunohematology      |                                                             | United States of America (the)                             |
| Waugh, Nathan              | Research Fellow, Biochemistry and Biophysics        | Oregon State University                                     | United States of America (the)                             |
| Waye, Heather              | Associate Professor of Biology                      | University of Minnesota Morris                              | United States of America (the)                             |
| Weako, Jackson             | PhD. Student                                        | Koç University                                              | Turkey                                                     |
| Weatherhead, Richard       | Bachelor of Science                                 | Northern Territory University                               | Australia                                                  |
| Webala, Paul               | Professor, Wildlife Biologist                       | Maasai Mara University                                      | Kenya                                                      |
| Webb, Steve                | Professor, Palaeoclimatology/Palaeoanthropology     | Bond University                                             | Australia                                                  |
| Webb, Arthur               | Coastal Science - Tropical Pacific Islands          | University of Wollongong                                    | Kiribati                                                   |
| Webber, Tom                | Ornithologist                                       | Florida Museum of Natural History, University of Florida    | United States of America (the)                             |
| Weber, Eliseu              | Adjunct Professor                                   | Universidade Federal do Rio Grande do Sul                   | Brazil                                                     |
| Weber, Eicke               | Prof. Emer.                                         | Univ of California, Berkeley                                | United States of America (the)                             |
| Weber, Urban               | Professor of Physics and Applied Materials Sciences | University of Applied Sciences, Bingen, Germany             | Germany                                                    |
| Weber, Manuel              | Research scientist                                  | El colegio de la Frontera Sur-ECOSUR                        | Mexico                                                     |

|                          |                                                       |                                                                                    |                                                            |
|--------------------------|-------------------------------------------------------|------------------------------------------------------------------------------------|------------------------------------------------------------|
| Weber, Nicola            | Lecturer in Biosciences                               | University of Exeter                                                               | United Kingdom of Great Britain and Northern Ireland (the) |
| Weber, Marc              | Geographer                                            |                                                                                    | United States of America (the)                             |
| Weber, Donald            | Research Entomologist                                 | Agricultural Research Service                                                      | United States of America (the)                             |
| Weber, Erwan             | Scientist                                             | OAB                                                                                | Sweden                                                     |
| Weber, Axelle            | PhD student                                           | Bordeaux INP                                                                       | France                                                     |
| Weber, Sam               | Graduate Student, Ecology and Evolutionary Biology    | University of California, Irvine                                                   | United States of America (the)                             |
| Weber, Michael           | Professor of Geophysics                               | GFZ and Univ. Potsdam                                                              | Germany                                                    |
| Weber, Andreas           | Lecturer                                              | Institut of Sociology. University of Vienna                                        | Austria                                                    |
| Weber, Britta            | Ergonomics / Occupational Science                     | Institut für Arbeitsschutz der DGUV (IFA)                                          | Germany                                                    |
| Weber, Paul              | Research Scientist, Quaternary Geology                | Geological Survey of Norway (NGU)                                                  | Norway                                                     |
| Weber, Tony              | National Lead - Water Modelling                       | Alluvium Consulting Australia                                                      | Australia                                                  |
| Weber, Johannes          | wiss. Mitarbeiter Dept. Anorganische Materialchemie   | Universität Siegen                                                                 | Germany                                                    |
| Weber, Natalie           | Independent Research Scientist (bats)                 | Independent Research Consultancy                                                   | Germany                                                    |
| WEBER, Christiane        | research scientist                                    | CNRS                                                                               | France                                                     |
| Webster, Nicole          | Principal Research Fellow                             | University of Queensland                                                           | Australia                                                  |
| Webster, Michael         | Robert G. Engel Professor of Ornithology              | Cornell University                                                                 | United States of America (the)                             |
| Wedekind, David          | Professional Engineer                                 | State of Florida                                                                   | United States of America (the)                             |
| Wedi, Marcel             | Phd Student                                           | Max-Planck-Institute for Dynamics and Self-Organization                            | Germany                                                    |
| Weedon, Christopher      | Waste Water Consultant/Biochemistry                   | Watercourse Systems Ltd                                                            | United Kingdom of Great Britain and Northern Ireland (the) |
| Weeks, Stephen           | Professor of Biology                                  | The University of Akron                                                            | United States of America (the)                             |
| Weeks, Deseret           | Environmental Geographer                              | UC Merced                                                                          | United States of America (the)                             |
| Wegener, Christian       | Professor of Neurogenetics                            | Biocenter, University of Würzburg                                                  | Germany                                                    |
| Wegner, Fanny            | Evolutionary Microbiologist                           | Institut Pasteur Paris                                                             | France                                                     |
| Wehenkel, Anne Marie     | Researcher                                            | Institut Pasteur                                                                   | France                                                     |
| Wehi, Priscilla          | Conservation Biologist                                | Manaaki Whenua Landcare Research                                                   | New Zealand                                                |
| WEHINGER, SERGIO         | PROFESSOR                                             | UNIVERSIDAD DE TALCA                                                               | Chile                                                      |
| Wehmanen, Oscar          | Mathematician                                         | Kelsey Research Foundation (Ret.)                                                  | United States of America (the)                             |
| Wehner, Ulrich           | Prof. of early childhood education                    | PH Karlsruhe                                                                       | Germany                                                    |
| Wehrenpfennig, Andreas   | Professor for Applied and Practical Computer Sciences | Hochschule Neubrandenburg                                                          | Germany                                                    |
| Weidenhausen, Jonas      | PhD student, biochemistry                             | Biochemistry Center, Heidelberg                                                    | Germany                                                    |
| Weidenmüller, Anja       | Biology                                               | University of Konstanz                                                             | Germany                                                    |
| Weidlich, Emanuela W. A. | Postdoc                                               | Universidade Federal de Santa Catarina                                             | Brazil                                                     |
| Weigand, Alexander       | Zoology Curator                                       | Musée National d'Histoire Naturelle                                                | Luxembourg                                                 |
| Weigelt, Patrick         | Senior Scientist in Macroecology and Biogeography     | University of Göttingen                                                            | Germany                                                    |
| Weil, Ernesto            | Professor/researcher in Marine Sciences               | University of Puerto Rico                                                          | United States of America (the)                             |
| Weill, Sylvain           | Assistant Professor                                   | National School for Water and Environmental Engineering - University of Strasbourg | France                                                     |
| Weinberger, Tina         | Energy Engineer & Climate Journalist                  | KIT                                                                                | Germany                                                    |

|                          |                                                                                   |                                                                   |                                                            |
|--------------------------|-----------------------------------------------------------------------------------|-------------------------------------------------------------------|------------------------------------------------------------|
| Weiner, Agnes            | Postdoctoral Researcher, Ecology and Evolution                                    | Smith College                                                     | United States of America (the)                             |
| Weinert, Lucy            | Henry Dale Fellow in Veterinary Medicine                                          | University of Cambridge                                           | United Kingdom of Great Britain and Northern Ireland (the) |
| Weingart, Jerome         | retired physicist                                                                 | UC Berkeley, LBNL                                                 | United States of America (the)                             |
| Weinreb-Willard, Mathieu | Bio-engineer                                                                      |                                                                   | Belgium                                                    |
| Weinstein, David         | Post Doctoral researcher/ Marine Geology                                          | Interuniversity Institute for Marine Sciences in Eilat            | United States of America (the)                             |
| Weinzettel, Jan          | Researcher                                                                        | Charles University                                                | Czech Republic (the)                                       |
| Weir, Bevan              | Mycology                                                                          | Manaaki Whenua                                                    | New Zealand                                                |
| Weis, Judith             | Professor Emerita Biological Sciences                                             | Rutgers University                                                | United States of America (the)                             |
| Weishampel, Peter        | Ecology; Manager of Field Sciences                                                | National Ecological Observatory Network                           | United States of America (the)                             |
| Weisiger, Richard        | Emeritus Professor of Medicine                                                    | University of California, San Francisco                           | United States of America (the)                             |
| Weiss, Shahaf            | PhD - Neuroscience                                                                | Max-Planck                                                        | Germany                                                    |
| Weiss, Harold            | Epidemiology                                                                      | University of Wisconsin                                           | United States of America (the)                             |
| Weiss, Anna              | Climate Resilience Post-Doctoral Research Fellow                                  | University of Belize Environmental Research Institute             | Belize                                                     |
| Weiss, Fabio             | Researcher/Phd student - Ecology/Entomology                                       | Eberswalde University for Sustainable Development                 | Germany                                                    |
| Weiss, Aaron             | Physicist                                                                         | University of Colorado                                            | United States of America (the)                             |
| Weiss, Sydney            | Water Quality Scientist                                                           | Oregon State University                                           | United States of America (the)                             |
| Weiß, Michael            | Director                                                                          | Steinbeis Innovation Center, Organismal Mycology and Microbioloty | Germany                                                    |
| Weissgerber, Alexander   | M.D.                                                                              | Leipzig Heart Centre Herzzentrum, Germany                         | Germany                                                    |
| Weißhuhn, Peter          | Researcher in Landscape Ecology                                                   | Leibniz Centre for Agricultural Landscape Research (ZALF)         | Germany                                                    |
| Weitz, Nora              | Adjunct Instructor                                                                | Calhoun Community College                                         | United States of America (the)                             |
| Weksler, Marcelo         | Full Professor, Mammalogy                                                         | Museu Nacional / Universidade Federal do Rio de Janeiro           | Brazil                                                     |
| Welch, Andreanna         | Assistant Professor (Research) in Ecology, Evolution & the Environment            | Durham University                                                 | United Kingdom of Great Britain and Northern Ireland (the) |
| Weldon, Elise            | Courtesy Research Assistant, Earth Sciences                                       | University of Oregon                                              | United States of America (the)                             |
| Weldrick, Christine      | Support team member for Marine Ecosystem Assessment of the Southern Ocean (MEASO) | Institute for Marine & Antarctic                                  | Australia                                                  |
| Welford, Alex            | Conservation                                                                      |                                                                   | United Kingdom of Great Britain and Northern Ireland (the) |
| Weller, Florian          | Postdoctoral Researcher in Ecology                                                | CAFNR, University of Missouri                                     | United States of America (the)                             |
| Wells, Jennifer          | Biochemist                                                                        | LMU Munich, Max Planck Graduate School                            | Germany                                                    |
| Wells, Isabelle          | Bioinformatician                                                                  | Roche                                                             | Switzerland                                                |
| Wells, Alice             | Entomology                                                                        | [retired]                                                         | Australia                                                  |
| Wells, Konstans          | Lecturer (Research) in Bioscience                                                 | Swansea University                                                | United Kingdom of Great Britain and Northern Ireland (the) |
| Wells, Peter             | Senior Research Fellow and Adjunct Professor                                      | Dalhousie University                                              | Canada                                                     |
| Wells, Harry             | Postdoctoral Research Associate                                                   | Princeton University                                              | Kenya                                                      |
| Wells, Jeffrey           | Vice President of Boreal Conservation                                             | National Audubon Society                                          | United States of America (the)                             |

|                           |                                                                      |                                                                 |                                                            |
|---------------------------|----------------------------------------------------------------------|-----------------------------------------------------------------|------------------------------------------------------------|
| Welsh III, Dr. William O. | Global Resilience, Sustainability, THriving Lifeway, Deep Adaptation |                                                                 | United States of America (the)                             |
| Welton, Luke              | Evolutionary Biology                                                 |                                                                 | United States of America (the)                             |
| Wemelsfelder, Françoise   | Professor of animal behaviour and welfare                            | Scotland's Rural College                                        | United Kingdom of Great Britain and Northern Ireland (the) |
| Wendel, Christoph         | Astrophysics, PhD candidate                                          | Julius-Maximilians-Universität Würzburg                         | Germany                                                    |
| Wendling, Valentin        | Hydrologist - Postdoctoral researcher                                | Institut de recherche pour le développement                     | France                                                     |
| Wendt, Anja               | Research Scientist, Geodesy                                          | Bavarian Academy of Sciences and Humanities                     | Germany                                                    |
| Wendt, Ingo               | Biologist, Entomologist                                              | Staatliches Museum für Naturkunde                               | Germany                                                    |
| Wennekes, Paul            | PhD Biology                                                          | University of Reading                                           | United Kingdom of Great Britain and Northern Ireland (the) |
| Wenner, Mareike           | Doctor                                                               | Hospital Bremen Mitte                                           | Germany                                                    |
| Wenninger, Jochen         | Associate Professor of Hydrology & Water Resources                   | IHE Delft Institute for Water Education                         | Netherlands (the)                                          |
| Wenny, Daniel             | Landbird Senior Biologist                                            | SFBBO                                                           | United States of America (the)                             |
| Went, Marjorie            | Chemical Engineering                                                 | UC Berkeley                                                     | United States of America (the)                             |
| Wenzel, Klara             | Psychology                                                           | Technische Universität Berlin, Zentrum Technik und Gesellschaft | Germany                                                    |
| Wenzel, John              | Entomologist                                                         | Carnegie Museum of Natural History                              | United States of America (the)                             |
| Werkman, Harko            | College of Science and Engineering                                   | University of Tasmania                                          | Australia                                                  |
| Werne, Josef              | Professor, Dept. of Geology & Environmental Science                  | University of Pittsburgh                                        | United States of America (the)                             |
| Werneck, Fernanda         | Researcher - Biodiversity scientist                                  | Instituto Nacional de Pesquisas da Amazônia (INPA)              | Brazil                                                     |
| Werner, Inge              | Director                                                             | Swiss Centre for Applied Ecotoxicology                          | Switzerland                                                |
| Werner, Dr. Jeffery       | Wildlife Ecologist                                                   | BC Government                                                   | Canada                                                     |
| Werner, Christiane        | Professor of Ecosystem Physiology                                    | University of Freiburg                                          | Germany                                                    |
| Werner, Helen             | PhD student geosciences                                              | GFZ Potsdam                                                     | Germany                                                    |
| Werner, Philipp           | Researcher in Computer Science / AI                                  | Otto von Guericke University Magdeburg                          | Germany                                                    |
| Werner, Franz             | Professor Physics and Engineering                                    | University of Applied Sciences                                  | Germany                                                    |
| Werpachowska, Agnieszka   | CEO of a research company, applied statistics                        | Averisera Ltd                                                   | United Kingdom of Great Britain and Northern Ireland (the) |
| Werpachowski, Roman       | Research Engineer                                                    | DeepMind                                                        | United Kingdom of Great Britain and Northern Ireland (the) |
| Wertheim, Heiman          | Professor                                                            | Radboud university                                              | Netherlands (the)                                          |
| Weslawski, Jan Marcin     | director of the institute, professor, marine biology                 | Institute of Oceanology Polish Academy of Sciences              | Poland                                                     |
| Wesołowska, Wanda         | professor/biology                                                    | Wrocław University                                              | Poland                                                     |
| Wesołowski, Tomasz        | professor/biology                                                    | Laboratory of Forest Biology, Wrocław University                | Poland                                                     |
| Wessel, Jason             | PhD candidate                                                        | Griffith University                                             | Australia                                                  |
| Wesselingh, Renate        | Professor in evolutionary ecology                                    | UCLouvain                                                       | Belgium                                                    |
| Wessely, Johannes         | Post doc                                                             | university of Vienna                                            | Austria                                                    |
| West, Morris              | Cellular and Molecular Biology                                       | Stony Brook University                                          | United States of America (the)                             |
| West, Carol               | Honorary Research Associate                                          | Department of Conservation                                      | New Zealand                                                |
| West, Adam                | Professor of Plant Ecophysiology                                     | University of Cape Town                                         | South Africa                                               |
| Westcott, Daniel          | PhD student Plant Biology                                            | UC Berkeley                                                     | United States of America (the)                             |

|                      |                                                                         |                                                             |                                                            |
|----------------------|-------------------------------------------------------------------------|-------------------------------------------------------------|------------------------------------------------------------|
| Westermann, Fabian   | Senior Tutor and Lecturer in Ecology                                    | Victoria University of Wellington                           | New Zealand                                                |
| Western, Catherine   | Doctor                                                                  | Derriford Hospital, Plymouth                                | United Kingdom of Great Britain and Northern Ireland (the) |
| Westerweel, Jan      | PhD student                                                             | University of Rennes 1 (CNRS)                               | France                                                     |
| Westman, Richard     | New Product Development Chemist                                         | Libra Specialty Chemicals                                   | United Kingdom of Great Britain and Northern Ireland (the) |
| Westphal, Dirk       | Physicist                                                               | DESY                                                        | Germany                                                    |
| Westphal, Catrin     | Functional Agrobiodiversity                                             | University of Goettingen                                    | Germany                                                    |
| Westphal, Michael    | global environmental change, conservation biology                       | World Resources Institute                                   | United States of America (the)                             |
| Westram, Anja        | Postdoc                                                                 | IST Austria                                                 | Austria                                                    |
| Westwood, Jennifer   | Medical Research                                                        | Retired                                                     | Australia                                                  |
| Westwood, Alana      | Assistant Professor                                                     | Dalhousie University                                        | Canada                                                     |
| Wetherhill, Anthony  | Field Ornithologist                                                     | RSPB                                                        | United Kingdom of Great Britain and Northern Ireland (the) |
| Wettstein, Janek     | PhD student in Physics                                                  | Technical University of Vienna                              | Austria                                                    |
| Wex, Heike           | Senior Scientist / Research on atmospheric Aerosol-Cloud-Interaction    | Leibniz Institute for Tropospheric Research                 | Germany                                                    |
| Wexler, Anthony      | Distinguished Professor and Director of the Air Quality Research Center | University of California, Davis                             | United States of America (the)                             |
| Weyhenmeyer, Gesa    | Professor of Aquatic Biogeochemistry                                    | Uppsala University                                          | Sweden                                                     |
| Weymann, Ray         | Director Emeritus, Carnegie Observatories                               | Carnegie Institution for Science; member Nat. Acad. Science | United States of America (the)                             |
| Weymuth, Thomas      | Senior Scientist in Theoretical Chemistry                               | ETH Zurich                                                  | Switzerland                                                |
| Wheatley, Rebecca    | Postdoctoral Research Fellow in Ecology                                 | University of Tasmania                                      | Australia                                                  |
| Wheeler, John        | Professor                                                               | University of Wisconsin-River Falls                         | United States of America (the)                             |
| Wheeler, Dr. Ichsani | Researcher, Farming Systems Ecology                                     | Wageningen University Research                              | Netherlands (the)                                          |
| Whelan, Conor        | Technical Officer                                                       | University College Dublin                                   | Ireland                                                    |
| Whelan, Christopher  | Adjunct Research Associate Professor                                    | University of Illinois at Chicago                           | United States of America (the)                             |
| WHELAN, GARY         | Fisheries Program Manager                                               | MI DNR Fisheries Division                                   | United States of America (the)                             |
| Whisson, Desley      | Wildlife Biologist                                                      | Deakin University                                           | Australia                                                  |
| Whitacre, David      | Ecologist                                                               | Treasure Valley Math and Science Center                     | United States of America (the)                             |
| Whitaker, Stephen    | Marine Ecologist                                                        |                                                             | United States of America (the)                             |
| Whitaker, Michael    | Emeritus Professor of Physiology                                        | Newcastle University                                        | United Kingdom of Great Britain and Northern Ireland (the) |
| White, Sarah         | Medical Doctor (GP Registrar)                                           | Leicester GPVTS                                             | United Kingdom of Great Britain and Northern Ireland (the) |
| White, Brian         | Professor emeritus of Geosciences                                       | Smith College                                               | United States of America (the)                             |
| White, Thomas        | Biochemistry                                                            | University of California, Berkeley                          | United States of America (the)                             |
| White, Denis         | retired geographer                                                      | US EPA, Oregon State University courtesy faculty            | United States of America (the)                             |
| White, Joël          | Assistant professor in Ecology                                          | EDB lab, University of Toulouse                             | France                                                     |

|                             |                                                      |                                                                                                                     |                                                            |
|-----------------------------|------------------------------------------------------|---------------------------------------------------------------------------------------------------------------------|------------------------------------------------------------|
| White, Paula                | Wildlife Biologist                                   | Center for Tropical Research, Institute of the Environment and Sustainability, University of California Los Angeles | United States of America (the)                             |
| White, Seth                 | Associate Professor                                  | Oregon State University                                                                                             | United States of America (the)                             |
| White, Jacob                | Research Fellow, Astrophysics                        | Konkoly Observatory                                                                                                 | Hungary                                                    |
| White, Sarah                | SARAO Postdoctoral Fellow (Astrophysics)             | Rhodes University                                                                                                   | South Africa                                               |
| White, John                 | Associate Professor in wildlife ecology              | Deakin University                                                                                                   | Australia                                                  |
| White, Bryan                | Biologist                                            | Institute for Integrative Research in Earth and Space Science                                                       | United States of America (the)                             |
| White III, Richard          | Microbiology                                         | Washington State University                                                                                         | United States of America (the)                             |
| Whitecross, Melissa         | Conservation Scientist                               | BirdLife South Africa                                                                                               | South Africa                                               |
| whitehead, brandon          | data scientist   geoscience                          | CABI                                                                                                                | United Kingdom of Great Britain and Northern Ireland (the) |
| Whitehouse, Peter           | Professor Neurology and neuroscience                 | Case Western Teserve University                                                                                     | United States of America (the)                             |
| Whiting, Martin J.          | Associate Professor, Biological Sciences             | Macquarie University                                                                                                | Australia                                                  |
| Whitlock, Dani              | PhD Researcher                                       | Edinburgh Napier                                                                                                    | United Kingdom of Great Britain and Northern Ireland (the) |
| Whitney, Charlotte          | PhD Candidate, Environmental Studies                 | University of Victoria                                                                                              | Canada                                                     |
| Whitson, Jeremy             | Senior Fellow                                        | University of Washington                                                                                            | United States of America (the)                             |
| Whittaker, Benjamin         | PhD in Aquaculture                                   | Swansea University                                                                                                  | United Kingdom of Great Britain and Northern Ireland (the) |
| Whitten, Miranda            | Senior Lecturer                                      | Swansea University                                                                                                  | United Kingdom of Great Britain and Northern Ireland (the) |
| Whyte, Callum               | Biological Oceanographer                             | Scotttish Association for marine Science                                                                            | United Kingdom of Great Britain and Northern Ireland (the) |
| Wich, Serge                 | Professor in Primate Biology                         |                                                                                                                     | United Kingdom of Great Britain and Northern Ireland (the) |
| Wicker, Rebecca             | PhD Candidate, Environmental Biotechnology           | University of Eastern Finland                                                                                       | Finland                                                    |
| Wicker-Planquart, Catherine | Researcher in Biochemistry                           | IBS-Grenoble                                                                                                        | France                                                     |
| Wickliffe, Jeffrey          | Associate Professor of Environmental Health Sciences | Tulane University                                                                                                   | United States of America (the)                             |
| Wicks, Stephen              | Principal Data Scientist                             | Clarivate Analytics, LLC                                                                                            | United States of America (the)                             |
| Widdig, Anja                | Professor of Behavioural Ecology                     | University of Leipzig and Max-Planck Institute for Evolutionary Anthropology                                        | Germany                                                    |
| Wieczorek, Alina Madita     | PhD student                                          | NUI Galway                                                                                                          | Ireland                                                    |
| Wieczorek, Helmut           | Professor of Animal Physiology                       | University of Osnabruck                                                                                             | Germany                                                    |
| Wiedermannova, Jana         | Research associate in molecular biology              | Institute for Cell & Molecular Biosciences, Newcastle University                                                    | United Kingdom of Great Britain and Northern Ireland (the) |
| Wiedmann, Tommy             | Associate Professor of Sustainability Research       | UNSW Sydney                                                                                                         | Australia                                                  |
| Wiegand, Kerstin            | Professor / Ecology                                  | University of Göttingen                                                                                             | Germany                                                    |
| Wieland, Thomas             | Professor Computer Science                           | University of Applied Sciences and Arts                                                                             | Germany                                                    |
| Wieland, Andreas            | Associate Professor of Supply Chain Management       | Copenhagen Business School                                                                                          | Denmark                                                    |
| Wielinski, Jonas            | PhD Student Environmental Engineering                | ETH Zürich                                                                                                          | Switzerland                                                |
| Wielstra, Ben               | Assistant Professor                                  | Institute of Biology Leiden, Leiden University                                                                      | Netherlands (the)                                          |

|                      |                                                                          |                                                                    |                                                            |
|----------------------|--------------------------------------------------------------------------|--------------------------------------------------------------------|------------------------------------------------------------|
| Wiemers, Martin      | Head of Ecology                                                          | Senckenberg Deutsches Entomologisches Institut Münchenberg         | Germany                                                    |
| Wiencke, Lawrence    | Professor of Physics                                                     | Colorado School of Mines                                           | United States of America (the)                             |
| Wienecke, Barbara    | Ecologist                                                                |                                                                    | Australia                                                  |
| Wieners, Claudia     | Postdoc Climate Economics                                                | Scuola Superiore Sant'Anna                                         | Italy                                                      |
| Wienk, Raven         | MSc student (Microbiology)                                               | University of Pretoria                                             | South Africa                                               |
| Wienkoop, Stefanie   | Associate Professor                                                      | University of Vienna                                               | Austria                                                    |
| Wierenga, Eddy       | Assistant professor                                                      | Amsterdam University Medical Centres                               | Netherlands (the)                                          |
| Wiesner, Rudolf      | Professor                                                                | Center of Physiology and Pathophysiology                           | Germany                                                    |
| Wiessing, Lucas      | Principal scientist                                                      | European Monitoring Centre for Drugs and Drug Addiction (EMCDDA)   | Portugal                                                   |
| Wigge, Philip        | Professor and Head of Department for Plant Adaptation                    | University of Potsdam and Leibniz IGZ                              | Germany                                                    |
| Wignall, Veronica    | Doctoral researcher in insect foraging ecology                           | University of Sussex                                               | United Kingdom of Great Britain and Northern Ireland (the) |
| Wiklund, Christer    | Dr Evolutionary Ecology                                                  |                                                                    | Sweden                                                     |
| Wiklund, Christer G  | PhD Evolutionary Ecology                                                 | Department of Ecology, Swedish University of Agricultural Sciences | Sweden                                                     |
| Wilce, Matthew       | Professor of Biochemistry                                                | Monash University                                                  | Australia                                                  |
| Wilckens, Frederike  | PostDoc                                                                  | MARUM - Universität Bremen                                         | Germany                                                    |
| Wilde, Danielle      | Associate Professor –Design                                              | University of Southern Denmark                                     | Denmark                                                    |
| Wilde, Kerstin       | Political Economics - PhD candidate                                      | www.iamo.de                                                        | Germany                                                    |
| Wildey, Chester      | PhD, Electrical Engineering                                              | Independent                                                        | United States of America (the)                             |
| Wilhelm, Micah       | Climate science                                                          | Swiss Federal Institute for Forest, Snow and Landscape             | Switzerland                                                |
| Wilkening, Jennnifer | Research Ecologist                                                       | FWS                                                                | United States of America (the)                             |
| Wilkerson, Lonnie    | Cognitive Science/ AI                                                    | Auckland University of Technology                                  | New Zealand                                                |
| Wilkie, Martin       | Conservation Biologist in Wildlife Conservation and Ecosystem Management | Marwell Wildlife, UK                                               | United Kingdom of Great Britain and Northern Ireland (the) |
| Wilkins, Daniel      | Environmental Scientist                                                  |                                                                    | Australia                                                  |
| Wilkins, Peter       | Plant Breeding                                                           |                                                                    | United Kingdom of Great Britain and Northern Ireland (the) |
| Wilkinson, Stephen   | Associate Professor in Engineering Geology                               | University of Wollongong in Dubai                                  | United Arab Emirates (the)                                 |
| Willberg, Elias      | PhD candidate / Geography                                                | University of Helsinki                                             | Finland                                                    |
| Willemen, Louise     | Associate prof                                                           | University of Twente                                               | Netherlands (the)                                          |
| Willett, Walter      | Professor of Epidemiology and Public Health                              | Harvard. T.H. Chan School of Public Health                         | United States of America (the)                             |
| William, Frederick   | Research Curator                                                         | Fragile Inheritance Natural History                                | Canada                                                     |
| williams, barbara    | Mathematics and Physics                                                  | Poems for Parliament                                               | United Kingdom of Great Britain and Northern Ireland (the) |
| Williams, Aaron      | PhD Candidate - Power, Energy and Systems                                | University of Glasgow                                              | United Kingdom of Great Britain and Northern Ireland (the) |
| Williams, Timothy    | Microbiology                                                             | UNSW                                                               | Australia                                                  |
| Williams, Caroline   | Assistant Professor of Integrative Biology                               | University of California, Berkeley                                 | United States of America (the)                             |



|                          |                                                                 |                                                                                       |                                                            |
|--------------------------|-----------------------------------------------------------------|---------------------------------------------------------------------------------------|------------------------------------------------------------|
| Williams, Ramon          | Master' s of Natural Resources Management student               | University of Manitoba                                                                | Canada                                                     |
| Williams, Norris         | botamy                                                          | FLMNH                                                                                 | United States of America (the)                             |
| Williams, Patricia       | Statistician                                                    | Tricia Williams                                                                       | United Kingdom of Great Britain and Northern Ireland (the) |
| Williams, Robert         | Estuarine ecologist                                             | New South Wales Fisheries (retired)                                                   | Australia                                                  |
| Williams, Mark           | Professor of Cognitive Neuroscience                             | Macquarie University                                                                  | Australia                                                  |
| Williams, Murray         | Conservation biologist and ecologist (retired)                  | Formerly New Zealand Department of Conservation and Victoria University of Wellington | New Zealand                                                |
| Williams, Rosie          | Postgraduate researcher                                         | Zoological Society of London                                                          | United Kingdom of Great Britain and Northern Ireland (the) |
| Williams, Paris          | Psychologist                                                    |                                                                                       | New Zealand                                                |
| Williams, Jack           | Emeritus Senior Scientist                                       | Trout Unlimited                                                                       | United States of America (the)                             |
| Williams, Stephen        | Professor, Global Change Biology                                | James Cook University                                                                 | Australia                                                  |
| Williams, Lynda          | Physics Faculty                                                 | Santa Rosa Junior College                                                             | United States of America (the)                             |
| Williams, Barbara        | Retired software developer                                      | B Sc in Maths & Physics from Hebrew University in 1979 maiden name Gush               | United Kingdom of Great Britain and Northern Ireland (the) |
| Williams, Emma           | Clinical Biochemist                                             | Imperial College Healthcare NHS Trust                                                 | United Kingdom of Great Britain and Northern Ireland (the) |
| Williams, Christopher    | Senior lecturer School of Biological and Environmental Sciences | Liverpool John Moores University                                                      | United Kingdom of Great Britain and Northern Ireland (the) |
| Williams, Sam            | Postdoctoral Research Fellow in conservation biology            | University of Venda                                                                   | South Africa                                               |
| Williams, Howard         | Geoscientist                                                    | Brock                                                                                 | Canada                                                     |
| Williams, John G         | Physical and biological geography                               | retired                                                                               | United States of America (the)                             |
| Williamson, Dr. Dennis   | Director                                                        | Geoscene International (A Division of Scenic Spectrums Pty Ltd                        | Australia                                                  |
| Williamson, Phillip      | Honorary Reader                                                 | University of East Anglia                                                             | United Kingdom of Great Britain and Northern Ireland (the) |
| Williamson, Sean         | Postdoctoral Scientist                                          | Monash University                                                                     | Australia                                                  |
| Williamson, Michelle     | Science Support Biological Sciences                             | ESR                                                                                   | New Zealand                                                |
| Williamson, Michael      | PhD candidate                                                   | King's College London / Institute of Zoology                                          | United Kingdom of Great Britain and Northern Ireland (the) |
| Williamson, Brian        | Research Specialist, Aquatic Ecology                            | University of California, Davis                                                       | United States of America (the)                             |
| Williamson, Kathryn      | Earth and Space Science                                         | Kathryn Williamson Consulting LLC                                                     | United States of America (the)                             |
| Williamson, Elizabeth A. | Honorary Professor                                              | University of Stirling                                                                | United Kingdom of Great Britain and Northern Ireland (the) |
| Willig, Andreas          | Associate Professor in Computer Science                         | University of Canterbury                                                              | New Zealand                                                |
| Willis, Trevor           | Research Director                                               | Stazione Zoologica Anton Dohrn                                                        | Italy                                                      |
| Willison, Martin         | Professor (retired), Biology and Environmental Studies          | Dalhousie University                                                                  | Canada                                                     |
| Willmott, Keith          | Curator of Lepidoptera                                          | University of Florida                                                                 | United States of America (the)                             |
| Willms, Allan            | Professor, Department of Mathematics & Statistics               | University of Guelph                                                                  | Canada                                                     |
| Wills, Peter             | Theoretical Biologist, Department of Physics                    | University of Auckland                                                                | New Zealand                                                |
| Willson, Susan           | Assoc. Professor of Biology                                     | St. Lawrence University                                                               | United States of America (the)                             |

|                           |                                                                     |                                                                                  |                                                            |
|---------------------------|---------------------------------------------------------------------|----------------------------------------------------------------------------------|------------------------------------------------------------|
| Wilmé, Lucienne           | Project Coordinator in Madagascar                                   | World Resources Institute                                                        | Madagascar                                                 |
| Wilmotte, Annick          | PI microbiology                                                     | University of Liège                                                              | Belgium                                                    |
| Wilsey, Chad              | VP of Conservation Science                                          | National Audubon Society                                                         | United States of America (the)                             |
| Wilshire, Howard          | Senior scientist geologist                                          | U.S. Geological Survey                                                           | United States of America (the)                             |
| Wilson, Barry             | Systems Ecologist and Professional Forester                         | CE Analytic Ltd.                                                                 | Canada                                                     |
| Wilson, Martin            | PhD Environmental particulate toxicology                            | Freelance writer/editor                                                          | United Kingdom of Great Britain and Northern Ireland (the) |
| Wilson, Mark              | Associate Professor of Botany (ecology)                             | Oregon State University                                                          | United States of America (the)                             |
| Wilson, Mallory           |                                                                     | University of Queensland                                                         | Australia                                                  |
| Wilson, Vanessa           | Postdoctoral Researcher, Primatology                                | German Primate Center                                                            | Germany                                                    |
| Wilson, Nerida            | Manager, Molecular Systematics Unit                                 | Western Australian Museum                                                        | Australia                                                  |
| Wilson, Kerry-Jayne       | Senior lecturer in Ecology (retired)                                | Lincoln University                                                               | New Zealand                                                |
| Wilson, Sarah Jane        | Researcher, Tropical forest ecology and livelihoods                 | University of Victoria                                                           | Canada                                                     |
| Wilson, Keith             | Industrial Chemistry                                                | Self Employed                                                                    | South Africa                                               |
| Wilson, Chris             | research scientist and adjunct faculty (aquatic biodiversity)       | Trent University                                                                 | Canada                                                     |
| Wilson, Robert            | Research Scientist in Global Change Biology                         | Museo Nacional de Ciencias Naturales (Madrid, Spain)                             | Spain                                                      |
| Wilson, Scott             | Senior Lecturer                                                     | Macquarie University                                                             | Australia                                                  |
| Wilson, Susan             | Associate professor                                                 | University of new england                                                        | Australia                                                  |
| WILSON, DAVID             | Researcher / biogeochemical cycling in organic soils                | Earthy Matters Environmental Consultants                                         | Ireland                                                    |
| Wilson-Kruchen, Elizabeth | PhD in Chemistry, working as Bioanalytical Expert in Pharma Company | Biotest AG                                                                       | Germany                                                    |
| Wiltshire, David          | Professor of Theoretical Physics                                    | University of Canterbury                                                         | New Zealand                                                |
| Winarni, Nurul L          | Conservation biologist                                              | Research Center for Climate Change-Universitas Indonesia                         | Indonesia                                                  |
| Winchester, Neville       | Adjunct Assistant Professor Biology                                 | University of Victoria                                                           | Canada                                                     |
| Winck, Gisele             | Post-doc Fellow                                                     | Laboratoire d'Ecologie Alpine, UMR CNRS-UGA-USMB 5553, Université Grenoble Alpes | France                                                     |
| Winckel, Joy              | Senior Fish and Wildlife Biologist (retired)                        | US Fish and Wildlife Service                                                     | United States of America (the)                             |
| Windsor, Fredric          | Lecturer in Ecology                                                 | Cardiff University                                                               | United Kingdom of Great Britain and Northern Ireland (the) |
| Windwehr, Jana            | Senior Researcher in Political Science                              | Free University of Berlin                                                        | Germany                                                    |
| Winfrey, Claire           | PhD student in ecology & evolutionary biology                       | University of Tennessee, Knoxville                                               | United States of America (the)                             |
| Wingert, Juliana          | Postdoc                                                             | UFRGS                                                                            | Brazil                                                     |
| Winkel, Benjamin          | Support Scientist (Radioastronomy)                                  | Max-Planck-Institut für Radioastronomie                                          | Germany                                                    |
| Winkler, Jörg             | Bioinformatics                                                      | Freie Universität Berlin                                                         | Germany                                                    |
| Winkler, Bastian          | Agricultural Scientist                                              | University of Hohenheim - Dept. Biobased Resources in the Bioeconomy             | Germany                                                    |
| Winkler, Daniel           | Ecologist                                                           | University of California, Irvine                                                 | United States of America (the)                             |
| Winn, Brad                | Conservation Biologist                                              |                                                                                  | United States of America (the)                             |
| Winter, Carolin           |                                                                     | UFZ                                                                              | Germany                                                    |

|                                |                                         |                                                                                                        |                                                            |
|--------------------------------|-----------------------------------------|--------------------------------------------------------------------------------------------------------|------------------------------------------------------------|
| Winter, Marten                 | Scientific Head                         | sDiv - Synthesis Centre, German Centre for Integrative Biodiversity Research (iDiv) Halle-Jena-Leipzig | Germany                                                    |
| Winter, Carlos                 | Associate Professor/Parasitology        | Universidade de Sao Paulo                                                                              | Brazil                                                     |
| Winter, Maiken                 | Ecology                                 | WissenLeben e.V.                                                                                       | Germany                                                    |
| Winterhalter, Charles          | Research Associate, Genetics            | Centre for Bacterial Cell Biology                                                                      | United Kingdom of Great Britain and Northern Ireland (the) |
| Winters, Sandra                | Research Associate, Biological Sciences | University of Bristol                                                                                  | United Kingdom of Great Britain and Northern Ireland (the) |
| Wiper, Susan                   | PhD student                             | University of Chester                                                                                  | United Kingdom of Great Britain and Northern Ireland (the) |
| Wipf, Heidi                    | PhD Candidate                           | University of California, Berkeley                                                                     | United States of America (the)                             |
| Wipf, Sonja                    | Senior Researcher                       |                                                                                                        | Switzerland                                                |
| Wirth, Rainer                  | Scientist & Lecturer/ Plant Ecology     | University of Kaiserslautern                                                                           | Germany                                                    |
| Wirtz, Marcus                  | PhD Student - Astroparticle Physics     | III. Physikalisches Institut - RWTH Aachen University                                                  | Germany                                                    |
| Wiscombe, Warren               | emeritus climate scientist              | NASA Goddard Space Flight Center                                                                       | United States of America (the)                             |
| Wiseman, Clare                 | Associate Professor                     | School of the Environment, University of Toronto                                                       | Canada                                                     |
| Wishingrad, Van                | PhD candidate                           | University of Hawaii at Manoa                                                                          | United States of America (the)                             |
| Wislocka, Agata                | Astronomy and Astrophysics              | University of Innsbruck                                                                                | Austria                                                    |
| Wislocka, Agata                | Astrophysics                            |                                                                                                        | Ireland                                                    |
| Wissing, Jan Maik              | Physicist                               | Institute of Environmental Systems Research, University of Osnabrück                                   | Germany                                                    |
| Witt, Arne                     | Invasion biologist                      |                                                                                                        | South Africa                                               |
| Witt, Hannes                   | PostDoc, Biophysics                     | Max-Planck-Institute of Dynamics and Self-Organization                                                 | Germany                                                    |
| Witter, Marti                  | Fire Ecologist                          | National Park Service                                                                                  | United States of America (the)                             |
| Wittig, Rainer                 | Scientist Biology                       | Institute for Laser Technologies in Medicine and Metrology at Ulm University                           | Germany                                                    |
| Wittmann, Veronika             | Associate Professor for Global Studies  | Faculty of Social and Economic Sciences at the Johannes Kepler University Linz                         | Austria                                                    |
| Wloch-Salamon, Dominika        | Assistant Professor                     | Jagiellonian University, Institute of Environmental Sciences                                           | Poland                                                     |
| Wöbbecke, Kerstin              | biologist                               |                                                                                                        | Germany                                                    |
| Woehrl, Nicolas                | Physicist                               | University Duisburg-Essen                                                                              | Germany                                                    |
| Wohlgemuth, Thomas             | Plant ecology                           | Swiss Federal Institute for Forest, Snow and Landscape Research WSL                                    | Switzerland                                                |
| Wójcik, Adrian                 | Vice Dean, Psychology                   | Faculty of Humanities, Nicolaus Copernicus University                                                  | Poland                                                     |
| Wojczulanis-Jakubas, Katarzyna | Associate Professor                     | University of Gdańsk                                                                                   | Poland                                                     |
| Wolf, Kurt Bernardo            | Professor, physics                      | Universidad Nacional Autónoma de México                                                                | Mexico                                                     |
| wolfe, martha                  | professor emeritus of biology           | elizabethtown community and technical college                                                          | United States of America (the)                             |
| Wolfe, Joe                     | Professor of Physics                    | UNSW Sydney                                                                                            | Australia                                                  |
| WOLFE, MARTHA                  | professor emeritus                      | elizabethtown community and technical college                                                          | United States of America (the)                             |

|                       |                                                   |                                                              |                                                            |
|-----------------------|---------------------------------------------------|--------------------------------------------------------------|------------------------------------------------------------|
| Wolff, Irenaeus       | Economist                                         |                                                              | Switzerland                                                |
| Wolff, Nathan         | Geology                                           | UACH                                                         | Chile                                                      |
| Wolff, Jörg-Olaf      | Professor of Physical Oceanography                | University of Oldenburg                                      | Germany                                                    |
| Wölfling, Mirko       | Dipl.-Biol. aktuell Doktorand                     | Universität Wien                                             | Austria                                                    |
| Wolfram, Jakob        | Environmental Scientist                           | University of Koblenz-Landau                                 | Germany                                                    |
| Wolfson, Adi          | Prof. Green Processes Center                      | Sani Shamoon College of Engineering                          | Israel                                                     |
| Wolkewitz, Martin     | Professor Medical Statistics                      | University of Freiburg                                       | Germany                                                    |
| Wolkis, Dustin        | Seed Bank and Laboratory Manager                  | National Tropical Botanical Garden                           | United States of America (the)                             |
| Wöll, Dominik         | Professor                                         | RWTH Aachen University                                       | Germany                                                    |
| Wollenberg, Eva Lini  | Research Professor and CCAFS Flagship Leader      | University of Vermont and CGIAR-CCAFS                        | United States of America (the)                             |
| Wolny, Adrian         | PhD student                                       | Heidelberg University                                        | Poland                                                     |
| Wolters, Jan-Willem   | PhD Student in aquatic ecology                    | University of Antwerp                                        | Belgium                                                    |
| Wong, Bob             | Professor of Behavioural and Evolutionary Ecology | School of Biological Sciences, Monash University             | Australia                                                  |
| Wong, Lindsey S.      | Medical Biophysics                                |                                                              | Canada                                                     |
| Wong, Stephanie       | PhD candidate/conservation science                | RMIT                                                         | Australia                                                  |
| Wong, Laurence        | Professor of Biochemistry                         | Burman University                                            | Canada                                                     |
| Wong-Kone, Diane      | Wildlife Biologist                                | Otis Bay Ecological Consultants/Great Basin Bird Observatory | United States of America (the)                             |
| Wongbusarakum, Supin  | Social scientist                                  |                                                              | United States of America (the)                             |
| wongsanguan, nigel    | veterinarian                                      | Western Australia Veterinary Emergency and Specialisty       | Australia                                                  |
| Wonham, Walter        | Professor Emeritus, ECE                           | University of Toronto                                        | Canada                                                     |
| Wood, Anna            | Teaching Fellow/Ecology                           | University of Otago                                          | New Zealand                                                |
| Wood, Jamie           | Palaeoecologist                                   | Manaaki Whenua Landcare Research                             | New Zealand                                                |
| Wood, Marianna        | Associate Professor- Ecology                      | Bloomsburg University                                        | United States of America (the)                             |
| Wood, Alaina          | Sustainability Scientist                          | First Tennessee Development District                         | United States of America (the)                             |
| Wood, Graham          | Statistics                                        | University of Otago                                          | New Zealand                                                |
| Wood, Kathleen McNary | Principal                                         | SWA Environmental                                            | Turks and Caicos Islands (the)                             |
| Wood, Eleanor         | PhD student                                       | SAMS                                                         | United Kingdom of Great Britain and Northern Ireland (the) |
| Woodcock, Ben         | Ecologist                                         | Centre for Ecology & Hydrology                               | United Kingdom of Great Britain and Northern Ireland (the) |
| Woodley, Stephen      | Vice-Chair for Science and Biodiversity           | IUCN World Commission on Protected Areas                     | Canada                                                     |
| Woods, Carrie         | Assistant Professor of Biology                    | University of Puget Sound                                    | United States of America (the)                             |
| Woods, Briannyn       | Marine Biology - researcher                       | Institute for Marine and Antarctic Studies                   | Australia                                                  |
| Woodsworth, Glenn     | Research Scientist Emeritus                       | Geological Survey of Canada                                  | Canada                                                     |
| Woodward, Elsa        | Retired biochemist                                |                                                              | United Kingdom of Great Britain and Northern Ireland (the) |
| Woodwell, George M.   | President and Director Emeritus                   | The Woods Hole Research Center                               | United States of America (the)                             |
| Wooldridge, Rebecca   | Wildlife Biologist                                | Panthera                                                     | Belize                                                     |
| Wooldridge, John      | Soil science / plant nutrition                    | Agricultural Research Council (retired)                      | South Africa                                               |
| Woolf, Dominic        | Senior Research Associate                         | Cornell University                                           | United States of America (the)                             |

|                              |                                                        |                                                                                        |                                                            |
|------------------------------|--------------------------------------------------------|----------------------------------------------------------------------------------------|------------------------------------------------------------|
| Woolfall, Marc               | Chartered Chemist                                      |                                                                                        | United Kingdom of Great Britain and Northern Ireland (the) |
| Worden, M.D., Wm. Lamont     | Emergency Medicine                                     |                                                                                        | United States of America (the)                             |
| Wörheide, Prof. Dr. Gert     | Professor (Chair) of geobiology & Paleontology         | Ludwig-Maximilians-Universität München (LMU)                                           | Germany                                                    |
| Wormell, dominic             | Head of mammals                                        | Durrell                                                                                | United Kingdom of Great Britain and Northern Ireland (the) |
| Worsham, McLean              | PhD student of evolutionary biology                    | University of Hawaii                                                                   | United States of America (the)                             |
| Wosika-Witz, Victoria        | PhD student in Life Sciences                           | University of Lausanne                                                                 | Switzerland                                                |
| Wotton, Karl                 | Senior Lecturer in Migration Biology                   | University of Exeter                                                                   | United Kingdom of Great Britain and Northern Ireland (the) |
| Wouters, Stefan              | Cellular biologist                                     | Utrecht University                                                                     | Netherlands (the)                                          |
| Woutersen, Amber             | Palaeoecology                                          | University of Amsterdam                                                                | Netherlands (the)                                          |
| Woyciechowski, Michal        | Professor - biology                                    | Jagiellonian University                                                                | Poland                                                     |
| Wrage-Moennig, Nicole        | Professor of Grassland and Fodder Sciences             | University of Rostock                                                                  | Germany                                                    |
| Wraith, Jenna                | PhD Candidate/ Conservation biology and climate change | Griffith University                                                                    | Australia                                                  |
| Wrbka, Thomas                | Ass.Prof. / Landscape Ecology                          | Univ.Vienna                                                                            | Austria                                                    |
| Wright, Jeff                 | Software Engineer                                      |                                                                                        | United States of America (the)                             |
| Wright, Ian                  | Professor                                              | Macquarie University                                                                   | Australia                                                  |
| Wright, Philip               | Retired Chartered Fellow                               | Chartered Institute of Water and Environmental Management                              | United Kingdom of Great Britain and Northern Ireland (the) |
| Wright, Wendy                | Associate Professor, Biology                           | Federation University Australia                                                        | Australia                                                  |
| Wright, Tarah                | Professor                                              | Dalhousie University                                                                   | Canada                                                     |
| Wright, Rebecca              | Senior Research Associate/Environmental sciences       | University of East Anglia                                                              | United Kingdom of Great Britain and Northern Ireland (the) |
| Wright, Edward               | Biologist                                              | Max Planck Institute for Evolutionary Anthropologist                                   | Germany                                                    |
| Wright, Jeremy               | Emeritus Professor of Engineering Mathematics          | University of Bristol                                                                  | United Kingdom of Great Britain and Northern Ireland (the) |
| Wright, Patricia             | Professor                                              | University of Guelph                                                                   | Canada                                                     |
| Wright, Bruce                | Senior Scientist, ecologist                            | University of Alaska, retired                                                          | United States of America (the)                             |
| Wright, Sarah                | Water-Energy-Food Nexus                                | Wageningen University and Research                                                     | Netherlands (the)                                          |
| Wrobel, Iwona                | Material Science Engineer                              | University of Connecticut                                                              | United States of America (the)                             |
| Wubs, Jasper                 | Postdoctoral Fellow, Ecology and Agriculture           | ETH Zurich                                                                             | Switzerland                                                |
| Wuebbles, Donald             | Professor                                              | University of Illinois                                                                 | United States of America (the)                             |
| Wueringer, Barbara Elisabeth | Director & Principal Scientist                         | Sharks And Rays Australia                                                              | Australia                                                  |
| Wulff, Angela                | Professor in marine ecology                            | University of Gothenburg                                                               | Sweden                                                     |
| Wulfhorst, Jochen            | field ecologist, research worker and docent            | Universität Kassel                                                                     | Germany                                                    |
| Wund, Matthew                | Professor of Biology                                   | The College of New Jersey                                                              | United States of America (the)                             |
| Wunderlich, Rainer Ferdinand | PhD Student                                            | National Taiwan University                                                             | Taiwan                                                     |
| Wunsch, Carl                 | Professor of Physical Oceanography and Climate         | Harvard University                                                                     | United States of America (the)                             |
| Wurl, Oliver                 | Professor in Oceanography                              | Institut for Chemistry and Biology of the Marine Environment / University of Oldenburg | Germany                                                    |

|                          |                                                                                         |                                                                                             |                                                            |
|--------------------------|-----------------------------------------------------------------------------------------|---------------------------------------------------------------------------------------------|------------------------------------------------------------|
| Wuyts, Jurgén            | PhD student                                                                             | KU Leuven                                                                                   | Belgium                                                    |
| Wward, Selina            | Senior Lecturer                                                                         | The University of Queensland                                                                | Australia                                                  |
| Wyatt, Tristram          | Senior Research Fellow, Animal Behaviour (Zoology)                                      | University of Oxford                                                                        | United Kingdom of Great Britain and Northern Ireland (the) |
| Wydra, Kerstin           | Prof. Plant production and climate change                                               | Erfurt University of Applied Sciences                                                       | Germany                                                    |
| WYLER, Nicolas           | Curator                                                                                 | Conservatoire et Jardin botaniques                                                          | Switzerland                                                |
| Wynberg, Rachel          | Environmental scientist                                                                 | University of Cape Town                                                                     | South Africa                                               |
| Wynne, Darragh           | M Sc in Climate Change Media Policy and Society, Dublin City University                 | none                                                                                        | Ireland                                                    |
| Wysocka, Alicja          | PhD candidate                                                                           | International Institute of Molecular and Cell Biology in Warsaw                             | Poland                                                     |
| Wyss, Carlos             | Projekt Leader Platform Hydropower Mitigation                                           | Wasser-Agenda 21                                                                            | Switzerland                                                |
| Wyvill, Geoff            | Emeritus Professor, Computer Science                                                    | University of Otago                                                                         | New Zealand                                                |
| Xavier, Miguel           | Research Fellow                                                                         | International Iberian Nanotechnology Laboratory                                             | Portugal                                                   |
| Xavier, Joana            | Principal Researcher                                                                    | CIIMAR - Interdisciplinary Centre of Marine and Environmental Research, University of Porto | Portugal                                                   |
| Xiang, Xianling          | Professor                                                                               | Anhui Normal University; The Netherlands Institute of Ecology                               | China                                                      |
| Xie, Zunyi               | Postdoc                                                                                 | The University of Queensland                                                                | Australia                                                  |
| Xu, Feifei               | Researcher                                                                              | Uppsala University                                                                          | Sweden                                                     |
| Xuereb, André            | Professor of physics                                                                    | University of Malta                                                                         | Malta                                                      |
| Yabi, Ibouaïma           | Geographer ; Lecturer-Research                                                          | Univ. of Abomey-Calavi                                                                      | Benin                                                      |
| Yager, Karina            | Assistant Professor, Sustainability Studies                                             | Stonybrook University, New York                                                             | United States of America (the)                             |
| Yahiaoui-Doktor, Maryam  | Biometrician (also physicist + law-grad + computer scientist + environmental scientist) | IMISE, University of Leipzig                                                                | Germany                                                    |
| YALCIN, Refet Ali        | Post-doc / Mechanical Engineering                                                       | PPRIME                                                                                      | France                                                     |
| Yalcin Ozdilek, Sukran   | Professor/aquatic ecology                                                               | Canakkale Onsekiz Mart University Department of Biology                                     | Turkey                                                     |
| Yamamoto, Maria Emilia   | Emeritus Professor                                                                      | Universidade Federal do Rio Grande do Norte                                                 | Brazil                                                     |
| Yamamoto, Flavia         | Postdoc                                                                                 | Unesp                                                                                       | Brazil                                                     |
| YAMAMOTO, Ryoichi        | Professor Emeritus                                                                      | The University of Tokyo                                                                     | Japan                                                      |
| Yamaoka, Naomi           | Graduate Student                                                                        | UBCO                                                                                        | Canada                                                     |
| Yan, Norman              | Senior Research Scholar                                                                 | York University                                                                             | Canada                                                     |
| YAN, Li                  |                                                                                         | Guangxi University                                                                          | China                                                      |
| Yanai, Zohar             | Post-doctoral fellow                                                                    | UNIL                                                                                        | Switzerland                                                |
| Yáñez-Serrano, Ana Maria | postdoctoral fellow                                                                     | CREAF                                                                                       | Spain                                                      |
| Yang, Mary               | Climate Action Commission                                                               | City of Solana Beach                                                                        | United States of America (the)                             |
| Yang Amri, Affendi       | Research Officer (Coral Reef Ecology)                                                   | Institute of Ocean and Earth Sciences (IOES), University of Malaya                          | Malaysia                                                   |
| Yannelli, Florencia      | Postdoc                                                                                 | Centre for Invasion Biology                                                                 | South Africa                                               |
| Yannic, Glenn            | Professor, Biology                                                                      | Université Savoie Mont Blanc                                                                | France                                                     |

|                       |                                                         |                                                                                                |                                                            |
|-----------------------|---------------------------------------------------------|------------------------------------------------------------------------------------------------|------------------------------------------------------------|
| Yanos, Casey          | PhD in Marine Science                                   | University of Groningen                                                                        | Netherlands (the)                                          |
| Yanuar, Achmad        | Researcher and lecture                                  | Tropical Biodiversity Conservation Center, Biology Department, Universitas Nasional, Jakarta   | Indonesia                                                  |
| Yap, Jo Leen          | PhD candidate, Wildlife Researcher & Nature Educator    | Universiti Sains Malaysia & Langur Project Penang                                              | Malaysia                                                   |
| Yarish, Charles       | Professor                                               | University of Connecticut                                                                      | United States of America (the)                             |
| Yaro, Abubakar        | Molecular Virologist & Infectious Diseases Scientist    | Africa Health Research Organization                                                            | United Kingdom of Great Britain and Northern Ireland (the) |
| Yarzabal, Luis Andrés | Researcher in Extreme Microbiology                      | Universidad Católica de Cuenca                                                                 | Ecuador                                                    |
| Yasuhara, Moriaki     | Associate professor/Paleobiology                        | The University of Hong Kong                                                                    | Hong Kong                                                  |
| YAZDANI, Farhan       | Surgery                                                 | HÔPITAL de PLOERMEL                                                                            | France                                                     |
| YAZLIK, Ayse          | Dr. / Weed science                                      | Düzce University Faculty of Agriculture and Natural Sciences Plant Protection Department       | Turkey                                                     |
| Yee, Mon Oo           | Phd candidate                                           | University of Southern Denmark                                                                 | Denmark                                                    |
| Yeigh, Tony           | Senior Researcher                                       | Southern Cross University                                                                      | Australia                                                  |
| Yela, José Luis       | Associate Professor of Zoology and Conservation Biology | University of Castilla-La Mancha                                                               | Spain                                                      |
| Yemm, Adrian          | Post-Doctoral Research Associate - Biomedical Research  | Newcastle University                                                                           | United Kingdom of Great Britain and Northern Ireland (the) |
| Yepez, Enrico A.      | Research Professor                                      | Instituto Tecnológico de Sonora                                                                | Mexico                                                     |
| Yeremiy, Jennifer     | Geophysicist                                            | University of Alberta                                                                          | Canada                                                     |
| Yerger, Ellen         | Assistant Professor of Biology                          | Indiana University of Pennsylvania, Indiana PA, USA                                            | United States of America (the)                             |
| Yeşilyurt, Burcu      | Instructor                                              | TED university                                                                                 | Turkey                                                     |
| Yeste, Antonio        | Researcher, Ecology                                     | Universidad Pública de Navarra                                                                 | Spain                                                      |
| Yetman, Caroline      | Zoologist                                               | Self-employed                                                                                  | South Africa                                               |
| Yeung, Alex Chee Yu   | PhD graduate                                            | University of British Columbia                                                                 | Canada                                                     |
| Yoccoz, Nigel         | Professor Ecology                                       | UiT The Arctic University of Norway                                                            | Norway                                                     |
| Yokochi, Kaori        | Teaching Scholar in Conservation Biology                | Deakin University                                                                              | Australia                                                  |
| Yönder, Özlem         | PostDoc in Quantum Chemistry                            | Ruhr-University Bochum                                                                         | Germany                                                    |
| Yonga, Paul           | Medicine/Infectious & Tropical Diseases                 | Fountain Health Care Hospital                                                                  | Kenya                                                      |
| Yoon, Hyun Seok       | Graduate Student/ conservation biology                  | University of Tennessee, Knoxville                                                             | United States of America (the)                             |
| Yordanova, Kristina   | Computer Science                                        | University of Rostock                                                                          | Germany                                                    |
| Yoshida, Yuki         | Assistant Professor, Sustainability Science             | Hiroshima University                                                                           | Japan                                                      |
| Youbi, Nasrddine      | Professor/Geosciences                                   | Department of Geology, Faculty of Sciences-Semlalia, Cadi Ayyad University, Marrakesh, Morocco | Morocco                                                    |
| YOUBI, NASRRDDINE     | Professor/Geology                                       | Cadi Ayyad University                                                                          | Morocco                                                    |
| Youlatos, Dionisios   | Professor of Zoology                                    | Aristotle University of Thessaloniki                                                           | Greece                                                     |
| Young, Mirjam         | PhD Student in Behavioural Ecology                      | Leipzig University                                                                             | Germany                                                    |
| Young, Einir          | Director of Sustainability                              | Bangor University                                                                              | United Kingdom of Great Britain and Northern Ireland (the) |
| Young, Joanna         | PhD Candidate Geophysics/Glaciology                     | University of Alaska Fairbanks                                                                 | United States of America (the)                             |
| Young, Fiona          | Natural Scientist                                       | BioScience Holistics                                                                           | United Kingdom of Great Britain and Northern Ireland (the) |

|                              |                                                                    |                                                                                            |                                                            |
|------------------------------|--------------------------------------------------------------------|--------------------------------------------------------------------------------------------|------------------------------------------------------------|
| Young, Rebecca               | ecological physiologist                                            |                                                                                            | United States of America (the)                             |
| Young, Aythya                | PhD Student                                                        | The University of Edinburgh                                                                | United Kingdom of Great Britain and Northern Ireland (the) |
| Young, Kenneth               | Professor, Geography and the Environment                           | University of Texas at Austin                                                              | United States of America (the)                             |
| Young, Catherine             | Ecology                                                            | University of Tasmania                                                                     | Australia                                                  |
| Young, Kyle                  | Ecologist                                                          | University of Zurich                                                                       | United States of America (the)                             |
| Young, Paul                  | Senior Lecturer in Biochemistry                                    | University College Cork                                                                    | Ireland                                                    |
| Yount, John D                | Ecology                                                            | Environmental Protection Agency                                                            | United States of America (the)                             |
| Youtz, Joseph                | Masters Candidate in Biology                                       | Arkansas State University                                                                  | United States of America (the)                             |
| Yovovich, Veronica           | Postdoc Researcher                                                 | University of California, Berkeley                                                         | United States of America (the)                             |
| Yow, Donald                  | Professor, Dept of Physics, Geosciences, and Astronomy             | Eastern Kentucky University                                                                | United States of America (the)                             |
| Ypma, Stefanie               | PhD Student in Physical Oceanography                               | Delft University of Technology                                                             | Netherlands (the)                                          |
| Yu, LILI                     | Postdoctoral researcher                                            | Macquarie University                                                                       | Australia                                                  |
| Yu, Man                      | Environmental Engineering                                          | UNSW Sydney                                                                                | Australia                                                  |
| Yuille, Martin               | Honorary Reader                                                    | The University of manchester                                                               | United Kingdom of Great Britain and Northern Ireland (the) |
| Yule, Kelsey                 | Ecology and Evolutionary Biology                                   | Arizona State University                                                                   | United States of America (the)                             |
| Yule, Catherine              | Professor of Ecology and Head of School of Science and Engineering | University of the Sunshine Coast                                                           | Australia                                                  |
| Yulizar, Yulizar             | Lecturer                                                           | Universitas Pertamina                                                                      | Indonesia                                                  |
| Yun, Joao                    | Associate professor of Astrophysics                                | University of Lisbon                                                                       | Portugal                                                   |
| Yusefi, Gholam Hosein        | PhD- Biodiversty, Genetics & Evolution                             | Cíbio/InBio                                                                                | Portugal                                                   |
| Yusuf, Abdullahi             | Researcher in Chemical Ecology                                     | University of Pretoria                                                                     | South Africa                                               |
| Yves, Desdevises             | Professor in Marine Biology                                        | Sorbonne Université                                                                        | France                                                     |
| Zaccone, Claudio             | Professor of Agricultural Chemistry                                | University of Verona                                                                       | Italy                                                      |
| Zachmann, Gabriel            | Professor of Computer Science                                      | University of Bremen                                                                       | Germany                                                    |
| Zaelke, Durwood              | Adjunct Professor                                                  | Bren School of Environmental Science & Management, University of California, Santa Barbara | United States of America (the)                             |
| Zafrilla, Jorge              | Assistant Professor                                                | University of Castilla-La Mancha                                                           | Spain                                                      |
| Zagalska-Neubauer, Magdalena | Biology                                                            | Univerisy of Wroclaw, Department of Behavioural Ecology                                    | Poland                                                     |
| Zaganescu, Calin             | Air Quality Modelling Scientist                                    | Environment and Climate Change Canada (ECCC)                                               | Canada                                                     |
| Zagar, Anamarija             | Herpetologist                                                      |                                                                                            | Slovenia                                                   |
| Zagmajster, Maja             | Subterranean Biology                                               | University of Ljubljana                                                                    | Slovenia                                                   |
| Zagrean, Leon                | Physiology and Neuroscience                                        | ”Carol Davila” University of Medicine and Pharmacy                                         | Romania                                                    |
| Zaguri, Moshe                | Ecologist                                                          | The Hebrew University of Jerusalem                                                         | Israel                                                     |
| Zahavi-Ely, Avishag          | Plant physiologist (retired)                                       | ARO The Volcani Center Beit Dagan                                                          | Israel                                                     |
| Zahmel, Jennifer             | Reproduction Biology                                               | Leibniz-Institut für Zoo- und Wildtierforschung                                            | Germany                                                    |
| Zahrnt, Angelika             | economist                                                          | Institute for Ecological Economy Research (IÖW), Berlin Germany                            | Germany                                                    |



|                            |                                               |                                                                                       |                                |
|----------------------------|-----------------------------------------------|---------------------------------------------------------------------------------------|--------------------------------|
| Zajicek, Petr              | Post-Doc                                      | Senckenberg Research Institute and Natural History Museum                             | Germany                        |
| Zajitschek, Susanne        |                                               | UNSW                                                                                  | Australia                      |
| Zajonz, Uwe                | Researcher / Biology                          | Senckenberg Biodiversity and Climate Research Centre                                  | Germany                        |
| Zak, Marcelo R.            | Professor, Biologist                          | Department of Geography, National University of Cordoba and IMBIV (UNC-CONICET)       | Argentina                      |
| Zakharova, Liubov          | PhD Student in Ecological Modelling           | University of Göttingen                                                               | Germany                        |
| Zala, Diana                | researcher                                    | Inserm                                                                                | France                         |
| Zalba, Sergio              | Professor                                     | Universidad nacional del Sur                                                          | Argentina                      |
| Zaller, Johann             | Assoc Prof, Ecologist                         | University of Natural Resources and Life Sciences Vienna                              | Austria                        |
| zamani, neviaty            | lecture/marine science and coastal management | IPB university (Bogor Agriculture University)                                         | Indonesia                      |
| Zamanillo, Marina          | Marine biology                                |                                                                                       | Spain                          |
| Zamboni, Nadia             | Biologist and PhD student in Ecology          | Federal University of Rio Grande do Norte                                             | Brazil                         |
| Zambryski, Patricia        | Professor of Plant and Microbial Biology      | University of California Berkeley                                                     | United States of America (the) |
| Zammit, Gabrielle          | Microbiologist/ Phycologist                   | University of Malta                                                                   | Malta                          |
| Zamora Meléndez, Alejandro | Professor of Plant Physiology                 | Universidad Nacional de Costa Rica                                                    | Costa Rica                     |
| ZAMORA-MUÑOZ, CARMEN       | Senior Lecturer                               | University of Granada                                                                 | Spain                          |
| Zamorano-Elgueta, Carlos   | Assistant professor                           | Universidad de Aysén                                                                  | Chile                          |
| Zampaulo, Robson           | Biologo                                       | Vale                                                                                  | Brazil                         |
| Zampieri, Dario            | Associate professor                           | Department of Geosciences, University of Padova                                       | Italy                          |
| Zancolli, Giulia           | Postdoc in evolutionary biology               | Université de Lausanne                                                                | Switzerland                    |
| Zander, Richard            | Research Associate, Botany                    | Missouri Botanical Garden                                                             | United States of America (the) |
| Zandonà, Eugenia           | Assistant Professor                           | UNIVERSIDADE DO ESTADO DO RIO DE JANEIRO                                              | Brazil                         |
| Zandonadi, Daniel          | Professor of Plant Physiology                 | Universidade Federal do Rio de Janeiro                                                | Brazil                         |
| Zanger, Ron                | Environmental Laboratory Consultant           | US Environmental Protection Agency, Chicago, IL                                       | United States of America (the) |
| Zanini, Mirko              | Biologiste                                    | Study of ecology                                                                      | Switzerland                    |
| Zannoni, Nora              | Researcher/ Atmospheric Sciences              | National Research Council Italy                                                       | Italy                          |
| Zantout, Karim             | PostDoc                                       | Potsdam Institute for Climate Impact Research                                         | Germany                        |
| Zañudo, Melissa            | Master's student in marine biology            | ICMyL-UNAM                                                                            | Mexico                         |
| Zapata, Agustin G          | Professor of Cell Biology                     | COMPLUTENSE UNIVERSITY                                                                | Spain                          |
| Zapata, Fernando           | Professor, Marine Ecology                     | Universidad del Valle                                                                 | Colombia                       |
| Zapata, Felipe             | scientific software developer                 | Netherlands eScience Center                                                           | Netherlands (the)              |
| Zappa, Massimiliano        | Hydrology Researcher                          | Swiss Federal Research Institute WSL                                                  | Switzerland                    |
| Zarfós, Michael            | Postdoctoral Affiliate                        | State University of New York College of Environmental Science and Forestry (SUNY ESF) | United States of America (the) |
| Zarka, Philippe            | Dr. in Astrophysics                           | CNRS - Observatoire de Paris                                                          | France                         |
| Zarnetske, Phoebe          | Assistant Professor, Climate Change Ecology   | Michigan State University                                                             | United States of America (the) |
| Zaú, André Scarambone      | Associate Professor, Ecology and Conservation | Federal University of the State of Rio de Janeiro                                     | Brazil                         |
| Zavala, Maria Elena        | Professor of Biology                          | CSU Northridge                                                                        | United States of America (the) |

|                     |                                                               |                                                                                    |                                                            |
|---------------------|---------------------------------------------------------------|------------------------------------------------------------------------------------|------------------------------------------------------------|
| Zavorka, Libor      | researcher in animal ecology                                  | University of Glasgow                                                              | United Kingdom of Great Britain and Northern Ireland (the) |
| Zavrel, Tomas       | Scientist                                                     | Global Change Research Institute CAS                                               | Czech Republic (the)                                       |
| Zawadzki, Mikołaj   | Geophysics                                                    | University of Warsaw                                                               | Poland                                                     |
| Zboralski, Antoine  | PhD Candidate in Plant Microbiology                           | Université de Moncton                                                              | Canada                                                     |
| Zech, Ben           | Environmental diplomat (rtd)/consultant                       | Independent                                                                        | Netherlands (the)                                          |
| Zech, Jana          | Lab manager                                                   | Max Planck Institute for the science of human history                              | Germany                                                    |
| Zechmeister, Harald | Senior Scientist                                              | University of Vienna                                                               | Austria                                                    |
| Zegre, Nicolas      | Hydrologist                                                   | West Virginia University                                                           | United States of America (the)                             |
| Zehl, Roman         | Research assistant                                            | University of applied sciences and arts Northwestern Switzerland                   | Switzerland                                                |
| Zehl, Martin        | Senior Scientist/Chemistry                                    | University of Vienna                                                               | Austria                                                    |
| Zelaya, Patricia    | Ecology                                                       | Instituto de Ecología Regional-CONICET-UNT                                         | Argentina                                                  |
| Zelenika, Sasa      | Full Professor with Tenure                                    | University of Rijeka, Faculty of Engineering                                       | Croatia                                                    |
| Zelený, Jakub       | Ecologist                                                     | Czech Academy of Sciences                                                          | Czech Republic (the)                                       |
| Zelger, Isabel      | Research Associate                                            | ETH                                                                                | Switzerland                                                |
| Zelinski, Mary      | Research Associate Professor                                  | Oregon Health & Science University                                                 | United States of America (the)                             |
| Zeman, Herbert      | Biomedical Engineering                                        | Univ. Of Tenn Health Science Center                                                | United States of America (the)                             |
| zeng, yijian        | Assistant Professor                                           | ITC Faculty of Geo-information Science and Earth Observation, University of Twente | Netherlands (the)                                          |
| Zenkin, Nikolay     | Professor of Molecular Biology                                | Newcastle University                                                               | United Kingdom of Great Britain and Northern Ireland (the) |
| Zenteno, Pablo      | Geographer/Gaciologist                                        | INMAP                                                                              | Chile                                                      |
| Zepharovich, Elena  | PhD in Geography                                              | Centre for Development and Enviornment                                             | Switzerland                                                |
| Zeppelini, Douglas  | Prof. Dr. / Invertebrates Zoology                             | University of State Paraiba                                                        | Brazil                                                     |
| Zerefso, Christos   | Head, Research Center for Atmospheric Physics and Climatology | Academy of Athens                                                                  | Greece                                                     |
| Zethof, Jeroen      | PhD student                                                   | TU Dresden                                                                         | Germany                                                    |
| Zhan, Qing          | Junior Researcher                                             | NIOO-KNAW                                                                          | Netherlands (the)                                          |
| Zhang, Shuang       | PhD                                                           |                                                                                    | Austria                                                    |
| Zhang, Siju         | PhD student of Astrophysics                                   | Laboratoire d'Astrophysique de Marseille                                           | France                                                     |
| Zhang, Jian         | Professor in Ecology                                          | East China Normal University                                                       | China                                                      |
| Zhang, Zhijie       |                                                               | University of Konstanz                                                             | Germany                                                    |
| ZHANG, FAN          | Senior Lecturer in Architectual Sience                        | Griffith University                                                                | Australia                                                  |
| Zhao, Meng          | Research                                                      | The GLOBE Institute /KU                                                            | Denmark                                                    |
| Zhao, Lily          | Astronomy Graduate Student                                    | Yale University                                                                    | United States of America (the)                             |
| Zhu, Judy           | PhD candidate, Cognitive Neuroscience                         | Macquarie University                                                               | Australia                                                  |
| Ziadé, Francois     | Researcher                                                    | LNE                                                                                | France                                                     |
| Ziegler, Kathrin    | Sustainable Resouce Management                                |                                                                                    | Germany                                                    |
| Ziegler, Camille    | PhD student                                                   | Université de Lorraine - UMR Silva - UMR Ecofog                                    | Finland                                                    |
| Zielcke, Johannes   | Atmospheric science                                           | Heidelberg University                                                              | Germany                                                    |
| Zieler, Helge       | President                                                     | Primordial Genetics Inc.                                                           | United States of America (the)                             |

|                                  |                                                                             |                                                                              |                                                            |
|----------------------------------|-----------------------------------------------------------------------------|------------------------------------------------------------------------------|------------------------------------------------------------|
| Zieliński, Piotr                 | Post-doc in Evolutionary Biology                                            | Institute of Environmental Sciences, Jagiellonian University                 | Poland                                                     |
| Ziem Nascimento, Andrey Fabricio | Researcher, Structural Biology                                              | Brazilian Synchrotron Light Laboratory                                       | Brazil                                                     |
| Zierden, Mark                    | Postdoctoral Research Associate                                             | University of Wisconsin-Madison                                              | United States of America (the)                             |
| Ziglio, Luciana                  | Doutora em Geografia Humana                                                 | Universidade de São Paulo                                                    | Brazil                                                     |
| Zikova, Nada                     | Researcher                                                                  | Institute of Chemical Process Fundamentals                                   | Czech Republic (the)                                       |
| Zilinskas, Saulius               | MSc. Environmental Engineering "ANALYSIS AND EVALUATION OF CLIMATE CHANGE " | Lithuanian Hydrometeorological Service, ASU, VDU                             | Lithuania                                                  |
| Ziller, Silvia                   | Forest Engineer, PhD Biological Invasions                                   | The Horus Institute for Environmental Conservation and Development           | Brazil                                                     |
| Zim, Nomakula                    | MSc Microbiology candidate                                                  | University of Pretoria                                                       | South Africa                                               |
| Zimmerman, Amy                   | Research Scientist                                                          | University of Chicago                                                        | United States of America (the)                             |
| Zimmerman, Rachel                | Marine biologist                                                            | Miss                                                                         | United States of America (the)                             |
| Zimmermann, Niklaus E.           | Adjunct Professor ETHZ/Senior Scientist                                     | Swiss Federal Research Institute WSL                                         | Switzerland                                                |
| Zimmermann Teixeira, Fernanda    | Postdoctoral researcher fellow                                              | Universidade Federal do Rio Grande do Sul                                    | Brazil                                                     |
| Zimmers, Teresa                  | Professor of Cell, Developmental and Cancer Biologi                         | Oregon, Health and Science University                                        | United States of America (the)                             |
| Zimny, Marcelina                 |                                                                             | University of Gdansk, Faculty of Biology                                     | Poland                                                     |
| Zimova, Marketa                  | Post-doctoral fellow                                                        | University of Michigan                                                       | United States of America (the)                             |
| Zinger, Lucie                    | Assistant Professor                                                         | IBENS - ENS                                                                  | France                                                     |
| Zinke, Jens                      | Professor in Palaeobiology                                                  | University of Leicester                                                      | United Kingdom of Great Britain and Northern Ireland (the) |
| Zinser, Alexander                | Process Engineer                                                            | Martin-Luther-University Halle-Wittenberg                                    | Germany                                                    |
| Zinsner, Helene                  | Lecturer                                                                    | Stevens Institute                                                            | United States of America (the)                             |
| Zipf, Lars                       | PhD student Glaciology                                                      | Université libre de Bruxelles                                                | Belgium                                                    |
| Zipper, Carl E.                  | Plant and Environmental Sciences (retired)                                  | Virginia Tech                                                                | United States of America (the)                             |
| Zipplies, Johannes               | PhD-Candidate, Thermal Engineering                                          | University of Kassel, Institute for Thermal Engineering                      | Germany                                                    |
| Zirngibl, Manuela                | Dipl. Math., M.Sc.                                                          | OTH Regensburg                                                               | Germany                                                    |
| Zitani, Nina                     | Curator, Zoological Collections                                             | Western University                                                           | Canada                                                     |
| Zivanovic, Goran                 | Senior research associate/Population genetics                               | Institute for Biological Research "Sinisa Stankovic", University of Belgrade | Serbia                                                     |
| Zizka, Alexander                 | PostDoc, Biogeography                                                       | German Center for INtegrative Biodiversity Research                          | Germany                                                    |
| Zlamal, Tomas                    | PhD student                                                                 | Global Change Research Institute CAS                                         | Czech Republic (the)                                       |
| Zlatkov, Boyan                   | Assistant professor, entomology                                             | Bulgarian Academy of Sciences                                                | Bulgaria                                                   |
| Zobel, Martin                    | professor of plant ecology                                                  | University of Tartu                                                          | Estonia                                                    |
| Zocatelli, Renata                | Researcher assistant                                                        | CNRS                                                                         | France                                                     |
| Zomer, Robert                    | Visiting Professor/ Senior Landscape Ecologist                              | Kunming Institute of Botany/ Chinese Academy of Science                      | United States of America (the)                             |
| Zondervan, Edwin                 | Professor of process systems engineering                                    | University of Twente                                                         | Netherlands (the)                                          |
| Zook, Douglas                    | Professor in Global Ecology and Science Education                           | UMass/Boston School for the Environment                                      | United States of America (the)                             |
| Zopf, Regine                     | Postdoctoral Fellow                                                         | Macquarie University                                                         | Australia                                                  |
| ZORRO-SANCHEZ, Carlos            | Associated Professor                                                        | Universidad de los Andes, Bogota                                             | Colombia                                                   |

|                        |                                                                                |                                                                                      |                                                            |
|------------------------|--------------------------------------------------------------------------------|--------------------------------------------------------------------------------------|------------------------------------------------------------|
| Zosseder, Kai          | Assistant Professor / Hydrogeologie and Geothermal Energy                      | Technical Universität Munich                                                         | Germany                                                    |
| Zotz, Gerhard          | Plant Ecology                                                                  | Carl von Ossietzky University Oldenburg                                              | Germany                                                    |
| Zoubian, Julien        | research engineer                                                              | Aix Marseille Univ, CNRS/IN2P3, CPPM, Marseille, France                              | France                                                     |
| Zourou, Katerina       | Researcher                                                                     | Open University                                                                      | Greece                                                     |
| Zózimo, Joana          | Statistical Analyst - Health Sociologist                                       |                                                                                      | Portugal                                                   |
| Zribi, Mehrez          | Research director                                                              | CNRS                                                                                 | France                                                     |
| zu Ermgassen, Sophus   | Ecological economics                                                           | Durrell Institute for Conservation and Ecology, University of Kent                   | United Kingdom of Great Britain and Northern Ireland (the) |
| Zuanon, Jansen         | Full Researcher                                                                | Instituto nacional de Pesquisas da Amazônia                                          | Brazil                                                     |
| Zubcevic, Jasenka      | Associate professor of Physiology                                              | University of Toledo                                                                 | United States of America (the)                             |
| Zuberogitia, Iñigo     | Director of wildlife department                                                | Estudios Medioambientales Icarus S.L.                                                | Spain                                                      |
| Zubietta, Marco        | Computer Science                                                               | Green Fab Lab Network                                                                | United States of America (the)                             |
| Zuccarello, Francesca  | Professor / Solar Physics                                                      | University of Catania                                                                | Italy                                                      |
| Zug, Rebecca           | Conservation Biology Professor/Researcher                                      | Universidad San Francisco de Quito                                                   | Ecuador                                                    |
| Zuidema, Pieter        | Professor of Tropical Forest Ecology                                           | Wageningen University                                                                | Netherlands (the)                                          |
| Zuleta, Daniel         | Postdoctoral Researcher                                                        | Smithsonian Tropical Research Institute                                              | United States of America (the)                             |
| Zuleta, Gustavo        | Director                                                                       | Dept. Ecology & Environmental Sc., Maimonides University                             | Argentina                                                  |
| zuñiga, agustin        | Dr Physics                                                                     | Nuclear Energy Peruvian Institute                                                    | Peru                                                       |
| Žurek, Roman           | professor                                                                      | Institute of NAture Conservation, Polish Academy of Sciences                         | Poland                                                     |
| Zurell, Andreas        | WM                                                                             | University of Potsdam                                                                | Germany                                                    |
| Zurita-Milla, Raul     | Prof. Spatio-temporal analytics                                                | Faculty of Geo-information Science and Earth Observation (ITC), University of Twente | Netherlands (the)                                          |
| Zurlini, Giovanni      | Professor of Ecology                                                           | University of Salento                                                                | Italy                                                      |
| Zurlo, Francesco       | Docente scienze giuridiche ed economiche                                       | Polo di Cutro                                                                        | Italy                                                      |
| Zürn-Müller, Hildegard | Dr. med.                                                                       | retired                                                                              | Germany                                                    |
| Züst, Marc Alain       | Postdoctoral Researcher, Neuroscience                                          | University of Bern                                                                   | Switzerland                                                |
| Zutinic, Petar         | Assistant professor                                                            | Faculty of Science, University of Zagreb                                             | Croatia                                                    |
| Žutinić, Petar         | Assistant professor                                                            | Univeristy of Zagreb, Faculty of Science, Department of Biology                      | Croatia                                                    |
| Zwander, Helmut        | Professor                                                                      | Pädagogische Hochschule Kärnten                                                      | Austria                                                    |
| Zwartsenberg, Sophie   | PhD Candidate                                                                  | Wageningen University                                                                | Netherlands (the)                                          |
| Zwickle, Adam          | Professor of Risk Communication and Decision Science                           | Michigan State University                                                            | United States of America (the)                             |
| Zych, Marcin           | Director / Evolutionary biologist                                              | University of Warsaw Botanic Garden                                                  | Poland                                                     |
| Życki, Artur           | Professor of Social Science                                                    | Jan Kochanowski University in Kielce                                                 | Poland                                                     |
| סחר, Tali              | Sahar                                                                          | Hebrew University of Jerusalem                                                       | Israel                                                     |
| (nee Olm) Eachus, Myra | Ph.D Research Scientist in Physical Chemistry and Solid State Physics, retired | Eastman Kodak Research Laboratories, Rochester, NY                                   | United States of America (the)                             |
